# Supplementary material for: Alteration of Colonic Bacterial and Fungal Composition and Their Inter- and Intra-Kingdom Interaction in Patients with Adenomas with Low-Grade Dysplasia
Source: Microorganisms. 2023 May 18;11(5):1327. doi: 10.3390/microorganisms11051327 (PMC10223777; doi:10.3390/microorganisms11051327)
Supplement: Supplementary file 1 [file microorganisms-11-01327-s001.zip › Table S1 Bacteria LEfSe_Group_P_vs_N.xlsx]

## Sheet: Sheet1
Group	NC1	ALGD1	NC2	ALGD2	NC3	ALGD3	NC4	ALGD4	NC5	ALGD5	NC6	ALGD6	NC7	ALGD7	NC8	ALGD8	NC9	ALGD9	NC10	ALGD10	NC11	ALGD11	NC12	ALGD12	NC13	ALGD13	NC14	ALGD14	NC15	ALGD15	NC16	ALGD16	NC17	ALGD17	NC18	ALGD18	NC19	ALGD19	NC20	ALGD20	NC21	ALGD21	NC22	ALGD22	NC23	ALGD23	NC24	ALGD24	NC25
d__Bacteria	94.4704	97.1828	99.2734	96.3016	99.9964	99.9999	99.9657	99.991	99.8778	99.932	99.9808	99.9038	99.9959	99.9423	99.8995	99.8278	99.788	99.9715	99.957	100	99.9967	99.9865	98.0493	99.6633	99.8649	97.6643	99.9785	99.5613	99.9565	99.1002	98.7273	97.9526	100	99.9999	99.9831	99.7281	99.9788	100	99.8004	99.9956	99.5904	98.9778	99.9428	100	99.9999	99.9798	100	99.6383	100
d__Bacteria|p__Acidobacteriota	0.6135	0	0.05961	0.83697	0	0.00306	0	0	0	0	0.00385	0.04041	0	0	0	0.01324	0.02168	0.00658	0	0.0033	0.10126	0	0	0.09014	0	0	0	0	0	0.15963	0.06993	0.06447	0	0.02421	0	0	0	0	0.66122	0.02325	0.00836	0.79813	0.04203	0	0	0	0	0.78136	0
d__Bacteria|p__Acidobacteriota|c__Acidobacteriae	0	0	0	0	0	0	0	0	0	0	0.00385	0.01539	0	0	0	0.01324	0.02168	0.00658	0	0.0033	0.0692	0	0	0.02121	0	0	0	0	0	0.07257	0	0.00561	0	0	0	0	0	0	0	0	0	0	0.02858	0	0	0	0	0	0
d__Bacteria|p__Acidobacteriota|c__Acidobacteriae|o__Acidobacteriae_unclassified	0	0	0	0	0	0	0	0	0	0	0	0	0	0	0	0	0	0	0	0	0.00675	0	0	0	0	0	0	0	0	0	0	0	0	0	0	0	0	0	0	0	0	0	0	0	0	0	0	0	0
d__Bacteria|p__Acidobacteriota|c__Acidobacteriae|o__Acidobacteriae_unclassified|f__Acidobacteriae_unclassified	0	0	0	0	0	0	0	0	0	0	0	0	0	0	0	0	0	0	0	0	0.00675	0	0	0	0	0	0	0	0	0	0	0	0	0	0	0	0	0	0	0	0	0	0	0	0	0	0	0	0
d__Bacteria|p__Acidobacteriota|c__Acidobacteriae|o__Acidobacteriae_unclassified|f__Acidobacteriae_unclassified|g__Acidobacteriae_unclassified	0	0	0	0	0	0	0	0	0	0	0	0	0	0	0	0	0	0	0	0	0.00675	0	0	0	0	0	0	0	0	0	0	0	0	0	0	0	0	0	0	0	0	0	0	0	0	0	0	0	0
d__Bacteria|p__Acidobacteriota|c__Acidobacteriae|o__Acidobacteriae_unclassified|f__Acidobacteriae_unclassified|g__Acidobacteriae_unclassified|s__Acidobacteriae_unclassified	0	0	0	0	0	0	0	0	0	0	0	0	0	0	0	0	0	0	0	0	0.00675	0	0	0	0	0	0	0	0	0	0	0	0	0	0	0	0	0	0	0	0	0	0	0	0	0	0	0	0
d__Bacteria|p__Acidobacteriota|c__Acidobacteriae|o__Acidobacteriales	0	0	0	0	0	0	0	0	0	0	0	0.00577	0	0	0	0	0.00964	0	0	0	0.03207	0	0	0	0	0	0	0	0	0	0	0	0	0	0	0	0	0	0	0	0	0	0.02858	0	0	0	0	0	0
d__Bacteria|p__Acidobacteriota|c__Acidobacteriae|o__Acidobacteriales|f__Acidobacteriaceae_(Subgroup_1)	0	0	0	0	0	0	0	0	0	0	0	0	0	0	0	0	0	0	0	0	0.01688	0	0	0	0	0	0	0	0	0	0	0	0	0	0	0	0	0	0	0	0	0	0	0	0	0	0	0	0
d__Bacteria|p__Acidobacteriota|c__Acidobacteriae|o__Acidobacteriales|f__Acidobacteriaceae_(Subgroup_1)|g__Terracidiphilus	0	0	0	0	0	0	0	0	0	0	0	0	0	0	0	0	0	0	0	0	0.01688	0	0	0	0	0	0	0	0	0	0	0	0	0	0	0	0	0	0	0	0	0	0	0	0	0	0	0	0
d__Bacteria|p__Acidobacteriota|c__Acidobacteriae|o__Acidobacteriales|f__Acidobacteriaceae_(Subgroup_1)|g__Terracidiphilus|s__Terracidiphilus_unclassified	0	0	0	0	0	0	0	0	0	0	0	0	0	0	0	0	0	0	0	0	0.01688	0	0	0	0	0	0	0	0	0	0	0	0	0	0	0	0	0	0	0	0	0	0	0	0	0	0	0	0
d__Bacteria|p__Acidobacteriota|c__Acidobacteriae|o__Acidobacteriales|f__Acidobacteriales_unclassified	0	0	0	0	0	0	0	0	0	0	0	0.00577	0	0	0	0	0.00964	0	0	0	0.00506	0	0	0	0	0	0	0	0	0	0	0	0	0	0	0	0	0	0	0	0	0	0	0	0	0	0	0	0
d__Bacteria|p__Acidobacteriota|c__Acidobacteriae|o__Acidobacteriales|f__Acidobacteriales_unclassified|g__Acidobacteriales_unclassified	0	0	0	0	0	0	0	0	0	0	0	0.00577	0	0	0	0	0.00964	0	0	0	0.00506	0	0	0	0	0	0	0	0	0	0	0	0	0	0	0	0	0	0	0	0	0	0	0	0	0	0	0	0
d__Bacteria|p__Acidobacteriota|c__Acidobacteriae|o__Acidobacteriales|f__Acidobacteriales_unclassified|g__Acidobacteriales_unclassified|s__Acidobacteriales_unclassified	0	0	0	0	0	0	0	0	0	0	0	0.00577	0	0	0	0	0.00964	0	0	0	0.00506	0	0	0	0	0	0	0	0	0	0	0	0	0	0	0	0	0	0	0	0	0	0	0	0	0	0	0	0
d__Bacteria|p__Acidobacteriota|c__Acidobacteriae|o__Acidobacteriales|f__Koribacteraceae	0	0	0	0	0	0	0	0	0	0	0	0	0	0	0	0	0	0	0	0	0.01013	0	0	0	0	0	0	0	0	0	0	0	0	0	0	0	0	0	0	0	0	0	0.02858	0	0	0	0	0	0
d__Bacteria|p__Acidobacteriota|c__Acidobacteriae|o__Acidobacteriales|f__Koribacteraceae|g__Candidatus_Koribacter	0	0	0	0	0	0	0	0	0	0	0	0	0	0	0	0	0	0	0	0	0.01013	0	0	0	0	0	0	0	0	0	0	0	0	0	0	0	0	0	0	0	0	0	0.02858	0	0	0	0	0	0
d__Bacteria|p__Acidobacteriota|c__Acidobacteriae|o__Acidobacteriales|f__Koribacteraceae|g__Candidatus_Koribacter|s__Candidatus_Koribacter_unclassified	0	0	0	0	0	0	0	0	0	0	0	0	0	0	0	0	0	0	0	0	0.01013	0	0	0	0	0	0	0	0	0	0	0	0	0	0	0	0	0	0	0	0	0	0.02858	0	0	0	0	0	0
d__Bacteria|p__Acidobacteriota|c__Acidobacteriae|o__Bryobacterales	0	0	0	0	0	0	0	0	0	0	0	0	0	0	0	0	0	0	0	0	0	0	0	0.02121	0	0	0	0	0	0.07257	0	0.00561	0	0	0	0	0	0	0	0	0	0	0	0	0	0	0	0	0
d__Bacteria|p__Acidobacteriota|c__Acidobacteriae|o__Bryobacterales|f__Bryobacteraceae	0	0	0	0	0	0	0	0	0	0	0	0	0	0	0	0	0	0	0	0	0	0	0	0.02121	0	0	0	0	0	0.07257	0	0.00561	0	0	0	0	0	0	0	0	0	0	0	0	0	0	0	0	0
d__Bacteria|p__Acidobacteriota|c__Acidobacteriae|o__Bryobacterales|f__Bryobacteraceae|g__Bryobacter	0	0	0	0	0	0	0	0	0	0	0	0	0	0	0	0	0	0	0	0	0	0	0	0.02121	0	0	0	0	0	0.07257	0	0.00561	0	0	0	0	0	0	0	0	0	0	0	0	0	0	0	0	0
d__Bacteria|p__Acidobacteriota|c__Acidobacteriae|o__Bryobacterales|f__Bryobacteraceae|g__Bryobacter|s__Bryobacter_unclassified	0	0	0	0	0	0	0	0	0	0	0	0	0	0	0	0	0	0	0	0	0	0	0	0.02121	0	0	0	0	0	0.07257	0	0.00561	0	0	0	0	0	0	0	0	0	0	0	0	0	0	0	0	0
d__Bacteria|p__Acidobacteriota|c__Acidobacteriae|o__Solibacterales	0	0	0	0	0	0	0	0	0	0	0	0	0	0	0	0	0	0.00658	0	0.0033	0.03038	0	0	0	0	0	0	0	0	0	0	0	0	0	0	0	0	0	0	0	0	0	0	0	0	0	0	0	0
d__Bacteria|p__Acidobacteriota|c__Acidobacteriae|o__Solibacterales|f__Solibacteraceae	0	0	0	0	0	0	0	0	0	0	0	0	0	0	0	0	0	0.00658	0	0.0033	0.03038	0	0	0	0	0	0	0	0	0	0	0	0	0	0	0	0	0	0	0	0	0	0	0	0	0	0	0	0
d__Bacteria|p__Acidobacteriota|c__Acidobacteriae|o__Solibacterales|f__Solibacteraceae|g__Candidatus_Solibacter	0	0	0	0	0	0	0	0	0	0	0	0	0	0	0	0	0	0.00658	0	0.0033	0.03038	0	0	0	0	0	0	0	0	0	0	0	0	0	0	0	0	0	0	0	0	0	0	0	0	0	0	0	0
d__Bacteria|p__Acidobacteriota|c__Acidobacteriae|o__Solibacterales|f__Solibacteraceae|g__Candidatus_Solibacter|s__Candidatus_Solibacter_unclassified	0	0	0	0	0	0	0	0	0	0	0	0	0	0	0	0	0	0.00658	0	0.0033	0.03038	0	0	0	0	0	0	0	0	0	0	0	0	0	0	0	0	0	0	0	0	0	0	0	0	0	0	0	0
d__Bacteria|p__Acidobacteriota|c__Acidobacteriae|o__Subgroup_2	0	0	0	0	0	0	0	0	0	0	0.00385	0.00962	0	0	0	0.01324	0.01204	0	0	0	0	0	0	0	0	0	0	0	0	0	0	0	0	0	0	0	0	0	0	0	0	0	0	0	0	0	0	0	0
d__Bacteria|p__Acidobacteriota|c__Acidobacteriae|o__Subgroup_2|f__Subgroup_2_unclassified	0	0	0	0	0	0	0	0	0	0	0.00385	0.00962	0	0	0	0.01324	0.01204	0	0	0	0	0	0	0	0	0	0	0	0	0	0	0	0	0	0	0	0	0	0	0	0	0	0	0	0	0	0	0	0
d__Bacteria|p__Acidobacteriota|c__Acidobacteriae|o__Subgroup_2|f__Subgroup_2_unclassified|g__Subgroup_2_unclassified	0	0	0	0	0	0	0	0	0	0	0.00385	0.00962	0	0	0	0.01324	0.01204	0	0	0	0	0	0	0	0	0	0	0	0	0	0	0	0	0	0	0	0	0	0	0	0	0	0	0	0	0	0	0	0
d__Bacteria|p__Acidobacteriota|c__Acidobacteriae|o__Subgroup_2|f__Subgroup_2_unclassified|g__Subgroup_2_unclassified|s__Subgroup_2_unclassified	0	0	0	0	0	0	0	0	0	0	0.00385	0.00962	0	0	0	0.01324	0.01204	0	0	0	0	0	0	0	0	0	0	0	0	0	0	0	0	0	0	0	0	0	0	0	0	0	0	0	0	0	0	0	0
d__Bacteria|p__Acidobacteriota|c__Acidobacteriota_unclassified	0.01636	0	0	0	0	0.00306	0	0	0	0	0	0.02502	0	0	0	0	0	0	0	0	0	0	0	0	0	0	0	0	0	0.00435	0.01243	0.0028	0	0.00807	0	0	0	0	0	0	0	0	0	0	0	0	0	0	0
d__Bacteria|p__Acidobacteriota|c__Acidobacteriota_unclassified|o__Acidobacteriota_unclassified	0.01636	0	0	0	0	0.00306	0	0	0	0	0	0.02502	0	0	0	0	0	0	0	0	0	0	0	0	0	0	0	0	0	0.00435	0.01243	0.0028	0	0.00807	0	0	0	0	0	0	0	0	0	0	0	0	0	0	0
d__Bacteria|p__Acidobacteriota|c__Acidobacteriota_unclassified|o__Acidobacteriota_unclassified|f__Acidobacteriota_unclassified	0.01636	0	0	0	0	0.00306	0	0	0	0	0	0.02502	0	0	0	0	0	0	0	0	0	0	0	0	0	0	0	0	0	0.00435	0.01243	0.0028	0	0.00807	0	0	0	0	0	0	0	0	0	0	0	0	0	0	0
d__Bacteria|p__Acidobacteriota|c__Acidobacteriota_unclassified|o__Acidobacteriota_unclassified|f__Acidobacteriota_unclassified|g__Acidobacteriota_unclassified	0.01636	0	0	0	0	0.00306	0	0	0	0	0	0.02502	0	0	0	0	0	0	0	0	0	0	0	0	0	0	0	0	0	0.00435	0.01243	0.0028	0	0.00807	0	0	0	0	0	0	0	0	0	0	0	0	0	0	0
d__Bacteria|p__Acidobacteriota|c__Acidobacteriota_unclassified|o__Acidobacteriota_unclassified|f__Acidobacteriota_unclassified|g__Acidobacteriota_unclassified|s__Acidobacteriota_unclassified	0.01636	0	0	0	0	0.00306	0	0	0	0	0	0.02502	0	0	0	0	0	0	0	0	0	0	0	0	0	0	0	0	0	0.00435	0.01243	0.0028	0	0.00807	0	0	0	0	0	0	0	0	0	0	0	0	0	0	0
d__Bacteria|p__Acidobacteriota|c__Blastocatellia	0.59714	0	0	0	0	0	0	0	0	0	0	0	0	0	0	0	0	0	0	0	0	0	0	0	0	0	0	0	0	0.01886	0.00466	0.00561	0	0	0	0	0	0	0.59121	0.02325	0	0	0	0	0	0	0	0	0
d__Bacteria|p__Acidobacteriota|c__Blastocatellia|o__11-24	0	0	0	0	0	0	0	0	0	0	0	0	0	0	0	0	0	0	0	0	0	0	0	0	0	0	0	0	0	0	0.00466	0	0	0	0	0	0	0	0.41488	0	0	0	0	0	0	0	0	0	0
d__Bacteria|p__Acidobacteriota|c__Blastocatellia|o__11-24|f__11-24_unclassified	0	0	0	0	0	0	0	0	0	0	0	0	0	0	0	0	0	0	0	0	0	0	0	0	0	0	0	0	0	0	0.00466	0	0	0	0	0	0	0	0.41488	0	0	0	0	0	0	0	0	0	0
d__Bacteria|p__Acidobacteriota|c__Blastocatellia|o__11-24|f__11-24_unclassified|g__11-24_unclassified	0	0	0	0	0	0	0	0	0	0	0	0	0	0	0	0	0	0	0	0	0	0	0	0	0	0	0	0	0	0	0.00466	0	0	0	0	0	0	0	0.41488	0	0	0	0	0	0	0	0	0	0
d__Bacteria|p__Acidobacteriota|c__Blastocatellia|o__11-24|f__11-24_unclassified|g__11-24_unclassified|s__11-24_unclassified	0	0	0	0	0	0	0	0	0	0	0	0	0	0	0	0	0	0	0	0	0	0	0	0	0	0	0	0	0	0	0.00466	0	0	0	0	0	0	0	0.41488	0	0	0	0	0	0	0	0	0	0
d__Bacteria|p__Acidobacteriota|c__Blastocatellia|o__Blastocatellales	0.59714	0	0	0	0	0	0	0	0	0	0	0	0	0	0	0	0	0	0	0	0	0	0	0	0	0	0	0	0	0.00435	0	0	0	0	0	0	0	0	0	0	0	0	0	0	0	0	0	0	0
d__Bacteria|p__Acidobacteriota|c__Blastocatellia|o__Blastocatellales|f__Blastocatellaceae	0.59714	0	0	0	0	0	0	0	0	0	0	0	0	0	0	0	0	0	0	0	0	0	0	0	0	0	0	0	0	0.00435	0	0	0	0	0	0	0	0	0	0	0	0	0	0	0	0	0	0	0
d__Bacteria|p__Acidobacteriota|c__Blastocatellia|o__Blastocatellales|f__Blastocatellaceae|g__Aridibacter	0.59714	0	0	0	0	0	0	0	0	0	0	0	0	0	0	0	0	0	0	0	0	0	0	0	0	0	0	0	0	0.00435	0	0	0	0	0	0	0	0	0	0	0	0	0	0	0	0	0	0	0
d__Bacteria|p__Acidobacteriota|c__Blastocatellia|o__Blastocatellales|f__Blastocatellaceae|g__Aridibacter|s__Aridibacter_unclassified	0.59714	0	0	0	0	0	0	0	0	0	0	0	0	0	0	0	0	0	0	0	0	0	0	0	0	0	0	0	0	0.00435	0	0	0	0	0	0	0	0	0	0	0	0	0	0	0	0	0	0	0
d__Bacteria|p__Acidobacteriota|c__Blastocatellia|o__Blastocatellales|f__Blastocatellaceae|g__Blastocatella	0	0	0	0	0	0	0	0	0	0	0	0	0	0	0	0	0	0	0	0	0	0	0	0	0	0	0	0	0	0	0	0	0	0	0	0	0	0	0	0	0	0	0	0	0	0	0	0	0
d__Bacteria|p__Acidobacteriota|c__Blastocatellia|o__Blastocatellales|f__Blastocatellaceae|g__Blastocatella|s__Blastocatella_unclassified	0	0	0	0	0	0	0	0	0	0	0	0	0	0	0	0	0	0	0	0	0	0	0	0	0	0	0	0	0	0	0	0	0	0	0	0	0	0	0	0	0	0	0	0	0	0	0	0	0
d__Bacteria|p__Acidobacteriota|c__Blastocatellia|o__Pyrinomonadales	0	0	0	0	0	0	0	0	0	0	0	0	0	0	0	0	0	0	0	0	0	0	0	0	0	0	0	0	0	0.01451	0	0.00561	0	0	0	0	0	0	0.17633	0.02325	0	0	0	0	0	0	0	0	0
d__Bacteria|p__Acidobacteriota|c__Blastocatellia|o__Pyrinomonadales|f__Pyrinomonadaceae	0	0	0	0	0	0	0	0	0	0	0	0	0	0	0	0	0	0	0	0	0	0	0	0	0	0	0	0	0	0.01451	0	0.00561	0	0	0	0	0	0	0.17633	0.02325	0	0	0	0	0	0	0	0	0
d__Bacteria|p__Acidobacteriota|c__Blastocatellia|o__Pyrinomonadales|f__Pyrinomonadaceae|g__RB41	0	0	0	0	0	0	0	0	0	0	0	0	0	0	0	0	0	0	0	0	0	0	0	0	0	0	0	0	0	0.01451	0	0.00561	0	0	0	0	0	0	0.17633	0.02325	0	0	0	0	0	0	0	0	0
d__Bacteria|p__Acidobacteriota|c__Blastocatellia|o__Pyrinomonadales|f__Pyrinomonadaceae|g__RB41|s__RB41_unclassified	0	0	0	0	0	0	0	0	0	0	0	0	0	0	0	0	0	0	0	0	0	0	0	0	0	0	0	0	0	0.01451	0	0.00561	0	0	0	0	0	0	0.17633	0.02325	0	0	0	0	0	0	0	0	0
d__Bacteria|p__Acidobacteriota|c__Holophagae	0	0	0	0	0	0	0	0	0	0	0	0	0	0	0	0	0	0	0	0	0.03206	0	0	0	0	0	0	0	0	0.00435	0.00777	0	0	0	0	0	0	0	0	0	0	0	0	0	0	0	0	0	0
d__Bacteria|p__Acidobacteriota|c__Holophagae|o__Subgroup_7	0	0	0	0	0	0	0	0	0	0	0	0	0	0	0	0	0	0	0	0	0.03206	0	0	0	0	0	0	0	0	0.00435	0.00777	0	0	0	0	0	0	0	0	0	0	0	0	0	0	0	0	0	0
d__Bacteria|p__Acidobacteriota|c__Holophagae|o__Subgroup_7|f__Subgroup_7_unclassified	0	0	0	0	0	0	0	0	0	0	0	0	0	0	0	0	0	0	0	0	0.03206	0	0	0	0	0	0	0	0	0.00435	0.00777	0	0	0	0	0	0	0	0	0	0	0	0	0	0	0	0	0	0
d__Bacteria|p__Acidobacteriota|c__Holophagae|o__Subgroup_7|f__Subgroup_7_unclassified|g__Subgroup_7_unclassified	0	0	0	0	0	0	0	0	0	0	0	0	0	0	0	0	0	0	0	0	0.03206	0	0	0	0	0	0	0	0	0.00435	0.00777	0	0	0	0	0	0	0	0	0	0	0	0	0	0	0	0	0	0
d__Bacteria|p__Acidobacteriota|c__Holophagae|o__Subgroup_7|f__Subgroup_7_unclassified|g__Subgroup_7_unclassified|s__Subgroup_7_unclassified	0	0	0	0	0	0	0	0	0	0	0	0	0	0	0	0	0	0	0	0	0.03206	0	0	0	0	0	0	0	0	0.00435	0.00777	0	0	0	0	0	0	0	0	0	0	0	0	0	0	0	0	0	0
d__Bacteria|p__Acidobacteriota|c__Subgroup_11	0	0	0	0	0	0	0	0	0	0	0	0	0	0	0	0	0	0	0	0	0	0	0	0	0	0	0	0	0	0	0	0	0	0	0	0	0	0	0	0	0	0	0	0	0	0	0	0	0
d__Bacteria|p__Acidobacteriota|c__Subgroup_11|o__Subgroup_11_unclassified	0	0	0	0	0	0	0	0	0	0	0	0	0	0	0	0	0	0	0	0	0	0	0	0	0	0	0	0	0	0	0	0	0	0	0	0	0	0	0	0	0	0	0	0	0	0	0	0	0
d__Bacteria|p__Acidobacteriota|c__Subgroup_11|o__Subgroup_11_unclassified|f__Subgroup_11_unclassified	0	0	0	0	0	0	0	0	0	0	0	0	0	0	0	0	0	0	0	0	0	0	0	0	0	0	0	0	0	0	0	0	0	0	0	0	0	0	0	0	0	0	0	0	0	0	0	0	0
d__Bacteria|p__Acidobacteriota|c__Subgroup_11|o__Subgroup_11_unclassified|f__Subgroup_11_unclassified|g__Subgroup_11_unclassified	0	0	0	0	0	0	0	0	0	0	0	0	0	0	0	0	0	0	0	0	0	0	0	0	0	0	0	0	0	0	0	0	0	0	0	0	0	0	0	0	0	0	0	0	0	0	0	0	0
d__Bacteria|p__Acidobacteriota|c__Subgroup_11|o__Subgroup_11_unclassified|f__Subgroup_11_unclassified|g__Subgroup_11_unclassified|s__Subgroup_11_unclassified	0	0	0	0	0	0	0	0	0	0	0	0	0	0	0	0	0	0	0	0	0	0	0	0	0	0	0	0	0	0	0	0	0	0	0	0	0	0	0	0	0	0	0	0	0	0	0	0	0
d__Bacteria|p__Acidobacteriota|c__Subgroup_18	0	0	0	0	0	0	0	0	0	0	0	0	0	0	0	0	0	0	0	0	0	0	0	0	0	0	0	0	0	0	0	0	0	0	0	0	0	0	0	0	0	0	0	0	0	0	0	0	0
d__Bacteria|p__Acidobacteriota|c__Subgroup_18|o__Subgroup_18_unclassified	0	0	0	0	0	0	0	0	0	0	0	0	0	0	0	0	0	0	0	0	0	0	0	0	0	0	0	0	0	0	0	0	0	0	0	0	0	0	0	0	0	0	0	0	0	0	0	0	0
d__Bacteria|p__Acidobacteriota|c__Subgroup_18|o__Subgroup_18_unclassified|f__Subgroup_18_unclassified	0	0	0	0	0	0	0	0	0	0	0	0	0	0	0	0	0	0	0	0	0	0	0	0	0	0	0	0	0	0	0	0	0	0	0	0	0	0	0	0	0	0	0	0	0	0	0	0	0
d__Bacteria|p__Acidobacteriota|c__Subgroup_18|o__Subgroup_18_unclassified|f__Subgroup_18_unclassified|g__Subgroup_18_unclassified	0	0	0	0	0	0	0	0	0	0	0	0	0	0	0	0	0	0	0	0	0	0	0	0	0	0	0	0	0	0	0	0	0	0	0	0	0	0	0	0	0	0	0	0	0	0	0	0	0
d__Bacteria|p__Acidobacteriota|c__Subgroup_18|o__Subgroup_18_unclassified|f__Subgroup_18_unclassified|g__Subgroup_18_unclassified|s__Subgroup_18_unclassified	0	0	0	0	0	0	0	0	0	0	0	0	0	0	0	0	0	0	0	0	0	0	0	0	0	0	0	0	0	0	0	0	0	0	0	0	0	0	0	0	0	0	0	0	0	0	0	0	0
d__Bacteria|p__Acidobacteriota|c__Subgroup_21	0	0	0	0	0	0	0	0	0	0	0	0	0	0	0	0	0	0	0	0	0	0	0	0	0	0	0	0	0	0	0	0	0	0	0	0	0	0	0	0	0	0	0	0	0	0	0	0	0
d__Bacteria|p__Acidobacteriota|c__Subgroup_21|o__Subgroup_21_unclassified	0	0	0	0	0	0	0	0	0	0	0	0	0	0	0	0	0	0	0	0	0	0	0	0	0	0	0	0	0	0	0	0	0	0	0	0	0	0	0	0	0	0	0	0	0	0	0	0	0
d__Bacteria|p__Acidobacteriota|c__Subgroup_21|o__Subgroup_21_unclassified|f__Subgroup_21_unclassified	0	0	0	0	0	0	0	0	0	0	0	0	0	0	0	0	0	0	0	0	0	0	0	0	0	0	0	0	0	0	0	0	0	0	0	0	0	0	0	0	0	0	0	0	0	0	0	0	0
d__Bacteria|p__Acidobacteriota|c__Subgroup_21|o__Subgroup_21_unclassified|f__Subgroup_21_unclassified|g__Subgroup_21_unclassified	0	0	0	0	0	0	0	0	0	0	0	0	0	0	0	0	0	0	0	0	0	0	0	0	0	0	0	0	0	0	0	0	0	0	0	0	0	0	0	0	0	0	0	0	0	0	0	0	0
d__Bacteria|p__Acidobacteriota|c__Subgroup_21|o__Subgroup_21_unclassified|f__Subgroup_21_unclassified|g__Subgroup_21_unclassified|s__Subgroup_21_unclassified	0	0	0	0	0	0	0	0	0	0	0	0	0	0	0	0	0	0	0	0	0	0	0	0	0	0	0	0	0	0	0	0	0	0	0	0	0	0	0	0	0	0	0	0	0	0	0	0	0
d__Bacteria|p__Acidobacteriota|c__Subgroup_22	0	0	0	0	0	0	0	0	0	0	0	0	0	0	0	0	0	0	0	0	0	0	0	0	0	0	0	0	0	0.00435	0	0	0	0	0	0	0	0	0	0	0	0	0	0	0	0	0	0	0
d__Bacteria|p__Acidobacteriota|c__Subgroup_22|o__Subgroup_22_unclassified	0	0	0	0	0	0	0	0	0	0	0	0	0	0	0	0	0	0	0	0	0	0	0	0	0	0	0	0	0	0.00435	0	0	0	0	0	0	0	0	0	0	0	0	0	0	0	0	0	0	0
d__Bacteria|p__Acidobacteriota|c__Subgroup_22|o__Subgroup_22_unclassified|f__Subgroup_22_unclassified	0	0	0	0	0	0	0	0	0	0	0	0	0	0	0	0	0	0	0	0	0	0	0	0	0	0	0	0	0	0.00435	0	0	0	0	0	0	0	0	0	0	0	0	0	0	0	0	0	0	0
d__Bacteria|p__Acidobacteriota|c__Subgroup_22|o__Subgroup_22_unclassified|f__Subgroup_22_unclassified|g__Subgroup_22_unclassified	0	0	0	0	0	0	0	0	0	0	0	0	0	0	0	0	0	0	0	0	0	0	0	0	0	0	0	0	0	0.00435	0	0	0	0	0	0	0	0	0	0	0	0	0	0	0	0	0	0	0
d__Bacteria|p__Acidobacteriota|c__Subgroup_22|o__Subgroup_22_unclassified|f__Subgroup_22_unclassified|g__Subgroup_22_unclassified|s__Subgroup_22_unclassified	0	0	0	0	0	0	0	0	0	0	0	0	0	0	0	0	0	0	0	0	0	0	0	0	0	0	0	0	0	0.00435	0	0	0	0	0	0	0	0	0	0	0	0	0	0	0	0	0	0	0
d__Bacteria|p__Acidobacteriota|c__Subgroup_25	0	0	0	0	0	0	0	0	0	0	0	0	0	0	0	0	0	0	0	0	0	0	0	0	0	0	0	0	0	0	0	0	0	0	0	0	0	0	0	0	0	0	0	0	0	0	0	0	0
d__Bacteria|p__Acidobacteriota|c__Subgroup_25|o__Subgroup_25_unclassified	0	0	0	0	0	0	0	0	0	0	0	0	0	0	0	0	0	0	0	0	0	0	0	0	0	0	0	0	0	0	0	0	0	0	0	0	0	0	0	0	0	0	0	0	0	0	0	0	0
d__Bacteria|p__Acidobacteriota|c__Subgroup_25|o__Subgroup_25_unclassified|f__Subgroup_25_unclassified	0	0	0	0	0	0	0	0	0	0	0	0	0	0	0	0	0	0	0	0	0	0	0	0	0	0	0	0	0	0	0	0	0	0	0	0	0	0	0	0	0	0	0	0	0	0	0	0	0
d__Bacteria|p__Acidobacteriota|c__Subgroup_25|o__Subgroup_25_unclassified|f__Subgroup_25_unclassified|g__Subgroup_25_unclassified	0	0	0	0	0	0	0	0	0	0	0	0	0	0	0	0	0	0	0	0	0	0	0	0	0	0	0	0	0	0	0	0	0	0	0	0	0	0	0	0	0	0	0	0	0	0	0	0	0
d__Bacteria|p__Acidobacteriota|c__Subgroup_25|o__Subgroup_25_unclassified|f__Subgroup_25_unclassified|g__Subgroup_25_unclassified|s__Subgroup_25_unclassified	0	0	0	0	0	0	0	0	0	0	0	0	0	0	0	0	0	0	0	0	0	0	0	0	0	0	0	0	0	0	0	0	0	0	0	0	0	0	0	0	0	0	0	0	0	0	0	0	0
d__Bacteria|p__Acidobacteriota|c__Subgroup_5	0	0	0	0	0	0	0	0	0	0	0	0	0	0	0	0	0	0	0	0	0	0	0	0	0	0	0	0	0	0	0	0	0	0	0	0	0	0	0	0	0	0	0	0	0	0	0	0	0
d__Bacteria|p__Acidobacteriota|c__Subgroup_5|o__Subgroup_5_unclassified	0	0	0	0	0	0	0	0	0	0	0	0	0	0	0	0	0	0	0	0	0	0	0	0	0	0	0	0	0	0	0	0	0	0	0	0	0	0	0	0	0	0	0	0	0	0	0	0	0
d__Bacteria|p__Acidobacteriota|c__Subgroup_5|o__Subgroup_5_unclassified|f__Subgroup_5_unclassified	0	0	0	0	0	0	0	0	0	0	0	0	0	0	0	0	0	0	0	0	0	0	0	0	0	0	0	0	0	0	0	0	0	0	0	0	0	0	0	0	0	0	0	0	0	0	0	0	0
d__Bacteria|p__Acidobacteriota|c__Subgroup_5|o__Subgroup_5_unclassified|f__Subgroup_5_unclassified|g__Subgroup_5_unclassified	0	0	0	0	0	0	0	0	0	0	0	0	0	0	0	0	0	0	0	0	0	0	0	0	0	0	0	0	0	0	0	0	0	0	0	0	0	0	0	0	0	0	0	0	0	0	0	0	0
d__Bacteria|p__Acidobacteriota|c__Subgroup_5|o__Subgroup_5_unclassified|f__Subgroup_5_unclassified|g__Subgroup_5_unclassified|s__Subgroup_5_unclassified	0	0	0	0	0	0	0	0	0	0	0	0	0	0	0	0	0	0	0	0	0	0	0	0	0	0	0	0	0	0	0	0	0	0	0	0	0	0	0	0	0	0	0	0	0	0	0	0	0
d__Bacteria|p__Acidobacteriota|c__Vicinamibacteria	0	0	0.05961	0.83697	0	0	0	0	0	0	0	0	0	0	0	0	0	0	0	0	0	0	0	0.06893	0	0	0	0	0	0.05515	0.04507	0.05045	0	0.01614	0	0	0	0	0.07001	0	0.00836	0.79813	0.01345	0	0	0	0	0.78136	0
d__Bacteria|p__Acidobacteriota|c__Vicinamibacteria|o__Subgroup_17	0	0	0	0	0	0	0	0	0	0	0	0	0	0	0	0	0	0	0	0	0	0	0	0	0	0	0	0	0	0	0	0	0	0.00269	0	0	0	0	0	0	0	0	0.01345	0	0	0	0	0	0
d__Bacteria|p__Acidobacteriota|c__Vicinamibacteria|o__Subgroup_17|f__Subgroup_17_unclassified	0	0	0	0	0	0	0	0	0	0	0	0	0	0	0	0	0	0	0	0	0	0	0	0	0	0	0	0	0	0	0	0	0	0.00269	0	0	0	0	0	0	0	0	0.01345	0	0	0	0	0	0
d__Bacteria|p__Acidobacteriota|c__Vicinamibacteria|o__Subgroup_17|f__Subgroup_17_unclassified|g__Subgroup_17_unclassified	0	0	0	0	0	0	0	0	0	0	0	0	0	0	0	0	0	0	0	0	0	0	0	0	0	0	0	0	0	0	0	0	0	0.00269	0	0	0	0	0	0	0	0	0.01345	0	0	0	0	0	0
d__Bacteria|p__Acidobacteriota|c__Vicinamibacteria|o__Subgroup_17|f__Subgroup_17_unclassified|g__Subgroup_17_unclassified|s__Subgroup_17_unclassified	0	0	0	0	0	0	0	0	0	0	0	0	0	0	0	0	0	0	0	0	0	0	0	0	0	0	0	0	0	0	0	0	0	0.00269	0	0	0	0	0	0	0	0	0.01345	0	0	0	0	0	0
d__Bacteria|p__Acidobacteriota|c__Vicinamibacteria|o__Subgroup_9	0	0	0	0	0	0	0	0	0	0	0	0	0	0	0	0	0	0	0	0	0	0	0	0	0	0	0	0	0	0	0	0	0	0	0	0	0	0	0	0	0.00836	0	0	0	0	0	0	0	0
d__Bacteria|p__Acidobacteriota|c__Vicinamibacteria|o__Subgroup_9|f__Subgroup_9_unclassified	0	0	0	0	0	0	0	0	0	0	0	0	0	0	0	0	0	0	0	0	0	0	0	0	0	0	0	0	0	0	0	0	0	0	0	0	0	0	0	0	0.00836	0	0	0	0	0	0	0	0
d__Bacteria|p__Acidobacteriota|c__Vicinamibacteria|o__Subgroup_9|f__Subgroup_9_unclassified|g__Subgroup_9_unclassified	0	0	0	0	0	0	0	0	0	0	0	0	0	0	0	0	0	0	0	0	0	0	0	0	0	0	0	0	0	0	0	0	0	0	0	0	0	0	0	0	0.00836	0	0	0	0	0	0	0	0
d__Bacteria|p__Acidobacteriota|c__Vicinamibacteria|o__Subgroup_9|f__Subgroup_9_unclassified|g__Subgroup_9_unclassified|s__Subgroup_9_unclassified	0	0	0	0	0	0	0	0	0	0	0	0	0	0	0	0	0	0	0	0	0	0	0	0	0	0	0	0	0	0	0	0	0	0	0	0	0	0	0	0	0.00836	0	0	0	0	0	0	0	0
d__Bacteria|p__Acidobacteriota|c__Vicinamibacteria|o__Vicinamibacterales	0	0	0.05961	0.83697	0	0	0	0	0	0	0	0	0	0	0	0	0	0	0	0	0	0	0	0.06893	0	0	0	0	0	0.05515	0.04507	0.05045	0	0.01345	0	0	0	0	0.07001	0	0	0.79813	0	0	0	0	0	0.78136	0
d__Bacteria|p__Acidobacteriota|c__Vicinamibacteria|o__Vicinamibacterales|f__Vicinamibacteraceae	0	0	0	0	0	0	0	0	0	0	0	0	0	0	0	0	0	0	0	0	0	0	0	0	0	0	0	0	0	0.03338	0.0373	0.02943	0	0.00538	0	0	0	0	0.07001	0	0	0	0	0	0	0	0	0	0
d__Bacteria|p__Acidobacteriota|c__Vicinamibacteria|o__Vicinamibacterales|f__Vicinamibacteraceae|g__Luteitalea	0	0	0	0	0	0	0	0	0	0	0	0	0	0	0	0	0	0	0	0	0	0	0	0	0	0	0	0	0	0	0	0	0	0	0	0	0	0	0	0	0	0	0	0	0	0	0	0	0
d__Bacteria|p__Acidobacteriota|c__Vicinamibacteria|o__Vicinamibacterales|f__Vicinamibacteraceae|g__Luteitalea|s__Luteitalea_unclassified	0	0	0	0	0	0	0	0	0	0	0	0	0	0	0	0	0	0	0	0	0	0	0	0	0	0	0	0	0	0	0	0	0	0	0	0	0	0	0	0	0	0	0	0	0	0	0	0	0
d__Bacteria|p__Acidobacteriota|c__Vicinamibacteria|o__Vicinamibacterales|f__Vicinamibacteraceae|g__Vicinamibacteraceae_unclassified	0	0	0	0	0	0	0	0	0	0	0	0	0	0	0	0	0	0	0	0	0	0	0	0	0	0	0	0	0	0.03338	0.0373	0.02943	0	0.00538	0	0	0	0	0.07001	0	0	0	0	0	0	0	0	0	0
d__Bacteria|p__Acidobacteriota|c__Vicinamibacteria|o__Vicinamibacterales|f__Vicinamibacteraceae|g__Vicinamibacteraceae_unclassified|s__Vicinamibacteraceae_unclassified	0	0	0	0	0	0	0	0	0	0	0	0	0	0	0	0	0	0	0	0	0	0	0	0	0	0	0	0	0	0.03338	0.0373	0.02943	0	0.00538	0	0	0	0	0.07001	0	0	0	0	0	0	0	0	0	0
d__Bacteria|p__Acidobacteriota|c__Vicinamibacteria|o__Vicinamibacterales|f__Vicinamibacterales_unclassified	0	0	0.05961	0.83697	0	0	0	0	0	0	0	0	0	0	0	0	0	0	0	0	0	0	0	0.06893	0	0	0	0	0	0.02177	0.00777	0.02102	0	0.00807	0	0	0	0	0	0	0	0.79813	0	0	0	0	0	0.78136	0
d__Bacteria|p__Acidobacteriota|c__Vicinamibacteria|o__Vicinamibacterales|f__Vicinamibacterales_unclassified|g__Vicinamibacterales_unclassified	0	0	0.05961	0.83697	0	0	0	0	0	0	0	0	0	0	0	0	0	0	0	0	0	0	0	0.06893	0	0	0	0	0	0.02177	0.00777	0.02102	0	0.00807	0	0	0	0	0	0	0	0.79813	0	0	0	0	0	0.78136	0
d__Bacteria|p__Acidobacteriota|c__Vicinamibacteria|o__Vicinamibacterales|f__Vicinamibacterales_unclassified|g__Vicinamibacterales_unclassified|s__Vicinamibacterales_unclassified	0	0	0.05961	0.83697	0	0	0	0	0	0	0	0	0	0	0	0	0	0	0	0	0	0	0	0.06893	0	0	0	0	0	0.02177	0.00777	0.02102	0	0.00807	0	0	0	0	0	0	0	0.79813	0	0	0	0	0	0.78136	0
d__Bacteria|p__Actinobacteriota	6.46217	5.52795	0.6869	1.8957	0.18073	0.075	0.28722	0.30832	0.38167	0.14132	0.73722	1.55095	0.45666	0.42427	0.4704	1.04231	10.3558	4.24613	0.44846	0.9064	0.4236	0.54622	8.26338	2.73339	1.24422	15.3227	2.66497	0.47953	0.98952	1.56602	0.50506	0.9824	0.11812	0.15461	0.24242	0.6229	1.18501	1.50619	1.31468	0.25872	0.86093	1.75027	1.34171	0.96872	0.14595	1.25943	1.11547	1.93822	1.11971
d__Bacteria|p__Actinobacteriota|c__Acidimicrobiia	0	0	0	0	0	0	0	0	0	0	0	0	0	0	0	0.06242	0	0	0	0	0.00338	0	0.01263	0.01326	0.00711	0	0	0	0	0.00435	0	0.0028	0	0.00403	0	0	0	0	0	0.01308	0	0.00933	0	0	0	0	0	0	0
d__Bacteria|p__Actinobacteriota|c__Acidimicrobiia|o__Acidimicrobiales	0	0	0	0	0	0	0	0	0	0	0	0	0	0	0	0	0	0	0	0	0	0	0	0	0	0	0	0	0	0	0	0.0028	0	0	0	0	0	0	0	0	0	0	0	0	0	0	0	0	0
d__Bacteria|p__Actinobacteriota|c__Acidimicrobiia|o__Acidimicrobiales|f__Acidimicrobiales_unclassified	0	0	0	0	0	0	0	0	0	0	0	0	0	0	0	0	0	0	0	0	0	0	0	0	0	0	0	0	0	0	0	0.0028	0	0	0	0	0	0	0	0	0	0	0	0	0	0	0	0	0
d__Bacteria|p__Actinobacteriota|c__Acidimicrobiia|o__Acidimicrobiales|f__Acidimicrobiales_unclassified|g__Acidimicrobiales_unclassified	0	0	0	0	0	0	0	0	0	0	0	0	0	0	0	0	0	0	0	0	0	0	0	0	0	0	0	0	0	0	0	0.0028	0	0	0	0	0	0	0	0	0	0	0	0	0	0	0	0	0
d__Bacteria|p__Actinobacteriota|c__Acidimicrobiia|o__Acidimicrobiales|f__Acidimicrobiales_unclassified|g__Acidimicrobiales_unclassified|s__Acidimicrobiales_unclassified	0	0	0	0	0	0	0	0	0	0	0	0	0	0	0	0	0	0	0	0	0	0	0	0	0	0	0	0	0	0	0	0.0028	0	0	0	0	0	0	0	0	0	0	0	0	0	0	0	0	0
d__Bacteria|p__Actinobacteriota|c__Acidimicrobiia|o__Acidimicrobiia_unclassified	0	0	0	0	0	0	0	0	0	0	0	0	0	0	0	0	0	0	0	0	0	0	0	0	0	0	0	0	0	0	0	0	0	0	0	0	0	0	0	0	0	0	0	0	0	0	0	0	0
d__Bacteria|p__Actinobacteriota|c__Acidimicrobiia|o__Acidimicrobiia_unclassified|f__Acidimicrobiia_unclassified	0	0	0	0	0	0	0	0	0	0	0	0	0	0	0	0	0	0	0	0	0	0	0	0	0	0	0	0	0	0	0	0	0	0	0	0	0	0	0	0	0	0	0	0	0	0	0	0	0
d__Bacteria|p__Actinobacteriota|c__Acidimicrobiia|o__Acidimicrobiia_unclassified|f__Acidimicrobiia_unclassified|g__Acidimicrobiia_unclassified	0	0	0	0	0	0	0	0	0	0	0	0	0	0	0	0	0	0	0	0	0	0	0	0	0	0	0	0	0	0	0	0	0	0	0	0	0	0	0	0	0	0	0	0	0	0	0	0	0
d__Bacteria|p__Actinobacteriota|c__Acidimicrobiia|o__Acidimicrobiia_unclassified|f__Acidimicrobiia_unclassified|g__Acidimicrobiia_unclassified|s__Acidimicrobiia_unclassified	0	0	0	0	0	0	0	0	0	0	0	0	0	0	0	0	0	0	0	0	0	0	0	0	0	0	0	0	0	0	0	0	0	0	0	0	0	0	0	0	0	0	0	0	0	0	0	0	0
d__Bacteria|p__Actinobacteriota|c__Acidimicrobiia|o__Actinomarinales	0	0	0	0	0	0	0	0	0	0	0	0	0	0	0	0.06242	0	0	0	0	0	0	0.01263	0.01326	0	0	0	0	0	0.00435	0	0	0	0	0	0	0	0	0	0	0	0	0	0	0	0	0	0	0
d__Bacteria|p__Actinobacteriota|c__Acidimicrobiia|o__Actinomarinales|f__Actinomarinales_unclassified	0	0	0	0	0	0	0	0	0	0	0	0	0	0	0	0.06242	0	0	0	0	0	0	0.01263	0.01326	0	0	0	0	0	0.00435	0	0	0	0	0	0	0	0	0	0	0	0	0	0	0	0	0	0	0
d__Bacteria|p__Actinobacteriota|c__Acidimicrobiia|o__Actinomarinales|f__Actinomarinales_unclassified|g__Actinomarinales_unclassified	0	0	0	0	0	0	0	0	0	0	0	0	0	0	0	0.06242	0	0	0	0	0	0	0.01263	0.01326	0	0	0	0	0	0.00435	0	0	0	0	0	0	0	0	0	0	0	0	0	0	0	0	0	0	0
d__Bacteria|p__Actinobacteriota|c__Acidimicrobiia|o__Actinomarinales|f__Actinomarinales_unclassified|g__Actinomarinales_unclassified|s__Actinomarinales_unclassified	0	0	0	0	0	0	0	0	0	0	0	0	0	0	0	0.06242	0	0	0	0	0	0	0.01263	0.01326	0	0	0	0	0	0.00435	0	0	0	0	0	0	0	0	0	0	0	0	0	0	0	0	0	0	0
d__Bacteria|p__Actinobacteriota|c__Acidimicrobiia|o__IMCC26256	0	0	0	0	0	0	0	0	0	0	0	0	0	0	0	0	0	0	0	0	0	0	0	0	0	0	0	0	0	0	0	0	0	0	0	0	0	0	0	0	0	0	0	0	0	0	0	0	0
d__Bacteria|p__Actinobacteriota|c__Acidimicrobiia|o__IMCC26256|f__IMCC26256_unclassified	0	0	0	0	0	0	0	0	0	0	0	0	0	0	0	0	0	0	0	0	0	0	0	0	0	0	0	0	0	0	0	0	0	0	0	0	0	0	0	0	0	0	0	0	0	0	0	0	0
d__Bacteria|p__Actinobacteriota|c__Acidimicrobiia|o__IMCC26256|f__IMCC26256_unclassified|g__IMCC26256_unclassified	0	0	0	0	0	0	0	0	0	0	0	0	0	0	0	0	0	0	0	0	0	0	0	0	0	0	0	0	0	0	0	0	0	0	0	0	0	0	0	0	0	0	0	0	0	0	0	0	0
d__Bacteria|p__Actinobacteriota|c__Acidimicrobiia|o__IMCC26256|f__IMCC26256_unclassified|g__IMCC26256_unclassified|s__IMCC26256_unclassified	0	0	0	0	0	0	0	0	0	0	0	0	0	0	0	0	0	0	0	0	0	0	0	0	0	0	0	0	0	0	0	0	0	0	0	0	0	0	0	0	0	0	0	0	0	0	0	0	0
d__Bacteria|p__Actinobacteriota|c__Acidimicrobiia|o__Microtrichales	0	0	0	0	0	0	0	0	0	0	0	0	0	0	0	0	0	0	0	0	0.00338	0	0	0	0.00711	0	0	0	0	0	0	0	0	0.00403	0	0	0	0	0	0.01308	0	0.00933	0	0	0	0	0	0	0
d__Bacteria|p__Actinobacteriota|c__Acidimicrobiia|o__Microtrichales|f__Iamiaceae	0	0	0	0	0	0	0	0	0	0	0	0	0	0	0	0	0	0	0	0	0	0	0	0	0	0	0	0	0	0	0	0	0	0	0	0	0	0	0	0	0	0	0	0	0	0	0	0	0
d__Bacteria|p__Actinobacteriota|c__Acidimicrobiia|o__Microtrichales|f__Iamiaceae|g__Iamia	0	0	0	0	0	0	0	0	0	0	0	0	0	0	0	0	0	0	0	0	0	0	0	0	0	0	0	0	0	0	0	0	0	0	0	0	0	0	0	0	0	0	0	0	0	0	0	0	0
d__Bacteria|p__Actinobacteriota|c__Acidimicrobiia|o__Microtrichales|f__Iamiaceae|g__Iamia|s__Iamia_unclassified	0	0	0	0	0	0	0	0	0	0	0	0	0	0	0	0	0	0	0	0	0	0	0	0	0	0	0	0	0	0	0	0	0	0	0	0	0	0	0	0	0	0	0	0	0	0	0	0	0
d__Bacteria|p__Actinobacteriota|c__Acidimicrobiia|o__Microtrichales|f__Ilumatobacteraceae	0	0	0	0	0	0	0	0	0	0	0	0	0	0	0	0	0	0	0	0	0	0	0	0	0.00711	0	0	0	0	0	0	0	0	0.00403	0	0	0	0	0	0.00727	0	0	0	0	0	0	0	0	0
d__Bacteria|p__Actinobacteriota|c__Acidimicrobiia|o__Microtrichales|f__Ilumatobacteraceae|g__CL500-29_marine_group	0	0	0	0	0	0	0	0	0	0	0	0	0	0	0	0	0	0	0	0	0	0	0	0	0	0	0	0	0	0	0	0	0	0.00403	0	0	0	0	0	0	0	0	0	0	0	0	0	0	0
d__Bacteria|p__Actinobacteriota|c__Acidimicrobiia|o__Microtrichales|f__Ilumatobacteraceae|g__CL500-29_marine_group|s__CL500-29_marine_group_unclassified	0	0	0	0	0	0	0	0	0	0	0	0	0	0	0	0	0	0	0	0	0	0	0	0	0	0	0	0	0	0	0	0	0	0.00403	0	0	0	0	0	0	0	0	0	0	0	0	0	0	0
d__Bacteria|p__Actinobacteriota|c__Acidimicrobiia|o__Microtrichales|f__Ilumatobacteraceae|g__Ilumatobacter	0	0	0	0	0	0	0	0	0	0	0	0	0	0	0	0	0	0	0	0	0	0	0	0	0	0	0	0	0	0	0	0	0	0	0	0	0	0	0	0	0	0	0	0	0	0	0	0	0
d__Bacteria|p__Actinobacteriota|c__Acidimicrobiia|o__Microtrichales|f__Ilumatobacteraceae|g__Ilumatobacteraceae_unclassified	0	0	0	0	0	0	0	0	0	0	0	0	0	0	0	0	0	0	0	0	0	0	0	0	0.00711	0	0	0	0	0	0	0	0	0	0	0	0	0	0	0.00727	0	0	0	0	0	0	0	0	0
d__Bacteria|p__Actinobacteriota|c__Acidimicrobiia|o__Microtrichales|f__Ilumatobacteraceae|g__Ilumatobacteraceae_unclassified|s__Ilumatobacteraceae_unclassified	0	0	0	0	0	0	0	0	0	0	0	0	0	0	0	0	0	0	0	0	0	0	0	0	0.00711	0	0	0	0	0	0	0	0	0	0	0	0	0	0	0.00727	0	0	0	0	0	0	0	0	0
d__Bacteria|p__Actinobacteriota|c__Acidimicrobiia|o__Microtrichales|f__Ilumatobacteraceae|g__Ilumatobacter|s__Ilumatobacter_unclassified	0	0	0	0	0	0	0	0	0	0	0	0	0	0	0	0	0	0	0	0	0	0	0	0	0	0	0	0	0	0	0	0	0	0	0	0	0	0	0	0	0	0	0	0	0	0	0	0	0
d__Bacteria|p__Actinobacteriota|c__Acidimicrobiia|o__Microtrichales|f__Microtrichaceae	0	0	0	0	0	0	0	0	0	0	0	0	0	0	0	0	0	0	0	0	0	0	0	0	0	0	0	0	0	0	0	0	0	0	0	0	0	0	0	0	0	0.00933	0	0	0	0	0	0	0
d__Bacteria|p__Actinobacteriota|c__Acidimicrobiia|o__Microtrichales|f__Microtrichaceae|g__IMCC26207	0	0	0	0	0	0	0	0	0	0	0	0	0	0	0	0	0	0	0	0	0	0	0	0	0	0	0	0	0	0	0	0	0	0	0	0	0	0	0	0	0	0.00933	0	0	0	0	0	0	0
d__Bacteria|p__Actinobacteriota|c__Acidimicrobiia|o__Microtrichales|f__Microtrichaceae|g__IMCC26207|s__IMCC26207_unclassified	0	0	0	0	0	0	0	0	0	0	0	0	0	0	0	0	0	0	0	0	0	0	0	0	0	0	0	0	0	0	0	0	0	0	0	0	0	0	0	0	0	0.00933	0	0	0	0	0	0	0
d__Bacteria|p__Actinobacteriota|c__Acidimicrobiia|o__Microtrichales|f__Microtrichales_unclassified	0	0	0	0	0	0	0	0	0	0	0	0	0	0	0	0	0	0	0	0	0.00338	0	0	0	0	0	0	0	0	0	0	0	0	0	0	0	0	0	0	0.00581	0	0	0	0	0	0	0	0	0
d__Bacteria|p__Actinobacteriota|c__Acidimicrobiia|o__Microtrichales|f__Microtrichales_unclassified|g__Microtrichales_unclassified	0	0	0	0	0	0	0	0	0	0	0	0	0	0	0	0	0	0	0	0	0.00338	0	0	0	0	0	0	0	0	0	0	0	0	0	0	0	0	0	0	0.00581	0	0	0	0	0	0	0	0	0
d__Bacteria|p__Actinobacteriota|c__Acidimicrobiia|o__Microtrichales|f__Microtrichales_unclassified|g__Microtrichales_unclassified|s__Microtrichales_unclassified	0	0	0	0	0	0	0	0	0	0	0	0	0	0	0	0	0	0	0	0	0.00338	0	0	0	0	0	0	0	0	0	0	0	0	0	0	0	0	0	0	0.00581	0	0	0	0	0	0	0	0	0
d__Bacteria|p__Actinobacteriota|c__Actinobacteria	5.39877	3.25716	0.55917	1.06589	0.01064	0.01837	0.20562	0.22368	0.31552	0.10829	0.26371	0.91017	0.1989	0.07768	0.15308	0.45023	9.61146	3.9433	0.03952	0.16345	0.04725	0.09243	8.04874	2.34101	0.94738	14.6079	2.56275	0.45466	0.74923	1.51378	0.19426	0.80582	0.07662	0.09142	0.1649	0.40785	0.41997	0.52138	1.10723	0.20349	0.83586	1.14818	1.01385	0.96872	0.04575	0.8339	0.29259	0.67369	0.27868
d__Bacteria|p__Actinobacteriota|c__Actinobacteria|o__Actinomycetales	3.58282	0.97218	0.1476	0.46498	0	0.01225	0.1583	0.18741	0.00848	0	0.0077	0.05773	0	0	0	0.00757	0	0.08558	0.01031	0.0066	0.01181	0.0084	1.39511	0	0.07288	0	0.34266	0.0373	0.03973	0	0.14141	0.00701	0.00479	0	0.08457	0.18539	0	0.03288	0.55231	0.02035	0	0	0.18327	0.15698	0.03486	0.35538	0.16458	0.13529	0.14852
d__Bacteria|p__Actinobacteriota|c__Actinobacteria|o__Actinomycetales|f__Actinomycetaceae	3.58282	0.97218	0.1476	0.46498	0	0.01225	0.1583	0.18741	0.00848	0	0.0077	0.05773	0	0	0	0.00757	0	0.08558	0.01031	0.0066	0.01181	0.0084	1.39511	0	0.07288	0	0.34266	0.0373	0.03973	0	0.14141	0.00701	0.00479	0	0.08457	0.18539	0	0.03288	0.55231	0.02035	0	0	0.18327	0.15698	0.03486	0.35538	0.16458	0.13529	0.14852
d__Bacteria|p__Actinobacteriota|c__Actinobacteria|o__Actinomycetales|f__Actinomycetaceae|g__Actinomyces	3.58282	0.97218	0.1476	0.06438	0	0	0.1583	0.18136	0.00848	0	0.0077	0.05773	0	0	0	0.00757	0	0.08558	0.01031	0.0066	0.01181	0.0084	1.39511	0	0.07288	0	0.33978	0.0373	0.03973	0	0.14141	0	0.00479	0	0.08457	0.18539	0	0.03288	0.55231	0.02035	0	0	0.18327	0.15698	0.03486	0.35538	0.16458	0.13529	0.14852
d__Bacteria|p__Actinobacteriota|c__Actinobacteria|o__Actinomycetales|f__Actinomycetaceae|g__Actinomyces|s__Actinomyces_unclassified	3.58282	0.97218	0.1476	0.06438	0	0	0.1583	0.18136	0.00848	0	0.0077	0.05773	0	0	0	0.00757	0	0.08558	0.01031	0.0066	0.01181	0.0084	1.39511	0	0.07288	0	0.33978	0.0373	0.03973	0	0.14141	0	0.00479	0	0.08457	0.18539	0	0.03288	0.55231	0.02035	0	0	0.18327	0.15698	0.03486	0.35538	0.16458	0.13529	0.14852
d__Bacteria|p__Actinobacteriota|c__Actinobacteria|o__Actinomycetales|f__Actinomycetaceae|g__F0332	0	0	0	0	0	0	0	0	0	0	0	0	0	0	0	0	0	0	0	0	0	0	0	0	0	0	0.00288	0	0	0	0	0	0	0	0	0	0	0	0	0	0	0	0	0	0	0	0	0	0
d__Bacteria|p__Actinobacteriota|c__Actinobacteria|o__Actinomycetales|f__Actinomycetaceae|g__F0332|s__F0332_unclassified	0	0	0	0	0	0	0	0	0	0	0	0	0	0	0	0	0	0	0	0	0	0	0	0	0	0	0.00288	0	0	0	0	0	0	0	0	0	0	0	0	0	0	0	0	0	0	0	0	0	0
d__Bacteria|p__Actinobacteriota|c__Actinobacteria|o__Actinomycetales|f__Actinomycetaceae|g__Flaviflexus	0	0	0	0.4006	0	0	0	0	0	0	0	0	0	0	0	0	0	0	0	0	0	0	0	0	0	0	0	0	0	0	0	0	0	0	0	0	0	0	0	0	0	0	0	0	0	0	0	0	0
d__Bacteria|p__Actinobacteriota|c__Actinobacteria|o__Actinomycetales|f__Actinomycetaceae|g__Flaviflexus|s__Flaviflexus_unclassified	0	0	0	0.4006	0	0	0	0	0	0	0	0	0	0	0	0	0	0	0	0	0	0	0	0	0	0	0	0	0	0	0	0	0	0	0	0	0	0	0	0	0	0	0	0	0	0	0	0	0
d__Bacteria|p__Actinobacteriota|c__Actinobacteria|o__Actinomycetales|f__Actinomycetaceae|g__Mobiluncus	0	0	0	0	0	0.01225	0	0.00605	0	0	0	0	0	0	0	0	0	0	0	0	0	0	0	0	0	0	0	0	0	0	0	0.00701	0	0	0	0	0	0	0	0	0	0	0	0	0	0	0	0	0
d__Bacteria|p__Actinobacteriota|c__Actinobacteria|o__Actinomycetales|f__Actinomycetaceae|g__Mobiluncus|s__Mobiluncus_unclassified	0	0	0	0	0	0.01225	0	0.00605	0	0	0	0	0	0	0	0	0	0	0	0	0	0	0	0	0	0	0	0	0	0	0	0.00701	0	0	0	0	0	0	0	0	0	0	0	0	0	0	0	0	0
d__Bacteria|p__Actinobacteriota|c__Actinobacteria|o__Bifidobacteriales	0	1.6889	0	0	0	0	0.01142	0	0.12553	0.06791	0.24831	0.75816	0.1989	0.07768	0.04305	0.16836	9.41633	3.77872	0.02921	0.15685	0.01519	0.06723	0	0.07954	0.15819	2.44639	0	0	0	0.01016	0	0.01261	0.02873	0.00941	0.01409	0.00742	0.29137	0.47597	0.10891	0.02907	0	0.03267	0.43715	0.54205	0	0.00623	0	0.03865	0
d__Bacteria|p__Actinobacteriota|c__Actinobacteria|o__Bifidobacteriales|f__Bifidobacteriaceae	0	1.6889	0	0	0	0	0.01142	0	0.12553	0.06791	0.24831	0.75816	0.1989	0.07768	0.04305	0.16836	9.41633	3.77872	0.02921	0.15685	0.01519	0.06723	0	0.07954	0.15819	2.44639	0	0	0	0.01016	0	0.01261	0.02873	0.00941	0.01409	0.00742	0.29137	0.47597	0.10891	0.02907	0	0.03267	0.43715	0.54205	0	0.00623	0	0.03865	0
d__Bacteria|p__Actinobacteriota|c__Actinobacteria|o__Bifidobacteriales|f__Bifidobacteriaceae|g__Alloscardovia	0	0	0	0	0	0	0	0	0	0	0	0	0	0	0	0	0	0	0	0	0	0	0	0	0	0	0	0	0	0	0	0	0	0	0	0	0	0	0	0	0	0	0	0.00939	0	0	0	0	0
d__Bacteria|p__Actinobacteriota|c__Actinobacteria|o__Bifidobacteriales|f__Bifidobacteriaceae|g__Alloscardovia|s__Alloscardovia_unclassified	0	0	0	0	0	0	0	0	0	0	0	0	0	0	0	0	0	0	0	0	0	0	0	0	0	0	0	0	0	0	0	0	0	0	0	0	0	0	0	0	0	0	0	0.00939	0	0	0	0	0
d__Bacteria|p__Actinobacteriota|c__Actinobacteria|o__Bifidobacteriales|f__Bifidobacteriaceae|g__Bifidobacterium	0	0	0	0	0	0	0.01142	0	0.12553	0.06791	0.24831	0.75816	0.1989	0.07768	0.04305	0.16836	9.41633	3.77872	0.02921	0.15685	0.01519	0.06723	0	0.07954	0.15819	2.44639	0	0	0	0.01016	0	0.01261	0.02873	0.00941	0.01409	0.00742	0.29137	0.47597	0.10891	0.02907	0	0.03267	0.43715	0.53266	0	0.00623	0	0.03865	0
d__Bacteria|p__Actinobacteriota|c__Actinobacteria|o__Bifidobacteriales|f__Bifidobacteriaceae|g__Bifidobacterium|s__Bifidobacterium_unclassified	0	0	0	0	0	0	0.01142	0	0.12553	0.06791	0.24831	0.75816	0.1989	0.07768	0.04305	0.16836	9.41633	3.77872	0.02921	0.15685	0.01519	0.06723	0	0.07954	0.15819	2.44639	0	0	0	0.01016	0	0.01261	0.02873	0.00941	0.01409	0.00742	0.29137	0.47597	0.10891	0.02907	0	0.03267	0.43715	0.53266	0	0.00623	0	0.03865	0
d__Bacteria|p__Actinobacteriota|c__Actinobacteria|o__Bifidobacteriales|f__Bifidobacteriaceae|g__Gardnerella	0	1.6889	0	0	0	0	0	0	0	0	0	0	0	0	0	0	0	0	0	0	0	0	0	0	0	0	0	0	0	0	0	0	0	0	0	0	0	0	0	0	0	0	0	0	0	0	0	0	0
d__Bacteria|p__Actinobacteriota|c__Actinobacteria|o__Bifidobacteriales|f__Bifidobacteriaceae|g__Gardnerella|s__Gardnerella_unclassified	0	1.6889	0	0	0	0	0	0	0	0	0	0	0	0	0	0	0	0	0	0	0	0	0	0	0	0	0	0	0	0	0	0	0	0	0	0	0	0	0	0	0	0	0	0	0	0	0	0	0
d__Bacteria|p__Actinobacteriota|c__Actinobacteria|o__Catenulisporales	0	0	0	0	0	0	0	0	0	0	0	0	0	0	0	0	0	0	0	0	0.0135	0	0	0	0	0	0	0	0	0	0	0	0	0	0	0	0	0	0	0	0	0	0	0	0	0	0	0	0
d__Bacteria|p__Actinobacteriota|c__Actinobacteria|o__Catenulisporales|f__Catenulisporaceae	0	0	0	0	0	0	0	0	0	0	0	0	0	0	0	0	0	0	0	0	0.0135	0	0	0	0	0	0	0	0	0	0	0	0	0	0	0	0	0	0	0	0	0	0	0	0	0	0	0	0
d__Bacteria|p__Actinobacteriota|c__Actinobacteria|o__Catenulisporales|f__Catenulisporaceae|g__Catenulispora	0	0	0	0	0	0	0	0	0	0	0	0	0	0	0	0	0	0	0	0	0.0135	0	0	0	0	0	0	0	0	0	0	0	0	0	0	0	0	0	0	0	0	0	0	0	0	0	0	0	0
d__Bacteria|p__Actinobacteriota|c__Actinobacteria|o__Catenulisporales|f__Catenulisporaceae|g__Catenulispora|s__Catenulispora_unclassified	0	0	0	0	0	0	0	0	0	0	0	0	0	0	0	0	0	0	0	0	0.0135	0	0	0	0	0	0	0	0	0	0	0	0	0	0	0	0	0	0	0	0	0	0	0	0	0	0	0	0
d__Bacteria|p__Actinobacteriota|c__Actinobacteria|o__Corynebacteriales	1.18609	0.34062	0.03122	0.32192	0.00532	0	0	0	0.15607	0.00734	0.00385	0.0558	0	0	0.04943	0.03405	0.12286	0.01756	0	0	0	0.00504	0.42927	0.12726	0.00355	0.0604	0.02448	0.06038	0.01324	0.23367	0.01399	0.06166	0.02873	0.0242	0.02678	0.19527	0.06674	0.01253	0.13484	0	0.12817	0.79346	0.13282	0	0	0.11067	0.03657	0.0497	0.04339
d__Bacteria|p__Actinobacteriota|c__Actinobacteria|o__Corynebacteriales|f__Corynebacteriaceae	1.11247	0.34062	0.03122	0.32192	0	0	0	0	0.15607	0.00734	0.00385	0.0558	0	0	0.04943	0.03405	0.05059	0.01756	0	0	0	0	0.42927	0.03712	0.00355	0.0604	0.02448	0.06038	0.01324	0.23367	0.00777	0.05746	0.02873	0.02017	0.02678	0.19527	0.06674	0.01253	0.13484	0	0.12817	0.67211	0.11601	0	0	0.11067	0.03657	0.0497	0.04339
d__Bacteria|p__Actinobacteriota|c__Actinobacteria|o__Corynebacteriales|f__Corynebacteriaceae|g__Corynebacterium	0	0.34062	0	0.25038	0	0	0	0	0.10348	0	0.00385	0.0558	0	0	0	0.03405	0	0	0	0	0	0	0	0.03712	0.00355	0.0604	0.02448	0	0.01324	0.23367	0.00777	0.05746	0.02554	0.01479	0.01691	0.19527	0.06674	0.00783	0.13484	0	0.12817	0	0.06221	0	0	0.10132	0.03657	0.0497	0.04339
d__Bacteria|p__Actinobacteriota|c__Actinobacteria|o__Corynebacteriales|f__Corynebacteriaceae|g__Corynebacterium|s__Corynebacterium_unclassified	0	0.34062	0	0.25038	0	0	0	0	0.10348	0	0.00385	0.0558	0	0	0	0.03405	0	0	0	0	0	0	0	0.03712	0.00355	0.0604	0.02448	0	0.01324	0.23367	0.00777	0.05746	0.02554	0.01479	0.01691	0.19527	0.06674	0.00783	0.13484	0	0.12817	0	0.06221	0	0	0.10132	0.03657	0.0497	0.04339
d__Bacteria|p__Actinobacteriota|c__Actinobacteria|o__Corynebacteriales|f__Corynebacteriaceae|g__Lawsonella	1.11247	0	0.03122	0.07154	0	0	0	0	0.05259	0.00734	0	0	0	0	0.04943	0	0.05059	0.01756	0	0	0	0	0.42927	0	0	0	0	0.06038	0	0	0	0	0.00319	0.00538	0.00987	0	0	0.0047	0	0	0	0.67211	0.0538	0	0	0.00935	0	0	0
d__Bacteria|p__Actinobacteriota|c__Actinobacteria|o__Corynebacteriales|f__Corynebacteriaceae|g__Lawsonella|s__Lawsonella_unclassified	1.11247	0	0.03122	0.07154	0	0	0	0	0.05259	0.00734	0	0	0	0	0.04943	0	0.05059	0.01756	0	0	0	0	0.42927	0	0	0	0	0.06038	0	0	0	0	0.00319	0.00538	0.00987	0	0	0.0047	0	0	0	0.67211	0.0538	0	0	0.00935	0	0	0
d__Bacteria|p__Actinobacteriota|c__Actinobacteria|o__Corynebacteriales|f__Dietziaceae	0	0	0	0	0	0	0	0	0	0	0	0	0	0	0	0	0	0	0	0	0	0	0	0	0	0	0	0	0	0	0	0	0	0	0	0	0	0	0	0	0	0	0	0	0	0	0	0	0
d__Bacteria|p__Actinobacteriota|c__Actinobacteria|o__Corynebacteriales|f__Dietziaceae|g__Dietzia	0	0	0	0	0	0	0	0	0	0	0	0	0	0	0	0	0	0	0	0	0	0	0	0	0	0	0	0	0	0	0	0	0	0	0	0	0	0	0	0	0	0	0	0	0	0	0	0	0
d__Bacteria|p__Actinobacteriota|c__Actinobacteria|o__Corynebacteriales|f__Dietziaceae|g__Dietzia|s__Dietzia_unclassified	0	0	0	0	0	0	0	0	0	0	0	0	0	0	0	0	0	0	0	0	0	0	0	0	0	0	0	0	0	0	0	0	0	0	0	0	0	0	0	0	0	0	0	0	0	0	0	0	0
d__Bacteria|p__Actinobacteriota|c__Actinobacteria|o__Corynebacteriales|f__Mycobacteriaceae	0.07362	0	0	0	0	0	0	0	0	0	0	0	0	0	0	0	0.053	0	0	0	0	0	0	0.09014	0	0	0	0	0	0	0	0	0	0.00403	0	0	0	0	0	0	0	0.00933	0.01681	0	0	0	0	0	0
d__Bacteria|p__Actinobacteriota|c__Actinobacteria|o__Corynebacteriales|f__Mycobacteriaceae|g__Mycobacterium	0.07362	0	0	0	0	0	0	0	0	0	0	0	0	0	0	0	0.053	0	0	0	0	0	0	0.09014	0	0	0	0	0	0	0	0	0	0.00403	0	0	0	0	0	0	0	0.00933	0.01681	0	0	0	0	0	0
d__Bacteria|p__Actinobacteriota|c__Actinobacteria|o__Corynebacteriales|f__Mycobacteriaceae|g__Mycobacterium|s__Mycobacterium_unclassified	0.07362	0	0	0	0	0	0	0	0	0	0	0	0	0	0	0	0.053	0	0	0	0	0	0	0.09014	0	0	0	0	0	0	0	0	0	0.00403	0	0	0	0	0	0	0	0.00933	0.01681	0	0	0	0	0	0
d__Bacteria|p__Actinobacteriota|c__Actinobacteria|o__Corynebacteriales|f__Nocardiaceae	0	0	0	0	0.00532	0	0	0	0	0	0	0	0	0	0	0	0.01927	0	0	0	0	0.00504	0	0	0	0	0	0	0	0	0	0.0042	0	0	0	0	0	0	0	0	0	0.11202	0	0	0	0	0	0	0
d__Bacteria|p__Actinobacteriota|c__Actinobacteria|o__Corynebacteriales|f__Nocardiaceae|g__Gordonia	0	0	0	0	0.00532	0	0	0	0	0	0	0	0	0	0	0	0.01927	0	0	0	0	0	0	0	0	0	0	0	0	0	0	0.0042	0	0	0	0	0	0	0	0	0	0	0	0	0	0	0	0	0
d__Bacteria|p__Actinobacteriota|c__Actinobacteria|o__Corynebacteriales|f__Nocardiaceae|g__Gordonia|s__Gordonia_unclassified	0	0	0	0	0.00532	0	0	0	0	0	0	0	0	0	0	0	0.01927	0	0	0	0	0	0	0	0	0	0	0	0	0	0	0.0042	0	0	0	0	0	0	0	0	0	0	0	0	0	0	0	0	0
d__Bacteria|p__Actinobacteriota|c__Actinobacteria|o__Corynebacteriales|f__Nocardiaceae|g__Nocardia	0	0	0	0	0	0	0	0	0	0	0	0	0	0	0	0	0	0	0	0	0	0	0	0	0	0	0	0	0	0	0	0	0	0	0	0	0	0	0	0	0	0	0	0	0	0	0	0	0
d__Bacteria|p__Actinobacteriota|c__Actinobacteria|o__Corynebacteriales|f__Nocardiaceae|g__Nocardia|s__Nocardia_unclassified	0	0	0	0	0	0	0	0	0	0	0	0	0	0	0	0	0	0	0	0	0	0	0	0	0	0	0	0	0	0	0	0	0	0	0	0	0	0	0	0	0	0	0	0	0	0	0	0	0
d__Bacteria|p__Actinobacteriota|c__Actinobacteria|o__Corynebacteriales|f__Nocardiaceae|g__Rhodococcus	0	0	0	0	0	0	0	0	0	0	0	0	0	0	0	0	0	0	0	0	0	0.00504	0	0	0	0	0	0	0	0	0	0	0	0	0	0	0	0	0	0	0	0.11202	0	0	0	0	0	0	0
d__Bacteria|p__Actinobacteriota|c__Actinobacteria|o__Corynebacteriales|f__Nocardiaceae|g__Rhodococcus|s__Rhodococcus_unclassified	0	0	0	0	0	0	0	0	0	0	0	0	0	0	0	0	0	0	0	0	0	0.00504	0	0	0	0	0	0	0	0	0	0	0	0	0	0	0	0	0	0	0	0.11202	0	0	0	0	0	0	0
d__Bacteria|p__Actinobacteriota|c__Actinobacteria|o__Corynebacteriales|f__Tsukamurellaceae	0	0	0	0	0	0	0	0	0	0	0	0	0	0	0	0	0	0	0	0	0	0	0	0	0	0	0	0	0	0	0.00622	0	0	0	0	0	0	0	0	0	0	0	0	0	0	0	0	0	0
d__Bacteria|p__Actinobacteriota|c__Actinobacteria|o__Corynebacteriales|f__Tsukamurellaceae|g__Tsukamurella	0	0	0	0	0	0	0	0	0	0	0	0	0	0	0	0	0	0	0	0	0	0	0	0	0	0	0	0	0	0	0.00622	0	0	0	0	0	0	0	0	0	0	0	0	0	0	0	0	0	0
d__Bacteria|p__Actinobacteriota|c__Actinobacteria|o__Corynebacteriales|f__Tsukamurellaceae|g__Tsukamurella|s__Tsukamurella_unclassified	0	0	0	0	0	0	0	0	0	0	0	0	0	0	0	0	0	0	0	0	0	0	0	0	0	0	0	0	0	0	0.00622	0	0	0	0	0	0	0	0	0	0	0	0	0	0	0	0	0	0
d__Bacteria|p__Actinobacteriota|c__Actinobacteria|o__Frankiales	0.0818	0	0	0	0	0	0	0	0	0	0	0.02309	0	0	0	0	0.04096	0	0	0	0	0	0	0	0	0.16108	0	0	0	0	0.00622	0	0	0.00538	0	0	0	0	0	0	0	0	0.00504	0	0	0	0	0	0
d__Bacteria|p__Actinobacteriota|c__Actinobacteria|o__Frankiales|f__Acidothermaceae	0	0	0	0	0	0	0	0	0	0	0	0	0	0	0	0	0.00964	0	0	0	0	0	0	0	0	0	0	0	0	0	0	0	0	0.00538	0	0	0	0	0	0	0	0	0	0	0	0	0	0	0
d__Bacteria|p__Actinobacteriota|c__Actinobacteria|o__Frankiales|f__Acidothermaceae|g__Acidothermus	0	0	0	0	0	0	0	0	0	0	0	0	0	0	0	0	0.00964	0	0	0	0	0	0	0	0	0	0	0	0	0	0	0	0	0.00538	0	0	0	0	0	0	0	0	0	0	0	0	0	0	0
d__Bacteria|p__Actinobacteriota|c__Actinobacteria|o__Frankiales|f__Acidothermaceae|g__Acidothermus|s__Acidothermus_unclassified	0	0	0	0	0	0	0	0	0	0	0	0	0	0	0	0	0.00964	0	0	0	0	0	0	0	0	0	0	0	0	0	0	0	0	0.00538	0	0	0	0	0	0	0	0	0	0	0	0	0	0	0
d__Bacteria|p__Actinobacteriota|c__Actinobacteria|o__Frankiales|f__Geodermatophilaceae	0.0818	0	0	0	0	0	0	0	0	0	0	0.02309	0	0	0	0	0.03132	0	0	0	0	0	0	0	0	0.16108	0	0	0	0	0.00622	0	0	0	0	0	0	0	0	0	0	0	0.00504	0	0	0	0	0	0
d__Bacteria|p__Actinobacteriota|c__Actinobacteria|o__Frankiales|f__Geodermatophilaceae|g__Blastococcus	0.0818	0	0	0	0	0	0	0	0	0	0	0.02309	0	0	0	0	0.03132	0	0	0	0	0	0	0	0	0.16108	0	0	0	0	0.00622	0	0	0	0	0	0	0	0	0	0	0	0.00504	0	0	0	0	0	0
d__Bacteria|p__Actinobacteriota|c__Actinobacteria|o__Frankiales|f__Geodermatophilaceae|g__Blastococcus|s__Blastococcus_unclassified	0.0818	0	0	0	0	0	0	0	0	0	0	0.02309	0	0	0	0	0.03132	0	0	0	0	0	0	0	0	0.16108	0	0	0	0	0.00622	0	0	0	0	0	0	0	0	0	0	0	0.00504	0	0	0	0	0	0
d__Bacteria|p__Actinobacteriota|c__Actinobacteria|o__Frankiales|f__Geodermatophilaceae|g__Geodermatophilus	0	0	0	0	0	0	0	0	0	0	0	0	0	0	0	0	0	0	0	0	0	0	0	0	0	0	0	0	0	0	0	0	0	0	0	0	0	0	0	0	0	0	0	0	0	0	0	0	0
d__Bacteria|p__Actinobacteriota|c__Actinobacteria|o__Frankiales|f__Geodermatophilaceae|g__Geodermatophilus|s__Geodermatophilus_unclassified	0	0	0	0	0	0	0	0	0	0	0	0	0	0	0	0	0	0	0	0	0	0	0	0	0	0	0	0	0	0	0	0	0	0	0	0	0	0	0	0	0	0	0	0	0	0	0	0	0
d__Bacteria|p__Actinobacteriota|c__Actinobacteria|o__Frankiales|f__Geodermatophilaceae|g__Modestobacter	0	0	0	0	0	0	0	0	0	0	0	0	0	0	0	0	0	0	0	0	0	0	0	0	0	0	0	0	0	0	0	0	0	0	0	0	0	0	0	0	0	0	0	0	0	0	0	0	0
d__Bacteria|p__Actinobacteriota|c__Actinobacteria|o__Frankiales|f__Geodermatophilaceae|g__Modestobacter|s__Modestobacter_unclassified	0	0	0	0	0	0	0	0	0	0	0	0	0	0	0	0	0	0	0	0	0	0	0	0	0	0	0	0	0	0	0	0	0	0	0	0	0	0	0	0	0	0	0	0	0	0	0	0	0
d__Bacteria|p__Actinobacteriota|c__Actinobacteria|o__Kineosporiales	0	0	0.03406	0	0.00532	0	0	0	0	0	0	0	0	0	0	0	0	0	0	0	0	0	0	0	0	0	0	0	0	0	0	0	0	0.00403	0	0	0	0	0	0	0	0	0	0	0	0	0	0	0
d__Bacteria|p__Actinobacteriota|c__Actinobacteria|o__Kineosporiales|f__Kineosporiaceae	0	0	0.03406	0	0.00532	0	0	0	0	0	0	0	0	0	0	0	0	0	0	0	0	0	0	0	0	0	0	0	0	0	0	0	0	0.00403	0	0	0	0	0	0	0	0	0	0	0	0	0	0	0
d__Bacteria|p__Actinobacteriota|c__Actinobacteria|o__Kineosporiales|f__Kineosporiaceae|g__Kineococcus	0	0	0	0	0.00532	0	0	0	0	0	0	0	0	0	0	0	0	0	0	0	0	0	0	0	0	0	0	0	0	0	0	0	0	0	0	0	0	0	0	0	0	0	0	0	0	0	0	0	0
d__Bacteria|p__Actinobacteriota|c__Actinobacteria|o__Kineosporiales|f__Kineosporiaceae|g__Kineococcus|s__Kineococcus_unclassified	0	0	0	0	0.00532	0	0	0	0	0	0	0	0	0	0	0	0	0	0	0	0	0	0	0	0	0	0	0	0	0	0	0	0	0	0	0	0	0	0	0	0	0	0	0	0	0	0	0	0
d__Bacteria|p__Actinobacteriota|c__Actinobacteria|o__Kineosporiales|f__Kineosporiaceae|g__Pseudokineococcus	0	0	0.03406	0	0	0	0	0	0	0	0	0	0	0	0	0	0	0	0	0	0	0	0	0	0	0	0	0	0	0	0	0	0	0	0	0	0	0	0	0	0	0	0	0	0	0	0	0	0
d__Bacteria|p__Actinobacteriota|c__Actinobacteria|o__Kineosporiales|f__Kineosporiaceae|g__Pseudokineococcus|s__Pseudokineococcus_unclassified	0	0	0.03406	0	0	0	0	0	0	0	0	0	0	0	0	0	0	0	0	0	0	0	0	0	0	0	0	0	0	0	0	0	0	0	0	0	0	0	0	0	0	0	0	0	0	0	0	0	0
d__Bacteria|p__Actinobacteriota|c__Actinobacteria|o__Kineosporiales|f__Kineosporiaceae|g__Quadrisphaera	0	0	0	0	0	0	0	0	0	0	0	0	0	0	0	0	0	0	0	0	0	0	0	0	0	0	0	0	0	0	0	0	0	0.00403	0	0	0	0	0	0	0	0	0	0	0	0	0	0	0
d__Bacteria|p__Actinobacteriota|c__Actinobacteria|o__Kineosporiales|f__Kineosporiaceae|g__Quadrisphaera|s__Quadrisphaera_unclassified	0	0	0	0	0	0	0	0	0	0	0	0	0	0	0	0	0	0	0	0	0	0	0	0	0	0	0	0	0	0	0	0	0	0.00403	0	0	0	0	0	0	0	0	0	0	0	0	0	0	0
d__Bacteria|p__Actinobacteriota|c__Actinobacteria|o__Micrococcales	0.08998	0	0.32074	0	0	0	0.02448	0.03627	0	0.03304	0.00385	0	0	0	0.03349	0.0908	0.01204	0.05486	0	0	0.00675	0.01176	5.77615	1.92211	0.65766	7.76201	2.18409	0.35698	0.66409	1.23221	0.00777	0.43024	0.01437	0	0.031	0.01977	0.02767	0	0.26968	0.12645	0.27305	0	0.11433	0.26969	0.01089	0.28213	0.0798	0.40863	0.07509
d__Bacteria|p__Actinobacteriota|c__Actinobacteria|o__Micrococcales|f__Bogoriellaceae	0	0	0	0	0	0	0	0	0	0.02753	0	0	0	0	0	0	0	0	0	0	0	0	0	0	0.1102	0	0	0	0	0	0	0	0	0	0	0	0	0	0.01815	0	0	0	0	0	0	0	0	0.25677	0
d__Bacteria|p__Actinobacteriota|c__Actinobacteria|o__Micrococcales|f__Bogoriellaceae|g__Georgenia	0	0	0	0	0	0	0	0	0	0.02753	0	0	0	0	0	0	0	0	0	0	0	0	0	0	0.1102	0	0	0	0	0	0	0	0	0	0	0	0	0	0.01815	0	0	0	0	0	0	0	0	0.25677	0
d__Bacteria|p__Actinobacteriota|c__Actinobacteria|o__Micrococcales|f__Bogoriellaceae|g__Georgenia|s__Georgenia_unclassified	0	0	0	0	0	0	0	0	0	0.02753	0	0	0	0	0	0	0	0	0	0	0	0	0	0	0.1102	0	0	0	0	0	0	0	0	0	0	0	0	0	0.01815	0	0	0	0	0	0	0	0	0.25677	0
d__Bacteria|p__Actinobacteriota|c__Actinobacteria|o__Micrococcales|f__Brevibacteriaceae	0	0	0	0	0	0	0	0	0	0	0	0	0	0	0	0	0	0	0	0	0	0	0	0	0.016	0	0	0	0.03027	0	0	0	0	0	0	0	0	0	0	0	0	0	0	0	0	0.00468	0	0	0
d__Bacteria|p__Actinobacteriota|c__Actinobacteria|o__Micrococcales|f__Brevibacteriaceae|g__Brevibacterium	0	0	0	0	0	0	0	0	0	0	0	0	0	0	0	0	0	0	0	0	0	0	0	0	0.016	0	0	0	0.03027	0	0	0	0	0	0	0	0	0	0	0	0	0	0	0	0	0.00468	0	0	0
d__Bacteria|p__Actinobacteriota|c__Actinobacteria|o__Micrococcales|f__Brevibacteriaceae|g__Brevibacterium|s__Brevibacterium_unclassified	0	0	0	0	0	0	0	0	0	0	0	0	0	0	0	0	0	0	0	0	0	0	0	0	0.016	0	0	0	0.03027	0	0	0	0	0	0	0	0	0	0	0	0	0	0	0	0	0.00468	0	0	0
d__Bacteria|p__Actinobacteriota|c__Actinobacteria|o__Micrococcales|f__Cellulomonadaceae	0	0	0	0	0	0	0	0	0	0	0	0	0	0	0	0	0	0	0	0	0	0	0	0	0	0	0	0	0	0.09144	0	0	0	0	0	0	0	0	0	0	0	0	0	0	0	0	0	0	0
d__Bacteria|p__Actinobacteriota|c__Actinobacteria|o__Micrococcales|f__Cellulomonadaceae|g__Actinotalea	0	0	0	0	0	0	0	0	0	0	0	0	0	0	0	0	0	0	0	0	0	0	0	0	0	0	0	0	0	0.09144	0	0	0	0	0	0	0	0	0	0	0	0	0	0	0	0	0	0	0
d__Bacteria|p__Actinobacteriota|c__Actinobacteria|o__Micrococcales|f__Cellulomonadaceae|g__Actinotalea|s__Actinotalea_unclassified	0	0	0	0	0	0	0	0	0	0	0	0	0	0	0	0	0	0	0	0	0	0	0	0	0	0	0	0	0	0.09144	0	0	0	0	0	0	0	0	0	0	0	0	0	0	0	0	0	0	0
d__Bacteria|p__Actinobacteriota|c__Actinobacteria|o__Micrococcales|f__Cellulomonadaceae|g__Cellulomonas	0	0	0	0	0	0	0	0	0	0	0	0	0	0	0	0	0	0	0	0	0	0	0	0	0	0	0	0	0	0	0	0	0	0	0	0	0	0	0	0	0	0	0	0	0	0	0	0	0
d__Bacteria|p__Actinobacteriota|c__Actinobacteria|o__Micrococcales|f__Cellulomonadaceae|g__Cellulomonas|s__Cellulomonas_unclassified	0	0	0	0	0	0	0	0	0	0	0	0	0	0	0	0	0	0	0	0	0	0	0	0	0	0	0	0	0	0	0	0	0	0	0	0	0	0	0	0	0	0	0	0	0	0	0	0	0
d__Bacteria|p__Actinobacteriota|c__Actinobacteria|o__Micrococcales|f__Dermabacteraceae	0.07362	0	0	0	0	0	0	0	0	0	0	0	0	0	0	0	0.01204	0	0	0	0	0	0	0	0	0	0	0	0	0	0	0	0	0	0.01691	0	0	0	0	0	0	0	0	0	0	0	0	0	0
d__Bacteria|p__Actinobacteriota|c__Actinobacteria|o__Micrococcales|f__Dermabacteraceae|g__Brachybacterium	0	0	0	0	0	0	0	0	0	0	0	0	0	0	0	0	0.01204	0	0	0	0	0	0	0	0	0	0	0	0	0	0	0	0	0	0	0	0	0	0	0	0	0	0	0	0	0	0	0	0
d__Bacteria|p__Actinobacteriota|c__Actinobacteria|o__Micrococcales|f__Dermabacteraceae|g__Brachybacterium|s__Brachybacterium_unclassified	0	0	0	0	0	0	0	0	0	0	0	0	0	0	0	0	0.01204	0	0	0	0	0	0	0	0	0	0	0	0	0	0	0	0	0	0	0	0	0	0	0	0	0	0	0	0	0	0	0	0
d__Bacteria|p__Actinobacteriota|c__Actinobacteria|o__Micrococcales|f__Dermabacteraceae|g__Dermabacter	0.07362	0	0	0	0	0	0	0	0	0	0	0	0	0	0	0	0	0	0	0	0	0	0	0	0	0	0	0	0	0	0	0	0	0	0.01691	0	0	0	0	0	0	0	0	0	0	0	0	0	0
d__Bacteria|p__Actinobacteriota|c__Actinobacteria|o__Micrococcales|f__Dermabacteraceae|g__Dermabacter|s__Dermabacter_unclassified	0.07362	0	0	0	0	0	0	0	0	0	0	0	0	0	0	0	0	0	0	0	0	0	0	0	0	0	0	0	0	0	0	0	0	0	0.01691	0	0	0	0	0	0	0	0	0	0	0	0	0	0
d__Bacteria|p__Actinobacteriota|c__Actinobacteria|o__Micrococcales|f__Dermacoccaceae	0	0	0	0	0	0	0	0	0	0	0	0	0	0	0	0	0	0	0	0	0	0	0	0	0.02844	0	0	0	0	0	0	0	0	0	0	0	0	0	0	0	0.27305	0	0	0	0	0	0	0	0
d__Bacteria|p__Actinobacteriota|c__Actinobacteria|o__Micrococcales|f__Dermacoccaceae|g__Barrientosiimonas	0	0	0	0	0	0	0	0	0	0	0	0	0	0	0	0	0	0	0	0	0	0	0	0	0	0	0	0	0	0	0	0	0	0	0	0	0	0	0	0	0.27305	0	0	0	0	0	0	0	0
d__Bacteria|p__Actinobacteriota|c__Actinobacteria|o__Micrococcales|f__Dermacoccaceae|g__Barrientosiimonas|s__Barrientosiimonas_unclassified	0	0	0	0	0	0	0	0	0	0	0	0	0	0	0	0	0	0	0	0	0	0	0	0	0	0	0	0	0	0	0	0	0	0	0	0	0	0	0	0	0.27305	0	0	0	0	0	0	0	0
d__Bacteria|p__Actinobacteriota|c__Actinobacteria|o__Micrococcales|f__Dermacoccaceae|g__Dermacoccus	0	0	0	0	0	0	0	0	0	0	0	0	0	0	0	0	0	0	0	0	0	0	0	0	0	0	0	0	0	0	0	0	0	0	0	0	0	0	0	0	0	0	0	0	0	0	0	0	0
d__Bacteria|p__Actinobacteriota|c__Actinobacteria|o__Micrococcales|f__Dermacoccaceae|g__Dermacoccus|s__Dermacoccus_unclassified	0	0	0	0	0	0	0	0	0	0	0	0	0	0	0	0	0	0	0	0	0	0	0	0	0	0	0	0	0	0	0	0	0	0	0	0	0	0	0	0	0	0	0	0	0	0	0	0	0
d__Bacteria|p__Actinobacteriota|c__Actinobacteria|o__Micrococcales|f__Dermacoccaceae|g__Kytococcus	0	0	0	0	0	0	0	0	0	0	0	0	0	0	0	0	0	0	0	0	0	0	0	0	0.02844	0	0	0	0	0	0	0	0	0	0	0	0	0	0	0	0	0	0	0	0	0	0	0	0
d__Bacteria|p__Actinobacteriota|c__Actinobacteria|o__Micrococcales|f__Dermacoccaceae|g__Kytococcus|s__Kytococcus_unclassified	0	0	0	0	0	0	0	0	0	0	0	0	0	0	0	0	0	0	0	0	0	0	0	0	0.02844	0	0	0	0	0	0	0	0	0	0	0	0	0	0	0	0	0	0	0	0	0	0	0	0
d__Bacteria|p__Actinobacteriota|c__Actinobacteria|o__Micrococcales|f__Intrasporangiaceae	0	0	0	0	0	0	0	0	0	0	0	0	0	0	0	0	0	0	0	0	0	0	0	0	0	0	0	0	0	0	0	0	0	0	0	0	0	0	0	0	0	0	0	0	0	0	0	0	0
d__Bacteria|p__Actinobacteriota|c__Actinobacteria|o__Micrococcales|f__Intrasporangiaceae|g__Ornithinimicrobium	0	0	0	0	0	0	0	0	0	0	0	0	0	0	0	0	0	0	0	0	0	0	0	0	0	0	0	0	0	0	0	0	0	0	0	0	0	0	0	0	0	0	0	0	0	0	0	0	0
d__Bacteria|p__Actinobacteriota|c__Actinobacteria|o__Micrococcales|f__Intrasporangiaceae|g__Ornithinimicrobium|s__Ornithinimicrobium_unclassified	0	0	0	0	0	0	0	0	0	0	0	0	0	0	0	0	0	0	0	0	0	0	0	0	0	0	0	0	0	0	0	0	0	0	0	0	0	0	0	0	0	0	0	0	0	0	0	0	0
d__Bacteria|p__Actinobacteriota|c__Actinobacteria|o__Micrococcales|f__Microbacteriaceae	0	0	0	0	0	0	0	0	0	0.00551	0	0	0	0	0.03349	0	0	0.01097	0	0	0	0	0	0	0	0	0	0	0	0	0	0.04064	0	0	0	0	0	0	0	0	0	0	0	0	0	0	0	0	0
d__Bacteria|p__Actinobacteriota|c__Actinobacteria|o__Micrococcales|f__Microbacteriaceae|g__Amnibacterium	0	0	0	0	0	0	0	0	0	0.00551	0	0	0	0	0	0	0	0	0	0	0	0	0	0	0	0	0	0	0	0	0	0	0	0	0	0	0	0	0	0	0	0	0	0	0	0	0	0	0
d__Bacteria|p__Actinobacteriota|c__Actinobacteria|o__Micrococcales|f__Microbacteriaceae|g__Amnibacterium|s__Amnibacterium_unclassified	0	0	0	0	0	0	0	0	0	0.00551	0	0	0	0	0	0	0	0	0	0	0	0	0	0	0	0	0	0	0	0	0	0	0	0	0	0	0	0	0	0	0	0	0	0	0	0	0	0	0
d__Bacteria|p__Actinobacteriota|c__Actinobacteria|o__Micrococcales|f__Microbacteriaceae|g__Curtobacterium	0	0	0	0	0	0	0	0	0	0	0	0	0	0	0	0	0	0.01097	0	0	0	0	0	0	0	0	0	0	0	0	0	0	0	0	0	0	0	0	0	0	0	0	0	0	0	0	0	0	0
d__Bacteria|p__Actinobacteriota|c__Actinobacteria|o__Micrococcales|f__Microbacteriaceae|g__Curtobacterium|s__Curtobacterium_unclassified	0	0	0	0	0	0	0	0	0	0	0	0	0	0	0	0	0	0.01097	0	0	0	0	0	0	0	0	0	0	0	0	0	0	0	0	0	0	0	0	0	0	0	0	0	0	0	0	0	0	0
d__Bacteria|p__Actinobacteriota|c__Actinobacteria|o__Micrococcales|f__Microbacteriaceae|g__Leucobacter	0	0	0	0	0	0	0	0	0	0	0	0	0	0	0	0	0	0	0	0	0	0	0	0	0	0	0	0	0	0	0	0	0	0	0	0	0	0	0	0	0	0	0	0	0	0	0	0	0
d__Bacteria|p__Actinobacteriota|c__Actinobacteria|o__Micrococcales|f__Microbacteriaceae|g__Leucobacter|s__Leucobacter_unclassified	0	0	0	0	0	0	0	0	0	0	0	0	0	0	0	0	0	0	0	0	0	0	0	0	0	0	0	0	0	0	0	0	0	0	0	0	0	0	0	0	0	0	0	0	0	0	0	0	0
d__Bacteria|p__Actinobacteriota|c__Actinobacteria|o__Micrococcales|f__Microbacteriaceae|g__Microbacterium	0	0	0	0	0	0	0	0	0	0	0	0	0	0	0.03349	0	0	0	0	0	0	0	0	0	0	0	0	0	0	0	0	0.04064	0	0	0	0	0	0	0	0	0	0	0	0	0	0	0	0	0
d__Bacteria|p__Actinobacteriota|c__Actinobacteria|o__Micrococcales|f__Microbacteriaceae|g__Microbacterium|s__Microbacterium_unclassified	0	0	0	0	0	0	0	0	0	0	0	0	0	0	0.03349	0	0	0	0	0	0	0	0	0	0	0	0	0	0	0	0	0.04064	0	0	0	0	0	0	0	0	0	0	0	0	0	0	0	0	0
d__Bacteria|p__Actinobacteriota|c__Actinobacteria|o__Micrococcales|f__Micrococcaceae	0.01636	0	0.32074	0	0	0	0.02448	0.03627	0	0	0.00385	0	0	0	0	0.0908	0	0.04389	0	0	0.00675	0.01176	5.77615	1.92211	0.50302	7.76201	2.18409	0.35698	0.63382	1.14077	0.00777	0.3896	0.01437	0	0.01409	0.01977	0.02767	0	0.25153	0.12645	0	0	0.11433	0.26969	0.01089	0.27745	0.0798	0.15186	0.07509
d__Bacteria|p__Actinobacteriota|c__Actinobacteria|o__Micrococcales|f__Micrococcaceae|g__Glutamicibacter	0	0	0	0	0	0	0	0	0	0	0	0	0	0	0	0	0	0	0	0	0	0	0	0	0	0	0	0	0	0	0	0.00841	0	0	0	0	0	0	0	0	0	0	0	0	0	0	0	0	0
d__Bacteria|p__Actinobacteriota|c__Actinobacteria|o__Micrococcales|f__Micrococcaceae|g__Glutamicibacter|s__Glutamicibacter_unclassified	0	0	0	0	0	0	0	0	0	0	0	0	0	0	0	0	0	0	0	0	0	0	0	0	0	0	0	0	0	0	0	0.00841	0	0	0	0	0	0	0	0	0	0	0	0	0	0	0	0	0
d__Bacteria|p__Actinobacteriota|c__Actinobacteria|o__Micrococcales|f__Micrococcaceae|g__Kocuria	0	0	0.01419	0	0	0	0	0	0	0	0	0	0	0	0	0	0	0	0	0	0	0	0	0	0	0	0	0	0	0	0.00311	0	0.01437	0	0	0	0.01302	0	0	0	0	0	0	0	0	0.01403	0	0	0
d__Bacteria|p__Actinobacteriota|c__Actinobacteria|o__Micrococcales|f__Micrococcaceae|g__Kocuria|s__Kocuria_unclassified	0	0	0.01419	0	0	0	0	0	0	0	0	0	0	0	0	0	0	0	0	0	0	0	0	0	0	0	0	0	0	0	0.00311	0	0.01437	0	0	0	0.01302	0	0	0	0	0	0	0	0	0.01403	0	0	0
d__Bacteria|p__Actinobacteriota|c__Actinobacteria|o__Micrococcales|f__Micrococcaceae|g__Micrococcus	0	0	0	0	0	0	0	0	0	0	0	0	0	0	0	0	0	0	0	0	0	0	0	0	0	0	0	0	0	0	0	0.38119	0	0	0	0	0	0	0.04927	0	0	0	0	0	0	0	0	0	0
d__Bacteria|p__Actinobacteriota|c__Actinobacteria|o__Micrococcales|f__Micrococcaceae|g__Micrococcus|s__Micrococcus_unclassified	0	0	0	0	0	0	0	0	0	0	0	0	0	0	0	0	0	0	0	0	0	0	0	0	0	0	0	0	0	0	0	0.38119	0	0	0	0	0	0	0.04927	0	0	0	0	0	0	0	0	0	0
d__Bacteria|p__Actinobacteriota|c__Actinobacteria|o__Micrococcales|f__Micrococcaceae|g__Neomicrococcus	0	0	0	0	0	0	0	0	0	0	0	0	0	0	0	0	0	0	0	0	0	0	0	0	0	0	0	0	0	0	0	0	0	0	0	0.01977	0	0	0	0	0	0	0	0	0	0	0	0	0
d__Bacteria|p__Actinobacteriota|c__Actinobacteria|o__Micrococcales|f__Micrococcaceae|g__Neomicrococcus|s__Neomicrococcus_unclassified	0	0	0	0	0	0	0	0	0	0	0	0	0	0	0	0	0	0	0	0	0	0	0	0	0	0	0	0	0	0	0	0	0	0	0	0.01977	0	0	0	0	0	0	0	0	0	0	0	0	0
d__Bacteria|p__Actinobacteriota|c__Actinobacteria|o__Micrococcales|f__Micrococcaceae|g__Paenarthrobacter	0	0	0	0	0	0	0	0	0	0	0	0	0	0	0	0	0	0	0	0	0	0	0	0	0	0	0	0	0	0	0	0	0	0	0	0	0	0	0	0	0	0	0	0	0	0	0	0.01657	0
d__Bacteria|p__Actinobacteriota|c__Actinobacteria|o__Micrococcales|f__Micrococcaceae|g__Paenarthrobacter|s__Paenarthrobacter_unclassified	0	0	0	0	0	0	0	0	0	0	0	0	0	0	0	0	0	0	0	0	0	0	0	0	0	0	0	0	0	0	0	0	0	0	0	0	0	0	0	0	0	0	0	0	0	0	0	0.01657	0
d__Bacteria|p__Actinobacteriota|c__Actinobacteria|o__Micrococcales|f__Micrococcaceae|g__Rothia	0.01636	0	0.30655	0	0	0	0.02448	0.03627	0	0	0.00385	0	0	0	0	0.0908	0	0.04389	0	0	0.00675	0.01176	5.77615	1.92211	0.50302	7.76201	2.18409	0.35698	0.63382	1.14077	0.00466	0	0	0	0.01409	0	0.01465	0	0.20226	0.12645	0	0	0.11433	0.26969	0.01089	0.26342	0.0798	0.13529	0.07509
d__Bacteria|p__Actinobacteriota|c__Actinobacteria|o__Micrococcales|f__Micrococcaceae|g__Rothia|s__Rothia_unclassified	0.01636	0	0.30655	0	0	0	0.02448	0.03627	0	0	0.00385	0	0	0	0	0.0908	0	0.04389	0	0	0.00675	0.01176	5.77615	1.92211	0.50302	7.76201	2.18409	0.35698	0.63382	1.14077	0.00466	0	0	0	0.01409	0	0.01465	0	0.20226	0.12645	0	0	0.11433	0.26969	0.01089	0.26342	0.0798	0.13529	0.07509
d__Bacteria|p__Actinobacteriota|c__Actinobacteria|o__Micromonosporales	0	0	0	0	0	0	0	0	0	0	0	0	0	0	0	0	0	0	0	0	0	0	0	0	0	0	0	0	0	0	0	0	0	0.00941	0	0	0	0	0	0	0.3427	0	0.01345	0	0	0	0	0	0
d__Bacteria|p__Actinobacteriota|c__Actinobacteria|o__Micromonosporales|f__Micromonosporaceae	0	0	0	0	0	0	0	0	0	0	0	0	0	0	0	0	0	0	0	0	0	0	0	0	0	0	0	0	0	0	0	0	0	0.00941	0	0	0	0	0	0	0.3427	0	0.01345	0	0	0	0	0	0
d__Bacteria|p__Actinobacteriota|c__Actinobacteria|o__Micromonosporales|f__Micromonosporaceae|g__Longispora	0	0	0	0	0	0	0	0	0	0	0	0	0	0	0	0	0	0	0	0	0	0	0	0	0	0	0	0	0	0	0	0	0	0.00941	0	0	0	0	0	0	0.3427	0	0	0	0	0	0	0	0
d__Bacteria|p__Actinobacteriota|c__Actinobacteria|o__Micromonosporales|f__Micromonosporaceae|g__Longispora|s__Longispora_unclassified	0	0	0	0	0	0	0	0	0	0	0	0	0	0	0	0	0	0	0	0	0	0	0	0	0	0	0	0	0	0	0	0	0	0.00941	0	0	0	0	0	0	0.3427	0	0	0	0	0	0	0	0
d__Bacteria|p__Actinobacteriota|c__Actinobacteria|o__Micromonosporales|f__Micromonosporaceae|g__Luedemannella	0	0	0	0	0	0	0	0	0	0	0	0	0	0	0	0	0	0	0	0	0	0	0	0	0	0	0	0	0	0	0	0	0	0	0	0	0	0	0	0	0	0	0.01345	0	0	0	0	0	0
d__Bacteria|p__Actinobacteriota|c__Actinobacteria|o__Micromonosporales|f__Micromonosporaceae|g__Luedemannella|s__Luedemannella_unclassified	0	0	0	0	0	0	0	0	0	0	0	0	0	0	0	0	0	0	0	0	0	0	0	0	0	0	0	0	0	0	0	0	0	0	0	0	0	0	0	0	0	0	0.01345	0	0	0	0	0	0
d__Bacteria|p__Actinobacteriota|c__Actinobacteria|o__Micromonosporales|f__Micromonosporaceae|g__Virgisporangium	0	0	0	0	0	0	0	0	0	0	0	0	0	0	0	0	0	0	0	0	0	0	0	0	0	0	0	0	0	0	0	0	0	0	0	0	0	0	0	0	0	0	0	0	0	0	0	0	0
d__Bacteria|p__Actinobacteriota|c__Actinobacteria|o__Micromonosporales|f__Micromonosporaceae|g__Virgisporangium|s__Virgisporangium_unclassified	0	0	0	0	0	0	0	0	0	0	0	0	0	0	0	0	0	0	0	0	0	0	0	0	0	0	0	0	0	0	0	0	0	0	0	0	0	0	0	0	0	0	0	0	0	0	0	0	0
d__Bacteria|p__Actinobacteriota|c__Actinobacteria|o__Propionibacteriales	0.45808	0.25546	0.02555	0.27899	0	0.00612	0.01142	0	0.02544	0	0	0.01539	0	0	0.02711	0.12675	0	0.00658	0	0	0	0	0.36614	0.10605	0.0551	4.17799	0.01152	0	0	0.03774	0.02487	0.2943	0	0.02017	0	0	0.03419	0	0.04149	0.02762	0.09194	0.32205	0.12779	0	0	0.07949	0.01164	0.02209	0.01168
d__Bacteria|p__Actinobacteriota|c__Actinobacteria|o__Propionibacteriales|f__Nocardioidaceae	0.31084	0	0	0.05008	0	0	0	0	0	0	0	0	0	0	0	0.10972	0	0	0	0	0	0	0	0	0	0.4027	0.01152	0	0	0	0	0	0	0.00807	0	0	0	0	0	0	0.01114	0.014	0.01177	0	0	0	0	0	0
d__Bacteria|p__Actinobacteriota|c__Actinobacteria|o__Propionibacteriales|f__Nocardioidaceae|g__Aeromicrobium	0	0	0	0	0	0	0	0	0	0	0	0	0	0	0	0	0	0	0	0	0	0	0	0	0	0	0.01152	0	0	0	0	0	0	0	0	0	0	0	0	0	0.01114	0	0.01177	0	0	0	0	0	0
d__Bacteria|p__Actinobacteriota|c__Actinobacteria|o__Propionibacteriales|f__Nocardioidaceae|g__Aeromicrobium|s__Aeromicrobium_unclassified	0	0	0	0	0	0	0	0	0	0	0	0	0	0	0	0	0	0	0	0	0	0	0	0	0	0	0.01152	0	0	0	0	0	0	0	0	0	0	0	0	0	0.01114	0	0.01177	0	0	0	0	0	0
d__Bacteria|p__Actinobacteriota|c__Actinobacteria|o__Propionibacteriales|f__Nocardioidaceae|g__Marmoricola	0	0	0	0	0	0	0	0	0	0	0	0	0	0	0	0.10215	0	0	0	0	0	0	0	0	0	0.4027	0	0	0	0	0	0	0	0	0	0	0	0	0	0	0	0	0	0	0	0	0	0	0
d__Bacteria|p__Actinobacteriota|c__Actinobacteria|o__Propionibacteriales|f__Nocardioidaceae|g__Marmoricola|s__Marmoricola_unclassified	0	0	0	0	0	0	0	0	0	0	0	0	0	0	0	0.10215	0	0	0	0	0	0	0	0	0	0.4027	0	0	0	0	0	0	0	0	0	0	0	0	0	0	0	0	0	0	0	0	0	0	0
d__Bacteria|p__Actinobacteriota|c__Actinobacteria|o__Propionibacteriales|f__Nocardioidaceae|g__Nocardioides	0.31084	0	0	0.05008	0	0	0	0	0	0	0	0	0	0	0	0.00757	0	0	0	0	0	0	0	0	0	0	0	0	0	0	0	0	0	0.00807	0	0	0	0	0	0	0	0.014	0	0	0	0	0	0	0
d__Bacteria|p__Actinobacteriota|c__Actinobacteria|o__Propionibacteriales|f__Nocardioidaceae|g__Nocardioides|s__Nocardioides_unclassified	0.31084	0	0	0.05008	0	0	0	0	0	0	0	0	0	0	0	0.00757	0	0	0	0	0	0	0	0	0	0	0	0	0	0	0	0	0	0.00807	0	0	0	0	0	0	0	0.014	0	0	0	0	0	0	0
d__Bacteria|p__Actinobacteriota|c__Actinobacteria|o__Propionibacteriales|f__Propionibacteriaceae	0.14724	0.25546	0.02555	0.22891	0	0.00612	0.01142	0	0.02544	0	0	0.01539	0	0	0.02711	0.01703	0	0.00658	0	0	0	0	0.36614	0.10605	0.0551	3.77529	0	0	0	0.03774	0.02487	0.2943	0	0.0121	0	0	0.03419	0	0.04149	0.02762	0.0808	0.30805	0.11602	0	0	0.07949	0.01164	0.02209	0.01168
d__Bacteria|p__Actinobacteriota|c__Actinobacteria|o__Propionibacteriales|f__Propionibacteriaceae|g__Cutibacterium	0.14724	0.25546	0.02555	0.22891	0	0.00612	0.01142	0	0.02544	0	0	0.01539	0	0	0.02711	0.00757	0	0	0	0	0	0	0.36614	0.10605	0.0551	3.77529	0	0	0	0.03774	0.02176	0.2943	0	0.0121	0	0	0.03093	0	0.04149	0.00727	0.0808	0.28938	0.10929	0	0	0.07949	0	0.00552	0
d__Bacteria|p__Actinobacteriota|c__Actinobacteria|o__Propionibacteriales|f__Propionibacteriaceae|g__Cutibacterium|s__Cutibacterium_unclassified	0.14724	0.25546	0.02555	0.22891	0	0.00612	0.01142	0	0.02544	0	0	0.01539	0	0	0.02711	0.00757	0	0	0	0	0	0	0.36614	0.10605	0.0551	3.77529	0	0	0	0.03774	0.02176	0.2943	0	0.0121	0	0	0.03093	0	0.04149	0.00727	0.0808	0.28938	0.10929	0	0	0.07949	0	0.00552	0
d__Bacteria|p__Actinobacteriota|c__Actinobacteria|o__Propionibacteriales|f__Propionibacteriaceae|g__Friedmanniella	0	0	0	0	0	0	0	0	0	0	0	0	0	0	0	0	0	0	0	0	0	0	0	0	0	0	0	0	0	0	0	0	0	0	0	0	0	0	0	0	0	0	0.00673	0	0	0	0	0	0
d__Bacteria|p__Actinobacteriota|c__Actinobacteria|o__Propionibacteriales|f__Propionibacteriaceae|g__Friedmanniella|s__Friedmanniella_unclassified	0	0	0	0	0	0	0	0	0	0	0	0	0	0	0	0	0	0	0	0	0	0	0	0	0	0	0	0	0	0	0	0	0	0	0	0	0	0	0	0	0	0	0.00673	0	0	0	0	0	0
d__Bacteria|p__Actinobacteriota|c__Actinobacteria|o__Propionibacteriales|f__Propionibacteriaceae|g__Microlunatus	0	0	0	0	0	0	0	0	0	0	0	0	0	0	0	0	0	0	0	0	0	0	0	0	0	0	0	0	0	0	0.00311	0	0	0	0	0	0	0	0	0	0	0	0	0	0	0	0	0	0
d__Bacteria|p__Actinobacteriota|c__Actinobacteria|o__Propionibacteriales|f__Propionibacteriaceae|g__Microlunatus|s__Microlunatus_unclassified	0	0	0	0	0	0	0	0	0	0	0	0	0	0	0	0	0	0	0	0	0	0	0	0	0	0	0	0	0	0	0.00311	0	0	0	0	0	0	0	0	0	0	0	0	0	0	0	0	0	0
d__Bacteria|p__Actinobacteriota|c__Actinobacteria|o__Propionibacteriales|f__Propionibacteriaceae|g__Micropruina	0	0	0	0	0	0	0	0	0	0	0	0	0	0	0	0	0	0	0	0	0	0	0	0	0	0	0	0	0	0	0	0	0	0	0	0	0	0	0	0	0	0	0	0	0	0	0.01164	0	0.01168
d__Bacteria|p__Actinobacteriota|c__Actinobacteria|o__Propionibacteriales|f__Propionibacteriaceae|g__Micropruina|s__Micropruina_unclassified	0	0	0	0	0	0	0	0	0	0	0	0	0	0	0	0	0	0	0	0	0	0	0	0	0	0	0	0	0	0	0	0	0	0	0	0	0	0	0	0	0	0	0	0	0	0	0.01164	0	0.01168
d__Bacteria|p__Actinobacteriota|c__Actinobacteria|o__Propionibacteriales|f__Propionibacteriaceae|g__Propionicimonas	0	0	0	0	0	0	0	0	0	0	0	0	0	0	0	0.00946	0	0.00658	0	0	0	0	0	0	0	0	0	0	0	0	0	0	0	0	0	0	0.00326	0	0	0.02035	0	0.01867	0	0	0	0	0	0.01657	0
d__Bacteria|p__Actinobacteriota|c__Actinobacteria|o__Propionibacteriales|f__Propionibacteriaceae|g__Propionicimonas|s__Propionicimonas_unclassified	0	0	0	0	0	0	0	0	0	0	0	0	0	0	0	0.00946	0	0.00658	0	0	0	0	0	0	0	0	0	0	0	0	0	0	0	0	0	0	0.00326	0	0	0.02035	0	0.01867	0	0	0	0	0	0.01657	0
d__Bacteria|p__Actinobacteriota|c__Actinobacteria|o__Propionibacteriales|f__Propionibacteriaceae|g__Propioniferax	0	0	0	0	0	0	0	0	0	0	0	0	0	0	0	0	0	0	0	0	0	0	0	0	0	0	0	0	0	0	0	0	0	0	0	0	0	0	0	0	0	0	0	0	0	0	0	0	0
d__Bacteria|p__Actinobacteriota|c__Actinobacteria|o__Propionibacteriales|f__Propionibacteriaceae|g__Propioniferax|s__Propioniferax_unclassified	0	0	0	0	0	0	0	0	0	0	0	0	0	0	0	0	0	0	0	0	0	0	0	0	0	0	0	0	0	0	0	0	0	0	0	0	0	0	0	0	0	0	0	0	0	0	0	0	0
d__Bacteria|p__Actinobacteriota|c__Actinobacteria|o__Propionibacteriales|f__Propionibacteriaceae|g__Tessaracoccus	0	0	0	0	0	0	0	0	0	0	0	0	0	0	0	0	0	0	0	0	0	0	0	0	0	0	0	0	0	0	0	0	0	0	0	0	0	0	0	0	0	0	0	0	0	0	0	0	0
d__Bacteria|p__Actinobacteriota|c__Actinobacteria|o__Propionibacteriales|f__Propionibacteriaceae|g__Tessaracoccus|s__Tessaracoccus_unclassified	0	0	0	0	0	0	0	0	0	0	0	0	0	0	0	0	0	0	0	0	0	0	0	0	0	0	0	0	0	0	0	0	0	0	0	0	0	0	0	0	0	0	0	0	0	0	0	0	0
d__Bacteria|p__Actinobacteriota|c__Actinobacteria|o__Pseudonocardiales	0	0	0	0	0	0	0	0	0	0	0	0	0	0	0	0	0	0	0	0	0	0	0.08207	0	0	0	0	0	0	0	0	0	0	0.00672	0	0	0	0	0	0	0	0	0	0	0	0	0	0.01933	0
d__Bacteria|p__Actinobacteriota|c__Actinobacteria|o__Pseudonocardiales|f__Pseudonocardiaceae	0	0	0	0	0	0	0	0	0	0	0	0	0	0	0	0	0	0	0	0	0	0	0.08207	0	0	0	0	0	0	0	0	0	0	0.00672	0	0	0	0	0	0	0	0	0	0	0	0	0	0.01933	0
d__Bacteria|p__Actinobacteriota|c__Actinobacteria|o__Pseudonocardiales|f__Pseudonocardiaceae|g__Prauserella	0	0	0	0	0	0	0	0	0	0	0	0	0	0	0	0	0	0	0	0	0	0	0	0	0	0	0	0	0	0	0	0	0	0	0	0	0	0	0	0	0	0	0	0	0	0	0	0.01933	0
d__Bacteria|p__Actinobacteriota|c__Actinobacteria|o__Pseudonocardiales|f__Pseudonocardiaceae|g__Prauserella|s__Prauserella_unclassified	0	0	0	0	0	0	0	0	0	0	0	0	0	0	0	0	0	0	0	0	0	0	0	0	0	0	0	0	0	0	0	0	0	0	0	0	0	0	0	0	0	0	0	0	0	0	0	0.01933	0
d__Bacteria|p__Actinobacteriota|c__Actinobacteria|o__Pseudonocardiales|f__Pseudonocardiaceae|g__Pseudonocardia	0	0	0	0	0	0	0	0	0	0	0	0	0	0	0	0	0	0	0	0	0	0	0.08207	0	0	0	0	0	0	0	0	0	0	0	0	0	0	0	0	0	0	0	0	0	0	0	0	0	0
d__Bacteria|p__Actinobacteriota|c__Actinobacteria|o__Pseudonocardiales|f__Pseudonocardiaceae|g__Pseudonocardia|s__Pseudonocardia_unclassified	0	0	0	0	0	0	0	0	0	0	0	0	0	0	0	0	0	0	0	0	0	0	0.08207	0	0	0	0	0	0	0	0	0	0	0	0	0	0	0	0	0	0	0	0	0	0	0	0	0	0
d__Bacteria|p__Actinobacteriota|c__Actinobacteria|o__Pseudonocardiales|f__Pseudonocardiaceae|g__Saccharomonospora	0	0	0	0	0	0	0	0	0	0	0	0	0	0	0	0	0	0	0	0	0	0	0	0	0	0	0	0	0	0	0	0	0	0.00672	0	0	0	0	0	0	0	0	0	0	0	0	0	0	0
d__Bacteria|p__Actinobacteriota|c__Actinobacteria|o__Pseudonocardiales|f__Pseudonocardiaceae|g__Saccharomonospora|s__Saccharomonospora_unclassified	0	0	0	0	0	0	0	0	0	0	0	0	0	0	0	0	0	0	0	0	0	0	0	0	0	0	0	0	0	0	0	0	0	0.00672	0	0	0	0	0	0	0	0	0	0	0	0	0	0	0
d__Bacteria|p__Actinobacteriota|c__Actinobacteria|o__Pseudonocardiales|f__Pseudonocardiaceae|g__Saccharopolyspora	0	0	0	0	0	0	0	0	0	0	0	0	0	0	0	0	0	0	0	0	0	0	0	0	0	0	0	0	0	0	0	0	0	0	0	0	0	0	0	0	0	0	0	0	0	0	0	0	0
d__Bacteria|p__Actinobacteriota|c__Actinobacteria|o__Pseudonocardiales|f__Pseudonocardiaceae|g__Saccharopolyspora|s__Saccharopolyspora_unclassified	0	0	0	0	0	0	0	0	0	0	0	0	0	0	0	0	0	0	0	0	0	0	0	0	0	0	0	0	0	0	0	0	0	0	0	0	0	0	0	0	0	0	0	0	0	0	0	0	0
d__Bacteria|p__Actinobacteriota|c__Actinobacteria|o__Streptomycetales	0	0	0	0	0	0	0	0	0	0	0	0	0	0	0	0	0.01927	0	0	0	0	0	0	0	0	0	0	0	0	0	0	0	0	0	0	0	0	0	0	0	0	0	0	0	0	0	0	0	0
d__Bacteria|p__Actinobacteriota|c__Actinobacteria|o__Streptomycetales|f__Streptomycetaceae	0	0	0	0	0	0	0	0	0	0	0	0	0	0	0	0	0.01927	0	0	0	0	0	0	0	0	0	0	0	0	0	0	0	0	0	0	0	0	0	0	0	0	0	0	0	0	0	0	0	0
d__Bacteria|p__Actinobacteriota|c__Actinobacteria|o__Streptomycetales|f__Streptomycetaceae|g__Streptomyces	0	0	0	0	0	0	0	0	0	0	0	0	0	0	0	0	0.01927	0	0	0	0	0	0	0	0	0	0	0	0	0	0	0	0	0	0	0	0	0	0	0	0	0	0	0	0	0	0	0	0
d__Bacteria|p__Actinobacteriota|c__Actinobacteria|o__Streptomycetales|f__Streptomycetaceae|g__Streptomyces|s__Streptomyces_unclassified	0	0	0	0	0	0	0	0	0	0	0	0	0	0	0	0	0.01927	0	0	0	0	0	0	0	0	0	0	0	0	0	0	0	0	0	0	0	0	0	0	0	0	0	0	0	0	0	0	0	0
d__Bacteria|p__Actinobacteriota|c__Actinobacteria|o__Streptosporangiales	0	0	0	0	0	0	0	0	0	0	0	0	0	0	0	0.0227	0	0	0	0	0	0	0	0.10605	0	0	0	0	0.03217	0	0	0	0	0.0121	0.00846	0	0	0	0	0	0	0	0	0	0	0	0	0	0
d__Bacteria|p__Actinobacteriota|c__Actinobacteria|o__Streptosporangiales|f__Nocardiopsaceae	0	0	0	0	0	0	0	0	0	0	0	0	0	0	0	0	0	0	0	0	0	0	0	0	0	0	0	0	0.00568	0	0	0	0	0	0.00846	0	0	0	0	0	0	0	0	0	0	0	0	0	0
d__Bacteria|p__Actinobacteriota|c__Actinobacteria|o__Streptosporangiales|f__Nocardiopsaceae|g__Nocardiopsis	0	0	0	0	0	0	0	0	0	0	0	0	0	0	0	0	0	0	0	0	0	0	0	0	0	0	0	0	0	0	0	0	0	0	0.00846	0	0	0	0	0	0	0	0	0	0	0	0	0	0
d__Bacteria|p__Actinobacteriota|c__Actinobacteria|o__Streptosporangiales|f__Nocardiopsaceae|g__Nocardiopsis|s__Nocardiopsis_unclassified	0	0	0	0	0	0	0	0	0	0	0	0	0	0	0	0	0	0	0	0	0	0	0	0	0	0	0	0	0	0	0	0	0	0	0.00846	0	0	0	0	0	0	0	0	0	0	0	0	0	0
d__Bacteria|p__Actinobacteriota|c__Actinobacteria|o__Streptosporangiales|f__Nocardiopsaceae|g__Thermobifida	0	0	0	0	0	0	0	0	0	0	0	0	0	0	0	0	0	0	0	0	0	0	0	0	0	0	0	0	0.00568	0	0	0	0	0	0	0	0	0	0	0	0	0	0	0	0	0	0	0	0
d__Bacteria|p__Actinobacteriota|c__Actinobacteria|o__Streptosporangiales|f__Nocardiopsaceae|g__Thermobifida|s__Thermobifida_unclassified	0	0	0	0	0	0	0	0	0	0	0	0	0	0	0	0	0	0	0	0	0	0	0	0	0	0	0	0	0.00568	0	0	0	0	0	0	0	0	0	0	0	0	0	0	0	0	0	0	0	0
d__Bacteria|p__Actinobacteriota|c__Actinobacteria|o__Streptosporangiales|f__Thermomonosporaceae	0	0	0	0	0	0	0	0	0	0	0	0	0	0	0	0.0227	0	0	0	0	0	0	0	0.10605	0	0	0	0	0.02649	0	0	0	0	0.0121	0	0	0	0	0	0	0	0	0	0	0	0	0	0	0
d__Bacteria|p__Actinobacteriota|c__Actinobacteria|o__Streptosporangiales|f__Thermomonosporaceae|g__Actinomadura	0	0	0	0	0	0	0	0	0	0	0	0	0	0	0	0.0227	0	0	0	0	0	0	0	0.10605	0	0	0	0	0.02649	0	0	0	0	0.0121	0	0	0	0	0	0	0	0	0	0	0	0	0	0	0
d__Bacteria|p__Actinobacteriota|c__Actinobacteria|o__Streptosporangiales|f__Thermomonosporaceae|g__Actinomadura|s__Actinomadura_unclassified	0	0	0	0	0	0	0	0	0	0	0	0	0	0	0	0.0227	0	0	0	0	0	0	0	0.10605	0	0	0	0	0.02649	0	0	0	0	0.0121	0	0	0	0	0	0	0	0	0	0	0	0	0	0	0
d__Bacteria|p__Actinobacteriota|c__Actinobacteriota	0.9816	0.02129	0	0.12161	0.00354	0	0	0.01814	0.01187	0.01101	0.00385	0.01347	0	0.07768	0	0.02837	0.02168	0.01756	0	0.01981	0.02194	0	0.01894	0.15377	0.10665	0.4329	0.0072	0	0.00757	0.04789	0.30614	0.03504	0	0.01613	0.00564	0.00742	0.03092	0.01565	0.03112	0.01744	0.02507	0.35005	0.22026	0	0.00871	0.01559	0.03657	0.1767	0.02336
d__Bacteria|p__Actinobacteriota|c__Actinobacteriota|o__Actinobacteriota_unclassified	0.40082	0	0	0.12161	0	0	0	0.01814	0	0.01101	0.00385	0	0	0	0	0.01324	0.02168	0.01756	0	0	0	0	0	0	0.10665	0.4027	0.00432	0	0.00757	0.04789	0.2906	0.03504	0	0	0	0.00742	0.00651	0	0.00778	0.00872	0.01114	0.27071	0.17486	0	0	0	0.01662	0.14357	0.01168
d__Bacteria|p__Actinobacteriota|c__Actinobacteriota|o__Actinobacteriota_unclassified|f__Actinobacteriota_unclassified	0.40082	0	0	0.12161	0	0	0	0.01814	0	0.01101	0.00385	0	0	0	0	0.01324	0.02168	0.01756	0	0	0	0	0	0	0.10665	0.4027	0.00432	0	0.00757	0.04789	0.2906	0.03504	0	0	0	0.00742	0.00651	0	0.00778	0.00872	0.01114	0.27071	0.17486	0	0	0	0.01662	0.14357	0.01168
d__Bacteria|p__Actinobacteriota|c__Actinobacteriota|o__Actinobacteriota_unclassified|f__Actinobacteriota_unclassified|g__Actinobacteriota_unclassified	0.40082	0	0	0.12161	0	0	0	0.01814	0	0.01101	0.00385	0	0	0	0	0.01324	0.02168	0.01756	0	0	0	0	0	0	0.10665	0.4027	0.00432	0	0.00757	0.04789	0.2906	0.03504	0	0	0	0.00742	0.00651	0	0.00778	0.00872	0.01114	0.27071	0.17486	0	0	0	0.01662	0.14357	0.01168
d__Bacteria|p__Actinobacteriota|c__Actinobacteriota|o__Actinobacteriota_unclassified|f__Actinobacteriota_unclassified|g__Actinobacteriota_unclassified|s__Actinobacteriota_unclassified	0.40082	0	0	0.12161	0	0	0	0.01814	0	0.01101	0.00385	0	0	0	0	0.01324	0.02168	0.01756	0	0	0	0	0	0	0.10665	0.4027	0.00432	0	0.00757	0.04789	0.2906	0.03504	0	0	0	0.00742	0.00651	0	0.00778	0.00872	0.01114	0.27071	0.17486	0	0	0	0.01662	0.14357	0.01168
d__Bacteria|p__Actinobacteriota|c__Actinobacteriota|o__Actinomycetales	0	0.02129	0	0	0	0	0	0	0	0	0	0	0	0	0	0.01513	0	0	0	0	0	0	0	0	0	0	0	0	0	0	0	0	0	0	0	0	0	0	0	0	0	0	0	0	0	0	0	0.03313	0
d__Bacteria|p__Actinobacteriota|c__Actinobacteriota|o__Actinomycetales|f__Actinomycetales_unclassified	0	0.02129	0	0	0	0	0	0	0	0	0	0	0	0	0	0.01513	0	0	0	0	0	0	0	0	0	0	0	0	0	0	0	0	0	0	0	0	0	0	0	0	0	0	0	0	0	0	0	0.03313	0
d__Bacteria|p__Actinobacteriota|c__Actinobacteriota|o__Actinomycetales|f__Actinomycetales_unclassified|g__Actinomycetales_unclassified	0	0.02129	0	0	0	0	0	0	0	0	0	0	0	0	0	0.01513	0	0	0	0	0	0	0	0	0	0	0	0	0	0	0	0	0	0	0	0	0	0	0	0	0	0	0	0	0	0	0	0.03313	0
d__Bacteria|p__Actinobacteriota|c__Actinobacteriota|o__Actinomycetales|f__Actinomycetales_unclassified|g__Actinomycetales_unclassified|s__Actinomycetales_unclassified	0	0.02129	0	0	0	0	0	0	0	0	0	0	0	0	0	0.01513	0	0	0	0	0	0	0	0	0	0	0	0	0	0	0	0	0	0	0	0	0	0	0	0	0	0	0	0	0	0	0	0.03313	0
d__Bacteria|p__Actinobacteriota|c__Actinobacteriota|o__Corynebacteriales	0	0	0	0	0	0	0	0	0	0	0	0	0	0	0	0	0	0	0	0.01981	0.02194	0	0	0	0	0	0	0	0	0	0	0	0	0	0	0	0	0.00939	0	0	0	0	0	0	0	0.00468	0.01496	0	0.01168
d__Bacteria|p__Actinobacteriota|c__Actinobacteriota|o__Corynebacteriales|f__Corynebacteriaceae	0	0	0	0	0	0	0	0	0	0	0	0	0	0	0	0	0	0	0	0.01981	0.02194	0	0	0	0	0	0	0	0	0	0	0	0	0	0	0	0	0.00939	0	0	0	0	0	0	0	0.00468	0.01496	0	0.01168
d__Bacteria|p__Actinobacteriota|c__Actinobacteriota|o__Corynebacteriales|f__Corynebacteriaceae|g__Corynebacterium	0	0	0	0	0	0	0	0	0	0	0	0	0	0	0	0	0	0	0	0.01981	0.02194	0	0	0	0	0	0	0	0	0	0	0	0	0	0	0	0	0.00939	0	0	0	0	0	0	0	0.00468	0.01496	0	0.01168
d__Bacteria|p__Actinobacteriota|c__Actinobacteriota|o__Corynebacteriales|f__Corynebacteriaceae|g__Corynebacterium|s__Corynebacterium_sp.	0	0	0	0	0	0	0	0	0	0	0	0	0	0	0	0	0	0	0	0	0	0	0	0	0	0	0	0	0	0	0	0	0	0	0	0	0	0	0	0	0	0	0	0	0	0	0.01496	0	0.01168
d__Bacteria|p__Actinobacteriota|c__Actinobacteriota|o__Corynebacteriales|f__Corynebacteriaceae|g__Corynebacterium|s__Corynebacterium_sp._Marseille-P4122	0	0	0	0	0	0	0	0	0	0	0	0	0	0	0	0	0	0	0	0.01981	0.02194	0	0	0	0	0	0	0	0	0	0	0	0	0	0	0	0	0.00939	0	0	0	0	0	0	0	0	0	0	0
d__Bacteria|p__Actinobacteriota|c__Actinobacteriota|o__Corynebacteriales|f__Corynebacteriaceae|g__Corynebacterium|s__Corynebacterium_sp._jw37	0	0	0	0	0	0	0	0	0	0	0	0	0	0	0	0	0	0	0	0	0	0	0	0	0	0	0	0	0	0	0	0	0	0	0	0	0	0	0	0	0	0	0	0	0	0.00468	0	0	0
d__Bacteria|p__Actinobacteriota|c__Actinobacteriota|o__Geodermatophilales	0	0	0	0	0	0	0	0	0	0	0	0	0	0	0	0	0	0	0	0	0	0	0	0	0	0	0	0	0	0	0	0	0	0	0	0	0	0	0	0	0	0	0	0	0	0	0	0	0
d__Bacteria|p__Actinobacteriota|c__Actinobacteriota|o__Geodermatophilales|f__Geodermatophilaceae	0	0	0	0	0	0	0	0	0	0	0	0	0	0	0	0	0	0	0	0	0	0	0	0	0	0	0	0	0	0	0	0	0	0	0	0	0	0	0	0	0	0	0	0	0	0	0	0	0
d__Bacteria|p__Actinobacteriota|c__Actinobacteriota|o__Geodermatophilales|f__Geodermatophilaceae|g__Blastococcus	0	0	0	0	0	0	0	0	0	0	0	0	0	0	0	0	0	0	0	0	0	0	0	0	0	0	0	0	0	0	0	0	0	0	0	0	0	0	0	0	0	0	0	0	0	0	0	0	0
d__Bacteria|p__Actinobacteriota|c__Actinobacteriota|o__Geodermatophilales|f__Geodermatophilaceae|g__Blastococcus|s__Blastococcus_sp._CB_286510	0	0	0	0	0	0	0	0	0	0	0	0	0	0	0	0	0	0	0	0	0	0	0	0	0	0	0	0	0	0	0	0	0	0	0	0	0	0	0	0	0	0	0	0	0	0	0	0	0
d__Bacteria|p__Actinobacteriota|c__Actinobacteriota|o__Geodermatophilales|f__Geodermatophilaceae|g__Geodermatophilus	0	0	0	0	0	0	0	0	0	0	0	0	0	0	0	0	0	0	0	0	0	0	0	0	0	0	0	0	0	0	0	0	0	0	0	0	0	0	0	0	0	0	0	0	0	0	0	0	0
d__Bacteria|p__Actinobacteriota|c__Actinobacteriota|o__Geodermatophilales|f__Geodermatophilaceae|g__Geodermatophilus|s__Geodermatophilus_ruber	0	0	0	0	0	0	0	0	0	0	0	0	0	0	0	0	0	0	0	0	0	0	0	0	0	0	0	0	0	0	0	0	0	0	0	0	0	0	0	0	0	0	0	0	0	0	0	0	0
d__Bacteria|p__Actinobacteriota|c__Actinobacteriota|o__Micrococcales	0.58078	0	0	0	0.00354	0	0	0	0.01187	0	0	0.01347	0	0.07768	0	0	0	0	0	0	0	0	0	0.15377	0	0.0302	0.00288	0	0	0	0.01554	0	0	0.00941	0.00564	0	0.02441	0.00626	0.02334	0.00872	0.01393	0.07001	0.03867	0	0.00871	0.01091	0.00499	0	0
d__Bacteria|p__Actinobacteriota|c__Actinobacteriota|o__Micrococcales|f__Cellulomonadaceae	0	0	0	0	0	0	0	0	0	0	0	0	0	0.07768	0	0	0	0	0	0	0	0	0	0	0	0	0	0	0	0	0	0	0	0	0	0	0	0	0.02334	0	0	0	0	0	0	0	0	0	0
d__Bacteria|p__Actinobacteriota|c__Actinobacteriota|o__Micrococcales|f__Cellulomonadaceae|g__Cellulomonas	0	0	0	0	0	0	0	0	0	0	0	0	0	0.07768	0	0	0	0	0	0	0	0	0	0	0	0	0	0	0	0	0	0	0	0	0	0	0	0	0.02334	0	0	0	0	0	0	0	0	0	0
d__Bacteria|p__Actinobacteriota|c__Actinobacteriota|o__Micrococcales|f__Cellulomonadaceae|g__Cellulomonas|s__Cellulomonas_denverensis	0	0	0	0	0	0	0	0	0	0	0	0	0	0	0	0	0	0	0	0	0	0	0	0	0	0	0	0	0	0	0	0	0	0	0	0	0	0	0.02334	0	0	0	0	0	0	0	0	0	0
d__Bacteria|p__Actinobacteriota|c__Actinobacteriota|o__Micrococcales|f__Cellulomonadaceae|g__Cellulomonas|s__Cellulomonas_hominis	0	0	0	0	0	0	0	0	0	0	0	0	0	0.07768	0	0	0	0	0	0	0	0	0	0	0	0	0	0	0	0	0	0	0	0	0	0	0	0	0	0	0	0	0	0	0	0	0	0	0
d__Bacteria|p__Actinobacteriota|c__Actinobacteriota|o__Micrococcales|f__Intrasporangiaceae	0	0	0	0	0.00354	0	0	0	0.01187	0	0	0	0	0	0	0	0	0	0	0	0	0	0	0	0	0	0	0	0	0	0	0	0	0	0	0	0	0	0	0	0	0	0	0	0	0.01091	0	0	0
d__Bacteria|p__Actinobacteriota|c__Actinobacteriota|o__Micrococcales|f__Intrasporangiaceae|g__Janibacter	0	0	0	0	0	0	0	0	0.01187	0	0	0	0	0	0	0	0	0	0	0	0	0	0	0	0	0	0	0	0	0	0	0	0	0	0	0	0	0	0	0	0	0	0	0	0	0.01091	0	0	0
d__Bacteria|p__Actinobacteriota|c__Actinobacteriota|o__Micrococcales|f__Intrasporangiaceae|g__Janibacter|s__Janibacter_anophelis	0	0	0	0	0	0	0	0	0.01187	0	0	0	0	0	0	0	0	0	0	0	0	0	0	0	0	0	0	0	0	0	0	0	0	0	0	0	0	0	0	0	0	0	0	0	0	0.01091	0	0	0
d__Bacteria|p__Actinobacteriota|c__Actinobacteriota|o__Micrococcales|f__Intrasporangiaceae|g__Janibacter|s__Janibacter_sp._XJ-1	0	0	0	0	0	0	0	0	0	0	0	0	0	0	0	0	0	0	0	0	0	0	0	0	0	0	0	0	0	0	0	0	0	0	0	0	0	0	0	0	0	0	0	0	0	0	0	0	0
d__Bacteria|p__Actinobacteriota|c__Actinobacteriota|o__Micrococcales|f__Intrasporangiaceae|g__Knoellia	0	0	0	0	0	0	0	0	0	0	0	0	0	0	0	0	0	0	0	0	0	0	0	0	0	0	0	0	0	0	0	0	0	0	0	0	0	0	0	0	0	0	0	0	0	0	0	0	0
d__Bacteria|p__Actinobacteriota|c__Actinobacteriota|o__Micrococcales|f__Intrasporangiaceae|g__Knoellia|s__Knoellia_subterranea	0	0	0	0	0	0	0	0	0	0	0	0	0	0	0	0	0	0	0	0	0	0	0	0	0	0	0	0	0	0	0	0	0	0	0	0	0	0	0	0	0	0	0	0	0	0	0	0	0
d__Bacteria|p__Actinobacteriota|c__Actinobacteriota|o__Micrococcales|f__Intrasporangiaceae|g__Kribbia	0	0	0	0	0.00354	0	0	0	0	0	0	0	0	0	0	0	0	0	0	0	0	0	0	0	0	0	0	0	0	0	0	0	0	0	0	0	0	0	0	0	0	0	0	0	0	0	0	0	0
d__Bacteria|p__Actinobacteriota|c__Actinobacteriota|o__Micrococcales|f__Intrasporangiaceae|g__Kribbia|s__Kribbia_sp._AB9	0	0	0	0	0.00354	0	0	0	0	0	0	0	0	0	0	0	0	0	0	0	0	0	0	0	0	0	0	0	0	0	0	0	0	0	0	0	0	0	0	0	0	0	0	0	0	0	0	0	0
d__Bacteria|p__Actinobacteriota|c__Actinobacteriota|o__Micrococcales|f__Intrasporangiaceae|g__Serinicoccus	0	0	0	0	0	0	0	0	0	0	0	0	0	0	0	0	0	0	0	0	0	0	0	0	0	0	0	0	0	0	0	0	0	0	0	0	0	0	0	0	0	0	0	0	0	0	0	0	0
d__Bacteria|p__Actinobacteriota|c__Actinobacteriota|o__Micrococcales|f__Intrasporangiaceae|g__Serinicoccus|s__Serinicoccus_profundi	0	0	0	0	0	0	0	0	0	0	0	0	0	0	0	0	0	0	0	0	0	0	0	0	0	0	0	0	0	0	0	0	0	0	0	0	0	0	0	0	0	0	0	0	0	0	0	0	0
d__Bacteria|p__Actinobacteriota|c__Actinobacteriota|o__Micrococcales|f__Microbacteriaceae	0	0	0	0	0	0	0	0	0	0	0	0.01347	0	0	0	0	0	0	0	0	0	0	0	0.15377	0	0	0.00288	0	0	0	0.01554	0	0	0	0	0	0.01302	0	0	0	0	0	0.03867	0	0	0	0	0	0
d__Bacteria|p__Actinobacteriota|c__Actinobacteriota|o__Micrococcales|f__Microbacteriaceae|g__Curtobacterium	0	0	0	0	0	0	0	0	0	0	0	0	0	0	0	0	0	0	0	0	0	0	0	0	0	0	0	0	0	0	0.01554	0	0	0	0	0	0.01302	0	0	0	0	0	0.03867	0	0	0	0	0	0
d__Bacteria|p__Actinobacteriota|c__Actinobacteriota|o__Micrococcales|f__Microbacteriaceae|g__Curtobacterium|s__Curtobacterium_flaccumfaciens	0	0	0	0	0	0	0	0	0	0	0	0	0	0	0	0	0	0	0	0	0	0	0	0	0	0	0	0	0	0	0.01554	0	0	0	0	0	0.01302	0	0	0	0	0	0.03867	0	0	0	0	0	0
d__Bacteria|p__Actinobacteriota|c__Actinobacteriota|o__Micrococcales|f__Microbacteriaceae|g__Frigoribacterium	0	0	0	0	0	0	0	0	0	0	0	0	0	0	0	0	0	0	0	0	0	0	0	0	0	0	0	0	0	0	0	0	0	0	0	0	0	0	0	0	0	0	0	0	0	0	0	0	0
d__Bacteria|p__Actinobacteriota|c__Actinobacteriota|o__Micrococcales|f__Microbacteriaceae|g__Frigoribacterium|s__uncultured_Frigoribacterium_sp.	0	0	0	0	0	0	0	0	0	0	0	0	0	0	0	0	0	0	0	0	0	0	0	0	0	0	0	0	0	0	0	0	0	0	0	0	0	0	0	0	0	0	0	0	0	0	0	0	0
d__Bacteria|p__Actinobacteriota|c__Actinobacteriota|o__Micrococcales|f__Microbacteriaceae|g__Leucobacter	0	0	0	0	0	0	0	0	0	0	0	0	0	0	0	0	0	0	0	0	0	0	0	0	0	0	0	0	0	0	0	0	0	0	0	0	0	0	0	0	0	0	0	0	0	0	0	0	0
d__Bacteria|p__Actinobacteriota|c__Actinobacteriota|o__Micrococcales|f__Microbacteriaceae|g__Leucobacter|s__Leucobacter_chromiireducens	0	0	0	0	0	0	0	0	0	0	0	0	0	0	0	0	0	0	0	0	0	0	0	0	0	0	0	0	0	0	0	0	0	0	0	0	0	0	0	0	0	0	0	0	0	0	0	0	0
d__Bacteria|p__Actinobacteriota|c__Actinobacteriota|o__Micrococcales|f__Microbacteriaceae|g__Microbacteriaceae_unclassified	0	0	0	0	0	0	0	0	0	0	0	0	0	0	0	0	0	0	0	0	0	0	0	0	0	0	0	0	0	0	0	0	0	0	0	0	0	0	0	0	0	0	0	0	0	0	0	0	0
d__Bacteria|p__Actinobacteriota|c__Actinobacteriota|o__Micrococcales|f__Microbacteriaceae|g__Microbacteriaceae_unclassified|s__Microbacteriaceae_unclassified	0	0	0	0	0	0	0	0	0	0	0	0	0	0	0	0	0	0	0	0	0	0	0	0	0	0	0	0	0	0	0	0	0	0	0	0	0	0	0	0	0	0	0	0	0	0	0	0	0
d__Bacteria|p__Actinobacteriota|c__Actinobacteriota|o__Micrococcales|f__Microbacteriaceae|g__Microbacterium	0	0	0	0	0	0	0	0	0	0	0	0	0	0	0	0	0	0	0	0	0	0	0	0.15377	0	0	0.00288	0	0	0	0	0	0	0	0	0	0	0	0	0	0	0	0	0	0	0	0	0	0
d__Bacteria|p__Actinobacteriota|c__Actinobacteriota|o__Micrococcales|f__Microbacteriaceae|g__Microbacterium|s__Microbacterium_indicum	0	0	0	0	0	0	0	0	0	0	0	0	0	0	0	0	0	0	0	0	0	0	0	0.14582	0	0	0	0	0	0	0	0	0	0	0	0	0	0	0	0	0	0	0	0	0	0	0	0	0
d__Bacteria|p__Actinobacteriota|c__Actinobacteriota|o__Micrococcales|f__Microbacteriaceae|g__Microbacterium|s__Microbacterium_sp._G27	0	0	0	0	0	0	0	0	0	0	0	0	0	0	0	0	0	0	0	0	0	0	0	0.00795	0	0	0	0	0	0	0	0	0	0	0	0	0	0	0	0	0	0	0	0	0	0	0	0	0
d__Bacteria|p__Actinobacteriota|c__Actinobacteriota|o__Micrococcales|f__Microbacteriaceae|g__Microbacterium|s__Microbacterium_sp._ZY-2006b	0	0	0	0	0	0	0	0	0	0	0	0	0	0	0	0	0	0	0	0	0	0	0	0	0	0	0.00288	0	0	0	0	0	0	0	0	0	0	0	0	0	0	0	0	0	0	0	0	0	0
d__Bacteria|p__Actinobacteriota|c__Actinobacteriota|o__Micrococcales|f__Microbacteriaceae|g__Salinibacterium	0	0	0	0	0	0	0	0	0	0	0	0.01347	0	0	0	0	0	0	0	0	0	0	0	0	0	0	0	0	0	0	0	0	0	0	0	0	0	0	0	0	0	0	0	0	0	0	0	0	0
d__Bacteria|p__Actinobacteriota|c__Actinobacteriota|o__Micrococcales|f__Microbacteriaceae|g__Salinibacterium|s__Salinibacterium_sp.	0	0	0	0	0	0	0	0	0	0	0	0.01347	0	0	0	0	0	0	0	0	0	0	0	0	0	0	0	0	0	0	0	0	0	0	0	0	0	0	0	0	0	0	0	0	0	0	0	0	0
d__Bacteria|p__Actinobacteriota|c__Actinobacteriota|o__Micrococcales|f__Micrococcaceae	0.58078	0	0	0	0	0	0	0	0	0	0	0	0	0	0	0	0	0	0	0	0	0	0	0	0	0.0302	0	0	0	0	0	0	0	0.00941	0.00564	0	0.01139	0.00626	0	0.00872	0.01393	0.07001	0	0	0.00871	0	0.00499	0	0
d__Bacteria|p__Actinobacteriota|c__Actinobacteriota|o__Micrococcales|f__Micrococcaceae|g__Arthrobacter	0.58078	0	0	0	0	0	0	0	0	0	0	0	0	0	0	0	0	0	0	0	0	0	0	0	0	0	0	0	0	0	0	0	0	0.00941	0.00564	0	0.01139	0.00626	0	0.00872	0.01393	0.07001	0	0	0.00871	0	0.00499	0	0
d__Bacteria|p__Actinobacteriota|c__Actinobacteriota|o__Micrococcales|f__Micrococcaceae|g__Arthrobacter|s__Arthrobacter_globiformis	0	0	0	0	0	0	0	0	0	0	0	0	0	0	0	0	0	0	0	0	0	0	0	0	0	0	0	0	0	0	0	0	0	0	0	0	0	0	0	0	0.01393	0	0	0	0	0	0	0	0
d__Bacteria|p__Actinobacteriota|c__Actinobacteriota|o__Micrococcales|f__Micrococcaceae|g__Arthrobacter|s__Arthrobacter_rhombi	0	0	0	0	0	0	0	0	0	0	0	0	0	0	0	0	0	0	0	0	0	0	0	0	0	0	0	0	0	0	0	0	0	0	0	0	0	0	0	0	0	0	0	0	0	0	0	0	0
d__Bacteria|p__Actinobacteriota|c__Actinobacteriota|o__Micrococcales|f__Micrococcaceae|g__Arthrobacter|s__Arthrobacter_sp._HJ4	0	0	0	0	0	0	0	0	0	0	0	0	0	0	0	0	0	0	0	0	0	0	0	0	0	0	0	0	0	0	0	0	0	0.00941	0	0	0	0	0	0	0	0	0	0	0	0	0	0	0
d__Bacteria|p__Actinobacteriota|c__Actinobacteriota|o__Micrococcales|f__Micrococcaceae|g__Arthrobacter|s__Arthrobacter_sp._NW-2013-Rh11	0.58078	0	0	0	0	0	0	0	0	0	0	0	0	0	0	0	0	0	0	0	0	0	0	0	0	0	0	0	0	0	0	0	0	0	0.00564	0	0.01139	0.00626	0	0.00872	0	0.07001	0	0	0	0	0.00499	0	0
d__Bacteria|p__Actinobacteriota|c__Actinobacteriota|o__Micrococcales|f__Micrococcaceae|g__Arthrobacter|s__Arthrobacter_sp._Z63zhy	0	0	0	0	0	0	0	0	0	0	0	0	0	0	0	0	0	0	0	0	0	0	0	0	0	0	0	0	0	0	0	0	0	0	0	0	0	0	0	0	0	0	0	0	0.00871	0	0	0	0
d__Bacteria|p__Actinobacteriota|c__Actinobacteriota|o__Micrococcales|f__Micrococcaceae|g__Kocuria	0	0	0	0	0	0	0	0	0	0	0	0	0	0	0	0	0	0	0	0	0	0	0	0	0	0	0	0	0	0	0	0	0	0	0	0	0	0	0	0	0	0	0	0	0	0	0	0	0
d__Bacteria|p__Actinobacteriota|c__Actinobacteriota|o__Micrococcales|f__Micrococcaceae|g__Kocuria|s__Kocuria_sp._10-4DEP	0	0	0	0	0	0	0	0	0	0	0	0	0	0	0	0	0	0	0	0	0	0	0	0	0	0	0	0	0	0	0	0	0	0	0	0	0	0	0	0	0	0	0	0	0	0	0	0	0
d__Bacteria|p__Actinobacteriota|c__Actinobacteriota|o__Micrococcales|f__Micrococcaceae|g__Yaniella	0	0	0	0	0	0	0	0	0	0	0	0	0	0	0	0	0	0	0	0	0	0	0	0	0	0.0302	0	0	0	0	0	0	0	0	0	0	0	0	0	0	0	0	0	0	0	0	0	0	0
d__Bacteria|p__Actinobacteriota|c__Actinobacteriota|o__Micrococcales|f__Micrococcaceae|g__Yaniella|s__uncultured_Yaniella_sp.	0	0	0	0	0	0	0	0	0	0	0	0	0	0	0	0	0	0	0	0	0	0	0	0	0	0.0302	0	0	0	0	0	0	0	0	0	0	0	0	0	0	0	0	0	0	0	0	0	0	0
d__Bacteria|p__Actinobacteriota|c__Actinobacteriota|o__Micromonosporales	0	0	0	0	0	0	0	0	0	0	0	0	0	0	0	0	0	0	0	0	0	0	0	0	0	0	0	0	0	0	0	0	0	0	0	0	0	0	0	0	0	0	0	0	0	0	0	0	0
d__Bacteria|p__Actinobacteriota|c__Actinobacteriota|o__Micromonosporales|f__Micromonosporaceae	0	0	0	0	0	0	0	0	0	0	0	0	0	0	0	0	0	0	0	0	0	0	0	0	0	0	0	0	0	0	0	0	0	0	0	0	0	0	0	0	0	0	0	0	0	0	0	0	0
d__Bacteria|p__Actinobacteriota|c__Actinobacteriota|o__Micromonosporales|f__Micromonosporaceae|g__Micromonospora	0	0	0	0	0	0	0	0	0	0	0	0	0	0	0	0	0	0	0	0	0	0	0	0	0	0	0	0	0	0	0	0	0	0	0	0	0	0	0	0	0	0	0	0	0	0	0	0	0
d__Bacteria|p__Actinobacteriota|c__Actinobacteriota|o__Micromonosporales|f__Micromonosporaceae|g__Micromonospora|s__Micromonospora_chersina	0	0	0	0	0	0	0	0	0	0	0	0	0	0	0	0	0	0	0	0	0	0	0	0	0	0	0	0	0	0	0	0	0	0	0	0	0	0	0	0	0	0	0	0	0	0	0	0	0
d__Bacteria|p__Actinobacteriota|c__Actinobacteriota|o__Propionibacteriales	0	0	0	0	0	0	0	0	0	0	0	0	0	0	0	0	0	0	0	0	0	0	0	0	0	0	0	0	0	0	0	0	0	0.00269	0	0	0	0	0	0	0	0	0	0	0	0	0	0	0
d__Bacteria|p__Actinobacteriota|c__Actinobacteriota|o__Propionibacteriales|f__Nocardioidaceae	0	0	0	0	0	0	0	0	0	0	0	0	0	0	0	0	0	0	0	0	0	0	0	0	0	0	0	0	0	0	0	0	0	0.00269	0	0	0	0	0	0	0	0	0	0	0	0	0	0	0
d__Bacteria|p__Actinobacteriota|c__Actinobacteriota|o__Propionibacteriales|f__Nocardioidaceae|g__Propionicimonas	0	0	0	0	0	0	0	0	0	0	0	0	0	0	0	0	0	0	0	0	0	0	0	0	0	0	0	0	0	0	0	0	0	0.00269	0	0	0	0	0	0	0	0	0	0	0	0	0	0	0
d__Bacteria|p__Actinobacteriota|c__Actinobacteriota|o__Propionibacteriales|f__Nocardioidaceae|g__Propionicimonas|s__Propionicimonas_sp.	0	0	0	0	0	0	0	0	0	0	0	0	0	0	0	0	0	0	0	0	0	0	0	0	0	0	0	0	0	0	0	0	0	0.00269	0	0	0	0	0	0	0	0	0	0	0	0	0	0	0
d__Bacteria|p__Actinobacteriota|c__Actinobacteriota|o__Propionibacteriales|f__Propionibacteriaceae	0	0	0	0	0	0	0	0	0	0	0	0	0	0	0	0	0	0	0	0	0	0	0	0	0	0	0	0	0	0	0	0	0	0	0	0	0	0	0	0	0	0	0	0	0	0	0	0	0
d__Bacteria|p__Actinobacteriota|c__Actinobacteriota|o__Propionibacteriales|f__Propionibacteriaceae|g__Cutibacterium	0	0	0	0	0	0	0	0	0	0	0	0	0	0	0	0	0	0	0	0	0	0	0	0	0	0	0	0	0	0	0	0	0	0	0	0	0	0	0	0	0	0	0	0	0	0	0	0	0
d__Bacteria|p__Actinobacteriota|c__Actinobacteriota|o__Propionibacteriales|f__Propionibacteriaceae|g__Cutibacterium|s__Cutibacterium_avidum	0	0	0	0	0	0	0	0	0	0	0	0	0	0	0	0	0	0	0	0	0	0	0	0	0	0	0	0	0	0	0	0	0	0	0	0	0	0	0	0	0	0	0	0	0	0	0	0	0
d__Bacteria|p__Actinobacteriota|c__Actinobacteriota|o__Propionibacteriales|f__Propionibacteriaceae|g__Propionibacteriaceae_unclassified	0	0	0	0	0	0	0	0	0	0	0	0	0	0	0	0	0	0	0	0	0	0	0	0	0	0	0	0	0	0	0	0	0	0	0	0	0	0	0	0	0	0	0	0	0	0	0	0	0
d__Bacteria|p__Actinobacteriota|c__Actinobacteriota|o__Propionibacteriales|f__Propionibacteriaceae|g__Propionibacteriaceae_unclassified|s__Propionibacteriaceae_unclassified	0	0	0	0	0	0	0	0	0	0	0	0	0	0	0	0	0	0	0	0	0	0	0	0	0	0	0	0	0	0	0	0	0	0	0	0	0	0	0	0	0	0	0	0	0	0	0	0	0
d__Bacteria|p__Actinobacteriota|c__Actinobacteriota|o__Propionibacteriales|f__Propionibacteriaceae|g__Propionibacterium	0	0	0	0	0	0	0	0	0	0	0	0	0	0	0	0	0	0	0	0	0	0	0	0	0	0	0	0	0	0	0	0	0	0	0	0	0	0	0	0	0	0	0	0	0	0	0	0	0
d__Bacteria|p__Actinobacteriota|c__Actinobacteriota|o__Propionibacteriales|f__Propionibacteriaceae|g__Propionibacterium|s__Propionibacterium_sp._S189	0	0	0	0	0	0	0	0	0	0	0	0	0	0	0	0	0	0	0	0	0	0	0	0	0	0	0	0	0	0	0	0	0	0	0	0	0	0	0	0	0	0	0	0	0	0	0	0	0
d__Bacteria|p__Actinobacteriota|c__Actinobacteriota|o__Pseudonocardiales	0	0	0	0	0	0	0	0	0	0	0	0	0	0	0	0	0	0	0	0	0	0	0.01894	0	0	0	0	0	0	0	0	0	0	0	0	0	0	0	0	0	0	0.00933	0	0	0	0	0	0	0
d__Bacteria|p__Actinobacteriota|c__Actinobacteriota|o__Pseudonocardiales|f__Pseudonocardiaceae	0	0	0	0	0	0	0	0	0	0	0	0	0	0	0	0	0	0	0	0	0	0	0.01894	0	0	0	0	0	0	0	0	0	0	0	0	0	0	0	0	0	0	0.00933	0	0	0	0	0	0	0
d__Bacteria|p__Actinobacteriota|c__Actinobacteriota|o__Pseudonocardiales|f__Pseudonocardiaceae|g__Kutzneria	0	0	0	0	0	0	0	0	0	0	0	0	0	0	0	0	0	0	0	0	0	0	0.01894	0	0	0	0	0	0	0	0	0	0	0	0	0	0	0	0	0	0	0.00933	0	0	0	0	0	0	0
d__Bacteria|p__Actinobacteriota|c__Actinobacteriota|o__Pseudonocardiales|f__Pseudonocardiaceae|g__Kutzneria|s__uncultured_Kutzneria_sp.	0	0	0	0	0	0	0	0	0	0	0	0	0	0	0	0	0	0	0	0	0	0	0.01894	0	0	0	0	0	0	0	0	0	0	0	0	0	0	0	0	0	0	0.00933	0	0	0	0	0	0	0
d__Bacteria|p__Actinobacteriota|c__Actinobacteriota|o__Streptomycetales	0	0	0	0	0	0	0	0	0	0	0	0	0	0	0	0	0	0	0	0	0	0	0	0	0	0	0	0	0	0	0	0	0	0.00403	0	0	0	0	0	0	0	0	0.00673	0	0	0	0	0	0
d__Bacteria|p__Actinobacteriota|c__Actinobacteriota|o__Streptomycetales|f__Streptomycetaceae	0	0	0	0	0	0	0	0	0	0	0	0	0	0	0	0	0	0	0	0	0	0	0	0	0	0	0	0	0	0	0	0	0	0.00403	0	0	0	0	0	0	0	0	0.00673	0	0	0	0	0	0
d__Bacteria|p__Actinobacteriota|c__Actinobacteriota|o__Streptomycetales|f__Streptomycetaceae|g__Streptomyces	0	0	0	0	0	0	0	0	0	0	0	0	0	0	0	0	0	0	0	0	0	0	0	0	0	0	0	0	0	0	0	0	0	0.00403	0	0	0	0	0	0	0	0	0.00673	0	0	0	0	0	0
d__Bacteria|p__Actinobacteriota|c__Actinobacteriota|o__Streptomycetales|f__Streptomycetaceae|g__Streptomyces|s__Streptomyces_griseoplanus	0	0	0	0	0	0	0	0	0	0	0	0	0	0	0	0	0	0	0	0	0	0	0	0	0	0	0	0	0	0	0	0	0	0.00403	0	0	0	0	0	0	0	0	0	0	0	0	0	0	0
d__Bacteria|p__Actinobacteriota|c__Actinobacteriota|o__Streptomycetales|f__Streptomycetaceae|g__Streptomyces|s__Streptomyces_sp._SD-4	0	0	0	0	0	0	0	0	0	0	0	0	0	0	0	0	0	0	0	0	0	0	0	0	0	0	0	0	0	0	0	0	0	0	0	0	0	0	0	0	0	0	0.00673	0	0	0	0	0	0
d__Bacteria|p__Actinobacteriota|c__Coriobacteriia	0.02454	1.93017	0.12773	0.04292	0.16301	0.05663	0.0816	0.0665	0.05428	0.02202	0.46966	0.62731	0.25776	0.26891	0.28224	0.50129	0.66245	0.28527	0.40207	0.72314	0.35103	0.45379	0.18307	0.17233	0.17775	0.28189	0.09502	0.02487	0.23272	0	0.00466	0.13874	0.0415	0.01345	0.07188	0.20763	0.73412	0.96916	0.17633	0	0	0.24271	0.03362	0	0.09149	0.40994	0.78631	0.4887	0.81767
d__Bacteria|p__Actinobacteriota|c__Coriobacteriia|o__Coriobacteriales	0.02454	1.93017	0.12773	0.04292	0.16301	0.05663	0.0816	0.0665	0.05428	0.02202	0.44271	0.60999	0.24558	0.26891	0.28224	0.50129	0.66245	0.28527	0.40207	0.72314	0.35103	0.45379	0.18307	0.17233	0.17775	0.28189	0.09502	0.02487	0.23272	0	0.00466	0.13874	0.0415	0.01345	0.07188	0.20763	0.73412	0.96916	0.17633	0	0	0.24271	0.03362	0	0.09149	0.40994	0.78631	0.4887	0.81767
d__Bacteria|p__Actinobacteriota|c__Coriobacteriia|o__Coriobacteriales|f__Atopobiaceae	0	1.93017	0	0	0.02126	0	0.0816	0.0665	0	0	0	0	0	0	0	0	0.01927	0.03072	0	0	0	0.01344	0	0	0	0	0.05759	0	0	0	0	0	0.00319	0.00538	0.05074	0.20763	0.02279	0.00783	0.17633	0	0	0	0.03362	0	0.02614	0.2416	0.03491	0.07455	0.02169
d__Bacteria|p__Actinobacteriota|c__Coriobacteriia|o__Coriobacteriales|f__Atopobiaceae|g__Atopobiaceae_unclassified	0	0	0	0	0	0	0	0	0	0	0	0	0	0	0	0	0	0.00878	0	0	0	0	0	0	0	0	0	0	0	0	0	0	0	0	0	0.19033	0	0	0	0	0	0	0	0	0	0	0	0	0
d__Bacteria|p__Actinobacteriota|c__Coriobacteriia|o__Coriobacteriales|f__Atopobiaceae|g__Atopobiaceae_unclassified|s__Atopobiaceae_unclassified	0	0	0	0	0	0	0	0	0	0	0	0	0	0	0	0	0	0.00878	0	0	0	0	0	0	0	0	0	0	0	0	0	0	0	0	0	0.19033	0	0	0	0	0	0	0	0	0	0	0	0	0
d__Bacteria|p__Actinobacteriota|c__Coriobacteriia|o__Coriobacteriales|f__Atopobiaceae|g__Atopobium	0	1.93017	0	0	0.02126	0	0.0816	0.0665	0	0	0	0	0	0	0	0	0.01927	0.02194	0	0	0	0.01344	0	0	0	0	0.04895	0	0	0	0	0	0.00319	0.00538	0.05074	0.0173	0.02279	0.00783	0.17633	0	0	0	0.03362	0	0.01743	0.2416	0.03491	0.07455	0.02169
d__Bacteria|p__Actinobacteriota|c__Coriobacteriia|o__Coriobacteriales|f__Atopobiaceae|g__Atopobium|s__Atopobium_fossor	0	0	0	0	0	0	0	0	0	0	0	0	0	0	0	0	0	0	0	0	0	0	0	0	0	0	0	0	0	0	0	0	0	0	0	0	0	0	0	0	0	0	0.01849	0	0	0	0	0	0
d__Bacteria|p__Actinobacteriota|c__Coriobacteriia|o__Coriobacteriales|f__Atopobiaceae|g__Atopobium|s__Atopobium_parvulum	0	0	0	0	0	0	0	0	0	0	0	0	0	0	0	0	0	0	0	0	0	0	0	0	0	0	0.04175	0	0	0	0	0	0	0	0	0	0	0	0	0	0	0	0	0	0	0	0	0	0
d__Bacteria|p__Actinobacteriota|c__Coriobacteriia|o__Coriobacteriales|f__Atopobiaceae|g__Atopobium|s__Atopobium_unclassified	0	0.07096	0	0	0	0	0.0816	0.0665	0	0	0	0	0	0	0	0	0	0.02194	0	0	0	0.00504	0	0	0	0	0	0	0	0	0	0	0.00319	0.00538	0	0.0173	0.02279	0.00783	0.17633	0	0	0	0	0	0	0.2416	0.03491	0.04694	0.02169
d__Bacteria|p__Actinobacteriota|c__Coriobacteriia|o__Coriobacteriales|f__Atopobiaceae|g__Atopobium|s__Atopobium_vaginae	0	1.85921	0	0	0.01063	0	0	0	0	0	0	0	0	0	0	0	0	0	0	0	0	0.0084	0	0	0	0	0	0	0	0	0	0	0	0	0	0	0	0	0	0	0	0	0	0	0	0	0	0	0
d__Bacteria|p__Actinobacteriota|c__Coriobacteriia|o__Coriobacteriales|f__Atopobiaceae|g__Atopobium|s__uncultured_Atopobium_sp.	0	0	0	0	0.01063	0	0	0	0	0	0	0	0	0	0	0	0.01927	0	0	0	0	0	0	0	0	0	0.0072	0	0	0	0	0	0	0	0.05074	0	0	0	0	0	0	0	0.01513	0	0.01743	0	0	0.02761	0
d__Bacteria|p__Actinobacteriota|c__Coriobacteriia|o__Coriobacteriales|f__Atopobiaceae|g__Coriobacteriaceae_UCG-002	0	0	0	0	0	0	0	0	0	0	0	0	0	0	0	0	0	0	0	0	0	0	0	0	0	0	0	0	0	0	0	0	0	0	0	0	0	0	0	0	0	0	0	0	0.00871	0	0	0	0
d__Bacteria|p__Actinobacteriota|c__Coriobacteriia|o__Coriobacteriales|f__Atopobiaceae|g__Coriobacteriaceae_UCG-002|s__Coriobacteriaceae_UCG-002_unclassified	0	0	0	0	0	0	0	0	0	0	0	0	0	0	0	0	0	0	0	0	0	0	0	0	0	0	0	0	0	0	0	0	0	0	0	0	0	0	0	0	0	0	0	0	0.00871	0	0	0	0
d__Bacteria|p__Actinobacteriota|c__Coriobacteriia|o__Coriobacteriales|f__Atopobiaceae|g__Olsenella	0	0	0	0	0	0	0	0	0	0	0	0	0	0	0	0	0	0	0	0	0	0	0	0	0	0	0.00864	0	0	0	0	0	0	0	0	0	0	0	0	0	0	0	0	0	0	0	0	0	0
d__Bacteria|p__Actinobacteriota|c__Coriobacteriia|o__Coriobacteriales|f__Atopobiaceae|g__Olsenella|s__Olsenella_scatoligenes	0	0	0	0	0	0	0	0	0	0	0	0	0	0	0	0	0	0	0	0	0	0	0	0	0	0	0	0	0	0	0	0	0	0	0	0	0	0	0	0	0	0	0	0	0	0	0	0	0
d__Bacteria|p__Actinobacteriota|c__Coriobacteriia|o__Coriobacteriales|f__Atopobiaceae|g__Olsenella|s__Olsenella_sp._F0004	0	0	0	0	0	0	0	0	0	0	0	0	0	0	0	0	0	0	0	0	0	0	0	0	0	0	0	0	0	0	0	0	0	0	0	0	0	0	0	0	0	0	0	0	0	0	0	0	0
d__Bacteria|p__Actinobacteriota|c__Coriobacteriia|o__Coriobacteriales|f__Atopobiaceae|g__Olsenella|s__Olsenella_sp._F0206	0	0	0	0	0	0	0	0	0	0	0	0	0	0	0	0	0	0	0	0	0	0	0	0	0	0	0.00864	0	0	0	0	0	0	0	0	0	0	0	0	0	0	0	0	0	0	0	0	0	0
d__Bacteria|p__Actinobacteriota|c__Coriobacteriia|o__Coriobacteriales|f__Coriobacteriaceae	0.02454	0	0.12773	0.04292	0.14175	0.05204	0	0	0.04919	0	0.39267	0.54649	0.2334	0.24102	0.08451	0.05297	0.60945	0.24358	0.38832	0.49365	0.2869	0.42522	0.18307	0.17233	0.16353	0	0	0	0	0	0.00466	0.13874	0.00798	0	0	0	0.71133	0.96133	0	0	0	0.24271	0	0	0.05664	0.15743	0.70984	0.35341	0.74926
d__Bacteria|p__Actinobacteriota|c__Coriobacteriia|o__Coriobacteriales|f__Coriobacteriaceae|g__Collinsella	0.02454	0	0.12773	0.04292	0.14175	0.05204	0	0	0.04919	0	0.39267	0.54649	0.2334	0.24102	0.08451	0.05297	0.60945	0.23919	0.38832	0.49365	0.2869	0.42522	0.18307	0.17233	0.16353	0	0	0	0	0	0.00466	0.13874	0.00798	0	0	0	0.71133	0.96133	0	0	0	0.24271	0	0	0.05664	0.15743	0.70984	0.35341	0.74926
d__Bacteria|p__Actinobacteriota|c__Coriobacteriia|o__Coriobacteriales|f__Coriobacteriaceae|g__Collinsella|s__Collinsella_intestinalis	0	0	0	0	0	0	0	0	0	0	0	0	0	0	0	0	0	0	0	0	0	0	0	0	0	0	0	0	0	0	0.00466	0	0	0	0	0	0	0	0	0	0	0	0	0	0.05664	0.15743	0.70984	0.35341	0.74926
d__Bacteria|p__Actinobacteriota|c__Coriobacteriia|o__Coriobacteriales|f__Coriobacteriaceae|g__Collinsella|s__Collinsella_phocaeensis	0	0	0	0	0	0	0	0	0	0	0	0	0	0	0	0	0	0	0	0	0	0	0	0	0	0	0	0	0	0	0	0	0	0	0	0	0	0	0	0	0	0	0	0	0	0	0	0	0
d__Bacteria|p__Actinobacteriota|c__Coriobacteriia|o__Coriobacteriales|f__Coriobacteriaceae|g__Collinsella|s__Collinsella_unclassified	0.02454	0	0.12773	0.04292	0.14175	0.05204	0	0	0.04919	0	0.39267	0.54649	0.2334	0.24102	0.08451	0.05297	0.60945	0.23919	0.38832	0.49365	0.2869	0.42522	0.18307	0.17233	0.16353	0	0	0	0	0	0	0.13874	0.00798	0	0	0	0.71133	0.96133	0	0	0	0.24271	0	0	0	0	0	0	0
d__Bacteria|p__Actinobacteriota|c__Coriobacteriia|o__Coriobacteriales|f__Coriobacteriaceae|g__Enorma	0	0	0	0	0	0	0	0	0	0	0	0	0	0	0	0	0	0.00439	0	0	0	0	0	0	0	0	0	0	0	0	0	0	0	0	0	0	0	0	0	0	0	0	0	0	0	0	0	0	0
d__Bacteria|p__Actinobacteriota|c__Coriobacteriia|o__Coriobacteriales|f__Coriobacteriaceae|g__Enorma|s__Enorma_massiliensis	0	0	0	0	0	0	0	0	0	0	0	0	0	0	0	0	0	0.00439	0	0	0	0	0	0	0	0	0	0	0	0	0	0	0	0	0	0	0	0	0	0	0	0	0	0	0	0	0	0	0
d__Bacteria|p__Actinobacteriota|c__Coriobacteriia|o__Coriobacteriales|f__Coriobacteriales_Incertae_Sedis	0	0	0	0	0	0	0	0	0.00509	0	0	0	0	0.01793	0	0	0.00723	0	0	0	0	0	0	0	0	0	0	0	0	0	0	0	0	0	0	0	0	0	0	0	0	0	0	0	0	0	0	0	0
d__Bacteria|p__Actinobacteriota|c__Coriobacteriia|o__Coriobacteriales|f__Coriobacteriales_Incertae_Sedis|g__Coriobacteriales_Incertae_Sedis_unclassified	0	0	0	0	0	0	0	0	0	0	0	0	0	0.01793	0	0	0.00723	0	0	0	0	0	0	0	0	0	0	0	0	0	0	0	0	0	0	0	0	0	0	0	0	0	0	0	0	0	0	0	0
d__Bacteria|p__Actinobacteriota|c__Coriobacteriia|o__Coriobacteriales|f__Coriobacteriales_Incertae_Sedis|g__Coriobacteriales_Incertae_Sedis_unclassified|s__Coriobacteriales_Incertae_Sedis_unclassified	0	0	0	0	0	0	0	0	0	0	0	0	0	0.01793	0	0	0.00723	0	0	0	0	0	0	0	0	0	0	0	0	0	0	0	0	0	0	0	0	0	0	0	0	0	0	0	0	0	0	0	0
d__Bacteria|p__Actinobacteriota|c__Coriobacteriia|o__Coriobacteriales|f__Coriobacteriales_Incertae_Sedis|g__Raoultibacter	0	0	0	0	0	0	0	0	0.00509	0	0	0	0	0	0	0	0	0	0	0	0	0	0	0	0	0	0	0	0	0	0	0	0	0	0	0	0	0	0	0	0	0	0	0	0	0	0	0	0
d__Bacteria|p__Actinobacteriota|c__Coriobacteriia|o__Coriobacteriales|f__Coriobacteriales_Incertae_Sedis|g__Raoultibacter|s__Raoultibacter_unclassified	0	0	0	0	0	0	0	0	0.00509	0	0	0	0	0	0	0	0	0	0	0	0	0	0	0	0	0	0	0	0	0	0	0	0	0	0	0	0	0	0	0	0	0	0	0	0	0	0	0	0
d__Bacteria|p__Actinobacteriota|c__Coriobacteriia|o__Coriobacteriales|f__Eggerthellaceae	0	0	0	0	0	0.00459	0	0	0	0.02202	0.05004	0.0635	0.01218	0.00996	0.19773	0.44832	0.0265	0.01097	0.01375	0.22949	0.06413	0.01513	0	0	0.01422	0.28189	0.03743	0.02487	0.23272	0	0	0	0.03033	0.00807	0.02114	0	0	0	0	0	0	0	0	0	0.00871	0.01091	0.04156	0.06074	0.04672
d__Bacteria|p__Actinobacteriota|c__Coriobacteriia|o__Coriobacteriales|f__Eggerthellaceae|g__Adlercreutzia	0	0	0	0	0	0.00459	0	0	0	0	0	0	0	0	0	0	0.0265	0	0	0	0	0	0	0	0	0.28189	0	0	0	0	0	0	0	0	0	0	0	0	0	0	0	0	0	0	0	0	0	0	0
d__Bacteria|p__Actinobacteriota|c__Coriobacteriia|o__Coriobacteriales|f__Eggerthellaceae|g__Adlercreutzia|s__Adlercreutzia_unclassified	0	0	0	0	0	0.00459	0	0	0	0	0	0	0	0	0	0	0.0265	0	0	0	0	0	0	0	0	0.28189	0	0	0	0	0	0	0	0	0	0	0	0	0	0	0	0	0	0	0	0	0	0	0
d__Bacteria|p__Actinobacteriota|c__Coriobacteriia|o__Coriobacteriales|f__Eggerthellaceae|g__Eggerthella	0	0	0	0	0	0	0	0	0	0.02202	0.03272	0.0635	0.01218	0.00996	0.1467	0.44832	0	0.01097	0	0	0	0	0	0	0.01422	0	0.03743	0.01954	0.23272	0	0	0	0.03033	0	0.02114	0	0	0	0	0	0	0	0	0	0	0	0	0	0
d__Bacteria|p__Actinobacteriota|c__Coriobacteriia|o__Coriobacteriales|f__Eggerthellaceae|g__Eggerthella|s__Eggerthella_unclassified	0	0	0	0	0	0	0	0	0	0.02202	0.03272	0.0635	0.01218	0.00996	0.1467	0.44832	0	0.01097	0	0	0	0	0	0	0.01422	0	0.03743	0.01954	0.23272	0	0	0	0.03033	0	0.02114	0	0	0	0	0	0	0	0	0	0	0	0	0	0
d__Bacteria|p__Actinobacteriota|c__Coriobacteriia|o__Coriobacteriales|f__Eggerthellaceae|g__Enterorhabdus	0	0	0	0	0	0	0	0	0	0	0	0	0	0	0.05103	0	0	0	0	0	0	0	0	0	0	0	0	0.00533	0	0	0	0	0	0	0	0	0	0	0	0	0	0	0	0	0.00871	0	0	0	0
d__Bacteria|p__Actinobacteriota|c__Coriobacteriia|o__Coriobacteriales|f__Eggerthellaceae|g__Enterorhabdus|s__Enterorhabdus_unclassified	0	0	0	0	0	0	0	0	0	0	0	0	0	0	0.05103	0	0	0	0	0	0	0	0	0	0	0	0	0.00533	0	0	0	0	0	0	0	0	0	0	0	0	0	0	0	0	0.00871	0	0	0	0
d__Bacteria|p__Actinobacteriota|c__Coriobacteriia|o__Coriobacteriales|f__Eggerthellaceae|g__Gordonibacter	0	0	0	0	0	0	0	0	0	0	0.01732	0	0	0	0	0	0	0	0	0	0	0	0	0	0	0	0	0	0	0	0	0	0	0	0	0	0	0	0	0	0	0	0	0	0	0	0	0	0
d__Bacteria|p__Actinobacteriota|c__Coriobacteriia|o__Coriobacteriales|f__Eggerthellaceae|g__Gordonibacter|s__Gordonibacter_unclassified	0	0	0	0	0	0	0	0	0	0	0.01732	0	0	0	0	0	0	0	0	0	0	0	0	0	0	0	0	0	0	0	0	0	0	0	0	0	0	0	0	0	0	0	0	0	0	0	0	0	0
d__Bacteria|p__Actinobacteriota|c__Coriobacteriia|o__Coriobacteriales|f__Eggerthellaceae|g__Paraeggerthella	0	0	0	0	0	0	0	0	0	0	0	0	0	0	0	0	0	0	0	0	0	0	0	0	0	0	0	0	0	0	0	0	0	0.00807	0	0	0	0	0	0	0	0	0	0	0	0	0	0	0
d__Bacteria|p__Actinobacteriota|c__Coriobacteriia|o__Coriobacteriales|f__Eggerthellaceae|g__Paraeggerthella|s__Paraeggerthella_unclassified	0	0	0	0	0	0	0	0	0	0	0	0	0	0	0	0	0	0	0	0	0	0	0	0	0	0	0	0	0	0	0	0	0	0.00807	0	0	0	0	0	0	0	0	0	0	0	0	0	0	0
d__Bacteria|p__Actinobacteriota|c__Coriobacteriia|o__Coriobacteriales|f__Eggerthellaceae|g__Senegalimassilia	0	0	0	0	0	0	0	0	0	0	0	0	0	0	0	0	0	0	0	0	0	0	0	0	0	0	0	0	0	0	0	0	0	0	0	0	0	0	0	0	0	0	0	0	0	0	0.00831	0	0.01001
d__Bacteria|p__Actinobacteriota|c__Coriobacteriia|o__Coriobacteriales|f__Eggerthellaceae|g__Senegalimassilia|s__Senegalimassilia_unclassified	0	0	0	0	0	0	0	0	0	0	0	0	0	0	0	0	0	0	0	0	0	0	0	0	0	0	0	0	0	0	0	0	0	0	0	0	0	0	0	0	0	0	0	0	0	0	0.00831	0	0.01001
d__Bacteria|p__Actinobacteriota|c__Coriobacteriia|o__Coriobacteriales|f__Eggerthellaceae|g__Slackia	0	0	0	0	0	0	0	0	0	0	0	0	0	0	0	0	0	0	0.01375	0.22949	0.06413	0.01513	0	0	0	0	0	0	0	0	0	0	0	0	0	0	0	0	0	0	0	0	0	0	0	0.01091	0.03325	0.06074	0.03671
d__Bacteria|p__Actinobacteriota|c__Coriobacteriia|o__Coriobacteriales|f__Eggerthellaceae|g__Slackia|s__Slackia_unclassified	0	0	0	0	0	0	0	0	0	0	0	0	0	0	0	0	0	0	0.01375	0.22949	0.06413	0.01513	0	0	0	0	0	0	0	0	0	0	0	0	0	0	0	0	0	0	0	0	0	0	0	0.01091	0.03325	0.06074	0.03671
d__Bacteria|p__Actinobacteriota|c__Coriobacteriia|o__Eggerthellales	0	0	0	0	0	0	0	0	0	0	0.02695	0.01732	0.01218	0	0	0	0	0	0	0	0	0	0	0	0	0	0	0	0	0	0	0	0	0	0	0	0	0	0	0	0	0	0	0	0	0	0	0	0
d__Bacteria|p__Actinobacteriota|c__Coriobacteriia|o__Eggerthellales|f__Eggerthellaceae	0	0	0	0	0	0	0	0	0	0	0.02695	0.01732	0.01218	0	0	0	0	0	0	0	0	0	0	0	0	0	0	0	0	0	0	0	0	0	0	0	0	0	0	0	0	0	0	0	0	0	0	0	0
d__Bacteria|p__Actinobacteriota|c__Coriobacteriia|o__Eggerthellales|f__Eggerthellaceae|g__Adlercreutzia	0	0	0	0	0	0	0	0	0	0	0.02695	0.01732	0.01218	0	0	0	0	0	0	0	0	0	0	0	0	0	0	0	0	0	0	0	0	0	0	0	0	0	0	0	0	0	0	0	0	0	0	0	0
d__Bacteria|p__Actinobacteriota|c__Coriobacteriia|o__Eggerthellales|f__Eggerthellaceae|g__Adlercreutzia|s__Adlercreutzia_equolifaciens	0	0	0	0	0	0	0	0	0	0	0.02695	0.01732	0.01218	0	0	0	0	0	0	0	0	0	0	0	0	0	0	0	0	0	0	0	0	0	0	0	0	0	0	0	0	0	0	0	0	0	0	0	0
d__Bacteria|p__Actinobacteriota|c__MB-A2-108	0	0	0	0	0	0	0	0	0	0	0	0	0	0	0	0	0	0	0	0	0	0	0	0	0	0	0	0	0	0	0	0	0	0	0	0	0	0	0	0	0	0	0.02858	0	0	0	0	0	0
d__Bacteria|p__Actinobacteriota|c__MB-A2-108|o__MB-A2-108_unclassified	0	0	0	0	0	0	0	0	0	0	0	0	0	0	0	0	0	0	0	0	0	0	0	0	0	0	0	0	0	0	0	0	0	0	0	0	0	0	0	0	0	0	0.02858	0	0	0	0	0	0
d__Bacteria|p__Actinobacteriota|c__MB-A2-108|o__MB-A2-108_unclassified|f__MB-A2-108_unclassified	0	0	0	0	0	0	0	0	0	0	0	0	0	0	0	0	0	0	0	0	0	0	0	0	0	0	0	0	0	0	0	0	0	0	0	0	0	0	0	0	0	0	0.02858	0	0	0	0	0	0
d__Bacteria|p__Actinobacteriota|c__MB-A2-108|o__MB-A2-108_unclassified|f__MB-A2-108_unclassified|g__MB-A2-108_unclassified	0	0	0	0	0	0	0	0	0	0	0	0	0	0	0	0	0	0	0	0	0	0	0	0	0	0	0	0	0	0	0	0	0	0	0	0	0	0	0	0	0	0	0.02858	0	0	0	0	0	0
d__Bacteria|p__Actinobacteriota|c__MB-A2-108|o__MB-A2-108_unclassified|f__MB-A2-108_unclassified|g__MB-A2-108_unclassified|s__MB-A2-108_unclassified	0	0	0	0	0	0	0	0	0	0	0	0	0	0	0	0	0	0	0	0	0	0	0	0	0	0	0	0	0	0	0	0	0	0	0	0	0	0	0	0	0	0	0.02858	0	0	0	0	0	0
d__Bacteria|p__Actinobacteriota|c__Nitriliruptoria	0	0	0	0.66528	0	0	0	0	0	0	0	0	0	0	0	0	0	0	0	0	0	0	0	0	0	0	0	0	0	0	0	0	0	0	0	0	0	0	0	0	0	0	0	0	0	0	0	0	0
d__Bacteria|p__Actinobacteriota|c__Nitriliruptoria|o__Egicoccales	0	0	0	0.66528	0	0	0	0	0	0	0	0	0	0	0	0	0	0	0	0	0	0	0	0	0	0	0	0	0	0	0	0	0	0	0	0	0	0	0	0	0	0	0	0	0	0	0	0	0
d__Bacteria|p__Actinobacteriota|c__Nitriliruptoria|o__Egicoccales|f__Egicoccaceae	0	0	0	0.66528	0	0	0	0	0	0	0	0	0	0	0	0	0	0	0	0	0	0	0	0	0	0	0	0	0	0	0	0	0	0	0	0	0	0	0	0	0	0	0	0	0	0	0	0	0
d__Bacteria|p__Actinobacteriota|c__Nitriliruptoria|o__Egicoccales|f__Egicoccaceae|g__Egicoccus	0	0	0	0.66528	0	0	0	0	0	0	0	0	0	0	0	0	0	0	0	0	0	0	0	0	0	0	0	0	0	0	0	0	0	0	0	0	0	0	0	0	0	0	0	0	0	0	0	0	0
d__Bacteria|p__Actinobacteriota|c__Nitriliruptoria|o__Egicoccales|f__Egicoccaceae|g__Egicoccus|s__Egicoccus_halophilus	0	0	0	0.66528	0	0	0	0	0	0	0	0	0	0	0	0	0	0	0	0	0	0	0	0	0	0	0	0	0	0	0	0	0	0	0	0	0	0	0	0	0	0	0	0	0	0	0	0	0
d__Bacteria|p__Actinobacteriota|c__Rubrobacteria	0	0	0	0	0	0	0	0	0	0	0	0	0	0	0.03508	0	0	0	0.00687	0	0	0	0	0	0.00533	0	0	0	0	0	0	0	0	0	0	0	0	0	0	0	0	0	0	0	0	0	0	0	0
d__Bacteria|p__Actinobacteriota|c__Rubrobacteria|o__Rubrobacterales	0	0	0	0	0	0	0	0	0	0	0	0	0	0	0.03508	0	0	0	0.00687	0	0	0	0	0	0.00533	0	0	0	0	0	0	0	0	0	0	0	0	0	0	0	0	0	0	0	0	0	0	0	0
d__Bacteria|p__Actinobacteriota|c__Rubrobacteria|o__Rubrobacterales|f__Rubrobacteraceae	0	0	0	0	0	0	0	0	0	0	0	0	0	0	0	0	0	0	0	0	0	0	0	0	0.00533	0	0	0	0	0	0	0	0	0	0	0	0	0	0	0	0	0	0	0	0	0	0	0	0
d__Bacteria|p__Actinobacteriota|c__Rubrobacteria|o__Rubrobacterales|f__Rubrobacteraceae|g__Rubrobacteraceae_unclassified	0	0	0	0	0	0	0	0	0	0	0	0	0	0	0	0	0	0	0	0	0	0	0	0	0.00533	0	0	0	0	0	0	0	0	0	0	0	0	0	0	0	0	0	0	0	0	0	0	0	0
d__Bacteria|p__Actinobacteriota|c__Rubrobacteria|o__Rubrobacterales|f__Rubrobacteraceae|g__Rubrobacteraceae_unclassified|s__Rubrobacteraceae_unclassified	0	0	0	0	0	0	0	0	0	0	0	0	0	0	0	0	0	0	0	0	0	0	0	0	0.00533	0	0	0	0	0	0	0	0	0	0	0	0	0	0	0	0	0	0	0	0	0	0	0	0
d__Bacteria|p__Actinobacteriota|c__Rubrobacteria|o__Rubrobacterales|f__Rubrobacteriaceae	0	0	0	0	0	0	0	0	0	0	0	0	0	0	0.03508	0	0	0	0.00687	0	0	0	0	0	0	0	0	0	0	0	0	0	0	0	0	0	0	0	0	0	0	0	0	0	0	0	0	0	0
d__Bacteria|p__Actinobacteriota|c__Rubrobacteria|o__Rubrobacterales|f__Rubrobacteriaceae|g__Rubrobacter	0	0	0	0	0	0	0	0	0	0	0	0	0	0	0.03508	0	0	0	0.00687	0	0	0	0	0	0	0	0	0	0	0	0	0	0	0	0	0	0	0	0	0	0	0	0	0	0	0	0	0	0
d__Bacteria|p__Actinobacteriota|c__Rubrobacteria|o__Rubrobacterales|f__Rubrobacteriaceae|g__Rubrobacter|s__Rubrobacter_unclassified	0	0	0	0	0	0	0	0	0	0	0	0	0	0	0.03508	0	0	0	0.00687	0	0	0	0	0	0	0	0	0	0	0	0	0	0	0	0	0	0	0	0	0	0	0	0	0	0	0	0	0	0
d__Bacteria|p__Actinobacteriota|c__Thermoleophilia	0.05726	0.31933	0	0	0.00354	0	0	0	0	0	0	0	0	0	0	0	0.06022	0	0	0	0	0	0	0.05302	0	0	0	0	0	0	0	0	0	0.02958	0	0	0	0	0	0.02471	0	0	0.0454	0	0	0	0	0.59913	0
d__Bacteria|p__Actinobacteriota|c__Thermoleophilia|o__Gaiellales	0.05726	0	0	0	0	0	0	0	0	0	0	0	0	0	0	0	0	0	0	0	0	0	0	0.05302	0	0	0	0	0	0	0	0	0	0.01613	0	0	0	0	0	0.00872	0	0	0.0454	0	0	0	0	0	0
d__Bacteria|p__Actinobacteriota|c__Thermoleophilia|o__Gaiellales|f__Gaiellaceae	0.05726	0	0	0	0	0	0	0	0	0	0	0	0	0	0	0	0	0	0	0	0	0	0	0.05302	0	0	0	0	0	0	0	0	0	0.01613	0	0	0	0	0	0	0	0	0.02522	0	0	0	0	0	0
d__Bacteria|p__Actinobacteriota|c__Thermoleophilia|o__Gaiellales|f__Gaiellaceae|g__Gaiella	0.05726	0	0	0	0	0	0	0	0	0	0	0	0	0	0	0	0	0	0	0	0	0	0	0.05302	0	0	0	0	0	0	0	0	0	0.01613	0	0	0	0	0	0	0	0	0.02522	0	0	0	0	0	0
d__Bacteria|p__Actinobacteriota|c__Thermoleophilia|o__Gaiellales|f__Gaiellaceae|g__Gaiella|s__Gaiella_unclassified	0.05726	0	0	0	0	0	0	0	0	0	0	0	0	0	0	0	0	0	0	0	0	0	0	0.05302	0	0	0	0	0	0	0	0	0	0.01613	0	0	0	0	0	0	0	0	0.02522	0	0	0	0	0	0
d__Bacteria|p__Actinobacteriota|c__Thermoleophilia|o__Gaiellales|f__Gaiellales_unclassified	0	0	0	0	0	0	0	0	0	0	0	0	0	0	0	0	0	0	0	0	0	0	0	0	0	0	0	0	0	0	0	0	0	0	0	0	0	0	0	0.00872	0	0	0.02018	0	0	0	0	0	0
d__Bacteria|p__Actinobacteriota|c__Thermoleophilia|o__Gaiellales|f__Gaiellales_unclassified|g__Gaiellales_unclassified	0	0	0	0	0	0	0	0	0	0	0	0	0	0	0	0	0	0	0	0	0	0	0	0	0	0	0	0	0	0	0	0	0	0	0	0	0	0	0	0.00872	0	0	0.02018	0	0	0	0	0	0
d__Bacteria|p__Actinobacteriota|c__Thermoleophilia|o__Gaiellales|f__Gaiellales_unclassified|g__Gaiellales_unclassified|s__Gaiellales_unclassified	0	0	0	0	0	0	0	0	0	0	0	0	0	0	0	0	0	0	0	0	0	0	0	0	0	0	0	0	0	0	0	0	0	0	0	0	0	0	0	0.00872	0	0	0.02018	0	0	0	0	0	0
d__Bacteria|p__Actinobacteriota|c__Thermoleophilia|o__Solirubrobacterales	0	0.31933	0	0	0.00354	0	0	0	0	0	0	0	0	0	0	0	0.06022	0	0	0	0	0	0	0	0	0	0	0	0	0	0	0	0	0.01345	0	0	0	0	0	0.01599	0	0	0	0	0	0	0	0.59913	0
d__Bacteria|p__Actinobacteriota|c__Thermoleophilia|o__Solirubrobacterales|f__67-14	0	0.31933	0	0	0.00354	0	0	0	0	0	0	0	0	0	0	0	0.06022	0	0	0	0	0	0	0	0	0	0	0	0	0	0	0	0	0.01345	0	0	0	0	0	0.01599	0	0	0	0	0	0	0	0.49145	0
d__Bacteria|p__Actinobacteriota|c__Thermoleophilia|o__Solirubrobacterales|f__67-14|g__67-14_unclassified	0	0.31933	0	0	0.00354	0	0	0	0	0	0	0	0	0	0	0	0.06022	0	0	0	0	0	0	0	0	0	0	0	0	0	0	0	0	0.01345	0	0	0	0	0	0.01599	0	0	0	0	0	0	0	0.49145	0
d__Bacteria|p__Actinobacteriota|c__Thermoleophilia|o__Solirubrobacterales|f__67-14|g__67-14_unclassified|s__67-14_unclassified	0	0.31933	0	0	0.00354	0	0	0	0	0	0	0	0	0	0	0	0.06022	0	0	0	0	0	0	0	0	0	0	0	0	0	0	0	0	0.01345	0	0	0	0	0	0.01599	0	0	0	0	0	0	0	0.49145	0
d__Bacteria|p__Actinobacteriota|c__Thermoleophilia|o__Solirubrobacterales|f__Solirubrobacteraceae	0	0	0	0	0	0	0	0	0	0	0	0	0	0	0	0	0	0	0	0	0	0	0	0	0	0	0	0	0	0	0	0	0	0	0	0	0	0	0	0	0	0	0	0	0	0	0	0.10768	0
d__Bacteria|p__Actinobacteriota|c__Thermoleophilia|o__Solirubrobacterales|f__Solirubrobacteraceae|g__Conexibacter	0	0	0	0	0	0	0	0	0	0	0	0	0	0	0	0	0	0	0	0	0	0	0	0	0	0	0	0	0	0	0	0	0	0	0	0	0	0	0	0	0	0	0	0	0	0	0	0	0
d__Bacteria|p__Actinobacteriota|c__Thermoleophilia|o__Solirubrobacterales|f__Solirubrobacteraceae|g__Conexibacter|s__Conexibacter_unclassified	0	0	0	0	0	0	0	0	0	0	0	0	0	0	0	0	0	0	0	0	0	0	0	0	0	0	0	0	0	0	0	0	0	0	0	0	0	0	0	0	0	0	0	0	0	0	0	0	0
d__Bacteria|p__Actinobacteriota|c__Thermoleophilia|o__Solirubrobacterales|f__Solirubrobacteraceae|g__Parviterribacter	0	0	0	0	0	0	0	0	0	0	0	0	0	0	0	0	0	0	0	0	0	0	0	0	0	0	0	0	0	0	0	0	0	0	0	0	0	0	0	0	0	0	0	0	0	0	0	0	0
d__Bacteria|p__Actinobacteriota|c__Thermoleophilia|o__Solirubrobacterales|f__Solirubrobacteraceae|g__Parviterribacter|s__Parviterribacter_unclassified	0	0	0	0	0	0	0	0	0	0	0	0	0	0	0	0	0	0	0	0	0	0	0	0	0	0	0	0	0	0	0	0	0	0	0	0	0	0	0	0	0	0	0	0	0	0	0	0	0
d__Bacteria|p__Actinobacteriota|c__Thermoleophilia|o__Solirubrobacterales|f__Solirubrobacteraceae|g__Patulibacter	0	0	0	0	0	0	0	0	0	0	0	0	0	0	0	0	0	0	0	0	0	0	0	0	0	0	0	0	0	0	0	0	0	0	0	0	0	0	0	0	0	0	0	0	0	0	0	0	0
d__Bacteria|p__Actinobacteriota|c__Thermoleophilia|o__Solirubrobacterales|f__Solirubrobacteraceae|g__Patulibacter|s__Patulibacter_unclassified	0	0	0	0	0	0	0	0	0	0	0	0	0	0	0	0	0	0	0	0	0	0	0	0	0	0	0	0	0	0	0	0	0	0	0	0	0	0	0	0	0	0	0	0	0	0	0	0	0
d__Bacteria|p__Actinobacteriota|c__Thermoleophilia|o__Solirubrobacterales|f__Solirubrobacteraceae|g__Solirubrobacter	0	0	0	0	0	0	0	0	0	0	0	0	0	0	0	0	0	0	0	0	0	0	0	0	0	0	0	0	0	0	0	0	0	0	0	0	0	0	0	0	0	0	0	0	0	0	0	0.10768	0
d__Bacteria|p__Actinobacteriota|c__Thermoleophilia|o__Solirubrobacterales|f__Solirubrobacteraceae|g__Solirubrobacter|s__Solirubrobacter_phytolaccae	0	0	0	0	0	0	0	0	0	0	0	0	0	0	0	0	0	0	0	0	0	0	0	0	0	0	0	0	0	0	0	0	0	0	0	0	0	0	0	0	0	0	0	0	0	0	0	0	0
d__Bacteria|p__Actinobacteriota|c__Thermoleophilia|o__Solirubrobacterales|f__Solirubrobacteraceae|g__Solirubrobacter|s__Solirubrobacter_unclassified	0	0	0	0	0	0	0	0	0	0	0	0	0	0	0	0	0	0	0	0	0	0	0	0	0	0	0	0	0	0	0	0	0	0	0	0	0	0	0	0	0	0	0	0	0	0	0	0.10768	0
d__Bacteria|p__Armatimonadota	0	0	0	0	0	0	0	0	0	0	0	0	0	0	0	0	0	0	0	0	0	0	0	0	0	0	0	0	0	0	0	0	0	0.00403	0	0	0	0	0	0	0	0	0	0	0	0	0	0	0
d__Bacteria|p__Armatimonadota|c__Armatimonadota_unclassified	0	0	0	0	0	0	0	0	0	0	0	0	0	0	0	0	0	0	0	0	0	0	0	0	0	0	0	0	0	0	0	0	0	0	0	0	0	0	0	0	0	0	0	0	0	0	0	0	0
d__Bacteria|p__Armatimonadota|c__Armatimonadota_unclassified|o__Armatimonadota_unclassified	0	0	0	0	0	0	0	0	0	0	0	0	0	0	0	0	0	0	0	0	0	0	0	0	0	0	0	0	0	0	0	0	0	0	0	0	0	0	0	0	0	0	0	0	0	0	0	0	0
d__Bacteria|p__Armatimonadota|c__Armatimonadota_unclassified|o__Armatimonadota_unclassified|f__Armatimonadota_unclassified	0	0	0	0	0	0	0	0	0	0	0	0	0	0	0	0	0	0	0	0	0	0	0	0	0	0	0	0	0	0	0	0	0	0	0	0	0	0	0	0	0	0	0	0	0	0	0	0	0
d__Bacteria|p__Armatimonadota|c__Armatimonadota_unclassified|o__Armatimonadota_unclassified|f__Armatimonadota_unclassified|g__Armatimonadota_unclassified	0	0	0	0	0	0	0	0	0	0	0	0	0	0	0	0	0	0	0	0	0	0	0	0	0	0	0	0	0	0	0	0	0	0	0	0	0	0	0	0	0	0	0	0	0	0	0	0	0
d__Bacteria|p__Armatimonadota|c__Armatimonadota_unclassified|o__Armatimonadota_unclassified|f__Armatimonadota_unclassified|g__Armatimonadota_unclassified|s__Armatimonadota_unclassified	0	0	0	0	0	0	0	0	0	0	0	0	0	0	0	0	0	0	0	0	0	0	0	0	0	0	0	0	0	0	0	0	0	0	0	0	0	0	0	0	0	0	0	0	0	0	0	0	0
d__Bacteria|p__Armatimonadota|c__Fimbriimonadia	0	0	0	0	0	0	0	0	0	0	0	0	0	0	0	0	0	0	0	0	0	0	0	0	0	0	0	0	0	0	0	0	0	0.00403	0	0	0	0	0	0	0	0	0	0	0	0	0	0	0
d__Bacteria|p__Armatimonadota|c__Fimbriimonadia|o__Fimbriimonadales	0	0	0	0	0	0	0	0	0	0	0	0	0	0	0	0	0	0	0	0	0	0	0	0	0	0	0	0	0	0	0	0	0	0.00403	0	0	0	0	0	0	0	0	0	0	0	0	0	0	0
d__Bacteria|p__Armatimonadota|c__Fimbriimonadia|o__Fimbriimonadales|f__Fimbriimonadaceae	0	0	0	0	0	0	0	0	0	0	0	0	0	0	0	0	0	0	0	0	0	0	0	0	0	0	0	0	0	0	0	0	0	0.00403	0	0	0	0	0	0	0	0	0	0	0	0	0	0	0
d__Bacteria|p__Armatimonadota|c__Fimbriimonadia|o__Fimbriimonadales|f__Fimbriimonadaceae|g__Fimbriimonas	0	0	0	0	0	0	0	0	0	0	0	0	0	0	0	0	0	0	0	0	0	0	0	0	0	0	0	0	0	0	0	0	0	0.00403	0	0	0	0	0	0	0	0	0	0	0	0	0	0	0
d__Bacteria|p__Armatimonadota|c__Fimbriimonadia|o__Fimbriimonadales|f__Fimbriimonadaceae|g__Fimbriimonas|s__uncultured_Fimbriimonas_sp.	0	0	0	0	0	0	0	0	0	0	0	0	0	0	0	0	0	0	0	0	0	0	0	0	0	0	0	0	0	0	0	0	0	0.00403	0	0	0	0	0	0	0	0	0	0	0	0	0	0	0
d__Bacteria|p__Bacteroidota	1.76688	4.45642	21.7564	21.6825	28.2745	31.8858	1.5308	1.534	31.8298	27.7898	30.4088	28.3925	34.5673	27.1313	14.5333	18.0577	30.5326	38.8164	23.1361	27.7766	14.0781	17.1498	4.93655	1.65965	4.66761	6.21161	4.30628	7.20349	23.0844	14.875	14.2704	8.51365	9.79712	2.37182	5.41659	6.20923	51.8084	43.3177	2.46079	0.2805	1.13955	5.64293	0.29256	0.10466	3.6209	3.20936	7.77337	6.1349	7.88472
d__Bacteria|p__Bacteroidota|c__Bacteroidia	1.76688	4.45642	21.7564	21.6825	28.2479	31.8858	1.5308	1.534	31.8298	27.7641	30.2587	28.2963	34.5064	26.9779	14.5333	18.0577	30.5254	38.8076	23.1224	27.6709	14.0039	17.1229	4.87342	1.63049	4.65339	6.21161	4.30628	7.19461	23.0844	14.8706	12.7024	8.51365	9.79712	2.37182	5.41659	6.20923	51.7352	43.313	2.46079	0.2805	1.13955	5.60559	0.27238	0.10063	3.60565	3.18754	7.77337	5.97753	7.88472
d__Bacteria|p__Bacteroidota|c__Bacteroidia|o__Bacteroidales	1.64418	4.1442	21.7564	21.6825	28.2479	31.8858	1.52427	1.534	31.8298	27.7641	30.2587	28.2963	34.5064	26.9421	14.3452	17.8629	30.4724	38.8076	23.1224	27.6709	13.9533	17.1229	4.79767	1.52709	4.6054	6.14114	3.78366	7.17685	23.056	14.7516	12.6729	8.50945	9.74126	2.36106	5.35457	6.18945	51.7319	43.3067	2.20668	0.19475	0.68818	5.52158	0.17485	0.0416	3.60565	3.18754	7.77337	5.35079	7.88472
d__Bacteria|p__Bacteroidota|c__Bacteroidia|o__Bacteroidales|f__Bacteroidaceae	0.42536	2.4411	14.3311	14.486	25.6432	29.9051	1.46716	1.48865	25.5772	22.3295	19.4121	18.5595	24.4155	17.652	7.52021	9.56418	26.7386	34.4583	20.6601	24.2484	12.5762	16.1145	3.34574	0.95973	4.15749	1.07722	0.70692	5.13444	17.9154	12.8285	4.4491	3.50916	9.15868	2.13518	3.42218	3.84617	44.5095	35.6098	0.04927	0.07558	0.39285	2.14703	0.01009	0.00403	3.35294	3.0909	7.45253	5.11058	7.64443
d__Bacteria|p__Bacteroidota|c__Bacteroidia|o__Bacteroidales|f__Bacteroidaceae|g__Bacteroidaceae_unclassified	0	0	0	0	0	0	0	0	0	0	0	0	0	0	0	0	0	0	0	0	0	0	0	0	0.02133	0	0	0.05328	0	0	0	0	0	0	0	0	0	0	0	0	0	0	0	0	0	0	0	0	0
d__Bacteria|p__Bacteroidota|c__Bacteroidia|o__Bacteroidales|f__Bacteroidaceae|g__Bacteroidaceae_unclassified|s__Bacteroidaceae_unclassified	0	0	0	0	0	0	0	0	0	0	0	0	0	0	0	0	0	0	0	0	0	0	0	0	0.02133	0	0	0.05328	0	0	0	0	0	0	0	0	0	0	0	0	0	0	0	0	0	0	0	0	0
d__Bacteria|p__Bacteroidota|c__Bacteroidia|o__Bacteroidales|f__Bacteroidaceae|g__Bacteroides	0.42536	2.4411	14.3311	14.486	25.6432	29.9051	1.46716	1.48865	25.5772	22.3295	19.4121	18.5595	24.4155	17.652	7.52021	9.56418	26.7386	34.4583	20.6601	24.2484	12.5762	16.1145	3.34574	0.95973	4.13616	1.07722	0.70692	5.08116	17.9154	12.8285	4.4491	3.50916	9.15868	2.13518	3.42218	3.84617	44.5095	35.6098	0.04927	0.07558	0.39285	2.14703	0.01009	0.00403	3.35294	3.0909	7.45253	5.11058	7.64443
d__Bacteria|p__Bacteroidota|c__Bacteroidia|o__Bacteroidales|f__Bacteroidaceae|g__Bacteroides|s__Bacteroides_acidifaciens	0.07362	0	0	0	0	0.01225	0	0	0	0	0	0	0	0	0	0	0	0	0	0	0	0	0.0505	0	0	0	0	0	0	0.0029	0.01554	0	0	0	0.00564	0	0	0	0.02074	0	0	0	0	0	0	0	0	0	0
d__Bacteria|p__Bacteroidota|c__Bacteroidia|o__Bacteroidales|f__Bacteroidaceae|g__Bacteroides|s__Bacteroides_caccae	0	0	0	0	0.11872	0.06123	0	0.02267	0	0	3.90938	3.2443	4.63346	3.06151	0.01595	0.07567	0	0	0	0	0	0.01008	0	0	0	0	0	0	0.48625	1.5007	0	0	0	0	0	0	0.56809	0.35854	0	0	0	0	0	0	0	0	0.01995	0	0.02336
d__Bacteria|p__Bacteroidota|c__Bacteroidia|o__Bacteroidales|f__Bacteroidaceae|g__Bacteroides|s__Bacteroides_clarus	0	0	0	0	0	0	0	0	0	0	0	0	0	0	0	0	0	0	0	0	0	0	0	0	0	0	0	0	0	0	0	0	0	0	0	0	0	0	0	0	0	0	0	0	0	0	0	0	0
d__Bacteria|p__Bacteroidota|c__Bacteroidia|o__Bacteroidales|f__Bacteroidaceae|g__Bacteroides|s__Bacteroides_coprocola	0	0	0	0	0	0	0	0	0	0	0	0	0	0	0	0	0	0	0	0	0	0	0	0	0	0	0	0	0	0	0	0	0	0	0	0	0	0	0	0	0	0	0	0	0	0	0	0	0.00834
d__Bacteria|p__Bacteroidota|c__Bacteroidia|o__Bacteroidales|f__Bacteroidaceae|g__Bacteroides|s__Bacteroides_coprophilus	0	0	0	0	0	0	0	0	0	0	0	0	0	0	0	0	0	0	0	0	0.00675	0	0	0	0	0	0	0	0	0	0	0	0	0	0	0	0	0	0	0	0	0	0	0	0	0	0	0	0
d__Bacteria|p__Bacteroidota|c__Bacteroidia|o__Bacteroidales|f__Bacteroidaceae|g__Bacteroides|s__Bacteroides_faecichinchillae	0	0	0	0	0	0	0	0	0	0	0	0	0	0	0	0	0	0	0	0.01816	0	0	0	0	0	0	0	0	0	0	0	0	0	0	0	0	0	0	0	0	0	0	0	0	0	0	0	0	0
d__Bacteria|p__Bacteroidota|c__Bacteroidia|o__Bacteroidales|f__Bacteroidaceae|g__Bacteroides|s__Bacteroides_finegoldii	0	0	0.11921	0	0.04075	0.04286	0	0	0	0	0.77572	1.04872	0.88082	0.42427	0	0	0	0	0	0.05613	0	0	0	0.06098	0	0	0	0	0	0	0	0	0.02235	0	0	0	0	0	0	0	0	0	0	0	0	0.06858	0.05818	0	0.06174
d__Bacteria|p__Bacteroidota|c__Bacteroidia|o__Bacteroidales|f__Bacteroidaceae|g__Bacteroides|s__Bacteroides_fragilis	0.26994	0.97928	0.21572	0.47929	0	0	0	0	0.04919	0.08443	0	0	0	0	0	0	0	0	12.648	11.8559	3.96422	6.96818	0.66284	0	0	0	0	0	0.01892	0	0	0	0.93374	0.27698	0.14236	0.18786	3.07973	2.15281	0.01297	0.02907	0	0	0	0	0	0	0	0	0
d__Bacteria|p__Bacteroidota|c__Bacteroidia|o__Bacteroidales|f__Bacteroidaceae|g__Bacteroides|s__Bacteroides_intestinalis	0	0	0	0	0	0	0	0	0	0	0	0	0	0	0	0	0	0	0	0	0	0	0	0	0	0	0	0	0	0	0.7568	0	0	0	0	0	0	0	0	0	0	0	0	0	0	0	0	0	0
d__Bacteria|p__Bacteroidota|c__Bacteroidia|o__Bacteroidales|f__Bacteroidaceae|g__Bacteroides|s__Bacteroides_massiliensis	0	0	0	0	1.4831	2.30981	0	0	0	0	0	0	0	0	0	0	0.11081	0.25016	1.02579	1.95149	1.20834	1.13951	0	0.19619	0	0	0.00864	0	0.03216	0.09289	0	0	0	0	0	0	0.00326	0	0	0	0	0	0	0	0.74292	0.64998	2.01649	1.81949	2.08424
d__Bacteria|p__Bacteroidota|c__Bacteroidia|o__Bacteroidales|f__Bacteroidaceae|g__Bacteroides|s__Bacteroides_nordii	0	0	0	0	0	0	0	0	0	0	0	0	0	0	0	0	0	0.04608	0	0	0	0	0	0	0	0	0	0	0	0	0	0	0	0	0	0	0	0	0	0	0	0	0	0	0	0	0	0	0
d__Bacteria|p__Bacteroidota|c__Bacteroidia|o__Bacteroidales|f__Bacteroidaceae|g__Bacteroides|s__Bacteroides_ovatus	0	0	0	0	0	0.04745	0.02938	0.04081	1.78453	1.21687	0	0	0	0	0	0	1.3273	1.12572	0	0	0	0	0	0	0	0	0	0	1.59118	0.63279	0	0.11772	0.90023	0.21244	0.48345	1.20131	0.03418	0.01566	0	0.01163	0	0	0	0	0	0	0.01662	0	0.01669
d__Bacteria|p__Bacteroidota|c__Bacteroidia|o__Bacteroidales|f__Bacteroidaceae|g__Bacteroides|s__Bacteroides_salyersiae	0	0	0	0	0	0	0.06528	0.06499	0	0	0	0	0	0	0	0	0.30593	0.4696	0	0	0	0	0	0.11135	0	0	0	0	0	0	0	0	0.29369	0.04437	0	0	0	0	0	0	0	0	0	0	0	0	0	0	0
d__Bacteria|p__Bacteroidota|c__Bacteroidia|o__Bacteroidales|f__Bacteroidaceae|g__Bacteroides|s__Bacteroides_sartorii	0	0	0.05961	0	0	0	0	0	0	0	0	0	0	0	0	0	0	0	0	0	0	0	0	0	0	0	0	0	0	0	0	0	0	0	0	0	0	0	0	0	0	0	0	0	0	0	0	0	0
d__Bacteria|p__Bacteroidota|c__Bacteroidia|o__Bacteroidales|f__Bacteroidaceae|g__Bacteroides|s__Bacteroides_sp.	0	0	0	0	0	0	0	0	0	0	0	0	0	0.00996	0	0	0	0	0	0.06604	0	0	0	0	0	0	0	0	0	0	0	0	0	0	0	0	0	0	0	0	0	0	0	0	0	0	0	0.02485	0
d__Bacteria|p__Bacteroidota|c__Bacteroidia|o__Bacteroidales|f__Bacteroidaceae|g__Bacteroides|s__Bacteroides_sp._1AL	0	0	0	0	0	0	0	0	0	0	0	0	0	0	0	0	0	0	0	0	0	0	0	0	0	0	0	0	0	0	0	0	0	0	0	0	0	0	0	0	0	0	0	0	0	0	0	0	0
d__Bacteria|p__Bacteroidota|c__Bacteroidia|o__Bacteroidales|f__Bacteroidaceae|g__Bacteroides|s__Bacteroides_sp._2011_Ileo_VSA_D7	0	0	0	0	0	0	0	0	0	0	0	0	0	0	0	0	0	0	0	0	0	0	0	0	0	0	0	0	0	0	0	0	0	0	0	0	0	0	0	0	0	0	0	0	0	0	0	0	0
d__Bacteria|p__Bacteroidota|c__Bacteroidia|o__Bacteroidales|f__Bacteroidaceae|g__Bacteroides|s__Bacteroides_sp._35BE34	0	0	0	0	0	0	0	0	0	0	0	0	0	0	0	0	0	0	0	0	0	0	0	0	0	0.02013	0	0	0	0	0	0	0	0	0	0	0	0	0	0	0	0	0	0	0	0	0	0	0
d__Bacteria|p__Bacteroidota|c__Bacteroidia|o__Bacteroidales|f__Bacteroidaceae|g__Bacteroides|s__Bacteroides_sp._HGA0250	0	0	0	0	0	0	0	0	0	0	0	0	0	0	0	0	0	0	0	0	0	0	0	0	0	0	0	0	0	0	0	0	0.31125	0.06992	0.64412	0.17303	0	0	0	0	0	0	0	0	0	0	0	0	0
d__Bacteria|p__Bacteroidota|c__Bacteroidia|o__Bacteroidales|f__Bacteroidaceae|g__Bacteroides|s__Bacteroides_sp._HGA0251	0	0	0	0	0	0	0	0	0	0.06607	0.49276	0.50223	0.50333	0.48203	0	0	0	0	0	0	0	0	0	0	0	0.04027	0	0	0.06811	0	0	0	0.37509	0.05647	0	0	0	0	0	0	0	0	0	0	0	0	0	0	0
d__Bacteria|p__Bacteroidota|c__Bacteroidia|o__Bacteroidales|f__Bacteroidaceae|g__Bacteroides|s__Bacteroides_sp._JJM0207-12	0	0	0	0	0	0	0	0	0	0	0	0	0	0	0.07973	0.1135	0	0	0	0	0	0	0	0	0	0	0	0	0	0	0	0	0	0	0	0	0	0	0	0	0	0	0	0	0	0	0	0	0
d__Bacteria|p__Bacteroidota|c__Bacteroidia|o__Bacteroidales|f__Bacteroidaceae|g__Bacteroides|s__Bacteroides_sp._S11	0	0	0	0	0	0	0	0	0	0	0	0	0	0	0	0	0	0	0	0	0	0	0	0	0	0	0	0	0.04541	0	0	0	0	0.01613	0	0	0	0	0	0	0	0	0	0	0	0	0	0	0
d__Bacteria|p__Bacteroidota|c__Bacteroidia|o__Bacteroidales|f__Bacteroidaceae|g__Bacteroides|s__Bacteroides_sp._S236	0	0	0	0	0	0	0	0	0	0	0	0	0	0	0	0	0	0	0	0	0	0	0	0	0	0	0	0	0	0	0	0	0	0	0	0	1.49103	0.79067	0	0	0	0	0	0	0	0	0	0	0
d__Bacteria|p__Bacteroidota|c__Bacteroidia|o__Bacteroidales|f__Bacteroidaceae|g__Bacteroides|s__Bacteroides_sp._S254	0	0	0	0	0	0	0	0	0.07125	0.08626	0.02502	0	0	0.00996	0	0	0	0	0	0	0	0	0	0	0	0	0	0	0	0	0	0	0	0	0	0	0	0	0	0	0	0	0	0	0	0	0	0	0
d__Bacteria|p__Bacteroidota|c__Bacteroidia|o__Bacteroidales|f__Bacteroidaceae|g__Bacteroides|s__Bacteroides_sp._TP-5	0	0	0	0	0	0	0	0	0	0	0	0	0	0	0	0	0	0	0	0	0	0	0	0	0	0	0	0	0	0.0029	0	0	0	0	0	0	0	0	0	0	0	0	0	0	0.01961	0	0	0	0
d__Bacteria|p__Bacteroidota|c__Bacteroidia|o__Bacteroidales|f__Bacteroidaceae|g__Bacteroides|s__Bacteroides_sp._W20	0	0	0	0	0	0	0	0	0	0	0	0	0	0	0	0	0	0	0	0	0	0	0	0	0	0	0	0	0	0	0	0	0	0	0	0	0	0	0	0	0	0	0	0	0	0	0	0	0
d__Bacteria|p__Bacteroidota|c__Bacteroidia|o__Bacteroidales|f__Bacteroidaceae|g__Bacteroides|s__Bacteroides_sp._WH2	0	0	0.02271	0	0	0	0	0	0.06107	0	0.13474	0.09236	0.11365	0.11553	0	0	0.11081	0.03292	0	0	0	0	0	0	0	0	0	0	2.43501	2.67921	0	0.16957	0	0.00538	0	0	0	0	0	0	0	0	0	0	0	0	0	0	0
d__Bacteria|p__Bacteroidota|c__Bacteroidia|o__Bacteroidales|f__Bacteroidaceae|g__Bacteroides|s__Bacteroides_sp._dnLKV9	0	0	0	0	0	0	0	0	2.40539	2.1309	0.33492	0.24631	0.35314	0.23106	0.02232	0.01892	0.09154	0.03292	0	0.04128	0	0	0	0	0	0	0	0	0	0	0	0	0	0	0	0	0.02116	0.01096	0	0	0	0	0	0	0	0	0	0	0
d__Bacteria|p__Bacteroidota|c__Bacteroidia|o__Bacteroidales|f__Bacteroidaceae|g__Bacteroides|s__Bacteroides_stercoris	0	0	0	0	0	0	0	0	0	0	0	0.03656	0	0	0	0	0.24089	0	0	0.03467	0	0	0	0	0	0	0	0	0	0	0	0	0	0	0	0	0	0	0	0	0	0	0	0	0	0	0	0	0
d__Bacteria|p__Bacteroidota|c__Bacteroidia|o__Bacteroidales|f__Bacteroidaceae|g__Bacteroides|s__Bacteroides_thetaiotaomicron	0	0	0.42292	0.08584	0.38273	0.55258	0	0	3.68272	3.06512	0.74877	0.40987	0.62713	0.67325	0.12119	0.23646	0.10358	0.11191	0.93472	0.83706	0.59404	0.70421	0	0	0.32528	0.92621	0.02736	0.8738	10.2887	5.86639	0.59207	0.40641	0.98482	0.50422	0.10007	0	0.14975	0.14717	0	0.01453	0	0.03267	0	0	0.061	0	0.0133	0.08007	0.01335
d__Bacteria|p__Bacteroidota|c__Bacteroidia|o__Bacteroidales|f__Bacteroidaceae|g__Bacteroides|s__Bacteroides_togonis	0	0	0	0	0	0	0	0	0	0	0	0	0	0	0	0	0	0	0	0	0	0	0	0	0	0	0	0	0	0	0.69153	0.80302	0	0	0	0	0	0	0	0	0	0	0	0	0	0	0	0	0
d__Bacteria|p__Bacteroidota|c__Bacteroidia|o__Bacteroidales|f__Bacteroidaceae|g__Bacteroides|s__Bacteroides_unclassified	0	0.19869	11.9213	12.0681	22.0055	24.6196	0.05875	0.05592	1.11618	0.95624	4.73706	5.2109	5.82075	4.32236	6.71015	8.39513	20.9669	28.6301	5.32999	7.65903	5.85773	6.31271	0.46714	0.39768	1.83079	0	0.31962	1.93052	0.69626	0.1045	1.29759	0.95157	1.19711	0.24471	1.73505	1.86623	38.757	31.5923	0.01556	0	0.01114	0.9895	0.01009	0.00403	2.52941	2.30376	5.0005	2.76926	4.91273
d__Bacteria|p__Bacteroidota|c__Bacteroidia|o__Bacteroidales|f__Bacteroidaceae|g__Bacteroides|s__Bacteroides_uniformis	0.0818	1.26313	0.44563	1.43072	0	0	0.97266	0.81006	14.3594	13.2608	7.52233	6.8446	8.03905	7.00542	0.09249	0.30834	1.50073	1.74892	0	0	0	0	1.85594	0.02651	0	0.09061	0	0	2.05661	1.76195	0.92929	0.13173	0.17877	0.07395	0.14799	0.11618	0.37113	0.49162	0	0	0.34828	0.82614	0	0	0	0	0.00997	0	0.23863
d__Bacteria|p__Bacteroidota|c__Bacteroidia|o__Bacteroidales|f__Bacteroidaceae|g__Bacteroides|s__Bacteroides_xylanisolvens	0	0	0.36048	0.04292	0	0.09949	0.15341	0.07859	1.12975	0.87916	0.02502	0.05003	0.07712	0	0.37314	0.41616	0.29147	0.38621	0.27492	0.53493	0.27846	0.44539	0	0.04772	0.28795	0	0.01728	0.04262	0	0	0	0	0.05906	0	0	0	0.03418	0.0501	0	0	0.03343	0	0	0	0	0	0	0	0
d__Bacteria|p__Bacteroidota|c__Bacteroidia|o__Bacteroidales|f__Bacteroidaceae|g__Bacteroides|s__uncultured_Bacteroides_sp.	0	0	0.76353	0.37914	1.61245	2.1598	0.18768	0.41561	0.91771	0.58366	0.70642	0.87361	3.36702	1.31663	0.10524	0	1.68863	1.62384	0.44674	1.19368	0.66661	0.53446	0.30932	0.1193	1.69214	0	0.33402	2.23422	0.19677	0.18432	0.16628	0.92914	3.90257	0.63061	0.1635	0.30156	0	0	0	0.02035	0	0.29872	0	0	0	0.06858	0.31752	0.41691	0.28535
d__Bacteria|p__Bacteroidota|c__Bacteroidia|o__Bacteroidales|f__Bacteroidales_Incertae_Sedis	0	0	0	0	0	0	0	0	0	0	0	0	0	0	0.0303	0	0	0	0	0	0	0	0	0	0	0	0	0	0	0	0	0	0	0	0	0	0	0	0	0	0	0	0	0	0	0	0	0	0
d__Bacteria|p__Bacteroidota|c__Bacteroidia|o__Bacteroidales|f__Bacteroidales_Incertae_Sedis|g__Phocaeicola	0	0	0	0	0	0	0	0	0	0	0	0	0	0	0.0303	0	0	0	0	0	0	0	0	0	0	0	0	0	0	0	0	0	0	0	0	0	0	0	0	0	0	0	0	0	0	0	0	0	0
d__Bacteria|p__Bacteroidota|c__Bacteroidia|o__Bacteroidales|f__Bacteroidales_Incertae_Sedis|g__Phocaeicola|s__Phocaeicola_unclassified	0	0	0	0	0	0	0	0	0	0	0	0	0	0	0.0303	0	0	0	0	0	0	0	0	0	0	0	0	0	0	0	0	0	0	0	0	0	0	0	0	0	0	0	0	0	0	0	0	0	0
d__Bacteria|p__Bacteroidota|c__Bacteroidia|o__Bacteroidales|f__Bacteroidales_RF16_group	0	0	0	0	0	0	0	0	0	0	0	0	0	0	0	0	0	0	0	0	0	0	0	0	0	0	0	0	0	0	0	0	0	0	0	0	0	0	0	0	0	0	0	0	0	0	0	0	0
d__Bacteria|p__Bacteroidota|c__Bacteroidia|o__Bacteroidales|f__Bacteroidales_RF16_group|g__Bacteroidales_RF16_group_unclassified	0	0	0	0	0	0	0	0	0	0	0	0	0	0	0	0	0	0	0	0	0	0	0	0	0	0	0	0	0	0	0	0	0	0	0	0	0	0	0	0	0	0	0	0	0	0	0	0	0
d__Bacteria|p__Bacteroidota|c__Bacteroidia|o__Bacteroidales|f__Bacteroidales_RF16_group|g__Bacteroidales_RF16_group_unclassified|s__Bacteroidales_RF16_group_unclassified	0	0	0	0	0	0	0	0	0	0	0	0	0	0	0	0	0	0	0	0	0	0	0	0	0	0	0	0	0	0	0	0	0	0	0	0	0	0	0	0	0	0	0	0	0	0	0	0	0
d__Bacteria|p__Bacteroidota|c__Bacteroidia|o__Bacteroidales|f__Bacteroidales_UCG-001	0	0	0	0	0	0	0	0	0	0	0	0	0	0	0	0	0	0	0	0	0	0	0	0	0	0	0	0	0	0	0	0	0	0	0	0	0	0	0	0	0	0	0.00504	0	0	0	0	0	0
d__Bacteria|p__Bacteroidota|c__Bacteroidia|o__Bacteroidales|f__Bacteroidales_UCG-001|g__Bacteroidales_UCG-001_unclassified	0	0	0	0	0	0	0	0	0	0	0	0	0	0	0	0	0	0	0	0	0	0	0	0	0	0	0	0	0	0	0	0	0	0	0	0	0	0	0	0	0	0	0.00504	0	0	0	0	0	0
d__Bacteria|p__Bacteroidota|c__Bacteroidia|o__Bacteroidales|f__Bacteroidales_UCG-001|g__Bacteroidales_UCG-001_unclassified|s__Bacteroidales_UCG-001_unclassified	0	0	0	0	0	0	0	0	0	0	0	0	0	0	0	0	0	0	0	0	0	0	0	0	0	0	0	0	0	0	0	0	0	0	0	0	0	0	0	0	0	0	0.00504	0	0	0	0	0	0
d__Bacteria|p__Bacteroidota|c__Bacteroidia|o__Bacteroidales|f__Bacteroidales_unclassified	0	0	0	0	0	0	0	0	0	0	0	0	0	0	0	0	0	0	0	0	0	0	0	0	0	0	0	0	0.00757	0	0	0	0	0	0	0.38313	0	0	0	0	0	0	0	0	0	0	0	0	0
d__Bacteria|p__Bacteroidota|c__Bacteroidia|o__Bacteroidales|f__Bacteroidales_unclassified|g__Bacteroidales_unclassified	0	0	0	0	0	0	0	0	0	0	0	0	0	0	0	0	0	0	0	0	0	0	0	0	0	0	0	0	0.00757	0	0	0	0	0	0	0.38313	0	0	0	0	0	0	0	0	0	0	0	0	0
d__Bacteria|p__Bacteroidota|c__Bacteroidia|o__Bacteroidales|f__Bacteroidales_unclassified|g__Bacteroidales_unclassified|s__Bacteroidales_unclassified	0	0	0	0	0	0	0	0	0	0	0	0	0	0	0	0	0	0	0	0	0	0	0	0	0	0	0	0	0.00757	0	0	0	0	0	0	0.38313	0	0	0	0	0	0	0	0	0	0	0	0	0
d__Bacteria|p__Bacteroidota|c__Bacteroidia|o__Bacteroidales|f__Bacteroidetes_vadinHA17	0	0	0	0	0	0	0	0	0	0	0	0	0	0	0	0	0	0	0	0	0	0	0	0	0	0	0	0	0	0	0	0	0	0	0	0	0	0	0	0.00727	0	0	0	0	0	0	0	0	0
d__Bacteria|p__Bacteroidota|c__Bacteroidia|o__Bacteroidales|f__Bacteroidetes_vadinHA17|g__Bacteroidetes_vadinHA17_unclassified	0	0	0	0	0	0	0	0	0	0	0	0	0	0	0	0	0	0	0	0	0	0	0	0	0	0	0	0	0	0	0	0	0	0	0	0	0	0	0	0.00727	0	0	0	0	0	0	0	0	0
d__Bacteria|p__Bacteroidota|c__Bacteroidia|o__Bacteroidales|f__Bacteroidetes_vadinHA17|g__Bacteroidetes_vadinHA17_unclassified|s__Bacteroidetes_vadinHA17_unclassified	0	0	0	0	0	0	0	0	0	0	0	0	0	0	0	0	0	0	0	0	0	0	0	0	0	0	0	0	0	0	0	0	0	0	0	0	0	0	0	0.00727	0	0	0	0	0	0	0	0	0
d__Bacteria|p__Bacteroidota|c__Bacteroidia|o__Bacteroidales|f__Barnesiellaceae	0	0	0.3179	0.63667	0.13821	0.20512	0	0	0	0	1.65345	1.63562	1.81848	1.41623	0	0	2.0596	2.02102	0	0	0	0	0	0	0.04799	0	0	0	0	0	0	0	0	0	0	0	0	0	0	0	0	0	0	0	0	0	0	0	0
d__Bacteria|p__Bacteroidota|c__Bacteroidia|o__Bacteroidales|f__Barnesiellaceae|g__Barnesiella	0	0	0.3179	0.63667	0.13821	0.20512	0	0	0	0	1.3243	1.39894	1.49375	1.12342	0	0	2.0596	2.02102	0	0	0	0	0	0	0.04799	0	0	0	0	0	0	0	0	0	0	0	0	0	0	0	0	0	0	0	0	0	0	0	0
d__Bacteria|p__Bacteroidota|c__Bacteroidia|o__Bacteroidales|f__Barnesiellaceae|g__Barnesiella|s__Barnesiella_sp._S496	0	0	0	0	0	0.05817	0	0	0	0	0	0	0	0	0	0	0	0	0	0	0	0	0	0	0	0	0	0	0	0	0	0	0	0	0	0	0	0	0	0	0	0	0	0	0	0	0	0	0
d__Bacteria|p__Bacteroidota|c__Bacteroidia|o__Bacteroidales|f__Barnesiellaceae|g__Barnesiella|s__Barnesiella_unclassified	0	0	0.3179	0.63667	0.07974	0.0796	0	0	0	0	1.3243	1.39894	1.49375	1.12342	0	0	1.7898	1.66992	0	0	0	0	0	0	0	0	0	0	0	0	0	0	0	0	0	0	0	0	0	0	0	0	0	0	0	0	0	0	0
d__Bacteria|p__Bacteroidota|c__Bacteroidia|o__Bacteroidales|f__Barnesiellaceae|g__Barnesiella|s__Barnesiella_viscericola	0	0	0	0	0	0	0	0	0	0	0	0	0	0	0	0	0	0	0	0	0	0	0	0	0.04799	0	0	0	0	0	0	0	0	0	0	0	0	0	0	0	0	0	0	0	0	0	0	0	0
d__Bacteria|p__Bacteroidota|c__Bacteroidia|o__Bacteroidales|f__Barnesiellaceae|g__Barnesiella|s__uncultured_Barnesiella_sp.	0	0	0	0	0.05847	0.06735	0	0	0	0	0	0	0	0	0	0	0.2698	0.3511	0	0	0	0	0	0	0	0	0	0	0	0	0	0	0	0	0	0	0	0	0	0	0	0	0	0	0	0	0	0	0
d__Bacteria|p__Bacteroidota|c__Bacteroidia|o__Bacteroidales|f__Barnesiellaceae|g__Coprobacter	0	0	0	0	0	0	0	0	0	0	0.32915	0.23668	0.32473	0.29281	0	0	0	0	0	0	0	0	0	0	0	0	0	0	0	0	0	0	0	0	0	0	0	0	0	0	0	0	0	0	0	0	0	0	0
d__Bacteria|p__Bacteroidota|c__Bacteroidia|o__Bacteroidales|f__Barnesiellaceae|g__Coprobacter|s__Coprobacter_fastidiosus	0	0	0	0	0	0	0	0	0	0	0.32915	0.23668	0.32473	0.29281	0	0	0	0	0	0	0	0	0	0	0	0	0	0	0	0	0	0	0	0	0	0	0	0	0	0	0	0	0	0	0	0	0	0	0
d__Bacteria|p__Bacteroidota|c__Bacteroidia|o__Bacteroidales|f__Dysgonamonadaceae	0	0	0	0	0	0	0	0	0	0	0	0	0	0	0.00319	0	0	0	0	0	0	0	0	0	0	0	0	0	0	0	0	0	0	0	0	0	0	0	0	0	0	0	0	0	0	0	0	0	0
d__Bacteria|p__Bacteroidota|c__Bacteroidia|o__Bacteroidales|f__Dysgonamonadaceae|g__Proteiniphilum	0	0	0	0	0	0	0	0	0	0	0	0	0	0	0.00319	0	0	0	0	0	0	0	0	0	0	0	0	0	0	0	0	0	0	0	0	0	0	0	0	0	0	0	0	0	0	0	0	0	0
d__Bacteria|p__Bacteroidota|c__Bacteroidia|o__Bacteroidales|f__Dysgonamonadaceae|g__Proteiniphilum|s__uncultured_Proteiniphilum_sp.	0	0	0	0	0	0	0	0	0	0	0	0	0	0	0.00319	0	0	0	0	0	0	0	0	0	0	0	0	0	0	0	0	0	0	0	0	0	0	0	0	0	0	0	0	0	0	0	0	0	0
d__Bacteria|p__Bacteroidota|c__Bacteroidia|o__Bacteroidales|f__Dysgonomonadaceae	0.06544	0	0	0	0	0	0	0	0	0	0	0	0	0.00398	4.31025	5.93599	0	0	0	0	0	0	0.01894	0	0	0	0	0	0	0	0	0	0	0	0	0	0	0	0	0	0	0	0	0	0	0	0	0	0
d__Bacteria|p__Bacteroidota|c__Bacteroidia|o__Bacteroidales|f__Dysgonomonadaceae|g__Dysgonomonas	0	0	0	0	0	0	0	0	0	0	0	0	0	0	0	0	0	0	0	0	0	0	0	0	0	0	0	0	0	0	0	0	0	0	0	0	0	0	0	0	0	0	0	0	0	0	0	0	0
d__Bacteria|p__Bacteroidota|c__Bacteroidia|o__Bacteroidales|f__Dysgonomonadaceae|g__Dysgonomonas|s__Dysgonomonas_unclassified	0	0	0	0	0	0	0	0	0	0	0	0	0	0	0	0	0	0	0	0	0	0	0	0	0	0	0	0	0	0	0	0	0	0	0	0	0	0	0	0	0	0	0	0	0	0	0	0	0
d__Bacteria|p__Bacteroidota|c__Bacteroidia|o__Bacteroidales|f__Dysgonomonadaceae|g__Proteiniphilum	0.06544	0	0	0	0	0	0	0	0	0	0	0	0	0.00398	4.31025	5.93599	0	0	0	0	0	0	0.01894	0	0	0	0	0	0	0	0	0	0	0	0	0	0	0	0	0	0	0	0	0	0	0	0	0	0
d__Bacteria|p__Bacteroidota|c__Bacteroidia|o__Bacteroidales|f__Dysgonomonadaceae|g__Proteiniphilum|s__Proteiniphilum_unclassified	0.06544	0	0	0	0	0	0	0	0	0	0	0	0	0.00398	4.31025	5.93599	0	0	0	0	0	0	0.01894	0	0	0	0	0	0	0	0	0	0	0	0	0	0	0	0	0	0	0	0	0	0	0	0	0	0
d__Bacteria|p__Bacteroidota|c__Bacteroidia|o__Bacteroidales|f__ML635J-40_aquatic_group	0	0	0	0	0	0	0	0	0	0	0	0	0	0	0	0	0	0	0	0	0	0	0	0	0	0	0	0	0	0	0	0	0	0	0	0	0	0	0	0	0	0	0	0	0	0	0	0	0
d__Bacteria|p__Bacteroidota|c__Bacteroidia|o__Bacteroidales|f__ML635J-40_aquatic_group|g__ML635J-40_aquatic_group_unclassified	0	0	0	0	0	0	0	0	0	0	0	0	0	0	0	0	0	0	0	0	0	0	0	0	0	0	0	0	0	0	0	0	0	0	0	0	0	0	0	0	0	0	0	0	0	0	0	0	0
d__Bacteria|p__Bacteroidota|c__Bacteroidia|o__Bacteroidales|f__ML635J-40_aquatic_group|g__ML635J-40_aquatic_group_unclassified|s__ML635J-40_aquatic_group_unclassified	0	0	0	0	0	0	0	0	0	0	0	0	0	0	0	0	0	0	0	0	0	0	0	0	0	0	0	0	0	0	0	0	0	0	0	0	0	0	0	0	0	0	0	0	0	0	0	0	0
d__Bacteria|p__Bacteroidota|c__Bacteroidia|o__Bacteroidales|f__Marinifilaceae	0	0.01419	0.94235	1.23757	0.33312	0.23419	0	0	3.35024	2.7531	1.17224	0.86976	0.99448	1.15528	0.63465	0.91556	0.33965	0.58151	0.2354	0.50851	0.07257	0.1479	0	0	0	0	0.00576	0	0.26299	0.09289	0.36829	0.40922	0.10375	0.01882	0.02678	0	0.04395	0.00939	0	0	0	0	0	0	0	0	0.04322	0	0.04672
d__Bacteria|p__Bacteroidota|c__Bacteroidia|o__Bacteroidales|f__Marinifilaceae|g__Butyricimonas	0	0	0.06812	0.37914	0.13467	0.04898	0	0	3.15516	2.58975	0.83154	0.66964	0.67381	0.91626	0.0287	0	0	0.08119	0	0	0	0	0	0	0	0	0	0	0.26299	0.09289	0.32789	0.40922	0.10375	0.01882	0.01832	0	0.03581	0.00939	0	0	0	0	0	0	0	0	0.04322	0	0.04672
d__Bacteria|p__Bacteroidota|c__Bacteroidia|o__Bacteroidales|f__Marinifilaceae|g__Butyricimonas|s__Butyricimonas_unclassified	0	0	0.06812	0.37914	0.13467	0.04898	0	0	3.15516	2.58975	0.83154	0.66964	0.67381	0.91626	0.0287	0	0	0.08119	0	0	0	0	0	0	0	0	0	0	0.26299	0.09289	0.32789	0.40922	0.10375	0.01882	0.01832	0	0.03581	0.00939	0	0	0	0	0	0	0	0	0.04322	0	0.04672
d__Bacteria|p__Bacteroidota|c__Bacteroidia|o__Bacteroidales|f__Marinifilaceae|g__Marinifilaceae_unclassified	0	0	0	0	0	0	0	0	0	0	0	0	0	0	0	0	0	0	0	0	0	0	0	0	0	0	0	0	0	0	0	0	0	0	0	0	0	0	0	0	0	0	0	0	0	0	0	0	0
d__Bacteria|p__Bacteroidota|c__Bacteroidia|o__Bacteroidales|f__Marinifilaceae|g__Marinifilaceae_unclassified|s__Marinifilaceae_unclassified	0	0	0	0	0	0	0	0	0	0	0	0	0	0	0	0	0	0	0	0	0	0	0	0	0	0	0	0	0	0	0	0	0	0	0	0	0	0	0	0	0	0	0	0	0	0	0	0	0
d__Bacteria|p__Bacteroidota|c__Bacteroidia|o__Bacteroidales|f__Marinifilaceae|g__Odoribacter	0	0.01419	0.87423	0.85843	0.19845	0.18521	0	0	0.18151	0.16335	0.3407	0.20012	0.32067	0.23902	0.60595	0.91556	0.33965	0.50032	0.2354	0.50851	0.07257	0.1479	0	0	0	0	0.00576	0	0	0	0.0404	0	0	0	0.00846	0	0.00814	0	0	0	0	0	0	0	0	0	0	0	0
d__Bacteria|p__Bacteroidota|c__Bacteroidia|o__Bacteroidales|f__Marinifilaceae|g__Odoribacter|s__Odoribacter_unclassified	0	0.01419	0.87423	0.85843	0.19845	0.18521	0	0	0.18151	0.16335	0.3407	0.20012	0.32067	0.23902	0.60595	0.91556	0.33965	0.50032	0.2354	0.50851	0.07257	0.1479	0	0	0	0	0.00576	0	0	0	0.0404	0	0	0	0.00846	0	0.00814	0	0	0	0	0	0	0	0	0	0	0	0
d__Bacteria|p__Bacteroidota|c__Bacteroidia|o__Bacteroidales|f__Marinifilaceae|g__Sanguibacteroides	0	0	0	0	0	0	0	0	0.01357	0	0	0	0	0	0	0	0	0	0	0	0	0	0	0	0	0	0	0	0	0	0	0	0	0	0	0	0	0	0	0	0	0	0	0	0	0	0	0	0
d__Bacteria|p__Bacteroidota|c__Bacteroidia|o__Bacteroidales|f__Marinifilaceae|g__Sanguibacteroides|s__Sanguibacteroides_unclassified	0	0	0	0	0	0	0	0	0.01357	0	0	0	0	0	0	0	0	0	0	0	0	0	0	0	0	0	0	0	0	0	0	0	0	0	0	0	0	0	0	0	0	0	0	0	0	0	0	0	0
d__Bacteria|p__Bacteroidota|c__Bacteroidia|o__Bacteroidales|f__Muribaculaceae	0.0818	0.43287	0.02271	0.093	0	0.00459	0.00653	0	0	0	0.0539	0.0077	0	0.00598	0.01435	0.01324	0	0	0.00515	0.01321	0	0	0.13257	0	0.00355	0	0	0.00888	0.00946	0.00726	0.20979	0.01542	0.00319	0.00403	0.00423	0.02966	0.00488	0	0.01297	0	0.01114	0.01867	0	0	0.15032	0	0	0	0
d__Bacteria|p__Bacteroidota|c__Bacteroidia|o__Bacteroidales|f__Muribaculaceae|g__Duncaniella	0	0	0	0	0	0	0	0	0	0	0	0	0	0	0	0	0	0	0	0	0	0	0	0	0	0	0	0	0	0	0	0	0	0	0	0	0	0	0	0	0	0	0	0	0	0	0	0	0
d__Bacteria|p__Bacteroidota|c__Bacteroidia|o__Bacteroidales|f__Muribaculaceae|g__Duncaniella|s__Duncaniella_muris	0	0	0	0	0	0	0	0	0	0	0	0	0	0	0	0	0	0	0	0	0	0	0	0	0	0	0	0	0	0	0	0	0	0	0	0	0	0	0	0	0	0	0	0	0	0	0	0	0
d__Bacteria|p__Bacteroidota|c__Bacteroidia|o__Bacteroidales|f__Muribaculaceae|g__Muribaculaceae_unclassified	0.0818	0.43287	0.02271	0.05723	0	0.00459	0.00653	0	0	0	0.0539	0.0077	0	0.00598	0.01435	0.01324	0	0	0.00515	0.01321	0	0	0.13257	0	0.00355	0	0	0.00533	0.00568	0.00726	0.20513	0.01542	0.00319	0.00403	0	0.02966	0.00488	0	0.01297	0	0.01114	0.01867	0	0	0.122	0	0	0	0
d__Bacteria|p__Bacteroidota|c__Bacteroidia|o__Bacteroidales|f__Muribaculaceae|g__Muribaculaceae_unclassified|s__Muribaculaceae_unclassified	0.0818	0.43287	0.02271	0.05723	0	0.00459	0.00653	0	0	0	0.0539	0.0077	0	0.00598	0.01435	0.01324	0	0	0.00515	0.01321	0	0	0.13257	0	0.00355	0	0	0.00533	0.00568	0.00726	0.20513	0.01542	0.00319	0.00403	0	0.02966	0.00488	0	0.01297	0	0.01114	0.01867	0	0	0.122	0	0	0	0
d__Bacteria|p__Bacteroidota|c__Bacteroidia|o__Bacteroidales|f__Muribaculaceae|g__Muribaculum	0	0	0	0.03577	0	0	0	0	0	0	0	0	0	0	0	0	0	0	0	0	0	0	0	0	0	0	0	0	0.00378	0	0.00466	0	0	0	0.00423	0	0	0	0	0	0	0	0	0	0.02832	0	0	0	0
d__Bacteria|p__Bacteroidota|c__Bacteroidia|o__Bacteroidales|f__Muribaculaceae|g__Muribaculum|s__Muribaculum_sp.	0	0	0	0.03577	0	0	0	0	0	0	0	0	0	0	0	0	0	0	0	0	0	0	0	0	0	0	0	0	0.00378	0	0.00466	0	0	0	0.00423	0	0	0	0	0	0	0	0	0	0.02832	0	0	0	0
d__Bacteria|p__Bacteroidota|c__Bacteroidia|o__Bacteroidales|f__Muribaculaceae|g__Paramuribaculum	0	0	0	0	0	0	0	0	0	0	0	0	0	0	0	0	0	0	0	0	0	0	0	0	0	0	0	0.00355	0	0	0	0	0	0	0	0	0	0	0	0	0	0	0	0	0	0	0	0	0
d__Bacteria|p__Bacteroidota|c__Bacteroidia|o__Bacteroidales|f__Muribaculaceae|g__Paramuribaculum|s__Paramuribaculum_intestinale	0	0	0	0	0	0	0	0	0	0	0	0	0	0	0	0	0	0	0	0	0	0	0	0	0	0	0	0.00355	0	0	0	0	0	0	0	0	0	0	0	0	0	0	0	0	0	0	0	0	0
d__Bacteria|p__Bacteroidota|c__Bacteroidia|o__Bacteroidales|f__Paludibacteraceae	0	0	0.00568	0	0	0	0	0	0	0	0	0	0	0	0	0.06242	0	0	0	0	0	0	0	0	0	0	0	0	0.00568	0	0	0	0	0	0.00705	0	0	0	0	0.01017	0	0.04667	0	0	0	0	0.00665	0.1132	0
d__Bacteria|p__Bacteroidota|c__Bacteroidia|o__Bacteroidales|f__Paludibacteraceae|g__F0058	0	0	0	0	0	0	0	0	0	0	0	0	0	0	0	0	0	0	0	0	0	0	0	0	0	0	0	0	0	0	0	0	0	0	0	0	0	0	0	0	0	0	0	0	0	0	0	0	0
d__Bacteria|p__Bacteroidota|c__Bacteroidia|o__Bacteroidales|f__Paludibacteraceae|g__F0058|s__F0058_unclassified	0	0	0	0	0	0	0	0	0	0	0	0	0	0	0	0	0	0	0	0	0	0	0	0	0	0	0	0	0	0	0	0	0	0	0	0	0	0	0	0	0	0	0	0	0	0	0	0	0
d__Bacteria|p__Bacteroidota|c__Bacteroidia|o__Bacteroidales|f__Paludibacteraceae|g__Paludibacter	0	0	0.00568	0	0	0	0	0	0	0	0	0	0	0	0	0.06242	0	0	0	0	0	0	0	0	0	0	0	0	0.00568	0	0	0	0	0	0.00705	0	0	0	0	0.01017	0	0.04667	0	0	0	0	0.00665	0.1132	0
d__Bacteria|p__Bacteroidota|c__Bacteroidia|o__Bacteroidales|f__Paludibacteraceae|g__Paludibacter|s__Paludibacter_unclassified	0	0	0	0	0	0	0	0	0	0	0	0	0	0	0	0.06242	0	0	0	0	0	0	0	0	0	0	0	0	0.00568	0	0	0	0	0	0.00705	0	0	0	0	0.01017	0	0.04667	0	0	0	0	0	0.1132	0
d__Bacteria|p__Bacteroidota|c__Bacteroidia|o__Bacteroidales|f__Paludibacteraceae|g__Paludibacter|s__uncultured_Paludibacter_sp.	0	0	0.00568	0	0	0	0	0	0	0	0	0	0	0	0	0	0	0	0	0	0	0	0	0	0	0	0	0	0	0	0	0	0	0	0	0	0	0	0	0	0	0	0	0	0	0	0.00665	0	0
d__Bacteria|p__Bacteroidota|c__Bacteroidia|o__Bacteroidales|f__Porphyromonadaceae	0	0	0.40306	0	0.01772	0.01683	0	0.01209	0.03902	0	0.01925	0.02117	0.02233	0	0.57247	0.26105	0	0	0.01375	0	0	0	0.01894	0.25982	0.15286	2.64774	1.3476	0	0.06811	0	0	0	0	0	0.04087	0.18786	0	0	0.27486	0.0436	0.12538	0.26138	0.00504	0.00268	0	0	0.00997	0	0.01668
d__Bacteria|p__Bacteroidota|c__Bacteroidia|o__Bacteroidales|f__Porphyromonadaceae|g__Porphyromonas	0	0	0.40306	0	0.01772	0.01683	0	0.01209	0.03902	0	0.01925	0.02117	0.02233	0	0.57247	0.26105	0	0	0.01375	0	0	0	0.01894	0.25982	0.15286	2.64774	1.3476	0	0.06811	0	0	0	0	0	0.04087	0.18786	0	0	0.27486	0.0436	0.12538	0.26138	0.00504	0.00268	0	0	0.00997	0	0.01668
d__Bacteria|p__Bacteroidota|c__Bacteroidia|o__Bacteroidales|f__Porphyromonadaceae|g__Porphyromonas|s__Porphyromonas_asaccharolytica	0	0	0	0	0	0	0	0	0	0	0	0	0	0	0	0	0	0	0	0	0	0	0	0	0	0	0	0	0	0	0	0	0	0	0	0	0	0	0.0363	0	0	0	0	0	0	0	0	0	0
d__Bacteria|p__Bacteroidota|c__Bacteroidia|o__Bacteroidales|f__Porphyromonadaceae|g__Porphyromonas|s__Porphyromonas_bennonis	0	0	0	0	0	0	0	0	0	0	0	0	0	0	0	0	0	0	0	0	0	0	0	0	0	0	0	0	0	0	0	0	0	0	0	0	0	0	0	0	0	0	0	0	0	0	0.00997	0	0.01001
d__Bacteria|p__Bacteroidota|c__Bacteroidia|o__Bacteroidales|f__Porphyromonadaceae|g__Porphyromonas|s__Porphyromonas_endodontalis	0	0	0	0	0	0.00765	0	0	0	0	0	0	0	0	0.10046	0	0	0	0	0	0	0	0	0	0.04799	0	0	0	0	0	0	0	0	0	0	0	0	0	0	0	0	0	0	0	0	0	0	0	0
d__Bacteria|p__Bacteroidota|c__Bacteroidia|o__Bacteroidales|f__Porphyromonadaceae|g__Porphyromonas|s__Porphyromonas_sp._2026	0	0	0	0	0	0	0	0	0	0	0	0	0	0	0	0	0	0	0	0	0	0	0	0	0	0	0	0	0	0	0	0	0	0	0	0	0	0	0	0	0.03065	0	0	0	0	0	0	0	0
d__Bacteria|p__Bacteroidota|c__Bacteroidia|o__Bacteroidales|f__Porphyromonadaceae|g__Porphyromonas|s__Porphyromonas_sp._feline_oral_taxon_139	0	0	0	0	0	0	0	0	0	0	0	0	0	0	0	0	0	0	0	0	0	0	0	0	0	0	0	0	0	0	0	0	0	0	0	0	0	0	0	0	0	0	0	0	0	0	0	0	0
d__Bacteria|p__Bacteroidota|c__Bacteroidia|o__Bacteroidales|f__Porphyromonadaceae|g__Porphyromonas|s__Porphyromonas_unclassified	0	0	0.32642	0	0.00709	0.00612	0	0.01209	0	0	0	0	0.01624	0	0.22803	0.01324	0	0	0.01375	0	0	0	0	0	0	0	0.15981	0	0	0	0	0	0	0	0	0	0	0	0.16077	0.0436	0.09473	0	0	0	0	0	0	0	0
d__Bacteria|p__Bacteroidota|c__Bacteroidia|o__Bacteroidales|f__Porphyromonadaceae|g__Porphyromonas|s__uncultured_Porphyromonas_sp.	0	0	0.07664	0	0.01063	0.00306	0	0	0.03902	0	0.01925	0.02117	0.00609	0	0.24398	0.24781	0	0	0	0	0	0	0.01894	0.25982	0.10487	2.64774	1.18779	0	0.06811	0	0	0	0	0	0.04087	0.18786	0	0	0.07779	0	0	0.26138	0.00504	0.00268	0	0	0	0	0.00667
d__Bacteria|p__Bacteroidota|c__Bacteroidia|o__Bacteroidales|f__Prevotellaceae	1.07158	1.02186	3.37487	2.9902	0.09391	0.11479	0.031	0.0257	0.17981	0.24961	0.01347	0.03272	0.03451	0.01793	1.05086	0.71883	0.06504	0.14264	0.46735	0.61417	0.23627	0.26554	1.03528	0.26512	0.04444	2.41618	1.70754	2.00512	0.19866	0.00581	4.00156	1.43786	0.02713	0.00403	0.10995	0.36583	6.59407	7.34773	1.80475	0.05813	0.12816	3.03383	0.15468	0.03489	0	0.02026	0.03823	0.01657	0
d__Bacteria|p__Bacteroidota|c__Bacteroidia|o__Bacteroidales|f__Prevotellaceae|g__Alloprevotella	0	0	0.06812	0	0	0.01071	0	0.00605	0	0	0	0.01155	0.01624	0	0.10206	0	0	0.04389	0.00515	0.0066	0.01519	0	0.17676	0	0	0	0.14397	1.6659	0	0.00581	0.02953	0	0	0.00403	0.03524	0	0	0.00939	0.19448	0.01308	0.08637	0.32205	0.00504	0	0	0.01091	0	0	0
d__Bacteria|p__Bacteroidota|c__Bacteroidia|o__Bacteroidales|f__Prevotellaceae|g__Alloprevotella|s__Alloprevotella_rava	0	0	0	0	0	0	0	0	0	0	0	0.01155	0	0	0	0	0	0	0	0	0	0	0	0	0	0	0	0	0	0	0.02176	0	0	0	0.00846	0	0	0	0	0	0	0	0	0	0	0	0	0	0
d__Bacteria|p__Bacteroidota|c__Bacteroidia|o__Bacteroidales|f__Prevotellaceae|g__Alloprevotella|s__Alloprevotella_tannerae	0	0	0	0	0	0	0	0	0	0	0	0	0.01624	0	0	0	0	0.04389	0	0	0.00675	0	0	0	0	0	0.02879	0	0	0	0	0	0	0	0	0	0	0	0.01815	0	0	0	0	0	0	0.01091	0	0	0
d__Bacteria|p__Bacteroidota|c__Bacteroidia|o__Bacteroidales|f__Prevotellaceae|g__Alloprevotella|s__Alloprevotella_unclassified	0	0	0.06812	0	0	0.01071	0	0.00605	0	0	0	0	0	0	0.10206	0	0	0	0.00515	0.0066	0.00844	0	0.17676	0	0	0	0.11518	1.6659	0	0.00581	0.00777	0	0	0.00403	0.02678	0	0	0.00939	0.17633	0.01308	0.08637	0.32205	0.00504	0	0	0	0	0	0
d__Bacteria|p__Bacteroidota|c__Bacteroidia|o__Bacteroidales|f__Prevotellaceae|g__Paraprevotella	0	0	0.05393	1.34487	0.09391	0.09643	0	0	0.17981	0.11563	0	0	0	0	0	0	0	0	0	0	0	0	0	0	0	0	0	0	0	0	0.4258	0	0	0	0	0	0	0	0	0	0	0	0	0	0	0	0	0	0
d__Bacteria|p__Bacteroidota|c__Bacteroidia|o__Bacteroidales|f__Prevotellaceae|g__Paraprevotella|s__Paraprevotella_unclassified	0	0	0.05393	1.34487	0	0	0	0	0.17981	0.11563	0	0	0	0	0	0	0	0	0	0	0	0	0	0	0	0	0	0	0	0	0.4258	0	0	0	0	0	0	0	0	0	0	0	0	0	0	0	0	0	0
d__Bacteria|p__Bacteroidota|c__Bacteroidia|o__Bacteroidales|f__Prevotellaceae|g__Paraprevotella|s__Paraprevotella_xylaniphila	0	0	0	0	0.09391	0.09643	0	0	0	0	0	0	0	0	0	0	0	0	0	0	0	0	0	0	0	0	0	0	0	0	0	0	0	0	0	0	0	0	0	0	0	0	0	0	0	0	0	0	0
d__Bacteria|p__Bacteroidota|c__Bacteroidia|o__Bacteroidales|f__Prevotellaceae|g__Prevotella	0.17178	1.02186	0	0	0	0.00765	0.01958	0	0	0.06607	0.0077	0.02117	0	0	0.52782	0.17404	0	0.03511	0.00515	0.00495	0.03713	0.0084	0.29038	0.08484	0.00889	2.41618	0.91857	0	0.0227	0	0.23465	0.92915	0	0	0.06625	0.2546	6.59407	7.33521	0.45378	0.00581	0.00836	0.028	0.10256	0.02684	0	0	0.00831	0.01657	0
d__Bacteria|p__Bacteroidota|c__Bacteroidia|o__Bacteroidales|f__Prevotellaceae|g__Prevotella_7	0	0	0	0	0	0	0.01142	0.01058	0	0	0.00577	0	0.01827	0	0.27587	0.02459	0.00964	0.06364	0	0	0.01519	0.00672	0.42295	0.18028	0	0	0.64068	0.33922	0.12298	0	0	0	0.00638	0	0.00846	0.11123	0	0	1.09944	0.0218	0.03343	2.68378	0.04708	0.00537	0	0	0.00332	0	0
d__Bacteria|p__Bacteroidota|c__Bacteroidia|o__Bacteroidales|f__Prevotellaceae|g__Prevotella_7|s__Prevotella_7_unclassified	0	0	0	0	0	0	0.01142	0.01058	0	0	0.00577	0	0.01827	0	0.27587	0.02459	0.00964	0.06364	0	0	0.01519	0.00672	0.42295	0.18028	0	0	0.64068	0.33922	0.12298	0	0	0	0.00638	0	0.00846	0.11123	0	0	1.09944	0.0218	0.03343	2.68378	0.04708	0.00537	0	0	0.00332	0	0
d__Bacteria|p__Bacteroidota|c__Bacteroidia|o__Bacteroidales|f__Prevotellaceae|g__Prevotella_9	0.8998	0	3.25282	1.64533	0	0	0	0.00907	0	0	0	0	0	0.01793	0.14192	0.48804	0.0554	0	0.45705	0.60262	0.16876	0.25042	0.14519	0	0.03555	0	0.00432	0	0.05298	0	3.31158	0.50451	0.02075	0	0	0	0	0	0.05705	0.01744	0	0	0	0.00268	0	0.00935	0.0266	0	0
d__Bacteria|p__Bacteroidota|c__Bacteroidia|o__Bacteroidales|f__Prevotellaceae|g__Prevotella_9|s__Prevotella_9_unclassified	0.8998	0	3.25282	1.64533	0	0	0	0.00907	0	0	0	0	0	0.01793	0.14192	0.48804	0.0554	0	0.45705	0.60262	0.16876	0.25042	0.14519	0	0.03555	0	0.00432	0	0.05298	0	3.31158	0.50451	0.02075	0	0	0	0	0	0.05705	0.01744	0	0	0	0.00268	0	0.00935	0.0266	0	0
d__Bacteria|p__Bacteroidota|c__Bacteroidia|o__Bacteroidales|f__Prevotellaceae|g__Prevotellaceae_Ga6A1_group	0	0	0	0	0	0	0	0	0	0	0	0	0	0	0	0	0	0	0	0	0	0	0	0	0	0	0	0	0	0	0	0	0	0	0	0	0	0	0	0	0	0	0	0	0	0	0	0	0
d__Bacteria|p__Bacteroidota|c__Bacteroidia|o__Bacteroidales|f__Prevotellaceae|g__Prevotellaceae_Ga6A1_group|s__Prevotellaceae_Ga6A1_group_unclassified	0	0	0	0	0	0	0	0	0	0	0	0	0	0	0	0	0	0	0	0	0	0	0	0	0	0	0	0	0	0	0	0	0	0	0	0	0	0	0	0	0	0	0	0	0	0	0	0	0
d__Bacteria|p__Bacteroidota|c__Bacteroidia|o__Bacteroidales|f__Prevotellaceae|g__Prevotellaceae_NK3B31_group	0	0	0	0	0	0	0	0	0	0.06791	0	0	0	0	0.00319	0.03216	0	0	0	0	0	0	0	0	0	0	0	0	0	0	0	0	0	0	0	0	0	0	0	0	0	0	0	0	0	0	0	0	0
d__Bacteria|p__Bacteroidota|c__Bacteroidia|o__Bacteroidales|f__Prevotellaceae|g__Prevotellaceae_NK3B31_group|s__Prevotellaceae_NK3B31_group_unclassified	0	0	0	0	0	0	0	0	0	0.06791	0	0	0	0	0.00319	0.03216	0	0	0	0	0	0	0	0	0	0	0	0	0	0	0	0	0	0	0	0	0	0	0	0	0	0	0	0	0	0	0	0	0
d__Bacteria|p__Bacteroidota|c__Bacteroidia|o__Bacteroidales|f__Prevotellaceae|g__Prevotellaceae_UCG-001	0	0	0	0	0	0	0	0	0	0	0	0	0	0	0	0	0	0	0	0	0	0	0	0	0	0	0	0	0	0	0	0.0042	0	0	0	0	0	0.00313	0	0	0	0	0	0	0	0	0	0	0
d__Bacteria|p__Bacteroidota|c__Bacteroidia|o__Bacteroidales|f__Prevotellaceae|g__Prevotellaceae_UCG-001|s__Prevotellaceae_UCG-001_unclassified	0	0	0	0	0	0	0	0	0	0	0	0	0	0	0	0	0	0	0	0	0	0	0	0	0	0	0	0	0	0	0	0.0042	0	0	0	0	0	0.00313	0	0	0	0	0	0	0	0	0	0	0
d__Bacteria|p__Bacteroidota|c__Bacteroidia|o__Bacteroidales|f__Prevotellaceae|g__Prevotellaceae_unclassified	0	0	0	0	0	0	0	0	0	0	0	0	0	0	0	0	0	0	0	0	0	0	0	0	0	0	0	0	0	0	0	0	0	0	0	0	0	0	0	0	0	0	0	0	0	0	0	0	0
d__Bacteria|p__Bacteroidota|c__Bacteroidia|o__Bacteroidales|f__Prevotellaceae|g__Prevotellaceae_unclassified|s__Prevotellaceae_unclassified	0	0	0	0	0	0	0	0	0	0	0	0	0	0	0	0	0	0	0	0	0	0	0	0	0	0	0	0	0	0	0	0	0	0	0	0	0	0	0	0	0	0	0	0	0	0	0	0	0
d__Bacteria|p__Bacteroidota|c__Bacteroidia|o__Bacteroidales|f__Prevotellaceae|g__Prevotella|s__Prevotella_buccae	0	0	0	0	0	0	0	0	0	0	0	0	0	0	0	0	0	0	0	0	0	0	0	0	0	0	0.00576	0	0	0	0	0	0	0	0	0	0	0	0	0	0	0	0	0	0	0	0	0	0
d__Bacteria|p__Bacteroidota|c__Bacteroidia|o__Bacteroidales|f__Prevotellaceae|g__Prevotella|s__Prevotella_buccalis	0	0	0	0	0	0	0	0	0	0	0	0	0	0	0	0	0	0	0	0	0	0	0	0	0	0	0	0	0	0	0	0	0	0	0	0	0	0	0	0	0	0	0	0	0	0	0	0	0
d__Bacteria|p__Bacteroidota|c__Bacteroidia|o__Bacteroidales|f__Prevotellaceae|g__Prevotella|s__Prevotella_corporis	0	0.07806	0	0	0	0	0	0	0	0	0	0	0	0	0	0	0	0	0	0	0	0	0	0	0	0	0	0	0	0	0	0.74696	0	0	0.03665	0	0	0	0	0	0	0	0	0	0	0	0	0	0
d__Bacteria|p__Bacteroidota|c__Bacteroidia|o__Bacteroidales|f__Prevotellaceae|g__Prevotella|s__Prevotella_intermedia	0	0	0	0	0	0	0	0	0	0	0	0	0	0	0	0	0	0	0	0	0	0	0	0	0	0	0.08063	0	0	0	0	0	0	0	0	0	0	0	0	0	0	0	0	0	0	0	0	0	0
d__Bacteria|p__Bacteroidota|c__Bacteroidia|o__Bacteroidales|f__Prevotellaceae|g__Prevotella|s__Prevotella_nanceiensis	0	0	0	0	0	0	0.01632	0	0	0.06607	0	0	0	0	0.24398	0.14377	0	0	0	0	0.03038	0	0.05681	0.08484	0	2.39605	0.40745	0	0.0227	0	0	0	0	0	0	0	0	0	0	0	0	0	0.03363	0.01342	0	0	0	0	0
d__Bacteria|p__Bacteroidota|c__Bacteroidia|o__Bacteroidales|f__Prevotellaceae|g__Prevotella|s__Prevotella_nigrescens	0	0	0	0	0	0	0.00326	0	0	0	0	0	0	0	0	0	0	0.03511	0	0	0	0	0	0	0	0	0.03743	0	0	0	0	0	0	0	0	0	0	0	0	0	0	0	0.0538	0	0	0	0	0	0
d__Bacteria|p__Bacteroidota|c__Bacteroidia|o__Bacteroidales|f__Prevotellaceae|g__Prevotella|s__Prevotella_pallens	0	0	0	0	0	0	0	0	0	0	0	0	0	0	0.16265	0	0	0	0	0	0	0	0	0	0	0	0	0	0	0	0	0	0	0	0	0	0	0	0	0	0	0	0	0	0	0	0	0	0
d__Bacteria|p__Bacteroidota|c__Bacteroidia|o__Bacteroidales|f__Prevotellaceae|g__Prevotella|s__Prevotella_salivae	0	0	0	0	0	0	0	0	0	0	0	0	0	0	0	0	0	0	0	0	0	0	0	0	0	0	0	0	0	0	0	0	0	0	0	0	0	0	0.0752	0	0	0	0	0	0	0	0	0	0
d__Bacteria|p__Bacteroidota|c__Bacteroidia|o__Bacteroidales|f__Prevotellaceae|g__Prevotella|s__Prevotella_shahii	0	0	0	0	0	0	0	0	0	0	0	0.01347	0	0	0	0	0	0	0	0	0	0	0	0	0	0	0.01152	0	0	0	0	0	0	0	0	0	0	0	0	0	0	0	0	0	0	0	0	0	0
d__Bacteria|p__Bacteroidota|c__Bacteroidia|o__Bacteroidales|f__Prevotellaceae|g__Prevotella|s__Prevotella_sp._Marseille-P4119	0	0	0	0	0	0	0	0	0	0	0	0	0	0	0	0	0	0	0	0	0	0	0	0	0	0	0	0	0	0	0.20979	0.18219	0	0	0	0	0	0	0	0	0	0	0	0	0	0	0	0	0
d__Bacteria|p__Bacteroidota|c__Bacteroidia|o__Bacteroidales|f__Prevotellaceae|g__Prevotella|s__Prevotella_sp._canine_oral_taxon_372	0	0	0	0	0	0	0	0	0	0	0	0	0	0	0	0	0	0	0	0	0	0	0	0	0	0	0	0	0	0	0	0	0	0	0	0.01236	0	0	0	0	0	0	0	0	0	0	0	0	0
d__Bacteria|p__Bacteroidota|c__Bacteroidia|o__Bacteroidales|f__Prevotellaceae|g__Prevotella|s__Prevotella_sp._oral_taxon_299	0	0	0	0	0	0	0	0	0	0	0	0	0	0	0	0	0	0	0	0	0	0	0	0	0	0	0.35706	0	0	0	0	0	0	0	0	0	0	0	0	0	0	0	0	0	0	0	0	0	0
d__Bacteria|p__Bacteroidota|c__Bacteroidia|o__Bacteroidales|f__Prevotellaceae|g__Prevotella|s__Prevotella_stercorea	0	0	0	0	0	0	0	0	0	0	0	0	0	0	0	0	0	0	0	0	0	0	0	0	0	0	0	0	0	0	0	0	0	0	0	0	0	0	0	0	0	0	0	0.00805	0	0	0	0	0
d__Bacteria|p__Bacteroidota|c__Bacteroidia|o__Bacteroidales|f__Prevotellaceae|g__Prevotella|s__Prevotella_timonensis	0	0	0	0	0	0	0	0	0	0	0	0.0077	0	0	0	0	0	0	0	0	0	0	0	0	0	0	0	0	0	0	0	0	0	0	0	0	0	0	0	0	0	0	0	0	0	0	0	0	0
d__Bacteria|p__Bacteroidota|c__Bacteroidia|o__Bacteroidales|f__Prevotellaceae|g__Prevotella|s__Prevotella_unclassified	0.17178	0.9438	0	0	0	0	0	0	0	0	0.0077	0	0	0	0	0	0	0	0	0.00495	0	0	0.23357	0	0	0.02013	0.00432	0	0	0	0.02486	0	0	0	0.00705	0.24224	6.59407	7.33521	0	0	0	0	0	0.00537	0	0	0.00831	0.01657	0
d__Bacteria|p__Bacteroidota|c__Bacteroidia|o__Bacteroidales|f__Prevotellaceae|g__Prevotella|s__uncultured_Prevotella_sp.	0	0	0	0	0	0.00765	0	0	0	0	0	0	0	0	0.12119	0.03027	0	0	0.00515	0	0.00675	0.0084	0	0	0.00889	0	0.0144	0	0	0	0	0	0	0	0.02255	0	0	0	0.37858	0.00581	0.00836	0.028	0.01513	0	0	0	0	0	0
d__Bacteria|p__Bacteroidota|c__Bacteroidia|o__Bacteroidales|f__Rikenellaceae	0	0.23418	1.64059	2.05308	0.29592	0.20971	0	0	1.96095	1.44446	5.07777	4.62401	4.13014	3.5057	0.09727	0.30456	0.62871	0.88653	0.38145	0.62243	0.3679	0.2521	0	0	0.18841	0	0	0.01243	0.13433	0.23947	1.85081	1.62285	0.00319	0.00269	0.45666	0.22246	0.01139	0.02192	0	0	0	0	0	0	0	0	0.01829	0	0.01836
d__Bacteria|p__Bacteroidota|c__Bacteroidia|o__Bacteroidales|f__Rikenellaceae|g__Alistipes	0	0.23418	1.64059	2.05308	0.29592	0.20971	0	0	1.96095	1.44446	5.07777	4.62401	4.13014	3.5057	0.09727	0.30456	0.62871	0.88653	0.38145	0.62243	0.3679	0.2521	0	0	0.18841	0	0	0.01243	0.13433	0.23947	1.85081	1.62285	0.00319	0	0.45666	0.22246	0.01139	0.02192	0	0	0	0	0	0	0	0	0.01829	0	0.01836
d__Bacteria|p__Bacteroidota|c__Bacteroidia|o__Bacteroidales|f__Rikenellaceae|g__Alistipes|s__Alistipes_ihumii	0	0	0	0	0	0	0	0	0	0	0.05005	0.02502	0.0203	0	0	0	0	0	0	0	0	0	0	0	0	0	0	0	0	0	0.2331	0.01822	0	0	0	0	0	0	0	0	0	0	0	0	0	0	0	0	0
d__Bacteria|p__Bacteroidota|c__Bacteroidia|o__Bacteroidales|f__Rikenellaceae|g__Alistipes|s__Alistipes_indistinctus	0	0	0.13908	0	0	0	0	0	0.03902	0.03671	0.0154	0	0.00609	0	0	0	0.01204	0	0.02577	0.05944	0.01519	0.00504	0	0	0	0	0	0	0	0	0.71018	0.45126	0	0	0	0	0	0	0	0	0	0	0	0	0	0	0	0	0
d__Bacteria|p__Bacteroidota|c__Bacteroidia|o__Bacteroidales|f__Rikenellaceae|g__Alistipes|s__Alistipes_inops	0	0	0.2072	0	0	0	0	0	0.12383	0.08443	0	0	0	0	0	0	0	0	0	0	0	0	0	0	0	0	0	0	0	0	0	0	0	0	0	0	0	0	0	0	0	0	0	0	0	0	0	0	0
d__Bacteria|p__Bacteroidota|c__Bacteroidia|o__Bacteroidales|f__Rikenellaceae|g__Alistipes|s__Alistipes_massiliensis	0	0	0	0	0	0	0	0	0	0	0	0	0	0	0	0	0	0	0	0	0	0	0	0	0	0	0	0	0	0	0	0	0	0	0	0	0	0	0	0	0	0	0	0	0	0	0	0	0
d__Bacteria|p__Bacteroidota|c__Bacteroidia|o__Bacteroidales|f__Rikenellaceae|g__Alistipes|s__Alistipes_putredinis	0	0	0	0	0.10632	0	0	0	0	0	0	0	0	0	0	0	0	0	0	0	0	0	0	0	0	0	0	0	0	0	0	0	0	0	0	0	0	0	0	0	0	0	0	0	0	0	0	0	0
d__Bacteria|p__Bacteroidota|c__Bacteroidia|o__Bacteroidales|f__Rikenellaceae|g__Alistipes|s__Alistipes_senegalensis	0	0	0	0	0	0	0	0	0	0	0	0	0	0	0	0	0	0	0	0	0	0	0	0	0	0	0	0	0	0	0.00932	0	0	0	0	0	0	0	0	0	0	0	0	0	0	0	0	0	0
d__Bacteria|p__Bacteroidota|c__Bacteroidia|o__Bacteroidales|f__Rikenellaceae|g__Alistipes|s__Alistipes_shahii	0	0	0.19017	0.4006	0	0.0199	0	0	0	0	0	0	0	0	0.08611	0	0	0	0	0	0	0	0	0	0	0	0	0	0	0	0.11655	0	0	0	0.04933	0	0	0	0	0	0	0	0	0	0	0	0	0	0
d__Bacteria|p__Bacteroidota|c__Bacteroidia|o__Bacteroidales|f__Rikenellaceae|g__Alistipes|s__Alistipes_sp._S440	0	0	0	0	0	0	0	0	0	0	0	0.00385	0	0	0	0	0	0	0	0	0	0	0	0	0	0	0	0	0	0	0	0	0	0	0	0	0	0	0	0	0	0	0	0	0	0	0	0	0
d__Bacteria|p__Bacteroidota|c__Bacteroidia|o__Bacteroidales|f__Rikenellaceae|g__Alistipes|s__Alistipes_sp._S457	0	0	0.12489	0	0	0	0	0	1.76248	1.32332	0.22906	0.12893	0.12786	0.10159	0	0.30456	0.39987	0.40596	0.35568	0.56299	0.35271	0.24706	0	0	0	0	0	0	0	0	0.14918	0.11632	0	0	0	0	0	0.00626	0	0	0	0	0	0	0	0	0	0	0
d__Bacteria|p__Bacteroidota|c__Bacteroidia|o__Bacteroidales|f__Rikenellaceae|g__Alistipes|s__Alistipes_sp._cv1	0	0	0	0	0	0	0	0	0.03562	0	0	0	0	0	0	0	0	0	0	0	0	0	0	0	0	0	0	0	0	0	0.24553	0.02102	0	0	0	0.01977	0	0	0	0	0	0	0	0	0	0	0	0	0
d__Bacteria|p__Bacteroidota|c__Bacteroidia|o__Bacteroidales|f__Rikenellaceae|g__Alistipes|s__Alistipes_unclassified	0	0.23418	0.97925	1.65248	0.1896	0.18981	0	0	0	0	4.78326	4.46621	3.97589	3.40411	0.01116	0	0.2168	0.48057	0	0	0	0	0	0	0.18841	0	0	0.01243	0.13433	0.23947	0.38695	1.01603	0.00319	0	0.40733	0.20269	0.01139	0.01566	0	0	0	0	0	0	0	0	0.01829	0	0.01836
d__Bacteria|p__Bacteroidota|c__Bacteroidia|o__Bacteroidales|f__Rikenellaceae|g__Alistipes|s__uncultured_Alistipes_sp.	0	0	0	0	0	0	0	0	0	0	0	0	0	0	0	0	0	0	0	0	0	0	0	0	0	0	0	0	0	0	0	0	0	0	0	0	0	0	0	0	0	0	0	0	0	0	0	0	0
d__Bacteria|p__Bacteroidota|c__Bacteroidia|o__Bacteroidales|f__Rikenellaceae|g__DMER64	0	0	0	0	0	0	0	0	0	0	0	0	0	0	0	0	0	0	0	0	0	0	0	0	0	0	0	0	0	0	0	0	0	0	0	0	0	0	0	0	0	0	0	0	0	0	0	0	0
d__Bacteria|p__Bacteroidota|c__Bacteroidia|o__Bacteroidales|f__Rikenellaceae|g__DMER64|s__DMER64_unclassified	0	0	0	0	0	0	0	0	0	0	0	0	0	0	0	0	0	0	0	0	0	0	0	0	0	0	0	0	0	0	0	0	0	0	0	0	0	0	0	0	0	0	0	0	0	0	0	0	0
d__Bacteria|p__Bacteroidota|c__Bacteroidia|o__Bacteroidales|f__Rikenellaceae|g__Rikenellaceae_RC9_gut_group	0	0	0	0	0	0	0	0	0	0	0	0	0	0	0	0	0	0	0	0	0	0	0	0	0	0	0	0	0	0	0	0	0	0.00269	0	0	0	0	0	0	0	0	0	0	0	0	0	0	0
d__Bacteria|p__Bacteroidota|c__Bacteroidia|o__Bacteroidales|f__Rikenellaceae|g__Rikenellaceae_RC9_gut_group|s__Rikenellaceae_RC9_gut_group_unclassified	0	0	0	0	0	0	0	0	0	0	0	0	0	0	0	0	0	0	0	0	0	0	0	0	0	0	0	0	0	0	0	0	0	0.00269	0	0	0	0	0	0	0	0	0	0	0	0	0	0	0
d__Bacteria|p__Bacteroidota|c__Bacteroidia|o__Bacteroidales|f__Tannerellaceae	0	0	0.71812	0.18599	1.72585	1.19547	0.01958	0.00756	0.72264	0.98745	2.85648	2.5458	3.091	3.18501	0.11162	0.08702	0.64076	0.71756	1.35398	1.66422	0.70036	0.34286	0.2462	0.04242	0.01066	0	0.01584	0.01598	4.45377	1.57762	1.79332	1.51494	0.44532	0.19631	1.28685	1.15434	0.56808	0.31784	0.06483	0	0.03065	0.014	0	0	0.10239	0.07638	0.20448	0.11044	0.15853
d__Bacteria|p__Bacteroidota|c__Bacteroidia|o__Bacteroidales|f__Tannerellaceae|g__Parabacteroides	0	0	0.70393	0.18599	1.72585	1.18935	0.01958	0.00756	0.60729	0.68828	2.85648	2.5458	3.091	3.18501	0.02392	0.08702	0.59258	0.68903	1.35398	1.66422	0.70036	0.34286	0.2462	0.04242	0.01066	0	0.01584	0.01598	4.44999	1.57762	1.38773	1.15758	0.44532	0.19631	1.22201	1.00603	0.55669	0.31471	0	0	0.03065	0.014	0	0	0.10239	0.07638	0.20448	0.11044	0.15853
d__Bacteria|p__Bacteroidota|c__Bacteroidia|o__Bacteroidales|f__Tannerellaceae|g__Parabacteroides|s__Parabacteroides_distasonis	0	0	0.4655	0.18599	0.69282	0.44084	0	0	0.05259	0.04221	0	0	0	0	0	0	0	0	0	0	0	0	0	0.03712	0	0	0	0	2.78692	1.39185	0	0	0.28411	0.09009	0.76957	0.7193	0.20347	0.1644	0	0	0.03065	0	0	0	0	0	0.07315	0	0.05507
d__Bacteria|p__Bacteroidota|c__Bacteroidia|o__Bacteroidales|f__Tannerellaceae|g__Parabacteroides|s__Parabacteroides_faecis	0	0	0	0	0	0	0	0	0	0	0.02117	0	0	0	0	0	0	0	0	0	0	0	0	0	0	0	0	0	0	0	0	0	0	0	0	0	0	0	0	0	0	0	0	0	0	0	0	0	0
d__Bacteria|p__Bacteroidota|c__Bacteroidia|o__Bacteroidales|f__Tannerellaceae|g__Parabacteroides|s__Parabacteroides_goldsteinii	0	0	0	0	0	0	0	0	0.11874	0.03304	0	0	0	0	0	0	0	0	0	0	0	0	0	0	0	0	0	0	0	0	0	0.11632	0	0	0	0	0	0	0	0	0	0	0	0	0	0	0	0	0
d__Bacteria|p__Bacteroidota|c__Bacteroidia|o__Bacteroidales|f__Tannerellaceae|g__Parabacteroides|s__Parabacteroides_gordonii	0	0	0	0	0	0.0398	0	0	0.3223	0.3524	0	0	0	0	0	0	0	0	0	0	0	0	0	0	0	0	0	0	0	0	0	0	0	0	0.02537	0	0	0	0	0	0	0	0	0	0	0	0	0	0
d__Bacteria|p__Bacteroidota|c__Bacteroidia|o__Bacteroidales|f__Tannerellaceae|g__Parabacteroides|s__Parabacteroides_johnsonii	0	0	0	0	0	0	0	0	0	0	0	0	0	0	0	0	0	0	0	0	0	0	0	0	0.01066	0	0.01296	0	0	0	0	0	0	0	0	0	0	0	0	0	0	0	0	0	0	0	0	0	0
d__Bacteria|p__Bacteroidota|c__Bacteroidia|o__Bacteroidales|f__Tannerellaceae|g__Parabacteroides|s__Parabacteroides_sp.	0	0	0	0	0	0	0	0	0	0	0	0	0	0	0	0	0	0	0	0	0	0	0	0	0	0	0	0	0	0	0	0	0	0	0	0	0	0	0	0	0	0	0	0	0	0	0	0	0
d__Bacteria|p__Bacteroidota|c__Bacteroidia|o__Bacteroidales|f__Tannerellaceae|g__Parabacteroides|s__Parabacteroides_sp._J1502	0	0	0	0	0	0	0	0	0	0	0	0	0	0	0	0	0	0	0	0	0	0	0	0	0	0	0	0	0	0	0	0	0	0	0	0	0	0	0	0	0	0	0	0	0	0	0	0	0
d__Bacteria|p__Bacteroidota|c__Bacteroidia|o__Bacteroidales|f__Tannerellaceae|g__Parabacteroides|s__Parabacteroides_sp._dnLKV8	0	0	0	0	0	0	0	0	0	0	0	0	0	0	0	0	0	0	0	0	0	0	0	0	0	0	0	0	0	0	0	0	0.03831	0.01748	0.09866	0.10876	0	0	0	0	0	0	0	0	0	0	0	0	0
d__Bacteria|p__Bacteroidota|c__Bacteroidia|o__Bacteroidales|f__Tannerellaceae|g__Parabacteroides|s__Parabacteroides_sp._enrichment_culture	0	0	0	0	0	0	0	0	0	0	0	0	0	0	0	0	0	0	0	0	0	0	0	0	0	0	0	0	0	0	0	0	0	0	0	0	0	0	0	0	0	0	0	0	0	0	0	0	0
d__Bacteria|p__Bacteroidota|c__Bacteroidia|o__Bacteroidales|f__Tannerellaceae|g__Parabacteroides|s__Parabacteroides_timonensis	0	0	0	0	0	0	0	0	0	0	0	0	0	0	0	0	0	0	0	0	0	0	0	0	0	0	0	0	0	0	0	0	0	0	0	0	0	0	0	0	0	0	0	0	0	0	0	0	0
d__Bacteria|p__Bacteroidota|c__Bacteroidia|o__Bacteroidales|f__Tannerellaceae|g__Parabacteroides|s__Parabacteroides_unclassified	0	0	0	0	0.0567	0.05664	0.01958	0.00756	0.07125	0.06975	0.07122	0.03849	0.04465	0.00797	0	0	0.05781	0	0	0	0	0	0.03788	0.0053	0	0	0.00288	0.01598	0	0.17561	0.15851	0.62504	0.0415	0.02689	0.1635	0.17797	0	0	0	0	0	0.014	0	0	0.061	0	0	0	0
d__Bacteria|p__Bacteroidota|c__Bacteroidia|o__Bacteroidales|f__Tannerellaceae|g__Parabacteroides|s__uncultured_Parabacteroides_sp.	0	0	0.23843	0	0.97633	0.65207	0	0	0.04241	0.19088	2.76409	2.50731	3.04635	3.17704	0.02392	0.08702	0.53477	0.68903	1.35398	1.66422	0.70036	0.34286	0.20832	0	0	0	0	0	1.66307	0.01016	1.22922	0.41622	0.0814	0.06185	0.16491	0	0.35322	0.15031	0	0	0	0	0	0	0.04139	0.07638	0.13133	0.11044	0.10346
d__Bacteria|p__Bacteroidota|c__Bacteroidia|o__Bacteroidales|f__Tannerellaceae|g__Tannerella	0	0	0	0	0	0	0	0	0	0	0	0	0	0	0	0	0	0	0	0	0	0	0	0	0	0	0	0	0	0	0	0	0	0	0	0	0	0	0.06483	0	0	0	0	0	0	0	0	0	0
d__Bacteria|p__Bacteroidota|c__Bacteroidia|o__Bacteroidales|f__Tannerellaceae|g__Tannerellaceae_unclassified	0	0	0.01419	0	0	0.00612	0	0	0.11535	0.29917	0	0	0	0	0.0877	0	0.04818	0.02853	0	0	0	0	0	0	0	0	0	0	0.00378	0	0.40559	0.35736	0	0	0.06484	0.14831	0.01139	0.00313	0	0	0	0	0	0	0	0	0	0	0
d__Bacteria|p__Bacteroidota|c__Bacteroidia|o__Bacteroidales|f__Tannerellaceae|g__Tannerellaceae_unclassified|s__Tannerellaceae_unclassified	0	0	0.01419	0	0	0.00612	0	0	0.11535	0.29917	0	0	0	0	0.0877	0	0.04818	0.02853	0	0	0	0	0	0	0	0	0	0	0.00378	0	0.40559	0.35736	0	0	0.06484	0.14831	0.01139	0.00313	0	0	0	0	0	0	0	0	0	0	0
d__Bacteria|p__Bacteroidota|c__Bacteroidia|o__Bacteroidales|f__Tannerellaceae|g__Tannerella|s__Tannerella_forsythia	0	0	0	0	0	0	0	0	0	0	0	0	0	0	0	0	0	0	0	0	0	0	0	0	0	0	0	0	0	0	0	0	0	0	0	0	0	0	0.01556	0	0	0	0	0	0	0	0	0	0
d__Bacteria|p__Bacteroidota|c__Bacteroidia|o__Bacteroidales|f__Tannerellaceae|g__Tannerella|s__Tannerella_sp._SP18_4	0	0	0	0	0	0	0	0	0	0	0	0	0	0	0	0	0	0	0	0	0	0	0	0	0	0	0	0	0	0	0	0	0	0	0	0	0	0	0.04927	0	0	0	0	0	0	0	0	0	0
d__Bacteria|p__Bacteroidota|c__Bacteroidia|o__Bacteroidales|f__Williamwhitmaniaceae	0	0	0	0	0	0	0	0	0	0	0	0	0	0	0	0	0	0	0	0	0	0	0	0	0	0	0	0	0	0	0	0	0	0	0	0	0	0	0	0	0	0	0	0	0	0	0	0	0
d__Bacteria|p__Bacteroidota|c__Bacteroidia|o__Bacteroidales|f__Williamwhitmaniaceae|g__Blvii28_wastewater-sludge_group	0	0	0	0	0	0	0	0	0	0	0	0	0	0	0	0	0	0	0	0	0	0	0	0	0	0	0	0	0	0	0	0	0	0	0	0	0	0	0	0	0	0	0	0	0	0	0	0	0
d__Bacteria|p__Bacteroidota|c__Bacteroidia|o__Bacteroidales|f__Williamwhitmaniaceae|g__Blvii28_wastewater-sludge_group|s__Blvii28_wastewater-sludge_group_unclassified	0	0	0	0	0	0	0	0	0	0	0	0	0	0	0	0	0	0	0	0	0	0	0	0	0	0	0	0	0	0	0	0	0	0	0	0	0	0	0	0	0	0	0	0	0	0	0	0	0
d__Bacteria|p__Bacteroidota|c__Bacteroidia|o__Bacteroidales|f__p-2534-18B5_gut_group	0	0	0	0	0	0	0	0	0	0	0	0	0	0	0	0	0	0	0.00515	0	0	0	0	0	0	0	0	0	0	0	0	0	0	0	0	0	0	0	0	0	0	0	0	0	0	0	0	0	0
d__Bacteria|p__Bacteroidota|c__Bacteroidia|o__Bacteroidales|f__p-2534-18B5_gut_group|g__p-2534-18B5_gut_group_unclassified	0	0	0	0	0	0	0	0	0	0	0	0	0	0	0	0	0	0	0.00515	0	0	0	0	0	0	0	0	0	0	0	0	0	0	0	0	0	0	0	0	0	0	0	0	0	0	0	0	0	0
d__Bacteria|p__Bacteroidota|c__Bacteroidia|o__Bacteroidales|f__p-2534-18B5_gut_group|g__p-2534-18B5_gut_group_unclassified|s__p-2534-18B5_gut_group_unclassified	0	0	0	0	0	0	0	0	0	0	0	0	0	0	0	0	0	0	0.00515	0	0	0	0	0	0	0	0	0	0	0	0	0	0	0	0	0	0	0	0	0	0	0	0	0	0	0	0	0	0
d__Bacteria|p__Bacteroidota|c__Bacteroidia|o__Chitinophagales	0.1227	0	0	0	0	0	0	0	0	0	0	0	0	0	0	0	0	0	0	0	0.02363	0	0	0	0	0	0	0	0	0.10885	0	0	0	0	0	0	0	0	0	0	0.41236	0	0	0	0	0	0	0	0
d__Bacteria|p__Bacteroidota|c__Bacteroidia|o__Chitinophagales|f__Chitinophagaceae	0.1227	0	0	0	0	0	0	0	0	0	0	0	0	0	0	0	0	0	0	0	0.02363	0	0	0	0	0	0	0	0	0.10885	0	0	0	0	0	0	0	0	0	0	0.41236	0	0	0	0	0	0	0	0
d__Bacteria|p__Bacteroidota|c__Bacteroidia|o__Chitinophagales|f__Chitinophagaceae|g__Chitinophagaceae_unclassified	0	0	0	0	0	0	0	0	0	0	0	0	0	0	0	0	0	0	0	0	0.02363	0	0	0	0	0	0	0	0	0.10885	0	0	0	0	0	0	0	0	0	0	0	0	0	0	0	0	0	0	0
d__Bacteria|p__Bacteroidota|c__Bacteroidia|o__Chitinophagales|f__Chitinophagaceae|g__Chitinophagaceae_unclassified|s__Chitinophagaceae_unclassified	0	0	0	0	0	0	0	0	0	0	0	0	0	0	0	0	0	0	0	0	0.02363	0	0	0	0	0	0	0	0	0.10885	0	0	0	0	0	0	0	0	0	0	0	0	0	0	0	0	0	0	0
d__Bacteria|p__Bacteroidota|c__Bacteroidia|o__Chitinophagales|f__Chitinophagaceae|g__Dinghuibacter	0	0	0	0	0	0	0	0	0	0	0	0	0	0	0	0	0	0	0	0	0	0	0	0	0	0	0	0	0	0	0	0	0	0	0	0	0	0	0	0	0	0	0	0	0	0	0	0	0
d__Bacteria|p__Bacteroidota|c__Bacteroidia|o__Chitinophagales|f__Chitinophagaceae|g__Dinghuibacter|s__Dinghuibacter_unclassified	0	0	0	0	0	0	0	0	0	0	0	0	0	0	0	0	0	0	0	0	0	0	0	0	0	0	0	0	0	0	0	0	0	0	0	0	0	0	0	0	0	0	0	0	0	0	0	0	0
d__Bacteria|p__Bacteroidota|c__Bacteroidia|o__Chitinophagales|f__Chitinophagaceae|g__Flavisolibacter	0	0	0	0	0	0	0	0	0	0	0	0	0	0	0	0	0	0	0	0	0	0	0	0	0	0	0	0	0	0	0	0	0	0	0	0	0	0	0	0	0	0	0	0	0	0	0	0	0
d__Bacteria|p__Bacteroidota|c__Bacteroidia|o__Chitinophagales|f__Chitinophagaceae|g__Flavisolibacter|s__Flavisolibacter_unclassified	0	0	0	0	0	0	0	0	0	0	0	0	0	0	0	0	0	0	0	0	0	0	0	0	0	0	0	0	0	0	0	0	0	0	0	0	0	0	0	0	0	0	0	0	0	0	0	0	0
d__Bacteria|p__Bacteroidota|c__Bacteroidia|o__Chitinophagales|f__Chitinophagaceae|g__Parasegetibacter	0	0	0	0	0	0	0	0	0	0	0	0	0	0	0	0	0	0	0	0	0	0	0	0	0	0	0	0	0	0	0	0	0	0	0	0	0	0	0	0	0	0	0	0	0	0	0	0	0
d__Bacteria|p__Bacteroidota|c__Bacteroidia|o__Chitinophagales|f__Chitinophagaceae|g__Parasegetibacter|s__Parasegetibacter_unclassified	0	0	0	0	0	0	0	0	0	0	0	0	0	0	0	0	0	0	0	0	0	0	0	0	0	0	0	0	0	0	0	0	0	0	0	0	0	0	0	0	0	0	0	0	0	0	0	0	0
d__Bacteria|p__Bacteroidota|c__Bacteroidia|o__Chitinophagales|f__Chitinophagaceae|g__Sediminibacterium	0.1227	0	0	0	0	0	0	0	0	0	0	0	0	0	0	0	0	0	0	0	0	0	0	0	0	0	0	0	0	0	0	0	0	0	0	0	0	0	0	0	0	0	0	0	0	0	0	0	0
d__Bacteria|p__Bacteroidota|c__Bacteroidia|o__Chitinophagales|f__Chitinophagaceae|g__Sediminibacterium|s__Sediminibacterium_unclassified	0.1227	0	0	0	0	0	0	0	0	0	0	0	0	0	0	0	0	0	0	0	0	0	0	0	0	0	0	0	0	0	0	0	0	0	0	0	0	0	0	0	0	0	0	0	0	0	0	0	0
d__Bacteria|p__Bacteroidota|c__Bacteroidia|o__Chitinophagales|f__Chitinophagaceae|g__Terrimonas	0	0	0	0	0	0	0	0	0	0	0	0	0	0	0	0	0	0	0	0	0	0	0	0	0	0	0	0	0	0	0	0	0	0	0	0	0	0	0	0	0.41236	0	0	0	0	0	0	0	0
d__Bacteria|p__Bacteroidota|c__Bacteroidia|o__Chitinophagales|f__Chitinophagaceae|g__Terrimonas|s__Terrimonas_unclassified	0	0	0	0	0	0	0	0	0	0	0	0	0	0	0	0	0	0	0	0	0	0	0	0	0	0	0	0	0	0	0	0	0	0	0	0	0	0	0	0	0.41236	0	0	0	0	0	0	0	0
d__Bacteria|p__Bacteroidota|c__Bacteroidia|o__Cytophagales	0	0	0	0	0	0	0	0	0	0	0	0	0	0	0	0	0	0	0	0	0.00338	0	0	0	0	0	0	0	0	0	0.00466	0	0	0	0	0	0	0	0	0.04215	0	0	0	0	0	0	0	0	0
d__Bacteria|p__Bacteroidota|c__Bacteroidia|o__Cytophagales|f__Cytophagaceae	0	0	0	0	0	0	0	0	0	0	0	0	0	0	0	0	0	0	0	0	0	0	0	0	0	0	0	0	0	0	0	0	0	0	0	0	0	0	0	0.01308	0	0	0	0	0	0	0	0	0
d__Bacteria|p__Bacteroidota|c__Bacteroidia|o__Cytophagales|f__Cytophagaceae|g__Cytophaga	0	0	0	0	0	0	0	0	0	0	0	0	0	0	0	0	0	0	0	0	0	0	0	0	0	0	0	0	0	0	0	0	0	0	0	0	0	0	0	0	0	0	0	0	0	0	0	0	0
d__Bacteria|p__Bacteroidota|c__Bacteroidia|o__Cytophagales|f__Cytophagaceae|g__Cytophaga|s__Cytophaga_unclassified	0	0	0	0	0	0	0	0	0	0	0	0	0	0	0	0	0	0	0	0	0	0	0	0	0	0	0	0	0	0	0	0	0	0	0	0	0	0	0	0	0	0	0	0	0	0	0	0	0
d__Bacteria|p__Bacteroidota|c__Bacteroidia|o__Cytophagales|f__Cytophagaceae|g__Siphonobacter	0	0	0	0	0	0	0	0	0	0	0	0	0	0	0	0	0	0	0	0	0	0	0	0	0	0	0	0	0	0	0	0	0	0	0	0	0	0	0	0.01308	0	0	0	0	0	0	0	0	0
d__Bacteria|p__Bacteroidota|c__Bacteroidia|o__Cytophagales|f__Cytophagaceae|g__Siphonobacter|s__Siphonobacter_unclassified	0	0	0	0	0	0	0	0	0	0	0	0	0	0	0	0	0	0	0	0	0	0	0	0	0	0	0	0	0	0	0	0	0	0	0	0	0	0	0	0.01308	0	0	0	0	0	0	0	0	0
d__Bacteria|p__Bacteroidota|c__Bacteroidia|o__Cytophagales|f__Hymenobacteraceae	0	0	0	0	0	0	0	0	0	0	0	0	0	0	0	0	0	0	0	0	0	0	0	0	0	0	0	0	0	0	0.00466	0	0	0	0	0	0	0	0	0	0	0	0	0	0	0	0	0	0
d__Bacteria|p__Bacteroidota|c__Bacteroidia|o__Cytophagales|f__Hymenobacteraceae|g__Hymenobacter	0	0	0	0	0	0	0	0	0	0	0	0	0	0	0	0	0	0	0	0	0	0	0	0	0	0	0	0	0	0	0	0	0	0	0	0	0	0	0	0	0	0	0	0	0	0	0	0	0
d__Bacteria|p__Bacteroidota|c__Bacteroidia|o__Cytophagales|f__Hymenobacteraceae|g__Hymenobacter|s__Hymenobacter_unclassified	0	0	0	0	0	0	0	0	0	0	0	0	0	0	0	0	0	0	0	0	0	0	0	0	0	0	0	0	0	0	0	0	0	0	0	0	0	0	0	0	0	0	0	0	0	0	0	0	0
d__Bacteria|p__Bacteroidota|c__Bacteroidia|o__Cytophagales|f__Hymenobacteraceae|g__Pontibacter	0	0	0	0	0	0	0	0	0	0	0	0	0	0	0	0	0	0	0	0	0	0	0	0	0	0	0	0	0	0	0.00466	0	0	0	0	0	0	0	0	0	0	0	0	0	0	0	0	0	0
d__Bacteria|p__Bacteroidota|c__Bacteroidia|o__Cytophagales|f__Hymenobacteraceae|g__Pontibacter|s__Pontibacter_unclassified	0	0	0	0	0	0	0	0	0	0	0	0	0	0	0	0	0	0	0	0	0	0	0	0	0	0	0	0	0	0	0.00466	0	0	0	0	0	0	0	0	0	0	0	0	0	0	0	0	0	0
d__Bacteria|p__Bacteroidota|c__Bacteroidia|o__Cytophagales|f__Hymenobacteraceae|g__Rufibacter	0	0	0	0	0	0	0	0	0	0	0	0	0	0	0	0	0	0	0	0	0	0	0	0	0	0	0	0	0	0	0	0	0	0	0	0	0	0	0	0	0	0	0	0	0	0	0	0	0
d__Bacteria|p__Bacteroidota|c__Bacteroidia|o__Cytophagales|f__Hymenobacteraceae|g__Rufibacter|s__Rufibacter_unclassified	0	0	0	0	0	0	0	0	0	0	0	0	0	0	0	0	0	0	0	0	0	0	0	0	0	0	0	0	0	0	0	0	0	0	0	0	0	0	0	0	0	0	0	0	0	0	0	0	0
d__Bacteria|p__Bacteroidota|c__Bacteroidia|o__Cytophagales|f__Microscillaceae	0	0	0	0	0	0	0	0	0	0	0	0	0	0	0	0	0	0	0	0	0	0	0	0	0	0	0	0	0	0	0	0	0	0	0	0	0	0	0	0	0	0	0	0	0	0	0	0	0
d__Bacteria|p__Bacteroidota|c__Bacteroidia|o__Cytophagales|f__Microscillaceae|g__Chryseolinea	0	0	0	0	0	0	0	0	0	0	0	0	0	0	0	0	0	0	0	0	0	0	0	0	0	0	0	0	0	0	0	0	0	0	0	0	0	0	0	0	0	0	0	0	0	0	0	0	0
d__Bacteria|p__Bacteroidota|c__Bacteroidia|o__Cytophagales|f__Microscillaceae|g__Chryseolinea|s__Chryseolinea_unclassified	0	0	0	0	0	0	0	0	0	0	0	0	0	0	0	0	0	0	0	0	0	0	0	0	0	0	0	0	0	0	0	0	0	0	0	0	0	0	0	0	0	0	0	0	0	0	0	0	0
d__Bacteria|p__Bacteroidota|c__Bacteroidia|o__Cytophagales|f__Microscillaceae|g__Microscillaceae_unclassified	0	0	0	0	0	0	0	0	0	0	0	0	0	0	0	0	0	0	0	0	0	0	0	0	0	0	0	0	0	0	0	0	0	0	0	0	0	0	0	0	0	0	0	0	0	0	0	0	0
d__Bacteria|p__Bacteroidota|c__Bacteroidia|o__Cytophagales|f__Microscillaceae|g__Microscillaceae_unclassified|s__Microscillaceae_unclassified	0	0	0	0	0	0	0	0	0	0	0	0	0	0	0	0	0	0	0	0	0	0	0	0	0	0	0	0	0	0	0	0	0	0	0	0	0	0	0	0	0	0	0	0	0	0	0	0	0
d__Bacteria|p__Bacteroidota|c__Bacteroidia|o__Cytophagales|f__Spirosomaceae	0	0	0	0	0	0	0	0	0	0	0	0	0	0	0	0	0	0	0	0	0.00338	0	0	0	0	0	0	0	0	0	0	0	0	0	0	0	0	0	0	0.02907	0	0	0	0	0	0	0	0	0
d__Bacteria|p__Bacteroidota|c__Bacteroidia|o__Cytophagales|f__Spirosomaceae|g__Dyadobacter	0	0	0	0	0	0	0	0	0	0	0	0	0	0	0	0	0	0	0	0	0.00338	0	0	0	0	0	0	0	0	0	0	0	0	0	0	0	0	0	0	0.02907	0	0	0	0	0	0	0	0	0
d__Bacteria|p__Bacteroidota|c__Bacteroidia|o__Cytophagales|f__Spirosomaceae|g__Dyadobacter|s__Dyadobacter_unclassified	0	0	0	0	0	0	0	0	0	0	0	0	0	0	0	0	0	0	0	0	0.00338	0	0	0	0	0	0	0	0	0	0	0	0	0	0	0	0	0	0	0.02907	0	0	0	0	0	0	0	0	0
d__Bacteria|p__Bacteroidota|c__Bacteroidia|o__Cytophagales|f__Spirosomaceae|g__Fibrisoma	0	0	0	0	0	0	0	0	0	0	0	0	0	0	0	0	0	0	0	0	0	0	0	0	0	0	0	0	0	0	0	0	0	0	0	0	0	0	0	0	0	0	0	0	0	0	0	0	0
d__Bacteria|p__Bacteroidota|c__Bacteroidia|o__Cytophagales|f__Spirosomaceae|g__Fibrisoma|s__Fibrisoma_unclassified	0	0	0	0	0	0	0	0	0	0	0	0	0	0	0	0	0	0	0	0	0	0	0	0	0	0	0	0	0	0	0	0	0	0	0	0	0	0	0	0	0	0	0	0	0	0	0	0	0
d__Bacteria|p__Bacteroidota|c__Bacteroidia|o__Flavobacteriales	0	0.28384	0	0	0	0	0.00653	0	0	0	0	0	0	0	0.18816	0.19484	0.053	0	0	0	0	0	0.07575	0.09014	0.04799	0.07047	0.52262	0.01776	0.02838	0.01016	0.02486	0.0042	0.05586	0.01076	0.06202	0.00742	0.00326	0.00313	0.25411	0.02907	0.03901	0.08401	0.09753	0.05903	0	0	0	0.62674	0
d__Bacteria|p__Bacteroidota|c__Bacteroidia|o__Flavobacteriales|f__Flavobacteriaceae	0	0.02838	0	0	0	0	0	0	0	0	0	0	0	0	0.17381	0.03216	0	0	0	0	0	0	0	0	0.00711	0.07047	0.08494	0	0	0	0	0	0.05267	0	0.05638	0	0	0	0.09594	0	0	0.04667	0.03363	0	0	0	0	0	0
d__Bacteria|p__Bacteroidota|c__Bacteroidia|o__Flavobacteriales|f__Flavobacteriaceae|g__Capnocytophaga	0	0	0	0	0	0	0	0	0	0	0	0	0	0	0.17381	0.03216	0	0	0	0	0	0	0	0	0.00711	0.07047	0.08494	0	0	0	0	0	0	0	0.05638	0	0	0	0.08038	0	0	0	0.03363	0	0	0	0	0	0
d__Bacteria|p__Bacteroidota|c__Bacteroidia|o__Flavobacteriales|f__Flavobacteriaceae|g__Capnocytophaga|s__Capnocytophaga_unclassified	0	0	0	0	0	0	0	0	0	0	0	0	0	0	0.17381	0.03216	0	0	0	0	0	0	0	0	0.00711	0.07047	0.08494	0	0	0	0	0	0	0	0.05638	0	0	0	0.08038	0	0	0	0.03363	0	0	0	0	0	0
d__Bacteria|p__Bacteroidota|c__Bacteroidia|o__Flavobacteriales|f__Flavobacteriaceae|g__Flavobacterium	0	0.02838	0	0	0	0	0	0	0	0	0	0	0	0	0	0	0	0	0	0	0	0	0	0	0	0	0	0	0	0	0	0	0	0	0	0	0	0	0	0	0	0.04667	0	0	0	0	0	0	0
d__Bacteria|p__Bacteroidota|c__Bacteroidia|o__Flavobacteriales|f__Flavobacteriaceae|g__Flavobacterium|s__Flavobacterium_unclassified	0	0.02838	0	0	0	0	0	0	0	0	0	0	0	0	0	0	0	0	0	0	0	0	0	0	0	0	0	0	0	0	0	0	0	0	0	0	0	0	0	0	0	0.04667	0	0	0	0	0	0	0
d__Bacteria|p__Bacteroidota|c__Bacteroidia|o__Flavobacteriales|f__Flavobacteriaceae|g__Myroides	0	0	0	0	0	0	0	0	0	0	0	0	0	0	0	0	0	0	0	0	0	0	0	0	0	0	0	0	0	0	0	0	0.05267	0	0	0	0	0	0	0	0	0	0	0	0	0	0	0	0
d__Bacteria|p__Bacteroidota|c__Bacteroidia|o__Flavobacteriales|f__Flavobacteriaceae|g__Myroides|s__Myroides_unclassified	0	0	0	0	0	0	0	0	0	0	0	0	0	0	0	0	0	0	0	0	0	0	0	0	0	0	0	0	0	0	0	0	0.05267	0	0	0	0	0	0	0	0	0	0	0	0	0	0	0	0
d__Bacteria|p__Bacteroidota|c__Bacteroidia|o__Flavobacteriales|f__Flavobacteriaceae|g__Salinimicrobium	0	0	0	0	0	0	0	0	0	0	0	0	0	0	0	0	0	0	0	0	0	0	0	0	0	0	0	0	0	0	0	0	0	0	0	0	0	0	0.01556	0	0	0	0	0	0	0	0	0	0
d__Bacteria|p__Bacteroidota|c__Bacteroidia|o__Flavobacteriales|f__Flavobacteriaceae|g__Salinimicrobium|s__Salinimicrobium_unclassified	0	0	0	0	0	0	0	0	0	0	0	0	0	0	0	0	0	0	0	0	0	0	0	0	0	0	0	0	0	0	0	0	0	0	0	0	0	0	0.01556	0	0	0	0	0	0	0	0	0	0
d__Bacteria|p__Bacteroidota|c__Bacteroidia|o__Flavobacteriales|f__Weeksellaceae	0	0.25546	0	0	0	0	0.00653	0	0	0	0	0	0	0	0.01435	0.16268	0.053	0	0	0	0	0	0.07575	0.09014	0.04088	0	0.43768	0.01776	0.02838	0.01016	0.02486	0.0042	0.00319	0.01076	0.00564	0.00742	0.00326	0.00313	0.15817	0.02907	0.03901	0.03734	0.0639	0.05903	0	0	0	0.62674	0
d__Bacteria|p__Bacteroidota|c__Bacteroidia|o__Flavobacteriales|f__Weeksellaceae|g__Bergeyella	0	0	0	0	0	0	0	0	0	0	0	0	0	0	0	0.03972	0	0	0	0	0	0	0.07575	0.09014	0.04088	0	0.43768	0	0.02838	0	0	0	0	0	0	0	0	0	0	0	0	0	0.02018	0.05635	0	0	0	0	0
d__Bacteria|p__Bacteroidota|c__Bacteroidia|o__Flavobacteriales|f__Weeksellaceae|g__Bergeyella|s__Bergeyella_unclassified	0	0	0	0	0	0	0	0	0	0	0	0	0	0	0	0.03972	0	0	0	0	0	0	0.07575	0.09014	0.04088	0	0.43768	0	0.02838	0	0	0	0	0	0	0	0	0	0	0	0	0	0.02018	0.05635	0	0	0	0	0
d__Bacteria|p__Bacteroidota|c__Bacteroidia|o__Flavobacteriales|f__Weeksellaceae|g__Chryseobacterium	0	0.25546	0	0	0	0	0	0	0	0	0	0	0	0	0	0.12296	0	0	0	0	0	0	0	0	0	0	0	0	0	0	0	0	0	0	0	0	0	0	0	0	0	0	0.02354	0	0	0	0	0	0
d__Bacteria|p__Bacteroidota|c__Bacteroidia|o__Flavobacteriales|f__Weeksellaceae|g__Chryseobacterium|s__Chryseobacterium_unclassified	0	0.25546	0	0	0	0	0	0	0	0	0	0	0	0	0	0.12296	0	0	0	0	0	0	0	0	0	0	0	0	0	0	0	0	0	0	0	0	0	0	0	0	0	0	0.02354	0	0	0	0	0	0
d__Bacteria|p__Bacteroidota|c__Bacteroidia|o__Flavobacteriales|f__Weeksellaceae|g__Cloacibacterium	0	0	0	0	0	0	0.00653	0	0	0	0	0	0	0	0.01435	0	0.053	0	0	0	0	0	0	0	0	0	0	0.01776	0	0.01016	0.02486	0.0042	0.00319	0.01076	0	0.00742	0.00326	0.00313	0.15817	0.02907	0.03901	0.03734	0.01177	0.00268	0	0	0	0.59085	0
d__Bacteria|p__Bacteroidota|c__Bacteroidia|o__Flavobacteriales|f__Weeksellaceae|g__Cloacibacterium|s__Cloacibacterium_unclassified	0	0	0	0	0	0	0.00653	0	0	0	0	0	0	0	0.01435	0	0.053	0	0	0	0	0	0	0	0	0	0	0.01776	0	0.01016	0.02486	0.0042	0.00319	0.01076	0	0.00742	0.00326	0.00313	0.15817	0.02907	0.03901	0.03734	0.01177	0.00268	0	0	0	0.59085	0
d__Bacteria|p__Bacteroidota|c__Bacteroidia|o__Flavobacteriales|f__Weeksellaceae|g__Moheibacter	0	0	0	0	0	0	0	0	0	0	0	0	0	0	0	0	0	0	0	0	0	0	0	0	0	0	0	0	0	0	0	0	0	0	0	0	0	0	0	0	0	0	0.00841	0	0	0	0	0	0
d__Bacteria|p__Bacteroidota|c__Bacteroidia|o__Flavobacteriales|f__Weeksellaceae|g__Moheibacter|s__Moheibacter_unclassified	0	0	0	0	0	0	0	0	0	0	0	0	0	0	0	0	0	0	0	0	0	0	0	0	0	0	0	0	0	0	0	0	0	0	0	0	0	0	0	0	0	0	0.00841	0	0	0	0	0	0
d__Bacteria|p__Bacteroidota|c__Bacteroidia|o__Flavobacteriales|f__Weeksellaceae|g__Weeksellaceae_unclassified	0	0	0	0	0	0	0	0	0	0	0	0	0	0	0	0	0	0	0	0	0	0	0	0	0	0	0	0	0	0	0	0	0	0	0.00564	0	0	0	0	0	0	0	0	0	0	0	0	0.03589	0
d__Bacteria|p__Bacteroidota|c__Bacteroidia|o__Flavobacteriales|f__Weeksellaceae|g__Weeksellaceae_unclassified|s__Weeksellaceae_unclassified	0	0	0	0	0	0	0	0	0	0	0	0	0	0	0	0	0	0	0	0	0	0	0	0	0	0	0	0	0	0	0	0	0	0	0.00564	0	0	0	0	0	0	0	0	0	0	0	0	0.03589	0
d__Bacteria|p__Bacteroidota|c__Bacteroidia|o__Sphingobacteriales	0	0.02838	0	0	0	0	0	0	0	0	0	0	0	0.03585	0	0	0	0	0	0	0.02363	0	0	0.01326	0	0	0	0	0	0	0	0	0	0	0	0.01236	0	0.00313	0	0.01453	0	0	0	0	0	0	0	0	0
d__Bacteria|p__Bacteroidota|c__Bacteroidia|o__Sphingobacteriales|f__AKYH767	0	0	0	0	0	0	0	0	0	0	0	0	0	0	0	0	0	0	0	0	0.02363	0	0	0	0	0	0	0	0	0	0	0	0	0	0	0	0	0	0	0	0	0	0	0	0	0	0	0	0
d__Bacteria|p__Bacteroidota|c__Bacteroidia|o__Sphingobacteriales|f__AKYH767|g__AKYH767_unclassified	0	0	0	0	0	0	0	0	0	0	0	0	0	0	0	0	0	0	0	0	0.02363	0	0	0	0	0	0	0	0	0	0	0	0	0	0	0	0	0	0	0	0	0	0	0	0	0	0	0	0
d__Bacteria|p__Bacteroidota|c__Bacteroidia|o__Sphingobacteriales|f__AKYH767|g__AKYH767_unclassified|s__AKYH767_unclassified	0	0	0	0	0	0	0	0	0	0	0	0	0	0	0	0	0	0	0	0	0.02363	0	0	0	0	0	0	0	0	0	0	0	0	0	0	0	0	0	0	0	0	0	0	0	0	0	0	0	0
d__Bacteria|p__Bacteroidota|c__Bacteroidia|o__Sphingobacteriales|f__Lentimicrobiaceae	0	0	0	0	0	0	0	0	0	0	0	0	0	0	0	0	0	0	0	0	0	0	0	0	0	0	0	0	0	0	0	0	0	0	0	0	0	0	0	0	0	0	0	0	0	0	0	0	0
d__Bacteria|p__Bacteroidota|c__Bacteroidia|o__Sphingobacteriales|f__Lentimicrobiaceae|g__Lentimicrobium	0	0	0	0	0	0	0	0	0	0	0	0	0	0	0	0	0	0	0	0	0	0	0	0	0	0	0	0	0	0	0	0	0	0	0	0	0	0	0	0	0	0	0	0	0	0	0	0	0
d__Bacteria|p__Bacteroidota|c__Bacteroidia|o__Sphingobacteriales|f__Lentimicrobiaceae|g__Lentimicrobium|s__Lentimicrobium_unclassified	0	0	0	0	0	0	0	0	0	0	0	0	0	0	0	0	0	0	0	0	0	0	0	0	0	0	0	0	0	0	0	0	0	0	0	0	0	0	0	0	0	0	0	0	0	0	0	0	0
d__Bacteria|p__Bacteroidota|c__Bacteroidia|o__Sphingobacteriales|f__Sphingobacteriaceae	0	0.02838	0	0	0	0	0	0	0	0	0	0	0	0.03585	0	0	0	0	0	0	0	0	0	0.01326	0	0	0	0	0	0	0	0	0	0	0	0.01236	0	0.00313	0	0.01453	0	0	0	0	0	0	0	0	0
d__Bacteria|p__Bacteroidota|c__Bacteroidia|o__Sphingobacteriales|f__Sphingobacteriaceae|g__Mucilaginibacter	0	0	0	0	0	0	0	0	0	0	0	0	0	0	0	0	0	0	0	0	0	0	0	0	0	0	0	0	0	0	0	0	0	0	0	0	0	0	0	0.01453	0	0	0	0	0	0	0	0	0
d__Bacteria|p__Bacteroidota|c__Bacteroidia|o__Sphingobacteriales|f__Sphingobacteriaceae|g__Mucilaginibacter|s__Mucilaginibacter_unclassified	0	0	0	0	0	0	0	0	0	0	0	0	0	0	0	0	0	0	0	0	0	0	0	0	0	0	0	0	0	0	0	0	0	0	0	0	0	0	0	0.01453	0	0	0	0	0	0	0	0	0
d__Bacteria|p__Bacteroidota|c__Bacteroidia|o__Sphingobacteriales|f__Sphingobacteriaceae|g__Nubsella	0	0.02838	0	0	0	0	0	0	0	0	0	0	0	0	0	0	0	0	0	0	0	0	0	0	0	0	0	0	0	0	0	0	0	0	0	0	0	0	0	0	0	0	0	0	0	0	0	0	0
d__Bacteria|p__Bacteroidota|c__Bacteroidia|o__Sphingobacteriales|f__Sphingobacteriaceae|g__Nubsella|s__Nubsella_unclassified	0	0.02838	0	0	0	0	0	0	0	0	0	0	0	0	0	0	0	0	0	0	0	0	0	0	0	0	0	0	0	0	0	0	0	0	0	0	0	0	0	0	0	0	0	0	0	0	0	0	0
d__Bacteria|p__Bacteroidota|c__Bacteroidia|o__Sphingobacteriales|f__Sphingobacteriaceae|g__Pedobacter	0	0	0	0	0	0	0	0	0	0	0	0	0	0.03585	0	0	0	0	0	0	0	0	0	0	0	0	0	0	0	0	0	0	0	0	0	0	0	0	0	0	0	0	0	0	0	0	0	0	0
d__Bacteria|p__Bacteroidota|c__Bacteroidia|o__Sphingobacteriales|f__Sphingobacteriaceae|g__Pedobacter|s__Pedobacter_unclassified	0	0	0	0	0	0	0	0	0	0	0	0	0	0.03585	0	0	0	0	0	0	0	0	0	0	0	0	0	0	0	0	0	0	0	0	0	0	0	0	0	0	0	0	0	0	0	0	0	0	0
d__Bacteria|p__Bacteroidota|c__Bacteroidia|o__Sphingobacteriales|f__Sphingobacteriaceae|g__Solitalea	0	0	0	0	0	0	0	0	0	0	0	0	0	0	0	0	0	0	0	0	0	0	0	0	0	0	0	0	0	0	0	0	0	0	0	0	0	0	0	0	0	0	0	0	0	0	0	0	0
d__Bacteria|p__Bacteroidota|c__Bacteroidia|o__Sphingobacteriales|f__Sphingobacteriaceae|g__Solitalea|s__Solitalea_unclassified	0	0	0	0	0	0	0	0	0	0	0	0	0	0	0	0	0	0	0	0	0	0	0	0	0	0	0	0	0	0	0	0	0	0	0	0	0	0	0	0	0	0	0	0	0	0	0	0	0
d__Bacteria|p__Bacteroidota|c__Bacteroidia|o__Sphingobacteriales|f__Sphingobacteriaceae|g__Sphingobacterium	0	0	0	0	0	0	0	0	0	0	0	0	0	0	0	0	0	0	0	0	0	0	0	0.01326	0	0	0	0	0	0	0	0	0	0	0	0.01236	0	0.00313	0	0	0	0	0	0	0	0	0	0	0
d__Bacteria|p__Bacteroidota|c__Bacteroidia|o__Sphingobacteriales|f__Sphingobacteriaceae|g__Sphingobacterium|s__Sphingobacterium_unclassified	0	0	0	0	0	0	0	0	0	0	0	0	0	0	0	0	0	0	0	0	0	0	0	0.01326	0	0	0	0	0	0	0	0	0	0	0	0.01236	0	0.00313	0	0	0	0	0	0	0	0	0	0	0
d__Bacteria|p__Bacteroidota|c__Bacteroidota_unclassified	0	0	0	0	0.02658	0	0	0	0	0.0257	0.15014	0.09621	0.06089	0.15337	0	0	0.00723	0.00878	0.01375	0.10566	0.01688	0.02689	0.06313	0.01856	0	0	0	0.00888	0	0.00435	0	0	0	0	0	0	0.02442	0.0047	0	0	0	0.01867	0	0.00403	0.01525	0	0	0.00828	0
d__Bacteria|p__Bacteroidota|c__Bacteroidota_unclassified|o__Bacteroidota_unclassified	0	0	0	0	0.02658	0	0	0	0	0.0257	0.15014	0.09621	0.06089	0.15337	0	0	0.00723	0.00878	0.01375	0.10566	0.01688	0.02689	0.06313	0.01856	0	0	0	0.00888	0	0.00435	0	0	0	0	0	0	0.02442	0.0047	0	0	0	0.01867	0	0.00403	0.01525	0	0	0.00828	0
d__Bacteria|p__Bacteroidota|c__Bacteroidota_unclassified|o__Bacteroidota_unclassified|f__Bacteroidota_unclassified	0	0	0	0	0.02658	0	0	0	0	0.0257	0.15014	0.09621	0.06089	0.15337	0	0	0.00723	0.00878	0.01375	0.10566	0.01688	0.02689	0.06313	0.01856	0	0	0	0.00888	0	0.00435	0	0	0	0	0	0	0.02442	0.0047	0	0	0	0.01867	0	0.00403	0.01525	0	0	0.00828	0
d__Bacteria|p__Bacteroidota|c__Bacteroidota_unclassified|o__Bacteroidota_unclassified|f__Bacteroidota_unclassified|g__Bacteroidota_unclassified	0	0	0	0	0.02658	0	0	0	0	0.0257	0.15014	0.09621	0.06089	0.15337	0	0	0.00723	0.00878	0.01375	0.10566	0.01688	0.02689	0.06313	0.01856	0	0	0	0.00888	0	0.00435	0	0	0	0	0	0	0.02442	0.0047	0	0	0	0.01867	0	0.00403	0.01525	0	0	0.00828	0
d__Bacteria|p__Bacteroidota|c__Bacteroidota_unclassified|o__Bacteroidota_unclassified|f__Bacteroidota_unclassified|g__Bacteroidota_unclassified|s__Bacteroidota_unclassified	0	0	0	0	0.02658	0	0	0	0	0.0257	0.15014	0.09621	0.06089	0.15337	0	0	0.00723	0.00878	0.01375	0.10566	0.01688	0.02689	0.06313	0.01856	0	0	0	0.00888	0	0.00435	0	0	0	0	0	0	0.02442	0.0047	0	0	0	0.01867	0	0.00403	0.01525	0	0	0.00828	0
d__Bacteria|p__Bacteroidota|c__Chitinophagia	0	0	0	0	0	0	0	0	0	0	0	0	0	0	0	0	0	0	0	0	0.01181	0	0	0	0	0	0	0	0	0	0	0	0	0	0	0	0	0	0	0	0	0	0	0	0	0	0	0	0
d__Bacteria|p__Bacteroidota|c__Chitinophagia|o__Chitinophagales	0	0	0	0	0	0	0	0	0	0	0	0	0	0	0	0	0	0	0	0	0.01181	0	0	0	0	0	0	0	0	0	0	0	0	0	0	0	0	0	0	0	0	0	0	0	0	0	0	0	0
d__Bacteria|p__Bacteroidota|c__Chitinophagia|o__Chitinophagales|f__Chitinophagaceae	0	0	0	0	0	0	0	0	0	0	0	0	0	0	0	0	0	0	0	0	0.01181	0	0	0	0	0	0	0	0	0	0	0	0	0	0	0	0	0	0	0	0	0	0	0	0	0	0	0	0
d__Bacteria|p__Bacteroidota|c__Chitinophagia|o__Chitinophagales|f__Chitinophagaceae|g__Chitinophaga	0	0	0	0	0	0	0	0	0	0	0	0	0	0	0	0	0	0	0	0	0.01181	0	0	0	0	0	0	0	0	0	0	0	0	0	0	0	0	0	0	0	0	0	0	0	0	0	0	0	0
d__Bacteria|p__Bacteroidota|c__Chitinophagia|o__Chitinophagales|f__Chitinophagaceae|g__Chitinophaga|s__Chitinophaga_pinensis	0	0	0	0	0	0	0	0	0	0	0	0	0	0	0	0	0	0	0	0	0.01181	0	0	0	0	0	0	0	0	0	0	0	0	0	0	0	0	0	0	0	0	0	0	0	0	0	0	0	0
d__Bacteria|p__Bacteroidota|c__Cytophagia	0	0	0	0	0	0	0	0	0	0	0	0	0	0	0	0	0	0	0	0	0.0135	0	0	0	0	0	0	0	0	0	0	0	0	0	0	0	0	0	0	0	0	0	0	0	0	0	0	0	0
d__Bacteria|p__Bacteroidota|c__Cytophagia|o__Cytophagales	0	0	0	0	0	0	0	0	0	0	0	0	0	0	0	0	0	0	0	0	0.0135	0	0	0	0	0	0	0	0	0	0	0	0	0	0	0	0	0	0	0	0	0	0	0	0	0	0	0	0
d__Bacteria|p__Bacteroidota|c__Cytophagia|o__Cytophagales|f__Cytophagaceae	0	0	0	0	0	0	0	0	0	0	0	0	0	0	0	0	0	0	0	0	0.0135	0	0	0	0	0	0	0	0	0	0	0	0	0	0	0	0	0	0	0	0	0	0	0	0	0	0	0	0
d__Bacteria|p__Bacteroidota|c__Cytophagia|o__Cytophagales|f__Cytophagaceae|g__Ohtaekwangia	0	0	0	0	0	0	0	0	0	0	0	0	0	0	0	0	0	0	0	0	0.0135	0	0	0	0	0	0	0	0	0	0	0	0	0	0	0	0	0	0	0	0	0	0	0	0	0	0	0	0
d__Bacteria|p__Bacteroidota|c__Cytophagia|o__Cytophagales|f__Cytophagaceae|g__Ohtaekwangia|s__uncultured_Ohtaekwangia_sp.	0	0	0	0	0	0	0	0	0	0	0	0	0	0	0	0	0	0	0	0	0.0135	0	0	0	0	0	0	0	0	0	0	0	0	0	0	0	0	0	0	0	0	0	0	0	0	0	0	0	0
d__Bacteria|p__Bacteroidota|c__Flavobacteriia	0	0	0	0	0	0	0	0	0	0	0	0	0	0	0	0	0	0	0	0	0	0	0	0.0106	0	0	0	0	0	0	0	0	0	0	0	0	0	0	0	0	0	0	0.02018	0	0	0.02182	0	0	0
d__Bacteria|p__Bacteroidota|c__Flavobacteriia|o__Flavobacteriales	0	0	0	0	0	0	0	0	0	0	0	0	0	0	0	0	0	0	0	0	0	0	0	0.0106	0	0	0	0	0	0	0	0	0	0	0	0	0	0	0	0	0	0	0.02018	0	0	0	0	0	0
d__Bacteria|p__Bacteroidota|c__Flavobacteriia|o__Flavobacteriales|f__Flavobacteriaceae	0	0	0	0	0	0	0	0	0	0	0	0	0	0	0	0	0	0	0	0	0	0	0	0.0106	0	0	0	0	0	0	0	0	0	0	0	0	0	0	0	0	0	0	0	0	0	0	0	0	0
d__Bacteria|p__Bacteroidota|c__Flavobacteriia|o__Flavobacteriales|f__Flavobacteriaceae|g__Flavobacteriaceae_unclassified	0	0	0	0	0	0	0	0	0	0	0	0	0	0	0	0	0	0	0	0	0	0	0	0.0106	0	0	0	0	0	0	0	0	0	0	0	0	0	0	0	0	0	0	0	0	0	0	0	0	0
d__Bacteria|p__Bacteroidota|c__Flavobacteriia|o__Flavobacteriales|f__Flavobacteriaceae|g__Flavobacteriaceae_unclassified|s__Flavobacteriaceae_unclassified	0	0	0	0	0	0	0	0	0	0	0	0	0	0	0	0	0	0	0	0	0	0	0	0.0106	0	0	0	0	0	0	0	0	0	0	0	0	0	0	0	0	0	0	0	0	0	0	0	0	0
d__Bacteria|p__Bacteroidota|c__Flavobacteriia|o__Flavobacteriales|f__Flavobacteriales_unclassified	0	0	0	0	0	0	0	0	0	0	0	0	0	0	0	0	0	0	0	0	0	0	0	0	0	0	0	0	0	0	0	0	0	0	0	0	0	0	0	0	0	0	0.02018	0	0	0	0	0	0
d__Bacteria|p__Bacteroidota|c__Flavobacteriia|o__Flavobacteriales|f__Flavobacteriales_unclassified|g__Flavobacteriales_unclassified	0	0	0	0	0	0	0	0	0	0	0	0	0	0	0	0	0	0	0	0	0	0	0	0	0	0	0	0	0	0	0	0	0	0	0	0	0	0	0	0	0	0	0.02018	0	0	0	0	0	0
d__Bacteria|p__Bacteroidota|c__Flavobacteriia|o__Flavobacteriales|f__Flavobacteriales_unclassified|g__Flavobacteriales_unclassified|s__Flavobacteriales_unclassified	0	0	0	0	0	0	0	0	0	0	0	0	0	0	0	0	0	0	0	0	0	0	0	0	0	0	0	0	0	0	0	0	0	0	0	0	0	0	0	0	0	0	0.02018	0	0	0	0	0	0
d__Bacteria|p__Bacteroidota|c__Flavobacteriia|o__Flavobacteriia_unclassified	0	0	0	0	0	0	0	0	0	0	0	0	0	0	0	0	0	0	0	0	0	0	0	0	0	0	0	0	0	0	0	0	0	0	0	0	0	0	0	0	0	0	0	0	0	0.02182	0	0	0
d__Bacteria|p__Bacteroidota|c__Flavobacteriia|o__Flavobacteriia_unclassified|f__Flavobacteriia_unclassified	0	0	0	0	0	0	0	0	0	0	0	0	0	0	0	0	0	0	0	0	0	0	0	0	0	0	0	0	0	0	0	0	0	0	0	0	0	0	0	0	0	0	0	0	0	0.02182	0	0	0
d__Bacteria|p__Bacteroidota|c__Flavobacteriia|o__Flavobacteriia_unclassified|f__Flavobacteriia_unclassified|g__Flavobacteriia_unclassified	0	0	0	0	0	0	0	0	0	0	0	0	0	0	0	0	0	0	0	0	0	0	0	0	0	0	0	0	0	0	0	0	0	0	0	0	0	0	0	0	0	0	0	0	0	0.02182	0	0	0
d__Bacteria|p__Bacteroidota|c__Flavobacteriia|o__Flavobacteriia_unclassified|f__Flavobacteriia_unclassified|g__Flavobacteriia_unclassified|s__Flavobacteriia_unclassified	0	0	0	0	0	0	0	0	0	0	0	0	0	0	0	0	0	0	0	0	0	0	0	0	0	0	0	0	0	0	0	0	0	0	0	0	0	0	0	0	0	0	0	0	0	0.02182	0	0	0
d__Bacteria|p__Bacteroidota|c__Ignavibacteria	0	0	0	0	0	0	0	0	0	0	0	0	0	0	0	0	0	0	0	0	0.03206	0	0	0	0	0	0	0	0	0	0	0	0	0	0	0	0.04883	0	0	0	0	0	0	0	0	0	0	0	0
d__Bacteria|p__Bacteroidota|c__Ignavibacteria|o__Ignavibacteriales	0	0	0	0	0	0	0	0	0	0	0	0	0	0	0	0	0	0	0	0	0.03206	0	0	0	0	0	0	0	0	0	0	0	0	0	0	0	0.04883	0	0	0	0	0	0	0	0	0	0	0	0
d__Bacteria|p__Bacteroidota|c__Ignavibacteria|o__Ignavibacteriales|f__BSV40	0	0	0	0	0	0	0	0	0	0	0	0	0	0	0	0	0	0	0	0	0.03206	0	0	0	0	0	0	0	0	0	0	0	0	0	0	0	0	0	0	0	0	0	0	0	0	0	0	0	0
d__Bacteria|p__Bacteroidota|c__Ignavibacteria|o__Ignavibacteriales|f__BSV40|g__BSV40_unclassified	0	0	0	0	0	0	0	0	0	0	0	0	0	0	0	0	0	0	0	0	0.03206	0	0	0	0	0	0	0	0	0	0	0	0	0	0	0	0	0	0	0	0	0	0	0	0	0	0	0	0
d__Bacteria|p__Bacteroidota|c__Ignavibacteria|o__Ignavibacteriales|f__BSV40|g__BSV40_unclassified|s__BSV40_unclassified	0	0	0	0	0	0	0	0	0	0	0	0	0	0	0	0	0	0	0	0	0.03206	0	0	0	0	0	0	0	0	0	0	0	0	0	0	0	0	0	0	0	0	0	0	0	0	0	0	0	0
d__Bacteria|p__Bacteroidota|c__Ignavibacteria|o__Ignavibacteriales|f__PHOS-HE36	0	0	0	0	0	0	0	0	0	0	0	0	0	0	0	0	0	0	0	0	0	0	0	0	0	0	0	0	0	0	0	0	0	0	0	0	0.04883	0	0	0	0	0	0	0	0	0	0	0	0
d__Bacteria|p__Bacteroidota|c__Ignavibacteria|o__Ignavibacteriales|f__PHOS-HE36|g__PHOS-HE36_unclassified	0	0	0	0	0	0	0	0	0	0	0	0	0	0	0	0	0	0	0	0	0	0	0	0	0	0	0	0	0	0	0	0	0	0	0	0	0.04883	0	0	0	0	0	0	0	0	0	0	0	0
d__Bacteria|p__Bacteroidota|c__Ignavibacteria|o__Ignavibacteriales|f__PHOS-HE36|g__PHOS-HE36_unclassified|s__PHOS-HE36_unclassified	0	0	0	0	0	0	0	0	0	0	0	0	0	0	0	0	0	0	0	0	0	0	0	0	0	0	0	0	0	0	0	0	0	0	0	0	0.04883	0	0	0	0	0	0	0	0	0	0	0	0
d__Bacteria|p__Bacteroidota|c__Kapabacteria	0	0	0	0	0	0	0	0	0	0	0	0	0	0	0	0	0	0	0	0	0	0	0	0	0	0	0	0	0	0	0	0	0	0	0	0	0	0	0	0	0	0	0	0	0	0	0	0	0
d__Bacteria|p__Bacteroidota|c__Kapabacteria|o__Kapabacteriales	0	0	0	0	0	0	0	0	0	0	0	0	0	0	0	0	0	0	0	0	0	0	0	0	0	0	0	0	0	0	0	0	0	0	0	0	0	0	0	0	0	0	0	0	0	0	0	0	0
d__Bacteria|p__Bacteroidota|c__Kapabacteria|o__Kapabacteriales|f__Kapabacteriales_unclassified	0	0	0	0	0	0	0	0	0	0	0	0	0	0	0	0	0	0	0	0	0	0	0	0	0	0	0	0	0	0	0	0	0	0	0	0	0	0	0	0	0	0	0	0	0	0	0	0	0
d__Bacteria|p__Bacteroidota|c__Kapabacteria|o__Kapabacteriales|f__Kapabacteriales_unclassified|g__Kapabacteriales_unclassified	0	0	0	0	0	0	0	0	0	0	0	0	0	0	0	0	0	0	0	0	0	0	0	0	0	0	0	0	0	0	0	0	0	0	0	0	0	0	0	0	0	0	0	0	0	0	0	0	0
d__Bacteria|p__Bacteroidota|c__Kapabacteria|o__Kapabacteriales|f__Kapabacteriales_unclassified|g__Kapabacteriales_unclassified|s__Kapabacteriales_unclassified	0	0	0	0	0	0	0	0	0	0	0	0	0	0	0	0	0	0	0	0	0	0	0	0	0	0	0	0	0	0	0	0	0	0	0	0	0	0	0	0	0	0	0	0	0	0	0	0	0
d__Bacteria|p__Bacteroidota|c__Kryptonia	0	0	0	0	0	0	0	0	0	0	0	0	0	0	0	0	0	0	0	0	0	0	0	0	0	0	0	0	0	0	1.56799	0	0	0	0	0	0	0	0	0	0	0	0	0	0	0	0	0	0
d__Bacteria|p__Bacteroidota|c__Kryptonia|o__Kryptoniales	0	0	0	0	0	0	0	0	0	0	0	0	0	0	0	0	0	0	0	0	0	0	0	0	0	0	0	0	0	0	1.56799	0	0	0	0	0	0	0	0	0	0	0	0	0	0	0	0	0	0
d__Bacteria|p__Bacteroidota|c__Kryptonia|o__Kryptoniales|f__BSV26	0	0	0	0	0	0	0	0	0	0	0	0	0	0	0	0	0	0	0	0	0	0	0	0	0	0	0	0	0	0	1.56799	0	0	0	0	0	0	0	0	0	0	0	0	0	0	0	0	0	0
d__Bacteria|p__Bacteroidota|c__Kryptonia|o__Kryptoniales|f__BSV26|g__BSV26_unclassified	0	0	0	0	0	0	0	0	0	0	0	0	0	0	0	0	0	0	0	0	0	0	0	0	0	0	0	0	0	0	1.56799	0	0	0	0	0	0	0	0	0	0	0	0	0	0	0	0	0	0
d__Bacteria|p__Bacteroidota|c__Kryptonia|o__Kryptoniales|f__BSV26|g__BSV26_unclassified|s__BSV26_unclassified	0	0	0	0	0	0	0	0	0	0	0	0	0	0	0	0	0	0	0	0	0	0	0	0	0	0	0	0	0	0	1.56799	0	0	0	0	0	0	0	0	0	0	0	0	0	0	0	0	0	0
d__Bacteria|p__Bacteroidota|c__Rhodothermia	0	0	0	0	0	0	0	0	0	0	0	0	0	0	0	0	0	0	0	0	0	0	0	0	0	0	0	0	0	0	0	0	0	0	0	0	0	0	0	0	0	0.01867	0	0	0	0	0	0.14909	0
d__Bacteria|p__Bacteroidota|c__Rhodothermia|o__Rhodothermales	0	0	0	0	0	0	0	0	0	0	0	0	0	0	0	0	0	0	0	0	0	0	0	0	0	0	0	0	0	0	0	0	0	0	0	0	0	0	0	0	0	0.01867	0	0	0	0	0	0.14909	0
d__Bacteria|p__Bacteroidota|c__Rhodothermia|o__Rhodothermales|f__Rhodothermaceae	0	0	0	0	0	0	0	0	0	0	0	0	0	0	0	0	0	0	0	0	0	0	0	0	0	0	0	0	0	0	0	0	0	0	0	0	0	0	0	0	0	0.01867	0	0	0	0	0	0.14909	0
d__Bacteria|p__Bacteroidota|c__Rhodothermia|o__Rhodothermales|f__Rhodothermaceae|g__Rhodothermaceae_unclassified	0	0	0	0	0	0	0	0	0	0	0	0	0	0	0	0	0	0	0	0	0	0	0	0	0	0	0	0	0	0	0	0	0	0	0	0	0	0	0	0	0	0	0	0	0	0	0	0.14909	0
d__Bacteria|p__Bacteroidota|c__Rhodothermia|o__Rhodothermales|f__Rhodothermaceae|g__Rhodothermaceae_unclassified|s__Rhodothermaceae_unclassified	0	0	0	0	0	0	0	0	0	0	0	0	0	0	0	0	0	0	0	0	0	0	0	0	0	0	0	0	0	0	0	0	0	0	0	0	0	0	0	0	0	0	0	0	0	0	0	0.14909	0
d__Bacteria|p__Bacteroidota|c__Rhodothermia|o__Rhodothermales|f__Rhodothermaceae|g__Rubrivirga	0	0	0	0	0	0	0	0	0	0	0	0	0	0	0	0	0	0	0	0	0	0	0	0	0	0	0	0	0	0	0	0	0	0	0	0	0	0	0	0	0	0.01867	0	0	0	0	0	0	0
d__Bacteria|p__Bacteroidota|c__Rhodothermia|o__Rhodothermales|f__Rhodothermaceae|g__Rubrivirga|s__Rubrivirga_unclassified	0	0	0	0	0	0	0	0	0	0	0	0	0	0	0	0	0	0	0	0	0	0	0	0	0	0	0	0	0	0	0	0	0	0	0	0	0	0	0	0	0	0.01867	0	0	0	0	0	0	0
d__Bacteria|p__Bacteroidota|c__Sphingobacteriia	0	0	0	0	0	0	0	0	0	0	0	0	0	0	0	0	0	0	0	0	0	0	0	0	0.01422	0	0	0	0	0	0	0	0	0	0	0	0	0	0	0	0	0	0	0	0	0	0	0	0
d__Bacteria|p__Bacteroidota|c__Sphingobacteriia|o__Sphingobacteriales	0	0	0	0	0	0	0	0	0	0	0	0	0	0	0	0	0	0	0	0	0	0	0	0	0.01422	0	0	0	0	0	0	0	0	0	0	0	0	0	0	0	0	0	0	0	0	0	0	0	0
d__Bacteria|p__Bacteroidota|c__Sphingobacteriia|o__Sphingobacteriales|f__Sphingobacteriales_unclassified	0	0	0	0	0	0	0	0	0	0	0	0	0	0	0	0	0	0	0	0	0	0	0	0	0.01422	0	0	0	0	0	0	0	0	0	0	0	0	0	0	0	0	0	0	0	0	0	0	0	0
d__Bacteria|p__Bacteroidota|c__Sphingobacteriia|o__Sphingobacteriales|f__Sphingobacteriales_unclassified|g__Sphingobacteriales_unclassified	0	0	0	0	0	0	0	0	0	0	0	0	0	0	0	0	0	0	0	0	0	0	0	0	0.01422	0	0	0	0	0	0	0	0	0	0	0	0	0	0	0	0	0	0	0	0	0	0	0	0
d__Bacteria|p__Bacteroidota|c__Sphingobacteriia|o__Sphingobacteriales|f__Sphingobacteriales_unclassified|g__Sphingobacteriales_unclassified|s__Sphingobacteriales_unclassified	0	0	0	0	0	0	0	0	0	0	0	0	0	0	0	0	0	0	0	0	0	0	0	0	0.01422	0	0	0	0	0	0	0	0	0	0	0	0	0	0	0	0	0	0	0	0	0	0	0	0
d__Bacteria|p__Bdellovibrionota	0	0	0.00568	0	0	0	0	0	0	0	0	0	0	0	0	0	0	0	0	0	0	0	0	0	0	0	0	0	0	0	0	0	0	0.00269	0	0	0	0	0	0	0	0	0	0	0	0	0	0	0
d__Bacteria|p__Bdellovibrionota|c__Bdellovibrionia	0	0	0	0	0	0	0	0	0	0	0	0	0	0	0	0	0	0	0	0	0	0	0	0	0	0	0	0	0	0	0	0	0	0.00269	0	0	0	0	0	0	0	0	0	0	0	0	0	0	0
d__Bacteria|p__Bdellovibrionota|c__Bdellovibrionia|o__Bacteriovoracales	0	0	0	0	0	0	0	0	0	0	0	0	0	0	0	0	0	0	0	0	0	0	0	0	0	0	0	0	0	0	0	0	0	0	0	0	0	0	0	0	0	0	0	0	0	0	0	0	0
d__Bacteria|p__Bdellovibrionota|c__Bdellovibrionia|o__Bacteriovoracales|f__Bacteriovoracaceae	0	0	0	0	0	0	0	0	0	0	0	0	0	0	0	0	0	0	0	0	0	0	0	0	0	0	0	0	0	0	0	0	0	0	0	0	0	0	0	0	0	0	0	0	0	0	0	0	0
d__Bacteria|p__Bdellovibrionota|c__Bdellovibrionia|o__Bacteriovoracales|f__Bacteriovoracaceae|g__Peredibacter	0	0	0	0	0	0	0	0	0	0	0	0	0	0	0	0	0	0	0	0	0	0	0	0	0	0	0	0	0	0	0	0	0	0	0	0	0	0	0	0	0	0	0	0	0	0	0	0	0
d__Bacteria|p__Bdellovibrionota|c__Bdellovibrionia|o__Bacteriovoracales|f__Bacteriovoracaceae|g__Peredibacter|s__Peredibacter_unclassified	0	0	0	0	0	0	0	0	0	0	0	0	0	0	0	0	0	0	0	0	0	0	0	0	0	0	0	0	0	0	0	0	0	0	0	0	0	0	0	0	0	0	0	0	0	0	0	0	0
d__Bacteria|p__Bdellovibrionota|c__Bdellovibrionia|o__Bdellovibrionales	0	0	0	0	0	0	0	0	0	0	0	0	0	0	0	0	0	0	0	0	0	0	0	0	0	0	0	0	0	0	0	0	0	0.00269	0	0	0	0	0	0	0	0	0	0	0	0	0	0	0
d__Bacteria|p__Bdellovibrionota|c__Bdellovibrionia|o__Bdellovibrionales|f__Bdellovibrionaceae	0	0	0	0	0	0	0	0	0	0	0	0	0	0	0	0	0	0	0	0	0	0	0	0	0	0	0	0	0	0	0	0	0	0.00269	0	0	0	0	0	0	0	0	0	0	0	0	0	0	0
d__Bacteria|p__Bdellovibrionota|c__Bdellovibrionia|o__Bdellovibrionales|f__Bdellovibrionaceae|g__Bdellovibrio	0	0	0	0	0	0	0	0	0	0	0	0	0	0	0	0	0	0	0	0	0	0	0	0	0	0	0	0	0	0	0	0	0	0	0	0	0	0	0	0	0	0	0	0	0	0	0	0	0
d__Bacteria|p__Bdellovibrionota|c__Bdellovibrionia|o__Bdellovibrionales|f__Bdellovibrionaceae|g__Bdellovibrio|s__Bdellovibrio_unclassified	0	0	0	0	0	0	0	0	0	0	0	0	0	0	0	0	0	0	0	0	0	0	0	0	0	0	0	0	0	0	0	0	0	0	0	0	0	0	0	0	0	0	0	0	0	0	0	0	0
d__Bacteria|p__Bdellovibrionota|c__Bdellovibrionia|o__Bdellovibrionales|f__Bdellovibrionaceae|g__OM27_clade	0	0	0	0	0	0	0	0	0	0	0	0	0	0	0	0	0	0	0	0	0	0	0	0	0	0	0	0	0	0	0	0	0	0.00269	0	0	0	0	0	0	0	0	0	0	0	0	0	0	0
d__Bacteria|p__Bdellovibrionota|c__Bdellovibrionia|o__Bdellovibrionales|f__Bdellovibrionaceae|g__OM27_clade|s__OM27_clade_unclassified	0	0	0	0	0	0	0	0	0	0	0	0	0	0	0	0	0	0	0	0	0	0	0	0	0	0	0	0	0	0	0	0	0	0.00269	0	0	0	0	0	0	0	0	0	0	0	0	0	0	0
d__Bacteria|p__Bdellovibrionota|c__Oligoflexia	0	0	0.00568	0	0	0	0	0	0	0	0	0	0	0	0	0	0	0	0	0	0	0	0	0	0	0	0	0	0	0	0	0	0	0	0	0	0	0	0	0	0	0	0	0	0	0	0	0	0
d__Bacteria|p__Bdellovibrionota|c__Oligoflexia|o__0319-6G20	0	0	0.00568	0	0	0	0	0	0	0	0	0	0	0	0	0	0	0	0	0	0	0	0	0	0	0	0	0	0	0	0	0	0	0	0	0	0	0	0	0	0	0	0	0	0	0	0	0	0
d__Bacteria|p__Bdellovibrionota|c__Oligoflexia|o__0319-6G20|f__0319-6G20_unclassified	0	0	0.00568	0	0	0	0	0	0	0	0	0	0	0	0	0	0	0	0	0	0	0	0	0	0	0	0	0	0	0	0	0	0	0	0	0	0	0	0	0	0	0	0	0	0	0	0	0	0
d__Bacteria|p__Bdellovibrionota|c__Oligoflexia|o__0319-6G20|f__0319-6G20_unclassified|g__0319-6G20_unclassified	0	0	0.00568	0	0	0	0	0	0	0	0	0	0	0	0	0	0	0	0	0	0	0	0	0	0	0	0	0	0	0	0	0	0	0	0	0	0	0	0	0	0	0	0	0	0	0	0	0	0
d__Bacteria|p__Bdellovibrionota|c__Oligoflexia|o__0319-6G20|f__0319-6G20_unclassified|g__0319-6G20_unclassified|s__0319-6G20_unclassified	0	0	0.00568	0	0	0	0	0	0	0	0	0	0	0	0	0	0	0	0	0	0	0	0	0	0	0	0	0	0	0	0	0	0	0	0	0	0	0	0	0	0	0	0	0	0	0	0	0	0
d__Bacteria|p__Campylobacterota	0.08998	0	0.02555	0.24322	0.00886	0.00918	0.05386	0.03174	0	0	0.02887	0.01539	0.01218	0.03187	0.27428	0.09268	0.00482	0.02194	0.04467	0.00991	0.02532	0.03865	0.27144	0.13787	0.01066	0.12081	0.23468	0.01243	0	0.01016	0.05283	3.12658	0.01117	0	0.01551	0.27437	0.02116	0	0.17373	0	0	0.02334	0.09752	0.07379	0.16993	0.10755	0.09642	0.00828	0.14184
d__Bacteria|p__Campylobacterota|c__Campylobacteria	0.08998	0	0.02555	0.24322	0.00886	0.00918	0.05386	0.03174	0	0	0.02887	0.01539	0.01218	0.03187	0.27428	0.09268	0.00482	0.02194	0.04467	0.00991	0.02532	0.03865	0.27144	0.13787	0.01066	0.12081	0.23468	0.01243	0	0.01016	0.05283	3.12658	0.01117	0	0.01551	0.27437	0.02116	0	0.17373	0	0	0.02334	0.09752	0.07379	0.16993	0.10755	0.09642	0.00828	0.14184
d__Bacteria|p__Campylobacterota|c__Campylobacteria|o__Campylobacterales	0.08998	0	0.02555	0.24322	0.00886	0.00918	0.05386	0.03174	0	0	0.02887	0.01539	0.01218	0.03187	0.27428	0.09268	0.00482	0.02194	0.04467	0.00991	0.02532	0.03865	0.27144	0.13787	0.01066	0.12081	0.23468	0.01243	0	0.01016	0.05283	3.12658	0.01117	0	0.01551	0.27437	0.02116	0	0.17373	0	0	0.02334	0.09752	0.07379	0.16993	0.10755	0.09642	0.00828	0.14184
d__Bacteria|p__Campylobacterota|c__Campylobacteria|o__Campylobacterales|f__Arcobacteraceae	0	0	0	0	0	0	0	0	0	0	0	0	0	0	0	0.00378	0	0	0	0	0	0	0	0	0	0	0	0	0	0	0	0	0	0	0	0	0	0	0	0	0	0	0	0	0	0	0	0	0
d__Bacteria|p__Campylobacterota|c__Campylobacteria|o__Campylobacterales|f__Arcobacteraceae|g__Pseudarcobacter	0	0	0	0	0	0	0	0	0	0	0	0	0	0	0	0.00378	0	0	0	0	0	0	0	0	0	0	0	0	0	0	0	0	0	0	0	0	0	0	0	0	0	0	0	0	0	0	0	0	0
d__Bacteria|p__Campylobacterota|c__Campylobacteria|o__Campylobacterales|f__Arcobacteraceae|g__Pseudarcobacter|s__Pseudarcobacter_unclassified	0	0	0	0	0	0	0	0	0	0	0	0	0	0	0	0.00378	0	0	0	0	0	0	0	0	0	0	0	0	0	0	0	0	0	0	0	0	0	0	0	0	0	0	0	0	0	0	0	0	0
d__Bacteria|p__Campylobacterota|c__Campylobacteria|o__Campylobacterales|f__Campylobacteraceae	0.0409	0	0	0.22891	0.00886	0.00918	0.05386	0.03174	0	0	0	0.01539	0	0.02789	0.24398	0.07188	0.00482	0.02194	0.03436	0.00991	0.00844	0.02689	0.21463	0.12461	0.00711	0.04027	0.23468	0	0	0	0.0404	3.12658	0.00798	0	0.01269	0.27437	0.02116	0	0.17373	0	0	0	0.09752	0.07379	0	0.10755	0.09642	0	0.14184
d__Bacteria|p__Campylobacterota|c__Campylobacteria|o__Campylobacterales|f__Campylobacteraceae|g__Campylobacter	0.0409	0	0	0.22891	0.00886	0.00918	0.05386	0.03174	0	0	0	0.01539	0	0.02789	0.24398	0.07188	0.00482	0.02194	0.03436	0.00991	0.00844	0.02689	0.21463	0.12461	0.00711	0.04027	0.23468	0	0	0	0.0404	3.12658	0.00798	0	0.01269	0.27437	0.02116	0	0.17373	0	0	0	0.09752	0.07379	0	0.10755	0.09642	0	0.14184
d__Bacteria|p__Campylobacterota|c__Campylobacteria|o__Campylobacterales|f__Campylobacteraceae|g__Campylobacter|s__Campylobacter_unclassified	0.0409	0	0	0.22891	0.00886	0.00918	0.05386	0.03174	0	0	0	0.01539	0	0.02789	0.24398	0.07188	0.00482	0.02194	0.03436	0.00991	0.00844	0.02689	0.21463	0.12461	0.00711	0.04027	0.23468	0	0	0	0.0404	3.12658	0.00798	0	0.01269	0.27437	0.02116	0	0.17373	0	0	0	0.09752	0.07379	0	0.10755	0.09642	0	0.14184
d__Bacteria|p__Campylobacterota|c__Campylobacteria|o__Campylobacterales|f__Helicobacteraceae	0.04908	0	0.02555	0.01431	0	0	0	0	0	0	0.02887	0	0.01218	0.00398	0.0303	0.01702	0	0	0.01031	0	0.01688	0.01176	0.05681	0.01326	0.00355	0.08054	0	0.00888	0	0.01016	0.01243	0	0.00319	0	0.00282	0	0	0	0	0	0	0.02334	0	0	0.16993	0	0	0.00828	0
d__Bacteria|p__Campylobacterota|c__Campylobacteria|o__Campylobacterales|f__Helicobacteraceae|g__Helicobacter	0.04908	0	0.02555	0.01431	0	0	0	0	0	0	0.02887	0	0.01218	0.00398	0.0303	0.01702	0	0	0.01031	0	0.01688	0.01176	0.05681	0.01326	0.00355	0.08054	0	0.00888	0	0.01016	0.01243	0	0.00319	0	0.00282	0	0	0	0	0	0	0.02334	0	0	0.16993	0	0	0.00828	0
d__Bacteria|p__Campylobacterota|c__Campylobacteria|o__Campylobacterales|f__Helicobacteraceae|g__Helicobacter|s__Helicobacter_unclassified	0.04908	0	0.02555	0.01431	0	0	0	0	0	0	0.02887	0	0.01218	0.00398	0.0303	0.01702	0	0	0.01031	0	0.01688	0.01176	0.05681	0.01326	0.00355	0.08054	0	0.00888	0	0.01016	0.01243	0	0.00319	0	0.00282	0	0	0	0	0	0	0.02334	0	0	0.16993	0	0	0.00828	0
d__Bacteria|p__Campylobacterota|c__Campylobacteria|o__Campylobacterales|f__Helicobacteraceae|g__Wolinella	0	0	0	0	0	0	0	0	0	0	0	0	0	0	0	0	0	0	0	0	0	0	0	0	0	0	0	0	0	0	0	0	0	0	0	0	0	0	0	0	0	0	0	0	0	0	0	0	0
d__Bacteria|p__Campylobacterota|c__Campylobacteria|o__Campylobacterales|f__Helicobacteraceae|g__Wolinella|s__Wolinella_unclassified	0	0	0	0	0	0	0	0	0	0	0	0	0	0	0	0	0	0	0	0	0	0	0	0	0	0	0	0	0	0	0	0	0	0	0	0	0	0	0	0	0	0	0	0	0	0	0	0	0
d__Bacteria|p__Campylobacterota|c__Campylobacteria|o__Campylobacterales|f__Sulfurospirillaceae	0	0	0	0	0	0	0	0	0	0	0	0	0	0	0	0	0	0	0	0	0	0	0	0	0	0	0	0.00355	0	0	0	0	0	0	0	0	0	0	0	0	0	0	0	0	0	0	0	0	0
d__Bacteria|p__Campylobacterota|c__Campylobacteria|o__Campylobacterales|f__Sulfurospirillaceae|g__Sulfurospirillum	0	0	0	0	0	0	0	0	0	0	0	0	0	0	0	0	0	0	0	0	0	0	0	0	0	0	0	0.00355	0	0	0	0	0	0	0	0	0	0	0	0	0	0	0	0	0	0	0	0	0
d__Bacteria|p__Campylobacterota|c__Campylobacteria|o__Campylobacterales|f__Sulfurospirillaceae|g__Sulfurospirillum|s__Sulfurospirillum_unclassified	0	0	0	0	0	0	0	0	0	0	0	0	0	0	0	0	0	0	0	0	0	0	0	0	0	0	0	0.00355	0	0	0	0	0	0	0	0	0	0	0	0	0	0	0	0	0	0	0	0	0
d__Bacteria|p__Candidatus_Saccharibacteria	0	0	0	0	0	0	0	0.00907	0	0	0	0	0	0	0	0	0.04095	0	0	0	0	0	0	0.02386	0	0	0	0	0	0	0	0	0	0	0	0	0.01628	0	0	0	0	0	0	0	0	0	0	0	0
d__Bacteria|p__Candidatus_Saccharibacteria|c__Candidatus_Saccharibacteria_unclassified	0	0	0	0	0	0	0	0.00907	0	0	0	0	0	0	0	0	0.04095	0	0	0	0	0	0	0.02386	0	0	0	0	0	0	0	0	0	0	0	0	0.01628	0	0	0	0	0	0	0	0	0	0	0	0
d__Bacteria|p__Candidatus_Saccharibacteria|c__Candidatus_Saccharibacteria_unclassified|o__Candidatus_Saccharibacteria_unclassified	0	0	0	0	0	0	0	0.00907	0	0	0	0	0	0	0	0	0.04095	0	0	0	0	0	0	0.02386	0	0	0	0	0	0	0	0	0	0	0	0	0.01628	0	0	0	0	0	0	0	0	0	0	0	0
d__Bacteria|p__Candidatus_Saccharibacteria|c__Candidatus_Saccharibacteria_unclassified|o__Candidatus_Saccharibacteria_unclassified|f__Candidatus_Saccharibacteria_unclassified	0	0	0	0	0	0	0	0.00907	0	0	0	0	0	0	0	0	0.04095	0	0	0	0	0	0	0.02386	0	0	0	0	0	0	0	0	0	0	0	0	0.01628	0	0	0	0	0	0	0	0	0	0	0	0
d__Bacteria|p__Candidatus_Saccharibacteria|c__Candidatus_Saccharibacteria_unclassified|o__Candidatus_Saccharibacteria_unclassified|f__Candidatus_Saccharibacteria_unclassified|g__Candidatus_Saccharibacteria_unclassified	0	0	0	0	0	0	0	0.00907	0	0	0	0	0	0	0	0	0.04095	0	0	0	0	0	0	0.02386	0	0	0	0	0	0	0	0	0	0	0	0	0.01628	0	0	0	0	0	0	0	0	0	0	0	0
d__Bacteria|p__Candidatus_Saccharibacteria|c__Candidatus_Saccharibacteria_unclassified|o__Candidatus_Saccharibacteria_unclassified|f__Candidatus_Saccharibacteria_unclassified|g__Candidatus_Saccharibacteria_unclassified|s__Candidatus_Saccharibacteria_unclassified	0	0	0	0	0	0	0	0.00907	0	0	0	0	0	0	0	0	0.04095	0	0	0	0	0	0	0.02386	0	0	0	0	0	0	0	0	0	0	0	0	0.01628	0	0	0	0	0	0	0	0	0	0	0	0
d__Bacteria|p__Chloroflexi	0	0	0	0	0	0	0	0	0	0	0	0	0.00406	0	0	0.06242	0.01686	0	0	0	0.081	0	0	0.1087	0	0	0	0	0	0	0.00466	0.01261	0	0.02689	0	0.00494	0	0	0.01297	0.00291	0.05572	0	0.11434	0	0	0	0	0.00828	0
d__Bacteria|p__Chloroflexi|c__Anaerolineae	0	0	0	0	0	0	0	0	0	0	0	0	0	0	0	0.05864	0	0	0	0	0.04725	0	0	0	0	0	0	0	0	0	0	0	0	0.00403	0	0	0	0	0.00519	0.00291	0	0	0	0	0	0	0	0.00828	0
d__Bacteria|p__Chloroflexi|c__Anaerolineae|o__Anaerolineales	0	0	0	0	0	0	0	0	0	0	0	0	0	0	0	0	0	0	0	0	0.04725	0	0	0	0	0	0	0	0	0	0	0	0	0	0	0	0	0	0	0.00291	0	0	0	0	0	0	0	0	0
d__Bacteria|p__Chloroflexi|c__Anaerolineae|o__Anaerolineales|f__Anaerolineaceae	0	0	0	0	0	0	0	0	0	0	0	0	0	0	0	0	0	0	0	0	0.04725	0	0	0	0	0	0	0	0	0	0	0	0	0	0	0	0	0	0	0.00291	0	0	0	0	0	0	0	0	0
d__Bacteria|p__Chloroflexi|c__Anaerolineae|o__Anaerolineales|f__Anaerolineaceae|g__Anaerolinea	0	0	0	0	0	0	0	0	0	0	0	0	0	0	0	0	0	0	0	0	0.02531	0	0	0	0	0	0	0	0	0	0	0	0	0	0	0	0	0	0	0.00291	0	0	0	0	0	0	0	0	0
d__Bacteria|p__Chloroflexi|c__Anaerolineae|o__Anaerolineales|f__Anaerolineaceae|g__Anaerolineaceae_unclassified	0	0	0	0	0	0	0	0	0	0	0	0	0	0	0	0	0	0	0	0	0.02194	0	0	0	0	0	0	0	0	0	0	0	0	0	0	0	0	0	0	0	0	0	0	0	0	0	0	0	0
d__Bacteria|p__Chloroflexi|c__Anaerolineae|o__Anaerolineales|f__Anaerolineaceae|g__Anaerolineaceae_unclassified|s__Anaerolineaceae_unclassified	0	0	0	0	0	0	0	0	0	0	0	0	0	0	0	0	0	0	0	0	0.02194	0	0	0	0	0	0	0	0	0	0	0	0	0	0	0	0	0	0	0	0	0	0	0	0	0	0	0	0
d__Bacteria|p__Chloroflexi|c__Anaerolineae|o__Anaerolineales|f__Anaerolineaceae|g__Anaerolinea|s__Anaerolinea_unclassified	0	0	0	0	0	0	0	0	0	0	0	0	0	0	0	0	0	0	0	0	0	0	0	0	0	0	0	0	0	0	0	0	0	0	0	0	0	0	0	0.00291	0	0	0	0	0	0	0	0	0
d__Bacteria|p__Chloroflexi|c__Anaerolineae|o__Anaerolineales|f__Anaerolineaceae|g__Anaerolinea|s__uncultured_Anaerolinea_sp.	0	0	0	0	0	0	0	0	0	0	0	0	0	0	0	0	0	0	0	0	0.02531	0	0	0	0	0	0	0	0	0	0	0	0	0	0	0	0	0	0	0	0	0	0	0	0	0	0	0	0
d__Bacteria|p__Chloroflexi|c__Anaerolineae|o__Ardenticatenales	0	0	0	0	0	0	0	0	0	0	0	0	0	0	0	0	0	0	0	0	0	0	0	0	0	0	0	0	0	0	0	0	0	0.00403	0	0	0	0	0	0	0	0	0	0	0	0	0	0	0
d__Bacteria|p__Chloroflexi|c__Anaerolineae|o__Ardenticatenales|f__Ardenticatenales_unclassified	0	0	0	0	0	0	0	0	0	0	0	0	0	0	0	0	0	0	0	0	0	0	0	0	0	0	0	0	0	0	0	0	0	0.00403	0	0	0	0	0	0	0	0	0	0	0	0	0	0	0
d__Bacteria|p__Chloroflexi|c__Anaerolineae|o__Ardenticatenales|f__Ardenticatenales_unclassified|g__Ardenticatenales_unclassified	0	0	0	0	0	0	0	0	0	0	0	0	0	0	0	0	0	0	0	0	0	0	0	0	0	0	0	0	0	0	0	0	0	0.00403	0	0	0	0	0	0	0	0	0	0	0	0	0	0	0
d__Bacteria|p__Chloroflexi|c__Anaerolineae|o__Ardenticatenales|f__Ardenticatenales_unclassified|g__Ardenticatenales_unclassified|s__Ardenticatenales_unclassified	0	0	0	0	0	0	0	0	0	0	0	0	0	0	0	0	0	0	0	0	0	0	0	0	0	0	0	0	0	0	0	0	0	0.00403	0	0	0	0	0	0	0	0	0	0	0	0	0	0	0
d__Bacteria|p__Chloroflexi|c__Anaerolineae|o__SBR1031	0	0	0	0	0	0	0	0	0	0	0	0	0	0	0	0.05864	0	0	0	0	0	0	0	0	0	0	0	0	0	0	0	0	0	0	0	0	0	0	0.00519	0	0	0	0	0	0	0	0	0.00828	0
d__Bacteria|p__Chloroflexi|c__Anaerolineae|o__SBR1031|f__SBR1031_unclassified	0	0	0	0	0	0	0	0	0	0	0	0	0	0	0	0.05864	0	0	0	0	0	0	0	0	0	0	0	0	0	0	0	0	0	0	0	0	0	0	0.00519	0	0	0	0	0	0	0	0	0.00828	0
d__Bacteria|p__Chloroflexi|c__Anaerolineae|o__SBR1031|f__SBR1031_unclassified|g__SBR1031_unclassified	0	0	0	0	0	0	0	0	0	0	0	0	0	0	0	0.05864	0	0	0	0	0	0	0	0	0	0	0	0	0	0	0	0	0	0	0	0	0	0	0.00519	0	0	0	0	0	0	0	0	0.00828	0
d__Bacteria|p__Chloroflexi|c__Anaerolineae|o__SBR1031|f__SBR1031_unclassified|g__SBR1031_unclassified|s__SBR1031_unclassified	0	0	0	0	0	0	0	0	0	0	0	0	0	0	0	0.05864	0	0	0	0	0	0	0	0	0	0	0	0	0	0	0	0	0	0	0	0	0	0	0.00519	0	0	0	0	0	0	0	0	0.00828	0
d__Bacteria|p__Chloroflexi|c__Chloroflexi_unclassified	0	0	0	0	0	0	0	0	0	0	0	0	0	0	0	0	0	0	0	0	0	0	0	0	0	0	0	0	0	0	0	0	0	0	0	0.00494	0	0	0	0	0	0	0	0	0	0	0	0	0
d__Bacteria|p__Chloroflexi|c__Chloroflexi_unclassified|o__Chloroflexi_unclassified	0	0	0	0	0	0	0	0	0	0	0	0	0	0	0	0	0	0	0	0	0	0	0	0	0	0	0	0	0	0	0	0	0	0	0	0.00494	0	0	0	0	0	0	0	0	0	0	0	0	0
d__Bacteria|p__Chloroflexi|c__Chloroflexi_unclassified|o__Chloroflexi_unclassified|f__Chloroflexi_unclassified	0	0	0	0	0	0	0	0	0	0	0	0	0	0	0	0	0	0	0	0	0	0	0	0	0	0	0	0	0	0	0	0	0	0	0	0.00494	0	0	0	0	0	0	0	0	0	0	0	0	0
d__Bacteria|p__Chloroflexi|c__Chloroflexi_unclassified|o__Chloroflexi_unclassified|f__Chloroflexi_unclassified|g__Chloroflexi_unclassified	0	0	0	0	0	0	0	0	0	0	0	0	0	0	0	0	0	0	0	0	0	0	0	0	0	0	0	0	0	0	0	0	0	0	0	0.00494	0	0	0	0	0	0	0	0	0	0	0	0	0
d__Bacteria|p__Chloroflexi|c__Chloroflexi_unclassified|o__Chloroflexi_unclassified|f__Chloroflexi_unclassified|g__Chloroflexi_unclassified|s__Chloroflexi_unclassified	0	0	0	0	0	0	0	0	0	0	0	0	0	0	0	0	0	0	0	0	0	0	0	0	0	0	0	0	0	0	0	0	0	0	0	0.00494	0	0	0	0	0	0	0	0	0	0	0	0	0
d__Bacteria|p__Chloroflexi|c__Chloroflexia	0	0	0	0	0	0	0	0	0	0	0	0	0.00406	0	0	0	0.01686	0	0	0	0	0	0	0.08484	0	0	0	0	0	0	0	0.01261	0	0.0121	0	0	0	0	0.00778	0	0.05572	0	0.01513	0	0	0	0	0	0
d__Bacteria|p__Chloroflexi|c__Chloroflexia|o__Chloroflexales	0	0	0	0	0	0	0	0	0	0	0	0	0.00406	0	0	0	0	0	0	0	0	0	0	0	0	0	0	0	0	0	0	0	0	0	0	0	0	0	0	0	0	0	0.01009	0	0	0	0	0	0
d__Bacteria|p__Chloroflexi|c__Chloroflexia|o__Chloroflexales|f__Roseiflexaceae	0	0	0	0	0	0	0	0	0	0	0	0	0.00406	0	0	0	0	0	0	0	0	0	0	0	0	0	0	0	0	0	0	0	0	0	0	0	0	0	0	0	0	0	0.01009	0	0	0	0	0	0
d__Bacteria|p__Chloroflexi|c__Chloroflexia|o__Chloroflexales|f__Roseiflexaceae|g__Kouleothrix	0	0	0	0	0	0	0	0	0	0	0	0	0	0	0	0	0	0	0	0	0	0	0	0	0	0	0	0	0	0	0	0	0	0	0	0	0	0	0	0	0	0	0	0	0	0	0	0	0
d__Bacteria|p__Chloroflexi|c__Chloroflexia|o__Chloroflexales|f__Roseiflexaceae|g__Kouleothrix|s__uncultured_Kouleothrix_sp.	0	0	0	0	0	0	0	0	0	0	0	0	0	0	0	0	0	0	0	0	0	0	0	0	0	0	0	0	0	0	0	0	0	0	0	0	0	0	0	0	0	0	0	0	0	0	0	0	0
d__Bacteria|p__Chloroflexi|c__Chloroflexia|o__Chloroflexales|f__Roseiflexaceae|g__Roseiflexaceae_unclassified	0	0	0	0	0	0	0	0	0	0	0	0	0.00406	0	0	0	0	0	0	0	0	0	0	0	0	0	0	0	0	0	0	0	0	0	0	0	0	0	0	0	0	0	0.01009	0	0	0	0	0	0
d__Bacteria|p__Chloroflexi|c__Chloroflexia|o__Chloroflexales|f__Roseiflexaceae|g__Roseiflexaceae_unclassified|s__Roseiflexaceae_unclassified	0	0	0	0	0	0	0	0	0	0	0	0	0.00406	0	0	0	0	0	0	0	0	0	0	0	0	0	0	0	0	0	0	0	0	0	0	0	0	0	0	0	0	0	0.01009	0	0	0	0	0	0
d__Bacteria|p__Chloroflexi|c__Chloroflexia|o__Kallotenuales	0	0	0	0	0	0	0	0	0	0	0	0	0	0	0	0	0.01686	0	0	0	0	0	0	0	0	0	0	0	0	0	0	0	0	0	0	0	0	0	0	0	0	0	0	0	0	0	0	0	0
d__Bacteria|p__Chloroflexi|c__Chloroflexia|o__Kallotenuales|f__AKIW781	0	0	0	0	0	0	0	0	0	0	0	0	0	0	0	0	0	0	0	0	0	0	0	0	0	0	0	0	0	0	0	0	0	0	0	0	0	0	0	0	0	0	0	0	0	0	0	0	0
d__Bacteria|p__Chloroflexi|c__Chloroflexia|o__Kallotenuales|f__AKIW781|g__AKIW781_unclassified	0	0	0	0	0	0	0	0	0	0	0	0	0	0	0	0	0	0	0	0	0	0	0	0	0	0	0	0	0	0	0	0	0	0	0	0	0	0	0	0	0	0	0	0	0	0	0	0	0
d__Bacteria|p__Chloroflexi|c__Chloroflexia|o__Kallotenuales|f__AKIW781|g__AKIW781_unclassified|s__AKIW781_unclassified	0	0	0	0	0	0	0	0	0	0	0	0	0	0	0	0	0	0	0	0	0	0	0	0	0	0	0	0	0	0	0	0	0	0	0	0	0	0	0	0	0	0	0	0	0	0	0	0	0
d__Bacteria|p__Chloroflexi|c__Chloroflexia|o__Kallotenuales|f__Kallotenuaceae	0	0	0	0	0	0	0	0	0	0	0	0	0	0	0	0	0.01686	0	0	0	0	0	0	0	0	0	0	0	0	0	0	0	0	0	0	0	0	0	0	0	0	0	0	0	0	0	0	0	0
d__Bacteria|p__Chloroflexi|c__Chloroflexia|o__Kallotenuales|f__Kallotenuaceae|g__Kallotenue	0	0	0	0	0	0	0	0	0	0	0	0	0	0	0	0	0.01686	0	0	0	0	0	0	0	0	0	0	0	0	0	0	0	0	0	0	0	0	0	0	0	0	0	0	0	0	0	0	0	0
d__Bacteria|p__Chloroflexi|c__Chloroflexia|o__Kallotenuales|f__Kallotenuaceae|g__Kallotenue|s__Kallotenue_papyrolyticum	0	0	0	0	0	0	0	0	0	0	0	0	0	0	0	0	0.01686	0	0	0	0	0	0	0	0	0	0	0	0	0	0	0	0	0	0	0	0	0	0	0	0	0	0	0	0	0	0	0	0
d__Bacteria|p__Chloroflexi|c__Chloroflexia|o__Thermomicrobiales	0	0	0	0	0	0	0	0	0	0	0	0	0	0	0	0	0	0	0	0	0	0	0	0.08484	0	0	0	0	0	0	0	0.01261	0	0.0121	0	0	0	0	0.00778	0	0.05572	0	0.00504	0	0	0	0	0	0
d__Bacteria|p__Chloroflexi|c__Chloroflexia|o__Thermomicrobiales|f__JG30-KF-CM45	0	0	0	0	0	0	0	0	0	0	0	0	0	0	0	0	0	0	0	0	0	0	0	0	0	0	0	0	0	0	0	0.01261	0	0	0	0	0	0	0.00778	0	0.05572	0	0.00504	0	0	0	0	0	0
d__Bacteria|p__Chloroflexi|c__Chloroflexia|o__Thermomicrobiales|f__JG30-KF-CM45|g__JG30-KF-CM45_unclassified	0	0	0	0	0	0	0	0	0	0	0	0	0	0	0	0	0	0	0	0	0	0	0	0	0	0	0	0	0	0	0	0.01261	0	0	0	0	0	0	0.00778	0	0.05572	0	0.00504	0	0	0	0	0	0
d__Bacteria|p__Chloroflexi|c__Chloroflexia|o__Thermomicrobiales|f__JG30-KF-CM45|g__JG30-KF-CM45_unclassified|s__JG30-KF-CM45_unclassified	0	0	0	0	0	0	0	0	0	0	0	0	0	0	0	0	0	0	0	0	0	0	0	0	0	0	0	0	0	0	0	0.01261	0	0	0	0	0	0	0.00778	0	0.05572	0	0.00504	0	0	0	0	0	0
d__Bacteria|p__Chloroflexi|c__Chloroflexia|o__Thermomicrobiales|f__Thermomicrobiaceae	0	0	0	0	0	0	0	0	0	0	0	0	0	0	0	0	0	0	0	0	0	0	0	0.08484	0	0	0	0	0	0	0	0	0	0.0121	0	0	0	0	0	0	0	0	0	0	0	0	0	0	0
d__Bacteria|p__Chloroflexi|c__Chloroflexia|o__Thermomicrobiales|f__Thermomicrobiaceae|g__Sphaerobacter	0	0	0	0	0	0	0	0	0	0	0	0	0	0	0	0	0	0	0	0	0	0	0	0.08484	0	0	0	0	0	0	0	0	0	0.0121	0	0	0	0	0	0	0	0	0	0	0	0	0	0	0
d__Bacteria|p__Chloroflexi|c__Chloroflexia|o__Thermomicrobiales|f__Thermomicrobiaceae|g__Sphaerobacter|s__Sphaerobacter_unclassified	0	0	0	0	0	0	0	0	0	0	0	0	0	0	0	0	0	0	0	0	0	0	0	0.08484	0	0	0	0	0	0	0	0	0	0.0121	0	0	0	0	0	0	0	0	0	0	0	0	0	0	0
d__Bacteria|p__Chloroflexi|c__Dehalococcoidia	0	0	0	0	0	0	0	0	0	0	0	0	0	0	0	0	0	0	0	0	0	0	0	0	0	0	0	0	0	0	0	0	0	0	0	0	0	0	0	0	0	0	0.00673	0	0	0	0	0	0
d__Bacteria|p__Chloroflexi|c__Dehalococcoidia|o__S085	0	0	0	0	0	0	0	0	0	0	0	0	0	0	0	0	0	0	0	0	0	0	0	0	0	0	0	0	0	0	0	0	0	0	0	0	0	0	0	0	0	0	0.00673	0	0	0	0	0	0
d__Bacteria|p__Chloroflexi|c__Dehalococcoidia|o__S085|f__S085_unclassified	0	0	0	0	0	0	0	0	0	0	0	0	0	0	0	0	0	0	0	0	0	0	0	0	0	0	0	0	0	0	0	0	0	0	0	0	0	0	0	0	0	0	0.00673	0	0	0	0	0	0
d__Bacteria|p__Chloroflexi|c__Dehalococcoidia|o__S085|f__S085_unclassified|g__S085_unclassified	0	0	0	0	0	0	0	0	0	0	0	0	0	0	0	0	0	0	0	0	0	0	0	0	0	0	0	0	0	0	0	0	0	0	0	0	0	0	0	0	0	0	0.00673	0	0	0	0	0	0
d__Bacteria|p__Chloroflexi|c__Dehalococcoidia|o__S085|f__S085_unclassified|g__S085_unclassified|s__S085_unclassified	0	0	0	0	0	0	0	0	0	0	0	0	0	0	0	0	0	0	0	0	0	0	0	0	0	0	0	0	0	0	0	0	0	0	0	0	0	0	0	0	0	0	0.00673	0	0	0	0	0	0
d__Bacteria|p__Chloroflexi|c__Gitt-GS-136	0	0	0	0	0	0	0	0	0	0	0	0	0	0	0	0	0	0	0	0	0	0	0	0	0	0	0	0	0	0	0	0	0	0.00269	0	0	0	0	0	0	0	0	0.06053	0	0	0	0	0	0
d__Bacteria|p__Chloroflexi|c__Gitt-GS-136|o__Gitt-GS-136_unclassified	0	0	0	0	0	0	0	0	0	0	0	0	0	0	0	0	0	0	0	0	0	0	0	0	0	0	0	0	0	0	0	0	0	0.00269	0	0	0	0	0	0	0	0	0.06053	0	0	0	0	0	0
d__Bacteria|p__Chloroflexi|c__Gitt-GS-136|o__Gitt-GS-136_unclassified|f__Gitt-GS-136_unclassified	0	0	0	0	0	0	0	0	0	0	0	0	0	0	0	0	0	0	0	0	0	0	0	0	0	0	0	0	0	0	0	0	0	0.00269	0	0	0	0	0	0	0	0	0.06053	0	0	0	0	0	0
d__Bacteria|p__Chloroflexi|c__Gitt-GS-136|o__Gitt-GS-136_unclassified|f__Gitt-GS-136_unclassified|g__Gitt-GS-136_unclassified	0	0	0	0	0	0	0	0	0	0	0	0	0	0	0	0	0	0	0	0	0	0	0	0	0	0	0	0	0	0	0	0	0	0.00269	0	0	0	0	0	0	0	0	0.06053	0	0	0	0	0	0
d__Bacteria|p__Chloroflexi|c__Gitt-GS-136|o__Gitt-GS-136_unclassified|f__Gitt-GS-136_unclassified|g__Gitt-GS-136_unclassified|s__Gitt-GS-136_unclassified	0	0	0	0	0	0	0	0	0	0	0	0	0	0	0	0	0	0	0	0	0	0	0	0	0	0	0	0	0	0	0	0	0	0.00269	0	0	0	0	0	0	0	0	0.06053	0	0	0	0	0	0
d__Bacteria|p__Chloroflexi|c__JG30-KF-CM66	0	0	0	0	0	0	0	0	0	0	0	0	0	0	0	0	0	0	0	0	0	0	0	0	0	0	0	0	0	0	0.00466	0	0	0	0	0	0	0	0	0	0	0	0	0	0	0	0	0	0
d__Bacteria|p__Chloroflexi|c__JG30-KF-CM66|o__JG30-KF-CM66_unclassified	0	0	0	0	0	0	0	0	0	0	0	0	0	0	0	0	0	0	0	0	0	0	0	0	0	0	0	0	0	0	0.00466	0	0	0	0	0	0	0	0	0	0	0	0	0	0	0	0	0	0
d__Bacteria|p__Chloroflexi|c__JG30-KF-CM66|o__JG30-KF-CM66_unclassified|f__JG30-KF-CM66_unclassified	0	0	0	0	0	0	0	0	0	0	0	0	0	0	0	0	0	0	0	0	0	0	0	0	0	0	0	0	0	0	0.00466	0	0	0	0	0	0	0	0	0	0	0	0	0	0	0	0	0	0
d__Bacteria|p__Chloroflexi|c__JG30-KF-CM66|o__JG30-KF-CM66_unclassified|f__JG30-KF-CM66_unclassified|g__JG30-KF-CM66_unclassified	0	0	0	0	0	0	0	0	0	0	0	0	0	0	0	0	0	0	0	0	0	0	0	0	0	0	0	0	0	0	0.00466	0	0	0	0	0	0	0	0	0	0	0	0	0	0	0	0	0	0
d__Bacteria|p__Chloroflexi|c__JG30-KF-CM66|o__JG30-KF-CM66_unclassified|f__JG30-KF-CM66_unclassified|g__JG30-KF-CM66_unclassified|s__JG30-KF-CM66_unclassified	0	0	0	0	0	0	0	0	0	0	0	0	0	0	0	0	0	0	0	0	0	0	0	0	0	0	0	0	0	0	0.00466	0	0	0	0	0	0	0	0	0	0	0	0	0	0	0	0	0	0
d__Bacteria|p__Chloroflexi|c__KD4-96	0	0	0	0	0	0	0	0	0	0	0	0	0	0	0	0	0	0	0	0	0	0	0	0	0	0	0	0	0	0	0	0	0	0	0	0	0	0	0	0	0	0	0	0	0	0	0	0	0
d__Bacteria|p__Chloroflexi|c__KD4-96|o__KD4-96_unclassified	0	0	0	0	0	0	0	0	0	0	0	0	0	0	0	0	0	0	0	0	0	0	0	0	0	0	0	0	0	0	0	0	0	0	0	0	0	0	0	0	0	0	0	0	0	0	0	0	0
d__Bacteria|p__Chloroflexi|c__KD4-96|o__KD4-96_unclassified|f__KD4-96_unclassified	0	0	0	0	0	0	0	0	0	0	0	0	0	0	0	0	0	0	0	0	0	0	0	0	0	0	0	0	0	0	0	0	0	0	0	0	0	0	0	0	0	0	0	0	0	0	0	0	0
d__Bacteria|p__Chloroflexi|c__KD4-96|o__KD4-96_unclassified|f__KD4-96_unclassified|g__KD4-96_unclassified	0	0	0	0	0	0	0	0	0	0	0	0	0	0	0	0	0	0	0	0	0	0	0	0	0	0	0	0	0	0	0	0	0	0	0	0	0	0	0	0	0	0	0	0	0	0	0	0	0
d__Bacteria|p__Chloroflexi|c__KD4-96|o__KD4-96_unclassified|f__KD4-96_unclassified|g__KD4-96_unclassified|s__KD4-96_unclassified	0	0	0	0	0	0	0	0	0	0	0	0	0	0	0	0	0	0	0	0	0	0	0	0	0	0	0	0	0	0	0	0	0	0	0	0	0	0	0	0	0	0	0	0	0	0	0	0	0
d__Bacteria|p__Chloroflexi|c__Ktedonobacteria	0	0	0	0	0	0	0	0	0	0	0	0	0	0	0	0.00378	0	0	0	0	0.03375	0	0	0	0	0	0	0	0	0	0	0	0	0	0	0	0	0	0	0	0	0	0.03195	0	0	0	0	0	0
d__Bacteria|p__Chloroflexi|c__Ktedonobacteria|o__C0119	0	0	0	0	0	0	0	0	0	0	0	0	0	0	0	0	0	0	0	0	0.03375	0	0	0	0	0	0	0	0	0	0	0	0	0	0	0	0	0	0	0	0	0	0.03195	0	0	0	0	0	0
d__Bacteria|p__Chloroflexi|c__Ktedonobacteria|o__C0119|f__C0119_unclassified	0	0	0	0	0	0	0	0	0	0	0	0	0	0	0	0	0	0	0	0	0.03375	0	0	0	0	0	0	0	0	0	0	0	0	0	0	0	0	0	0	0	0	0	0.03195	0	0	0	0	0	0
d__Bacteria|p__Chloroflexi|c__Ktedonobacteria|o__C0119|f__C0119_unclassified|g__C0119_unclassified	0	0	0	0	0	0	0	0	0	0	0	0	0	0	0	0	0	0	0	0	0.03375	0	0	0	0	0	0	0	0	0	0	0	0	0	0	0	0	0	0	0	0	0	0.03195	0	0	0	0	0	0
d__Bacteria|p__Chloroflexi|c__Ktedonobacteria|o__C0119|f__C0119_unclassified|g__C0119_unclassified|s__C0119_unclassified	0	0	0	0	0	0	0	0	0	0	0	0	0	0	0	0	0	0	0	0	0.03375	0	0	0	0	0	0	0	0	0	0	0	0	0	0	0	0	0	0	0	0	0	0.03195	0	0	0	0	0	0
d__Bacteria|p__Chloroflexi|c__Ktedonobacteria|o__Ktedonobacterales	0	0	0	0	0	0	0	0	0	0	0	0	0	0	0	0.00378	0	0	0	0	0	0	0	0	0	0	0	0	0	0	0	0	0	0	0	0	0	0	0	0	0	0	0	0	0	0	0	0	0
d__Bacteria|p__Chloroflexi|c__Ktedonobacteria|o__Ktedonobacterales|f__Ktedonobacteraceae	0	0	0	0	0	0	0	0	0	0	0	0	0	0	0	0.00378	0	0	0	0	0	0	0	0	0	0	0	0	0	0	0	0	0	0	0	0	0	0	0	0	0	0	0	0	0	0	0	0	0
d__Bacteria|p__Chloroflexi|c__Ktedonobacteria|o__Ktedonobacterales|f__Ktedonobacteraceae|g__1959-1	0	0	0	0	0	0	0	0	0	0	0	0	0	0	0	0.00378	0	0	0	0	0	0	0	0	0	0	0	0	0	0	0	0	0	0	0	0	0	0	0	0	0	0	0	0	0	0	0	0	0
d__Bacteria|p__Chloroflexi|c__Ktedonobacteria|o__Ktedonobacterales|f__Ktedonobacteraceae|g__1959-1|s__1959-1_unclassified	0	0	0	0	0	0	0	0	0	0	0	0	0	0	0	0.00378	0	0	0	0	0	0	0	0	0	0	0	0	0	0	0	0	0	0	0	0	0	0	0	0	0	0	0	0	0	0	0	0	0
d__Bacteria|p__Chloroflexi|c__N9D0	0	0	0	0	0	0	0	0	0	0	0	0	0	0	0	0	0	0	0	0	0	0	0	0	0	0	0	0	0	0	0	0	0	0.00807	0	0	0	0	0	0	0	0	0	0	0	0	0	0	0
d__Bacteria|p__Chloroflexi|c__N9D0|o__N9D0_unclassified	0	0	0	0	0	0	0	0	0	0	0	0	0	0	0	0	0	0	0	0	0	0	0	0	0	0	0	0	0	0	0	0	0	0.00807	0	0	0	0	0	0	0	0	0	0	0	0	0	0	0
d__Bacteria|p__Chloroflexi|c__N9D0|o__N9D0_unclassified|f__N9D0_unclassified	0	0	0	0	0	0	0	0	0	0	0	0	0	0	0	0	0	0	0	0	0	0	0	0	0	0	0	0	0	0	0	0	0	0.00807	0	0	0	0	0	0	0	0	0	0	0	0	0	0	0
d__Bacteria|p__Chloroflexi|c__N9D0|o__N9D0_unclassified|f__N9D0_unclassified|g__N9D0_unclassified	0	0	0	0	0	0	0	0	0	0	0	0	0	0	0	0	0	0	0	0	0	0	0	0	0	0	0	0	0	0	0	0	0	0.00807	0	0	0	0	0	0	0	0	0	0	0	0	0	0	0
d__Bacteria|p__Chloroflexi|c__N9D0|o__N9D0_unclassified|f__N9D0_unclassified|g__N9D0_unclassified|s__N9D0_unclassified	0	0	0	0	0	0	0	0	0	0	0	0	0	0	0	0	0	0	0	0	0	0	0	0	0	0	0	0	0	0	0	0	0	0.00807	0	0	0	0	0	0	0	0	0	0	0	0	0	0	0
d__Bacteria|p__Chloroflexi|c__TK10	0	0	0	0	0	0	0	0	0	0	0	0	0	0	0	0	0	0	0	0	0	0	0	0.02386	0	0	0	0	0	0	0	0	0	0	0	0	0	0	0	0	0	0	0	0	0	0	0	0	0
d__Bacteria|p__Chloroflexi|c__TK10|o__TK10_unclassified	0	0	0	0	0	0	0	0	0	0	0	0	0	0	0	0	0	0	0	0	0	0	0	0.02386	0	0	0	0	0	0	0	0	0	0	0	0	0	0	0	0	0	0	0	0	0	0	0	0	0
d__Bacteria|p__Chloroflexi|c__TK10|o__TK10_unclassified|f__TK10_unclassified	0	0	0	0	0	0	0	0	0	0	0	0	0	0	0	0	0	0	0	0	0	0	0	0.02386	0	0	0	0	0	0	0	0	0	0	0	0	0	0	0	0	0	0	0	0	0	0	0	0	0
d__Bacteria|p__Chloroflexi|c__TK10|o__TK10_unclassified|f__TK10_unclassified|g__TK10_unclassified	0	0	0	0	0	0	0	0	0	0	0	0	0	0	0	0	0	0	0	0	0	0	0	0.02386	0	0	0	0	0	0	0	0	0	0	0	0	0	0	0	0	0	0	0	0	0	0	0	0	0
d__Bacteria|p__Chloroflexi|c__TK10|o__TK10_unclassified|f__TK10_unclassified|g__TK10_unclassified|s__TK10_unclassified	0	0	0	0	0	0	0	0	0	0	0	0	0	0	0	0	0	0	0	0	0	0	0	0.02386	0	0	0	0	0	0	0	0	0	0	0	0	0	0	0	0	0	0	0	0	0	0	0	0	0
d__Bacteria|p__Cloacimonadota	0	0	0	0	0	0	0	0	0	0	0	0	0	0	0	0	0	0	0	0	0	0	0	0	0	0	0	0	0	0	0	0	0	0	0	0	0	0	0	0	0	0	0	0	0	0	0	0	0
d__Bacteria|p__Cloacimonadota|c__Cloacimonadia	0	0	0	0	0	0	0	0	0	0	0	0	0	0	0	0	0	0	0	0	0	0	0	0	0	0	0	0	0	0	0	0	0	0	0	0	0	0	0	0	0	0	0	0	0	0	0	0	0
d__Bacteria|p__Cloacimonadota|c__Cloacimonadia|o__Cloacimonadales	0	0	0	0	0	0	0	0	0	0	0	0	0	0	0	0	0	0	0	0	0	0	0	0	0	0	0	0	0	0	0	0	0	0	0	0	0	0	0	0	0	0	0	0	0	0	0	0	0
d__Bacteria|p__Cloacimonadota|c__Cloacimonadia|o__Cloacimonadales|f__Cloacimonadaceae	0	0	0	0	0	0	0	0	0	0	0	0	0	0	0	0	0	0	0	0	0	0	0	0	0	0	0	0	0	0	0	0	0	0	0	0	0	0	0	0	0	0	0	0	0	0	0	0	0
d__Bacteria|p__Cloacimonadota|c__Cloacimonadia|o__Cloacimonadales|f__Cloacimonadaceae|g__W5	0	0	0	0	0	0	0	0	0	0	0	0	0	0	0	0	0	0	0	0	0	0	0	0	0	0	0	0	0	0	0	0	0	0	0	0	0	0	0	0	0	0	0	0	0	0	0	0	0
d__Bacteria|p__Cloacimonadota|c__Cloacimonadia|o__Cloacimonadales|f__Cloacimonadaceae|g__W5|s__W5_unclassified	0	0	0	0	0	0	0	0	0	0	0	0	0	0	0	0	0	0	0	0	0	0	0	0	0	0	0	0	0	0	0	0	0	0	0	0	0	0	0	0	0	0	0	0	0	0	0	0	0
d__Bacteria|p__Cyanobacteria	0.0818	0	0	3.82001	0	0	0.00653	0.01058	0.02884	0	0.01155	0	0	0	0	0.00946	0.00482	0.02633	0.00344	0	0.00338	0	0.27776	0.0053	0	0	0	0	0.01892	0.00871	0.04351	0.01962	0	0.02016	0.00705	0	0	0	0	0.00581	0	0.4714	0.47246	0	0	0	0	0	0.00501
d__Bacteria|p__Cyanobacteria|c__Cyanobacteria_unclassified	0	0	0	0	0	0	0	0	0	0	0	0	0	0	0	0	0	0	0	0	0	0	0	0	0	0	0	0	0	0	0	0	0	0.00269	0	0	0	0	0	0	0	0	0	0	0	0	0	0	0
d__Bacteria|p__Cyanobacteria|c__Cyanobacteria_unclassified|o__Cyanobacteria_unclassified	0	0	0	0	0	0	0	0	0	0	0	0	0	0	0	0	0	0	0	0	0	0	0	0	0	0	0	0	0	0	0	0	0	0.00269	0	0	0	0	0	0	0	0	0	0	0	0	0	0	0
d__Bacteria|p__Cyanobacteria|c__Cyanobacteria_unclassified|o__Cyanobacteria_unclassified|f__Cyanobacteria_unclassified	0	0	0	0	0	0	0	0	0	0	0	0	0	0	0	0	0	0	0	0	0	0	0	0	0	0	0	0	0	0	0	0	0	0.00269	0	0	0	0	0	0	0	0	0	0	0	0	0	0	0
d__Bacteria|p__Cyanobacteria|c__Cyanobacteria_unclassified|o__Cyanobacteria_unclassified|f__Cyanobacteria_unclassified|g__Cyanobacteria_unclassified	0	0	0	0	0	0	0	0	0	0	0	0	0	0	0	0	0	0	0	0	0	0	0	0	0	0	0	0	0	0	0	0	0	0.00269	0	0	0	0	0	0	0	0	0	0	0	0	0	0	0
d__Bacteria|p__Cyanobacteria|c__Cyanobacteria_unclassified|o__Cyanobacteria_unclassified|f__Cyanobacteria_unclassified|g__Cyanobacteria_unclassified|s__Cyanobacteria_unclassified	0	0	0	0	0	0	0	0	0	0	0	0	0	0	0	0	0	0	0	0	0	0	0	0	0	0	0	0	0	0	0	0	0	0.00269	0	0	0	0	0	0	0	0	0	0	0	0	0	0	0
d__Bacteria|p__Cyanobacteria|c__Cyanobacteriia	0.0818	0	0	3.82001	0	0	0	0.01058	0.02884	0	0.01155	0	0	0	0	0.00946	0	0.02633	0	0	0.00338	0	0.27776	0.0053	0	0	0	0	0.01892	0.00871	0.04351	0.01962	0	0.01747	0.00705	0	0	0	0	0.00581	0	0.4714	0.47246	0	0	0	0	0	0.00501
d__Bacteria|p__Cyanobacteria|c__Cyanobacteriia|o__Chloroplast	0.0818	0	0	3.7914	0	0	0	0	0.01018	0	0	0	0	0	0	0.00946	0	0	0	0	0.00338	0	0.27776	0.0053	0	0	0	0	0.01892	0.00871	0	0	0	0.00269	0	0	0	0	0	0.00581	0	0.26604	0.37662	0	0	0	0	0	0.00501
d__Bacteria|p__Cyanobacteria|c__Cyanobacteriia|o__Chloroplast|f__Chloroplast_unclassified	0.0818	0	0	3.7914	0	0	0	0	0.01018	0	0	0	0	0	0	0.00946	0	0	0	0	0.00338	0	0.27776	0.0053	0	0	0	0	0.01892	0.00871	0	0	0	0.00269	0	0	0	0	0	0.00581	0	0.26604	0.37662	0	0	0	0	0	0.00501
d__Bacteria|p__Cyanobacteria|c__Cyanobacteriia|o__Chloroplast|f__Chloroplast_unclassified|g__Chloroplast_unclassified	0.0818	0	0	3.7914	0	0	0	0	0.01018	0	0	0	0	0	0	0.00946	0	0	0	0	0.00338	0	0.27776	0.0053	0	0	0	0	0.01892	0.00871	0	0	0	0.00269	0	0	0	0	0	0.00581	0	0.26604	0.37662	0	0	0	0	0	0.00501
d__Bacteria|p__Cyanobacteria|c__Cyanobacteriia|o__Chloroplast|f__Chloroplast_unclassified|g__Chloroplast_unclassified|s__Chloroplast_unclassified	0.0818	0	0	3.7914	0	0	0	0	0.01018	0	0	0	0	0	0	0.00946	0	0	0	0	0.00338	0	0.27776	0.0053	0	0	0	0	0.01892	0.00871	0	0	0	0.00269	0	0	0	0	0	0.00581	0	0.26604	0.37662	0	0	0	0	0	0.00501
d__Bacteria|p__Cyanobacteria|c__Cyanobacteriia|o__Cyanobacteriales	0	0	0	0.02861	0	0	0	0.01058	0	0	0.01155	0	0	0	0	0	0	0.02633	0	0	0	0	0	0	0	0	0	0	0	0	0	0.0028	0	0.00403	0.00705	0	0	0	0	0	0	0.17736	0.09584	0	0	0	0	0	0
d__Bacteria|p__Cyanobacteria|c__Cyanobacteriia|o__Cyanobacteriales|f__Chroococcidiopsaceae	0	0	0	0.02861	0	0	0	0	0	0	0.01155	0	0	0	0	0	0	0.02633	0	0	0	0	0	0	0	0	0	0	0	0	0	0	0	0.00403	0	0	0	0	0	0	0	0.17736	0.09584	0	0	0	0	0	0
d__Bacteria|p__Cyanobacteria|c__Cyanobacteriia|o__Cyanobacteriales|f__Chroococcidiopsaceae|g__Aliterella	0	0	0	0	0	0	0	0	0	0	0.01155	0	0	0	0	0	0	0	0	0	0	0	0	0	0	0	0	0	0	0	0	0	0	0.00403	0	0	0	0	0	0	0	0	0	0	0	0	0	0	0
d__Bacteria|p__Cyanobacteria|c__Cyanobacteriia|o__Cyanobacteriales|f__Chroococcidiopsaceae|g__Aliterella|s__Aliterella_unclassified	0	0	0	0	0	0	0	0	0	0	0.01155	0	0	0	0	0	0	0	0	0	0	0	0	0	0	0	0	0	0	0	0	0	0	0.00403	0	0	0	0	0	0	0	0	0	0	0	0	0	0	0
d__Bacteria|p__Cyanobacteria|c__Cyanobacteriia|o__Cyanobacteriales|f__Chroococcidiopsaceae|g__Chroococcidiopsaceae_unclassified	0	0	0	0	0	0	0	0	0	0	0	0	0	0	0	0	0	0	0	0	0	0	0	0	0	0	0	0	0	0	0	0	0	0	0	0	0	0	0	0	0	0	0	0	0	0	0	0	0
d__Bacteria|p__Cyanobacteria|c__Cyanobacteriia|o__Cyanobacteriales|f__Chroococcidiopsaceae|g__Chroococcidiopsaceae_unclassified|s__Chroococcidiopsaceae_unclassified	0	0	0	0	0	0	0	0	0	0	0	0	0	0	0	0	0	0	0	0	0	0	0	0	0	0	0	0	0	0	0	0	0	0	0	0	0	0	0	0	0	0	0	0	0	0	0	0	0
d__Bacteria|p__Cyanobacteria|c__Cyanobacteriia|o__Cyanobacteriales|f__Chroococcidiopsaceae|g__Chroococcidiopsis_PCC_7203	0	0	0	0.02861	0	0	0	0	0	0	0	0	0	0	0	0	0	0.02633	0	0	0	0	0	0	0	0	0	0	0	0	0	0	0	0	0	0	0	0	0	0	0	0.17736	0	0	0	0	0	0	0
d__Bacteria|p__Cyanobacteria|c__Cyanobacteriia|o__Cyanobacteriales|f__Chroococcidiopsaceae|g__Chroococcidiopsis_PCC_7203|s__Chroococcidiopsis_PCC_7203_unclassified	0	0	0	0.02861	0	0	0	0	0	0	0	0	0	0	0	0	0	0.02633	0	0	0	0	0	0	0	0	0	0	0	0	0	0	0	0	0	0	0	0	0	0	0	0.17736	0	0	0	0	0	0	0
d__Bacteria|p__Cyanobacteria|c__Cyanobacteriia|o__Cyanobacteriales|f__Chroococcidiopsaceae|g__Chroococcidiopsis_SAG_2023	0	0	0	0	0	0	0	0	0	0	0	0	0	0	0	0	0	0	0	0	0	0	0	0	0	0	0	0	0	0	0	0	0	0	0	0	0	0	0	0	0	0	0.09584	0	0	0	0	0	0
d__Bacteria|p__Cyanobacteria|c__Cyanobacteriia|o__Cyanobacteriales|f__Chroococcidiopsaceae|g__Chroococcidiopsis_SAG_2023|s__Chroococcidiopsis_SAG_2023_unclassified	0	0	0	0	0	0	0	0	0	0	0	0	0	0	0	0	0	0	0	0	0	0	0	0	0	0	0	0	0	0	0	0	0	0	0	0	0	0	0	0	0	0	0.09584	0	0	0	0	0	0
d__Bacteria|p__Cyanobacteria|c__Cyanobacteriia|o__Cyanobacteriales|f__Cyanobacteriales_unclassified	0	0	0	0	0	0	0	0	0	0	0	0	0	0	0	0	0	0	0	0	0	0	0	0	0	0	0	0	0	0	0	0.0028	0	0	0	0	0	0	0	0	0	0	0	0	0	0	0	0	0
d__Bacteria|p__Cyanobacteria|c__Cyanobacteriia|o__Cyanobacteriales|f__Cyanobacteriales_unclassified|g__Cyanobacteriales_unclassified	0	0	0	0	0	0	0	0	0	0	0	0	0	0	0	0	0	0	0	0	0	0	0	0	0	0	0	0	0	0	0	0.0028	0	0	0	0	0	0	0	0	0	0	0	0	0	0	0	0	0
d__Bacteria|p__Cyanobacteria|c__Cyanobacteriia|o__Cyanobacteriales|f__Cyanobacteriales_unclassified|g__Cyanobacteriales_unclassified|s__Cyanobacteriales_unclassified	0	0	0	0	0	0	0	0	0	0	0	0	0	0	0	0	0	0	0	0	0	0	0	0	0	0	0	0	0	0	0	0.0028	0	0	0	0	0	0	0	0	0	0	0	0	0	0	0	0	0
d__Bacteria|p__Cyanobacteria|c__Cyanobacteriia|o__Cyanobacteriales|f__Nostocaceae	0	0	0	0	0	0	0	0.01058	0	0	0	0	0	0	0	0	0	0	0	0	0	0	0	0	0	0	0	0	0	0	0	0	0	0	0.00705	0	0	0	0	0	0	0	0	0	0	0	0	0	0
d__Bacteria|p__Cyanobacteria|c__Cyanobacteriia|o__Cyanobacteriales|f__Nostocaceae|g__Calothrix_PCC-6303	0	0	0	0	0	0	0	0.01058	0	0	0	0	0	0	0	0	0	0	0	0	0	0	0	0	0	0	0	0	0	0	0	0	0	0	0.00705	0	0	0	0	0	0	0	0	0	0	0	0	0	0
d__Bacteria|p__Cyanobacteria|c__Cyanobacteriia|o__Cyanobacteriales|f__Nostocaceae|g__Calothrix_PCC-6303|s__Calothrix_PCC-6303_unclassified	0	0	0	0	0	0	0	0.01058	0	0	0	0	0	0	0	0	0	0	0	0	0	0	0	0	0	0	0	0	0	0	0	0	0	0	0.00705	0	0	0	0	0	0	0	0	0	0	0	0	0	0
d__Bacteria|p__Cyanobacteria|c__Cyanobacteriia|o__Leptolyngbyales	0	0	0	0	0	0	0	0	0.01866	0	0	0	0	0	0	0	0	0	0	0	0	0	0	0	0	0	0	0	0	0	0.04351	0.01682	0	0.00672	0	0	0	0	0	0	0	0.028	0	0	0	0	0	0	0
d__Bacteria|p__Cyanobacteria|c__Cyanobacteriia|o__Leptolyngbyales|f__Leptolyngbyaceae	0	0	0	0	0	0	0	0	0.01866	0	0	0	0	0	0	0	0	0	0	0	0	0	0	0	0	0	0	0	0	0	0.04351	0.01682	0	0.00672	0	0	0	0	0	0	0	0.028	0	0	0	0	0	0	0
d__Bacteria|p__Cyanobacteria|c__Cyanobacteriia|o__Leptolyngbyales|f__Leptolyngbyaceae|g__CENA359	0	0	0	0	0	0	0	0	0	0	0	0	0	0	0	0	0	0	0	0	0	0	0	0	0	0	0	0	0	0	0	0	0	0.00672	0	0	0	0	0	0	0	0	0	0	0	0	0	0	0
d__Bacteria|p__Cyanobacteria|c__Cyanobacteriia|o__Leptolyngbyales|f__Leptolyngbyaceae|g__CENA359|s__CENA359_unclassified	0	0	0	0	0	0	0	0	0	0	0	0	0	0	0	0	0	0	0	0	0	0	0	0	0	0	0	0	0	0	0	0	0	0.00672	0	0	0	0	0	0	0	0	0	0	0	0	0	0	0
d__Bacteria|p__Cyanobacteria|c__Cyanobacteriia|o__Leptolyngbyales|f__Leptolyngbyaceae|g__Leptolyngbya_PCC-6306	0	0	0	0	0	0	0	0	0.01866	0	0	0	0	0	0	0	0	0	0	0	0	0	0	0	0	0	0	0	0	0	0.04351	0.01682	0	0	0	0	0	0	0	0	0	0.028	0	0	0	0	0	0	0
d__Bacteria|p__Cyanobacteria|c__Cyanobacteriia|o__Leptolyngbyales|f__Leptolyngbyaceae|g__Leptolyngbya_PCC-6306|s__Leptolyngbya_PCC-6306_unclassified	0	0	0	0	0	0	0	0	0.01866	0	0	0	0	0	0	0	0	0	0	0	0	0	0	0	0	0	0	0	0	0	0.04351	0.01682	0	0	0	0	0	0	0	0	0	0.028	0	0	0	0	0	0	0
d__Bacteria|p__Cyanobacteria|c__Cyanobacteriia|o__Oxyphotobacteria_Incertae_Sedis	0	0	0	0	0	0	0	0	0	0	0	0	0	0	0	0	0	0	0	0	0	0	0	0	0	0	0	0	0	0	0	0	0	0.00403	0	0	0	0	0	0	0	0	0	0	0	0	0	0	0
d__Bacteria|p__Cyanobacteria|c__Cyanobacteriia|o__Oxyphotobacteria_Incertae_Sedis|f__Unknown_Family	0	0	0	0	0	0	0	0	0	0	0	0	0	0	0	0	0	0	0	0	0	0	0	0	0	0	0	0	0	0	0	0	0	0.00403	0	0	0	0	0	0	0	0	0	0	0	0	0	0	0
d__Bacteria|p__Cyanobacteria|c__Cyanobacteriia|o__Oxyphotobacteria_Incertae_Sedis|f__Unknown_Family|g__Pseudanabaena_NgrPSln22	0	0	0	0	0	0	0	0	0	0	0	0	0	0	0	0	0	0	0	0	0	0	0	0	0	0	0	0	0	0	0	0	0	0.00403	0	0	0	0	0	0	0	0	0	0	0	0	0	0	0
d__Bacteria|p__Cyanobacteria|c__Cyanobacteriia|o__Oxyphotobacteria_Incertae_Sedis|f__Unknown_Family|g__Pseudanabaena_NgrPSln22|s__Pseudanabaena_NgrPSln22_unclassified	0	0	0	0	0	0	0	0	0	0	0	0	0	0	0	0	0	0	0	0	0	0	0	0	0	0	0	0	0	0	0	0	0	0.00403	0	0	0	0	0	0	0	0	0	0	0	0	0	0	0
d__Bacteria|p__Cyanobacteria|c__Vampirivibrionia	0	0	0	0	0	0	0.00653	0	0	0	0	0	0	0	0	0	0.00482	0	0.00344	0	0	0	0	0	0	0	0	0	0	0	0	0	0	0	0	0	0	0	0	0	0	0	0	0	0	0	0	0	0
d__Bacteria|p__Cyanobacteria|c__Vampirivibrionia|o__Gastranaerophilales	0	0	0	0	0	0	0	0	0	0	0	0	0	0	0	0	0.00482	0	0.00344	0	0	0	0	0	0	0	0	0	0	0	0	0	0	0	0	0	0	0	0	0	0	0	0	0	0	0	0	0	0
d__Bacteria|p__Cyanobacteria|c__Vampirivibrionia|o__Gastranaerophilales|f__Gastranaerophilales_unclassified	0	0	0	0	0	0	0	0	0	0	0	0	0	0	0	0	0.00482	0	0.00344	0	0	0	0	0	0	0	0	0	0	0	0	0	0	0	0	0	0	0	0	0	0	0	0	0	0	0	0	0	0
d__Bacteria|p__Cyanobacteria|c__Vampirivibrionia|o__Gastranaerophilales|f__Gastranaerophilales_unclassified|g__Gastranaerophilales_unclassified	0	0	0	0	0	0	0	0	0	0	0	0	0	0	0	0	0.00482	0	0.00344	0	0	0	0	0	0	0	0	0	0	0	0	0	0	0	0	0	0	0	0	0	0	0	0	0	0	0	0	0	0
d__Bacteria|p__Cyanobacteria|c__Vampirivibrionia|o__Gastranaerophilales|f__Gastranaerophilales_unclassified|g__Gastranaerophilales_unclassified|s__Gastranaerophilales_unclassified	0	0	0	0	0	0	0	0	0	0	0	0	0	0	0	0	0.00482	0	0.00344	0	0	0	0	0	0	0	0	0	0	0	0	0	0	0	0	0	0	0	0	0	0	0	0	0	0	0	0	0	0
d__Bacteria|p__Cyanobacteria|c__Vampirivibrionia|o__Obscuribacterales	0	0	0	0	0	0	0.00653	0	0	0	0	0	0	0	0	0	0	0	0	0	0	0	0	0	0	0	0	0	0	0	0	0	0	0	0	0	0	0	0	0	0	0	0	0	0	0	0	0	0
d__Bacteria|p__Cyanobacteria|c__Vampirivibrionia|o__Obscuribacterales|f__Obscuribacteraceae	0	0	0	0	0	0	0.00653	0	0	0	0	0	0	0	0	0	0	0	0	0	0	0	0	0	0	0	0	0	0	0	0	0	0	0	0	0	0	0	0	0	0	0	0	0	0	0	0	0	0
d__Bacteria|p__Cyanobacteria|c__Vampirivibrionia|o__Obscuribacterales|f__Obscuribacteraceae|g__Obscuribacteraceae_unclassified	0	0	0	0	0	0	0.00653	0	0	0	0	0	0	0	0	0	0	0	0	0	0	0	0	0	0	0	0	0	0	0	0	0	0	0	0	0	0	0	0	0	0	0	0	0	0	0	0	0	0
d__Bacteria|p__Cyanobacteria|c__Vampirivibrionia|o__Obscuribacterales|f__Obscuribacteraceae|g__Obscuribacteraceae_unclassified|s__Obscuribacteraceae_unclassified	0	0	0	0	0	0	0.00653	0	0	0	0	0	0	0	0	0	0	0	0	0	0	0	0	0	0	0	0	0	0	0	0	0	0	0	0	0	0	0	0	0	0	0	0	0	0	0	0	0	0
d__Bacteria|p__Deferribacterota	0.03272	0	0	0.02861	0	0	0	0	0	0	0	0	0.00406	0	0	0	0	0	0	0	0	0	0.03156	0	0	0	0	0.00355	0	0	0.00622	0.00841	0	0	0	0	0	0	0	0	0	0	0	0	0.1329	0	0	0	0
d__Bacteria|p__Deferribacterota|c__Deferribacteres	0.03272	0	0	0.02861	0	0	0	0	0	0	0	0	0.00406	0	0	0	0	0	0	0	0	0	0.03156	0	0	0	0	0.00355	0	0	0.00622	0.00841	0	0	0	0	0	0	0	0	0	0	0	0	0.1329	0	0	0	0
d__Bacteria|p__Deferribacterota|c__Deferribacteres|o__Deferribacterales	0.03272	0	0	0.02861	0	0	0	0	0	0	0	0	0.00406	0	0	0	0	0	0	0	0	0	0.03156	0	0	0	0	0.00355	0	0	0.00622	0.00841	0	0	0	0	0	0	0	0	0	0	0	0	0.1329	0	0	0	0
d__Bacteria|p__Deferribacterota|c__Deferribacteres|o__Deferribacterales|f__Deferribacteraceae	0.03272	0	0	0.02861	0	0	0	0	0	0	0	0	0.00406	0	0	0	0	0	0	0	0	0	0.03156	0	0	0	0	0.00355	0	0	0.00622	0.00841	0	0	0	0	0	0	0	0	0	0	0	0	0.1329	0	0	0	0
d__Bacteria|p__Deferribacterota|c__Deferribacteres|o__Deferribacterales|f__Deferribacteraceae|g__Mucispirillum	0.03272	0	0	0.02861	0	0	0	0	0	0	0	0	0.00406	0	0	0	0	0	0	0	0	0	0.03156	0	0	0	0	0.00355	0	0	0.00622	0.00841	0	0	0	0	0	0	0	0	0	0	0	0	0.1329	0	0	0	0
d__Bacteria|p__Deferribacterota|c__Deferribacteres|o__Deferribacterales|f__Deferribacteraceae|g__Mucispirillum|s__Mucispirillum_unclassified	0.03272	0	0	0.02861	0	0	0	0	0	0	0	0	0.00406	0	0	0	0	0	0	0	0	0	0.03156	0	0	0	0	0.00355	0	0	0.00622	0.00841	0	0	0	0	0	0	0	0	0	0	0	0	0.1329	0	0	0	0
d__Bacteria|p__Deinococcota	0.9816	13.3338	0	0	0	0.00765	0	0	0.02544	0.01285	0	0.02694	0	0.00797	0	0	0.04818	0	0	0.0033	0	0.01345	0.0505	0	0	1.07722	0	0	0.07568	0.44557	0	0.81142	0	0	0.00846	0	0	0	0	0.00581	0	0	0	0	0	0	0	0	0
d__Bacteria|p__Deinococcota|c__Deinococci	0.9816	13.3338	0	0	0	0.00765	0	0	0.02544	0.01285	0	0.02694	0	0.00797	0	0	0.04818	0	0	0.0033	0	0.01345	0.0505	0	0	1.07722	0	0	0.07568	0.44557	0	0.81142	0	0	0.00846	0	0	0	0	0.00581	0	0	0	0	0	0	0	0	0
d__Bacteria|p__Deinococcota|c__Deinococci|o__Deinococcales	0.9816	13.3054	0	0	0	0.00765	0	0	0.02544	0.01285	0	0.02694	0	0	0	0	0.04818	0	0	0.0033	0	0	0.0505	0	0	0	0	0	0.07568	0.44557	0	0.81142	0	0	0.00846	0	0	0	0	0.00581	0	0	0	0	0	0	0	0	0
d__Bacteria|p__Deinococcota|c__Deinococci|o__Deinococcales|f__Deinococcaceae	0.9816	13.3054	0	0	0	0.00765	0	0	0.02544	0.01285	0	0.02694	0	0	0	0	0.04818	0	0	0.0033	0	0	0.0505	0	0	0	0	0	0.07568	0.44557	0	0.81142	0	0	0.00846	0	0	0	0	0.00581	0	0	0	0	0	0	0	0	0
d__Bacteria|p__Deinococcota|c__Deinococci|o__Deinococcales|f__Deinococcaceae|g__Deinococcus	0.9816	13.3054	0	0	0	0.00765	0	0	0.02544	0.01285	0	0.02694	0	0	0	0	0.04818	0	0	0.0033	0	0	0.0505	0	0	0	0	0	0.07568	0.44557	0	0.81142	0	0	0.00846	0	0	0	0	0.00581	0	0	0	0	0	0	0	0	0
d__Bacteria|p__Deinococcota|c__Deinococci|o__Deinococcales|f__Deinococcaceae|g__Deinococcus|s__Deinococcus_unclassified	0.9816	13.3054	0	0	0	0.00765	0	0	0.02544	0.01285	0	0.02694	0	0	0	0	0.04818	0	0	0.0033	0	0	0.0505	0	0	0	0	0	0.07568	0.44557	0	0.81142	0	0	0.00846	0	0	0	0	0.00581	0	0	0	0	0	0	0	0	0
d__Bacteria|p__Deinococcota|c__Deinococci|o__Deinococcales|f__Trueperaceae	0	0	0	0	0	0	0	0	0	0	0	0	0	0	0	0	0	0	0	0	0	0	0	0	0	0	0	0	0	0	0	0	0	0	0	0	0	0	0	0	0	0	0	0	0	0	0	0	0
d__Bacteria|p__Deinococcota|c__Deinococci|o__Deinococcales|f__Trueperaceae|g__Truepera	0	0	0	0	0	0	0	0	0	0	0	0	0	0	0	0	0	0	0	0	0	0	0	0	0	0	0	0	0	0	0	0	0	0	0	0	0	0	0	0	0	0	0	0	0	0	0	0	0
d__Bacteria|p__Deinococcota|c__Deinococci|o__Deinococcales|f__Trueperaceae|g__Truepera|s__Truepera_unclassified	0	0	0	0	0	0	0	0	0	0	0	0	0	0	0	0	0	0	0	0	0	0	0	0	0	0	0	0	0	0	0	0	0	0	0	0	0	0	0	0	0	0	0	0	0	0	0	0	0
d__Bacteria|p__Deinococcota|c__Deinococci|o__Thermales	0	0.02838	0	0	0	0	0	0	0	0	0	0	0	0.00797	0	0	0	0	0	0	0	0.01345	0	0	0	1.07722	0	0	0	0	0	0	0	0	0	0	0	0	0	0	0	0	0	0	0	0	0	0	0
d__Bacteria|p__Deinococcota|c__Deinococci|o__Thermales|f__Thermaceae	0	0.02838	0	0	0	0	0	0	0	0	0	0	0	0.00797	0	0	0	0	0	0	0	0.01345	0	0	0	1.07722	0	0	0	0	0	0	0	0	0	0	0	0	0	0	0	0	0	0	0	0	0	0	0
d__Bacteria|p__Deinococcota|c__Deinococci|o__Thermales|f__Thermaceae|g__Meiothermus	0	0	0	0	0	0	0	0	0	0	0	0	0	0.00797	0	0	0	0	0	0	0	0.01345	0	0	0	0	0	0	0	0	0	0	0	0	0	0	0	0	0	0	0	0	0	0	0	0	0	0	0
d__Bacteria|p__Deinococcota|c__Deinococci|o__Thermales|f__Thermaceae|g__Meiothermus|s__Meiothermus_unclassified	0	0	0	0	0	0	0	0	0	0	0	0	0	0.00797	0	0	0	0	0	0	0	0.01345	0	0	0	0	0	0	0	0	0	0	0	0	0	0	0	0	0	0	0	0	0	0	0	0	0	0	0
d__Bacteria|p__Deinococcota|c__Deinococci|o__Thermales|f__Thermaceae|g__Thermus	0	0.02838	0	0	0	0	0	0	0	0	0	0	0	0	0	0	0	0	0	0	0	0	0	0	0	1.07722	0	0	0	0	0	0	0	0	0	0	0	0	0	0	0	0	0	0	0	0	0	0	0
d__Bacteria|p__Deinococcota|c__Deinococci|o__Thermales|f__Thermaceae|g__Thermus|s__Thermus_unclassified	0	0.02838	0	0	0	0	0	0	0	0	0	0	0	0	0	0	0	0	0	0	0	0	0	0	0	1.07722	0	0	0	0	0	0	0	0	0	0	0	0	0	0	0	0	0	0	0	0	0	0	0
d__Bacteria|p__Desulfobacterota	0.0818	0.07096	0.06812	0.85843	0.05493	0.15766	0.00326	0	0.26632	0.35974	6.88712	5.42834	5.68478	3.55749	1.11623	0.84556	0.99005	1.58873	0.48111	1.92672	0.29027	0.13278	0.08838	0.14317	0.25418	0.07047	0.01296	0.02486	0	0.01161	0.23466	0.0042	0.01437	0	0.40029	0.19033	0.17579	0.09237	0	0.00581	0	0	0.01681	0.01207	0.93028	0.00779	0.12468	0.20431	0.14017
d__Bacteria|p__Desulfobacterota|c__Desulfobacterota_unclassified	0	0.02838	0	0	0	0	0	0	0	0	0	0	0	0	0	0	0	0	0	0	0	0	0	0	0	0	0	0	0	0	0	0	0	0	0	0	0	0	0	0	0	0	0	0	0	0	0	0	0
d__Bacteria|p__Desulfobacterota|c__Desulfobacterota_unclassified|o__Desulfobacterota_unclassified	0	0.02838	0	0	0	0	0	0	0	0	0	0	0	0	0	0	0	0	0	0	0	0	0	0	0	0	0	0	0	0	0	0	0	0	0	0	0	0	0	0	0	0	0	0	0	0	0	0	0
d__Bacteria|p__Desulfobacterota|c__Desulfobacterota_unclassified|o__Desulfobacterota_unclassified|f__Desulfobacterota_unclassified	0	0.02838	0	0	0	0	0	0	0	0	0	0	0	0	0	0	0	0	0	0	0	0	0	0	0	0	0	0	0	0	0	0	0	0	0	0	0	0	0	0	0	0	0	0	0	0	0	0	0
d__Bacteria|p__Desulfobacterota|c__Desulfobacterota_unclassified|o__Desulfobacterota_unclassified|f__Desulfobacterota_unclassified|g__Desulfobacterota_unclassified	0	0.02838	0	0	0	0	0	0	0	0	0	0	0	0	0	0	0	0	0	0	0	0	0	0	0	0	0	0	0	0	0	0	0	0	0	0	0	0	0	0	0	0	0	0	0	0	0	0	0
d__Bacteria|p__Desulfobacterota|c__Desulfobacterota_unclassified|o__Desulfobacterota_unclassified|f__Desulfobacterota_unclassified|g__Desulfobacterota_unclassified|s__Desulfobacterota_unclassified	0	0.02838	0	0	0	0	0	0	0	0	0	0	0	0	0	0	0	0	0	0	0	0	0	0	0	0	0	0	0	0	0	0	0	0	0	0	0	0	0	0	0	0	0	0	0	0	0	0	0
d__Bacteria|p__Desulfobacterota|c__Desulfovibrionia	0.0818	0.04258	0.06812	0.85843	0.05493	0.15766	0.00326	0	0.26632	0.35974	6.88712	5.42834	5.68478	3.55749	1.11623	0.84556	0.99005	1.58873	0.48111	1.92672	0.29027	0.13278	0.08838	0.14317	0.25418	0.07047	0.01296	0.02486	0	0.01161	0.23466	0.0042	0.01437	0	0.40029	0.19033	0.17579	0.09237	0	0.00581	0	0	0.01681	0.01207	0.93028	0.00779	0.12468	0.20431	0.14017
d__Bacteria|p__Desulfobacterota|c__Desulfovibrionia|o__Desulfovibrionales	0.0818	0.04258	0.06812	0.85843	0.05493	0.15766	0.00326	0	0.26632	0.35974	6.88712	5.42834	5.68478	3.55749	1.11623	0.84556	0.99005	1.58873	0.48111	1.92672	0.29027	0.13278	0.08838	0.14317	0.25418	0.07047	0.01296	0.02486	0	0.01161	0.23466	0.0042	0.01437	0	0.40029	0.19033	0.17579	0.09237	0	0.00581	0	0	0.01681	0.01207	0.93028	0.00779	0.12468	0.20431	0.14017
d__Bacteria|p__Desulfobacterota|c__Desulfovibrionia|o__Desulfovibrionales|f__Desulfovibrionaceae	0.0818	0.04258	0.06812	0.85843	0.05493	0.15766	0.00326	0	0.26632	0.35974	6.88712	5.42834	5.68478	3.55749	1.11623	0.84556	0.99005	1.58873	0.48111	1.92672	0.29027	0.13278	0.08838	0.14317	0.25418	0.07047	0.01296	0.02486	0	0.01161	0.23466	0.0042	0.01437	0	0.40029	0.19033	0.17579	0.09237	0	0.00581	0	0	0.01681	0.01207	0.93028	0.00779	0.12468	0.20431	0.14017
d__Bacteria|p__Desulfobacterota|c__Desulfovibrionia|o__Desulfovibrionales|f__Desulfovibrionaceae|g__Bilophila	0	0	0.06812	0.66528	0.05493	0.15307	0	0	0.22561	0.25329	0.40037	0.20397	0.33488	0.22309	0.86428	0.57695	0.99005	1.58873	0.48111	1.83757	0.29027	0.13278	0.01263	0.12461	0.25418	0	0.01296	0.02486	0	0	0.02953	0	0	0	0.34391	0.15325	0.1351	0.04697	0	0	0	0	0.01681	0	0.00871	0	0.12468	0.20431	0.14017
d__Bacteria|p__Desulfobacterota|c__Desulfovibrionia|o__Desulfovibrionales|f__Desulfovibrionaceae|g__Bilophila|s__Bilophila_unclassified	0	0	0.06812	0.66528	0.05493	0.15307	0	0	0.22561	0.25329	0.40037	0.20397	0.33488	0.22309	0.86428	0.57695	0.99005	1.58873	0.48111	1.83757	0.29027	0.13278	0.01263	0.12461	0.25418	0	0.01296	0.02486	0	0	0.02953	0	0	0	0.34391	0.15325	0.1351	0.04697	0	0	0	0	0.01681	0	0.00871	0	0.12468	0.20431	0.14017
d__Bacteria|p__Desulfobacterota|c__Desulfovibrionia|o__Desulfovibrionales|f__Desulfovibrionaceae|g__Desulfovibrio	0	0	0	0.19315	0	0	0	0	0.04071	0.10645	6.13258	4.78179	4.8831	3.18899	0.24717	0.26861	0	0	0	0.08915	0	0	0	0	0	0	0	0	0	0	0.18337	0	0.01437	0	0.05638	0.00989	0.03418	0.03914	0	0	0	0	0	0.00268	0	0	0	0	0
d__Bacteria|p__Desulfobacterota|c__Desulfovibrionia|o__Desulfovibrionales|f__Desulfovibrionaceae|g__Desulfovibrionaceae_unclassified	0.0818	0.04258	0	0	0	0.00459	0.00326	0	0	0	0	0.00577	0	0.00996	0.00478	0	0	0	0	0	0	0	0.07575	0.01856	0	0.07047	0	0	0	0.01161	0.02176	0.0042	0	0	0	0.02719	0.00651	0.00626	0	0.00581	0	0	0	0.00939	0.92157	0.00779	0	0	0
d__Bacteria|p__Desulfobacterota|c__Desulfovibrionia|o__Desulfovibrionales|f__Desulfovibrionaceae|g__Desulfovibrionaceae_unclassified|s__Desulfovibrionaceae_unclassified	0.0818	0.04258	0	0	0	0.00459	0.00326	0	0	0	0	0.00577	0	0.00996	0.00478	0	0	0	0	0	0	0	0.07575	0.01856	0	0.07047	0	0	0	0.01161	0.02176	0.0042	0	0	0	0.02719	0.00651	0.00626	0	0.00581	0	0	0	0.00939	0.92157	0.00779	0	0	0
d__Bacteria|p__Desulfobacterota|c__Desulfovibrionia|o__Desulfovibrionales|f__Desulfovibrionaceae|g__Desulfovibrio|s__Desulfovibrio_unclassified	0	0	0	0.19315	0	0	0	0	0.04071	0.10645	6.13258	4.78179	4.8831	3.18899	0.24717	0.26861	0	0	0	0.08915	0	0	0	0	0	0	0	0	0	0	0.18337	0	0.01437	0	0.05638	0.00989	0.03418	0.03914	0	0	0	0	0	0.00268	0	0	0	0	0
d__Bacteria|p__Desulfobacterota|c__Desulfovibrionia|o__Desulfovibrionales|f__Desulfovibrionaceae|g__Mailhella	0	0	0	0	0	0	0	0	0	0	0.35417	0.43681	0.4668	0.13545	0	0	0	0	0	0	0	0	0	0	0	0	0	0	0	0	0	0	0	0	0	0	0	0	0	0	0	0	0	0	0	0	0	0	0
d__Bacteria|p__Desulfobacterota|c__Desulfovibrionia|o__Desulfovibrionales|f__Desulfovibrionaceae|g__Mailhella|s__Mailhella_unclassified	0	0	0	0	0	0	0	0	0	0	0.35417	0.43681	0.4668	0.13545	0	0	0	0	0	0	0	0	0	0	0	0	0	0	0	0	0	0	0	0	0	0	0	0	0	0	0	0	0	0	0	0	0	0	0
d__Bacteria|p__Desulfobacterota|c__Syntrophia	0	0	0	0	0	0	0	0	0	0	0	0	0	0	0	0	0	0	0	0	0	0	0	0	0	0	0	0	0	0	0	0	0	0	0	0	0	0	0	0	0	0	0	0	0	0	0	0	0
d__Bacteria|p__Desulfobacterota|c__Syntrophia|o__Syntrophales	0	0	0	0	0	0	0	0	0	0	0	0	0	0	0	0	0	0	0	0	0	0	0	0	0	0	0	0	0	0	0	0	0	0	0	0	0	0	0	0	0	0	0	0	0	0	0	0	0
d__Bacteria|p__Desulfobacterota|c__Syntrophia|o__Syntrophales|f__Smithellaceae	0	0	0	0	0	0	0	0	0	0	0	0	0	0	0	0	0	0	0	0	0	0	0	0	0	0	0	0	0	0	0	0	0	0	0	0	0	0	0	0	0	0	0	0	0	0	0	0	0
d__Bacteria|p__Desulfobacterota|c__Syntrophia|o__Syntrophales|f__Smithellaceae|g__Smithella	0	0	0	0	0	0	0	0	0	0	0	0	0	0	0	0	0	0	0	0	0	0	0	0	0	0	0	0	0	0	0	0	0	0	0	0	0	0	0	0	0	0	0	0	0	0	0	0	0
d__Bacteria|p__Desulfobacterota|c__Syntrophia|o__Syntrophales|f__Smithellaceae|g__Smithella|s__Smithella_unclassified	0	0	0	0	0	0	0	0	0	0	0	0	0	0	0	0	0	0	0	0	0	0	0	0	0	0	0	0	0	0	0	0	0	0	0	0	0	0	0	0	0	0	0	0	0	0	0	0	0
d__Bacteria|p__Elusimicrobiota	0	0	0	0	0	0	0	0	0	0	0	0	0.01015	0	0	0	0	0	0	0	0	0	0	0	0	0	0	0	0	0	0	0	0	0	0	0	0	0	0	0	0	0	0.00673	0	0	0	0	0	0
d__Bacteria|p__Elusimicrobiota|c__Endomicrobia	0	0	0	0	0	0	0	0	0	0	0	0	0.01015	0	0	0	0	0	0	0	0	0	0	0	0	0	0	0	0	0	0	0	0	0	0	0	0	0	0	0	0	0	0	0	0	0	0	0	0
d__Bacteria|p__Elusimicrobiota|c__Endomicrobia|o__Endomicrobiales	0	0	0	0	0	0	0	0	0	0	0	0	0.01015	0	0	0	0	0	0	0	0	0	0	0	0	0	0	0	0	0	0	0	0	0	0	0	0	0	0	0	0	0	0	0	0	0	0	0	0
d__Bacteria|p__Elusimicrobiota|c__Endomicrobia|o__Endomicrobiales|f__Endomicrobiaceae	0	0	0	0	0	0	0	0	0	0	0	0	0.01015	0	0	0	0	0	0	0	0	0	0	0	0	0	0	0	0	0	0	0	0	0	0	0	0	0	0	0	0	0	0	0	0	0	0	0	0
d__Bacteria|p__Elusimicrobiota|c__Endomicrobia|o__Endomicrobiales|f__Endomicrobiaceae|g__Endomicrobium	0	0	0	0	0	0	0	0	0	0	0	0	0.01015	0	0	0	0	0	0	0	0	0	0	0	0	0	0	0	0	0	0	0	0	0	0	0	0	0	0	0	0	0	0	0	0	0	0	0	0
d__Bacteria|p__Elusimicrobiota|c__Endomicrobia|o__Endomicrobiales|f__Endomicrobiaceae|g__Endomicrobium|s__Endomicrobium_unclassified	0	0	0	0	0	0	0	0	0	0	0	0	0.01015	0	0	0	0	0	0	0	0	0	0	0	0	0	0	0	0	0	0	0	0	0	0	0	0	0	0	0	0	0	0	0	0	0	0	0	0
d__Bacteria|p__Elusimicrobiota|c__Lineage_IIb	0	0	0	0	0	0	0	0	0	0	0	0	0	0	0	0	0	0	0	0	0	0	0	0	0	0	0	0	0	0	0	0	0	0	0	0	0	0	0	0	0	0	0.00673	0	0	0	0	0	0
d__Bacteria|p__Elusimicrobiota|c__Lineage_IIb|o__Lineage_IIb_unclassified	0	0	0	0	0	0	0	0	0	0	0	0	0	0	0	0	0	0	0	0	0	0	0	0	0	0	0	0	0	0	0	0	0	0	0	0	0	0	0	0	0	0	0.00673	0	0	0	0	0	0
d__Bacteria|p__Elusimicrobiota|c__Lineage_IIb|o__Lineage_IIb_unclassified|f__Lineage_IIb_unclassified	0	0	0	0	0	0	0	0	0	0	0	0	0	0	0	0	0	0	0	0	0	0	0	0	0	0	0	0	0	0	0	0	0	0	0	0	0	0	0	0	0	0	0.00673	0	0	0	0	0	0
d__Bacteria|p__Elusimicrobiota|c__Lineage_IIb|o__Lineage_IIb_unclassified|f__Lineage_IIb_unclassified|g__Lineage_IIb_unclassified	0	0	0	0	0	0	0	0	0	0	0	0	0	0	0	0	0	0	0	0	0	0	0	0	0	0	0	0	0	0	0	0	0	0	0	0	0	0	0	0	0	0	0.00673	0	0	0	0	0	0
d__Bacteria|p__Elusimicrobiota|c__Lineage_IIb|o__Lineage_IIb_unclassified|f__Lineage_IIb_unclassified|g__Lineage_IIb_unclassified|s__Lineage_IIb_unclassified	0	0	0	0	0	0	0	0	0	0	0	0	0	0	0	0	0	0	0	0	0	0	0	0	0	0	0	0	0	0	0	0	0	0	0	0	0	0	0	0	0	0	0.00673	0	0	0	0	0	0
d__Bacteria|p__FCPU426	0	0	0	0	0	0	0	0	0	0	0	0	0	0	0	0	0	0	0	0	0.01519	0	0	0	0	0	0	0	0	0	0	0	0	0	0	0	0	0	0	0	0	0	0	0	0	0	0	0	0
d__Bacteria|p__FCPU426|c__FCPU426_unclassified	0	0	0	0	0	0	0	0	0	0	0	0	0	0	0	0	0	0	0	0	0.01519	0	0	0	0	0	0	0	0	0	0	0	0	0	0	0	0	0	0	0	0	0	0	0	0	0	0	0	0
d__Bacteria|p__FCPU426|c__FCPU426_unclassified|o__FCPU426_unclassified	0	0	0	0	0	0	0	0	0	0	0	0	0	0	0	0	0	0	0	0	0.01519	0	0	0	0	0	0	0	0	0	0	0	0	0	0	0	0	0	0	0	0	0	0	0	0	0	0	0	0
d__Bacteria|p__FCPU426|c__FCPU426_unclassified|o__FCPU426_unclassified|f__FCPU426_unclassified	0	0	0	0	0	0	0	0	0	0	0	0	0	0	0	0	0	0	0	0	0.01519	0	0	0	0	0	0	0	0	0	0	0	0	0	0	0	0	0	0	0	0	0	0	0	0	0	0	0	0
d__Bacteria|p__FCPU426|c__FCPU426_unclassified|o__FCPU426_unclassified|f__FCPU426_unclassified|g__FCPU426_unclassified	0	0	0	0	0	0	0	0	0	0	0	0	0	0	0	0	0	0	0	0	0.01519	0	0	0	0	0	0	0	0	0	0	0	0	0	0	0	0	0	0	0	0	0	0	0	0	0	0	0	0
d__Bacteria|p__FCPU426|c__FCPU426_unclassified|o__FCPU426_unclassified|f__FCPU426_unclassified|g__FCPU426_unclassified|s__FCPU426_unclassified	0	0	0	0	0	0	0	0	0	0	0	0	0	0	0	0	0	0	0	0	0.01519	0	0	0	0	0	0	0	0	0	0	0	0	0	0	0	0	0	0	0	0	0	0	0	0	0	0	0	0
d__Bacteria|p__Fibrobacterota	0	0	0	0	0	0	0	0	0	0	0	0	0	0	0	0	0	0	0	0	0	0	0	0	0	0	0	0	0	0	0	0	0.00479	0	0	0	0	0	0	0	0	0.014	0	0.00403	0	0	0	0	0
d__Bacteria|p__Fibrobacterota|c__Fibrobacteria	0	0	0	0	0	0	0	0	0	0	0	0	0	0	0	0	0	0	0	0	0	0	0	0	0	0	0	0	0	0	0	0	0.00479	0	0	0	0	0	0	0	0	0.014	0	0.00403	0	0	0	0	0
d__Bacteria|p__Fibrobacterota|c__Fibrobacteria|o__Fibrobacterales	0	0	0	0	0	0	0	0	0	0	0	0	0	0	0	0	0	0	0	0	0	0	0	0	0	0	0	0	0	0	0	0	0.00479	0	0	0	0	0	0	0	0	0.014	0	0.00403	0	0	0	0	0
d__Bacteria|p__Fibrobacterota|c__Fibrobacteria|o__Fibrobacterales|f__Fibrobacterales_unclassified	0	0	0	0	0	0	0	0	0	0	0	0	0	0	0	0	0	0	0	0	0	0	0	0	0	0	0	0	0	0	0	0	0.00479	0	0	0	0	0	0	0	0	0.014	0	0.00403	0	0	0	0	0
d__Bacteria|p__Fibrobacterota|c__Fibrobacteria|o__Fibrobacterales|f__Fibrobacterales_unclassified|g__Fibrobacterales_unclassified	0	0	0	0	0	0	0	0	0	0	0	0	0	0	0	0	0	0	0	0	0	0	0	0	0	0	0	0	0	0	0	0	0.00479	0	0	0	0	0	0	0	0	0.014	0	0.00403	0	0	0	0	0
d__Bacteria|p__Fibrobacterota|c__Fibrobacteria|o__Fibrobacterales|f__Fibrobacterales_unclassified|g__Fibrobacterales_unclassified|s__Fibrobacterales_unclassified	0	0	0	0	0	0	0	0	0	0	0	0	0	0	0	0	0	0	0	0	0	0	0	0	0	0	0	0	0	0	0	0	0.00479	0	0	0	0	0	0	0	0	0.014	0	0.00403	0	0	0	0	0
d__Bacteria|p__Firmicutes	26.5522	17.3787	24.1378	23.5282	15.7966	10.8602	5.32028	5.16714	15.0718	12.6386	39.4172	44.7602	35.9068	33.9973	34.9412	45.7949	48.5896	41.8775	24.9076	31.2668	9.85233	12.9195	27.1889	15.6579	16.4735	13.3696	20.7424	19.8575	13.6035	17.0085	32.6231	47.2281	12.9399	2.15262	2.03105	4.92632	30.5694	40.429	8.03839	0.48835	2.07294	6.73977	22.2997	20.5713	15.7386	15.347	13.5037	15.2351	13.3582
d__Bacteria|p__Firmicutes|c__Bacilli	7.9673	5.6557	3.72682	4.285	0.06556	0.04745	1.57815	1.21811	0.85833	0.63323	0.86426	1.30079	1.06145	1.00989	1.43354	1.34875	2.24026	0.54858	0.56874	0.86182	0.27339	0.53277	17.1959	8.64286	2.8688	7.31905	9.50949	3.77935	3.37156	2.93321	3.82129	5.25114	4.70541	0.23932	0.47076	0.56358	0.77157	1.09441	5.47646	0.26743	0.51544	2.55776	19.0984	18.0932	0.35731	2.53757	1.10217	1.61242	1.17812
d__Bacteria|p__Firmicutes|c__Bacilli|o__Alicyclobacillales	0	0	0	0	0	0	0	0	0	0	0	0	0	0	0	0	0	0	0	0	0	0	0	0	0	0	0	0	0	0	0	0	0	0	0	0	0	0	0	0	0	0	0.01177	0	0	0	0	0	0
d__Bacteria|p__Firmicutes|c__Bacilli|o__Alicyclobacillales|f__Alicyclobacillaceae	0	0	0	0	0	0	0	0	0	0	0	0	0	0	0	0	0	0	0	0	0	0	0	0	0	0	0	0	0	0	0	0	0	0	0	0	0	0	0	0	0	0	0.01177	0	0	0	0	0	0
d__Bacteria|p__Firmicutes|c__Bacilli|o__Alicyclobacillales|f__Alicyclobacillaceae|g__Tumebacillus	0	0	0	0	0	0	0	0	0	0	0	0	0	0	0	0	0	0	0	0	0	0	0	0	0	0	0	0	0	0	0	0	0	0	0	0	0	0	0	0	0	0	0.01177	0	0	0	0	0	0
d__Bacteria|p__Firmicutes|c__Bacilli|o__Alicyclobacillales|f__Alicyclobacillaceae|g__Tumebacillus|s__Tumebacillus_unclassified	0	0	0	0	0	0	0	0	0	0	0	0	0	0	0	0	0	0	0	0	0	0	0	0	0	0	0	0	0	0	0	0	0	0	0	0	0	0	0	0	0	0	0.01177	0	0	0	0	0	0
d__Bacteria|p__Firmicutes|c__Bacilli|o__Bacillales	0.62986	0.06387	0.34912	0.32907	0	0	0	0.00906	0	0.02202	0	0.01155	0.00609	0	0.01435	0	0.91297	0	0.02234	0.0033	0	0	0.2967	0.5541	0.06221	3.14105	0.02016	0.58431	0.13432	0.62844	0.03885	0.01682	0.01596	0.09546	0	0.06427	0.00326	0	0.33968	0.03779	0.0418	1.09685	0.28751	0	0	0	0.01829	0.34513	0.02503
d__Bacteria|p__Firmicutes|c__Bacilli|o__Bacillales|f__Bacillaceae	0.62986	0.06387	0.34912	0.32907	0	0	0	0.00906	0	0.02202	0	0.01155	0.00609	0	0.01435	0	0.91297	0	0.02234	0.0033	0	0	0.2967	0.5541	0.06221	3.14105	0.02016	0.58431	0.13432	0.62844	0.03885	0.01682	0	0.09546	0	0.06427	0.00326	0	0.33968	0.03779	0.0418	1.09685	0.2438	0	0	0	0.01829	0.34513	0.02503
d__Bacteria|p__Firmicutes|c__Bacilli|o__Bacillales|f__Bacillaceae|g__Aeribacillus	0.62986	0.06387	0.10502	0.07869	0	0	0	0.00453	0	0	0	0.01155	0.00609	0	0	0	0.02168	0	0	0.0033	0	0	0.2967	0	0.03022	0.78526	0	0.06749	0.08892	0.28737	0	0.01682	0	0	0	0.03955	0.00326	0	0.05186	0.01744	0.02508	1.09685	0.04203	0	0	0	0.01829	0.12977	0.02503
d__Bacteria|p__Firmicutes|c__Bacilli|o__Bacillales|f__Bacillaceae|g__Aeribacillus|s__Aeribacillus_pallidus	0	0.06387	0.10502	0.07869	0	0	0	0	0	0	0	0.01155	0	0	0	0	0.02168	0	0	0.0033	0	0	0	0	0	0.24162	0	0.06749	0.08892	0	0	0	0	0	0	0.03955	0.00326	0	0.05186	0.01744	0	0	0	0	0	0	0.01829	0	0.02503
d__Bacteria|p__Firmicutes|c__Bacilli|o__Bacillales|f__Bacillaceae|g__Aeribacillus|s__Aeribacillus_unclassified	0.62986	0	0	0	0	0	0	0.00453	0	0	0	0	0.00609	0	0	0	0	0	0	0	0	0	0.2967	0	0.03022	0.54364	0	0	0	0.28737	0	0.01682	0	0	0	0	0	0	0	0	0.02508	1.09685	0.04203	0	0	0	0	0.12977	0
d__Bacteria|p__Firmicutes|c__Bacilli|o__Bacillales|f__Bacillaceae|g__Anoxybacillus	0	0	0	0	0	0	0	0	0	0	0	0	0	0	0	0	0	0	0	0	0	0	0	0	0	0	0	0.00888	0	0	0	0	0	0.00403	0	0	0	0	0	0	0	0	0	0	0	0	0	0	0
d__Bacteria|p__Firmicutes|c__Bacilli|o__Bacillales|f__Bacillaceae|g__Anoxybacillus|s__Anoxybacillus_flavithermus	0	0	0	0	0	0	0	0	0	0	0	0	0	0	0	0	0	0	0	0	0	0	0	0	0	0	0	0.00888	0	0	0	0	0	0	0	0	0	0	0	0	0	0	0	0	0	0	0	0	0
d__Bacteria|p__Firmicutes|c__Bacilli|o__Bacillales|f__Bacillaceae|g__Anoxybacillus|s__Anoxybacillus_toebii	0	0	0	0	0	0	0	0	0	0	0	0	0	0	0	0	0	0	0	0	0	0	0	0	0	0	0	0	0	0	0	0	0	0.00403	0	0	0	0	0	0	0	0	0	0	0	0	0	0	0
d__Bacteria|p__Firmicutes|c__Bacilli|o__Bacillales|f__Bacillaceae|g__Bacillaceae_unclassified	0	0	0	0	0	0	0	0	0	0	0	0	0	0	0	0	0	0	0	0	0	0	0	0.24391	0	0	0	0	0	0	0	0	0	0.0121	0	0	0	0	0	0	0	0	0	0	0	0	0	0	0
d__Bacteria|p__Firmicutes|c__Bacilli|o__Bacillales|f__Bacillaceae|g__Bacillaceae_unclassified|s__Bacillaceae_unclassified	0	0	0	0	0	0	0	0	0	0	0	0	0	0	0	0	0	0	0	0	0	0	0	0.24391	0	0	0	0	0	0	0	0	0	0.0121	0	0	0	0	0	0	0	0	0	0	0	0	0	0	0
d__Bacteria|p__Firmicutes|c__Bacilli|o__Bacillales|f__Bacillaceae|g__Bacillus	0	0	0.2441	0.25038	0	0	0	0.00453	0	0.01101	0	0	0	0	0.00478	0	0.1903	0	0	0	0	0	0	0.01326	0.03199	2.35579	0.02016	0.50794	0	0.34107	0.03885	0	0	0.07395	0	0.02472	0	0	0.21262	0	0.01672	0	0.11265	0	0	0	0	0.21536	0
d__Bacteria|p__Firmicutes|c__Bacilli|o__Bacillales|f__Bacillaceae|g__Bacillus|s__Bacillus_humi	0	0	0.2441	0	0	0	0	0	0	0	0	0	0	0	0	0	0	0	0	0	0	0	0	0	0	0	0	0	0	0	0	0	0	0	0	0	0	0	0	0	0	0	0	0	0	0	0	0	0
d__Bacteria|p__Firmicutes|c__Bacilli|o__Bacillales|f__Bacillaceae|g__Bacillus|s__Bacillus_kokeshiiformis	0	0	0	0	0	0	0	0	0	0	0	0	0	0	0	0	0	0	0	0	0	0	0	0	0	0	0	0	0	0	0	0	0	0	0	0	0	0	0	0	0.01672	0	0	0	0	0	0	0	0
d__Bacteria|p__Firmicutes|c__Bacilli|o__Bacillales|f__Bacillaceae|g__Bacillus|s__Bacillus_pumilus	0	0	0	0.23607	0	0	0	0	0	0	0	0	0	0	0	0	0	0	0	0	0	0	0	0	0.03199	0	0	0	0	0	0	0	0	0	0	0	0	0	0	0	0	0	0	0	0	0	0	0	0
d__Bacteria|p__Firmicutes|c__Bacilli|o__Bacillales|f__Bacillaceae|g__Bacillus|s__Bacillus_shackletonii	0	0	0	0.01431	0	0	0	0	0	0	0	0	0	0	0	0	0	0	0	0	0	0	0	0	0	0	0	0	0	0	0	0	0	0	0	0	0	0	0	0	0	0	0	0	0	0	0	0	0
d__Bacteria|p__Firmicutes|c__Bacilli|o__Bacillales|f__Bacillaceae|g__Bacillus|s__Bacillus_simplex	0	0	0	0	0	0	0	0	0	0	0	0	0	0	0	0	0	0	0	0	0	0	0	0	0	0	0	0	0	0	0	0	0	0	0	0	0	0	0	0	0	0	0	0	0	0	0	0	0
d__Bacteria|p__Firmicutes|c__Bacilli|o__Bacillales|f__Bacillaceae|g__Bacillus|s__Bacillus_sp._(in:_Bacteria)	0	0	0	0	0	0	0	0	0	0	0	0	0	0	0	0	0	0	0	0	0	0	0	0.01326	0	0	0	0	0	0	0	0	0	0	0	0	0	0	0	0	0	0	0.00504	0	0	0	0	0	0
d__Bacteria|p__Firmicutes|c__Bacilli|o__Bacillales|f__Bacillaceae|g__Bacillus|s__Bacillus_sp._BLG74	0	0	0	0	0	0	0	0	0	0	0	0	0	0	0	0	0.02168	0	0	0	0	0	0	0	0	0	0	0	0	0	0	0	0	0.00941	0	0	0	0	0.19188	0	0	0	0	0	0	0	0	0	0
d__Bacteria|p__Firmicutes|c__Bacilli|o__Bacillales|f__Bacillaceae|g__Bacillus|s__Bacillus_sp._BO7	0	0	0	0	0	0	0	0	0	0	0	0	0	0	0.00478	0	0	0	0	0	0	0	0	0	0	0	0	0	0	0	0	0	0	0.06454	0	0	0	0	0	0	0	0	0	0	0	0	0	0	0
d__Bacteria|p__Firmicutes|c__Bacilli|o__Bacillales|f__Bacillaceae|g__Bacillus|s__Bacillus_sp._DF12	0	0	0	0	0	0	0	0	0	0	0	0	0	0	0	0	0	0	0	0	0	0	0	0	0	0	0.02016	0	0	0	0.03885	0	0	0	0	0	0	0	0	0	0	0	0	0	0	0	0	0	0
d__Bacteria|p__Firmicutes|c__Bacilli|o__Bacillales|f__Bacillaceae|g__Bacillus|s__Bacillus_sp._H3(2011)	0	0	0	0	0	0	0	0	0	0	0	0	0	0	0	0	0	0	0	0	0	0	0	0	0	0	0	0	0	0	0	0	0	0	0	0	0	0	0	0	0	0	0	0	0	0	0	0	0
d__Bacteria|p__Firmicutes|c__Bacilli|o__Bacillales|f__Bacillaceae|g__Bacillus|s__Bacillus_sp._IDA4921	0	0	0	0	0	0	0	0	0	0	0	0	0	0	0	0	0	0	0	0	0	0	0	0	0	0	0	0	0	0	0	0	0	0	0	0.02472	0	0	0	0	0	0	0	0	0	0	0	0	0
d__Bacteria|p__Firmicutes|c__Bacilli|o__Bacillales|f__Bacillaceae|g__Bacillus|s__Bacillus_sp._KC2(2011)	0	0	0	0	0	0	0	0	0	0	0	0	0	0	0	0	0	0	0	0	0	0	0	0	0	0	0	0	0	0	0	0	0	0	0	0	0	0	0	0	0	0	0.10761	0	0	0	0	0	0
d__Bacteria|p__Firmicutes|c__Bacilli|o__Bacillales|f__Bacillaceae|g__Bacillus|s__Bacillus_sp._KP055r	0	0	0	0	0	0	0	0	0	0	0	0	0	0	0	0	0	0	0	0	0	0	0	0	0	0	0	0	0	0	0	0	0	0	0	0	0	0	0	0	0	0	0	0	0	0	0	0.21536	0
d__Bacteria|p__Firmicutes|c__Bacilli|o__Bacillales|f__Bacillaceae|g__Bacillus|s__Bacillus_sp._MSP06G	0	0	0	0	0	0	0	0	0	0	0	0	0	0	0	0	0.16862	0	0	0	0	0	0	0	0	0	0	0	0	0	0	0	0	0	0	0	0	0	0	0	0	0	0	0	0	0	0	0	0
d__Bacteria|p__Firmicutes|c__Bacilli|o__Bacillales|f__Bacillaceae|g__Bacillus|s__Bacillus_sp._SLG210A2-18-1	0	0	0	0	0	0	0	0	0	0	0	0	0	0	0	0	0	0	0	0	0	0	0	0	0	0	0	0	0	0	0	0	0	0	0	0	0	0	0	0	0	0	0	0	0	0	0	0	0
d__Bacteria|p__Firmicutes|c__Bacilli|o__Bacillales|f__Bacillaceae|g__Bacillus|s__Bacillus_sp._X24	0	0	0	0	0	0	0	0.00453	0	0	0	0	0	0	0	0	0	0	0	0	0	0	0	0	0	0	0	0	0	0	0	0	0	0	0	0	0	0	0	0	0	0	0	0	0	0	0	0	0
d__Bacteria|p__Firmicutes|c__Bacilli|o__Bacillales|f__Bacillaceae|g__Bacillus|s__Bacillus_subtilis	0	0	0	0	0	0	0	0	0	0	0	0	0	0	0	0	0	0	0	0	0	0	0	0	0	0.36243	0	0.50794	0	0	0	0	0	0	0	0	0	0	0	0	0	0	0	0	0	0	0	0	0
d__Bacteria|p__Firmicutes|c__Bacilli|o__Bacillales|f__Bacillaceae|g__Bacillus|s__Bacillus_thermoamylovorans	0	0	0	0	0	0	0	0	0	0.01101	0	0	0	0	0	0	0	0	0	0	0	0	0	0	0	0	0	0	0	0	0	0	0	0	0	0	0	0	0	0	0	0	0	0	0	0	0	0	0
d__Bacteria|p__Firmicutes|c__Bacilli|o__Bacillales|f__Bacillaceae|g__Bacillus|s__uncultured_Bacillus_sp.	0	0	0	0	0	0	0	0	0	0	0	0	0	0	0	0	0	0	0	0	0	0	0	0	0	1.99336	0	0	0	0.34107	0	0	0	0	0	0	0	0	0.02074	0	0	0	0	0	0	0	0	0	0
d__Bacteria|p__Firmicutes|c__Bacilli|o__Bacillales|f__Bacillaceae|g__Cerasibacillus	0	0	0	0	0	0	0	0	0	0	0	0	0	0	0	0	0	0	0	0	0	0	0	0	0	0	0	0	0	0	0	0	0	0	0	0	0	0	0	0	0	0	0	0	0	0	0	0	0
d__Bacteria|p__Firmicutes|c__Bacilli|o__Bacillales|f__Bacillaceae|g__Cerasibacillus|s__Cerasibacillus_quisquiliarum	0	0	0	0	0	0	0	0	0	0	0	0	0	0	0	0	0	0	0	0	0	0	0	0	0	0	0	0	0	0	0	0	0	0	0	0	0	0	0	0	0	0	0	0	0	0	0	0	0
d__Bacteria|p__Firmicutes|c__Bacilli|o__Bacillales|f__Bacillaceae|g__Geobacillus	0	0	0	0	0	0	0	0	0	0.01101	0	0	0	0	0	0	0	0	0.02234	0	0	0	0	0.19619	0	0	0	0	0	0	0	0	0	0	0	0	0	0	0	0.02035	0	0	0.05717	0	0	0	0	0	0
d__Bacteria|p__Firmicutes|c__Bacilli|o__Bacillales|f__Bacillaceae|g__Geobacillus|s__Geobacillus_sp._LV-3	0	0	0	0	0	0	0	0	0	0	0	0	0	0	0	0	0	0	0	0	0	0	0	0.03712	0	0	0	0	0	0	0	0	0	0	0	0	0	0	0	0	0	0	0.05717	0	0	0	0	0	0
d__Bacteria|p__Firmicutes|c__Bacilli|o__Bacillales|f__Bacillaceae|g__Geobacillus|s__Geobacillus_thermoleovorans	0	0	0	0	0	0	0	0	0	0	0	0	0	0	0	0	0	0	0.02234	0	0	0	0	0	0	0	0	0	0	0	0	0	0	0	0	0	0	0	0	0	0	0	0	0	0	0	0	0	0
d__Bacteria|p__Firmicutes|c__Bacilli|o__Bacillales|f__Bacillaceae|g__Geobacillus|s__Geobacillus_unclassified	0	0	0	0	0	0	0	0	0	0.01101	0	0	0	0	0	0	0	0	0	0	0	0	0	0.15907	0	0	0	0	0	0	0	0	0	0	0	0	0	0	0	0.02035	0	0	0	0	0	0	0	0	0
d__Bacteria|p__Firmicutes|c__Bacilli|o__Bacillales|f__Bacillaceae|g__Geobacillus|s__Geobacillus_uzenensis	0	0	0	0	0	0	0	0	0	0	0	0	0	0	0	0	0	0	0	0	0	0	0	0	0	0	0	0	0	0	0	0	0	0	0	0	0	0	0	0	0	0	0	0	0	0	0	0	0
d__Bacteria|p__Firmicutes|c__Bacilli|o__Bacillales|f__Bacillaceae|g__Gracilibacillus	0	0	0	0	0	0	0	0	0	0	0	0	0	0	0	0	0	0	0	0	0	0	0	0.10074	0	0	0	0	0.0454	0	0	0	0	0	0	0	0	0	0	0	0	0	0	0	0	0	0	0	0
d__Bacteria|p__Firmicutes|c__Bacilli|o__Bacillales|f__Bacillaceae|g__Gracilibacillus|s__Gracilibacillus_dipsosauri	0	0	0	0	0	0	0	0	0	0	0	0	0	0	0	0	0	0	0	0	0	0	0	0.10074	0	0	0	0	0.0227	0	0	0	0	0	0	0	0	0	0	0	0	0	0	0	0	0	0	0	0
d__Bacteria|p__Firmicutes|c__Bacilli|o__Bacillales|f__Bacillaceae|g__Gracilibacillus|s__uncultured_Gracilibacillus_sp.	0	0	0	0	0	0	0	0	0	0	0	0	0	0	0	0	0	0	0	0	0	0	0	0	0	0	0	0	0.0227	0	0	0	0	0	0	0	0	0	0	0	0	0	0	0	0	0	0	0	0
d__Bacteria|p__Firmicutes|c__Bacilli|o__Bacillales|f__Bacillaceae|g__Halobacillus	0	0	0	0	0	0	0	0	0	0	0	0	0	0	0	0	0	0	0	0	0	0	0	0	0	0	0	0	0	0	0	0	0	0	0	0	0	0	0	0	0	0	0	0	0	0	0	0	0
d__Bacteria|p__Firmicutes|c__Bacilli|o__Bacillales|f__Bacillaceae|g__Halobacillus|s__Halobacillus_sp._JC137	0	0	0	0	0	0	0	0	0	0	0	0	0	0	0	0	0	0	0	0	0	0	0	0	0	0	0	0	0	0	0	0	0	0	0	0	0	0	0	0	0	0	0	0	0	0	0	0	0
d__Bacteria|p__Firmicutes|c__Bacilli|o__Bacillales|f__Bacillaceae|g__Oceanobacillus	0	0	0	0	0	0	0	0	0	0	0	0	0	0	0	0	0	0	0	0	0	0	0	0	0	0	0	0	0	0	0	0	0	0	0	0	0	0	0	0	0	0	0	0	0	0	0	0	0
d__Bacteria|p__Firmicutes|c__Bacilli|o__Bacillales|f__Bacillaceae|g__Oceanobacillus|s__Oceanobacillus_unclassified	0	0	0	0	0	0	0	0	0	0	0	0	0	0	0	0	0	0	0	0	0	0	0	0	0	0	0	0	0	0	0	0	0	0	0	0	0	0	0	0	0	0	0	0	0	0	0	0	0
d__Bacteria|p__Firmicutes|c__Bacilli|o__Bacillales|f__Bacillaceae|g__Pseudogracilibacillus	0	0	0	0	0	0	0	0	0	0	0	0	0	0	0.00957	0	0.30834	0	0	0	0	0	0	0	0	0	0	0	0	0	0	0	0	0	0	0	0	0	0.0752	0	0	0	0	0	0	0	0	0	0
d__Bacteria|p__Firmicutes|c__Bacilli|o__Bacillales|f__Bacillaceae|g__Pseudogracilibacillus|s__Pseudogracilibacillus_endophyticus	0	0	0	0	0	0	0	0	0	0	0	0	0	0	0	0	0	0	0	0	0	0	0	0	0	0	0	0	0	0	0	0	0	0	0	0	0	0	0	0	0	0	0	0	0	0	0	0	0
d__Bacteria|p__Firmicutes|c__Bacilli|o__Bacillales|f__Bacillaceae|g__Pseudogracilibacillus|s__uncultured_Pseudogracilibacillus_sp.	0	0	0	0	0	0	0	0	0	0	0	0	0	0	0.00957	0	0.30834	0	0	0	0	0	0	0	0	0	0	0	0	0	0	0	0	0	0	0	0	0	0.0752	0	0	0	0	0	0	0	0	0	0
d__Bacteria|p__Firmicutes|c__Bacilli|o__Bacillales|f__Bacillaceae|g__Sinibacillus	0	0	0	0	0	0	0	0	0	0	0	0	0	0	0	0	0.25293	0	0	0	0	0	0	0	0	0	0	0	0	0	0	0	0	0.00538	0	0	0	0	0	0	0	0	0	0	0	0	0	0	0
d__Bacteria|p__Firmicutes|c__Bacilli|o__Bacillales|f__Bacillaceae|g__Sinibacillus|s__Sinibacillus_unclassified	0	0	0	0	0	0	0	0	0	0	0	0	0	0	0	0	0.25293	0	0	0	0	0	0	0	0	0	0	0	0	0	0	0	0	0.00538	0	0	0	0	0	0	0	0	0	0	0	0	0	0	0
d__Bacteria|p__Firmicutes|c__Bacilli|o__Bacillales|f__Bacillaceae|g__Virgibacillus	0	0	0	0	0	0	0	0	0	0	0	0	0	0	0	0	0.13972	0	0	0	0	0	0	0	0	0	0	0	0	0	0	0	0	0	0	0	0	0	0	0	0	0	0.03195	0	0	0	0	0	0
d__Bacteria|p__Firmicutes|c__Bacilli|o__Bacillales|f__Bacillaceae|g__Virgibacillus|s__uncultured_Virgibacillus_sp.	0	0	0	0	0	0	0	0	0	0	0	0	0	0	0	0	0.13972	0	0	0	0	0	0	0	0	0	0	0	0	0	0	0	0	0	0	0	0	0	0	0	0	0	0.03195	0	0	0	0	0	0
d__Bacteria|p__Firmicutes|c__Bacilli|o__Bacillales|f__Planococcaceae	0	0	0	0	0	0	0	0	0	0	0	0	0	0	0	0	0	0	0	0	0	0	0	0	0	0	0	0	0	0	0	0	0.01596	0	0	0	0	0	0	0	0	0	0.03026	0	0	0	0	0	0
d__Bacteria|p__Firmicutes|c__Bacilli|o__Bacillales|f__Planococcaceae|g__Chryseomicrobium	0	0	0	0	0	0	0	0	0	0	0	0	0	0	0	0	0	0	0	0	0	0	0	0	0	0	0	0	0	0	0	0	0	0	0	0	0	0	0	0	0	0	0	0	0	0	0	0	0
d__Bacteria|p__Firmicutes|c__Bacilli|o__Bacillales|f__Planococcaceae|g__Chryseomicrobium|s__Chryseomicrobium_amylolyticum	0	0	0	0	0	0	0	0	0	0	0	0	0	0	0	0	0	0	0	0	0	0	0	0	0	0	0	0	0	0	0	0	0	0	0	0	0	0	0	0	0	0	0	0	0	0	0	0	0
d__Bacteria|p__Firmicutes|c__Bacilli|o__Bacillales|f__Planococcaceae|g__Kurthia	0	0	0	0	0	0	0	0	0	0	0	0	0	0	0	0	0	0	0	0	0	0	0	0	0	0	0	0	0	0	0	0	0.01596	0	0	0	0	0	0	0	0	0	0	0	0	0	0	0	0
d__Bacteria|p__Firmicutes|c__Bacilli|o__Bacillales|f__Planococcaceae|g__Kurthia|s__Kurthia_zopfii	0	0	0	0	0	0	0	0	0	0	0	0	0	0	0	0	0	0	0	0	0	0	0	0	0	0	0	0	0	0	0	0	0.01596	0	0	0	0	0	0	0	0	0	0	0	0	0	0	0	0
d__Bacteria|p__Firmicutes|c__Bacilli|o__Bacillales|f__Planococcaceae|g__Lysinibacillus	0	0	0	0	0	0	0	0	0	0	0	0	0	0	0	0	0	0	0	0	0	0	0	0	0	0	0	0	0	0	0	0	0	0	0	0	0	0	0	0	0	0	0.03026	0	0	0	0	0	0
d__Bacteria|p__Firmicutes|c__Bacilli|o__Bacillales|f__Planococcaceae|g__Lysinibacillus|s__Lysinibacillus_unclassified	0	0	0	0	0	0	0	0	0	0	0	0	0	0	0	0	0	0	0	0	0	0	0	0	0	0	0	0	0	0	0	0	0	0	0	0	0	0	0	0	0	0	0.03026	0	0	0	0	0	0
d__Bacteria|p__Firmicutes|c__Bacilli|o__Bacillales|f__Planococcaceae|g__Solibacillus	0	0	0	0	0	0	0	0	0	0	0	0	0	0	0	0	0	0	0	0	0	0	0	0	0	0	0	0	0	0	0	0	0	0	0	0	0	0	0	0	0	0	0	0	0	0	0	0	0
d__Bacteria|p__Firmicutes|c__Bacilli|o__Bacillales|f__Planococcaceae|g__Solibacillus|s__Solibacillus_unclassified	0	0	0	0	0	0	0	0	0	0	0	0	0	0	0	0	0	0	0	0	0	0	0	0	0	0	0	0	0	0	0	0	0	0	0	0	0	0	0	0	0	0	0	0	0	0	0	0	0
d__Bacteria|p__Firmicutes|c__Bacilli|o__Bacillales|f__Sporolactobacillaceae	0	0	0	0	0	0	0	0	0	0	0	0	0	0	0	0	0	0	0	0	0	0	0	0	0	0	0	0	0	0	0	0	0	0	0	0	0	0	0	0	0	0	0.01345	0	0	0	0	0	0
d__Bacteria|p__Firmicutes|c__Bacilli|o__Bacillales|f__Sporolactobacillaceae|g__Scopulibacillus	0	0	0	0	0	0	0	0	0	0	0	0	0	0	0	0	0	0	0	0	0	0	0	0	0	0	0	0	0	0	0	0	0	0	0	0	0	0	0	0	0	0	0.01345	0	0	0	0	0	0
d__Bacteria|p__Firmicutes|c__Bacilli|o__Bacillales|f__Sporolactobacillaceae|g__Scopulibacillus|s__Scopulibacillus_unclassified	0	0	0	0	0	0	0	0	0	0	0	0	0	0	0	0	0	0	0	0	0	0	0	0	0	0	0	0	0	0	0	0	0	0	0	0	0	0	0	0	0	0	0.01345	0	0	0	0	0	0
d__Bacteria|p__Firmicutes|c__Bacilli|o__Bacilli_unclassified	0.91616	0	0	0.93712	0	0	0	0.00453	0	0	0	0	0	0	0.10524	0	0.06504	0.01097	0.01031	0.0066	0	0	0.90903	0.5647	0.03377	0.15101	1.44406	0	0.44084	0	0.4258	0	0	0.02017	0.0451	0.06921	0	0	0	0	0	0	0.04035	0.17711	0	0.37253	0.05985	0.12148	0.05674
d__Bacteria|p__Firmicutes|c__Bacilli|o__Bacilli_unclassified|f__Bacilli_unclassified	0.91616	0	0	0.93712	0	0	0	0.00453	0	0	0	0	0	0	0.10524	0	0.06504	0.01097	0.01031	0.0066	0	0	0.90903	0.5647	0.03377	0.15101	1.44406	0	0.44084	0	0.4258	0	0	0.02017	0.0451	0.06921	0	0	0	0	0	0	0.04035	0.17711	0	0.37253	0.05985	0.12148	0.05674
d__Bacteria|p__Firmicutes|c__Bacilli|o__Bacilli_unclassified|f__Bacilli_unclassified|g__Bacilli_unclassified	0.91616	0	0	0.93712	0	0	0	0.00453	0	0	0	0	0	0	0.10524	0	0.06504	0.01097	0.01031	0.0066	0	0	0.90903	0.5647	0.03377	0.15101	1.44406	0	0.44084	0	0.4258	0	0	0.02017	0.0451	0.06921	0	0	0	0	0	0	0.04035	0.17711	0	0.37253	0.05985	0.12148	0.05674
d__Bacteria|p__Firmicutes|c__Bacilli|o__Bacilli_unclassified|f__Bacilli_unclassified|g__Bacilli_unclassified|s__Bacilli_unclassified	0.91616	0	0	0.93712	0	0	0	0.00453	0	0	0	0	0	0	0.10524	0	0.06504	0.01097	0.01031	0.0066	0	0	0.90903	0.5647	0.03377	0.15101	1.44406	0	0.44084	0	0.4258	0	0	0.02017	0.0451	0.06921	0	0	0	0	0	0	0.04035	0.17711	0	0.37253	0.05985	0.12148	0.05674
d__Bacteria|p__Firmicutes|c__Bacilli|o__Brevibacillales	0	0	0	0	0	0	0.01142	0	0.00679	0	0	0	0	0	0	0.03216	0.00723	0	0	0	0	0	0	0.02651	0	0	0	0	0	0.04354	0	0.01121	0	0	0	0	0	0	0.01297	0	0	0.08868	0	0	0	0	0	0	0
d__Bacteria|p__Firmicutes|c__Bacilli|o__Brevibacillales|f__Brevibacillaceae	0	0	0	0	0	0	0.01142	0	0.00679	0	0	0	0	0	0	0.03216	0.00723	0	0	0	0	0	0	0.02651	0	0	0	0	0	0.04354	0	0.01121	0	0	0	0	0	0	0.01297	0	0	0.08868	0	0	0	0	0	0	0
d__Bacteria|p__Firmicutes|c__Bacilli|o__Brevibacillales|f__Brevibacillaceae|g__Brevibacillus	0	0	0	0	0	0	0.01142	0	0.00679	0	0	0	0	0	0	0.03216	0.00723	0	0	0	0	0	0	0.02651	0	0	0	0	0	0.04354	0	0.01121	0	0	0	0	0	0	0.01297	0	0	0.08868	0	0	0	0	0	0	0
d__Bacteria|p__Firmicutes|c__Bacilli|o__Brevibacillales|f__Brevibacillaceae|g__Brevibacillus|s__Brevibacillus_unclassified	0	0	0	0	0	0	0.01142	0	0.00679	0	0	0	0	0	0	0.03216	0.00723	0	0	0	0	0	0	0.02651	0	0	0	0	0	0.04354	0	0.01121	0	0	0	0	0	0	0.01297	0	0	0.08868	0	0	0	0	0	0	0
d__Bacteria|p__Firmicutes|c__Bacilli|o__Entomoplasmatales	0	0	0	0	0	0	0	0	0	0	0	0	0	0	0	0	0	0	0	0	0	0	0	0	0	0	0	0	0	0	0.00777	0.48349	0	0	0	0	0	0	0	0	0	0	0	0	0	0	0	0	0
d__Bacteria|p__Firmicutes|c__Bacilli|o__Entomoplasmatales|f__Entomoplasmataceae	0	0	0	0	0	0	0	0	0	0	0	0	0	0	0	0	0	0	0	0	0	0	0	0	0	0	0	0	0	0	0.00777	0.48349	0	0	0	0	0	0	0	0	0	0	0	0	0	0	0	0	0
d__Bacteria|p__Firmicutes|c__Bacilli|o__Entomoplasmatales|f__Entomoplasmataceae|g__Mycoplasma]_group	0	0	0	0	0	0	0	0	0	0	0	0	0	0	0	0	0	0	0	0	0	0	0	0	0	0	0	0	0	0	0.00777	0.48349	0	0	0	0	0	0	0	0	0	0	0	0	0	0	0	0	0
d__Bacteria|p__Firmicutes|c__Bacilli|o__Entomoplasmatales|f__Entomoplasmataceae|g__Mycoplasma]_group|s__Mycoplasma]_group_unclassified	0	0	0	0	0	0	0	0	0	0	0	0	0	0	0	0	0	0	0	0	0	0	0	0	0	0	0	0	0	0	0.00777	0.48349	0	0	0	0	0	0	0	0	0	0	0	0	0	0	0	0	0
d__Bacteria|p__Firmicutes|c__Bacilli|o__Erysipelotrichales	0	0	2.83557	2.94012	0.05316	0.0352	0.26438	0.21763	0.63781	0.35424	0.73721	1.12953	0.99042	0.90033	0.09886	0.19673	0.71062	0.24576	0.52578	0.82715	0.21095	0.49748	0.21463	0.06628	0.46214	0	0.23324	0.81341	0.44651	1.38315	2.99456	4.24212	0.18036	0.03496	0.0733	0.03214	0.70157	1.04431	0.08038	0.01599	0.20339	0	1.41738	2.0837	0.21569	0.37876	0.61508	0.83382	0.67249
d__Bacteria|p__Firmicutes|c__Bacilli|o__Erysipelotrichales|f__Erysipelatoclostridiaceae	0	0	2.39278	1.67394	0.02835	0.02449	0.22195	0.21763	0.58693	0.32487	0.71219	1.11414	0.97824	0.85053	0.05421	0.19673	0.5974	0.07461	0.10997	0.19316	0.03206	0.05378	0.21463	0.00795	0.36083	0	0.16845	0.28771	0.25542	0.80986	0.82051	0.46107	0.13088	0.02017	0.00987	0.03214	0.70157	1.04431	0	0.01599	0.19782	0	1.41738	2.0837	0.02397	0.22913	0.23772	0.19051	0.22861
d__Bacteria|p__Firmicutes|c__Bacilli|o__Erysipelotrichales|f__Erysipelatoclostridiaceae|g__Asteroleplasma	0	0	0	0	0	0	0	0	0	0	0	0	0	0	0.02073	0	0	0	0	0	0	0	0	0	0	0	0	0	0	0	0	0	0	0	0	0	0	0	0	0	0	0	0	0	0	0	0	0	0
d__Bacteria|p__Firmicutes|c__Bacilli|o__Erysipelotrichales|f__Erysipelatoclostridiaceae|g__Asteroleplasma|s__Asteroleplasma_unclassified	0	0	0	0	0	0	0	0	0	0	0	0	0	0	0.02073	0	0	0	0	0	0	0	0	0	0	0	0	0	0	0	0	0	0	0	0	0	0	0	0	0	0	0	0	0	0	0	0	0	0
d__Bacteria|p__Firmicutes|c__Bacilli|o__Erysipelotrichales|f__Erysipelatoclostridiaceae|g__Candidatus_Stoquefichus	0	0	0	0	0	0	0	0	0	0	0	0	0	0	0	0	0	0	0	0.0066	0	0	0	0	0	0	0	0	0	0	0	0	0	0	0	0	0	0	0	0	0	0	0	0	0	0	0	0	0
d__Bacteria|p__Firmicutes|c__Bacilli|o__Erysipelotrichales|f__Erysipelatoclostridiaceae|g__Candidatus_Stoquefichus|s__Candidatus_Stoquefichus_unclassified	0	0	0	0	0	0	0	0	0	0	0	0	0	0	0	0	0	0	0	0.0066	0	0	0	0	0	0	0	0	0	0	0	0	0	0	0	0	0	0	0	0	0	0	0	0	0	0	0	0	0
d__Bacteria|p__Firmicutes|c__Bacilli|o__Erysipelotrichales|f__Erysipelatoclostridiaceae|g__Catenibacterium	0	0	1.66047	0.01431	0	0	0	0	0	0.00367	0	0	0	0	0	0	0	0	0	0	0	0	0	0.00795	0	0	0	0	0	0	0	0	0	0	0	0.00989	0	0	0	0	0	0	0	0	0	0	0	0	0
d__Bacteria|p__Firmicutes|c__Bacilli|o__Erysipelotrichales|f__Erysipelatoclostridiaceae|g__Catenibacterium|s__Catenibacterium_unclassified	0	0	1.66047	0.01431	0	0	0	0	0	0.00367	0	0	0	0	0	0	0	0	0	0	0	0	0	0.00795	0	0	0	0	0	0	0	0	0	0	0	0.00989	0	0	0	0	0	0	0	0	0	0	0	0	0
d__Bacteria|p__Firmicutes|c__Bacilli|o__Erysipelotrichales|f__Erysipelatoclostridiaceae|g__Coprobacillus	0	0	0	0	0	0	0	0	0	0	0	0	0	0	0	0	0	0	0	0	0	0	0	0	0	0	0	0.01243	0.04541	0.22206	0	0	0	0	0	0	0	0	0	0	0	0	0	0	0	0	0	0	0
d__Bacteria|p__Firmicutes|c__Bacilli|o__Erysipelotrichales|f__Erysipelatoclostridiaceae|g__Coprobacillus|s__Coprobacillus_unclassified	0	0	0	0	0	0	0	0	0	0	0	0	0	0	0	0	0	0	0	0	0	0	0	0	0	0	0	0.01243	0.04541	0.22206	0	0	0	0	0	0	0	0	0	0	0	0	0	0	0	0	0	0	0
d__Bacteria|p__Firmicutes|c__Bacilli|o__Erysipelotrichales|f__Erysipelatoclostridiaceae|g__Erysipelatoclostridium	0	0	0	0	0	0	0.22195	0.21763	0.02375	0	0.02887	0.04233	0	0.05378	0.00478	0	0.5974	0.07461	0	0	0	0	0.21463	0	0.20441	0	0.07487	0.12965	0.21001	0.57619	0	0	0.00798	0	0.00987	0	0	0	0	0	0.18946	0	1.41738	2.0837	0	0.00779	0.02327	0	0.03337
d__Bacteria|p__Firmicutes|c__Bacilli|o__Erysipelotrichales|f__Erysipelatoclostridiaceae|g__Erysipelatoclostridium|s__Erysipelatoclostridium_unclassified	0	0	0	0	0	0	0.22195	0.21763	0.02375	0	0.02887	0.04233	0	0.05378	0.00478	0	0.5974	0.07461	0	0	0	0	0.21463	0	0.20441	0	0.07487	0.12965	0.21001	0.57619	0	0	0.00798	0	0.00987	0	0	0	0	0	0.18946	0	1.41738	2.0837	0	0.00779	0.02327	0	0.03337
d__Bacteria|p__Firmicutes|c__Bacilli|o__Erysipelotrichales|f__Erysipelatoclostridiaceae|g__Erysipelotrichaceae_UCG-003	0	0	0.73231	1.65963	0.02835	0.02449	0	0	0.56318	0.3212	0.68332	1.07181	0.97824	0.79675	0.0287	0.19673	0	0	0.10997	0.18656	0.03206	0.05378	0	0	0.15642	0	0.09358	0.14563	0	0.01161	0.82051	0.46107	0.1229	0.02017	0	0.02225	0.70157	1.04431	0	0.01599	0.00836	0	0	0	0.02397	0.22134	0.21445	0.19051	0.19524
d__Bacteria|p__Firmicutes|c__Bacilli|o__Erysipelotrichales|f__Erysipelatoclostridiaceae|g__Erysipelotrichaceae_UCG-003|s__Erysipelotrichaceae_UCG-003_unclassified	0	0	0.73231	1.65963	0.02835	0.02449	0	0	0.56318	0.3212	0.68332	1.07181	0.97824	0.79675	0.0287	0.19673	0	0	0.10997	0.18656	0.03206	0.05378	0	0	0.15642	0	0.09358	0.14563	0	0.01161	0.82051	0.46107	0.1229	0.02017	0	0.02225	0.70157	1.04431	0	0.01599	0.00836	0	0	0	0.02397	0.22134	0.21445	0.19051	0.19524
d__Bacteria|p__Firmicutes|c__Bacilli|o__Erysipelotrichales|f__Erysipelotrichaceae	0	0	0.44279	1.26618	0.02481	0.01071	0.04243	0	0.05088	0.02937	0.02502	0.01539	0.01218	0.0498	0.04465	0	0.11322	0.17115	0.41581	0.63399	0.17889	0.4437	0	0.05833	0.10131	0	0.06479	0.5257	0.19109	0.57329	2.17405	3.78105	0.04948	0.01479	0.06343	0	0	0	0.08038	0	0.00557	0	0	0	0.19172	0.14963	0.37736	0.64331	0.44388
d__Bacteria|p__Firmicutes|c__Bacilli|o__Erysipelotrichales|f__Erysipelotrichaceae|g__Allobaculum	0	0	0	0	0	0	0	0	0	0	0	0	0	0	0	0	0	0	0	0	0	0	0	0	0	0	0	0	0	0	0	0	0	0	0	0	0	0	0	0	0.00557	0	0	0	0	0	0	0	0
d__Bacteria|p__Firmicutes|c__Bacilli|o__Erysipelotrichales|f__Erysipelotrichaceae|g__Allobaculum|s__Allobaculum_unclassified	0	0	0	0	0	0	0	0	0	0	0	0	0	0	0	0	0	0	0	0	0	0	0	0	0	0	0	0	0	0	0	0	0	0	0	0	0	0	0	0	0.00557	0	0	0	0	0	0	0	0
d__Bacteria|p__Firmicutes|c__Bacilli|o__Erysipelotrichales|f__Erysipelotrichaceae|g__Bulleidia	0	0	0	0	0	0	0	0	0	0	0	0	0	0	0	0	0	0.01097	0	0	0	0	0	0.04242	0	0	0.02304	0	0.02838	0	0	0	0	0	0	0	0	0	0	0	0	0	0	0	0	0.01559	0	0	0
d__Bacteria|p__Firmicutes|c__Bacilli|o__Erysipelotrichales|f__Erysipelotrichaceae|g__Bulleidia|s__Bulleidia_unclassified	0	0	0	0	0	0	0	0	0	0	0	0	0	0	0	0	0	0.01097	0	0	0	0	0	0.04242	0	0	0.02304	0	0.02838	0	0	0	0	0	0	0	0	0	0	0	0	0	0	0	0	0.01559	0	0	0
d__Bacteria|p__Firmicutes|c__Bacilli|o__Erysipelotrichales|f__Erysipelotrichaceae|g__Catenisphaera	0	0	0	0	0	0	0	0	0	0	0	0	0	0	0	0	0	0	0	0	0	0	0	0	0	0	0	0	0	0	0	0	0	0	0	0	0	0	0	0	0	0	0	0	0	0	0	0	0
d__Bacteria|p__Firmicutes|c__Bacilli|o__Erysipelotrichales|f__Erysipelotrichaceae|g__Catenisphaera|s__Catenisphaera_unclassified	0	0	0	0	0	0	0	0	0	0	0	0	0	0	0	0	0	0	0	0	0	0	0	0	0	0	0	0	0	0	0	0	0	0	0	0	0	0	0	0	0	0	0	0	0	0	0	0	0
d__Bacteria|p__Firmicutes|c__Bacilli|o__Erysipelotrichales|f__Erysipelotrichaceae|g__Clostridium]_innocuum_group	0	0	0	0	0	0	0	0	0.02205	0	0	0	0	0	0	0	0	0	0.06873	0.05944	0.00844	0.03025	0	0	0.09598	0	0.01008	0	0.14947	0.57329	0	0	0.02394	0.00403	0.05638	0	0	0	0	0	0	0	0	0	0	0	0.00665	0	0.01168
d__Bacteria|p__Firmicutes|c__Bacilli|o__Erysipelotrichales|f__Erysipelotrichaceae|g__Clostridium]_innocuum_group|s__Clostridium]_innocuum_group_unclassified	0	0	0	0	0	0	0	0	0.02205	0	0	0	0	0	0	0	0	0	0.06873	0.05944	0.00844	0.03025	0	0	0.09598	0	0.01008	0	0.14947	0.57329	0	0	0.02394	0.00403	0.05638	0	0	0	0	0	0	0	0	0	0	0	0.00665	0	0.01168
d__Bacteria|p__Firmicutes|c__Bacilli|o__Erysipelotrichales|f__Erysipelotrichaceae|g__Dielma	0	0	0	0	0.01595	0.00459	0	0	0	0	0	0	0	0	0	0	0	0	0.0189	0.03302	0.02869	0.02857	0	0	0	0	0	0	0	0	0	0	0.01756	0	0	0	0	0	0	0	0	0	0	0	0	0	0	0	0
d__Bacteria|p__Firmicutes|c__Bacilli|o__Erysipelotrichales|f__Erysipelotrichaceae|g__Dielma|s__Dielma_unclassified	0	0	0	0	0.01595	0.00459	0	0	0	0	0	0	0	0	0	0	0	0	0.0189	0.03302	0.02869	0.02857	0	0	0	0	0	0	0	0	0	0	0.01756	0	0	0	0	0	0	0	0	0	0	0	0	0	0	0	0
d__Bacteria|p__Firmicutes|c__Bacilli|o__Erysipelotrichales|f__Erysipelotrichaceae|g__Erysipelothrix	0	0	0	0	0	0	0	0	0	0	0	0	0	0	0	0	0	0	0	0	0	0	0	0	0	0	0	0	0	0	0	0.10371	0	0	0	0	0	0	0	0	0	0	0	0	0	0	0	0	0
d__Bacteria|p__Firmicutes|c__Bacilli|o__Erysipelotrichales|f__Erysipelotrichaceae|g__Erysipelothrix|s__Erysipelothrix_unclassified	0	0	0	0	0	0	0	0	0	0	0	0	0	0	0	0	0	0	0	0	0	0	0	0	0	0	0	0	0	0	0	0.10371	0	0	0	0	0	0	0	0	0	0	0	0	0	0	0	0	0
d__Bacteria|p__Firmicutes|c__Bacilli|o__Erysipelotrichales|f__Erysipelotrichaceae|g__Erysipelotrichaceae_unclassified	0	0	0	0	0	0	0	0	0	0	0	0	0	0	0	0	0	0	0	0	0	0	0	0	0	0	0	0	0	0	0	0	0	0	0	0	0	0	0	0	0	0	0	0	0.00871	0	0	0	0
d__Bacteria|p__Firmicutes|c__Bacilli|o__Erysipelotrichales|f__Erysipelotrichaceae|g__Erysipelotrichaceae_unclassified|s__Erysipelotrichaceae_unclassified	0	0	0	0	0	0	0	0	0	0	0	0	0	0	0	0	0	0	0	0	0	0	0	0	0	0	0	0	0	0	0	0	0	0	0	0	0	0	0	0	0	0	0	0	0.00871	0	0	0	0
d__Bacteria|p__Firmicutes|c__Bacilli|o__Erysipelotrichales|f__Erysipelotrichaceae|g__Faecalibaculum	0	0	0	0	0	0	0	0	0	0	0	0	0	0	0	0	0	0	0	0	0	0	0	0	0	0	0	0	0	0	0	0	0	0	0	0	0	0	0	0	0	0	0	0	0.0719	0	0	0	0
d__Bacteria|p__Firmicutes|c__Bacilli|o__Erysipelotrichales|f__Erysipelotrichaceae|g__Faecalibaculum|s__Faecalibaculum_unclassified	0	0	0	0	0	0	0	0	0	0	0	0	0	0	0	0	0	0	0	0	0	0	0	0	0	0	0	0	0	0	0	0	0	0	0	0	0	0	0	0	0	0	0	0	0.0719	0	0	0	0
d__Bacteria|p__Firmicutes|c__Bacilli|o__Erysipelotrichales|f__Erysipelotrichaceae|g__Faecalitalea	0	0	0	0	0.00886	0.00612	0.04243	0	0.01187	0.02937	0	0	0	0	0	0	0.08431	0.02194	0.32131	0.4887	0.14176	0.37984	0	0	0.00533	0	0	0	0	0	0	0	0	0	0	0	0	0	0	0	0	0	0	0	0.11111	0.12781	0.35409	0.64331	0.40884
d__Bacteria|p__Firmicutes|c__Bacilli|o__Erysipelotrichales|f__Erysipelotrichaceae|g__Faecalitalea|s__Faecalitalea_unclassified	0	0	0	0	0.00886	0.00612	0.04243	0	0.01187	0.02937	0	0	0	0	0	0	0.08431	0.02194	0.32131	0.4887	0.14176	0.37984	0	0	0.00533	0	0	0	0	0	0	0	0	0	0	0	0	0	0	0	0	0	0	0	0.11111	0.12781	0.35409	0.64331	0.40884
d__Bacteria|p__Firmicutes|c__Bacilli|o__Erysipelotrichales|f__Erysipelotrichaceae|g__Holdemanella	0	0	0.44279	1.26618	0	0	0	0	0	0	0	0	0	0	0	0	0	0	0	0	0	0	0	0	0	0	0	0	0.01324	0	2.17405	3.67734	0	0	0	0	0	0	0.08038	0	0	0	0	0	0	0	0	0	0
d__Bacteria|p__Firmicutes|c__Bacilli|o__Erysipelotrichales|f__Erysipelotrichaceae|g__Holdemanella|s__Holdemanella_unclassified	0	0	0.44279	1.26618	0	0	0	0	0	0	0	0	0	0	0	0	0	0	0	0	0	0	0	0	0	0	0	0	0.01324	0	2.17405	3.67734	0	0	0	0	0	0	0.08038	0	0	0	0	0	0	0	0	0	0
d__Bacteria|p__Firmicutes|c__Bacilli|o__Erysipelotrichales|f__Erysipelotrichaceae|g__Holdemania	0	0	0	0	0	0	0	0	0.01696	0	0.02502	0.01539	0.01218	0.0498	0	0	0	0.05047	0.00687	0.05283	0	0.00504	0	0	0	0	0	0.5257	0	0	0	0	0	0	0	0	0	0	0	0	0	0	0	0	0	0	0.01662	0	0.02336
d__Bacteria|p__Firmicutes|c__Bacilli|o__Erysipelotrichales|f__Erysipelotrichaceae|g__Holdemania|s__Holdemania_unclassified	0	0	0	0	0	0	0	0	0.01696	0	0.02502	0.01539	0.01218	0.0498	0	0	0	0.05047	0.00687	0.05283	0	0.00504	0	0	0	0	0	0.5257	0	0	0	0	0	0	0	0	0	0	0	0	0	0	0	0	0	0	0.01662	0	0.02336
d__Bacteria|p__Firmicutes|c__Bacilli|o__Erysipelotrichales|f__Erysipelotrichaceae|g__Solobacterium	0	0	0	0	0	0	0	0	0	0	0	0	0	0	0	0	0	0.02194	0	0	0	0	0	0.01591	0	0	0.02879	0	0	0	0	0	0.00798	0	0.00705	0	0	0	0	0	0	0	0	0	0	0.00623	0	0	0
d__Bacteria|p__Firmicutes|c__Bacilli|o__Erysipelotrichales|f__Erysipelotrichaceae|g__Solobacterium|s__Solobacterium_unclassified	0	0	0	0	0	0	0	0	0	0	0	0	0	0	0	0	0	0.02194	0	0	0	0	0	0.01591	0	0	0.02879	0	0	0	0	0	0.00798	0	0.00705	0	0	0	0	0	0	0	0	0	0	0.00623	0	0	0
d__Bacteria|p__Firmicutes|c__Bacilli|o__Erysipelotrichales|f__Erysipelotrichaceae|g__Turicibacter	0	0	0	0	0	0	0	0	0	0	0	0	0	0	0.04465	0	0.02891	0.06583	0	0	0	0	0	0	0	0	0.00288	0	0	0	0	0	0	0.01076	0	0	0	0	0	0	0	0	0	0	0	0	0	0	0
d__Bacteria|p__Firmicutes|c__Bacilli|o__Erysipelotrichales|f__Erysipelotrichaceae|g__Turicibacter|s__Turicibacter_unclassified	0	0	0	0	0	0	0	0	0	0	0	0	0	0	0.04465	0	0.02891	0.06583	0	0	0	0	0	0	0	0	0.00288	0	0	0	0	0	0	0.01076	0	0	0	0	0	0	0	0	0	0	0	0	0	0	0
d__Bacteria|p__Firmicutes|c__Bacilli|o__Erysipelotrichales|f__Erysipelotrichaceae|g__ZOR0006	0	0	0	0	0	0	0	0	0	0	0	0	0	0	0	0	0	0	0	0	0	0	0	0	0	0	0	0	0	0	0	0	0	0	0	0	0	0	0	0	0	0	0	0	0	0	0	0	0
d__Bacteria|p__Firmicutes|c__Bacilli|o__Erysipelotrichales|f__Erysipelotrichaceae|g__ZOR0006|s__ZOR0006_unclassified	0	0	0	0	0	0	0	0	0	0	0	0	0	0	0	0	0	0	0	0	0	0	0	0	0	0	0	0	0	0	0	0	0	0	0	0	0	0	0	0	0	0	0	0	0	0	0	0	0
d__Bacteria|p__Firmicutes|c__Bacilli|o__Exiguobacterales	0	0	0	0	0	0	0	0	0	0	0	0	0	0	0	0	0	0	0	0	0	0	0	0	0	0	0	0	0	0	0	0	0	0	0	0	0	0	0	0	0	0	0	0	0	0	0	0	0
d__Bacteria|p__Firmicutes|c__Bacilli|o__Exiguobacterales|f__Exiguobacteraceae	0	0	0	0	0	0	0	0	0	0	0	0	0	0	0	0	0	0	0	0	0	0	0	0	0	0	0	0	0	0	0	0	0	0	0	0	0	0	0	0	0	0	0	0	0	0	0	0	0
d__Bacteria|p__Firmicutes|c__Bacilli|o__Exiguobacterales|f__Exiguobacteraceae|g__Exiguobacterium	0	0	0	0	0	0	0	0	0	0	0	0	0	0	0	0	0	0	0	0	0	0	0	0	0	0	0	0	0	0	0	0	0	0	0	0	0	0	0	0	0	0	0	0	0	0	0	0	0
d__Bacteria|p__Firmicutes|c__Bacilli|o__Exiguobacterales|f__Exiguobacteraceae|g__Exiguobacterium|s__Exiguobacterium_unclassified	0	0	0	0	0	0	0	0	0	0	0	0	0	0	0	0	0	0	0	0	0	0	0	0	0	0	0	0	0	0	0	0	0	0	0	0	0	0	0	0	0	0	0	0	0	0	0	0	0
d__Bacteria|p__Firmicutes|c__Bacilli|o__Haloplasmatales	0	0	0	0	0	0	0	0	0	0	0	0	0	0	0	0	0	0	0	0	0	0	0	0	0	0	0	0	0	0	0	0	0	0	0	0	0	0	0	0	0	0	0	0	0	0	0	0.02485	0
d__Bacteria|p__Firmicutes|c__Bacilli|o__Haloplasmatales|f__Haloplasmataceae	0	0	0	0	0	0	0	0	0	0	0	0	0	0	0	0	0	0	0	0	0	0	0	0	0	0	0	0	0	0	0	0	0	0	0	0	0	0	0	0	0	0	0	0	0	0	0	0.02485	0
d__Bacteria|p__Firmicutes|c__Bacilli|o__Haloplasmatales|f__Haloplasmataceae|g__Haloplasma	0	0	0	0	0	0	0	0	0	0	0	0	0	0	0	0	0	0	0	0	0	0	0	0	0	0	0	0	0	0	0	0	0	0	0	0	0	0	0	0	0	0	0	0	0	0	0	0.02485	0
d__Bacteria|p__Firmicutes|c__Bacilli|o__Haloplasmatales|f__Haloplasmataceae|g__Haloplasma|s__Haloplasma_unclassified	0	0	0	0	0	0	0	0	0	0	0	0	0	0	0	0	0	0	0	0	0	0	0	0	0	0	0	0	0	0	0	0	0	0	0	0	0	0	0	0	0	0	0	0	0	0	0	0.02485	0
d__Bacteria|p__Firmicutes|c__Bacilli|o__Lactobacillales	6.21678	4.80415	0.2441	0.07869	0.0124	0	1.28439	0.94911	0.16963	0.20374	0.11935	0.0558	0.06494	0.10159	1.17204	0.75477	0.37819	0.25455	0.01031	0.02477	0.027	0.03529	11.7732	6.81885	1.96942	3.94645	6.93667	2.01222	2.32529	0.61248	0.32323	0.23544	4.24094	0.02823	0.30021	0.34605	0.03744	0.04697	4.78154	0.13952	0.08357	0.4014	16.7799	15.6794	0.14162	1.50415	0.36739	0.28714	0.38715
d__Bacteria|p__Firmicutes|c__Bacilli|o__Lactobacillales|f__Aerococcaceae	0	0	0	0	0	0	0	0	0	0	0	0	0	0.05378	0.01116	0	0	0	0	0	0	0	0	0.06628	0	0	0.01008	0	0.01514	0	0	0	0	0.00403	0	0.01977	0	0.00313	0	0	0.00557	0	0	0	0	0	0	0	0
d__Bacteria|p__Firmicutes|c__Bacilli|o__Lactobacillales|f__Aerococcaceae|g__Abiotrophia	0	0	0	0	0	0	0	0	0	0	0	0	0	0	0.01116	0	0	0	0	0	0	0	0	0	0	0	0.01008	0	0	0	0	0	0	0	0	0	0	0	0	0	0	0	0	0	0	0	0	0	0
d__Bacteria|p__Firmicutes|c__Bacilli|o__Lactobacillales|f__Aerococcaceae|g__Abiotrophia|s__uncultured_Abiotrophia_sp.	0	0	0	0	0	0	0	0	0	0	0	0	0	0	0.01116	0	0	0	0	0	0	0	0	0	0	0	0.01008	0	0	0	0	0	0	0	0	0	0	0	0	0	0	0	0	0	0	0	0	0	0
d__Bacteria|p__Firmicutes|c__Bacilli|o__Lactobacillales|f__Aerococcaceae|g__Aerococcus	0	0	0	0	0	0	0	0	0	0	0	0	0	0.05378	0	0	0	0	0	0	0	0	0	0.06628	0	0	0	0	0.01514	0	0	0	0	0.00403	0	0.01977	0	0.00313	0	0	0.00557	0	0	0	0	0	0	0	0
d__Bacteria|p__Firmicutes|c__Bacilli|o__Lactobacillales|f__Aerococcaceae|g__Aerococcus|s__Aerococcus_sp._148a	0	0	0	0	0	0	0	0	0	0	0	0	0	0.05378	0	0	0	0	0	0	0	0	0	0.06628	0	0	0	0	0.01514	0	0	0	0	0.00403	0	0.01977	0	0.00313	0	0	0.00557	0	0	0	0	0	0	0	0
d__Bacteria|p__Firmicutes|c__Bacilli|o__Lactobacillales|f__Aerococcaceae|g__Ignavigranum	0	0	0	0	0	0	0	0	0	0	0	0	0	0	0	0	0	0	0	0	0	0	0	0	0	0	0	0	0	0	0	0	0	0	0	0	0	0	0	0	0	0	0	0	0	0	0	0	0
d__Bacteria|p__Firmicutes|c__Bacilli|o__Lactobacillales|f__Aerococcaceae|g__Ignavigranum|s__Ignavigranum_unclassified	0	0	0	0	0	0	0	0	0	0	0	0	0	0	0	0	0	0	0	0	0	0	0	0	0	0	0	0	0	0	0	0	0	0	0	0	0	0	0	0	0	0	0	0	0	0	0	0	0
d__Bacteria|p__Firmicutes|c__Bacilli|o__Lactobacillales|f__Carnobacteriaceae	0.409	0.7593	0	0	0	0	0.08813	0.12242	0.01526	0.00551	0.0154	0	0	0.01992	0.04624	0	0.05781	0	0	0	0	0.00336	1.18048	0.45865	0.06932	0	0.44488	0	0.02838	0	0	0	0	0.00269	0.05497	0	0.02116	0	0.15299	0	0	0	0.14964	0.17443	0	0.24316	0.07813	0	0.05674
d__Bacteria|p__Firmicutes|c__Bacilli|o__Lactobacillales|f__Carnobacteriaceae|g__Atopostipes	0	0	0	0	0	0	0	0	0.01187	0	0	0	0	0	0	0	0.04336	0	0	0	0	0	0	0	0	0	0	0	0	0	0	0	0	0	0	0	0.02116	0	0	0	0	0	0	0	0	0	0	0	0
d__Bacteria|p__Firmicutes|c__Bacilli|o__Lactobacillales|f__Carnobacteriaceae|g__Atopostipes|s__uncultured_Atopostipes_sp.	0	0	0	0	0	0	0	0	0.01187	0	0	0	0	0	0	0	0.04336	0	0	0	0	0	0	0	0	0	0	0	0	0	0	0	0	0	0	0	0.02116	0	0	0	0	0	0	0	0	0	0	0	0
d__Bacteria|p__Firmicutes|c__Bacilli|o__Lactobacillales|f__Carnobacteriaceae|g__Granulicatella	0	0	0	0	0	0	0	0	0.00339	0	0	0	0	0	0	0	0	0	0	0	0	0.00336	0	0.45865	0.06932	0	0.33258	0	0.02838	0	0	0	0	0	0	0	0	0	0.02852	0	0	0	0.03363	0.02952	0	0.06079	0	0	0
d__Bacteria|p__Firmicutes|c__Bacilli|o__Lactobacillales|f__Carnobacteriaceae|g__Granulicatella|s__Granulicatella_elegans	0	0	0	0	0	0	0	0	0	0	0	0	0	0	0	0	0	0	0	0	0	0	0	0	0	0	0	0	0	0	0	0	0	0	0	0	0	0	0	0	0	0	0.03363	0	0	0	0	0	0
d__Bacteria|p__Firmicutes|c__Bacilli|o__Lactobacillales|f__Carnobacteriaceae|g__Granulicatella|s__Granulicatella_sp._M658/99/3	0	0	0	0	0	0	0	0	0	0	0	0	0	0	0	0	0	0	0	0	0	0	0	0	0	0	0	0	0	0	0	0	0	0	0	0	0	0	0	0	0	0	0	0	0	0	0	0	0
d__Bacteria|p__Firmicutes|c__Bacilli|o__Lactobacillales|f__Carnobacteriaceae|g__Granulicatella|s__Granulicatella_unclassified	0	0	0	0	0	0	0	0	0	0	0	0	0	0	0	0	0	0	0	0	0	0	0	0	0	0	0	0	0	0	0	0	0	0	0	0	0	0	0	0	0	0	0	0	0	0.04676	0	0	0
d__Bacteria|p__Firmicutes|c__Bacilli|o__Lactobacillales|f__Carnobacteriaceae|g__Granulicatella|s__uncultured_Granulicatella_sp.	0	0	0	0	0	0	0	0	0.00339	0	0	0	0	0	0	0	0	0	0	0	0	0.00336	0	0.45865	0.06932	0	0.33258	0	0.02838	0	0	0	0	0	0	0	0	0	0.02852	0	0	0	0	0.02952	0	0.01403	0	0	0
d__Bacteria|p__Firmicutes|c__Bacilli|o__Lactobacillales|f__Carnobacteriaceae|g__Trichococcus	0.409	0.7593	0	0	0	0	0.08813	0.12242	0	0.00551	0.0154	0	0	0.01992	0.04624	0	0.01445	0	0	0	0	0	1.18048	0	0	0	0.1123	0	0	0	0	0	0	0.00269	0.05497	0	0	0	0.12447	0	0	0	0.11601	0.14491	0	0.18237	0.07813	0	0.05674
d__Bacteria|p__Firmicutes|c__Bacilli|o__Lactobacillales|f__Carnobacteriaceae|g__Trichococcus|s__Trichococcus_unclassified	0	0	0	0	0	0	0	0	0	0	0	0	0	0	0	0	0	0	0	0	0	0	0	0	0	0	0	0	0	0	0	0	0	0	0	0	0	0	0	0	0	0	0	0	0	0	0	0	0
d__Bacteria|p__Firmicutes|c__Bacilli|o__Lactobacillales|f__Carnobacteriaceae|g__Trichococcus|s__uncultured_Trichococcus_sp.	0.409	0.7593	0	0	0	0	0.08813	0.12242	0	0.00551	0.0154	0	0	0.01992	0.04624	0	0.01445	0	0	0	0	0	1.18048	0	0	0	0.1123	0	0	0	0	0	0	0.00269	0.05497	0	0	0	0.12447	0	0	0	0.11601	0.14491	0	0.18237	0.07813	0	0.05674
d__Bacteria|p__Firmicutes|c__Bacilli|o__Lactobacillales|f__Enterococcaceae	0	0	0	0	0.0124	0	0	0	0	0	0	0	0	0	0	0	0	0	0	0	0	0	0	0	0	0.17115	0	0	0.9952	0.52829	0	0	0.0415	0	0	0.04944	0	0	0	0	0	0	0.16477	0.08319	0	0	0	0	0
d__Bacteria|p__Firmicutes|c__Bacilli|o__Lactobacillales|f__Enterococcaceae|g__Enterococcus	0	0	0	0	0.0124	0	0	0	0	0	0	0	0	0	0	0	0	0	0	0	0	0	0	0	0	0.17115	0	0	0.9952	0.52829	0	0	0.0415	0	0	0.04944	0	0	0	0	0	0	0.16477	0.08319	0	0	0	0	0
d__Bacteria|p__Firmicutes|c__Bacilli|o__Lactobacillales|f__Enterococcaceae|g__Enterococcus|s__Enterococcus_avium	0	0	0	0	0	0	0	0	0	0	0	0	0	0	0	0	0	0	0	0	0	0	0	0	0	0	0	0	0.57139	0.50652	0	0	0	0	0	0	0	0	0	0	0	0	0.07734	0	0	0	0	0	0
d__Bacteria|p__Firmicutes|c__Bacilli|o__Lactobacillales|f__Enterococcaceae|g__Enterococcus|s__Enterococcus_columbae	0	0	0	0	0	0	0	0	0	0	0	0	0	0	0	0	0	0	0	0	0	0	0	0	0	0	0	0	0	0	0	0	0	0	0	0	0	0	0	0	0	0	0	0	0	0	0	0	0
d__Bacteria|p__Firmicutes|c__Bacilli|o__Lactobacillales|f__Enterococcaceae|g__Enterococcus|s__Enterococcus_durans	0	0	0	0	0	0	0	0	0	0	0	0	0	0	0	0	0	0	0	0	0	0	0	0	0	0	0	0	0	0	0	0	0	0	0	0	0	0	0	0	0	0	0	0	0	0	0	0	0
d__Bacteria|p__Firmicutes|c__Bacilli|o__Lactobacillales|f__Enterococcaceae|g__Enterococcus|s__Enterococcus_faecalis	0	0	0	0	0.0124	0	0	0	0	0	0	0	0	0	0	0	0	0	0	0	0	0	0	0	0	0	0	0	0.34245	0	0	0	0	0	0	0	0	0	0	0	0	0	0	0	0	0	0	0	0
d__Bacteria|p__Firmicutes|c__Bacilli|o__Lactobacillales|f__Enterococcaceae|g__Enterococcus|s__Enterococcus_faecium	0	0	0	0	0	0	0	0	0	0	0	0	0	0	0	0	0	0	0	0	0	0	0	0	0	0	0	0	0	0	0	0	0	0	0	0	0	0	0	0	0	0	0.08743	0	0	0	0	0	0
d__Bacteria|p__Firmicutes|c__Bacilli|o__Lactobacillales|f__Enterococcaceae|g__Enterococcus|s__Enterococcus_gallinarum	0	0	0	0	0	0	0	0	0	0	0	0	0	0	0	0	0	0	0	0	0	0	0	0	0	0	0	0	0	0	0	0	0	0	0	0.04944	0	0	0	0	0	0	0	0.08319	0	0	0	0	0
d__Bacteria|p__Firmicutes|c__Bacilli|o__Lactobacillales|f__Enterococcaceae|g__Enterococcus|s__Enterococcus_inusitatus	0	0	0	0	0	0	0	0	0	0	0	0	0	0	0	0	0	0	0	0	0	0	0	0	0	0	0	0	0	0	0	0	0	0	0	0	0	0	0	0	0	0	0	0	0	0	0	0	0
d__Bacteria|p__Firmicutes|c__Bacilli|o__Lactobacillales|f__Enterococcaceae|g__Enterococcus|s__Enterococcus_sp._326B3_12AGalle	0	0	0	0	0	0	0	0	0	0	0	0	0	0	0	0	0	0	0	0	0	0	0	0	0	0.17115	0	0	0	0	0	0	0.0415	0	0	0	0	0	0	0	0	0	0	0	0	0	0	0	0
d__Bacteria|p__Firmicutes|c__Bacilli|o__Lactobacillales|f__Enterococcaceae|g__Enterococcus|s__Enterococcus_unclassified	0	0	0	0	0	0	0	0	0	0	0	0	0	0	0	0	0	0	0	0	0	0	0	0	0	0	0	0	0.08136	0.02177	0	0	0	0	0	0	0	0	0	0	0	0	0	0	0	0	0	0	0
d__Bacteria|p__Firmicutes|c__Bacilli|o__Lactobacillales|f__Enterococcaceae|g__Vagococcus	0	0	0	0	0	0	0	0	0	0	0	0	0	0	0	0	0	0	0	0	0	0	0	0	0	0	0	0	0	0	0	0	0	0	0	0	0	0	0	0	0	0	0	0	0	0	0	0	0
d__Bacteria|p__Firmicutes|c__Bacilli|o__Lactobacillales|f__Enterococcaceae|g__Vagococcus|s__Vagococcus_sp._T282	0	0	0	0	0	0	0	0	0	0	0	0	0	0	0	0	0	0	0	0	0	0	0	0	0	0	0	0	0	0	0	0	0	0	0	0	0	0	0	0	0	0	0	0	0	0	0	0	0
d__Bacteria|p__Firmicutes|c__Bacilli|o__Lactobacillales|f__Lactobacillaceae	0.99796	0.03548	0	0	0	0	0.0049	0.01965	0.0475	0	0.0539	0	0	0	0	0.05297	0	0	0	0	0	0	0.01894	0.0053	0.10131	0	0	0	0	0.01452	0.1352	0.23124	3.98397	0.00672	0	0.23235	0	0.0047	0.13224	0	0.02228	0.36873	0.27574	0	0	0	0	0	0.01502
d__Bacteria|p__Firmicutes|c__Bacilli|o__Lactobacillales|f__Lactobacillaceae|g__HT002	0	0	0	0	0	0	0	0	0	0	0	0	0	0	0	0	0	0	0	0	0	0	0	0	0	0	0	0	0	0	0	0	0	0	0	0.09887	0	0	0	0	0	0	0	0	0	0	0	0	0
d__Bacteria|p__Firmicutes|c__Bacilli|o__Lactobacillales|f__Lactobacillaceae|g__HT002|s__HT002_unclassified	0	0	0	0	0	0	0	0	0	0	0	0	0	0	0	0	0	0	0	0	0	0	0	0	0	0	0	0	0	0	0	0	0	0	0	0.09887	0	0	0	0	0	0	0	0	0	0	0	0	0
d__Bacteria|p__Firmicutes|c__Bacilli|o__Lactobacillales|f__Lactobacillaceae|g__Lacticaseibacillus	0	0	0	0	0	0	0	0	0	0	0	0	0	0	0	0	0	0	0	0	0	0	0	0.0053	0	0	0	0	0	0	0	0	0	0	0	0	0	0	0	0	0	0	0.04876	0	0	0	0	0	0
d__Bacteria|p__Firmicutes|c__Bacilli|o__Lactobacillales|f__Lactobacillaceae|g__Lacticaseibacillus|s__Lacticaseibacillus_unclassified	0	0	0	0	0	0	0	0	0	0	0	0	0	0	0	0	0	0	0	0	0	0	0	0.0053	0	0	0	0	0	0	0	0	0	0	0	0	0	0	0	0	0	0	0.04876	0	0	0	0	0	0
d__Bacteria|p__Firmicutes|c__Bacilli|o__Lactobacillales|f__Lactobacillaceae|g__Lactiplantibacillus	0	0	0	0	0	0	0	0	0.03732	0	0	0	0	0	0	0	0	0	0	0	0	0	0	0	0	0	0	0	0	0	0	0	0	0	0	0.13348	0	0.0047	0	0	0	0.36873	0.08743	0	0	0	0	0	0.00501
d__Bacteria|p__Firmicutes|c__Bacilli|o__Lactobacillales|f__Lactobacillaceae|g__Lactiplantibacillus|s__Lactiplantibacillus_unclassified	0	0	0	0	0	0	0	0	0.03732	0	0	0	0	0	0	0	0	0	0	0	0	0	0	0	0	0	0	0	0	0	0	0	0	0	0	0.13348	0	0.0047	0	0	0	0.36873	0.08743	0	0	0	0	0	0.00501
d__Bacteria|p__Firmicutes|c__Bacilli|o__Lactobacillales|f__Lactobacillaceae|g__Lactobacillus	0.07362	0.03548	0	0	0	0	0	0	0	0	0.0539	0	0	0	0	0	0	0	0	0	0	0	0	0	0.01955	0	0	0	0	0.00726	0.05128	0.22003	3.98397	0.00672	0	0	0	0	0	0	0.01114	0	0.0454	0	0	0	0	0	0
d__Bacteria|p__Firmicutes|c__Bacilli|o__Lactobacillales|f__Lactobacillaceae|g__Lactobacillus|s__Lactobacillus_crispatus	0	0	0	0	0	0	0	0	0	0	0	0	0	0	0	0	0	0	0	0	0	0	0	0	0	0	0	0	0	0	0	0	0	0	0	0	0	0	0	0	0	0	0	0	0	0	0	0	0
d__Bacteria|p__Firmicutes|c__Bacilli|o__Lactobacillales|f__Lactobacillaceae|g__Lactobacillus|s__Lactobacillus_hominis	0	0	0	0	0	0	0	0	0	0	0	0	0	0	0	0	0	0	0	0	0	0	0	0	0	0	0	0	0	0	0	0	0	0	0	0	0	0	0	0	0.01114	0	0	0	0	0	0	0	0
d__Bacteria|p__Firmicutes|c__Bacilli|o__Lactobacillales|f__Lactobacillaceae|g__Lactobacillus|s__Lactobacillus_iners	0	0	0	0	0	0	0	0	0	0	0	0	0	0	0	0	0	0	0	0	0	0	0	0	0.01955	0	0	0	0	0	0	0	0	0.00672	0	0	0	0	0	0	0	0	0.0454	0	0	0	0	0	0
d__Bacteria|p__Firmicutes|c__Bacilli|o__Lactobacillales|f__Lactobacillaceae|g__Lactobacillus|s__Lactobacillus_jensenii	0	0	0	0	0	0	0	0	0	0	0	0	0	0	0	0	0	0	0	0	0	0	0	0	0	0	0	0	0	0	0	0	0	0	0	0	0	0	0	0	0	0	0	0	0	0	0	0	0
d__Bacteria|p__Firmicutes|c__Bacilli|o__Lactobacillales|f__Lactobacillaceae|g__Lactobacillus|s__Lactobacillus_sp._L-YJ	0.07362	0.03548	0	0	0	0	0	0	0	0	0	0	0	0	0	0	0	0	0	0	0	0	0	0	0	0	0	0	0	0.00726	0	0.00841	0	0	0	0	0	0	0	0	0	0	0	0	0	0	0	0	0
d__Bacteria|p__Firmicutes|c__Bacilli|o__Lactobacillales|f__Lactobacillaceae|g__Lactobacillus|s__Lactobacillus_taiwanensis	0	0	0	0	0	0	0	0	0	0	0	0	0	0	0	0	0	0	0	0	0	0	0	0	0	0	0	0	0	0	0	0	0	0	0	0	0	0	0	0	0	0	0	0	0	0	0	0	0
d__Bacteria|p__Firmicutes|c__Bacilli|o__Lactobacillales|f__Lactobacillaceae|g__Lactobacillus|s__uncultured_Lactobacillus_sp.	0	0	0	0	0	0	0	0	0	0	0.0539	0	0	0	0	0	0	0	0	0	0	0	0	0	0	0	0	0	0	0	0.05128	0.21162	3.98397	0	0	0	0	0	0	0	0	0	0	0	0	0	0	0	0
d__Bacteria|p__Firmicutes|c__Bacilli|o__Lactobacillales|f__Lactobacillaceae|g__Lentilactobacillus	0	0	0	0	0	0	0	0	0	0	0	0	0	0	0	0	0	0	0	0	0	0	0	0	0	0	0	0	0	0	0	0	0	0	0	0	0	0	0	0	0	0	0.05212	0	0	0	0	0	0
d__Bacteria|p__Firmicutes|c__Bacilli|o__Lactobacillales|f__Lactobacillaceae|g__Lentilactobacillus|s__Lentilactobacillus_unclassified	0	0	0	0	0	0	0	0	0	0	0	0	0	0	0	0	0	0	0	0	0	0	0	0	0	0	0	0	0	0	0	0	0	0	0	0	0	0	0	0	0	0	0.05212	0	0	0	0	0	0
d__Bacteria|p__Firmicutes|c__Bacilli|o__Lactobacillales|f__Lactobacillaceae|g__Leuconostoc	0	0	0	0	0	0	0	0	0	0	0	0	0	0	0	0	0	0	0	0	0	0	0	0	0	0	0	0	0	0	0	0	0	0	0	0	0	0	0	0	0	0	0.04203	0	0	0	0	0	0
d__Bacteria|p__Firmicutes|c__Bacilli|o__Lactobacillales|f__Lactobacillaceae|g__Leuconostoc|s__Leuconostoc_unclassified	0	0	0	0	0	0	0	0	0	0	0	0	0	0	0	0	0	0	0	0	0	0	0	0	0	0	0	0	0	0	0	0	0	0	0	0	0	0	0	0	0	0	0.04203	0	0	0	0	0	0
d__Bacteria|p__Firmicutes|c__Bacilli|o__Lactobacillales|f__Lactobacillaceae|g__Ligilactobacillus	0.92434	0	0	0	0	0	0.0049	0	0	0	0	0	0	0	0	0	0	0	0	0	0	0	0.01894	0	0	0	0	0	0	0.00726	0.01399	0.01121	0	0	0	0	0	0	0.13224	0	0.01114	0	0	0	0	0	0	0	0.01001
d__Bacteria|p__Firmicutes|c__Bacilli|o__Lactobacillales|f__Lactobacillaceae|g__Ligilactobacillus|s__Ligilactobacillus_unclassified	0.92434	0	0	0	0	0	0.0049	0	0	0	0	0	0	0	0	0	0	0	0	0	0	0	0.01894	0	0	0	0	0	0	0.00726	0.01399	0.01121	0	0	0	0	0	0	0.13224	0	0.01114	0	0	0	0	0	0	0	0.01001
d__Bacteria|p__Firmicutes|c__Bacilli|o__Lactobacillales|f__Lactobacillaceae|g__Limosilactobacillus	0	0	0	0	0	0	0	0	0	0	0	0	0	0	0	0.05297	0	0	0	0	0	0	0	0	0.00711	0	0	0	0	0	0	0	0	0	0	0	0	0	0	0	0	0	0	0	0	0	0	0	0
d__Bacteria|p__Firmicutes|c__Bacilli|o__Lactobacillales|f__Lactobacillaceae|g__Limosilactobacillus|s__Limosilactobacillus_unclassified	0	0	0	0	0	0	0	0	0	0	0	0	0	0	0	0.05297	0	0	0	0	0	0	0	0	0.00711	0	0	0	0	0	0	0	0	0	0	0	0	0	0	0	0	0	0	0	0	0	0	0	0
d__Bacteria|p__Firmicutes|c__Bacilli|o__Lactobacillales|f__Lactobacillaceae|g__Pediococcus	0	0	0	0	0	0	0	0	0	0	0	0	0	0	0	0	0	0	0	0	0	0	0	0	0.07465	0	0	0	0	0	0	0	0	0	0	0	0	0	0	0	0	0	0	0	0	0	0	0	0
d__Bacteria|p__Firmicutes|c__Bacilli|o__Lactobacillales|f__Lactobacillaceae|g__Pediococcus|s__Pediococcus_pentosaceus	0	0	0	0	0	0	0	0	0	0	0	0	0	0	0	0	0	0	0	0	0	0	0	0	0.07465	0	0	0	0	0	0	0	0	0	0	0	0	0	0	0	0	0	0	0	0	0	0	0	0
d__Bacteria|p__Firmicutes|c__Bacilli|o__Lactobacillales|f__Lactobacillaceae|g__Weissella	0	0	0	0	0	0	0	0.01965	0.01018	0	0	0	0	0	0	0	0	0	0	0	0	0	0	0	0	0	0	0	0	0	0.06993	0	0	0	0	0	0	0	0	0	0	0	0	0	0	0	0	0	0
d__Bacteria|p__Firmicutes|c__Bacilli|o__Lactobacillales|f__Lactobacillaceae|g__Weissella|s__Weissella_unclassified	0	0	0	0	0	0	0	0.01965	0.01018	0	0	0	0	0	0	0	0	0	0	0	0	0	0	0	0	0	0	0	0	0	0.06993	0	0	0	0	0	0	0	0	0	0	0	0	0	0	0	0	0	0
d__Bacteria|p__Firmicutes|c__Bacilli|o__Lactobacillales|f__Listeriaceae	0	0	0	0	0	0	0	0	0	0	0	0	0	0	0	0	0	0	0	0	0	0	0	0	0	0	0	0	0	0	0	0	0.17238	0	0	0	0	0	0	0	0	0	0.03026	0	0	0	0	0	0
d__Bacteria|p__Firmicutes|c__Bacilli|o__Lactobacillales|f__Listeriaceae|g__Brochothrix	0	0	0	0	0	0	0	0	0	0	0	0	0	0	0	0	0	0	0	0	0	0	0	0	0	0	0	0	0	0	0	0	0.17238	0	0	0	0	0	0	0	0	0	0.03026	0	0	0	0	0	0
d__Bacteria|p__Firmicutes|c__Bacilli|o__Lactobacillales|f__Listeriaceae|g__Brochothrix|s__Brochothrix_unclassified	0	0	0	0	0	0	0	0	0	0	0	0	0	0	0	0	0	0	0	0	0	0	0	0	0	0	0	0	0	0	0	0	0.17238	0	0	0	0	0	0	0	0	0	0.03026	0	0	0	0	0	0
d__Bacteria|p__Firmicutes|c__Bacilli|o__Lactobacillales|f__Streptococcaceae	4.80982	4.00937	0.2441	0.07869	0	0	1.19136	0.80704	0.10687	0.19823	0.05005	0.0558	0.06494	0.02789	1.11464	0.7018	0.32038	0.25455	0.01031	0.02477	0.027	0.03193	10.5738	6.28862	1.79879	3.7753	6.48171	2.01222	1.28657	0.06967	0.18803	0.0042	0.04309	0.01479	0.24524	0.04449	0.01628	0.03914	4.49631	0.13952	0.05572	0.03267	16.1595	15.4218	0.14162	1.26099	0.28926	0.28714	0.31539
d__Bacteria|p__Firmicutes|c__Bacilli|o__Lactobacillales|f__Streptococcaceae|g__Lactococcus	0	0	0	0.07869	0	0	0	0	0	0	0	0	0	0	0	0	0	0	0	0	0	0	0	0	0	0	0	0	0	0	0	0	0.02554	0	0	0	0	0	0	0	0	0	0	0	0	0	0	0	0
d__Bacteria|p__Firmicutes|c__Bacilli|o__Lactobacillales|f__Streptococcaceae|g__Lactococcus|s__Lactococcus_garvieae	0	0	0	0	0	0	0	0	0	0	0	0	0	0	0	0	0	0	0	0	0	0	0	0	0	0	0	0	0	0	0	0	0.02554	0	0	0	0	0	0	0	0	0	0	0	0	0	0	0	0
d__Bacteria|p__Firmicutes|c__Bacilli|o__Lactobacillales|f__Streptococcaceae|g__Lactococcus|s__Lactococcus_lactis	0	0	0	0.07869	0	0	0	0	0	0	0	0	0	0	0	0	0	0	0	0	0	0	0	0	0	0	0	0	0	0	0	0	0	0	0	0	0	0	0	0	0	0	0	0	0	0	0	0	0
d__Bacteria|p__Firmicutes|c__Bacilli|o__Lactobacillales|f__Streptococcaceae|g__Streptococcus	4.80982	4.00937	0.2441	0	0	0	1.19136	0.80704	0.10687	0.19823	0.05005	0.0558	0.06494	0.02789	1.11464	0.7018	0.32038	0.25455	0.01031	0.02477	0.027	0.03193	10.5738	6.28862	1.79879	3.7753	6.48171	2.01222	1.28657	0.06967	0.18803	0.0042	0.01755	0.01479	0.24524	0.04449	0.01628	0.03914	4.49631	0.13952	0.05572	0.03267	16.1595	15.4218	0.14162	1.26099	0.28926	0.28714	0.31539
d__Bacteria|p__Firmicutes|c__Bacilli|o__Lactobacillales|f__Streptococcaceae|g__Streptococcus|s__Streptococcus_australis	0	0	0	0	0	0	0	0.03778	0	0	0	0	0	0	0	0	0	0	0	0	0	0	0.62496	0.07954	0.40171	0	0.32106	0.07459	0.03027	0	0	0	0	0	0.04792	0	0	0	0	0	0	0	0.31441	0.49241	0	0	0.06982	0.26505	0.0801
d__Bacteria|p__Firmicutes|c__Bacilli|o__Lactobacillales|f__Streptococcaceae|g__Streptococcus|s__Streptococcus_constellatus	0	0.23418	0	0	0	0	0	0	0	0	0	0	0	0	0	0	0.10599	0.02633	0	0	0	0	0.12625	0	0	0	0.05327	0	0.01514	0	0	0	0	0	0	0	0	0	0.01556	0	0	0	0.05885	0.01073	0	0	0	0	0
d__Bacteria|p__Firmicutes|c__Bacilli|o__Lactobacillales|f__Streptococcaceae|g__Streptococcus|s__Streptococcus_cristatus	0	0	0	0	0	0	0	0	0	0	0	0	0	0	0	0	0	0	0	0	0	0	0	0	0	0	0.18573	0	0	0	0	0	0	0	0	0	0	0	0.0389	0	0	0	0	0.02415	0	0	0.01829	0	0
d__Bacteria|p__Firmicutes|c__Bacilli|o__Lactobacillales|f__Streptococcaceae|g__Streptococcus|s__Streptococcus_equinus	0	0	0	0	0	0	0.5304	0.27657	0.0475	0.02386	0	0	0	0	0	0	0	0	0	0	0	0	0	0	0	0.09061	0	0	0	0	0.01243	0	0	0	0	0	0	0	0	0	0	0	0	0	0	0	0.00665	0	0
d__Bacteria|p__Firmicutes|c__Bacilli|o__Lactobacillales|f__Streptococcaceae|g__Streptococcus|s__Streptococcus_iniae	0	0	0	0	0	0	0	0	0	0	0	0	0	0	0	0	0	0	0	0	0	0	0	0	0	0	0	0	0	0	0	0	0	0	0	0	0	0	0	0	0	0	0	0	0	0	0	0	0.00334
d__Bacteria|p__Firmicutes|c__Bacilli|o__Lactobacillales|f__Streptococcaceae|g__Streptococcus|s__Streptococcus_intermedius	0	0	0	0	0	0	0	0	0	0	0	0	0	0	0	0	0	0	0	0	0	0	0	0	0	0	0.02304	0	0	0	0	0	0	0	0	0	0	0	0.02593	0	0	0	0	0	0	0.04364	0	0	0
d__Bacteria|p__Firmicutes|c__Bacilli|o__Lactobacillales|f__Streptococcaceae|g__Streptococcus|s__Streptococcus_lactarius	0	0	0	0	0	0	0.01632	0	0	0	0	0	0	0	0	0	0	0	0	0	0	0	0	0	0	0	0	0	0	0	0	0	0	0	0	0	0	0	0	0	0	0	0	0	0	0	0	0	0
d__Bacteria|p__Firmicutes|c__Bacilli|o__Lactobacillales|f__Streptococcaceae|g__Streptococcus|s__Streptococcus_mitis	0	0	0	0	0	0	0	0	0	0	0	0	0	0	0	0	0	0	0	0	0	0	0	0	0	0	0	0	0	0	0	0	0	0	0	0	0	0	0	0	0	0	0	0	0	0	0.02327	0	0.02002
d__Bacteria|p__Firmicutes|c__Bacilli|o__Lactobacillales|f__Streptococcaceae|g__Streptococcus|s__Streptococcus_parasanguinis	0	0	0	0	0	0	0.04733	0	0	0.04956	0	0.02694	0	0	0.24079	0	0.0819	0	0	0	0	0	0	0.23861	0	0	0.17709	0	0	0.04064	0	0	0	0	0	0	0	0	0.65085	0	0	0	0.32786	0.53803	0	0.09508	0	0	0
d__Bacteria|p__Firmicutes|c__Bacilli|o__Lactobacillales|f__Streptococcaceae|g__Streptococcus|s__Streptococcus_pneumoniae	0	0	0	0	0	0	0	0	0	0	0	0	0	0	0	0	0	0.10972	0	0	0	0	0	0	0.02133	0	0	0.01243	0	0	0	0	0	0	0	0	0	0	0.4097	0	0	0	0	0.02147	0	0	0	0	0
d__Bacteria|p__Firmicutes|c__Bacilli|o__Lactobacillales|f__Streptococcaceae|g__Streptococcus|s__Streptococcus_rubneri	0.76892	0	0	0	0	0	0	0	0	0	0	0	0	0	0	0	0	0	0	0	0	0	0	0	0	0	0	0	0	0	0	0	0	0	0	0	0	0	0	0	0	0	0	0	0	0	0	0	0
d__Bacteria|p__Firmicutes|c__Bacilli|o__Lactobacillales|f__Streptococcaceae|g__Streptococcus|s__Streptococcus_salivarius	0	0	0	0	0	0	0	0	0	0	0	0	0	0	0	0	0	0	0	0	0	0	0	0	0	0	0	0	0	0	0	0	0	0	0	0	0	0	0	0	0	0	0	0	0	0	0	0	0
d__Bacteria|p__Firmicutes|c__Bacilli|o__Lactobacillales|f__Streptococcaceae|g__Streptococcus|s__Streptococcus_sp.	3.04294	3.12234	0.2441	0	0	0	0.45043	0.42317	0.05937	0.12481	0	0.00962	0.0345	0.02789	0.7702	0.65262	0.02891	0.08778	0.01031	0.02477	0.027	0.03193	8.65476	4.87288	1.25844	2.28531	4.69211	1.83995	1.05385	0	0.1756	0.0042	0.01117	0.00672	0.179	0.04449	0.01628	0.03914	2.80306	0	0.05572	0.03267	10.1049	12.0634	0.11765	0.8682	0.17123	0	0.21193
d__Bacteria|p__Firmicutes|c__Bacilli|o__Lactobacillales|f__Streptococcaceae|g__Streptococcus|s__Streptococcus_sp._I-G5	0.5726	0	0	0	0	0	0	0	0	0	0	0	0	0	0	0	0	0	0	0	0	0	0	0	0	0	0	0	0	0	0	0	0	0	0	0	0	0	0	0	0	0	0	0	0.02397	0	0	0	0
d__Bacteria|p__Firmicutes|c__Bacilli|o__Lactobacillales|f__Streptococcaceae|g__Streptococcus|s__Streptococcus_sp._S484	0	0	0	0	0	0	0	0	0	0	0	0	0	0	0	0	0.0819	0	0	0	0	0	0	0.18823	0	0	0	0	0	0	0	0	0	0	0	0	0	0	0	0	0	0	0	0	0	0	0	0	0
d__Bacteria|p__Firmicutes|c__Bacilli|o__Lactobacillales|f__Streptococcaceae|g__Streptococcus|s__Streptococcus_thermophilus	0	0	0	0	0	0	0	0	0	0	0	0	0	0	0	0	0	0	0	0	0	0	0	0.03181	0	0	0.02879	0	0	0.02903	0	0	0.00638	0.00807	0.01832	0	0	0	0	0	0	0	0	0	0	0	0	0	0
d__Bacteria|p__Firmicutes|c__Bacilli|o__Lactobacillales|f__Streptococcaceae|g__Streptococcus|s__Streptococcus_unclassified	0.19632	0.25546	0	0	0	0	0.11261	0.06952	0	0	0.01925	0.01924	0.03044	0	0.02392	0.04918	0.02168	0.03072	0	0	0	0	0.18938	0.55145	0	0	0.18141	0	0	0	0	0	0	0	0	0	0	0	0	0.11191	0	0	0.17654	0.08721	0	0	0	0	0
d__Bacteria|p__Firmicutes|c__Bacilli|o__Lactobacillales|f__Streptococcaceae|g__Streptococcus|s__uncultured_Streptococcus_sp.	0.22904	0.39739	0	0	0	0	0.03427	0	0	0	0.0308	0	0	0	0.07973	0	0	0	0	0	0	0	0.97847	0.3261	0.11731	1.39938	0.81921	0.08525	0.18731	0	0	0	0	0	0	0	0	0	0.55231	0.02761	0	0	5.17688	2.18433	0	0.25407	0	0.02209	0
d__Bacteria|p__Firmicutes|c__Bacilli|o__Mycoplasmatales	0	0	0	0	0	0	0	0	0	0.02386	0	0	0	0	0	0	0.04095	0	0	0	0	0	0	0	0	0	0	0	0	0	0	0	0	0	0	0	0	0	0	0	0	0	0	0	0	0	0	0	0
d__Bacteria|p__Firmicutes|c__Bacilli|o__Mycoplasmatales|f__Mycoplasmataceae	0	0	0	0	0	0	0	0	0	0.02386	0	0	0	0	0	0	0.04095	0	0	0	0	0	0	0	0	0	0	0	0	0	0	0	0	0	0	0	0	0	0	0	0	0	0	0	0	0	0	0	0
d__Bacteria|p__Firmicutes|c__Bacilli|o__Mycoplasmatales|f__Mycoplasmataceae|g__Mycoplasma	0	0	0	0	0	0	0	0	0	0.02386	0	0	0	0	0	0	0.04095	0	0	0	0	0	0	0	0	0	0	0	0	0	0	0	0	0	0	0	0	0	0	0	0	0	0	0	0	0	0	0	0
d__Bacteria|p__Firmicutes|c__Bacilli|o__Mycoplasmatales|f__Mycoplasmataceae|g__Mycoplasma|s__Mycoplasma_unclassified	0	0	0	0	0	0	0	0	0	0.02386	0	0	0	0	0	0	0.04095	0	0	0	0	0	0	0	0	0	0	0	0	0	0	0	0	0	0	0	0	0	0	0	0	0	0	0	0	0	0	0	0
d__Bacteria|p__Firmicutes|c__Bacilli|o__Paenibacillales	0.04908	0.24837	0.29803	0	0	0	0.0049	0	0.01696	0	0.0077	0	0	0	0	0.08512	0.01686	0	0	0	0	0	0	0.28368	0.14397	0	0	0	0	0	0.00777	0.13173	0	0.00403	0	0.00742	0.0293	0	0	0	0	0.5881	0.01009	0.00268	0	0	0	0	0
d__Bacteria|p__Firmicutes|c__Bacilli|o__Paenibacillales|f__Paenibacillaceae	0.04908	0.24837	0.29803	0	0	0	0.0049	0	0.01696	0	0.0077	0	0	0	0	0.08512	0.01686	0	0	0	0	0	0	0.28368	0.14397	0	0	0	0	0	0.00777	0.13173	0	0.00403	0	0.00742	0.0293	0	0	0	0	0.5881	0.01009	0.00268	0	0	0	0	0
d__Bacteria|p__Firmicutes|c__Bacilli|o__Paenibacillales|f__Paenibacillaceae|g__Ammoniibacillus	0	0	0	0	0	0	0	0	0	0	0	0	0	0	0	0	0	0	0	0	0	0	0	0.18028	0	0	0	0	0	0	0	0	0	0	0	0	0	0	0	0	0	0	0	0	0	0	0	0	0
d__Bacteria|p__Firmicutes|c__Bacilli|o__Paenibacillales|f__Paenibacillaceae|g__Ammoniibacillus|s__Ammoniibacillus_unclassified	0	0	0	0	0	0	0	0	0	0	0	0	0	0	0	0	0	0	0	0	0	0	0	0.18028	0	0	0	0	0	0	0	0	0	0	0	0	0	0	0	0	0	0	0	0	0	0	0	0	0
d__Bacteria|p__Firmicutes|c__Bacilli|o__Paenibacillales|f__Paenibacillaceae|g__Paenibacillaceae_unclassified	0.04908	0.24837	0.29803	0	0	0	0.0049	0	0.01696	0	0.0077	0	0	0	0	0.08512	0.01686	0	0	0	0	0	0	0	0.14397	0	0	0	0	0	0.00777	0.13173	0	0.00403	0	0.00742	0.0293	0	0	0	0	0	0.01009	0.00268	0	0	0	0	0
d__Bacteria|p__Firmicutes|c__Bacilli|o__Paenibacillales|f__Paenibacillaceae|g__Paenibacillaceae_unclassified|s__Paenibacillaceae_unclassified	0.04908	0.24837	0.29803	0	0	0	0.0049	0	0.01696	0	0.0077	0	0	0	0	0.08512	0.01686	0	0	0	0	0	0	0	0.14397	0	0	0	0	0	0.00777	0.13173	0	0.00403	0	0.00742	0.0293	0	0	0	0	0	0.01009	0.00268	0	0	0	0	0
d__Bacteria|p__Firmicutes|c__Bacilli|o__Paenibacillales|f__Paenibacillaceae|g__Paenibacillus	0	0	0	0	0	0	0	0	0	0	0	0	0	0	0	0	0	0	0	0	0	0	0	0	0	0	0	0	0	0	0	0	0	0	0	0	0	0	0	0	0	0.5881	0	0	0	0	0	0	0
d__Bacteria|p__Firmicutes|c__Bacilli|o__Paenibacillales|f__Paenibacillaceae|g__Paenibacillus|s__Paenibacillus_unclassified	0	0	0	0	0	0	0	0	0	0	0	0	0	0	0	0	0	0	0	0	0	0	0	0	0	0	0	0	0	0	0	0	0	0	0	0	0	0	0	0	0	0.5881	0	0	0	0	0	0	0
d__Bacteria|p__Firmicutes|c__Bacilli|o__Paenibacillales|f__Paenibacillaceae|g__Thermobacillus	0	0	0	0	0	0	0	0	0	0	0	0	0	0	0	0	0	0	0	0	0	0	0	0.1034	0	0	0	0	0	0	0	0	0	0	0	0	0	0	0	0	0	0	0	0	0	0	0	0	0
d__Bacteria|p__Firmicutes|c__Bacilli|o__Paenibacillales|f__Paenibacillaceae|g__Thermobacillus|s__Thermobacillus_unclassified	0	0	0	0	0	0	0	0	0	0	0	0	0	0	0	0	0	0	0	0	0	0	0	0.1034	0	0	0	0	0	0	0	0	0	0	0	0	0	0	0	0	0	0	0	0	0	0	0	0	0
d__Bacteria|p__Firmicutes|c__Bacilli|o__RF39	0	0	0	0	0	0	0	0.00453	0	0	0	0	0	0	0	0	0	0	0	0	0	0	0	0	0	0	0	0	0	0	0	0	0	0	0	0	0	0	0	0	0	0	0	0	0	0	0	0	0
d__Bacteria|p__Firmicutes|c__Bacilli|o__RF39|f__RF39_unclassified	0	0	0	0	0	0	0	0.00453	0	0	0	0	0	0	0	0	0	0	0	0	0	0	0	0	0	0	0	0	0	0	0	0	0	0	0	0	0	0	0	0	0	0	0	0	0	0	0	0	0
d__Bacteria|p__Firmicutes|c__Bacilli|o__RF39|f__RF39_unclassified|g__RF39_unclassified	0	0	0	0	0	0	0	0.00453	0	0	0	0	0	0	0	0	0	0	0	0	0	0	0	0	0	0	0	0	0	0	0	0	0	0	0	0	0	0	0	0	0	0	0	0	0	0	0	0	0
d__Bacteria|p__Firmicutes|c__Bacilli|o__RF39|f__RF39_unclassified|g__RF39_unclassified|s__RF39_unclassified	0	0	0	0	0	0	0	0.00453	0	0	0	0	0	0	0	0	0	0	0	0	0	0	0	0	0	0	0	0	0	0	0	0	0	0	0	0	0	0	0	0	0	0	0	0	0	0	0	0	0
d__Bacteria|p__Firmicutes|c__Bacilli|o__Staphylococcales	0.15542	0.53931	0	0	0	0.01225	0.01306	0.03325	0.02714	0.02937	0	0.10391	0	0.00797	0.04305	0.27997	0.1084	0.0373	0	0	0.03544	0	4.00228	0.32079	0.19729	0.08054	0.87536	0.36941	0.0246	0.2656	0.02331	0.13033	0.26815	0.02017	0.05215	0.04449	0	0.00313	0.26189	0.07413	0.18668	0.38273	0.51954	0.15027	0	0.28213	0.04156	0	0.03671
d__Bacteria|p__Firmicutes|c__Bacilli|o__Staphylococcales|f__Gemellaceae	0	0.35481	0	0	0	0	0.0049	0.0272	0	0	0	0	0	0	0.03827	0.11161	0.03372	0.01536	0	0	0.01688	0	1.37618	0.26247	0.07465	0.08054	0.87536	0.36941	0.0246	0	0	0	0.03671	0.00269	0.05215	0.04449	0	0.00313	0.22559	0	0.02508	0	0.26902	0.14759	0	0.06235	0.03824	0	0.03671
d__Bacteria|p__Firmicutes|c__Bacilli|o__Staphylococcales|f__Gemellaceae|g__Gemella	0	0.35481	0	0	0	0	0.0049	0.0272	0	0	0	0	0	0	0.03827	0.11161	0.03372	0.01536	0	0	0.01688	0	1.37618	0.26247	0.07465	0.08054	0.87536	0.36941	0.0246	0	0	0	0.03671	0.00269	0.05215	0.04449	0	0.00313	0.22559	0	0.02508	0	0.26902	0.14759	0	0.06235	0.03824	0	0.03671
d__Bacteria|p__Firmicutes|c__Bacilli|o__Staphylococcales|f__Gemellaceae|g__Gemella|s__Gemella_unclassified	0	0.35481	0	0	0	0	0.0049	0.0272	0	0	0	0	0	0	0.03827	0.11161	0.03372	0.01536	0	0	0.01688	0	1.37618	0.26247	0.07465	0.08054	0.87536	0.36941	0.0246	0	0	0	0.03671	0.00269	0.05215	0.04449	0	0.00313	0.22559	0	0.02508	0	0.26902	0.14759	0	0.06235	0.03824	0	0.03671
d__Bacteria|p__Firmicutes|c__Bacilli|o__Staphylococcales|f__Staphylococcaceae	0.15542	0.1845	0	0	0	0.01225	0.00816	0.00605	0.02714	0.02937	0	0.10391	0	0.00797	0.00478	0.16836	0.07468	0.02194	0	0	0.01856	0	2.6261	0.05832	0.12264	0	0	0	0	0.2656	0.02331	0.13033	0.23144	0.01748	0	0	0	0	0.0363	0.07413	0.1616	0.38273	0.25052	0.00268	0	0.21978	0.00332	0	0
d__Bacteria|p__Firmicutes|c__Bacilli|o__Staphylococcales|f__Staphylococcaceae|g__Jeotgalicoccus	0	0	0	0	0	0	0	0	0	0.02019	0	0	0	0	0	0	0.00482	0	0	0	0	0	0	0.02651	0	0	0	0	0	0	0	0	0	0	0	0	0	0	0	0	0	0	0	0	0	0	0	0	0
d__Bacteria|p__Firmicutes|c__Bacilli|o__Staphylococcales|f__Staphylococcaceae|g__Jeotgalicoccus|s__Jeotgalicoccus_unclassified	0	0	0	0	0	0	0	0	0	0.02019	0	0	0	0	0	0	0.00482	0	0	0	0	0	0	0.02651	0	0	0	0	0	0	0	0	0	0	0	0	0	0	0	0	0	0	0	0	0	0	0	0	0
d__Bacteria|p__Firmicutes|c__Bacilli|o__Staphylococcales|f__Staphylococcaceae|g__Macrococcus	0	0	0	0	0	0	0	0	0	0	0	0	0	0	0	0	0	0	0	0	0	0	0	0	0	0	0	0	0	0	0	0	0.19952	0	0	0	0	0	0	0	0	0	0	0	0	0	0	0	0
d__Bacteria|p__Firmicutes|c__Bacilli|o__Staphylococcales|f__Staphylococcaceae|g__Macrococcus|s__Macrococcus_unclassified	0	0	0	0	0	0	0	0	0	0	0	0	0	0	0	0	0	0	0	0	0	0	0	0	0	0	0	0	0	0	0	0	0.19952	0	0	0	0	0	0	0	0	0	0	0	0	0	0	0	0
d__Bacteria|p__Firmicutes|c__Bacilli|o__Staphylococcales|f__Staphylococcaceae|g__Salinicoccus	0	0	0	0	0	0	0	0	0	0	0	0	0	0	0	0	0	0	0	0	0	0	0	0	0	0	0	0	0	0	0	0	0	0	0	0	0	0	0	0.01163	0	0	0	0	0	0	0	0	0
d__Bacteria|p__Firmicutes|c__Bacilli|o__Staphylococcales|f__Staphylococcaceae|g__Salinicoccus|s__Salinicoccus_unclassified	0	0	0	0	0	0	0	0	0	0	0	0	0	0	0	0	0	0	0	0	0	0	0	0	0	0	0	0	0	0	0	0	0	0	0	0	0	0	0	0.01163	0	0	0	0	0	0	0	0	0
d__Bacteria|p__Firmicutes|c__Bacilli|o__Staphylococcales|f__Staphylococcaceae|g__Staphylococcaceae_unclassified	0	0	0	0	0	0	0	0	0	0	0	0	0	0	0	0	0	0	0	0	0	0	0	0	0	0	0	0	0	0	0	0	0	0	0	0	0	0	0	0	0	0	0	0	0	0	0	0	0
d__Bacteria|p__Firmicutes|c__Bacilli|o__Staphylococcales|f__Staphylococcaceae|g__Staphylococcaceae_unclassified|s__Staphylococcaceae_unclassified	0	0	0	0	0	0	0	0	0	0	0	0	0	0	0	0	0	0	0	0	0	0	0	0	0	0	0	0	0	0	0	0	0	0	0	0	0	0	0	0	0	0	0	0	0	0	0	0	0
d__Bacteria|p__Firmicutes|c__Bacilli|o__Staphylococcales|f__Staphylococcaceae|g__Staphylococcus	0.15542	0.1845	0	0	0	0.01225	0.00816	0.00605	0.02714	0.00918	0	0.10391	0	0.00797	0.00478	0.16836	0.06986	0.02194	0	0	0.01856	0	2.6261	0.03181	0.12264	0	0	0	0	0.2656	0.02331	0.13033	0.03192	0.01748	0	0	0	0	0.0363	0.0625	0.1616	0.38273	0.25052	0.00268	0	0.21978	0.00332	0	0
d__Bacteria|p__Firmicutes|c__Bacilli|o__Staphylococcales|f__Staphylococcaceae|g__Staphylococcus|s__Staphylococcus_unclassified	0.15542	0.1845	0	0	0	0.01225	0.00816	0.00605	0.02714	0.00918	0	0.10391	0	0.00797	0.00478	0.16836	0.06986	0.02194	0	0	0.01856	0	2.6261	0.03181	0.12264	0	0	0	0	0.2656	0.02331	0.13033	0.03192	0.01748	0	0	0	0	0.0363	0.0625	0.1616	0.38273	0.25052	0.00268	0	0.21978	0.00332	0	0
d__Bacteria|p__Firmicutes|c__Bacilli|o__Thermoactinomycetales	0	0	0	0	0	0	0	0	0	0	0	0	0	0	0	0	0	0	0	0	0	0	0	0.00795	0	0	0	0	0	0	0	0	0	0.0363	0	0	0	0	0	0	0	0	0.03194	0	0	0	0	0	0
d__Bacteria|p__Firmicutes|c__Bacilli|o__Thermoactinomycetales|f__Thermoactinomycetaceae	0	0	0	0	0	0	0	0	0	0	0	0	0	0	0	0	0	0	0	0	0	0	0	0.00795	0	0	0	0	0	0	0	0	0	0.0363	0	0	0	0	0	0	0	0	0.03194	0	0	0	0	0	0
d__Bacteria|p__Firmicutes|c__Bacilli|o__Thermoactinomycetales|f__Thermoactinomycetaceae|g__Kroppenstedtia	0	0	0	0	0	0	0	0	0	0	0	0	0	0	0	0	0	0	0	0	0	0	0	0	0	0	0	0	0	0	0	0	0	0	0	0	0	0	0	0	0	0	0.01345	0	0	0	0	0	0
d__Bacteria|p__Firmicutes|c__Bacilli|o__Thermoactinomycetales|f__Thermoactinomycetaceae|g__Kroppenstedtia|s__Kroppenstedtia_unclassified	0	0	0	0	0	0	0	0	0	0	0	0	0	0	0	0	0	0	0	0	0	0	0	0	0	0	0	0	0	0	0	0	0	0	0	0	0	0	0	0	0	0	0.01345	0	0	0	0	0	0
d__Bacteria|p__Firmicutes|c__Bacilli|o__Thermoactinomycetales|f__Thermoactinomycetaceae|g__Novibacillus	0	0	0	0	0	0	0	0	0	0	0	0	0	0	0	0	0	0	0	0	0	0	0	0.00795	0	0	0	0	0	0	0	0	0	0.0121	0	0	0	0	0	0	0	0	0.01849	0	0	0	0	0	0
d__Bacteria|p__Firmicutes|c__Bacilli|o__Thermoactinomycetales|f__Thermoactinomycetaceae|g__Novibacillus|s__Novibacillus_unclassified	0	0	0	0	0	0	0	0	0	0	0	0	0	0	0	0	0	0	0	0	0	0	0	0.00795	0	0	0	0	0	0	0	0	0	0.0121	0	0	0	0	0	0	0	0	0.01849	0	0	0	0	0	0
d__Bacteria|p__Firmicutes|c__Bacilli|o__Thermoactinomycetales|f__Thermoactinomycetaceae|g__Planifilum	0	0	0	0	0	0	0	0	0	0	0	0	0	0	0	0	0	0	0	0	0	0	0	0	0	0	0	0	0	0	0	0	0	0.00538	0	0	0	0	0	0	0	0	0	0	0	0	0	0	0
d__Bacteria|p__Firmicutes|c__Bacilli|o__Thermoactinomycetales|f__Thermoactinomycetaceae|g__Planifilum|s__Planifilum_unclassified	0	0	0	0	0	0	0	0	0	0	0	0	0	0	0	0	0	0	0	0	0	0	0	0	0	0	0	0	0	0	0	0	0	0.00538	0	0	0	0	0	0	0	0	0	0	0	0	0	0	0
d__Bacteria|p__Firmicutes|c__Bacilli|o__Thermoactinomycetales|f__Thermoactinomycetaceae|g__Thermoactinomyces	0	0	0	0	0	0	0	0	0	0	0	0	0	0	0	0	0	0	0	0	0	0	0	0	0	0	0	0	0	0	0	0	0	0.01882	0	0	0	0	0	0	0	0	0	0	0	0	0	0	0
d__Bacteria|p__Firmicutes|c__Bacilli|o__Thermoactinomycetales|f__Thermoactinomycetaceae|g__Thermoactinomyces|s__Thermoactinomyces_unclassified	0	0	0	0	0	0	0	0	0	0	0	0	0	0	0	0	0	0	0	0	0	0	0	0	0	0	0	0	0	0	0	0	0	0.01882	0	0	0	0	0	0	0	0	0	0	0	0	0	0	0
d__Bacteria|p__Firmicutes|c__Clostridia	13.3661	7.87682	16.6075	17.8983	15.3466	10.3857	3.16441	3.29766	13.0023	11.3317	29.8198	35.6431	28.3772	26.6991	31.6977	43.5438	41.4521	35.2308	23.0811	27.2433	8.66595	11.6893	7.48057	5.7292	13.2457	5.72836	3.7131	15.9592	9.05893	13.3467	27.5105	36.8757	6.86822	1.68203	0.96691	2.81044	28.4386	38.2543	1.63363	0.21511	1.48227	3.2252	2.80448	1.29208	13.9455	11.829	10.5862	11.7701	10.3311
d__Bacteria|p__Firmicutes|c__Clostridia|o__Caldicoprobacterales	0	0	0	0	0	0	0	0	0	0	0	0	0	0	0	0	0	0	0	0	0	0	0	0	0	0	0	0	0	0	0	0	0	0	0	0	0	0	0	0	0	0.02334	0	0	0	0	0	0.00552	0
d__Bacteria|p__Firmicutes|c__Clostridia|o__Caldicoprobacterales|f__Caldicoprobacteraceae	0	0	0	0	0	0	0	0	0	0	0	0	0	0	0	0	0	0	0	0	0	0	0	0	0	0	0	0	0	0	0	0	0	0	0	0	0	0	0	0	0	0.02334	0	0	0	0	0	0.00552	0
d__Bacteria|p__Firmicutes|c__Clostridia|o__Caldicoprobacterales|f__Caldicoprobacteraceae|g__Caldicoprobacter	0	0	0	0	0	0	0	0	0	0	0	0	0	0	0	0	0	0	0	0	0	0	0	0	0	0	0	0	0	0	0	0	0	0	0	0	0	0	0	0	0	0.02334	0	0	0	0	0	0.00552	0
d__Bacteria|p__Firmicutes|c__Clostridia|o__Caldicoprobacterales|f__Caldicoprobacteraceae|g__Caldicoprobacter|s__Caldicoprobacter_unclassified	0	0	0	0	0	0	0	0	0	0	0	0	0	0	0	0	0	0	0	0	0	0	0	0	0	0	0	0	0	0	0	0	0	0	0	0	0	0	0	0	0	0.02334	0	0	0	0	0	0.00552	0
d__Bacteria|p__Firmicutes|c__Clostridia|o__Christensenellales	2.54397	0	0.09651	0	0	0.03214	0.01142	0	0.39186	0.45518	0.00385	0	0	0	0.1483	0	0	0	0.01031	0.04788	0.04388	0.00504	0	0	0.02844	0	0	0	0	0	0.01088	1.07769	0	0	0	0	0	0.01566	0	0	0	0	0	0	0	0	0.01164	0	0
d__Bacteria|p__Firmicutes|c__Clostridia|o__Christensenellales|f__Christensenellaceae	2.54397	0	0.09651	0	0	0.03214	0.01142	0	0.39186	0.45518	0.00385	0	0	0	0.1483	0	0	0	0.01031	0.04788	0.04388	0.00504	0	0	0.02844	0	0	0	0	0	0.01088	1.07769	0	0	0	0	0	0.01566	0	0	0	0	0	0	0	0	0.01164	0	0
d__Bacteria|p__Firmicutes|c__Clostridia|o__Christensenellales|f__Christensenellaceae|g__Catabacter	0	0	0	0	0	0	0	0	0	0	0	0	0	0	0.03987	0	0	0	0	0	0	0	0	0	0	0	0	0	0	0	0	0	0	0	0	0	0	0	0	0	0	0	0	0	0	0	0	0	0
d__Bacteria|p__Firmicutes|c__Clostridia|o__Christensenellales|f__Christensenellaceae|g__Catabacter|s__Catabacter_unclassified	0	0	0	0	0	0	0	0	0	0	0	0	0	0	0.03987	0	0	0	0	0	0	0	0	0	0	0	0	0	0	0	0	0	0	0	0	0	0	0	0	0	0	0	0	0	0	0	0	0	0
d__Bacteria|p__Firmicutes|c__Clostridia|o__Christensenellales|f__Christensenellaceae|g__Christensenella	0	0	0	0	0	0	0	0	0	0	0	0	0	0	0.059	0	0	0	0	0	0	0	0	0	0	0	0	0	0	0	0	0	0	0	0	0	0	0	0	0	0	0	0	0	0	0	0	0	0
d__Bacteria|p__Firmicutes|c__Clostridia|o__Christensenellales|f__Christensenellaceae|g__Christensenellaceae_R-7_group	2.54397	0	0.09651	0	0	0.03214	0.01142	0	0.35284	0.4405	0.00385	0	0	0	0	0	0	0	0.01031	0.04788	0.04388	0.00504	0	0	0.02844	0	0	0	0	0	0.01088	1.07769	0	0	0	0	0	0.01566	0	0	0	0	0	0	0	0	0.01164	0	0
d__Bacteria|p__Firmicutes|c__Clostridia|o__Christensenellales|f__Christensenellaceae|g__Christensenellaceae_R-7_group|s__Christensenellaceae_R-7_group_unclassified	2.54397	0	0.09651	0	0	0.03214	0.01142	0	0.35284	0.4405	0.00385	0	0	0	0	0	0	0	0.01031	0.04788	0.04388	0.00504	0	0	0.02844	0	0	0	0	0	0.01088	1.07769	0	0	0	0	0	0.01566	0	0	0	0	0	0	0	0	0.01164	0	0
d__Bacteria|p__Firmicutes|c__Clostridia|o__Christensenellales|f__Christensenellaceae|g__Christensenellaceae_unclassified	0	0	0	0	0	0	0	0	0.03902	0.01468	0	0	0	0	0.04943	0	0	0	0	0	0	0	0	0	0	0	0	0	0	0	0	0	0	0	0	0	0	0	0	0	0	0	0	0	0	0	0	0	0
d__Bacteria|p__Firmicutes|c__Clostridia|o__Christensenellales|f__Christensenellaceae|g__Christensenellaceae_unclassified|s__Christensenellaceae_unclassified	0	0	0	0	0	0	0	0	0.03902	0.01468	0	0	0	0	0.04943	0	0	0	0	0	0	0	0	0	0	0	0	0	0	0	0	0	0	0	0	0	0	0	0	0	0	0	0	0	0	0	0	0	0
d__Bacteria|p__Firmicutes|c__Clostridia|o__Christensenellales|f__Christensenellaceae|g__Christensenella|s__Christensenella_unclassified	0	0	0	0	0	0	0	0	0	0	0	0	0	0	0.059	0	0	0	0	0	0	0	0	0	0	0	0	0	0	0	0	0	0	0	0	0	0	0	0	0	0	0	0	0	0	0	0	0	0
d__Bacteria|p__Firmicutes|c__Clostridia|o__Clostridia_UCG-014	0	0.34772	0	0	0	0	0.11424	0.16775	0	0.00551	0.00577	0	0	0	0.05262	0.06999	0	0	0	0	0.01856	0	0.96585	0.15642	0.02311	0	0.13534	0.08702	0.02838	0	0	0.00701	0	0	0.0451	0.00494	0	0	0	0.02471	0	0	0.04035	0	0.12854	0.02182	0	0.01104	0
d__Bacteria|p__Firmicutes|c__Clostridia|o__Clostridia_UCG-014|f__Clostridia_UCG-014_unclassified	0	0.34772	0	0	0	0	0.11424	0.16775	0	0.00551	0.00577	0	0	0	0.05262	0.06999	0	0	0	0	0.01856	0	0.96585	0.15642	0.02311	0	0.13534	0.08702	0.02838	0	0	0.00701	0	0	0.0451	0.00494	0	0	0	0.02471	0	0	0.04035	0	0.12854	0.02182	0	0.01104	0
d__Bacteria|p__Firmicutes|c__Clostridia|o__Clostridia_UCG-014|f__Clostridia_UCG-014_unclassified|g__Clostridia_UCG-014_unclassified	0	0.34772	0	0	0	0	0.11424	0.16775	0	0.00551	0.00577	0	0	0	0.05262	0.06999	0	0	0	0	0.01856	0	0.96585	0.15642	0.02311	0	0.13534	0.08702	0.02838	0	0	0.00701	0	0	0.0451	0.00494	0	0	0	0.02471	0	0	0.04035	0	0.12854	0.02182	0	0.01104	0
d__Bacteria|p__Firmicutes|c__Clostridia|o__Clostridia_UCG-014|f__Clostridia_UCG-014_unclassified|g__Clostridia_UCG-014_unclassified|s__Clostridia_UCG-014_unclassified	0	0.34772	0	0	0	0	0.11424	0.16775	0	0.00551	0.00577	0	0	0	0.05262	0.06999	0	0	0	0	0.01856	0	0.96585	0.15642	0.02311	0	0.13534	0.08702	0.02838	0	0	0.00701	0	0	0.0451	0.00494	0	0	0	0.02471	0	0	0.04035	0	0.12854	0.02182	0	0.01104	0
d__Bacteria|p__Firmicutes|c__Clostridia|o__Clostridia_unclassified	0	0	0	0	0	0	0	0	0	0	0	0	0	0	0	0	0	0	0	0	0	0	0	0	0	0	0	0	0	0	0	0	0	0	0	0	0	0	0	0	0	0	0	0	0	0	0	0	0
d__Bacteria|p__Firmicutes|c__Clostridia|o__Clostridia_unclassified|f__Clostridia_unclassified	0	0	0	0	0	0	0	0	0	0	0	0	0	0	0	0	0	0	0	0	0	0	0	0	0	0	0	0	0	0	0	0	0	0	0	0	0	0	0	0	0	0	0	0	0	0	0	0	0
d__Bacteria|p__Firmicutes|c__Clostridia|o__Clostridia_unclassified|f__Clostridia_unclassified|g__Clostridia_unclassified	0	0	0	0	0	0	0	0	0	0	0	0	0	0	0	0	0	0	0	0	0	0	0	0	0	0	0	0	0	0	0	0	0	0	0	0	0	0	0	0	0	0	0	0	0	0	0	0	0
d__Bacteria|p__Firmicutes|c__Clostridia|o__Clostridia_unclassified|f__Clostridia_unclassified|g__Clostridia_unclassified|s__Clostridia_unclassified	0	0	0	0	0	0	0	0	0	0	0	0	0	0	0	0	0	0	0	0	0	0	0	0	0	0	0	0	0	0	0	0	0	0	0	0	0	0	0	0	0	0	0	0	0	0	0	0	0
d__Bacteria|p__Firmicutes|c__Clostridia|o__Clostridia_vadinBB60_group	0	0	0.12205	0	0	0	0	0	0	0	0	0	0	0	0	0	0	0	0.00344	0	0	0	0	0	0.00355	0	0	0	0	0	0	0	0	0	0	0	0	0	0	0	0	0	0	0	0.59041	0	0	0	0
d__Bacteria|p__Firmicutes|c__Clostridia|o__Clostridia_vadinBB60_group|f__Clostridia_vadinBB60_group_unclassified	0	0	0.12205	0	0	0	0	0	0	0	0	0	0	0	0	0	0	0	0.00344	0	0	0	0	0	0.00355	0	0	0	0	0	0	0	0	0	0	0	0	0	0	0	0	0	0	0	0.59041	0	0	0	0
d__Bacteria|p__Firmicutes|c__Clostridia|o__Clostridia_vadinBB60_group|f__Clostridia_vadinBB60_group_unclassified|g__Clostridia_vadinBB60_group_unclassified	0	0	0.12205	0	0	0	0	0	0	0	0	0	0	0	0	0	0	0	0.00344	0	0	0	0	0	0.00355	0	0	0	0	0	0	0	0	0	0	0	0	0	0	0	0	0	0	0	0.59041	0	0	0	0
d__Bacteria|p__Firmicutes|c__Clostridia|o__Clostridia_vadinBB60_group|f__Clostridia_vadinBB60_group_unclassified|g__Clostridia_vadinBB60_group_unclassified|s__Clostridia_vadinBB60_group_unclassified	0	0	0.12205	0	0	0	0	0	0	0	0	0	0	0	0	0	0	0	0.00344	0	0	0	0	0	0.00355	0	0	0	0	0	0	0	0	0	0	0	0	0	0	0	0	0	0	0	0.59041	0	0	0	0
d__Bacteria|p__Firmicutes|c__Clostridia|o__Clostridiales	1.10429	0.23418	0.79476	1.44502	0.30831	0.25714	0.01142	0.0136	1.04495	1.1563	2.71789	4.06597	2.75613	2.45997	0.79092	1.53224	5.16464	4.97466	0.74742	1.48756	0.90962	0.47563	1.12997	0.79271	5.68433	3.60415	0.77601	6.85007	1.65173	4.70822	2.63871	1.948	0.98322	0.21781	0.07894	0.12359	1.76937	2.86676	0.0752	0.02761	0.00557	0.39206	0.95165	0.91103	3.92811	5.78591	5.48094	5.6048	5.17137
d__Bacteria|p__Firmicutes|c__Clostridia|o__Clostridiales|f__Christensenellaceae	0	0	0	0	0	0	0	0	0	0	0	0	0	0	0	0	0	0	0	0	0	0	0	0	0	0	0	0	0	0	0	0.00981	0	0	0	0	0	0	0	0	0	0	0	0	0	0	0	0	0
d__Bacteria|p__Firmicutes|c__Clostridia|o__Clostridiales|f__Christensenellaceae|g__Christensenella	0	0	0	0	0	0	0	0	0	0	0	0	0	0	0	0	0	0	0	0	0	0	0	0	0	0	0	0	0	0	0	0.00981	0	0	0	0	0	0	0	0	0	0	0	0	0	0	0	0	0
d__Bacteria|p__Firmicutes|c__Clostridia|o__Clostridiales|f__Christensenellaceae|g__Christensenella|s__Christensenella_sp._AF73-05CM02	0	0	0	0	0	0	0	0	0	0	0	0	0	0	0	0	0	0	0	0	0	0	0	0	0	0	0	0	0	0	0	0.00981	0	0	0	0	0	0	0	0	0	0	0	0	0	0	0	0	0
d__Bacteria|p__Firmicutes|c__Clostridia|o__Clostridiales|f__Clostridiaceae	0	0.03548	0.07948	0	0	0	0	0.01058	0.08142	0.09177	0.12319	0.06735	0.19687	0.13346	0.17381	0.0908	0.12285	0.1558	0.04639	0.246	0.02194	0.04874	0.82065	0.17233	3.79311	1.61079	0.6306	5.81643	0.58085	3.90561	0.32012	0.61803	0.11651	0.0121	0.00705	0	0	0.01566	0	0	0.00557	0.014	0.62042	0.63329	0.35729	0.26187	0.43389	0.33132	0.4272
d__Bacteria|p__Firmicutes|c__Clostridia|o__Clostridiales|f__Clostridiaceae|g__Clostridium	0	0.03548	0.07948	0	0	0	0	0	0.08142	0.09177	0.11549	0.0558	0.18469	0.13346	0.12597	0.03594	0.03613	0.08997	0.04639	0.246	0.02194	0.04874	0.72596	0.01591	0.31817	0	0.04031	0.63936	0.46165	3.86642	0.32012	0	0.09736	0.00403	0.00705	0	0	0	0	0	0	0.014	0	0	0.34422	0.24472	0.41228	0.33132	0.41218
d__Bacteria|p__Firmicutes|c__Clostridia|o__Clostridiales|f__Clostridiaceae|g__Clostridium_sensu_stricto_1	0	0	0	0	0	0	0	0.00453	0	0	0.0077	0.01155	0.01218	0	0.04784	0.05486	0.08672	0.06583	0	0	0	0	0.09469	0.15112	3.47494	1.61079	0.59029	5.17707	0.1192	0.03919	0	0.61803	0.01915	0.00807	0	0	0	0.01566	0	0	0	0	0.62042	0.45887	0.01307	0.01715	0.02161	0	0.01502
d__Bacteria|p__Firmicutes|c__Clostridia|o__Clostridiales|f__Clostridiaceae|g__Clostridium_sensu_stricto_10	0	0	0	0	0	0	0	0	0	0	0	0	0	0	0	0	0	0	0	0	0	0	0	0	0	0	0	0	0	0	0	0	0	0	0	0	0	0	0	0	0	0	0	0	0	0	0	0	0
d__Bacteria|p__Firmicutes|c__Clostridia|o__Clostridiales|f__Clostridiaceae|g__Clostridium_sensu_stricto_10|s__Clostridium_sensu_stricto_10_unclassified	0	0	0	0	0	0	0	0	0	0	0	0	0	0	0	0	0	0	0	0	0	0	0	0	0	0	0	0	0	0	0	0	0	0	0	0	0	0	0	0	0	0	0	0	0	0	0	0	0
d__Bacteria|p__Firmicutes|c__Clostridia|o__Clostridiales|f__Clostridiaceae|g__Clostridium_sensu_stricto_13	0	0	0	0	0	0	0	0	0	0	0	0	0	0	0	0	0	0	0	0	0	0	0	0	0	0	0	0	0	0	0	0	0	0	0	0	0	0	0	0	0	0	0	0.17442	0	0	0	0	0
d__Bacteria|p__Firmicutes|c__Clostridia|o__Clostridiales|f__Clostridiaceae|g__Clostridium_sensu_stricto_13|s__Clostridium_sensu_stricto_13_unclassified	0	0	0	0	0	0	0	0	0	0	0	0	0	0	0	0	0	0	0	0	0	0	0	0	0	0	0	0	0	0	0	0	0	0	0	0	0	0	0	0	0	0	0	0.17442	0	0	0	0	0
d__Bacteria|p__Firmicutes|c__Clostridia|o__Clostridiales|f__Clostridiaceae|g__Clostridium_sensu_stricto_1|s__Clostridium_sensu_stricto_1_unclassified	0	0	0	0	0	0	0	0.00453	0	0	0.0077	0.01155	0.01218	0	0.04784	0.05486	0.08672	0.06583	0	0	0	0	0.09469	0.15112	3.47494	1.61079	0.59029	5.17707	0.1192	0.03919	0	0.61803	0.01915	0.00807	0	0	0	0.01566	0	0	0	0	0.62042	0.45887	0.01307	0.01715	0.02161	0	0.01502
d__Bacteria|p__Firmicutes|c__Clostridia|o__Clostridiales|f__Clostridiaceae|g__Clostridium|s__Clostridium_sp._A9	0	0	0	0	0	0	0	0	0	0	0	0	0	0	0	0	0	0	0	0	0	0	0	0	0	0	0	0	0	0	0	0	0	0	0	0	0	0	0	0	0	0	0	0	0.05447	0	0	0	0
d__Bacteria|p__Firmicutes|c__Clostridia|o__Clostridiales|f__Clostridiaceae|g__Clostridium|s__Clostridium_sp._AT4	0	0	0	0	0	0	0	0	0	0.0257	0	0	0	0	0	0	0.03613	0.08558	0.04639	0.246	0.02194	0.04874	0	0	0	0	0	0	0	0	0.02486	0	0	0	0	0	0	0	0	0	0	0	0	0	0.08932	0.24472	0.41228	0.31475	0.41218
d__Bacteria|p__Firmicutes|c__Clostridia|o__Clostridiales|f__Clostridiaceae|g__Clostridium|s__Clostridium_sp._Clone-1	0	0	0	0	0	0	0	0	0	0	0	0	0	0	0	0	0	0	0	0	0	0	0	0	0	0	0	0	0	0	0	0	0	0	0	0	0	0	0	0	0	0	0	0	0.07407	0	0	0	0
d__Bacteria|p__Firmicutes|c__Clostridia|o__Clostridiales|f__Clostridiaceae|g__Clostridium|s__Clostridium_sp._Clone-17	0	0	0	0	0	0	0	0	0	0	0	0	0	0	0	0	0	0	0	0	0	0	0	0	0	0	0	0	0	0	0	0	0	0	0	0	0	0	0	0	0	0	0	0	0.01525	0	0	0	0
d__Bacteria|p__Firmicutes|c__Clostridia|o__Clostridiales|f__Clostridiaceae|g__Clostridium|s__Clostridium_sp._Culture-1	0	0.03548	0	0	0	0	0	0	0	0	0.0077	0	0	0	0	0	0	0	0	0	0	0	0	0.01591	0	0	0	0	0	0	0	0	0	0	0	0	0	0	0	0	0	0	0	0	0.09586	0	0	0	0
d__Bacteria|p__Firmicutes|c__Clostridia|o__Clostridiales|f__Clostridiaceae|g__Clostridium|s__Clostridium_sp._Marseille-P7770	0	0	0	0	0	0	0	0	0	0	0	0	0	0	0	0	0	0	0	0	0	0	0	0	0	0	0	0	0	0	0	0	0	0	0	0	0	0	0	0	0	0	0	0	0	0	0	0	0
d__Bacteria|p__Firmicutes|c__Clostridia|o__Clostridiales|f__Clostridiaceae|g__Clostridium|s__uncultured_Clostridium_sp.	0	0	0.07948	0	0	0	0	0	0.08142	0.06607	0.10779	0.0558	0.18469	0.13346	0.12597	0.03594	0	0.00439	0	0	0	0	0.72596	0	0.31817	0	0.04031	0.63936	0.46165	3.86642	0.29526	0	0.09736	0.00403	0.00705	0	0	0	0	0	0	0.014	0	0	0.01525	0	0	0.01657	0
d__Bacteria|p__Firmicutes|c__Clostridia|o__Clostridiales|f__Clostridiaceae|g__Mordavella	0	0	0	0	0	0	0	0	0	0	0	0	0	0	0	0	0	0	0	0	0	0	0	0.0053	0	0	0	0	0	0	0	0	0	0	0	0	0	0	0	0	0	0	0	0	0	0	0	0	0
d__Bacteria|p__Firmicutes|c__Clostridia|o__Clostridiales|f__Clostridiaceae|g__Mordavella|s__Mordavella_sp._Marseille-P3756	0	0	0	0	0	0	0	0	0	0	0	0	0	0	0	0	0	0	0	0	0	0	0	0.0053	0	0	0	0	0	0	0	0	0	0	0	0	0	0	0	0	0	0	0	0	0	0	0	0	0
d__Bacteria|p__Firmicutes|c__Clostridia|o__Clostridiales|f__Clostridiaceae|g__Proteiniclasticum	0	0	0	0	0	0	0	0.00605	0	0	0	0	0	0	0	0	0	0	0	0	0	0	0	0	0	0	0	0	0	0	0	0	0	0	0	0	0	0	0	0	0	0	0	0	0	0	0	0	0
d__Bacteria|p__Firmicutes|c__Clostridia|o__Clostridiales|f__Clostridiaceae|g__Proteiniclasticum|s__Proteiniclasticum_unclassified	0	0	0	0	0	0	0	0.00605	0	0	0	0	0	0	0	0	0	0	0	0	0	0	0	0	0	0	0	0	0	0	0	0	0	0	0	0	0	0	0	0	0	0	0	0	0	0	0	0	0
d__Bacteria|p__Firmicutes|c__Clostridia|o__Clostridiales|f__Clostridiaceae|g__Sarcina	0	0	0	0	0	0	0	0	0	0	0	0	0	0	0	0	0	0	0	0	0	0	0	0	0	0	0	0	0	0	0	0	0	0	0	0	0	0	0	0	0.00557	0	0	0	0	0	0	0	0
d__Bacteria|p__Firmicutes|c__Clostridia|o__Clostridiales|f__Clostridiaceae|g__Sarcina|s__uncultured_Sarcina_sp.	0	0	0	0	0	0	0	0	0	0	0	0	0	0	0	0	0	0	0	0	0	0	0	0	0	0	0	0	0	0	0	0	0	0	0	0	0	0	0	0	0.00557	0	0	0	0	0	0	0	0
d__Bacteria|p__Firmicutes|c__Clostridia|o__Clostridiales|f__Clostridiales_Family_XIII._Incertae_Sedis	0	0	0	0	0	0	0	0	0	0	0	0	0	0	0	0	0.01204	0	0	0	0	0	0	0	0	0	0	0	0	0	0	0	0	0	0	0	0	0	0	0	0	0	0	0	0	0	0	0	0
d__Bacteria|p__Firmicutes|c__Clostridia|o__Clostridiales|f__Clostridiales_Family_XIII._Incertae_Sedis|g__Anaerovorax	0	0	0	0	0	0	0	0	0	0	0	0	0	0	0	0	0.01204	0	0	0	0	0	0	0	0	0	0	0	0	0	0	0	0	0	0	0	0	0	0	0	0	0	0	0	0	0	0	0	0
d__Bacteria|p__Firmicutes|c__Clostridia|o__Clostridiales|f__Clostridiales_Family_XIII._Incertae_Sedis|g__Anaerovorax|s__uncultured_Anaerovorax_sp.	0	0	0	0	0	0	0	0	0	0	0	0	0	0	0	0	0.01204	0	0	0	0	0	0	0	0	0	0	0	0	0	0	0	0	0	0	0	0	0	0	0	0	0	0	0	0	0	0	0	0
d__Bacteria|p__Firmicutes|c__Clostridia|o__Clostridiales|f__Clostridiales_Family_XIV._Incertae_Sedis	0	0	0	0	0	0	0	0	0.00679	0	0	0	0.01421	0.0239	0	0	0	0	0	0	0	0	0	0	0	0	0	0	0	0	0	0.24665	0	0	0	0	0	0	0	0	0	0	0	0	0.02397	0	0	0	0
d__Bacteria|p__Firmicutes|c__Clostridia|o__Clostridiales|f__Clostridiales_Family_XIV._Incertae_Sedis|g__Clostridiales_Family_XIV._Incertae_Sedis_unclassified	0	0	0	0	0	0	0	0	0.00679	0	0	0	0.01421	0.0239	0	0	0	0	0	0	0	0	0	0	0	0	0	0	0	0	0	0.24665	0	0	0	0	0	0	0	0	0	0	0	0	0.02397	0	0	0	0
d__Bacteria|p__Firmicutes|c__Clostridia|o__Clostridiales|f__Clostridiales_Family_XIV._Incertae_Sedis|g__Clostridiales_Family_XIV._Incertae_Sedis_unclassified|s__Clostridiales_Family_XIV._Incertae_Sedis_unclassified	0	0	0	0	0	0	0	0	0.00679	0	0	0	0.01421	0.0239	0	0	0	0	0	0	0	0	0	0	0	0	0	0	0	0	0	0.24665	0	0	0	0	0	0	0	0	0	0	0	0	0.02397	0	0	0	0
d__Bacteria|p__Firmicutes|c__Clostridia|o__Clostridiales|f__Clostridiales_unclassified	0.01636	0	0.05393	0	0	0.00918	0	0	0.02205	0	0.00962	0	0.12786	0	0.00478	0	0.01686	0.06583	0.0189	0.01816	0.5856	0.11765	0.03156	0	0	0.08054	0.00288	0.06394	0	0.00581	0.47708	0	0	0.00672	0.00846	0	0	0	0.01815	0	0	0.014	0	0	0.97168	0	0.00499	0	0.00834
d__Bacteria|p__Firmicutes|c__Clostridia|o__Clostridiales|f__Clostridiales_unclassified|g__Clostridiales_unclassified	0.01636	0	0.05393	0	0	0.00918	0	0	0.02205	0	0.00962	0	0.12786	0	0.00478	0	0.01686	0.06583	0.0189	0.01816	0.5856	0.11765	0.03156	0	0	0.08054	0.00288	0.06394	0	0.00581	0.47708	0	0	0.00672	0.00846	0	0	0	0.01815	0	0	0.014	0	0	0.97168	0	0.00499	0	0.00834
d__Bacteria|p__Firmicutes|c__Clostridia|o__Clostridiales|f__Clostridiales_unclassified|g__Clostridiales_unclassified|s__Clostridiales_unclassified	0.01636	0	0.05393	0	0	0.00918	0	0	0.02205	0	0.00962	0	0.12786	0	0.00478	0	0.01686	0.06583	0.0189	0.01816	0.5856	0.11765	0.03156	0	0	0.08054	0.00288	0.06394	0	0.00581	0.47708	0	0	0.00672	0.00846	0	0	0	0.01815	0	0	0.014	0	0	0.97168	0	0.00499	0	0.00834
d__Bacteria|p__Firmicutes|c__Clostridia|o__Clostridiales|f__Defluviitaleaceae	0	0	0	0	0	0	0	0	0	0	0	0	0	0.01793	0	0	0	0	0	0	0	0	0	0	0	0	0	0	0.03216	0	0	0	0	0	0	0	0	0	0	0	0	0	0	0	0	0	0	0	0
d__Bacteria|p__Firmicutes|c__Clostridia|o__Clostridiales|f__Defluviitaleaceae|g__Defluviitaleaceae_unclassified	0	0	0	0	0	0	0	0	0	0	0	0	0	0.01793	0	0	0	0	0	0	0	0	0	0	0	0	0	0	0.03216	0	0	0	0	0	0	0	0	0	0	0	0	0	0	0	0	0	0	0	0
d__Bacteria|p__Firmicutes|c__Clostridia|o__Clostridiales|f__Defluviitaleaceae|g__Defluviitaleaceae_unclassified|s__Defluviitaleaceae_unclassified	0	0	0	0	0	0	0	0	0	0	0	0	0	0.01793	0	0	0	0	0	0	0	0	0	0	0	0	0	0	0.03216	0	0	0	0	0	0	0	0	0	0	0	0	0	0	0	0	0	0	0	0
d__Bacteria|p__Firmicutes|c__Clostridia|o__Clostridiales|f__Eubacteriaceae	0	0	0.17882	0.65813	0.0124	0.01071	0	0	0	0	0	0	0	0.00398	0	0	0	0	0.10481	0.11392	0.03544	0.03361	0	0	0.00889	0	0	0	0	0	0.00311	0.02523	0	0	0	0	0.44926	0.88461	0	0	0	0	0	0	0	0.00623	0.02161	0	0.03337
d__Bacteria|p__Firmicutes|c__Clostridia|o__Clostridiales|f__Eubacteriaceae|g__Eubacterium	0	0	0.17882	0.65813	0.0124	0.01071	0	0	0	0	0	0	0	0	0	0	0	0	0.10481	0.11392	0.03544	0.03361	0	0	0	0	0	0	0	0	0.00311	0.02523	0	0	0	0	0.44926	0.88461	0	0	0	0	0	0	0	0.00623	0.02161	0	0.03337
d__Bacteria|p__Firmicutes|c__Clostridia|o__Clostridiales|f__Eubacteriaceae|g__Eubacterium|s__Eubacterium_ramulus	0	0	0.17882	0.65813	0.0124	0.01071	0	0	0	0	0	0	0	0	0	0	0	0	0.10481	0.08255	0.03544	0.03361	0	0	0	0	0	0	0	0	0	0.02523	0	0	0	0	0.44926	0.88461	0	0	0	0	0	0	0	0.00623	0.02161	0	0.03337
d__Bacteria|p__Firmicutes|c__Clostridia|o__Clostridiales|f__Eubacteriaceae|g__Eubacterium|s__uncultured_Eubacterium_sp.	0	0	0	0	0	0	0	0	0	0	0	0	0	0	0	0	0	0	0	0.03137	0	0	0	0	0	0	0	0	0	0	0.00311	0	0	0	0	0	0	0	0	0	0	0	0	0	0	0	0	0	0
d__Bacteria|p__Firmicutes|c__Clostridia|o__Clostridiales|f__Eubacteriaceae|g__Intestinibacillus	0	0	0	0	0	0	0	0	0	0	0	0	0	0.00398	0	0	0	0	0	0	0	0	0	0	0.00889	0	0	0	0	0	0	0	0	0	0	0	0	0	0	0	0	0	0	0	0	0	0	0	0
d__Bacteria|p__Firmicutes|c__Clostridia|o__Clostridiales|f__Eubacteriaceae|g__Intestinibacillus|s__Intestinibacillus_sp._Marseille-P6563	0	0	0	0	0	0	0	0	0	0	0	0	0	0.00398	0	0	0	0	0	0	0	0	0	0	0.00889	0	0	0	0	0	0	0	0	0	0	0	0	0	0	0	0	0	0	0	0	0	0	0	0
d__Bacteria|p__Firmicutes|c__Clostridia|o__Clostridiales|f__Gracilibacteraceae	0	0	0	0	0	0	0	0	0	0	0	0	0	0	0	0	0	0	0	0	0	0	0	0	0	0	0	0	0	0	0	0	0	0	0	0	0	0	0	0	0	0	0	0	0	0	0	0	0
d__Bacteria|p__Firmicutes|c__Clostridia|o__Clostridiales|f__Gracilibacteraceae|g__Gracilibacter	0	0	0	0	0	0	0	0	0	0	0	0	0	0	0	0	0	0	0	0	0	0	0	0	0	0	0	0	0	0	0	0	0	0	0	0	0	0	0	0	0	0	0	0	0	0	0	0	0
d__Bacteria|p__Firmicutes|c__Clostridia|o__Clostridiales|f__Gracilibacteraceae|g__Gracilibacter|s__uncultured_Gracilibacter_sp.	0	0	0	0	0	0	0	0	0	0	0	0	0	0	0	0	0	0	0	0	0	0	0	0	0	0	0	0	0	0	0	0	0	0	0	0	0	0	0	0	0	0	0	0	0	0	0	0	0
d__Bacteria|p__Firmicutes|c__Clostridia|o__Clostridiales|f__Hungateiclostridiaceae	0	0	0	0	0	0	0	0	0	0	0	0	0	0	0	0	0	0	0	0	0	0	0	0	0	0	0	0	0	0	0	0	0	0	0	0	0	0	0	0	0	0	0	0	0	0	0	0	0
d__Bacteria|p__Firmicutes|c__Clostridia|o__Clostridiales|f__Hungateiclostridiaceae|g__Thermoclostridium	0	0	0	0	0	0	0	0	0	0	0	0	0	0	0	0	0	0	0	0	0	0	0	0	0	0	0	0	0	0	0	0	0	0	0	0	0	0	0	0	0	0	0	0	0	0	0	0	0
d__Bacteria|p__Firmicutes|c__Clostridia|o__Clostridiales|f__Hungateiclostridiaceae|g__Thermoclostridium|s__Thermoclostridium_stercorarium	0	0	0	0	0	0	0	0	0	0	0	0	0	0	0	0	0	0	0	0	0	0	0	0	0	0	0	0	0	0	0	0	0	0	0	0	0	0	0	0	0	0	0	0	0	0	0	0	0
d__Bacteria|p__Firmicutes|c__Clostridia|o__Clostridiales|f__Lachnospiraceae	0.05726	0.1987	0.48253	0.37914	0.29591	0.23725	0.01142	0.00302	0.69041	0.86998	2.57353	3.97553	2.39284	2.16318	0.60436	1.44144	4.99362	4.74425	0.57217	1.08472	0.2447	0.27563	0.27776	0.62038	1.88233	1.91282	0.12525	0.9697	1.03872	0.7968	1.80421	0.79181	0.81723	0.18823	0.05215	0.12359	1.32011	1.94927	0.05705	0.02761	0	0.36406	0.33123	0.27774	2.42484	5.51781	5.01713	5.20169	4.70246
d__Bacteria|p__Firmicutes|c__Clostridia|o__Clostridiales|f__Lachnospiraceae|g__Acetatifactor	0	0	0	0	0	0	0	0	0	0	0	0	0	0	0	0	0	0	0	0	0	0	0	0	0	0	0	0	0	0	0	0	0	0	0	0	0	0	0	0	0	0	0	0	0.06754	0	0	0	0
d__Bacteria|p__Firmicutes|c__Clostridia|o__Clostridiales|f__Lachnospiraceae|g__Acetatifactor|s__Acetatifactor_sp.	0	0	0	0	0	0	0	0	0	0	0	0	0	0	0	0	0	0	0	0	0	0	0	0	0	0	0	0	0	0	0	0	0	0	0	0	0	0	0	0	0	0	0	0	0.06754	0	0	0	0
d__Bacteria|p__Firmicutes|c__Clostridia|o__Clostridiales|f__Lachnospiraceae|g__Anaerostipes	0	0	0	0	0	0.00918	0	0	0	0	0	0	0	0	0	0	0	0	0	0	0	0	0	0	0	0	0	0	0	0	0	0	0	0	0	0	0	0	0	0	0	0	0	0	0	0	0	0	0
d__Bacteria|p__Firmicutes|c__Clostridia|o__Clostridiales|f__Lachnospiraceae|g__Anaerostipes|s__Anaerostipes_sp.	0	0	0	0	0	0.00918	0	0	0	0	0	0	0	0	0	0	0	0	0	0	0	0	0	0	0	0	0	0	0	0	0	0	0	0	0	0	0	0	0	0	0	0	0	0	0	0	0	0	0
d__Bacteria|p__Firmicutes|c__Clostridia|o__Clostridiales|f__Lachnospiraceae|g__Anaerotignum	0	0	0	0	0	0	0	0	0	0	0	0	0	0	0	0	0	0	0	0	0	0	0	0	0	0	0	0	0	0	0	0	0	0	0	0	0	0	0	0	0	0	0	0	0.34205	0	0	0	0
d__Bacteria|p__Firmicutes|c__Clostridia|o__Clostridiales|f__Lachnospiraceae|g__Anaerotignum|s__Anaerotignum_sp.	0	0	0	0	0	0	0	0	0	0	0	0	0	0	0	0	0	0	0	0	0	0	0	0	0	0	0	0	0	0	0	0	0	0	0	0	0	0	0	0	0	0	0	0	0.34205	0	0	0	0
d__Bacteria|p__Firmicutes|c__Clostridia|o__Clostridiales|f__Lachnospiraceae|g__Blautia	0	0	0	0	0	0	0	0	0	0	0.75839	1.30272	0.51956	0.9063	0.02232	0.0227	0	0	0	0	0	0	0	0	0.01777	0	0	0	0	0	0	0	0.09577	0.01613	0.01691	0	0	0	0	0	0	0	0	0	0.2244	0.81988	1.05729	0.48593	0.93782
d__Bacteria|p__Firmicutes|c__Clostridia|o__Clostridiales|f__Lachnospiraceae|g__Blautia|s__Ruminococcus_gnavus	0	0	0	0	0	0	0	0	0	0	0.75839	1.30272	0.51956	0.9063	0.02232	0.0227	0	0	0	0	0	0	0	0	0.01777	0	0	0	0	0	0	0	0.09577	0.01613	0.01691	0	0	0	0	0	0	0	0	0	0.2244	0.81988	1.05729	0.48593	0.93782
d__Bacteria|p__Firmicutes|c__Clostridia|o__Clostridiales|f__Lachnospiraceae|g__Coprococcus	0	0	0	0	0	0	0	0	0	0	0	0	0	0	0	0	0.36856	0.26771	0.01031	0.01651	0	0	0	0	0	0	0	0	0	0	0	0	0	0	0	0	0	0	0	0	0	0	0	0	0	0	0	0	0
d__Bacteria|p__Firmicutes|c__Clostridia|o__Clostridiales|f__Lachnospiraceae|g__Coprococcus|s__Coprococcus_catus	0	0	0	0	0	0	0	0	0	0	0	0	0	0	0	0	0.36856	0.26771	0	0	0	0	0	0	0	0	0	0	0	0	0	0	0	0	0	0	0	0	0	0	0	0	0	0	0	0	0	0	0
d__Bacteria|p__Firmicutes|c__Clostridia|o__Clostridiales|f__Lachnospiraceae|g__Coprococcus|s__uncultured_Coprococcus_sp.	0	0	0	0	0	0	0	0	0	0	0	0	0	0	0	0	0	0	0.01031	0.01651	0	0	0	0	0	0	0	0	0	0	0	0	0	0	0	0	0	0	0	0	0	0	0	0	0	0	0	0	0
d__Bacteria|p__Firmicutes|c__Clostridia|o__Clostridiales|f__Lachnospiraceae|g__Eisenbergiella	0	0	0	0	0	0	0	0	0	0	0	0	0	0	0	0	0	0	0	0	0	0	0	0	0	0	0	0	0	0	0	0	0	0	0	0	0	0	0	0	0	0.014	0	0	0	0	0	0	0
d__Bacteria|p__Firmicutes|c__Clostridia|o__Clostridiales|f__Lachnospiraceae|g__Eisenbergiella|s__Eisenbergiella_sp.	0	0	0	0	0	0	0	0	0	0	0	0	0	0	0	0	0	0	0	0	0	0	0	0	0	0	0	0	0	0	0	0	0	0	0	0	0	0	0	0	0	0.014	0	0	0	0	0	0	0
d__Bacteria|p__Firmicutes|c__Clostridia|o__Clostridiales|f__Lachnospiraceae|g__Extibacter	0	0	0	0	0	0	0	0	0	0	0	0	0	0	0	0	0	0	0	0	0	0	0	0	0	0	0	0	0	0	0	0	0	0	0	0	0	0	0	0	0	0	0	0	0	0	0	0	0
d__Bacteria|p__Firmicutes|c__Clostridia|o__Clostridiales|f__Lachnospiraceae|g__Extibacter|s__Extibacter_muris	0	0	0	0	0	0	0	0	0	0	0	0	0	0	0	0	0	0	0	0	0	0	0	0	0	0	0	0	0	0	0	0	0	0	0	0	0	0	0	0	0	0	0	0	0	0	0	0	0
d__Bacteria|p__Firmicutes|c__Clostridia|o__Clostridiales|f__Lachnospiraceae|g__Faecalimonas	0	0	0	0	0	0	0.00326	0	0	0	0	0	0	0	0	0	0	0	0	0	0	0	0	0	0	0	0	0	0	0	0	0	0	0	0	0	0	0	0	0	0	0	0	0	0	0	0	0	0
d__Bacteria|p__Firmicutes|c__Clostridia|o__Clostridiales|f__Lachnospiraceae|g__Faecalimonas|s__Faecalimonas_umbilicata	0	0	0	0	0	0	0.00326	0	0	0	0	0	0	0	0	0	0	0	0	0	0	0	0	0	0	0	0	0	0	0	0	0	0	0	0	0	0	0	0	0	0	0	0	0	0	0	0	0	0
d__Bacteria|p__Firmicutes|c__Clostridia|o__Clostridiales|f__Lachnospiraceae|g__Glucerabacter	0	0	0	0	0	0	0	0	0	0	0	0	0	0	0	0	0	0	0	0	0	0	0	0	0	0	0	0	0	0	0	0	0	0	0	0	0	0	0.01037	0	0	0	0	0	0.6122	2.5968	1.49284	1.39982	1.53022
d__Bacteria|p__Firmicutes|c__Clostridia|o__Clostridiales|f__Lachnospiraceae|g__Glucerabacter|s__Glucerabacter_canisensis	0	0	0	0	0	0	0	0	0	0	0	0	0	0	0	0	0	0	0	0	0	0	0	0	0	0	0	0	0	0	0	0	0	0	0	0	0	0	0.01037	0	0	0	0	0	0.6122	2.5968	1.49284	1.39982	1.53022
d__Bacteria|p__Firmicutes|c__Clostridia|o__Clostridiales|f__Lachnospiraceae|g__Kineothrix	0	0	0	0	0	0	0	0	0	0	0	0	0	0	0	0	0	0	0	0	0	0	0	0	0	0	0	0	0	0	0	0	0	0	0	0	0	0	0.00519	0	0	0.014	0	0	0.01961	0.00312	0	0	0
d__Bacteria|p__Firmicutes|c__Clostridia|o__Clostridiales|f__Lachnospiraceae|g__Kineothrix|s__Kineothrix_sp.	0	0	0	0	0	0	0	0	0	0	0	0	0	0	0	0	0	0	0	0	0	0	0	0	0	0	0	0	0	0	0	0	0	0	0	0	0	0	0.00519	0	0	0.014	0	0	0.01961	0.00312	0	0	0
d__Bacteria|p__Firmicutes|c__Clostridia|o__Clostridiales|f__Lachnospiraceae|g__Lachnoclostridium	0	0.1987	0.07664	0	0	0	0	0	0.45632	0.58182	0.53511	0.78703	0.52972	0.30875	0.45925	0.64884	2.168	2.51476	0.04639	0.04458	0.0135	0.03361	0	0	1.22112	0	0.03023	0.47775	0.68302	0.48766	1.12355	0.45967	0.46767	0.08874	0	0	1.17524	1.70033	0	0	0	0.29405	0	0	0.01307	0	0.01496	0	0
d__Bacteria|p__Firmicutes|c__Clostridia|o__Clostridiales|f__Lachnospiraceae|g__Lachnoclostridium|s__Clostridium]_aldenense	0	0	0	0	0	0	0	0	0.15437	0.17436	0.08662	0.07312	0.06089	0.03984	0	0	0	0	0	0	0	0.00672	0	0	0.15464	0	0	0	0	0	0	0	0.0399	0	0	0	0	0	0	0	0	0	0	0	0	0	0	0	0
d__Bacteria|p__Firmicutes|c__Clostridia|o__Clostridiales|f__Lachnospiraceae|g__Lachnoclostridium|s__Clostridium]_hylemonae	0	0.07806	0	0	0	0	0	0	0	0	0	0	0	0	0	0	0	0	0	0	0	0	0	0	0	0	0	0	0.01514	0	0.02176	0	0	0	0	0	0	0	0	0	0	0	0	0	0	0	0	0	0
d__Bacteria|p__Firmicutes|c__Clostridia|o__Clostridiales|f__Lachnospiraceae|g__Lachnoclostridium|s__Clostridium]_lavalense	0	0	0	0	0	0	0	0	0	0	0	0	0	0	0	0	0	0	0	0	0	0	0	0	0	0	0	0	0	0	0	0	0	0	0	0	0	0	0	0	0	0	0	0	0	0	0	0	0
d__Bacteria|p__Firmicutes|c__Clostridia|o__Clostridiales|f__Lachnospiraceae|g__Lachnoclostridium|s__Clostridium]_scindens	0	0	0	0	0	0	0	0	0.0475	0	0.18479	0.36369	0.1096	0.09163	0	0	0	0	0	0	0	0	0	0	0	0	0	0	0	0	0	0	0.01437	0.00269	0	0	0	0	0	0	0	0	0	0	0	0	0	0	0
d__Bacteria|p__Firmicutes|c__Clostridia|o__Clostridiales|f__Lachnospiraceae|g__Lachnoclostridium|s__Clostridium]_symbiosum	0	0	0	0	0	0	0	0	0.19508	0.33404	0.01347	0	0.01218	0.00996	0.4449	0.62803	0	0	0.03952	0.02477	0	0.01681	0	0	1.06648	0	0.03023	0.47775	0.66788	0.48766	0	0	0.4134	0.08605	0	0	0	0	0	0	0	0	0	0	0	0	0	0	0
d__Bacteria|p__Firmicutes|c__Clostridia|o__Clostridiales|f__Lachnospiraceae|g__Lachnoclostridium|s__Lachnoclostridium_edouardi	0	0.12064	0.07664	0	0	0	0	0	0.05937	0.07342	0.25023	0.35022	0.34705	0.16732	0.01435	0.02081	2.168	2.51476	0.00687	0.01981	0.0135	0.01008	0	0	0	0	0	0	0	0	1.10179	0.45967	0	0	0	0	1.17524	1.70033	0	0	0	0.29405	0	0	0	0	0.01496	0	0
d__Bacteria|p__Firmicutes|c__Clostridia|o__Clostridiales|f__Lachnospiraceae|g__Lachnoclostridium|s__Lachnoclostridium_sp.	0	0	0	0	0	0	0	0	0	0	0	0	0	0	0	0	0	0	0	0	0	0	0	0	0	0	0	0	0	0	0	0	0	0	0	0	0	0	0	0	0	0	0	0	0.01307	0	0	0	0
d__Bacteria|p__Firmicutes|c__Clostridia|o__Clostridiales|f__Lachnospiraceae|g__Lachnoclostridium|s__uncultured_Lachnoclostridium_sp.	0	0	0	0	0	0	0	0	0	0	0	0	0	0	0	0	0	0	0	0	0	0	0	0	0	0	0	0	0	0	0	0	0	0	0	0	0	0	0	0	0	0	0	0	0	0	0	0	0
d__Bacteria|p__Firmicutes|c__Clostridia|o__Clostridiales|f__Lachnospiraceae|g__Lachnospira	0	0	0	0	0	0	0	0	0	0	0	0	0	0	0	0	0	0	0	0	0	0	0	0	0	0	0	0.00355	0	0	0	0	0	0	0	0	0	0	0	0	0	0	0	0	0.02614	0	0	0	0
d__Bacteria|p__Firmicutes|c__Clostridia|o__Clostridiales|f__Lachnospiraceae|g__Lachnospiraceae_unclassified	0.05726	0	0.40589	0.37914	0.29059	0.22807	0.00816	0.00302	0.23409	0.28816	1.24923	1.88578	1.34356	0.94813	0.12279	0.7699	2.45706	1.94422	0.51547	1.02363	0.2312	0.24202	0.27776	0.62038	0.64344	1.91282	0.09502	0.4884	0.3557	0.30914	0.59674	0.33214	0.25379	0.08336	0.03524	0.12359	0.14487	0.24894	0.04149	0.02761	0	0.04201	0.33123	0.27774	1.05447	2.09801	2.45204	3.31594	2.23442
d__Bacteria|p__Firmicutes|c__Clostridia|o__Clostridiales|f__Lachnospiraceae|g__Lachnospiraceae_unclassified|s__Lachnospiraceae_unclassified	0.05726	0	0.40589	0.37914	0.29059	0.22807	0.00816	0.00302	0.23409	0.28816	1.24923	1.88578	1.34356	0.94813	0.12279	0.7699	2.45706	1.94422	0.51547	1.02363	0.2312	0.24202	0.27776	0.62038	0.64344	1.91282	0.09502	0.4884	0.3557	0.30914	0.59674	0.33214	0.25379	0.08336	0.03524	0.12359	0.14487	0.24894	0.04149	0.02761	0	0.04201	0.33123	0.27774	1.05447	2.09801	2.45204	3.31594	2.23442
d__Bacteria|p__Firmicutes|c__Clostridia|o__Clostridiales|f__Lachnospiraceae|g__Lachnospira|s__uncultured_Lachnospira_sp.	0	0	0	0	0	0	0	0	0	0	0	0	0	0	0	0	0	0	0	0	0	0	0	0	0	0	0	0.00355	0	0	0	0	0	0	0	0	0	0	0	0	0	0	0	0	0.02614	0	0	0	0
d__Bacteria|p__Firmicutes|c__Clostridia|o__Clostridiales|f__Lachnospiraceae|g__Mediterraneibacter	0	0	0	0	0.00532	0	0	0	0	0	0	0	0	0	0	0	0	0.01756	0	0	0	0	0	0	0	0	0	0	0	0	0.08392	0	0	0	0	0	0	0	0	0	0	0	0	0	0	0	0	0	0
d__Bacteria|p__Firmicutes|c__Clostridia|o__Clostridiales|f__Lachnospiraceae|g__Mediterraneibacter|s__Mediterraneibacter_sp._KCTC_15684	0	0	0	0	0.00532	0	0	0	0	0	0	0	0	0	0	0	0	0.01756	0	0	0	0	0	0	0	0	0	0	0	0	0.08392	0	0	0	0	0	0	0	0	0	0	0	0	0	0	0	0	0	0
d__Bacteria|p__Firmicutes|c__Clostridia|o__Clostridiales|f__Lachnospiraceae|g__Roseburia	0	0	0	0	0	0	0	0	0	0	0.0308	0	0	0	0	0	0	0	0	0	0	0	0	0	0	0	0	0	0	0	0	0	0	0	0	0	0	0	0	0	0	0	0	0	0.02614	0	0	0	0
d__Bacteria|p__Firmicutes|c__Clostridia|o__Clostridiales|f__Lachnospiraceae|g__Roseburia|s__Roseburia_sp.	0	0	0	0	0	0	0	0	0	0	0	0	0	0	0	0	0	0	0	0	0	0	0	0	0	0	0	0	0	0	0	0	0	0	0	0	0	0	0	0	0	0	0	0	0.02614	0	0	0	0
d__Bacteria|p__Firmicutes|c__Clostridia|o__Clostridiales|f__Lachnospiraceae|g__Roseburia|s__uncultured_Roseburia_sp.	0	0	0	0	0	0	0	0	0	0	0.0308	0	0	0	0	0	0	0	0	0	0	0	0	0	0	0	0	0	0	0	0	0	0	0	0	0	0	0	0	0	0	0	0	0	0	0	0	0	0
d__Bacteria|p__Firmicutes|c__Clostridia|o__Clostridiales|f__Lachnospiraceae|g__Tyzzerella	0	0	0	0	0	0	0	0	0	0	0	0	0	0	0	0	0	0	0	0	0	0	0	0	0	0	0	0	0	0	0	0	0	0	0	0	0	0	0	0	0	0	0	0	0.03922	0	0	0	0
d__Bacteria|p__Firmicutes|c__Clostridia|o__Clostridiales|f__Lachnospiraceae|g__Tyzzerella|s__Tyzzerella_sp.	0	0	0	0	0	0	0	0	0	0	0	0	0	0	0	0	0	0	0	0	0	0	0	0	0	0	0	0	0	0	0	0	0	0	0	0	0	0	0	0	0	0	0	0	0.03922	0	0	0	0
d__Bacteria|p__Firmicutes|c__Clostridia|o__Clostridiales|f__Oscillospiraceae	0	0	0	0	0	0	0	0	0	0	0	0	0	0	0	0	0	0	0	0	0	0	0	0	0	0	0	0	0	0	0	0	0	0	0	0	0	0	0	0	0	0	0	0	0.02832	0	0	0	0
d__Bacteria|p__Firmicutes|c__Clostridia|o__Clostridiales|f__Oscillospiraceae|g__Oscillibacter	0	0	0	0	0	0	0	0	0	0	0	0	0	0	0	0	0	0	0	0	0	0	0	0	0	0	0	0	0	0	0	0	0	0	0	0	0	0	0	0	0	0	0	0	0.02832	0	0	0	0
d__Bacteria|p__Firmicutes|c__Clostridia|o__Clostridiales|f__Oscillospiraceae|g__Oscillibacter|s__Oscillibacter_sp.	0	0	0	0	0	0	0	0	0	0	0	0	0	0	0	0	0	0	0	0	0	0	0	0	0	0	0	0	0	0	0	0	0	0	0	0	0	0	0	0	0	0	0	0	0.02832	0	0	0	0
d__Bacteria|p__Firmicutes|c__Clostridia|o__Clostridiales|f__Peptostreptococcaceae	0	0	0	0	0	0	0	0	0	0	0	0	0	0	0	0	0	0	0	0	0	0	0	0	0	0	0.01728	0	0	0	0	0	0	0	0	0	0	0	0	0	0	0	0	0	0	0	0	0	0
d__Bacteria|p__Firmicutes|c__Clostridia|o__Clostridiales|f__Peptostreptococcaceae|g__Peptostreptococcaceae_unclassified	0	0	0	0	0	0	0	0	0	0	0	0	0	0	0	0	0	0	0	0	0	0	0	0	0	0	0.01728	0	0	0	0	0	0	0	0	0	0	0	0	0	0	0	0	0	0	0	0	0	0
d__Bacteria|p__Firmicutes|c__Clostridia|o__Clostridiales|f__Peptostreptococcaceae|g__Peptostreptococcaceae_unclassified|s__Peptostreptococcaceae_unclassified	0	0	0	0	0	0	0	0	0	0	0	0	0	0	0	0	0	0	0	0	0	0	0	0	0	0	0.01728	0	0	0	0	0	0	0	0	0	0	0	0	0	0	0	0	0	0	0	0	0	0
d__Bacteria|p__Firmicutes|c__Clostridia|o__Clostridiales|f__Ruminococcaceae	1.03067	0	0	0.40775	0	0	0	0	0.24428	0.19455	0.01155	0.02309	0.02435	0.11752	0	0	0.01927	0.00878	0.00515	0.02476	0.02194	0	0	0	0	0	0	0	0	0	0.03419	0.25647	0.04948	0.01076	0.01128	0	0	0.01722	0	0	0	0	0	0	0.12201	0	0.00332	0.07179	0
d__Bacteria|p__Firmicutes|c__Clostridia|o__Clostridiales|f__Ruminococcaceae|g__Anaerotruncus	0	0	0	0	0	0	0	0	0	0	0	0	0	0	0	0	0	0	0	0	0	0	0	0	0	0	0	0	0	0	0	0.10371	0	0	0	0	0	0	0	0	0	0	0	0	0	0	0	0	0
d__Bacteria|p__Firmicutes|c__Clostridia|o__Clostridiales|f__Ruminococcaceae|g__Anaerotruncus|s__uncultured_Anaerotruncus_sp.	0	0	0	0	0	0	0	0	0	0	0	0	0	0	0	0	0	0	0	0	0	0	0	0	0	0	0	0	0	0	0	0.10371	0	0	0	0	0	0	0	0	0	0	0	0	0	0	0	0	0
d__Bacteria|p__Firmicutes|c__Clostridia|o__Clostridiales|f__Ruminococcaceae|g__Bittarella	0	0	0	0	0	0	0	0	0.00679	0	0	0	0	0	0	0	0.01927	0	0	0.0066	0	0	0	0	0	0	0	0	0	0	0	0	0	0	0	0	0	0	0	0	0	0	0	0	0	0	0	0	0
d__Bacteria|p__Firmicutes|c__Clostridia|o__Clostridiales|f__Ruminococcaceae|g__Bittarella|s__Bittarella_massiliensis	0	0	0	0	0	0	0	0	0.00679	0	0	0	0	0	0	0	0.01927	0	0	0.0066	0	0	0	0	0	0	0	0	0	0	0	0	0	0	0	0	0	0	0	0	0	0	0	0	0	0	0	0	0
d__Bacteria|p__Firmicutes|c__Clostridia|o__Clostridiales|f__Ruminococcaceae|g__Candidatus_Soleaferrea	0	0	0	0	0	0	0	0	0	0	0	0	0	0	0	0	0	0	0	0	0	0	0	0	0	0	0	0	0	0	0	0	0	0	0	0	0	0	0	0	0	0	0	0	0	0	0	0	0
d__Bacteria|p__Firmicutes|c__Clostridia|o__Clostridiales|f__Ruminococcaceae|g__Candidatus_Soleaferrea|s__Candidatus_Soleaferrea_massiliensis	0	0	0	0	0	0	0	0	0	0	0	0	0	0	0	0	0	0	0	0	0	0	0	0	0	0	0	0	0	0	0	0	0	0	0	0	0	0	0	0	0	0	0	0	0	0	0	0	0
d__Bacteria|p__Firmicutes|c__Clostridia|o__Clostridiales|f__Ruminococcaceae|g__Harryflintia	0	0	0	0	0	0	0	0	0	0	0	0	0	0	0	0	0	0	0	0	0	0	0	0	0	0	0	0	0	0	0	0	0	0	0	0	0	0	0	0	0	0	0	0	0	0	0	0	0
d__Bacteria|p__Firmicutes|c__Clostridia|o__Clostridiales|f__Ruminococcaceae|g__Harryflintia|s__Harryflintia_acetispora	0	0	0	0	0	0	0	0	0	0	0	0	0	0	0	0	0	0	0	0	0	0	0	0	0	0	0	0	0	0	0	0	0	0	0	0	0	0	0	0	0	0	0	0	0	0	0	0	0
d__Bacteria|p__Firmicutes|c__Clostridia|o__Clostridiales|f__Ruminococcaceae|g__Hydrogenoanaerobacterium	0	0	0	0	0	0	0	0	0	0	0	0	0	0	0	0	0	0	0	0	0	0	0	0	0	0	0	0	0	0	0	0.03924	0	0	0	0	0	0	0	0	0	0	0	0	0	0	0	0	0
d__Bacteria|p__Firmicutes|c__Clostridia|o__Clostridiales|f__Ruminococcaceae|g__Hydrogenoanaerobacterium|s__Hydrogenoanaerobacterium_sp._YN3	0	0	0	0	0	0	0	0	0	0	0	0	0	0	0	0	0	0	0	0	0	0	0	0	0	0	0	0	0	0	0	0.03924	0	0	0	0	0	0	0	0	0	0	0	0	0	0	0	0	0
d__Bacteria|p__Firmicutes|c__Clostridia|o__Clostridiales|f__Ruminococcaceae|g__Neobitarella	0	0	0	0	0	0	0	0	0	0	0	0	0	0	0	0	0	0	0.00515	0.01816	0.01688	0	0	0	0	0	0	0	0	0	0	0	0	0	0	0	0	0	0	0	0	0	0	0	0	0	0.00332	0	0
d__Bacteria|p__Firmicutes|c__Clostridia|o__Clostridiales|f__Ruminococcaceae|g__Neobitarella|s__Neobitarella_massiliensis	0	0	0	0	0	0	0	0	0	0	0	0	0	0	0	0	0	0	0.00515	0.01816	0.01688	0	0	0	0	0	0	0	0	0	0	0	0	0	0	0	0	0	0	0	0	0	0	0	0	0	0.00332	0	0
d__Bacteria|p__Firmicutes|c__Clostridia|o__Clostridiales|f__Ruminococcaceae|g__Pseudoflavonifractor	0	0	0	0	0	0	0	0	0	0	0	0	0	0	0	0	0	0	0	0	0.00506	0	0	0	0	0	0	0	0	0	0	0	0	0	0	0	0	0	0	0	0	0	0	0	0	0	0	0	0
d__Bacteria|p__Firmicutes|c__Clostridia|o__Clostridiales|f__Ruminococcaceae|g__Pseudoflavonifractor|s__uncultured_Pseudoflavonifractor_sp.	0	0	0	0	0	0	0	0	0	0	0	0	0	0	0	0	0	0	0	0	0.00506	0	0	0	0	0	0	0	0	0	0	0	0	0	0	0	0	0	0	0	0	0	0	0	0	0	0	0	0
d__Bacteria|p__Firmicutes|c__Clostridia|o__Clostridiales|f__Ruminococcaceae|g__Ruminococcaceae_unclassified	0	0	0	0	0	0	0	0	0.10687	0.04405	0.01155	0.02309	0.02435	0.11752	0	0	0	0.00878	0	0	0	0	0	0	0	0	0	0	0	0	0	0.11352	0.03192	0	0	0	0	0	0	0	0	0	0	0	0.01089	0	0	0.07179	0
d__Bacteria|p__Firmicutes|c__Clostridia|o__Clostridiales|f__Ruminococcaceae|g__Ruminococcaceae_unclassified|s__Ruminococcaceae_unclassified	0	0	0	0	0	0	0	0	0.10687	0.04405	0.01155	0.02309	0.02435	0.11752	0	0	0	0.00878	0	0	0	0	0	0	0	0	0	0	0	0	0	0.11352	0.03192	0	0	0	0	0	0	0	0	0	0	0	0.01089	0	0	0.07179	0
d__Bacteria|p__Firmicutes|c__Clostridia|o__Clostridiales|f__Ruminococcaceae|g__Ruminococcus	1.03067	0	0	0.40775	0	0	0	0	0.13062	0.1505	0	0	0	0	0	0	0	0	0	0	0	0	0	0	0	0	0	0	0	0	0.03419	0	0.01756	0.01076	0.01128	0	0	0.01722	0	0	0	0	0	0	0.11112	0	0	0	0
d__Bacteria|p__Firmicutes|c__Clostridia|o__Clostridiales|f__Ruminococcaceae|g__Ruminococcus|s__Ruminococcus_sp.	0	0	0	0	0	0	0	0	0	0	0	0	0	0	0	0	0	0	0	0	0	0	0	0	0	0	0	0	0	0	0	0	0	0	0	0	0	0	0	0	0	0	0	0	0.0719	0	0	0	0
d__Bacteria|p__Firmicutes|c__Clostridia|o__Clostridiales|f__Ruminococcaceae|g__Ruminococcus|s__Ruminococcus_sp._653	0	0	0	0.40775	0	0	0	0	0	0	0	0	0	0	0	0	0	0	0	0	0	0	0	0	0	0	0	0	0	0	0	0	0	0	0	0	0	0	0	0	0	0	0	0	0	0	0	0	0
d__Bacteria|p__Firmicutes|c__Clostridia|o__Clostridiales|f__Ruminococcaceae|g__Ruminococcus|s__uncultured_Ruminococcus_sp.	1.03067	0	0	0	0	0	0	0	0.13062	0.1505	0	0	0	0	0	0	0	0	0	0	0	0	0	0	0	0	0	0	0	0	0.03419	0	0.01756	0.01076	0.01128	0	0	0.01722	0	0	0	0	0	0	0.03922	0	0	0	0
d__Bacteria|p__Firmicutes|c__Clostridia|o__Clostridiales|f__Symbiobacteriaceae	0	0	0	0	0	0	0	0	0	0	0	0	0	0	0.00797	0	0	0	0	0	0	0	0	0	0	0	0	0	0	0	0	0	0	0	0	0	0	0	0	0	0	0	0	0	0	0	0	0	0
d__Bacteria|p__Firmicutes|c__Clostridia|o__Clostridiales|f__Symbiobacteriaceae|g__Symbiobacterium	0	0	0	0	0	0	0	0	0	0	0	0	0	0	0.00797	0	0	0	0	0	0	0	0	0	0	0	0	0	0	0	0	0	0	0	0	0	0	0	0	0	0	0	0	0	0	0	0	0	0
d__Bacteria|p__Firmicutes|c__Clostridia|o__Clostridiales|f__Symbiobacteriaceae|g__Symbiobacterium|s__uncultured_Symbiobacterium_sp.	0	0	0	0	0	0	0	0	0	0	0	0	0	0	0.00797	0	0	0	0	0	0	0	0	0	0	0	0	0	0	0	0	0	0	0	0	0	0	0	0	0	0	0	0	0	0	0	0	0	0
d__Bacteria|p__Firmicutes|c__Clostridia|o__Eubacteriales	0	0	0	0	0	0	0	0	0.00509	0.0312	0.00577	0	0	0	0	0.04351	0	0	0	0	0	0	0	0	0	0	0	0	0.0246	0.05951	0.09479	0.07287	0	0	0	0	0	0	0	0	0	0	0	0	0	0	0	0	0
d__Bacteria|p__Firmicutes|c__Clostridia|o__Eubacteriales|f__Anaerofustaceae	0	0	0	0	0	0	0	0	0	0	0.00577	0	0	0	0	0.04351	0	0	0	0	0	0	0	0	0	0	0	0	0	0	0	0	0	0	0	0	0	0	0	0	0	0	0	0	0	0	0	0	0
d__Bacteria|p__Firmicutes|c__Clostridia|o__Eubacteriales|f__Anaerofustaceae|g__Anaerofustis	0	0	0	0	0	0	0	0	0	0	0.00577	0	0	0	0	0.04351	0	0	0	0	0	0	0	0	0	0	0	0	0	0	0	0	0	0	0	0	0	0	0	0	0	0	0	0	0	0	0	0	0
d__Bacteria|p__Firmicutes|c__Clostridia|o__Eubacteriales|f__Anaerofustaceae|g__Anaerofustis|s__Anaerofustis_unclassified	0	0	0	0	0	0	0	0	0	0	0.00577	0	0	0	0	0.04351	0	0	0	0	0	0	0	0	0	0	0	0	0	0	0	0	0	0	0	0	0	0	0	0	0	0	0	0	0	0	0	0	0
d__Bacteria|p__Firmicutes|c__Clostridia|o__Eubacteriales|f__Eubacteriaceae	0	0	0	0	0	0	0	0	0.00509	0.0312	0	0	0	0	0	0	0	0	0	0	0	0	0	0	0	0	0	0	0.0246	0.05951	0.09479	0.07287	0	0	0	0	0	0	0	0	0	0	0	0	0	0	0	0	0
d__Bacteria|p__Firmicutes|c__Clostridia|o__Eubacteriales|f__Eubacteriaceae|g__Eubacterium	0	0	0	0	0	0	0	0	0.00509	0.0312	0	0	0	0	0	0	0	0	0	0	0	0	0	0	0	0	0	0	0.0246	0.05951	0.09479	0.07287	0	0	0	0	0	0	0	0	0	0	0	0	0	0	0	0	0
d__Bacteria|p__Firmicutes|c__Clostridia|o__Eubacteriales|f__Eubacteriaceae|g__Eubacterium|s__Eubacterium_unclassified	0	0	0	0	0	0	0	0	0.00509	0.0312	0	0	0	0	0	0	0	0	0	0	0	0	0	0	0	0	0	0	0.0246	0.05951	0.09479	0.07287	0	0	0	0	0	0	0	0	0	0	0	0	0	0	0	0	0
d__Bacteria|p__Firmicutes|c__Clostridia|o__Lachnospirales	2.83845	1.43343	5.4469	8.92053	3.37727	1.64243	2.44308	2.49214	8.26448	7.11218	12.7541	17.4223	12.6624	12.9352	2.95641	5.49522	13.8294	10.3619	12.5157	10.7151	4.07224	5.48749	3.40886	3.42797	5.83187	1.48997	1.59812	7.94762	5.15382	7.03764	5.56953	9.2396	2.92096	0.78118	0.51306	1.63881	16.403	19.0136	0.36563	0.06105	0.25076	0.26603	0.306	0.28847	7.71022	5.51158	4.4835	5.29279	4.52559
d__Bacteria|p__Firmicutes|c__Clostridia|o__Lachnospirales|f__Defluviitaleaceae	0	0	0	0	0	0	0	0	0	0	0.0077	0	0	0	0	0	0	0	0	0	0	0	0	0	0	0	0.01008	0	0	0	0	0	0	0	0	0	0	0	0	0	0	0	0	0	0	0	0	0	0
d__Bacteria|p__Firmicutes|c__Clostridia|o__Lachnospirales|f__Defluviitaleaceae|g__Defluviitalea	0	0	0	0	0	0	0	0	0	0	0	0	0	0	0	0	0	0	0	0	0	0	0	0	0	0	0	0	0	0	0	0	0	0	0	0	0	0	0	0	0	0	0	0	0	0	0	0	0
d__Bacteria|p__Firmicutes|c__Clostridia|o__Lachnospirales|f__Defluviitaleaceae|g__Defluviitaleaceae_UCG-011	0	0	0	0	0	0	0	0	0	0	0.0077	0	0	0	0	0	0	0	0	0	0	0	0	0	0	0	0.01008	0	0	0	0	0	0	0	0	0	0	0	0	0	0	0	0	0	0	0	0	0	0
d__Bacteria|p__Firmicutes|c__Clostridia|o__Lachnospirales|f__Defluviitaleaceae|g__Defluviitaleaceae_UCG-011|s__Defluviitaleaceae_UCG-011_unclassified	0	0	0	0	0	0	0	0	0	0	0.0077	0	0	0	0	0	0	0	0	0	0	0	0	0	0	0	0.01008	0	0	0	0	0	0	0	0	0	0	0	0	0	0	0	0	0	0	0	0	0	0
d__Bacteria|p__Firmicutes|c__Clostridia|o__Lachnospirales|f__Defluviitaleaceae|g__Defluviitalea|s__Defluviitalea_unclassified	0	0	0	0	0	0	0	0	0	0	0	0	0	0	0	0	0	0	0	0	0	0	0	0	0	0	0	0	0	0	0	0	0	0	0	0	0	0	0	0	0	0	0	0	0	0	0	0	0
d__Bacteria|p__Firmicutes|c__Clostridia|o__Lachnospirales|f__Lachnospiraceae	2.83845	1.43343	5.4469	8.92053	3.37727	1.64243	2.44308	2.49214	8.26448	7.11218	12.7464	17.4223	12.6624	12.9352	2.95641	5.49522	13.8294	10.3619	12.5157	10.7151	4.07224	5.48749	3.40886	3.42797	5.83187	1.48997	1.58804	7.94762	5.15382	7.03764	5.56953	9.2396	2.92096	0.78118	0.51306	1.63881	16.403	19.0136	0.36563	0.06105	0.25076	0.26603	0.306	0.28847	7.71022	5.51158	4.4835	5.29279	4.52559
d__Bacteria|p__Firmicutes|c__Clostridia|o__Lachnospirales|f__Lachnospiraceae|g__A2	0	0	0	0	0	0	0	0	0	0	0	0	0	0	0	0	0	0	0	0	0	0	0	0	0	0	0	0	0	0	0	0	0	0	0	0	0	0	0	0	0	0	0	0	0.03704	0	0	0	0
d__Bacteria|p__Firmicutes|c__Clostridia|o__Lachnospirales|f__Lachnospiraceae|g__A2|s__A2_unclassified	0	0	0	0	0	0	0	0	0	0	0	0	0	0	0	0	0	0	0	0	0	0	0	0	0	0	0	0	0	0	0	0	0	0	0	0	0	0	0	0	0	0	0	0	0.03704	0	0	0	0
d__Bacteria|p__Firmicutes|c__Clostridia|o__Lachnospirales|f__Lachnospiraceae|g__ASF356	0	0	0	0	0	0	0	0	0	0	0	0	0	0	0	0	0	0	0	0	0	0	0	0	0	0	0	0	0	0	0	0	0	0	0	0	0	0	0	0	0	0	0	0	0.05664	0	0	0	0
d__Bacteria|p__Firmicutes|c__Clostridia|o__Lachnospirales|f__Lachnospiraceae|g__ASF356|s__ASF356_unclassified	0	0	0	0	0	0	0	0	0	0	0	0	0	0	0	0	0	0	0	0	0	0	0	0	0	0	0	0	0	0	0	0	0	0	0	0	0	0	0	0	0	0	0	0	0.05664	0	0	0	0
d__Bacteria|p__Firmicutes|c__Clostridia|o__Lachnospirales|f__Lachnospiraceae|g__Acetatifactor	0	0	0	0	0	0	0	0	0	0	0	0	0	0	0	0	0	0	0	0	0	0	0	0	0	0	0	0	0	0	0	0	0	0	0	0	0	0	0	0	0	0	0	0	0.02832	0	0	0	0
d__Bacteria|p__Firmicutes|c__Clostridia|o__Lachnospirales|f__Lachnospiraceae|g__Acetatifactor|s__Acetatifactor_unclassified	0	0	0	0	0	0	0	0	0	0	0	0	0	0	0	0	0	0	0	0	0	0	0	0	0	0	0	0	0	0	0	0	0	0	0	0	0	0	0	0	0	0	0	0	0.02832	0	0	0	0
d__Bacteria|p__Firmicutes|c__Clostridia|o__Lachnospirales|f__Lachnospiraceae|g__Agathobacter	0	0.02838	0	0	0	0	0	0	0	0.09728	2.22898	3.08651	2.5552	1.27878	0	0.06053	0	0	0	0.05944	0.01181	0.00672	0	0.22535	0.00889	0	0	0	0	0	0.76301	0.23264	0.52673	0.06857	0	0	0.2051	1.013	0	0	0	0	0.01513	0	0	0	0	0.22916	0
d__Bacteria|p__Firmicutes|c__Clostridia|o__Lachnospirales|f__Lachnospiraceae|g__Agathobacter|s__Agathobacter_unclassified	0	0.02838	0	0	0	0	0	0	0	0.09728	2.22898	3.08651	2.5552	1.27878	0	0.06053	0	0	0	0.05944	0.01181	0.00672	0	0.22535	0.00889	0	0	0	0	0	0.76301	0.23264	0.52673	0.06857	0	0	0.2051	1.013	0	0	0	0	0.01513	0	0	0	0	0.22916	0
d__Bacteria|p__Firmicutes|c__Clostridia|o__Lachnospirales|f__Lachnospiraceae|g__Anaerostignum	0	0	0	0	0	0	0	0	0.01187	0	0	0	0	0	0	0	0	0	0	0	0	0	0	0	0	0	0	0	0	0	0	0	0	0	0	0	0	0	0	0	0	0	0	0	0	0	0	0	0
d__Bacteria|p__Firmicutes|c__Clostridia|o__Lachnospirales|f__Lachnospiraceae|g__Anaerostignum|s__Anaerostignum_unclassified	0	0	0	0	0	0	0	0	0.01187	0	0	0	0	0	0	0	0	0	0	0	0	0	0	0	0	0	0	0	0	0	0	0	0	0	0	0	0	0	0	0	0	0	0	0	0	0	0	0	0
d__Bacteria|p__Firmicutes|c__Clostridia|o__Lachnospirales|f__Lachnospiraceae|g__Anaerostipes	0	0	0	0	0	0	0	0	0.29516	0.10829	0.10202	0.02886	0.0548	0.0478	0.00478	0.20051	0.66726	0.5859	0.02749	0.01981	0.00844	0.01681	0	0	0	0	0.00288	0	0	0	0.02331	0.25506	0.06385	0.03765	0	0.02966	0.04558	0.20354	0	0	0	0	0	0	0	0.01091	0.03491	0	0.04005
d__Bacteria|p__Firmicutes|c__Clostridia|o__Lachnospirales|f__Lachnospiraceae|g__Anaerostipes|s__Anaerostipes_unclassified	0	0	0	0	0	0	0	0	0.29516	0.10829	0.10202	0.02886	0.0548	0.0478	0.00478	0.20051	0.66726	0.5859	0.02749	0.01981	0.00844	0.01681	0	0	0	0	0.00288	0	0	0	0.02331	0.25506	0.06385	0.03765	0	0.02966	0.04558	0.20354	0	0	0	0	0	0	0	0.01091	0.03491	0	0.04005
d__Bacteria|p__Firmicutes|c__Clostridia|o__Lachnospirales|f__Lachnospiraceae|g__Blautia	0.6953	0	1.47881	5.32942	0.64143	0.71483	0.0359	0.03174	0.29346	0.44784	1.2858	1.64139	0.9275	1.4461	0.19454	0.54479	6.17638	4.23734	0.78867	0.48705	0.36453	0.4437	0.04419	0.68666	0.2133	0.27182	0.01728	0.22555	0.04162	0.00871	0.73815	1.84427	0.22665	0.17076	0.00846	0.89727	0.516	0.56834	0.13743	0.00291	0.19225	0.08401	0.01849	0	0.14815	0.20887	0.70818	0.54667	0.67416
d__Bacteria|p__Firmicutes|c__Clostridia|o__Lachnospirales|f__Lachnospiraceae|g__Blautia|s__Blautia_unclassified	0.6953	0	1.47881	5.32942	0.64143	0.71483	0.0359	0.03174	0.29346	0.44784	1.2858	1.64139	0.9275	1.4461	0.19454	0.54479	6.17638	4.23734	0.78867	0.48705	0.36453	0.4437	0.04419	0.68666	0.2133	0.27182	0.01728	0.22555	0.04162	0.00871	0.73815	1.84427	0.22665	0.17076	0.00846	0.89727	0.516	0.56834	0.13743	0.00291	0.19225	0.08401	0.01849	0	0.14815	0.20887	0.70818	0.54667	0.67416
d__Bacteria|p__Firmicutes|c__Clostridia|o__Lachnospirales|f__Lachnospiraceae|g__Butyrivibrio	0	0	0	0	0	0	0	0.00453	0	0	0	0	0	0	0	0	0	0	0	0	0	0	0	0	0	0	0	0	0	0	0	0	0	0	0	0	0	0	0	0	0	0	0	0	0	0	0	0	0
d__Bacteria|p__Firmicutes|c__Clostridia|o__Lachnospirales|f__Lachnospiraceae|g__Butyrivibrio|s__Butyrivibrio_unclassified	0	0	0	0	0	0	0	0.00453	0	0	0	0	0	0	0	0	0	0	0	0	0	0	0	0	0	0	0	0	0	0	0	0	0	0	0	0	0	0	0	0	0	0	0	0	0	0	0	0	0
d__Bacteria|p__Firmicutes|c__Clostridia|o__Lachnospirales|f__Lachnospiraceae|g__CAG-56	0	0.31933	0	0.2933	0.00886	0.01378	0	0	0.04241	0.06424	0	0	0	0	0.03189	0	0	0	0.10309	0.05779	0.04388	0.02353	0	0	0	0	0	0	0	0	0.02176	0	0	0	0	0	0.28811	0.09081	0	0.01889	0	0	0	0	0	0	0.01662	0.02485	0.01669
d__Bacteria|p__Firmicutes|c__Clostridia|o__Lachnospirales|f__Lachnospiraceae|g__CAG-56|s__CAG-56_unclassified	0	0.31933	0	0.2933	0.00886	0.01378	0	0	0.04241	0.06424	0	0	0	0	0.03189	0	0	0	0.10309	0.05779	0.04388	0.02353	0	0	0	0	0	0	0	0	0.02176	0	0	0	0	0	0.28811	0.09081	0	0.01889	0	0	0	0	0	0	0.01662	0.02485	0.01669
d__Bacteria|p__Firmicutes|c__Clostridia|o__Lachnospirales|f__Lachnospiraceae|g__Catonella	0	0	0	0	0	0	0.00979	0.02418	0.01018	0.00918	0	0	0	0	0.01914	0	0	0	0	0	0	0	0.58077	0.02121	0	0.26175	0.01296	0	0	0	0	0	0.00798	0.00672	0	0	0	0	0.20226	0	0	0	0.11265	0	0	0.00468	0	0	0
d__Bacteria|p__Firmicutes|c__Clostridia|o__Lachnospirales|f__Lachnospiraceae|g__Catonella|s__Catonella_unclassified	0	0	0	0	0	0	0.00979	0.02418	0.01018	0.00918	0	0	0	0	0.01914	0	0	0	0	0	0	0	0.58077	0.02121	0	0.26175	0.01296	0	0	0	0	0	0.00798	0.00672	0	0	0	0	0.20226	0	0	0	0.11265	0	0	0.00468	0	0	0
d__Bacteria|p__Firmicutes|c__Clostridia|o__Lachnospirales|f__Lachnospiraceae|g__Coprococcus	0.02454	0	1.00196	0.25038	0.06202	0.05204	0	0	0	0	0	0	0	0	0	0.33293	0	0	0.08076	0.09246	0.05738	0.04538	0	0	0.02311	0	0	0	0	0	0.32323	0.62784	0	0	0	0	0.12371	0.18162	0	0	0	0	0	0	0	0.02182	0.0266	0	0.01669
d__Bacteria|p__Firmicutes|c__Clostridia|o__Lachnospirales|f__Lachnospiraceae|g__Coprococcus|s__Coprococcus_unclassified	0.02454	0	1.00196	0.25038	0.06202	0.05204	0	0	0	0	0	0	0	0	0	0.33293	0	0	0.08076	0.09246	0.05738	0.04538	0	0	0.02311	0	0	0	0	0	0.32323	0.62784	0	0	0	0	0.12371	0.18162	0	0	0	0	0	0	0	0.02182	0.0266	0	0.01669
d__Bacteria|p__Firmicutes|c__Clostridia|o__Lachnospirales|f__Lachnospiraceae|g__Dorea	0	0	0.39738	0.15738	1.37678	0.33063	0.09792	0.07103	0.66496	0.34506	0.48314	0.66579	0.43838	0.33663	0.08451	0.14566	0	0	0.28007	0.5663	0.22277	0.22858	0	0.16437	0.01244	0	0	0	0.02081	0	0.70862	0.34195	0.23304	0.09815	0.00705	0.02966	0.83667	0.81885	0	0.00291	0	0	0	0	0.0305	0.36474	0.3624	0.68748	0.34209
d__Bacteria|p__Firmicutes|c__Clostridia|o__Lachnospirales|f__Lachnospiraceae|g__Dorea|s__Dorea_unclassified	0	0	0.39738	0.15738	1.37678	0.33063	0.09792	0.07103	0.66496	0.34506	0.48314	0.66579	0.43838	0.33663	0.08451	0.14566	0	0	0.28007	0.5663	0.22277	0.22858	0	0.16437	0.01244	0	0	0	0.02081	0	0.70862	0.34195	0.23304	0.09815	0.00705	0.02966	0.83667	0.81885	0	0.00291	0	0	0	0	0.0305	0.36474	0.3624	0.68748	0.34209
d__Bacteria|p__Firmicutes|c__Clostridia|o__Lachnospirales|f__Lachnospiraceae|g__Eisenbergiella	0	0	0	0	0	0	0	0	0.0933	0.04772	0	0	0	0	0	0.0681	0	0.00439	0	0	0	0	0	0	0.14042	0	0	0.57188	0	0	0.01709	0	0	0	0.03242	0.23235	0	0	0	0	0	0	0	0	0	0	0	0	0
d__Bacteria|p__Firmicutes|c__Clostridia|o__Lachnospirales|f__Lachnospiraceae|g__Eisenbergiella|s__Eisenbergiella_unclassified	0	0	0	0	0	0	0	0	0.0933	0.04772	0	0	0	0	0	0.0681	0	0.00439	0	0	0	0	0	0	0.14042	0	0	0.57188	0	0	0.01709	0	0	0	0.03242	0.23235	0	0	0	0	0	0	0	0	0	0	0	0	0
d__Bacteria|p__Firmicutes|c__Clostridia|o__Lachnospirales|f__Lachnospiraceae|g__Eubacterium]_eligens_group	0	0	0	0	0	0.00612	0	0	0.63612	0.68644	0	0	0	0	0	0.01702	0.36133	0.55737	0	0	0	0	0	0	0	0	0	0	0.01703	0	0.01865	0	0.00958	0.01479	0	0	0	0	0	0	0	0	0	0	0	0	0.02494	0.03037	0.03504
d__Bacteria|p__Firmicutes|c__Clostridia|o__Lachnospirales|f__Lachnospiraceae|g__Eubacterium]_eligens_group|s__Eubacterium]_eligens_group_unclassified	0	0	0	0	0	0.00612	0	0	0.63612	0.68644	0	0	0	0	0	0.01702	0.36133	0.55737	0	0	0	0	0	0	0	0	0	0	0.01703	0	0.01865	0	0.00958	0.01479	0	0	0	0	0	0	0	0	0	0	0	0	0.02494	0.03037	0.03504
d__Bacteria|p__Firmicutes|c__Clostridia|o__Lachnospirales|f__Lachnospiraceae|g__Eubacterium]_fissicatena_group	0	0	0	0	0	0	0	0	0	0	0	0	0	0.01394	0	0	0	0.00658	0	0	0	0	0	0	0	0	0.01296	0	0.00946	0	0	0	0	0	0	0	0	0	0	0	0	0	0	0	0	0	0	0	0
d__Bacteria|p__Firmicutes|c__Clostridia|o__Lachnospirales|f__Lachnospiraceae|g__Eubacterium]_fissicatena_group|s__Eubacterium]_fissicatena_group_unclassified	0	0	0	0	0	0	0	0	0	0	0	0	0	0.01394	0	0	0	0.00658	0	0	0	0	0	0	0	0	0.01296	0	0.00946	0	0	0	0	0	0	0	0	0	0	0	0	0	0	0	0	0	0	0	0
d__Bacteria|p__Firmicutes|c__Clostridia|o__Lachnospirales|f__Lachnospiraceae|g__Eubacterium]_hallii_group	0	0	0.48537	0	0.02658	0.01225	0	0	0.03562	0.02202	0.03272	0.05388	0.06698	0.10756	0.05741	0	0.28907	0.24358	0.122	0.06439	0.027	0	0	0.03181	0.01066	0.81546	0	0	0	0	0.07148	0.48069	0	0	0	0	0.13999	0.1002	0	0	0	0	0.0269	0	0	0	0.01995	0	0.01669
d__Bacteria|p__Firmicutes|c__Clostridia|o__Lachnospirales|f__Lachnospiraceae|g__Eubacterium]_hallii_group|s__Eubacterium]_hallii_group_unclassified	0	0	0.48537	0	0.02658	0.01225	0	0	0.03562	0.02202	0.03272	0.05388	0.06698	0.10756	0.05741	0	0.28907	0.24358	0.122	0.06439	0.027	0	0	0.03181	0.01066	0.81546	0	0	0	0	0.07148	0.48069	0	0	0	0	0.13999	0.1002	0	0	0	0	0.0269	0	0	0	0.01995	0	0.01669
d__Bacteria|p__Firmicutes|c__Clostridia|o__Lachnospirales|f__Lachnospiraceae|g__Eubacterium]_ruminantium_group	0	0	0	0	0	0	0.0049	0	0.43426	0.16152	0	0	0	0	0.00478	0	0	0	0	0	0	0	0.01894	0	0	0	0	0	0	0	0	0	0	0	0	0	0	0	0	0	0	0.00933	0	0	0	0	0	0	0
d__Bacteria|p__Firmicutes|c__Clostridia|o__Lachnospirales|f__Lachnospiraceae|g__Eubacterium]_ruminantium_group|s__Eubacterium]_ruminantium_group_unclassified	0	0	0	0	0	0	0.0049	0	0.43426	0.16152	0	0	0	0	0.00478	0	0	0	0	0	0	0	0.01894	0	0	0	0	0	0	0	0	0	0	0	0	0	0	0	0	0	0	0.00933	0	0	0	0	0	0	0
d__Bacteria|p__Firmicutes|c__Clostridia|o__Lachnospirales|f__Lachnospiraceae|g__Eubacterium]_ventriosum_group	0	0	0	0	0.00886	0	0	0	0.02205	0.01468	0	0	0	0.02789	0	0	0	0	0.02749	0.00495	0	0.01345	0	0	0	0	0	0	0	0.0029	0	0.08549	0	0	0	0.01977	0	0	0	0	0	0	0	0	0	0	0	0	0
d__Bacteria|p__Firmicutes|c__Clostridia|o__Lachnospirales|f__Lachnospiraceae|g__Eubacterium]_ventriosum_group|s__Eubacterium]_ventriosum_group_unclassified	0	0	0	0	0.00886	0	0	0	0.02205	0.01468	0	0	0	0.02789	0	0	0	0	0.02749	0.00495	0	0.01345	0	0	0	0	0	0	0	0.0029	0	0.08549	0	0	0	0.01977	0	0	0	0	0	0	0	0	0	0	0	0	0
d__Bacteria|p__Firmicutes|c__Clostridia|o__Lachnospirales|f__Lachnospiraceae|g__Eubacterium]_xylanophilum_group	0	0	0	0	0	0	0	0	0	0	0	0	0	0	0	0	0	0	0	0	0	0	0	0	0	0	0	0	0	0	0	0	0	0	0	0	0	0	0	0	0	0	0	0	0.11329	0	0	0	0
d__Bacteria|p__Firmicutes|c__Clostridia|o__Lachnospirales|f__Lachnospiraceae|g__Eubacterium]_xylanophilum_group|s__Eubacterium]_xylanophilum_group_unclassified	0	0	0	0	0	0	0	0	0	0	0	0	0	0	0	0	0	0	0	0	0	0	0	0	0	0	0	0	0	0	0	0	0	0	0	0	0	0	0	0	0	0	0	0	0.11329	0	0	0	0
d__Bacteria|p__Firmicutes|c__Clostridia|o__Lachnospirales|f__Lachnospiraceae|g__Fusicatenibacter	0	0	0.9906	2.51091	0.12581	0.0199	0	0	0.15945	0.18905	0.03465	0	0.01624	0.03785	0	0.00567	0.06986	0.08997	0.02062	0.03797	0	0.01513	0	1.29113	0.00711	0	0	0	0	0.00726	0.25175	0.26907	0.06385	0.03899	0	0	0	0.02035	0	0	0	0	0	0	0.08279	0.20731	0.41394	0.7786	0.40383
d__Bacteria|p__Firmicutes|c__Clostridia|o__Lachnospirales|f__Lachnospiraceae|g__Fusicatenibacter|s__Fusicatenibacter_unclassified	0	0	0.9906	2.51091	0.12581	0.0199	0	0	0.15945	0.18905	0.03465	0	0.01624	0.03785	0	0.00567	0.06986	0.08997	0.02062	0.03797	0	0.01513	0	1.29113	0.00711	0	0	0	0	0.00726	0.25175	0.26907	0.06385	0.03899	0	0	0	0.02035	0	0	0	0	0	0	0.08279	0.20731	0.41394	0.7786	0.40383
d__Bacteria|p__Firmicutes|c__Clostridia|o__Lachnospirales|f__Lachnospiraceae|g__GCA-900066575	0	0	0	0	0	0.00459	0	0	0	0	0	0	0	0	0	0	0.14453	0.18433	0	0	0	0	0.13888	0	0	0	0	0	0	0	0	0	0	0	0	0	0	0.00626	0	0	0	0	0	0	0.03922	0	0	0	0
d__Bacteria|p__Firmicutes|c__Clostridia|o__Lachnospirales|f__Lachnospiraceae|g__GCA-900066575|s__GCA-900066575_unclassified	0	0	0	0	0	0.00459	0	0	0	0	0	0	0	0	0	0	0.14453	0.18433	0	0	0	0	0.13888	0	0	0	0	0	0	0	0	0	0	0	0	0	0	0.00626	0	0	0	0	0	0	0.03922	0	0	0	0
d__Bacteria|p__Firmicutes|c__Clostridia|o__Lachnospirales|f__Lachnospiraceae|g__GCA-900066755	0	0	0	0	0	0	0	0	0	0	0	0	0	0	0	0	0	0	0	0	0	0	0	0	0	0	0	0	0	0	0	0	0	0	0	0	0	0	0	0	0	0	0	0	0	0	0	0	0
d__Bacteria|p__Firmicutes|c__Clostridia|o__Lachnospirales|f__Lachnospiraceae|g__GCA-900066755|s__GCA-900066755_unclassified	0	0	0	0	0	0	0	0	0	0	0	0	0	0	0	0	0	0	0	0	0	0	0	0	0	0	0	0	0	0	0	0	0	0	0	0	0	0	0	0	0	0	0	0	0	0	0	0	0
d__Bacteria|p__Firmicutes|c__Clostridia|o__Lachnospirales|f__Lachnospiraceae|g__Howardella	0	0	0	0	0	0	0	0	0	0	0	0	0	0	0	0	0	0.04169	0	0	0	0	0	0	0	0	0	0	0	0	0	0	0.00479	0	0	0	0	0	0	0	0	0	0	0	0	0	0	0	0
d__Bacteria|p__Firmicutes|c__Clostridia|o__Lachnospirales|f__Lachnospiraceae|g__Howardella|s__Howardella_unclassified	0	0	0	0	0	0	0	0	0	0	0	0	0	0	0	0	0	0.04169	0	0	0	0	0	0	0	0	0	0	0	0	0	0	0.00479	0	0	0	0	0	0	0	0	0	0	0	0	0	0	0	0
d__Bacteria|p__Firmicutes|c__Clostridia|o__Lachnospirales|f__Lachnospiraceae|g__Hungatella	0	0	0	0	0.02126	0.01225	0.01306	0.03174	2.93803	2.75677	0.05582	0.10776	0.0893	0	0.08611	0.19106	0	0	0	0.01156	0	0	0	0.16172	1.30466	0	0.16413	2.12588	1.33765	3.23653	0	0	0.05906	0.00538	0	0.09146	0	0	0	0	0	0	0	0	0	0	0	0	0
d__Bacteria|p__Firmicutes|c__Clostridia|o__Lachnospirales|f__Lachnospiraceae|g__Hungatella|s__Hungatella_unclassified	0	0	0	0	0.02126	0.01225	0.01306	0.03174	2.93803	2.75677	0.05582	0.10776	0.0893	0	0.08611	0.19106	0	0	0	0.01156	0	0	0	0.16172	1.30466	0	0.16413	2.12588	1.33765	3.23653	0	0	0.05906	0.00538	0	0.09146	0	0	0	0	0	0	0	0	0	0	0	0	0
d__Bacteria|p__Firmicutes|c__Clostridia|o__Lachnospirales|f__Lachnospiraceae|g__Johnsonella	0	0	0	0	0	0	0	0.00453	0	0	0	0	0	0	0	0	0	0	0	0	0	0	0	0	0	0	0.01296	0	0	0	0	0	0	0	0	0	0	0	0	0	0	0	0	0	0	0.01247	0	0	0
d__Bacteria|p__Firmicutes|c__Clostridia|o__Lachnospirales|f__Lachnospiraceae|g__Johnsonella|s__Johnsonella_unclassified	0	0	0	0	0	0	0	0.00453	0	0	0	0	0	0	0	0	0	0	0	0	0	0	0	0	0	0	0.01296	0	0	0	0	0	0	0	0	0	0	0	0	0	0	0	0	0	0	0.01247	0	0	0
d__Bacteria|p__Firmicutes|c__Clostridia|o__Lachnospirales|f__Lachnospiraceae|g__Lachnoanaerobaculum	0.40082	0	0	0	0	0	0.08323	0.08463	0	0	0	0.01732	0	0.03585	0.2679	0.3405	0.03854	0.03292	0	0	0	0.01849	0.40401	0.29958	0.016	0	0.12382	0	0	0	0.14918	0	0.00479	0	0.05638	0.0173	0	0	0	0	0	0	0.02018	0.11941	0	0.03117	0	0	0.02837
d__Bacteria|p__Firmicutes|c__Clostridia|o__Lachnospirales|f__Lachnospiraceae|g__Lachnoanaerobaculum|s__Lachnoanaerobaculum_unclassified	0.40082	0	0	0	0	0	0.08323	0.08463	0	0	0	0.01732	0	0.03585	0.2679	0.3405	0.03854	0.03292	0	0	0	0.01849	0.40401	0.29958	0.016	0	0.12382	0	0	0	0.14918	0	0.00479	0	0.05638	0.0173	0	0	0	0	0	0	0.02018	0.11941	0	0.03117	0	0	0.02837
d__Bacteria|p__Firmicutes|c__Clostridia|o__Lachnospirales|f__Lachnospiraceae|g__Lachnoclostridium	0	0	0.00568	0	0.05316	0.06276	0	0	0.84307	1.00947	0.84886	0.99677	1.1061	1.19114	0.14989	0.12296	0.39506	0.49374	0.42097	0.78588	0.1772	0.23866	0	0.09279	0.62744	0	0.15981	0.19003	2.225	3.01882	0.10412	0.22283	0.38627	0.09815	0.01691	0	0.44763	0.48693	0	0	0	0	0	0	0.01307	0.01247	0.09808	0	0.06007
d__Bacteria|p__Firmicutes|c__Clostridia|o__Lachnospirales|f__Lachnospiraceae|g__Lachnoclostridium|s__Lachnoclostridium_unclassified	0	0	0.00568	0	0.05316	0.06276	0	0	0.84307	1.00947	0.84886	0.99677	1.1061	1.19114	0.14989	0.12296	0.39506	0.49374	0.42097	0.78588	0.1772	0.23866	0	0.09279	0.62744	0	0.15981	0.19003	2.225	3.01882	0.10412	0.22283	0.38627	0.09815	0.01691	0	0.44763	0.48693	0	0	0	0	0	0	0.01307	0.01247	0.09808	0	0.06007
d__Bacteria|p__Firmicutes|c__Clostridia|o__Lachnospirales|f__Lachnospiraceae|g__Lachnospira	0	0	0.1476	0	0.00709	0.02755	0	0.00605	0.05259	0.12114	0.85656	1.31812	0.94171	0.77285	0.2073	0.18916	0	0	0	0	0	0	0.101	0	0.26662	0	0.05471	0.99634	0	0.01596	0.13209	0.23264	0	0.00807	0	0	0.03256	0.08768	0	0	0	0	0	0	0	0.00312	0.06151	0.12148	0.07509
d__Bacteria|p__Firmicutes|c__Clostridia|o__Lachnospirales|f__Lachnospiraceae|g__Lachnospiraceae_AC2044_group	0	0	0	0	0	0	0	0	0	0	0	0	0	0	0	0	0	0	0	0	0	0	0	0	0	0	0	0	0	0	0	0	0	0	0	0	0	0	0	0	0	0	0	0	0	0	0	0	0
d__Bacteria|p__Firmicutes|c__Clostridia|o__Lachnospirales|f__Lachnospiraceae|g__Lachnospiraceae_AC2044_group|s__Lachnospiraceae_AC2044_group_unclassified	0	0	0	0	0	0	0	0	0	0	0	0	0	0	0	0	0	0	0	0	0	0	0	0	0	0	0	0	0	0	0	0	0	0	0	0	0	0	0	0	0	0	0	0	0	0	0	0	0
d__Bacteria|p__Firmicutes|c__Clostridia|o__Lachnospirales|f__Lachnospiraceae|g__Lachnospiraceae_FCS020_group	0	0	0	0	0	0	0	0	0	0	0	0	0	0	0	0	0	0.01097	0	0	0	0	0	0	0	0	0	0	0	0	0	0.03924	0	0	0	0	0	0	0	0	0	0	0	0	0.05882	0	0	0	0
d__Bacteria|p__Firmicutes|c__Clostridia|o__Lachnospirales|f__Lachnospiraceae|g__Lachnospiraceae_FCS020_group|s__Lachnospiraceae_FCS020_group_unclassified	0	0	0	0	0	0	0	0	0	0	0	0	0	0	0	0	0	0.01097	0	0	0	0	0	0	0	0	0	0	0	0	0	0.03924	0	0	0	0	0	0	0	0	0	0	0	0	0.05882	0	0	0	0
d__Bacteria|p__Firmicutes|c__Clostridia|o__Lachnospirales|f__Lachnospiraceae|g__Lachnospiraceae_FE2018_group	0	0	0	0	0	0	0	0	0	0	0	0	0	0	0	0	0	0	0	0	0	0	0	0	0	0	0	0	0	0	0	0	0	0	0	0	0	0	0	0	0	0	0	0	0	0	0	0	0
d__Bacteria|p__Firmicutes|c__Clostridia|o__Lachnospirales|f__Lachnospiraceae|g__Lachnospiraceae_FE2018_group|s__Lachnospiraceae_FE2018_group_unclassified	0	0	0	0	0	0	0	0	0	0	0	0	0	0	0	0	0	0	0	0	0	0	0	0	0	0	0	0	0	0	0	0	0	0	0	0	0	0	0	0	0	0	0	0	0	0	0	0	0
d__Bacteria|p__Firmicutes|c__Clostridia|o__Lachnospirales|f__Lachnospiraceae|g__Lachnospiraceae_ND3007_group	0	0	0.10786	0	0.0124	0	0	0	0	0.01468	0.0462	0	0.04668	0.09163	0.03827	0	0	0	0	0.01651	0	0.0084	0	0.09809	0	0	0	0	0	0	0	0	0	0	0.00705	0	0	0	0	0	0	0	0	0	0	0	0	0.00828	0
d__Bacteria|p__Firmicutes|c__Clostridia|o__Lachnospirales|f__Lachnospiraceae|g__Lachnospiraceae_ND3007_group|s__Lachnospiraceae_ND3007_group_unclassified	0	0	0.10786	0	0.0124	0	0	0	0	0.01468	0.0462	0	0.04668	0.09163	0.03827	0	0	0	0	0.01651	0	0.0084	0	0.09809	0	0	0	0	0	0	0	0	0	0	0.00705	0	0	0	0	0	0	0	0	0	0	0	0	0.00828	0
d__Bacteria|p__Firmicutes|c__Clostridia|o__Lachnospirales|f__Lachnospiraceae|g__Lachnospiraceae_NK3A20_group	0	0	0	0	0	0	0	0	0	0	0	0	0	0	0	0	0	0	0	0	0	0	0	0	0	0	0	0	0	0	0	0	0	0	0	0	0	0	0	0	0	0	0	0	0	0	0	0	0
d__Bacteria|p__Firmicutes|c__Clostridia|o__Lachnospirales|f__Lachnospiraceae|g__Lachnospiraceae_NK3A20_group|s__Lachnospiraceae_NK3A20_group_unclassified	0	0	0	0	0	0	0	0	0	0	0	0	0	0	0	0	0	0	0	0	0	0	0	0	0	0	0	0	0	0	0	0	0	0	0	0	0	0	0	0	0	0	0	0	0	0	0	0	0
d__Bacteria|p__Firmicutes|c__Clostridia|o__Lachnospirales|f__Lachnospiraceae|g__Lachnospiraceae_NK4A136_group	0.08998	0.07096	0.03406	0	0	0.00612	0.00326	0	0	0	0.00385	0.00577	0	0.00996	0.01276	0.01513	0	0	0.00515	0.00826	0	0.00504	0.11363	0.04242	0.016	0.11074	0.00288	0.01598	0	0.02903	0.03263	0.01822	0.03192	0.00403	0	0	0	0.01096	0	0	0	0.07468	0	0	4.69935	0.01247	0	0.02209	0
d__Bacteria|p__Firmicutes|c__Clostridia|o__Lachnospirales|f__Lachnospiraceae|g__Lachnospiraceae_NK4A136_group|s__Lachnospiraceae_NK4A136_group_unclassified	0.08998	0.07096	0.03406	0	0	0.00612	0.00326	0	0	0	0.00385	0.00577	0	0.00996	0.01276	0.01513	0	0	0.00515	0.00826	0	0.00504	0.11363	0.04242	0.016	0.11074	0.00288	0.01598	0	0.02903	0.03263	0.01822	0.03192	0.00403	0	0	0	0.01096	0	0	0	0.07468	0	0	4.69935	0.01247	0	0.02209	0
d__Bacteria|p__Firmicutes|c__Clostridia|o__Lachnospirales|f__Lachnospiraceae|g__Lachnospiraceae_UCG-001	0	0	0	0	0	0	0	0	0.08482	0.07342	0.05197	0.17126	0.06495	0.00996	0	0	0	0	0	0	0	0	0	0	0	0	0	0	0	0	0	0	0	0	0	0	0	0	0	0	0	0	0.02522	0	0.3159	0	0	0	0
d__Bacteria|p__Firmicutes|c__Clostridia|o__Lachnospirales|f__Lachnospiraceae|g__Lachnospiraceae_UCG-001|s__Lachnospiraceae_UCG-001_unclassified	0	0	0	0	0	0	0	0	0.08482	0.07342	0.05197	0.17126	0.06495	0.00996	0	0	0	0	0	0	0	0	0	0	0	0	0	0	0	0	0	0	0	0	0	0	0	0	0	0	0	0	0.02522	0	0.3159	0	0	0	0
d__Bacteria|p__Firmicutes|c__Clostridia|o__Lachnospirales|f__Lachnospiraceae|g__Lachnospiraceae_UCG-003	0	0	0	0	0	0	0	0	0	0.01468	0	0	0	0	0	0	0	0	0	0	0	0	0	0	0	0	0	0	0	0	0	0	0	0	0	0	0	0	0	0	0	0	0	0	0	0	0	0	0
d__Bacteria|p__Firmicutes|c__Clostridia|o__Lachnospirales|f__Lachnospiraceae|g__Lachnospiraceae_UCG-003|s__Lachnospiraceae_UCG-003_unclassified	0	0	0	0	0	0	0	0	0	0.01468	0	0	0	0	0	0	0	0	0	0	0	0	0	0	0	0	0	0	0	0	0	0	0	0	0	0	0	0	0	0	0	0	0	0	0	0	0	0	0
d__Bacteria|p__Firmicutes|c__Clostridia|o__Lachnospirales|f__Lachnospiraceae|g__Lachnospiraceae_UCG-004	0	0	0.05109	0	0.23567	0.08113	0	0	0.07125	0.02753	0.03465	0.01155	0	0.06374	0.33965	0.06621	0.12285	0.28088	0	0.01321	0.03206	0.01176	0	0.00795	0	0	0	0	0	0	0	0	0.31763	0.06319	0	0	0.31904	0.43839	0.00519	0	0	0	0	0	0	0	0	0.01933	0
d__Bacteria|p__Firmicutes|c__Clostridia|o__Lachnospirales|f__Lachnospiraceae|g__Lachnospiraceae_UCG-004|s__Lachnospiraceae_UCG-004_unclassified	0	0	0.05109	0	0.23567	0.08113	0	0	0.07125	0.02753	0.03465	0.01155	0	0.06374	0.33965	0.06621	0.12285	0.28088	0	0.01321	0.03206	0.01176	0	0.00795	0	0	0	0	0	0	0	0	0.31763	0.06319	0	0	0.31904	0.43839	0.00519	0	0	0	0	0	0	0	0	0.01933	0
d__Bacteria|p__Firmicutes|c__Clostridia|o__Lachnospirales|f__Lachnospiraceae|g__Lachnospiraceae_UCG-006	0	0	0	0	0	0	0	0	0	0	0.00385	0	0	0	0	0	0	0	0	0	0	0	0	0	0	0	0	0	0	0	0	0	0	0	0	0	0	0	0	0	0	0	0	0	0.20697	0	0	0	0
d__Bacteria|p__Firmicutes|c__Clostridia|o__Lachnospirales|f__Lachnospiraceae|g__Lachnospiraceae_UCG-006|s__Lachnospiraceae_UCG-006_unclassified	0	0	0	0	0	0	0	0	0	0	0.00385	0	0	0	0	0	0	0	0	0	0	0	0	0	0	0	0	0	0	0	0	0	0	0	0	0	0	0	0	0	0	0	0	0	0.20697	0	0	0	0
d__Bacteria|p__Firmicutes|c__Clostridia|o__Lachnospirales|f__Lachnospiraceae|g__Lachnospiraceae_UCG-010	0	0	0.06812	0	0.14175	0.05204	0	0	0.50042	0.22575	0.0077	0.0077	0.03044	0.0239	0.57566	1.20309	0.38542	0.25674	0.03436	1.4793	0.07932	0.12605	0	0	0	0	0	0	0	0	0	0	0.6209	0.08202	0	0	0.14975	0.14248	0	0	0	0	0	0	0.04575	0.06547	0.0798	0	0.11014
d__Bacteria|p__Firmicutes|c__Clostridia|o__Lachnospirales|f__Lachnospiraceae|g__Lachnospiraceae_UCG-010|s__Lachnospiraceae_UCG-010_unclassified	0	0	0.06812	0	0.14175	0.05204	0	0	0.50042	0.22575	0.0077	0.0077	0.03044	0.0239	0.57566	1.20309	0.38542	0.25674	0.03436	1.4793	0.07932	0.12605	0	0	0	0	0	0	0	0	0	0	0.6209	0.08202	0	0	0.14975	0.14248	0	0	0	0	0	0	0.04575	0.06547	0.0798	0	0.11014
d__Bacteria|p__Firmicutes|c__Clostridia|o__Lachnospirales|f__Lachnospiraceae|g__Lachnospiraceae_unclassified	0	0	0	0	0	0	0	0	0	0	0	0	0	0	0	0	0	0	0	0	0	0	0	0	0	0	0	0	0	0	0	0	0	0	0	0	0	0	0	0	0	0	0	0	0.07625	0	0	0	0
d__Bacteria|p__Firmicutes|c__Clostridia|o__Lachnospirales|f__Lachnospiraceae|g__Lachnospiraceae_unclassified|s__Lachnospiraceae_unclassified	0	0	0	0	0	0	0	0	0	0	0	0	0	0	0	0	0	0	0	0	0	0	0	0	0	0	0	0	0	0	0	0	0	0	0	0	0	0	0	0	0	0	0	0	0.07625	0	0	0	0
d__Bacteria|p__Firmicutes|c__Clostridia|o__Lachnospirales|f__Lachnospiraceae|g__Lachnospira|s__Lachnospira_unclassified	0	0	0.1476	0	0.00709	0.02755	0	0.00605	0.05259	0.12114	0.85656	1.31812	0.94171	0.77285	0.2073	0.18916	0	0	0	0	0	0	0.101	0	0.26662	0	0.05471	0.99634	0	0.01596	0.13209	0.23264	0	0.00807	0	0	0.03256	0.08768	0	0	0	0	0	0	0	0.00312	0.06151	0.12148	0.07509
d__Bacteria|p__Firmicutes|c__Clostridia|o__Lachnospirales|f__Lachnospiraceae|g__Lactonifactor	0	0	0	0	0	0	0	0	0	0	0	0	0	0	0	0	0	0	0	0	0	0	0	0	0	0	0	0	0	0	0	0	0	0	0	0	0	0	0	0	0	0	0	0	0	0	0	0	0
d__Bacteria|p__Firmicutes|c__Clostridia|o__Lachnospirales|f__Lachnospiraceae|g__Lactonifactor|s__Lactonifactor_unclassified	0	0	0	0	0	0	0	0	0	0	0	0	0	0	0	0	0	0	0	0	0	0	0	0	0	0	0	0	0	0	0	0	0	0	0	0	0	0	0	0	0	0	0	0	0	0	0	0	0
d__Bacteria|p__Firmicutes|c__Clostridia|o__Lachnospirales|f__Lachnospiraceae|g__Marvinbryantia	0	0	0	0	0	0	0	0	0	0	0	0	0	0	0	0	0	0	0	0	0	0	0	0	0	0	0	0	0	0	0	0	0	0.00403	0	0	0	0	0	0	0	0	0	0	0	0	0	0	0
d__Bacteria|p__Firmicutes|c__Clostridia|o__Lachnospirales|f__Lachnospiraceae|g__Marvinbryantia|s__Marvinbryantia_unclassified	0	0	0	0	0	0	0	0	0	0	0	0	0	0	0	0	0	0	0	0	0	0	0	0	0	0	0	0	0	0	0	0	0	0.00403	0	0	0	0	0	0	0	0	0	0	0	0	0	0	0
d__Bacteria|p__Firmicutes|c__Clostridia|o__Lachnospirales|f__Lachnospiraceae|g__Moryella	0	0	0	0	0	0	0	0	0	0	0	0	0	0	0	0	0	0	0	0	0	0	0	0	0	0	0	0	0	0	0	0	0	0	0	0	0	0	0	0	0	0	0	0	0	0	0	0	0
d__Bacteria|p__Firmicutes|c__Clostridia|o__Lachnospirales|f__Lachnospiraceae|g__Moryella|s__Moryella_unclassified	0	0	0	0	0	0	0	0	0	0	0	0	0	0	0	0	0	0	0	0	0	0	0	0	0	0	0	0	0	0	0	0	0	0	0	0	0	0	0	0	0	0	0	0	0	0	0	0	0
d__Bacteria|p__Firmicutes|c__Clostridia|o__Lachnospirales|f__Lachnospiraceae|g__Oribacterium	1.27607	0.13483	0.08515	0	0	0.00306	0.14198	0.15113	0	0	0	0.01347	0	0.01394	0.02232	0	0.01204	0	0	0.00826	0	0	0.23988	0.03712	0.06221	0	0.20444	0	0.00757	0	0	0	0	0	0.12685	0.10629	0	0	0.00519	0	0	0	0.08743	0.16101	0.03268	0.12937	0.05652	0	0.01502
d__Bacteria|p__Firmicutes|c__Clostridia|o__Lachnospirales|f__Lachnospiraceae|g__Oribacterium|s__Oribacterium_unclassified	1.27607	0.13483	0.08515	0	0	0.00306	0.14198	0.15113	0	0	0	0.01347	0	0.01394	0.02232	0	0.01204	0	0	0.00826	0	0	0.23988	0.03712	0.06221	0	0.20444	0	0.00757	0	0	0	0	0	0.12685	0.10629	0	0	0.00519	0	0	0	0.08743	0.16101	0.03268	0.12937	0.05652	0	0.01502
d__Bacteria|p__Firmicutes|c__Clostridia|o__Lachnospirales|f__Lachnospiraceae|g__Roseburia	0	0.48964	0.12205	0.35053	0.03189	0.04898	0	0.01058	0.36471	0.23126	1.37435	2.76131	1.36792	1.89029	0.20411	0.20997	1.04546	1.72917	7.53449	3.4407	1.83613	2.01012	0.27145	0	1.03271	0	0.25915	0.53635	0.00757	0	0	0.02943	0.09736	0.02017	0	0.05438	11.3504	12.992	0	0	0	0.03267	0	0.00268	0.27669	0.17613	0.09476	0	0.12182
d__Bacteria|p__Firmicutes|c__Clostridia|o__Lachnospirales|f__Lachnospiraceae|g__Roseburia|s__Roseburia_unclassified	0	0.48964	0.12205	0.35053	0.03189	0.04898	0	0.01058	0.36471	0.23126	1.37435	2.76131	1.36792	1.89029	0.20411	0.20997	1.04546	1.72917	7.53449	3.4407	1.83613	2.01012	0.27145	0	1.03271	0	0.25915	0.53635	0.00757	0	0	0.02943	0.09736	0.02017	0	0.05438	11.3504	12.992	0	0	0	0.03267	0	0.00268	0.27669	0.17613	0.09476	0	0.12182
d__Bacteria|p__Firmicutes|c__Clostridia|o__Lachnospirales|f__Lachnospiraceae|g__Ruminococcus]_gauvreauii_group	0	0	0.17314	0	0	0	0	0	0	0	0	0	0	0	0	0	0	0	0.00859	0.00826	0	0.02017	0	0	0.01955	0	0	0	0	0	0	0	0	0	0	0	0	0.01096	0	0	0	0	0	0	0	0.00779	0.03657	0	0.0534
d__Bacteria|p__Firmicutes|c__Clostridia|o__Lachnospirales|f__Lachnospiraceae|g__Ruminococcus]_gauvreauii_group|s__Ruminococcus]_gauvreauii_group_unclassified	0	0	0.17314	0	0	0	0	0	0	0	0	0	0	0	0	0	0	0	0.00859	0.00826	0	0.02017	0	0	0.01955	0	0	0	0	0	0	0	0	0	0	0	0	0.01096	0	0	0	0	0	0	0	0.00779	0.03657	0	0.0534
d__Bacteria|p__Firmicutes|c__Clostridia|o__Lachnospirales|f__Lachnospiraceae|g__Ruminococcus]_gnavus_group	0.04908	0.09225	0	0	0.02126	0	2.02366	2.0584	0.07294	0	0.9297	1.68373	0.85647	1.17919	0.18976	0.37833	0.23848	0.158	0.36083	0.26746	0.27677	0.2874	0.03156	0.01326	0.54568	0	0.18141	0.58253	1.42846	0.68069	0.06061	0.42323	0.17558	0.02286	0.22129	0.16067	0	0	0.01556	0	0	0.03734	0	0	1.35076	4.09471	2.24258	2.36892	2.30785
d__Bacteria|p__Firmicutes|c__Clostridia|o__Lachnospirales|f__Lachnospiraceae|g__Ruminococcus]_gnavus_group|s__Ruminococcus]_gnavus_group_unclassified	0.04908	0.09225	0	0	0.02126	0	2.02366	2.0584	0.07294	0	0.9297	1.68373	0.85647	1.17919	0.18976	0.37833	0.23848	0.158	0.36083	0.26746	0.27677	0.2874	0.03156	0.01326	0.54568	0	0.18141	0.58253	1.42846	0.68069	0.06061	0.42323	0.17558	0.02286	0.22129	0.16067	0	0	0.01556	0	0	0.03734	0	0	1.35076	4.09471	2.24258	2.36892	2.30785
d__Bacteria|p__Firmicutes|c__Clostridia|o__Lachnospirales|f__Lachnospiraceae|g__Ruminococcus]_torques_group	0	0.28385	0.29803	0.02861	0.60245	0.1944	0	0	0.54282	0.40562	2.90845	3.48869	2.70336	3.54753	0.44649	1.4036	3.57237	1.21569	2.68733	3.27725	0.91132	1.9681	1.46455	0.25451	1.00427	0.0302	0.15693	1.50783	0.05865	0.03774	2.15385	4.137	0.09098	0.03765	0	0	1.94843	1.84124	0	0.03634	0.05851	0.028	0	0	0.01307	0.07326	0.19783	0.45556	0.20859
d__Bacteria|p__Firmicutes|c__Clostridia|o__Lachnospirales|f__Lachnospiraceae|g__Ruminococcus]_torques_group|s__Ruminococcus]_torques_group_unclassified	0	0.28385	0.29803	0.02861	0.60245	0.1944	0	0	0.54282	0.40562	2.90845	3.48869	2.70336	3.54753	0.44649	1.4036	3.57237	1.21569	2.68733	3.27725	0.91132	1.9681	1.46455	0.25451	1.00427	0.0302	0.15693	1.50783	0.05865	0.03774	2.15385	4.137	0.09098	0.03765	0	0	1.94843	1.84124	0	0.03634	0.05851	0.028	0	0	0.01307	0.07326	0.19783	0.45556	0.20859
d__Bacteria|p__Firmicutes|c__Clostridia|o__Lachnospirales|f__Lachnospiraceae|g__Sellimonas	0	0	0	0	0	0	0	0	0	0	0.10779	0.06735	0.03653	0.06175	0	0	0.31075	0.17555	0	0	0	0	0	0	0	0	0	0	0	0	0	0	0	0	0	0	0	0	0	0	0	0	0	0	0	0	0	0	0
d__Bacteria|p__Firmicutes|c__Clostridia|o__Lachnospirales|f__Lachnospiraceae|g__Sellimonas|s__Sellimonas_unclassified	0	0	0	0	0	0	0	0	0	0	0.10779	0.06735	0.03653	0.06175	0	0	0.31075	0.17555	0	0	0	0	0	0	0	0	0	0	0	0	0	0	0	0	0	0	0	0	0	0	0	0	0	0	0	0	0	0	0
d__Bacteria|p__Firmicutes|c__Clostridia|o__Lachnospirales|f__Lachnospiraceae|g__Shuttleworthia	0	0	0	0	0	0	0	0	0	0	0	0	0	0	0	0	0	0.05705	0	0	0	0	0	0	0	0	0.0144	0	0	0	0	0	0	0	0.02678	0	0	0	0	0	0	0	0	0	0	0.02962	0.00499	0	0
d__Bacteria|p__Firmicutes|c__Clostridia|o__Lachnospirales|f__Lachnospiraceae|g__Shuttleworthia|s__Shuttleworthia_unclassified	0	0	0	0	0	0	0	0	0	0	0	0	0	0	0	0	0	0.05705	0	0	0	0	0	0	0	0	0.0144	0	0	0	0	0	0	0	0.02678	0	0	0	0	0	0	0	0	0	0	0.02962	0.00499	0	0
d__Bacteria|p__Firmicutes|c__Clostridia|o__Lachnospirales|f__Lachnospiraceae|g__Stomatobaculum	0.30266	0	0	0	0	0	0.02938	0.0136	0	0	0	0	0	0	0.01595	0	0	0	0	0	0.00844	0	0	0	0	0	0	0	0	0	0	0	0	0	0	0	0	0	0	0	0	0	0	0.00537	0	0.0452	0.00332	0	0
d__Bacteria|p__Firmicutes|c__Clostridia|o__Lachnospirales|f__Lachnospiraceae|g__Stomatobaculum|s__Stomatobaculum_unclassified	0.30266	0	0	0	0	0	0.02938	0.0136	0	0	0	0	0	0	0.01595	0	0	0	0	0	0.00844	0	0	0	0	0	0	0	0	0	0	0	0	0	0	0	0	0	0	0	0	0	0	0.00537	0	0.0452	0.00332	0	0
d__Bacteria|p__Firmicutes|c__Clostridia|o__Lachnospirales|f__Lachnospiraceae|g__Tuzzerella	0	0.01419	0	0	0	0	0	0	0.03223	0	0.97398	0.79857	1.05131	0.60752	0.00319	0	0	0	0.01375	0.00826	0.01519	0	0	0	0.5208	0	0.20732	1.19525	0	0	0	0	0	0	0.00987	0	0	0	0	0	0	0	0	0	0.07407	0	0	0	0
d__Bacteria|p__Firmicutes|c__Clostridia|o__Lachnospirales|f__Lachnospiraceae|g__Tuzzerella|s__Tuzzerella_unclassified	0	0.01419	0	0	0	0	0	0	0.03223	0	0.97398	0.79857	1.05131	0.60752	0.00319	0	0	0	0.01375	0.00826	0.01519	0	0	0	0.5208	0	0.20732	1.19525	0	0	0	0	0	0	0.00987	0	0	0	0	0	0	0	0	0	0.07407	0	0	0	0
d__Bacteria|p__Firmicutes|c__Clostridia|o__Lachnospirales|f__Lachnospiraceae|g__Tyzzerella	0	0	0	0	0	0	0	0	0.06276	0.03854	0.37535	0.49646	0.30849	0.13943	0	0	0	0	0	0	0	0	0	0	0	0	0	0	0	0	0	0	0	0	0	0	0	0	0	0	0	0	0	0	0.01089	0	0	0	0
d__Bacteria|p__Firmicutes|c__Clostridia|o__Lachnospirales|f__Lachnospiraceae|g__Tyzzerella|s__Tyzzerella_unclassified	0	0	0	0	0	0	0	0	0.06276	0.03854	0.37535	0.49646	0.30849	0.13943	0	0	0	0	0	0	0	0	0	0	0	0	0	0	0	0	0	0	0	0	0	0	0	0	0	0	0	0	0	0	0.01089	0	0	0	0
d__Bacteria|p__Firmicutes|c__Clostridia|o__Monoglobales	0	0	0	0	0	0	0	0	0.02714	0	0.0154	0.07697	0.03044	0.07569	0	0	0.01445	0	0	0	0	0	0	0	0	0	0	0	0	0	0.00311	0	0	0	0	0.18291	0	0	0.01297	0	0	0	0	0	0.00871	0	0	0	0
d__Bacteria|p__Firmicutes|c__Clostridia|o__Monoglobales|f__Monoglobaceae	0	0	0	0	0	0	0	0	0.02714	0	0.0154	0.07697	0.03044	0.07569	0	0	0.01445	0	0	0	0	0	0	0	0	0	0	0	0	0	0.00311	0	0	0	0	0.18291	0	0	0.01297	0	0	0	0	0	0.00871	0	0	0	0
d__Bacteria|p__Firmicutes|c__Clostridia|o__Monoglobales|f__Monoglobaceae|g__Monoglobus	0	0	0	0	0	0	0	0	0.02714	0	0.0154	0.07697	0.03044	0.07569	0	0	0.01445	0	0	0	0	0	0	0	0	0	0	0	0	0	0.00311	0	0	0	0	0.18291	0	0	0.01297	0	0	0	0	0	0.00871	0	0	0	0
d__Bacteria|p__Firmicutes|c__Clostridia|o__Monoglobales|f__Monoglobaceae|g__Monoglobus|s__Monoglobus_unclassified	0	0	0	0	0	0	0	0	0.02714	0	0.0154	0.07697	0.03044	0.07569	0	0	0.01445	0	0	0	0	0	0	0	0	0	0	0	0	0	0.00311	0	0	0	0	0.18291	0	0	0.01297	0	0	0	0	0	0.00871	0	0	0	0
d__Bacteria|p__Firmicutes|c__Clostridia|o__Oscillospirales	1.55419	3.05848	9.76413	4.51391	11.5777	8.38664	0.04569	0.02569	2.56654	2.39152	14.1631	14.0029	12.8694	11.1425	1.04286	2.12053	22.063	19.7231	9.76304	14.9202	3.60139	5.62866	0.52395	0.68931	1.34376	0.5537	0.17565	0.42979	0.86086	1.28881	17.6721	20.2085	2.35272	0.65615	0.06343	0.6402	10.0352	16.2752	0.2593	0.05378	0.09752	0.62078	0.05213	0.01073	1.33988	0.1169	0.42226	0.25402	0.45056
d__Bacteria|p__Firmicutes|c__Clostridia|o__Oscillospirales|f__Butyricicoccaceae	0	0	0.07096	0.08584	0.05847	0.0551	0	0	0.07125	0.04589	0.3792	0.82743	0.40794	0.4402	0.09568	0.24591	0.02168	0.01317	0.14261	0.20638	0.02869	0.0958	0	0	0.05332	0.23155	0.05471	0.01243	0.04541	0	0.0575	0.38539	0.19473	0.09143	0	0	0.06023	0.18318	0	0.03343	0.03622	0.12602	0	0	0.23747	0.04053	0.09974	0.04418	0.07176
d__Bacteria|p__Firmicutes|c__Clostridia|o__Oscillospirales|f__Butyricicoccaceae|g__Butyricicoccaceae_unclassified	0	0	0.00568	0	0	0	0	0	0	0	0	0	0	0	0	0	0	0.01317	0	0	0	0	0	0	0	0	0	0	0	0	0	0	0	0	0	0	0	0	0	0	0	0	0	0	0	0	0	0	0
d__Bacteria|p__Firmicutes|c__Clostridia|o__Oscillospirales|f__Butyricicoccaceae|g__Butyricicoccaceae_unclassified|s__Butyricicoccaceae_unclassified	0	0	0.00568	0	0	0	0	0	0	0	0	0	0	0	0	0	0	0.01317	0	0	0	0	0	0	0	0	0	0	0	0	0	0	0	0	0	0	0	0	0	0	0	0	0	0	0	0	0	0	0
d__Bacteria|p__Firmicutes|c__Clostridia|o__Oscillospirales|f__Butyricicoccaceae|g__Butyricicoccus	0	0	0.06528	0.08584	0.05847	0.0551	0	0	0.07125	0.04589	0.3792	0.82743	0.40794	0.4402	0.09568	0.24591	0.02168	0	0.14261	0.20638	0.02869	0.0958	0	0	0.05332	0.23155	0.05471	0.01243	0.04541	0	0.0575	0.38539	0.19473	0.09143	0	0	0.06023	0.18318	0	0.03343	0.03622	0.12602	0	0	0.14379	0.04053	0.09974	0.04418	0.07176
d__Bacteria|p__Firmicutes|c__Clostridia|o__Oscillospirales|f__Butyricicoccaceae|g__Butyricicoccus|s__Butyricicoccus_unclassified	0	0	0.06528	0.08584	0.05847	0.0551	0	0	0.07125	0.04589	0.3792	0.82743	0.40794	0.4402	0.09568	0.24591	0.02168	0	0.14261	0.20638	0.02869	0.0958	0	0	0.05332	0.23155	0.05471	0.01243	0.04541	0	0.0575	0.38539	0.19473	0.09143	0	0	0.06023	0.18318	0	0.03343	0.03622	0.12602	0	0	0.14379	0.04053	0.09974	0.04418	0.07176
d__Bacteria|p__Firmicutes|c__Clostridia|o__Oscillospirales|f__Butyricicoccaceae|g__UCG-009	0	0	0	0	0	0	0	0	0	0	0	0	0	0	0	0	0	0	0	0	0	0	0	0	0	0	0	0	0	0	0	0	0	0	0	0	0	0	0	0	0	0	0	0	0.09368	0	0	0	0
d__Bacteria|p__Firmicutes|c__Clostridia|o__Oscillospirales|f__Butyricicoccaceae|g__UCG-009|s__UCG-009_unclassified	0	0	0	0	0	0	0	0	0	0	0	0	0	0	0	0	0	0	0	0	0	0	0	0	0	0	0	0	0	0	0	0	0	0	0	0	0	0	0	0	0	0	0	0	0.09368	0	0	0	0
d__Bacteria|p__Firmicutes|c__Clostridia|o__Oscillospirales|f__Clostridium]_methylpentosum_group	0	0	0	0	0	0	0	0	0	0	0	0	0	0	0	0	0	0	0	0	0	0	0	0	0	0	0	0	0	0	0	0	0	0	0	0	0	0	0	0	0	0	0	0	0	0	0	0	0
d__Bacteria|p__Firmicutes|c__Clostridia|o__Oscillospirales|f__Clostridium]_methylpentosum_group|g__Clostridium]_methylpentosum_group_unclassified	0	0	0	0	0	0	0	0	0	0	0	0	0	0	0	0	0	0	0	0	0	0	0	0	0	0	0	0	0	0	0	0	0	0	0	0	0	0	0	0	0	0	0	0	0	0	0	0	0
d__Bacteria|p__Firmicutes|c__Clostridia|o__Oscillospirales|f__Clostridium]_methylpentosum_group|g__Clostridium]_methylpentosum_group_unclassified|s__Clostridium]_methylpentosum_group_unclassified	0	0	0	0	0	0	0	0	0	0	0	0	0	0	0	0	0	0	0	0	0	0	0	0	0	0	0	0	0	0	0	0	0	0	0	0	0	0	0	0	0	0	0	0	0	0	0	0	0
d__Bacteria|p__Firmicutes|c__Clostridia|o__Oscillospirales|f__Ethanoligenenaceae	0	0	0	0	0	0	0	0	0	0	0	0	0	0	0.01116	0.00567	0	0	0	0	0	0	0	0	0	0	0	0	0	0	0	0	0	0	0	0	0	0	0	0	0	0	0	0	0	0	0	0	0
d__Bacteria|p__Firmicutes|c__Clostridia|o__Oscillospirales|f__Ethanoligenenaceae|g__Acetanaerobacterium	0	0	0	0	0	0	0	0	0	0	0	0	0	0	0.01116	0.00567	0	0	0	0	0	0	0	0	0	0	0	0	0	0	0	0	0	0	0	0	0	0	0	0	0	0	0	0	0	0	0	0	0
d__Bacteria|p__Firmicutes|c__Clostridia|o__Oscillospirales|f__Ethanoligenenaceae|g__Acetanaerobacterium|s__Acetanaerobacterium_unclassified	0	0	0	0	0	0	0	0	0	0	0	0	0	0	0.01116	0.00567	0	0	0	0	0	0	0	0	0	0	0	0	0	0	0	0	0	0	0	0	0	0	0	0	0	0	0	0	0	0	0	0	0
d__Bacteria|p__Firmicutes|c__Clostridia|o__Oscillospirales|f__Eubacterium]_coprostanoligenes_group	0	0	0	0	0.01772	0.01684	0	0	0.24427	0.02202	2.60048	1.78764	2.69321	1.26882	0.10524	0.13242	0	0	0.01031	0.16345	0	0.0084	0	0	0	0	0	0	0	0	1.73737	3.37323	0	0	0	0.34605	0.02279	0.01722	0	0	0	0	0.00841	0	0	0	0	0	0
d__Bacteria|p__Firmicutes|c__Clostridia|o__Oscillospirales|f__Eubacterium]_coprostanoligenes_group|g__Eubacterium]_coprostanoligenes_group_unclassified	0	0	0	0	0.01772	0.01684	0	0	0.24427	0.02202	2.60048	1.78764	2.69321	1.26882	0.10524	0.13242	0	0	0.01031	0.16345	0	0.0084	0	0	0	0	0	0	0	0	1.73737	3.37323	0	0	0	0.34605	0.02279	0.01722	0	0	0	0	0.00841	0	0	0	0	0	0
d__Bacteria|p__Firmicutes|c__Clostridia|o__Oscillospirales|f__Eubacterium]_coprostanoligenes_group|g__Eubacterium]_coprostanoligenes_group_unclassified|s__Eubacterium]_coprostanoligenes_group_unclassified	0	0	0	0	0.01772	0.01684	0	0	0.24427	0.02202	2.60048	1.78764	2.69321	1.26882	0.10524	0.13242	0	0	0.01031	0.16345	0	0.0084	0	0	0	0	0	0	0	0	1.73737	3.37323	0	0	0	0.34605	0.02279	0.01722	0	0	0	0	0.00841	0	0	0	0	0	0
d__Bacteria|p__Firmicutes|c__Clostridia|o__Oscillospirales|f__Hungateiclostridiaceae	0	0	0	0	0	0	0	0	0	0	0	0	0	0	0	0	0	0	0	0	0	0	0	0	0	0	0	0	0	0	0	0	0	0	0	0.00989	0	0	0	0	0	0	0	0.00268	0	0	0	0.01657	0
d__Bacteria|p__Firmicutes|c__Clostridia|o__Oscillospirales|f__Hungateiclostridiaceae|g__Fastidiosipila	0	0	0	0	0	0	0	0	0	0	0	0	0	0	0	0	0	0	0	0	0	0	0	0	0	0	0	0	0	0	0	0	0	0	0	0	0	0	0	0	0	0	0	0	0	0	0	0	0
d__Bacteria|p__Firmicutes|c__Clostridia|o__Oscillospirales|f__Hungateiclostridiaceae|g__Fastidiosipila|s__Fastidiosipila_unclassified	0	0	0	0	0	0	0	0	0	0	0	0	0	0	0	0	0	0	0	0	0	0	0	0	0	0	0	0	0	0	0	0	0	0	0	0	0	0	0	0	0	0	0	0	0	0	0	0	0
d__Bacteria|p__Firmicutes|c__Clostridia|o__Oscillospirales|f__Hungateiclostridiaceae|g__HN-HF0106	0	0	0	0	0	0	0	0	0	0	0	0	0	0	0	0	0	0	0	0	0	0	0	0	0	0	0	0	0	0	0	0	0	0	0	0	0	0	0	0	0	0	0	0	0	0	0	0.01657	0
d__Bacteria|p__Firmicutes|c__Clostridia|o__Oscillospirales|f__Hungateiclostridiaceae|g__HN-HF0106|s__HN-HF0106_unclassified	0	0	0	0	0	0	0	0	0	0	0	0	0	0	0	0	0	0	0	0	0	0	0	0	0	0	0	0	0	0	0	0	0	0	0	0	0	0	0	0	0	0	0	0	0	0	0	0.01657	0
d__Bacteria|p__Firmicutes|c__Clostridia|o__Oscillospirales|f__Hungateiclostridiaceae|g__Ruminiclostridium	0	0	0	0	0	0	0	0	0	0	0	0	0	0	0	0	0	0	0	0	0	0	0	0	0	0	0	0	0	0	0	0	0	0	0	0.00989	0	0	0	0	0	0	0	0.00268	0	0	0	0	0
d__Bacteria|p__Firmicutes|c__Clostridia|o__Oscillospirales|f__Hungateiclostridiaceae|g__Ruminiclostridium|s__Ruminiclostridium_unclassified	0	0	0	0	0	0	0	0	0	0	0	0	0	0	0	0	0	0	0	0	0	0	0	0	0	0	0	0	0	0	0	0	0	0	0	0.00989	0	0	0	0	0	0	0	0.00268	0	0	0	0	0
d__Bacteria|p__Firmicutes|c__Clostridia|o__Oscillospirales|f__Oscillospiraceae	0	1.53279	1.3454	0.95858	0.07973	0.12245	0.00653	0	0.75486	0.8039	1.87866	1.50478	1.3882	1.40228	0.28224	0.90421	0.69858	0.94358	0.05326	0.84203	0.1637	0.23698	0.03156	0.22005	0.19374	0.07047	0	0	0.65842	1.16544	7.784	11.5099	0.03192	0.01614	0	0.10629	0.22626	0.27557	0	0	0	0	0	0	0.66014	0.00623	0.03824	0.00828	0.04339
d__Bacteria|p__Firmicutes|c__Clostridia|o__Oscillospirales|f__Oscillospiraceae|g__Colidextribacter	0	0.05677	0	0	0	0	0	0	0	0.00918	0.16554	0.10583	0.16033	0.09362	0.00478	0	0	0	0.00344	0.00991	0	0	0.03156	0	0	0.05034	0	0	0	0	0	0.02102	0	0	0	0	0	0.01566	0	0	0	0	0	0	0.28105	0	0	0	0
d__Bacteria|p__Firmicutes|c__Clostridia|o__Oscillospirales|f__Oscillospiraceae|g__Colidextribacter|s__Colidextribacter_unclassified	0	0.05677	0	0	0	0	0	0	0	0.00918	0.16554	0.10583	0.16033	0.09362	0.00478	0	0	0	0.00344	0.00991	0	0	0.03156	0	0	0.05034	0	0	0	0	0	0.02102	0	0	0	0	0	0.01566	0	0	0	0	0	0	0.28105	0	0	0	0
d__Bacteria|p__Firmicutes|c__Clostridia|o__Oscillospirales|f__Oscillospiraceae|g__Flavonifractor	0	1.45473	0	0.75828	0	0.00765	0.00653	0	0.2765	0.2386	0.44079	0.38293	0.30849	0.5398	0.01435	0.00378	0.22403	0.2721	0.00687	0.09246	0.11476	0.18488	0	0	0.19374	0	0	0	0.47489	1.02901	0	0	0.02554	0.01076	0	0	0.1351	0.11743	0	0	0	0	0	0	0.00654	0.00623	0.03325	0.00828	0.04339
d__Bacteria|p__Firmicutes|c__Clostridia|o__Oscillospirales|f__Oscillospiraceae|g__Flavonifractor|s__Flavonifractor_unclassified	0	1.45473	0	0.75828	0	0.00765	0.00653	0	0.2765	0.2386	0.44079	0.38293	0.30849	0.5398	0.01435	0.00378	0.22403	0.2721	0.00687	0.09246	0.11476	0.18488	0	0	0.19374	0	0	0	0.47489	1.02901	0	0	0.02554	0.01076	0	0	0.1351	0.11743	0	0	0	0	0	0	0.00654	0.00623	0.03325	0.00828	0.04339
d__Bacteria|p__Firmicutes|c__Clostridia|o__Oscillospirales|f__Oscillospiraceae|g__Intestinimonas	0	0	0.10786	0	0	0	0	0	0.02714	0.04772	0.0231	0.02502	0.01015	0.04382	0.07973	0.17214	0	0.01536	0.00687	0.00826	0.01856	0	0	0	0	0.02013	0	0	0	0	0	0.11632	0	0	0	0	0	0	0	0	0	0	0	0	0.16776	0	0	0	0
d__Bacteria|p__Firmicutes|c__Clostridia|o__Oscillospirales|f__Oscillospiraceae|g__Intestinimonas|s__Intestinimonas_unclassified	0	0	0.10786	0	0	0	0	0	0.02714	0.04772	0.0231	0.02502	0.01015	0.04382	0.07973	0.17214	0	0.01536	0.00687	0.00826	0.01856	0	0	0	0	0.02013	0	0	0	0	0	0.11632	0	0	0	0	0	0	0	0	0	0	0	0	0.16776	0	0	0	0
d__Bacteria|p__Firmicutes|c__Clostridia|o__Oscillospirales|f__Oscillospiraceae|g__NK4A214_group	0	0.02129	0.01419	0	0.0124	0.00918	0	0	0.12722	0	0.6968	0.56766	0.43838	0.37049	0.07016	0.00757	0.22162	0.36646	0	0.10071	0.00338	0	0	0	0	0	0	0	0	0	0.18337	2.20024	0	0	0	0	0	0	0	0	0	0	0	0	0	0	0	0	0
d__Bacteria|p__Firmicutes|c__Clostridia|o__Oscillospirales|f__Oscillospiraceae|g__NK4A214_group|s__NK4A214_group_unclassified	0	0.02129	0.01419	0	0.0124	0.00918	0	0	0.12722	0	0.6968	0.56766	0.43838	0.37049	0.07016	0.00757	0.22162	0.36646	0	0.10071	0.00338	0	0	0	0	0	0	0	0	0	0.18337	2.20024	0	0	0	0	0	0	0	0	0	0	0	0	0	0	0	0	0
d__Bacteria|p__Firmicutes|c__Clostridia|o__Oscillospirales|f__Oscillospiraceae|g__Oscillibacter	0	0	0	0	0	0.00612	0	0	0.07633	0.11379	0.10009	0.11161	0.07915	0.16732	0.02073	0.17214	0.03132	0.1163	0	0.05118	0	0.01345	0	0	0	0	0	0	0.14947	0.12337	0.26263	0.36998	0	0	0	0	0	0	0	0	0	0	0	0	0.08061	0	0	0	0
d__Bacteria|p__Firmicutes|c__Clostridia|o__Oscillospirales|f__Oscillospiraceae|g__Oscillibacter|s__Oscillibacter_unclassified	0	0	0	0	0	0.00612	0	0	0.07633	0.11379	0.10009	0.11161	0.07915	0.16732	0.02073	0.17214	0.03132	0.1163	0	0.05118	0	0.01345	0	0	0	0	0	0	0.14947	0.12337	0.26263	0.36998	0	0	0	0	0	0	0	0	0	0	0	0	0.08061	0	0	0	0
d__Bacteria|p__Firmicutes|c__Clostridia|o__Oscillospirales|f__Oscillospiraceae|g__Oscillospira	0	0	0	0	0	0	0	0	0	0	0	0	0	0	0	0	0	0	0	0	0	0	0	0	0	0	0	0	0	0	0	0	0	0	0	0	0	0	0	0	0	0	0	0	0	0	0	0	0
d__Bacteria|p__Firmicutes|c__Clostridia|o__Oscillospirales|f__Oscillospiraceae|g__Oscillospiraceae_unclassified	0	0	0	0	0	0	0	0	0	0	0	0	0	0	0.03827	0	0	0	0.00344	0	0	0	0	0	0	0	0	0	0	0	0.0575	0	0	0	0	0	0	0	0	0	0	0	0	0	0.12418	0	0.00499	0	0
d__Bacteria|p__Firmicutes|c__Clostridia|o__Oscillospirales|f__Oscillospiraceae|g__Oscillospiraceae_unclassified|s__Oscillospiraceae_unclassified	0	0	0	0	0	0	0	0	0	0	0	0	0	0	0.03827	0	0	0	0.00344	0	0	0	0	0	0	0	0	0	0	0	0.0575	0	0	0	0	0	0	0	0	0	0	0	0	0	0.12418	0	0.00499	0	0
d__Bacteria|p__Firmicutes|c__Clostridia|o__Oscillospirales|f__Oscillospiraceae|g__Oscillospira|s__Oscillospira_unclassified	0	0	0	0	0	0	0	0	0	0	0	0	0	0	0	0	0	0	0	0	0	0	0	0	0	0	0	0	0	0	0	0	0	0	0	0	0	0	0	0	0	0	0	0	0	0	0	0	0
d__Bacteria|p__Firmicutes|c__Clostridia|o__Oscillospirales|f__Oscillospiraceae|g__Papillibacter	0	0	0	0	0	0	0	0	0	0	0	0	0	0	0	0	0	0	0	0	0	0	0	0	0	0	0	0	0	0	0	0	0	0	0	0	0.00326	0	0	0	0	0	0	0	0	0	0	0	0
d__Bacteria|p__Firmicutes|c__Clostridia|o__Oscillospirales|f__Oscillospiraceae|g__Papillibacter|s__Papillibacter_unclassified	0	0	0	0	0	0	0	0	0	0	0	0	0	0	0	0	0	0	0	0	0	0	0	0	0	0	0	0	0	0	0	0	0	0	0	0	0.00326	0	0	0	0	0	0	0	0	0	0	0	0
d__Bacteria|p__Firmicutes|c__Clostridia|o__Oscillospirales|f__Oscillospiraceae|g__UCG-002	0	0	0.61026	0.11446	0.06733	0.03827	0	0	0.0475	0	0.28103	0.19627	0.2679	0.1215	0.05422	0.37833	0.12767	0.09875	0.02749	0.54979	0.01181	0.02017	0	0	0	0	0	0	0.03406	0	5.53691	5.29178	0.00638	0.00538	0	0.07168	0.00814	0.01096	0	0	0	0	0	0	0	0	0	0	0
d__Bacteria|p__Firmicutes|c__Clostridia|o__Oscillospirales|f__Oscillospiraceae|g__UCG-002|s__UCG-002_unclassified	0	0	0.61026	0.11446	0.06733	0.03827	0	0	0.0475	0	0.28103	0.19627	0.2679	0.1215	0.05422	0.37833	0.12767	0.09875	0.02749	0.54979	0.01181	0.02017	0	0	0	0	0	0	0.03406	0	5.53691	5.29178	0.00638	0.00538	0	0.07168	0.00814	0.01096	0	0	0	0	0	0	0	0	0	0	0
d__Bacteria|p__Firmicutes|c__Clostridia|o__Oscillospirales|f__Oscillospiraceae|g__UCG-003	0	0	0.281	0	0	0.06123	0	0	0.20017	0.39461	0.17131	0.11546	0.1238	0.06573	0	0.17025	0.03372	0.07461	0.00515	0.02972	0.01519	0.01176	0	0.22005	0	0	0	0	0	0	0.29837	1.4771	0	0	0	0	0.07976	0.13152	0	0	0	0	0	0	0	0	0	0	0
d__Bacteria|p__Firmicutes|c__Clostridia|o__Oscillospirales|f__Oscillospiraceae|g__UCG-003|s__UCG-003_unclassified	0	0	0.281	0	0	0.06123	0	0	0.20017	0.39461	0.17131	0.11546	0.1238	0.06573	0	0.17025	0.03372	0.07461	0.00515	0.02972	0.01519	0.01176	0	0.22005	0	0	0	0	0	0	0.29837	1.4771	0	0	0	0	0.07976	0.13152	0	0	0	0	0	0	0	0	0	0	0
[truncated: 1,235 more rows]
[truncated: 31 more columns]
