# Supplementary material for: Alteration of Colonic Bacterial and Fungal Composition and Their Inter- and Intra-Kingdom Interaction in Patients with Adenomas with Low-Grade Dysplasia
Source: Microorganisms. 2023 May 18;11(5):1327. doi: 10.3390/microorganisms11051327 (PMC10223777; doi:10.3390/microorganisms11051327)
Supplement: Supplementary file 1 [file microorganisms-11-01327-s001.zip › Table S2 Fungi LEfSe_Group_P_vs_N.xlsx]

## Sheet: Sheet1
Group	NC1	ALGD1	NC2	ALGD2	NC3	ALGD3	NC4	ALGD4	NC5	ALGD5	NC6	ALGD6	NC7	ALGD7	NC8	ALGD8	NC9	ALGD9	NC10	ALGD10	NC11	ALGD11	NC12	ALGD12	NC13	ALGD13	NC14	ALGD14	NC15	ALGD15	NC16	ALGD16	NC17	ALGD17	NC18	ALGD18	NC19	ALGD19	NC20	ALGD20	NC21	ALGD21	NC22	ALGD22	NC23	ALGD23	NC24	ALGD24	NC25
d__Fungi	100	100	100	100	100	100	100	100	100	100	100	100	100	100	100	100	100	100	100	100	100	100	100	100	100	100	100	100	100	100	100	100	100	100	100	100	100	100	100	100	100	100	100	100	100	100	100	100	100
d__Fungi|p__Ascomycota	88.7566	18.9814	98.8091	80.1707	62.3011	87.3855	96.2403	94.8329	99.9866	88.6952	99.2619	91.2123	19.0926	99.9893	67.6217	90.8177	97.1953	33.6778	63.7431	43.6264	97.2729	40.4152	32.5516	77.0838	8.47914	20.1593	60.4478	96.8671	76.9489	95.9184	3.11091	93.0902	91.4156	42.8339	72.1354	14.0036	65.5228	96.5119	13.8424	97.1324	89.5826	99.3382	93.5038	82.509	90.5477	15.4058	56.5041	99.976	98.713
d__Fungi|p__Ascomycota|c__Arthoniomycetes	0	0	0	0	0	0	0	0	0	0	0	0	0	0	0	0	0	0	0	0	0	0	0	0	0.00493	0.00513	0	0	0	0	0	0	0	0	0	0	0	0	0	0	0	0	0	0	0	0	0	0	0
d__Fungi|p__Ascomycota|c__Arthoniomycetes|o__Lichenostigmatales	0	0	0	0	0	0	0	0	0	0	0	0	0	0	0	0	0	0	0	0	0	0	0	0	0.00493	0.00513	0	0	0	0	0	0	0	0	0	0	0	0	0	0	0	0	0	0	0	0	0	0	0
d__Fungi|p__Ascomycota|c__Arthoniomycetes|o__Lichenostigmatales|f__Phaeococcomycetaceae	0	0	0	0	0	0	0	0	0	0	0	0	0	0	0	0	0	0	0	0	0	0	0	0	0.00493	0.00513	0	0	0	0	0	0	0	0	0	0	0	0	0	0	0	0	0	0	0	0	0	0	0
d__Fungi|p__Ascomycota|c__Arthoniomycetes|o__Lichenostigmatales|f__Phaeococcomycetaceae|g__Phaeococcomyces	0	0	0	0	0	0	0	0	0	0	0	0	0	0	0	0	0	0	0	0	0	0	0	0	0.00493	0.00513	0	0	0	0	0	0	0	0	0	0	0	0	0	0	0	0	0	0	0	0	0	0	0
d__Fungi|p__Ascomycota|c__Arthoniomycetes|o__Lichenostigmatales|f__Phaeococcomycetaceae|g__Phaeococcomyces|s__Phaeococcomyces_eucalypti	0	0	0	0	0	0	0	0	0	0	0	0	0	0	0	0	0	0	0	0	0	0	0	0	0.00493	0.00513	0	0	0	0	0	0	0	0	0	0	0	0	0	0	0	0	0	0	0	0	0	0	0
d__Fungi|p__Ascomycota|c__Ascomycota_unclassified	0.46757	0.18255	2.01469	79.7896	0	10.9357	0.03704	0	1.46387	0	0.18063	0.01817	0	0	0.08189	1.93664	34.5297	1.36351	41.9726	0.04627	96.3811	0.0044	0.05024	0.00947	2.46611	0.48102	0	0	4.12872	0	0.00363	0.03707	0.06037	0.69569	0.00624	0.05308	0.04415	0	0.45671	17.1165	0.01014	20.9941	0.00742	0	12.7843	0.00492	0.12945	0	0.01857
d__Fungi|p__Ascomycota|c__Ascomycota_unclassified|o__Ascomycota_unclassified	0.46757	0.18255	2.01469	79.7896	0	10.9357	0.03704	0	1.46387	0	0.18063	0.01817	0	0	0.08189	1.93664	34.5297	1.36351	41.9726	0.04627	96.3811	0.0044	0.05024	0.00947	2.46611	0.48102	0	0	4.12872	0	0.00363	0.03707	0.06037	0.69569	0.00624	0.05308	0.04415	0	0.45671	17.1165	0.01014	20.9941	0.00742	0	12.7843	0.00492	0.12945	0	0.01857
d__Fungi|p__Ascomycota|c__Ascomycota_unclassified|o__Ascomycota_unclassified|f__Ascomycota_unclassified	0.46757	0.18255	2.01469	79.7896	0	10.9357	0.03704	0	1.46387	0	0.18063	0.01817	0	0	0.08189	1.93664	34.5297	1.36351	41.9726	0.04627	96.3811	0.0044	0.05024	0.00947	2.46611	0.48102	0	0	4.12872	0	0.00363	0.03707	0.06037	0.69569	0.00624	0.05308	0.04415	0	0.45671	17.1165	0.01014	20.9941	0.00742	0	12.7843	0.00492	0.12945	0	0.01857
d__Fungi|p__Ascomycota|c__Ascomycota_unclassified|o__Ascomycota_unclassified|f__Ascomycota_unclassified|g__Ascomycota_unclassified	0.46757	0.18255	2.01469	79.7896	0	10.9357	0.03704	0	1.46387	0	0.18063	0.01817	0	0	0.08189	1.93664	34.5297	1.36351	41.9726	0.04627	96.3811	0.0044	0.05024	0.00947	2.46611	0.48102	0	0	4.12872	0	0.00363	0.03707	0.06037	0.69569	0.00624	0.05308	0.04415	0	0.45671	17.1165	0.01014	20.9941	0.00742	0	12.7843	0.00492	0.12945	0	0.01857
d__Fungi|p__Ascomycota|c__Ascomycota_unclassified|o__Ascomycota_unclassified|f__Ascomycota_unclassified|g__Ascomycota_unclassified|s__Ascomycota_unclassified	0.46757	0.18255	2.01469	79.7896	0	10.9357	0.03704	0	1.46387	0	0.18063	0.01817	0	0	0.08189	1.93664	34.5297	1.36351	41.9726	0.04627	96.3811	0.0044	0.05024	0.00947	2.46611	0.48102	0	0	4.12872	0	0.00363	0.03707	0.06037	0.69569	0.00624	0.05308	0.04415	0	0.45671	17.1165	0.01014	20.9941	0.00742	0	12.7843	0.00492	0.12945	0	0.01857
d__Fungi|p__Ascomycota|c__Dothideomycetes	33.4465	3.0041	84.4637	0.20086	34.4477	14.7217	67.0911	26.6159	14.7991	42.8651	84.0623	48.6807	0.06423	93.8415	37.5301	21.9133	4.95657	0.36874	13.3651	3.38529	0	32.1222	13.6047	68.1866	0.35001	2.57058	0.10537	96.5415	30.9826	49.4095	0.04238	1.14327	8.03855	23.4202	0.36064	0.02468	31.8525	16.8617	7.06101	42.443	30.2747	0.56127	15.2814	20.6591	20.152	11.4056	1.02333	0.05855	5.01093
d__Fungi|p__Ascomycota|c__Dothideomycetes|o__Botryosphaeriales	11.4634	0	0	0	0	0	0	0	0	0	0	0	0	0	0	0	0	0	0	0	0	0	0	0.02011	0	0	0	0	0	0	0	0	0	0.00882	0	0	0.01218	0	0	0.02048	0	0.03974	0	0	0.00374	0	0	0	0
d__Fungi|p__Ascomycota|c__Dothideomycetes|o__Botryosphaeriales|f__Botryosphaeriaceae	11.4634	0	0	0	0	0	0	0	0	0	0	0	0	0	0	0	0	0	0	0	0	0	0	0.02011	0	0	0	0	0	0	0	0	0	0.00882	0	0	0.01218	0	0	0.02048	0	0.03974	0	0	0.00374	0	0	0	0
d__Fungi|p__Ascomycota|c__Dothideomycetes|o__Botryosphaeriales|f__Botryosphaeriaceae|g__Botryosphaeria	0	0	0	0	0	0	0	0	0	0	0	0	0	0	0	0	0	0	0	0	0	0	0	0.02011	0	0	0	0	0	0	0	0	0	0.00882	0	0	0	0	0	0	0	0.03974	0	0	0	0	0	0	0
d__Fungi|p__Ascomycota|c__Dothideomycetes|o__Botryosphaeriales|f__Botryosphaeriaceae|g__Botryosphaeria|s__Botryosphaeria_dothidea	0	0	0	0	0	0	0	0	0	0	0	0	0	0	0	0	0	0	0	0	0	0	0	0.02011	0	0	0	0	0	0	0	0	0	0.00882	0	0	0	0	0	0	0	0.03974	0	0	0	0	0	0	0
d__Fungi|p__Ascomycota|c__Dothideomycetes|o__Botryosphaeriales|f__Botryosphaeriaceae|g__Guignardia	11.4634	0	0	0	0	0	0	0	0	0	0	0	0	0	0	0	0	0	0	0	0	0	0	0	0	0	0	0	0	0	0	0	0	0	0	0	0.01218	0	0	0.02048	0	0	0	0	0.00374	0	0	0	0
d__Fungi|p__Ascomycota|c__Dothideomycetes|o__Botryosphaeriales|f__Botryosphaeriaceae|g__Guignardia|s__Guignardia_mangiferae	11.4634	0	0	0	0	0	0	0	0	0	0	0	0	0	0	0	0	0	0	0	0	0	0	0	0	0	0	0	0	0	0	0	0	0	0	0	0.01218	0	0	0.02048	0	0	0	0	0.00374	0	0	0	0
d__Fungi|p__Ascomycota|c__Dothideomycetes|o__Botryosphaeriales|f__Botryosphaeriaceae|g__Microdiplodia	0	0	0	0	0	0	0	0	0	0	0	0	0	0	0	0	0	0	0	0	0	0	0	0	0	0	0	0	0	0	0	0	0	0	0	0	0	0	0	0	0	0	0	0	0	0	0	0	0
d__Fungi|p__Ascomycota|c__Dothideomycetes|o__Botryosphaeriales|f__Botryosphaeriaceae|g__Microdiplodia|s__Microdiplodia_miyakei	0	0	0	0	0	0	0	0	0	0	0	0	0	0	0	0	0	0	0	0	0	0	0	0	0	0	0	0	0	0	0	0	0	0	0	0	0	0	0	0	0	0	0	0	0	0	0	0	0
d__Fungi|p__Ascomycota|c__Dothideomycetes|o__Capnodiales	21.4938	0.23891	0	0.01461	0.00512	6.38853	0.13026	9.22147	5.267	2.31823	11.2209	0.03374	0.00937	5.62206	0.2767	12.5729	0.00869	0.36324	0.01005	0.01218	0	0.08221	2.99703	0.02721	0.17501	0.40662	0.00599	0.01038	0.05148	49.3455	0.0218	1.10859	0.03854	16.7645	0.20216	0.01234	1.34134	1.32917	6.98212	8.92332	0.09639	0.18874	9.69979	20.5059	12.8491	11.3737	0.06041	0.03003	4.11387
d__Fungi|p__Ascomycota|c__Dothideomycetes|o__Capnodiales|f__Capnodiales_Incertae_sedis	0	0	0	0	0	0	0	0	0	0	0	0	0	0	0	0	0	0	0	0	0	0	0.00251	0	0	0	0	0	0	0	0	0	0	0	0	0	0	0	0	0	0	0	0	0	0	0	0	0	0
d__Fungi|p__Ascomycota|c__Dothideomycetes|o__Capnodiales|f__Capnodiales_Incertae_sedis|g__Toxicocladosporium	0	0	0	0	0	0	0	0	0	0	0	0	0	0	0	0	0	0	0	0	0	0	0.00251	0	0	0	0	0	0	0	0	0	0	0	0	0	0	0	0	0	0	0	0	0	0	0	0	0	0
d__Fungi|p__Ascomycota|c__Dothideomycetes|o__Capnodiales|f__Capnodiales_Incertae_sedis|g__Toxicocladosporium|s__Toxicocladosporium_unclassified	0	0	0	0	0	0	0	0	0	0	0	0	0	0	0	0	0	0	0	0	0	0	0.00251	0	0	0	0	0	0	0	0	0	0	0	0	0	0	0	0	0	0	0	0	0	0	0	0	0	0
d__Fungi|p__Ascomycota|c__Dothideomycetes|o__Capnodiales|f__Capnodiales_unclassified	0	0	0	0	0	0	0	0	0	0	0	0	0	0	0	0	0	0	0	0	0	0	0.00628	0	0.00986	0	0	0	0	0	0	0	0	0	0	0	0	0	0	0	0	0	0	0	0	0	0	0	0
d__Fungi|p__Ascomycota|c__Dothideomycetes|o__Capnodiales|f__Capnodiales_unclassified|g__Capnodiales_unclassified	0	0	0	0	0	0	0	0	0	0	0	0	0	0	0	0	0	0	0	0	0	0	0.00628	0	0.00986	0	0	0	0	0	0	0	0	0	0	0	0	0	0	0	0	0	0	0	0	0	0	0	0
d__Fungi|p__Ascomycota|c__Dothideomycetes|o__Capnodiales|f__Capnodiales_unclassified|g__Capnodiales_unclassified|s__Capnodiales_unclassified	0	0	0	0	0	0	0	0	0	0	0	0	0	0	0	0	0	0	0	0	0	0	0.00628	0	0.00986	0	0	0	0	0	0	0	0	0	0	0	0	0	0	0	0	0	0	0	0	0	0	0	0
d__Fungi|p__Ascomycota|c__Dothideomycetes|o__Capnodiales|f__Extremaceae	0	0	0	0	0	0	0	0	0	0	0	0	0	0	0	0	0	0	0	0	0	0	0	0	0	0	0	0	0	0	0	0	0	0	0	0	0	0	6.98212	0	0	0	0	0	0	0	0	0	0
d__Fungi|p__Ascomycota|c__Dothideomycetes|o__Capnodiales|f__Extremaceae|g__Vermiconia	0	0	0	0	0	0	0	0	0	0	0	0	0	0	0	0	0	0	0	0	0	0	0	0	0	0	0	0	0	0	0	0	0	0	0	0	0	0	6.98212	0	0	0	0	0	0	0	0	0	0
d__Fungi|p__Ascomycota|c__Dothideomycetes|o__Capnodiales|f__Extremaceae|g__Vermiconia|s__Vermiconia_calcicola	0	0	0	0	0	0	0	0	0	0	0	0	0	0	0	0	0	0	0	0	0	0	0	0	0	0	0	0	0	0	0	0	0	0	0	0	0	0	6.98212	0	0	0	0	0	0	0	0	0	0
d__Fungi|p__Ascomycota|c__Dothideomycetes|o__Capnodiales|f__Mycosphaerellaceae	21.4938	0.23891	0	0.01461	0.00512	6.38853	0.13026	9.22147	5.267	2.31823	11.2209	0.03374	0.00937	5.62206	0.2767	12.5729	0.00869	0.36324	0.01005	0.01218	0	0.08221	2.97945	0.02721	0.16515	0.40662	0.00599	0.01038	0.05148	49.3455	0.0218	1.10859	0.03854	16.7645	0.20216	0.01234	1.34134	1.32917	0	8.92332	0.09639	0.18874	9.69979	20.5059	12.8491	11.3737	0.06041	0.03003	4.11387
d__Fungi|p__Ascomycota|c__Dothideomycetes|o__Capnodiales|f__Mycosphaerellaceae|g__Cladosporium	0	0	0	0	0	0.05621	0	0	2.42924	0	0	0	0	0	0	0.0389	0	0	0.01005	0	0	0	0	0.01065	0	0	0.00599	0	0	0	0	0	0.03597	0.33776	0	0	1.22563	0	0	0	0.07102	0	0	0	0.06729	11.3737	0.00616	0.01952	4.09245
d__Fungi|p__Ascomycota|c__Dothideomycetes|o__Capnodiales|f__Mycosphaerellaceae|g__Cladosporium|s__Cladosporium_dominicanum	0	0	0	0	0	0.05621	0	0	2.24686	0	0	0	0	0	0	0.0389	0	0	0.01005	0	0	0	0	0.01065	0	0	0.00599	0	0	0	0	0	0.03597	0.2508	0	0	0.40956	0	0	0	0.02917	0	0	0	0.06729	0	0.00616	0	0.10999
d__Fungi|p__Ascomycota|c__Dothideomycetes|o__Capnodiales|f__Mycosphaerellaceae|g__Cladosporium|s__Cladosporium_halotolerans	0	0	0	0	0	0	0	0	0	0	0	0	0	0	0	0	0	0	0	0	0	0	0	0	0	0	0	0	0	0	0	0	0	0.08696	0	0	0.81607	0	0	0	0.04185	0	0	0	0	11.3737	0	0.01952	3.98246
d__Fungi|p__Ascomycota|c__Dothideomycetes|o__Capnodiales|f__Mycosphaerellaceae|g__Cladosporium|s__Cladosporium_unclassified	0	0	0	0	0	0	0	0	0.18238	0	0	0	0	0	0	0	0	0	0	0	0	0	0	0	0	0	0	0	0	0	0	0	0	0	0	0	0	0	0	0	0	0	0	0	0	0	0	0	0
d__Fungi|p__Ascomycota|c__Dothideomycetes|o__Capnodiales|f__Mycosphaerellaceae|g__Davidiella	3.70916	0	0	0.01096	0.00512	6.31561	0.12643	9.22147	2.6566	2.31823	11.2209	0.03374	0.00937	5.62206	0.2767	12.534	0.00869	0.36324	0	0.01218	0	0.08221	2.56871	0.01301	0.07271	0.02822	0	0.00649	0.03036	49.3455	0.0218	1.10859	0	16.4268	0.1485	0.01234	0.11571	1.32917	0	8.92332	0.02283	0.18874	7.44417	20.4985	0	0	0.04808	0.00751	0.01428
d__Fungi|p__Ascomycota|c__Dothideomycetes|o__Capnodiales|f__Mycosphaerellaceae|g__Davidiella|s__Davidiella_unclassified	3.70916	0	0	0.01096	0.00512	6.31561	0.12643	9.22147	2.6566	2.31823	11.2209	0.03374	0.00937	5.62206	0.2767	12.534	0.00869	0.36324	0	0.01218	0	0.08221	2.56871	0.01301	0.07271	0.02822	0	0.00649	0.03036	49.3455	0.0218	1.10859	0	16.4268	0.1485	0.01234	0.11571	1.32917	0	8.92332	0.02283	0.18874	7.44417	20.4985	0	0	0.04808	0.00751	0.01428
d__Fungi|p__Ascomycota|c__Dothideomycetes|o__Capnodiales|f__Mycosphaerellaceae|g__Mycosphaerella	17.7846	0.23891	0	0.00365	0	0	0.00383	0	0	0	0	0	0	0	0	0	0	0	0	0	0	0	0	0.00355	0.08135	0.36429	0	0.00389	0.02112	0	0	0	0.00257	0	0.05366	0	0	0	0	0	0.00254	0	2.25562	0.00741	12.7818	0	0.00617	0.003	0.00714
d__Fungi|p__Ascomycota|c__Dothideomycetes|o__Capnodiales|f__Mycosphaerellaceae|g__Mycosphaerellaceae_unclassified	0	0	0	0	0	0.01671	0	0	0.18116	0	0	0	0	0	0	0	0	0	0	0	0	0	0.00879	0	0	0.0077	0	0	0	0	0	0	0	0	0	0	0	0	0	0	0	0	0	0	0	0	0	0	0
d__Fungi|p__Ascomycota|c__Dothideomycetes|o__Capnodiales|f__Mycosphaerellaceae|g__Mycosphaerellaceae_unclassified|s__Mycosphaerellaceae_unclassified	0	0	0	0	0	0.01671	0	0	0.18116	0	0	0	0	0	0	0	0	0	0	0	0	0	0.00879	0	0	0.0077	0	0	0	0	0	0	0	0	0	0	0	0	0	0	0	0	0	0	0	0	0	0	0
d__Fungi|p__Ascomycota|c__Dothideomycetes|o__Capnodiales|f__Mycosphaerellaceae|g__Mycosphaerella|s__Cercospora_apii	0	0.23891	0	0.00365	0	0	0.00383	0	0	0	0	0	0	0	0	0	0	0	0	0	0	0	0	0	0.00986	0.27707	0	0.00389	0	0	0	0	0.00257	0	0.05366	0	0	0	0	0	0.00254	0	2.25562	0.00741	0	0	0	0	0.00714
d__Fungi|p__Ascomycota|c__Dothideomycetes|o__Capnodiales|f__Mycosphaerellaceae|g__Mycosphaerella|s__Dissoconium_dekkeri	0	0	0	0	0	0	0	0	0	0	0	0	0	0	0	0	0	0	0	0	0	0	0	0	0.0037	0	0	0	0	0	0	0	0	0	0	0	0	0	0	0	0	0	0	0	0	0	0	0	0
d__Fungi|p__Ascomycota|c__Dothideomycetes|o__Capnodiales|f__Mycosphaerellaceae|g__Mycosphaerella|s__Mycosphaerella_aurantia	0	0	0	0	0	0	0	0	0	0	0	0	0	0	0	0	0	0	0	0	0	0	0	0	0	0.00513	0	0	0.00264	0	0	0	0	0	0	0	0	0	0	0	0	0	0	0	0	0	0	0	0
d__Fungi|p__Ascomycota|c__Dothideomycetes|o__Capnodiales|f__Mycosphaerellaceae|g__Mycosphaerella|s__Mycosphaerella_intermedia	0	0	0	0	0	0	0	0	0	0	0	0	0	0	0	0	0	0	0	0	0	0	0	0	0.03944	0.05387	0	0	0	0	0	0	0	0	0	0	0	0	0	0	0	0	0	0	0	0	0.00247	0	0
d__Fungi|p__Ascomycota|c__Dothideomycetes|o__Capnodiales|f__Mycosphaerellaceae|g__Mycosphaerella|s__Mycosphaerella_quasiparkii	17.7846	0	0	0	0	0	0	0	0	0	0	0	0	0	0	0	0	0	0	0	0	0	0	0	0	0	0	0	0	0	0	0	0	0	0	0	0	0	0	0	0	0	0	0	0	0	0	0	0
d__Fungi|p__Ascomycota|c__Dothideomycetes|o__Capnodiales|f__Mycosphaerellaceae|g__Mycosphaerella|s__Mycosphaerella_unclassified	0	0	0	0	0	0	0	0	0	0	0	0	0	0	0	0	0	0	0	0	0	0	0	0.00355	0.02835	0.02822	0	0	0.01848	0	0	0	0	0	0	0	0	0	0	0	0	0	0	0	12.7818	0	0.0037	0.003	0
d__Fungi|p__Ascomycota|c__Dothideomycetes|o__Capnodiales|f__Mycosphaerellaceae|g__Passalora	0	0	0	0	0	0	0	0	0	0	0	0	0	0	0	0	0	0	0	0	0	0	0	0	0	0.00641	0	0	0	0	0	0	0	0	0	0	0	0	0	0	0	0	0	0	0	0	0	0	0
d__Fungi|p__Ascomycota|c__Dothideomycetes|o__Capnodiales|f__Mycosphaerellaceae|g__Passalora|s__Passalora_zambiae	0	0	0	0	0	0	0	0	0	0	0	0	0	0	0	0	0	0	0	0	0	0	0	0	0	0.00641	0	0	0	0	0	0	0	0	0	0	0	0	0	0	0	0	0	0	0	0	0	0	0
d__Fungi|p__Ascomycota|c__Dothideomycetes|o__Capnodiales|f__Mycosphaerellaceae|g__Phloeospora	0	0	0	0	0	0	0	0	0	0	0	0	0	0	0	0	0	0	0	0	0	0	0	0	0.01109	0	0	0	0	0	0	0	0	0	0	0	0	0	0	0	0	0	0	0	0	0	0	0	0
d__Fungi|p__Ascomycota|c__Dothideomycetes|o__Capnodiales|f__Mycosphaerellaceae|g__Phloeospora|s__Phloeospora_mimosae_pigrae	0	0	0	0	0	0	0	0	0	0	0	0	0	0	0	0	0	0	0	0	0	0	0	0	0.01109	0	0	0	0	0	0	0	0	0	0	0	0	0	0	0	0	0	0	0	0	0	0	0	0
d__Fungi|p__Ascomycota|c__Dothideomycetes|o__Capnodiales|f__Mycosphaerellaceae|g__Pseudocercospora	0	0	0	0	0	0	0	0	0	0	0	0	0	0	0	0	0	0	0	0	0	0	0.40195	0	0	0	0	0	0	0	0	0	0	0	0	0	0	0	0	0	0	0	0	0	0	0	0	0	0
d__Fungi|p__Ascomycota|c__Dothideomycetes|o__Capnodiales|f__Mycosphaerellaceae|g__Pseudocercospora|s__Pseudocercospora_unclassified	0	0	0	0	0	0	0	0	0	0	0	0	0	0	0	0	0	0	0	0	0	0	0.40195	0	0	0	0	0	0	0	0	0	0	0	0	0	0	0	0	0	0	0	0	0	0	0	0	0	0
d__Fungi|p__Ascomycota|c__Dothideomycetes|o__Capnodiales|f__Teratosphaeriaceae	0	0	0	0	0	0	0	0	0	0	0	0	0	0	0	0	0	0	0	0	0	0	0.00879	0	0	0	0	0	0	0	0	0	0	0	0	0	0	0	0	0	0	0	0	0	0	0	0	0	0
d__Fungi|p__Ascomycota|c__Dothideomycetes|o__Capnodiales|f__Teratosphaeriaceae|g__Teratosphaeria	0	0	0	0	0	0	0	0	0	0	0	0	0	0	0	0	0	0	0	0	0	0	0.00628	0	0	0	0	0	0	0	0	0	0	0	0	0	0	0	0	0	0	0	0	0	0	0	0	0	0
d__Fungi|p__Ascomycota|c__Dothideomycetes|o__Capnodiales|f__Teratosphaeriaceae|g__Teratosphaeriaceae_unclassified	0	0	0	0	0	0	0	0	0	0	0	0	0	0	0	0	0	0	0	0	0	0	0.00251	0	0	0	0	0	0	0	0	0	0	0	0	0	0	0	0	0	0	0	0	0	0	0	0	0	0
d__Fungi|p__Ascomycota|c__Dothideomycetes|o__Capnodiales|f__Teratosphaeriaceae|g__Teratosphaeriaceae_unclassified|s__Teratosphaeriaceae_unclassified	0	0	0	0	0	0	0	0	0	0	0	0	0	0	0	0	0	0	0	0	0	0	0.00251	0	0	0	0	0	0	0	0	0	0	0	0	0	0	0	0	0	0	0	0	0	0	0	0	0	0
d__Fungi|p__Ascomycota|c__Dothideomycetes|o__Capnodiales|f__Teratosphaeriaceae|g__Teratosphaeria|s__Teratosphaeria_capensis	0	0	0	0	0	0	0	0	0	0	0	0	0	0	0	0	0	0	0	0	0	0	0.00628	0	0	0	0	0	0	0	0	0	0	0	0	0	0	0	0	0	0	0	0	0	0	0	0	0	0
d__Fungi|p__Ascomycota|c__Dothideomycetes|o__Dothideales	0	0	0	0	0	0	0	0	0	17.9533	0	0	0	0	0	0	0	0	0	0	0	0	0.00251	0	0.05053	0.05259	0	0	0	0	0	0	0	0.00378	0	0	0.05024	0	0.02076	0	0	0	0	0	0	0	0.0111	0.003	0
d__Fungi|p__Ascomycota|c__Dothideomycetes|o__Dothideales|f__Dothioraceae	0	0	0	0	0	0	0	0	0	17.9533	0	0	0	0	0	0	0	0	0	0	0	0	0.00251	0	0.05053	0.05259	0	0	0	0	0	0	0	0.00378	0	0	0.05024	0	0.02076	0	0	0	0	0	0	0	0.0111	0.003	0
d__Fungi|p__Ascomycota|c__Dothideomycetes|o__Dothideales|f__Dothioraceae|g__Kabatiella	0	0	0	0	0	0	0	0	0	17.9533	0	0	0	0	0	0	0	0	0	0	0	0	0.00251	0	0.05053	0.05259	0	0	0	0	0	0	0	0.00378	0	0	0.05024	0	0.02076	0	0	0	0	0	0	0	0.0111	0.003	0
d__Fungi|p__Ascomycota|c__Dothideomycetes|o__Dothideales|f__Dothioraceae|g__Kabatiella|s__Aureobasidium_pullulans	0	0	0	0	0	0	0	0	0	0	0	0	0	0	0	0	0	0	0	0	0	0	0	0	0.05053	0.05259	0	0	0	0	0	0	0	0.00378	0	0	0.05024	0	0.02076	0	0	0	0	0	0	0	0.0111	0.003	0
d__Fungi|p__Ascomycota|c__Dothideomycetes|o__Dothideales|f__Dothioraceae|g__Kabatiella|s__Kabatiella_unclassified	0	0	0	0	0	0	0	0	0	17.9533	0	0	0	0	0	0	0	0	0	0	0	0	0.00251	0	0	0	0	0	0	0	0	0	0	0	0	0	0	0	0	0	0	0	0	0	0	0	0	0	0
d__Fungi|p__Ascomycota|c__Dothideomycetes|o__Dothideomycetes_Incertae_sedis	0	0	0	0.00365	0	0	0.00255	0	0	0	0	0.0026	0	0	0	0	0	0	0.00377	0.00731	0	0.0044	0	0	0	0.00385	0	0.00259	0	0	0	0.00359	0.00514	0	0	0	0	0	0	0	0.00634	0	0.00371	0	0.27163	0	0.79274	0	0
d__Fungi|p__Ascomycota|c__Dothideomycetes|o__Dothideomycetes_Incertae_sedis|f__Dothideomycetes_Incertae_sedis	0	0	0	0	0	0	0	0	0	0	0	0	0	0	0	0	0	0	0	0	0	0	0	0	0	0	0	0.00259	0	0	0	0	0	0	0	0	0	0	0	0	0	0	0	0	0	0	0	0	0
d__Fungi|p__Ascomycota|c__Dothideomycetes|o__Dothideomycetes_Incertae_sedis|f__Dothideomycetes_Incertae_sedis|g__Rhizopycnis	0	0	0	0	0	0	0	0	0	0	0	0	0	0	0	0	0	0	0	0	0	0	0	0	0	0	0	0.00259	0	0	0	0	0	0	0	0	0	0	0	0	0	0	0	0	0	0	0	0	0
d__Fungi|p__Ascomycota|c__Dothideomycetes|o__Dothideomycetes_Incertae_sedis|f__Dothideomycetes_Incertae_sedis|g__Rhizopycnis|s__Rhizopycnis_vagum	0	0	0	0	0	0	0	0	0	0	0	0	0	0	0	0	0	0	0	0	0	0	0	0	0	0	0	0.00259	0	0	0	0	0	0	0	0	0	0	0	0	0	0	0	0	0	0	0	0	0
d__Fungi|p__Ascomycota|c__Dothideomycetes|o__Dothideomycetes_Incertae_sedis|f__Gloniaceae	0	0	0	0	0	0	0	0	0	0	0	0	0	0	0	0	0	0	0	0	0	0	0	0	0	0	0	0	0	0	0	0	0	0	0	0	0	0	0	0	0	0	0	0	0	0	0	0	0
d__Fungi|p__Ascomycota|c__Dothideomycetes|o__Dothideomycetes_Incertae_sedis|f__Gloniaceae|g__Cenococcum	0	0	0	0	0	0	0	0	0	0	0	0	0	0	0	0	0	0	0	0	0	0	0	0	0	0	0	0	0	0	0	0	0	0	0	0	0	0	0	0	0	0	0	0	0	0	0	0	0
d__Fungi|p__Ascomycota|c__Dothideomycetes|o__Dothideomycetes_Incertae_sedis|f__Gloniaceae|g__Cenococcum|s__Cenococcum_unclassified	0	0	0	0	0	0	0	0	0	0	0	0	0	0	0	0	0	0	0	0	0	0	0	0	0	0	0	0	0	0	0	0	0	0	0	0	0	0	0	0	0	0	0	0	0	0	0	0	0
d__Fungi|p__Ascomycota|c__Dothideomycetes|o__Dothideomycetes_Incertae_sedis|f__Myxotrichaceae	0	0	0	0	0	0	0	0	0	0	0	0	0	0	0	0	0	0	0	0	0	0	0	0	0	0.00385	0	0	0	0	0	0	0	0	0	0	0	0	0	0	0	0	0	0	0.27163	0	0.00247	0	0
d__Fungi|p__Ascomycota|c__Dothideomycetes|o__Dothideomycetes_Incertae_sedis|f__Myxotrichaceae|g__Gymnostellatospora	0	0	0	0	0	0	0	0	0	0	0	0	0	0	0	0	0	0	0	0	0	0	0	0	0	0	0	0	0	0	0	0	0	0	0	0	0	0	0	0	0	0	0	0	0	0	0	0	0
d__Fungi|p__Ascomycota|c__Dothideomycetes|o__Dothideomycetes_Incertae_sedis|f__Myxotrichaceae|g__Gymnostellatospora|s__Gymnostellatospora_japonica	0	0	0	0	0	0	0	0	0	0	0	0	0	0	0	0	0	0	0	0	0	0	0	0	0	0	0	0	0	0	0	0	0	0	0	0	0	0	0	0	0	0	0	0	0	0	0	0	0
d__Fungi|p__Ascomycota|c__Dothideomycetes|o__Dothideomycetes_Incertae_sedis|f__Myxotrichaceae|g__Oidiodendron	0	0	0	0	0	0	0	0	0	0	0	0	0	0	0	0	0	0	0	0	0	0	0	0	0	0.00385	0	0	0	0	0	0	0	0	0	0	0	0	0	0	0	0	0	0	0.27163	0	0.00247	0	0
d__Fungi|p__Ascomycota|c__Dothideomycetes|o__Dothideomycetes_Incertae_sedis|f__Myxotrichaceae|g__Oidiodendron|s__Oidiodendron_maius	0	0	0	0	0	0	0	0	0	0	0	0	0	0	0	0	0	0	0	0	0	0	0	0	0	0.00385	0	0	0	0	0	0	0	0	0	0	0	0	0	0	0	0	0	0	0	0	0.00247	0	0
d__Fungi|p__Ascomycota|c__Dothideomycetes|o__Dothideomycetes_Incertae_sedis|f__Myxotrichaceae|g__Oidiodendron|s__Oidiodendron_scytaloides	0	0	0	0	0	0	0	0	0	0	0	0	0	0	0	0	0	0	0	0	0	0	0	0	0	0	0	0	0	0	0	0	0	0	0	0	0	0	0	0	0	0	0	0	0.10342	0	0	0	0
d__Fungi|p__Ascomycota|c__Dothideomycetes|o__Dothideomycetes_Incertae_sedis|f__Myxotrichaceae|g__Oidiodendron|s__Oidiodendron_truncatum	0	0	0	0	0	0	0	0	0	0	0	0	0	0	0	0	0	0	0	0	0	0	0	0	0	0	0	0	0	0	0	0	0	0	0	0	0	0	0	0	0	0	0	0	0	0	0	0	0
d__Fungi|p__Ascomycota|c__Dothideomycetes|o__Dothideomycetes_Incertae_sedis|f__Myxotrichaceae|g__Oidiodendron|s__Oidiodendron_unclassified	0	0	0	0	0	0	0	0	0	0	0	0	0	0	0	0	0	0	0	0	0	0	0	0	0	0	0	0	0	0	0	0	0	0	0	0	0	0	0	0	0	0	0	0	0.16821	0	0	0	0
d__Fungi|p__Ascomycota|c__Dothideomycetes|o__Dothideomycetes_Incertae_sedis|f__Pseudeurotiaceae	0	0	0	0.00365	0	0	0.00255	0	0	0	0	0.0026	0	0	0	0	0	0	0.00377	0.00731	0	0.0044	0	0	0	0	0	0	0	0	0	0.00359	0.00514	0	0	0	0	0	0	0	0.00634	0	0.00371	0	0	0	0.79027	0	0
d__Fungi|p__Ascomycota|c__Dothideomycetes|o__Dothideomycetes_Incertae_sedis|f__Pseudeurotiaceae|g__Pseudeurotiaceae_unclassified	0	0	0	0	0	0	0	0	0	0	0	0	0	0	0	0	0	0	0	0	0	0	0	0	0	0	0	0	0	0	0	0.00359	0	0	0	0	0	0	0	0	0	0	0	0	0	0	0.00493	0	0
d__Fungi|p__Ascomycota|c__Dothideomycetes|o__Dothideomycetes_Incertae_sedis|f__Pseudeurotiaceae|g__Pseudeurotiaceae_unclassified|s__Pseudeurotiaceae_unclassified	0	0	0	0	0	0	0	0	0	0	0	0	0	0	0	0	0	0	0	0	0	0	0	0	0	0	0	0	0	0	0	0.00359	0	0	0	0	0	0	0	0	0	0	0	0	0	0	0.00493	0	0
d__Fungi|p__Ascomycota|c__Dothideomycetes|o__Dothideomycetes_Incertae_sedis|f__Pseudeurotiaceae|g__Pseudogymnoascus	0	0	0	0.00365	0	0	0.00255	0	0	0	0	0.0026	0	0	0	0	0	0	0.00377	0.00731	0	0.0044	0	0	0	0	0	0	0	0	0	0	0.00514	0	0	0	0	0	0	0	0.00634	0	0.00371	0	0	0	0.51904	0	0
d__Fungi|p__Ascomycota|c__Dothideomycetes|o__Dothideomycetes_Incertae_sedis|f__Pseudeurotiaceae|g__Pseudogymnoascus|s__Geomyces_sp_BEA_2010	0	0	0	0	0	0	0	0	0	0	0	0	0	0	0	0	0	0	0	0	0	0	0	0	0	0	0	0	0	0	0	0	0	0	0	0	0	0	0	0	0	0	0	0	0	0	0.11836	0	0
d__Fungi|p__Ascomycota|c__Dothideomycetes|o__Dothideomycetes_Incertae_sedis|f__Pseudeurotiaceae|g__Pseudogymnoascus|s__Pseudogymnoascus_roseus	0	0	0	0	0	0	0	0	0	0	0	0	0	0	0	0	0	0	0	0	0	0	0	0	0	0	0	0	0	0	0	0	0	0	0	0	0	0	0	0	0	0	0	0	0	0	0.06041	0	0
d__Fungi|p__Ascomycota|c__Dothideomycetes|o__Dothideomycetes_Incertae_sedis|f__Pseudeurotiaceae|g__Pseudogymnoascus|s__Pseudogymnoascus_unclassified	0	0	0	0.00365	0	0	0.00255	0	0	0	0	0.0026	0	0	0	0	0	0	0.00377	0.00731	0	0.0044	0	0	0	0	0	0	0	0	0	0	0.00514	0	0	0	0	0	0	0	0.00634	0	0.00371	0	0	0	0.34027	0	0
d__Fungi|p__Ascomycota|c__Dothideomycetes|o__Dothideomycetes_Incertae_sedis|f__Pseudeurotiaceae|g__Teberdinia	0	0	0	0	0	0	0	0	0	0	0	0	0	0	0	0	0	0	0	0	0	0	0	0	0	0	0	0	0	0	0	0	0	0	0	0	0	0	0	0	0	0	0	0	0	0	0.2663	0	0
d__Fungi|p__Ascomycota|c__Dothideomycetes|o__Dothideomycetes_Incertae_sedis|f__Pseudeurotiaceae|g__Teberdinia|s__Pseudeurotium_hygrophilum	0	0	0	0	0	0	0	0	0	0	0	0	0	0	0	0	0	0	0	0	0	0	0	0	0	0	0	0	0	0	0	0	0	0	0	0	0	0	0	0	0	0	0	0	0	0	0.09493	0	0
d__Fungi|p__Ascomycota|c__Dothideomycetes|o__Dothideomycetes_Incertae_sedis|f__Pseudeurotiaceae|g__Teberdinia|s__Teberdinia_unclassified	0	0	0	0	0	0	0	0	0	0	0	0	0	0	0	0	0	0	0	0	0	0	0	0	0	0	0	0	0	0	0	0	0	0	0	0	0	0	0	0	0	0	0	0	0	0	0.17137	0	0
d__Fungi|p__Ascomycota|c__Dothideomycetes|o__Dothideomycetes_unclassified	0.37696	0	0	0	0	7.97922	0	0.00378	0.00365	0	0	0	0	0	0.21217	8.99144	0.00621	0.0055	0	0	0	0.00294	0	0.00947	0.00616	0	0	0	12.0654	0.00533	0	0	0	0	0.00624	0	0.01827	0.0104	0	0	0	0	0	0.0284	0	0	0.00863	0	0
d__Fungi|p__Ascomycota|c__Dothideomycetes|o__Dothideomycetes_unclassified|f__Dothideomycetes_unclassified	0.37696	0	0	0	0	7.97922	0	0.00378	0.00365	0	0	0	0	0	0.21217	8.99144	0.00621	0.0055	0	0	0	0.00294	0	0.00947	0.00616	0	0	0	12.0654	0.00533	0	0	0	0	0.00624	0	0.01827	0.0104	0	0	0	0	0	0.0284	0	0	0.00863	0	0
d__Fungi|p__Ascomycota|c__Dothideomycetes|o__Dothideomycetes_unclassified|f__Dothideomycetes_unclassified|g__Dothideomycetes_unclassified	0.37696	0	0	0	0	7.97922	0	0.00378	0.00365	0	0	0	0	0	0.21217	8.99144	0.00621	0.0055	0	0	0	0.00294	0	0.00947	0.00616	0	0	0	12.0654	0.00533	0	0	0	0	0.00624	0	0.01827	0.0104	0	0	0	0	0	0.0284	0	0	0.00863	0	0
d__Fungi|p__Ascomycota|c__Dothideomycetes|o__Dothideomycetes_unclassified|f__Dothideomycetes_unclassified|g__Dothideomycetes_unclassified|s__Dothideomycetes_unclassified	0.37696	0	0	0	0	7.97922	0	0.00378	0.00365	0	0	0	0	0	0.21217	8.99144	0.00621	0.0055	0	0	0	0.00294	0	0.00947	0.00616	0	0	0	12.0654	0.00533	0	0	0	0	0.00624	0	0.01827	0.0104	0	0	0	0	0	0.0284	0	0	0.00863	0	0
d__Fungi|p__Ascomycota|c__Dothideomycetes|o__Myriangiales	0	0	0	0	0	0	0.02682	17.3844	0	0	0	0	0	0	0	0	0	0	0	0	0	0	0	0	0	0	0	0	0	0	0	0	0	0	0	0	0	0.0026	0	0	0	0	0	0	0	0	0	0	0
d__Fungi|p__Ascomycota|c__Dothideomycetes|o__Myriangiales|f__Elsinoaceae	0	0	0	0	0	0	0.02682	17.3844	0	0	0	0	0	0	0	0	0	0	0	0	0	0	0	0	0	0	0	0	0	0	0	0	0	0	0	0	0	0.0026	0	0	0	0	0	0	0	0	0	0	0
d__Fungi|p__Ascomycota|c__Dothideomycetes|o__Myriangiales|f__Elsinoaceae|g__Elsinoe	0	0	0	0	0	0	0.02682	17.3844	0	0	0	0	0	0	0	0	0	0	0	0	0	0	0	0	0	0	0	0	0	0	0	0	0	0	0	0	0	0.0026	0	0	0	0	0	0	0	0	0	0	0
d__Fungi|p__Ascomycota|c__Dothideomycetes|o__Myriangiales|f__Elsinoaceae|g__Elsinoe|s__Elsinoe_fawcettii	0	0	0	0	0	0	0.02682	17.3844	0	0	0	0	0	0	0	0	0	0	0	0	0	0	0	0	0	0	0	0	0	0	0	0	0	0	0	0	0	0.0026	0	0	0	0	0	0	0	0	0	0	0
d__Fungi|p__Ascomycota|c__Dothideomycetes|o__Pleosporales	0.11237	2.76519	84.4637	0.1826	34.4426	0.35399	66.9315	0.00629	9.5285	22.5935	72.8414	48.6444	0.05486	88.1981	37.0412	0.34892	4.94167	0	13.3513	3.3658	0	32.0326	10.6052	68.1298	0.11831	2.10752	0.09938	96.5285	18.8657	0.05864	0.02058	0.03109	7.99487	6.64304	0.15224	0.01234	30.4304	15.5196	0.05813	33.4992	30.1719	0.33279	5.57788	0.1247	7.02761	0.03195	0.15045	0.02552	0.89706
d__Fungi|p__Ascomycota|c__Dothideomycetes|o__Pleosporales|f__Corynesporascaceae	0	0	0	0	0	0	0	0	0	0	0	0	0	0	0	0	0	0	0	0	0	0	0	0	0	0	0	0	0	0	0	0	0	0.16888	0.00374	0	0	0	0	0	0	0	0	0	0	0	0	0	0
d__Fungi|p__Ascomycota|c__Dothideomycetes|o__Pleosporales|f__Corynesporascaceae|g__Corynespora	0	0	0	0	0	0	0	0	0	0	0	0	0	0	0	0	0	0	0	0	0	0	0	0	0	0	0	0	0	0	0	0	0	0.16888	0.00374	0	0	0	0	0	0	0	0	0	0	0	0	0	0
d__Fungi|p__Ascomycota|c__Dothideomycetes|o__Pleosporales|f__Corynesporascaceae|g__Corynespora|s__Corynespora_cassiicola	0	0	0	0	0	0	0	0	0	0	0	0	0	0	0	0	0	0	0	0	0	0	0	0	0	0	0	0	0	0	0	0	0	0.16888	0.00374	0	0	0	0	0	0	0	0	0	0	0	0	0	0
d__Fungi|p__Ascomycota|c__Dothideomycetes|o__Pleosporales|f__Cucurbitariaceae	0	0	0	0	0	0	0	0	0	0	0	0	0	0	0	0	0	0	0	0	0	0	0	0	0	0	0	0	0	0	0	0	0	0	0	0	0	0	0	0	0	0	0	0	0	0	0	0	0
d__Fungi|p__Ascomycota|c__Dothideomycetes|o__Pleosporales|f__Cucurbitariaceae|g__Pyrenochaeta	0	0	0	0	0	0	0	0	0	0	0	0	0	0	0	0	0	0	0	0	0	0	0	0	0	0	0	0	0	0	0	0	0	0	0	0	0	0	0	0	0	0	0	0	0	0	0	0	0
d__Fungi|p__Ascomycota|c__Dothideomycetes|o__Pleosporales|f__Cucurbitariaceae|g__Pyrenochaeta|s__Pyrenochaeta_inflorescentiae	0	0	0	0	0	0	0	0	0	0	0	0	0	0	0	0	0	0	0	0	0	0	0	0	0	0	0	0	0	0	0	0	0	0	0	0	0	0	0	0	0	0	0	0	0	0	0	0	0
d__Fungi|p__Ascomycota|c__Dothideomycetes|o__Pleosporales|f__Didymellaceae	0.00362	2.37804	0	0	0.00512	0.00304	0	0	0	0	0	0	0.00401	0	0.00496	0.02675	4.93671	0	0.00628	0	0	0	0.02512	0.00947	0.04683	1.7599	0.00359	0	0.06468	0	0	0.00359	0.01413	0	0	0	0.25274	0	0	0.04699	0.00507	0	0.00989	0	0	0	0.03205	0.003	0.02714
d__Fungi|p__Ascomycota|c__Dothideomycetes|o__Pleosporales|f__Didymellaceae|g__Didymella	0	2.37804	0	0	0.00512	0	0	0	0	0	0	0	0.00401	0	0	0	0	0	0.00628	0	0	0	0.02512	0.00947	0.04683	1.7599	0.00359	0	0	0	0	0	0.01413	0	0	0	0	0	0	0.04699	0.00507	0	0.00989	0	0	0	0.03205	0	0.02714
d__Fungi|p__Ascomycota|c__Dothideomycetes|o__Pleosporales|f__Didymellaceae|g__Didymellaceae_unclassified	0	0	0	0	0	0	0	0	0	0	0	0	0	0	0	0	0	0	0	0	0	0	0	0	0	0	0	0	0.033	0	0	0	0	0	0	0	0	0	0	0	0	0	0	0	0	0	0	0	0
d__Fungi|p__Ascomycota|c__Dothideomycetes|o__Pleosporales|f__Didymellaceae|g__Didymellaceae_unclassified|s__Didymellaceae_unclassified	0	0	0	0	0	0	0	0	0	0	0	0	0	0	0	0	0	0	0	0	0	0	0	0	0	0	0	0	0.033	0	0	0	0	0	0	0	0	0	0	0	0	0	0	0	0	0	0	0	0
d__Fungi|p__Ascomycota|c__Dothideomycetes|o__Pleosporales|f__Didymellaceae|g__Didymella|s__Didymella_unclassified	0	0	0	0	0	0	0	0	0	0	0	0	0	0	0	0	0	0	0	0	0	0	0	0	0	0.01283	0	0	0	0	0	0	0	0	0	0	0	0	0	0	0	0	0	0	0	0	0.03205	0	0
d__Fungi|p__Ascomycota|c__Dothideomycetes|o__Pleosporales|f__Didymellaceae|g__Didymella|s__Phoma_bellidis	0	0	0	0	0.00512	0	0	0	0	0	0	0	0.00401	0	0	0	0	0	0.00628	0	0	0	0	0	0	0	0.00359	0	0	0	0	0	0.01413	0	0	0	0	0	0	0.04699	0.00507	0	0.00989	0	0	0	0	0	0.02714
d__Fungi|p__Ascomycota|c__Dothideomycetes|o__Pleosporales|f__Didymellaceae|g__Didymella|s__Phoma_exigua	0	2.37804	0	0	0	0	0	0	0	0	0	0	0	0	0	0	0	0	0	0	0	0	0.02512	0.00947	0.04683	1.74707	0	0	0	0	0	0	0	0	0	0	0	0	0	0	0	0	0	0	0	0	0	0	0
d__Fungi|p__Ascomycota|c__Dothideomycetes|o__Pleosporales|f__Didymellaceae|g__Leptosphaerulina	0.00362	0	0	0	0	0.00304	0	0	0	0	0	0	0	0	0.00496	0.02675	4.93671	0	0	0	0	0	0	0	0	0	0	0	0.03168	0	0	0.00359	0	0	0	0	0.25274	0	0	0	0	0	0	0	0	0	0	0.003	0
d__Fungi|p__Ascomycota|c__Dothideomycetes|o__Pleosporales|f__Didymellaceae|g__Leptosphaerulina|s__Leptosphaerulina_chartarum	0.00362	0	0	0	0	0.00304	0	0	0	0	0	0	0	0	0.00496	0.02675	4.93671	0	0	0	0	0	0	0	0	0	0	0	0.03168	0	0	0.00359	0	0	0	0	0.25274	0	0	0	0	0	0	0	0	0	0	0.003	0
d__Fungi|p__Ascomycota|c__Dothideomycetes|o__Pleosporales|f__Didymosphaeriaceae	0	0	0	0	0	0	0	0	0	0	0	0	0	0	0	0	0	0	0	0	0	0	0.00628	0	0	0	0	0	0	0	0	0	0	0	0	0	0	0	0	0	0	0	0	0	0	0	0	0	0
d__Fungi|p__Ascomycota|c__Dothideomycetes|o__Pleosporales|f__Didymosphaeriaceae|g__Deniquelata	0	0	0	0	0	0	0	0	0	0	0	0	0	0	0	0	0	0	0	0	0	0	0.00628	0	0	0	0	0	0	0	0	0	0	0	0	0	0	0	0	0	0	0	0	0	0	0	0	0	0
d__Fungi|p__Ascomycota|c__Dothideomycetes|o__Pleosporales|f__Didymosphaeriaceae|g__Deniquelata|s__Deniquelata_barringtoniae	0	0	0	0	0	0	0	0	0	0	0	0	0	0	0	0	0	0	0	0	0	0	0.00628	0	0	0	0	0	0	0	0	0	0	0	0	0	0	0	0	0	0	0	0	0	0	0	0	0	0
d__Fungi|p__Ascomycota|c__Dothideomycetes|o__Pleosporales|f__Lentitheciaceae	0	0	0	0	0	0	0	0	0	0	0	0	0	0	0	0	0	0	0	0	0	0	0	0	0	0	0	0	0	0	0	0	0	0	0	0	0	0	0	0	0	0	0	0	0	0	0	0	0
d__Fungi|p__Ascomycota|c__Dothideomycetes|o__Pleosporales|f__Lentitheciaceae|g__Pleurophoma	0	0	0	0	0	0	0	0	0	0	0	0	0	0	0	0	0	0	0	0	0	0	0	0	0	0	0	0	0	0	0	0	0	0	0	0	0	0	0	0	0	0	0	0	0	0	0	0	0
d__Fungi|p__Ascomycota|c__Dothideomycetes|o__Pleosporales|f__Lentitheciaceae|g__Pleurophoma|s__Pleurophoma_unclassified	0	0	0	0	0	0	0	0	0	0	0	0	0	0	0	0	0	0	0	0	0	0	0	0	0	0	0	0	0	0	0	0	0	0	0	0	0	0	0	0	0	0	0	0	0	0	0	0	0
d__Fungi|p__Ascomycota|c__Dothideomycetes|o__Pleosporales|f__Leptosphaeriaceae	0	0	0	0	0	0	0	0	0	0	0	0	0	0	0	0	0	0	0	0	0	0	0.00628	0	0.00863	0	0	0	0	0	0	0	0	0	0	0	0	0	0	0	0	0	0	0	0	0	0	0	0
d__Fungi|p__Ascomycota|c__Dothideomycetes|o__Pleosporales|f__Leptosphaeriaceae|g__Paraphoma	0	0	0	0	0	0	0	0	0	0	0	0	0	0	0	0	0	0	0	0	0	0	0.00628	0	0	0	0	0	0	0	0	0	0	0	0	0	0	0	0	0	0	0	0	0	0	0	0	0	0
d__Fungi|p__Ascomycota|c__Dothideomycetes|o__Pleosporales|f__Leptosphaeriaceae|g__Paraphoma|s__Paraphoma_chrysanthemicola	0	0	0	0	0	0	0	0	0	0	0	0	0	0	0	0	0	0	0	0	0	0	0.00628	0	0	0	0	0	0	0	0	0	0	0	0	0	0	0	0	0	0	0	0	0	0	0	0	0	0
d__Fungi|p__Ascomycota|c__Dothideomycetes|o__Pleosporales|f__Leptosphaeriaceae|g__Subplenodomus	0	0	0	0	0	0	0	0	0	0	0	0	0	0	0	0	0	0	0	0	0	0	0	0	0.00863	0	0	0	0	0	0	0	0	0	0	0	0	0	0	0	0	0	0	0	0	0	0	0	0
d__Fungi|p__Ascomycota|c__Dothideomycetes|o__Pleosporales|f__Leptosphaeriaceae|g__Subplenodomus|s__Subplenodomus_iridicola	0	0	0	0	0	0	0	0	0	0	0	0	0	0	0	0	0	0	0	0	0	0	0	0	0.00863	0	0	0	0	0	0	0	0	0	0	0	0	0	0	0	0	0	0	0	0	0	0	0	0
d__Fungi|p__Ascomycota|c__Dothideomycetes|o__Pleosporales|f__Lophiostomataceae	0	0	0	0	0	0	0	0	0	0	0	0	0	0	0	0	0	0	0	0	0	0	0	0	0.01725	0	0	0	0	0	0	0	0	0	0	0	0	0	0	0.24218	0	0	0	0	0	0	0.0222	0	0
d__Fungi|p__Ascomycota|c__Dothideomycetes|o__Pleosporales|f__Lophiostomataceae|g__Herpotrichia	0	0	0	0	0	0	0	0	0	0	0	0	0	0	0	0	0	0	0	0	0	0	0	0	0	0	0	0	0	0	0	0	0	0	0	0	0	0	0	0	0	0	0	0	0	0	0.01973	0	0
d__Fungi|p__Ascomycota|c__Dothideomycetes|o__Pleosporales|f__Lophiostomataceae|g__Herpotrichia|s__Herpotrichia_juniperi	0	0	0	0	0	0	0	0	0	0	0	0	0	0	0	0	0	0	0	0	0	0	0	0	0	0	0	0	0	0	0	0	0	0	0	0	0	0	0	0	0	0	0	0	0	0	0.01973	0	0
d__Fungi|p__Ascomycota|c__Dothideomycetes|o__Pleosporales|f__Lophiostomataceae|g__Lophiostomataceae_unclassified	0	0	0	0	0	0	0	0	0	0	0	0	0	0	0	0	0	0	0	0	0	0	0	0	0.01725	0	0	0	0	0	0	0	0	0	0	0	0	0	0	0.24218	0	0	0	0	0	0	0.00247	0	0
d__Fungi|p__Ascomycota|c__Dothideomycetes|o__Pleosporales|f__Lophiostomataceae|g__Lophiostomataceae_unclassified|s__Lophiostomataceae_unclassified	0	0	0	0	0	0	0	0	0	0	0	0	0	0	0	0	0	0	0	0	0	0	0	0	0.01725	0	0	0	0	0	0	0	0	0	0	0	0	0	0	0.24218	0	0	0	0	0	0	0.00247	0	0
d__Fungi|p__Ascomycota|c__Dothideomycetes|o__Pleosporales|f__Lophiostomataceae|g__Massarina	0	0	0	0	0	0	0	0	0	0	0	0	0	0	0	0	0	0	0	0	0	0	0	0	0	0	0	0	0	0	0	0	0	0	0	0	0	0	0	0	0	0	0	0	0	0	0	0	0
d__Fungi|p__Ascomycota|c__Dothideomycetes|o__Pleosporales|f__Lophiostomataceae|g__Massarina|s__Massarina_unclassified	0	0	0	0	0	0	0	0	0	0	0	0	0	0	0	0	0	0	0	0	0	0	0	0	0	0	0	0	0	0	0	0	0	0	0	0	0	0	0	0	0	0	0	0	0	0	0	0	0
d__Fungi|p__Ascomycota|c__Dothideomycetes|o__Pleosporales|f__Melanommataceae	0	0	0	0	0	0	0	0	0	0	0	0	0	0.00267	0	0	0	0	0	0.00244	0	18.8775	0	0	0	0	0	0	0	0	0	0	0	0	0	0	0	0	0	0	0	0	0	0	0	0	0.0037	0	0
d__Fungi|p__Ascomycota|c__Dothideomycetes|o__Pleosporales|f__Melanommataceae|g__Herpotrichia	0	0	0	0	0	0	0	0	0	0	0	0	0	0	0	0	0	0	0	0	0	0	0	0	0	0	0	0	0	0	0	0	0	0	0	0	0	0	0	0	0	0	0	0	0	0	0	0	0
d__Fungi|p__Ascomycota|c__Dothideomycetes|o__Pleosporales|f__Melanommataceae|g__Herpotrichia|s__Herpotrichia_unclassified	0	0	0	0	0	0	0	0	0	0	0	0	0	0	0	0	0	0	0	0	0	0	0	0	0	0	0	0	0	0	0	0	0	0	0	0	0	0	0	0	0	0	0	0	0	0	0	0	0
d__Fungi|p__Ascomycota|c__Dothideomycetes|o__Pleosporales|f__Melanommataceae|g__Melanommataceae_unclassified	0	0	0	0	0	0	0	0	0	0	0	0	0	0.00267	0	0	0	0	0	0.00244	0	18.8775	0	0	0	0	0	0	0	0	0	0	0	0	0	0	0	0	0	0	0	0	0	0	0	0	0.0037	0	0
d__Fungi|p__Ascomycota|c__Dothideomycetes|o__Pleosporales|f__Melanommataceae|g__Melanommataceae_unclassified|s__Melanommataceae_unclassified	0	0	0	0	0	0	0	0	0	0	0	0	0	0.00267	0	0	0	0	0	0.00244	0	18.8775	0	0	0	0	0	0	0	0	0	0	0	0	0	0	0	0	0	0	0	0	0	0	0	0	0.0037	0	0
d__Fungi|p__Ascomycota|c__Dothideomycetes|o__Pleosporales|f__Montagnulaceae	0	0	0.00259	0.00852	24.2186	0	0.00511	0	0	0	0	0	0.01204	0.00267	0	0	0	0	0	0	0	0	0	0	0	0	0	0	0	0	0	0	0	0	0	0	0	0	0.00554	0	0	0	0	0	3.53997	0	0	0	0
d__Fungi|p__Ascomycota|c__Dothideomycetes|o__Pleosporales|f__Montagnulaceae|g__Microsphaeropsis	0	0	0	0	0	0	0.00511	0	0	0	0	0	0	0.00267	0	0	0	0	0	0	0	0	0	0	0	0	0	0	0	0	0	0	0	0	0	0	0	0	0	0	0	0	0	0	0	0	0	0	0
d__Fungi|p__Ascomycota|c__Dothideomycetes|o__Pleosporales|f__Montagnulaceae|g__Microsphaeropsis|s__Microsphaeropsis_arundinis	0	0	0	0	0	0	0.00511	0	0	0	0	0	0	0.00267	0	0	0	0	0	0	0	0	0	0	0	0	0	0	0	0	0	0	0	0	0	0	0	0	0	0	0	0	0	0	0	0	0	0	0
d__Fungi|p__Ascomycota|c__Dothideomycetes|o__Pleosporales|f__Montagnulaceae|g__Paraconiothyrium	0	0	0.00259	0.00852	24.2186	0	0	0	0	0	0	0	0.01204	0	0	0	0	0	0	0	0	0	0	0	0	0	0	0	0	0	0	0	0	0	0	0	0	0	0.00554	0	0	0	0	0	3.53997	0	0	0	0
d__Fungi|p__Ascomycota|c__Dothideomycetes|o__Pleosporales|f__Montagnulaceae|g__Paraconiothyrium|s__Paraconiothyrium_sporulosum	0	0	0.00259	0.00852	24.2186	0	0	0	0	0	0	0	0.01204	0	0	0	0	0	0	0	0	0	0	0	0	0	0	0	0	0	0	0	0	0	0	0	0	0	0.00554	0	0	0	0	0	3.53997	0	0	0	0
d__Fungi|p__Ascomycota|c__Dothideomycetes|o__Pleosporales|f__Morosphaeriaceae	0	0	0	0	0	0	0	0	0	0	0	0	0	0	0	0	0	0	0	0	0	0	0	0	0	0	0	0	0	0	0	0	0	0	0	0	0	0	0	0	0	0	0	0	0	0	0.00247	0	0
d__Fungi|p__Ascomycota|c__Dothideomycetes|o__Pleosporales|f__Morosphaeriaceae|g__Aquilomyces	0	0	0	0	0	0	0	0	0	0	0	0	0	0	0	0	0	0	0	0	0	0	0	0	0	0	0	0	0	0	0	0	0	0	0	0	0	0	0	0	0	0	0	0	0	0	0.00247	0	0
d__Fungi|p__Ascomycota|c__Dothideomycetes|o__Pleosporales|f__Morosphaeriaceae|g__Aquilomyces|s__Aquilomyces_patris	0	0	0	0	0	0	0	0	0	0	0	0	0	0	0	0	0	0	0	0	0	0	0	0	0	0	0	0	0	0	0	0	0	0	0	0	0	0	0	0	0	0	0	0	0	0	0.00247	0	0
d__Fungi|p__Ascomycota|c__Dothideomycetes|o__Pleosporales|f__Periconiaceae	0	0	0	0	0	0	0	0	0	0	0	0	0	0	0	0	0	0	0	0	0	0	1.09657	0	0	0.00641	0	0	0	0	0	0	0	0.00504	0	0	0	0	0	0	0	0	0	0	0	0	0	0	0
d__Fungi|p__Ascomycota|c__Dothideomycetes|o__Pleosporales|f__Periconiaceae|g__Periconia	0	0	0	0	0	0	0	0	0	0	0	0	0	0	0	0	0	0	0	0	0	0	1.09657	0	0	0.00641	0	0	0	0	0	0	0	0.00504	0	0	0	0	0	0	0	0	0	0	0	0	0	0	0
d__Fungi|p__Ascomycota|c__Dothideomycetes|o__Pleosporales|f__Periconiaceae|g__Periconia|s__Periconia_byssoides	0	0	0	0	0	0	0	0	0	0	0	0	0	0	0	0	0	0	0	0	0	0	1.09657	0	0	0.00641	0	0	0	0	0	0	0	0	0	0	0	0	0	0	0	0	0	0	0	0	0	0	0
d__Fungi|p__Ascomycota|c__Dothideomycetes|o__Pleosporales|f__Periconiaceae|g__Periconia|s__Periconia_echinochloae	0	0	0	0	0	0	0	0	0	0	0	0	0	0	0	0	0	0	0	0	0	0	0	0	0	0	0	0	0	0	0	0	0	0.00504	0	0	0	0	0	0	0	0	0	0	0	0	0	0	0
d__Fungi|p__Ascomycota|c__Dothideomycetes|o__Pleosporales|f__Phaeosphaeriaceae	0.04954	0	0	0	0.00256	0	0.00639	0	0	0	0	1.33937	0.00268	0	0	0.11063	0	0	0	0	0	0	0.00628	0	0	0.01283	0.00479	0	7.23714	0.00533	0	0.01076	0	0.71333	0.01497	0	0.02741	0	0	1.12174	0.07482	0	0.00989	0	0	0	0	0	0.71993
d__Fungi|p__Ascomycota|c__Dothideomycetes|o__Pleosporales|f__Phaeosphaeriaceae|g__Leptospora	0	0	0	0	0	0	0	0	0	0	0	0	0	0	0	0	0	0	0	0	0	0	0	0	0	0.00385	0	0	0	0	0	0	0	0	0	0	0	0	0	0	0	0	0	0	0	0	0	0	0
d__Fungi|p__Ascomycota|c__Dothideomycetes|o__Pleosporales|f__Phaeosphaeriaceae|g__Leptospora|s__Leptospora_unclassified	0	0	0	0	0	0	0	0	0	0	0	0	0	0	0	0	0	0	0	0	0	0	0	0	0	0.00385	0	0	0	0	0	0	0	0	0	0	0	0	0	0	0	0	0	0	0	0	0	0	0
d__Fungi|p__Ascomycota|c__Dothideomycetes|o__Pleosporales|f__Phaeosphaeriaceae|g__Ophiosphaerella	0	0	0	0	0	0	0	0	0	0	0	0	0	0	0	0	0	0	0	0	0	0	0	0	0	0	0	0	0	0	0	0	0	0	0	0	0	0	0	0	0	0	0	0	0	0	0	0	0
d__Fungi|p__Ascomycota|c__Dothideomycetes|o__Pleosporales|f__Phaeosphaeriaceae|g__Ophiosphaerella|s__Ophiosphaerella_agrostis	0	0	0	0	0	0	0	0	0	0	0	0	0	0	0	0	0	0	0	0	0	0	0	0	0	0	0	0	0	0	0	0	0	0	0	0	0	0	0	0	0	0	0	0	0	0	0	0	0
d__Fungi|p__Ascomycota|c__Dothideomycetes|o__Pleosporales|f__Phaeosphaeriaceae|g__Phaeosphaeria	0	0	0	0	0.00256	0	0	0	0	0	0	1.33937	0	0	0	0	0	0	0	0	0	0	0.00251	0	0	0.00898	0.00479	0	0	0.00533	0	0	0	0	0	0	0	0	0	1.12174	0	0	0	0	0	0	0	0	0
d__Fungi|p__Ascomycota|c__Dothideomycetes|o__Pleosporales|f__Phaeosphaeriaceae|g__Phaeosphaeriaceae_unclassified	0	0	0	0	0	0	0	0	0	0	0	0	0	0	0	0	0	0	0	0	0	0	0	0	0	0	0	0	0	0	0	0	0	0	0	0	0	0	0	0	0.0596	0	0	0	0	0	0	0	0
d__Fungi|p__Ascomycota|c__Dothideomycetes|o__Pleosporales|f__Phaeosphaeriaceae|g__Phaeosphaeriaceae_unclassified|s__Phaeosphaeriaceae_unclassified	0	0	0	0	0	0	0	0	0	0	0	0	0	0	0	0	0	0	0	0	0	0	0	0	0	0	0	0	0	0	0	0	0	0	0	0	0	0	0	0	0.0596	0	0	0	0	0	0	0	0
d__Fungi|p__Ascomycota|c__Dothideomycetes|o__Pleosporales|f__Phaeosphaeriaceae|g__Phaeosphaeria|s__Phaeosphaeria_herpotrichoides	0	0	0	0	0	0	0	0	0	0	0	0	0	0	0	0	0	0	0	0	0	0	0	0	0	0	0	0	0	0	0	0	0	0	0	0	0	0	0	1.12174	0	0	0	0	0	0	0	0	0
d__Fungi|p__Ascomycota|c__Dothideomycetes|o__Pleosporales|f__Phaeosphaeriaceae|g__Phaeosphaeria|s__Phaeosphaeria_sp_1_MM_2012	0	0	0	0	0	0	0	0	0	0	0	0	0	0	0	0	0	0	0	0	0	0	0	0	0	0	0.00479	0	0	0	0	0	0	0	0	0	0	0	0	0	0	0	0	0	0	0	0	0	0
d__Fungi|p__Ascomycota|c__Dothideomycetes|o__Pleosporales|f__Phaeosphaeriaceae|g__Phaeosphaeria|s__Phaeosphaeria_unclassified	0	0	0	0	0.00256	0	0	0	0	0	0	1.33937	0	0	0	0	0	0	0	0	0	0	0.00251	0	0	0.00898	0	0	0	0.00533	0	0	0	0	0	0	0	0	0	0	0	0	0	0	0	0	0	0	0
d__Fungi|p__Ascomycota|c__Dothideomycetes|o__Pleosporales|f__Phaeosphaeriaceae|g__Phaeosphaeriopsis	0	0	0	0	0	0	0.00639	0	0	0	0	0	0	0	0	0	0	0	0	0	0	0	0	0	0	0	0	0	0	0	0	0.00478	0	0.71333	0	0	0	0	0	0	0	0	0	0	0	0	0	0	0
d__Fungi|p__Ascomycota|c__Dothideomycetes|o__Pleosporales|f__Phaeosphaeriaceae|g__Phaeosphaeriopsis|s__Phaeoseptoria_musae	0	0	0	0	0	0	0.00639	0	0	0	0	0	0	0	0	0	0	0	0	0	0	0	0	0	0	0	0	0	0	0	0	0.00478	0	0.71333	0	0	0	0	0	0	0	0	0	0	0	0	0	0	0
d__Fungi|p__Ascomycota|c__Dothideomycetes|o__Pleosporales|f__Phaeosphaeriaceae|g__Setophaeosphaeria	0	0	0	0	0	0	0	0	0	0	0	0	0	0	0	0	0	0	0	0	0	0	0	0	0	0	0	0	0	0	0	0	0	0	0	0	0	0	0	0	0	0	0	0	0	0	0	0	0
d__Fungi|p__Ascomycota|c__Dothideomycetes|o__Pleosporales|f__Phaeosphaeriaceae|g__Setophaeosphaeria|s__Setophaeosphaeria_badalingensis	0	0	0	0	0	0	0	0	0	0	0	0	0	0	0	0	0	0	0	0	0	0	0	0	0	0	0	0	0	0	0	0	0	0	0	0	0	0	0	0	0	0	0	0	0	0	0	0	0
d__Fungi|p__Ascomycota|c__Dothideomycetes|o__Pleosporales|f__Phaeosphaeriaceae|g__Setophoma	0.04954	0	0	0	0	0	0	0	0	0	0	0	0.00268	0	0	0.11063	0	0	0	0	0	0	0.00377	0	0	0	0	0	7.23714	0	0	0.00598	0	0	0.01497	0	0.02741	0	0	0	0.01522	0	0.00989	0	0	0	0	0	0.71993
d__Fungi|p__Ascomycota|c__Dothideomycetes|o__Pleosporales|f__Phaeosphaeriaceae|g__Setophoma|s__Setophoma_chromolaenae	0.04954	0	0	0	0	0	0	0	0	0	0	0	0	0	0	0.11063	0	0	0	0	0	0	0.00377	0	0	0	0	0	7.23714	0	0	0.00598	0	0	0	0	0.02741	0	0	0	0	0	0	0	0	0	0	0	0
d__Fungi|p__Ascomycota|c__Dothideomycetes|o__Pleosporales|f__Phaeosphaeriaceae|g__Setophoma|s__Setophoma_unclassified	0	0	0	0	0	0	0	0	0	0	0	0	0.00268	0	0	0	0	0	0	0	0	0	0	0	0	0	0	0	0	0	0	0	0	0	0.01497	0	0	0	0	0	0.01522	0	0.00989	0	0	0	0	0	0.71993
d__Fungi|p__Ascomycota|c__Dothideomycetes|o__Pleosporales|f__Pleosporaceae	0.05679	0.38715	84.4546	0.16678	10.2074	0.35095	66.897	0.00629	9.5285	0.81965	72.8414	47.2946	0.0281	88.1834	34.6912	0.20911	0.00496	0	13.3275	3.34267	0	0.05138	9.45837	68.118	0.03697	0.31812	0.07544	96.5194	11.5361	0.04132	0.01574	0.01196	7.97046	0.50412	0.10982	0.01234	25.3041	15.517	0.01522	32.0883	30.0781	0.23345	4.70405	0.11606	0.04486	0.03195	0.02837	0.02252	0.13999
d__Fungi|p__Ascomycota|c__Dothideomycetes|o__Pleosporales|f__Pleosporaceae|g__Alternaria	0.05679	0.38715	84.4546	0.16678	10.2074	0.35095	66.8906	0.00629	9.5285	0.81965	72.8414	47.2946	0.0281	88.1834	34.6912	0.20911	0.00496	0	13.3275	3.34267	0	0.05138	9.4546	68.118	0.02588	0.31042	0.07544	96.5194	11.5361	0.04132	0.01574	0.01196	7.97046	0.50412	0.10982	0.01234	25.3041	12.5647	0.01522	32.0883	30.0781	0.23345	4.62866	0.11606	0.04486	0.03195	0.0111	0.02252	0.13999
d__Fungi|p__Ascomycota|c__Dothideomycetes|o__Pleosporales|f__Pleosporaceae|g__Alternaria|s__Alternaria_alternata	0.05679	0.38715	84.4274	0.16678	10.2074	0.35095	66.8689	0.00629	9.48473	0.81965	72.8342	47.2856	0.0281	88.1781	34.6825	0.20546	0.00496	0	13.3275	3.34267	0	0.05138	9.4546	68.0967	0.02588	0.31042	0.07544	96.5116	11.4635	0.04132	0.01574	0.01196	7.97046	0.50412	0.10982	0.01234	25.3041	12.5595	0.01522	32.0883	30.073	0.23345	4.62866	0.11606	0.04486	0.03195	0.0111	0.02252	0.13999
d__Fungi|p__Ascomycota|c__Dothideomycetes|o__Pleosporales|f__Pleosporaceae|g__Alternaria|s__Alternaria_longissima	0	0	0	0	0	0	0.00511	0	0	0	0	0	0	0	0	0	0	0	0	0	0	0	0	0	0	0	0	0	0	0	0	0	0	0	0	0	0	0	0	0	0	0	0	0	0	0	0	0	0
d__Fungi|p__Ascomycota|c__Dothideomycetes|o__Pleosporales|f__Pleosporaceae|g__Alternaria|s__Alternaria_padwickii	0	0	0	0	0	0	0	0	0	0	0	0	0	0	0	0.00365	0	0	0	0	0	0	0	0	0	0	0	0	0.0726	0	0	0	0	0	0	0	0	0	0	0	0	0	0	0	0	0	0	0	0
d__Fungi|p__Ascomycota|c__Dothideomycetes|o__Pleosporales|f__Pleosporaceae|g__Alternaria|s__Alternaria_unclassified	0	0	0.02724	0	0	0	0.0166	0	0.04377	0	0.00718	0.00908	0	0.00534	0.00869	0	0	0	0	0	0	0	0	0.0213	0	0	0	0.00778	0	0	0	0	0	0	0	0	0	0.0052	0	0	0.00507	0	0	0	0	0	0	0	0
d__Fungi|p__Ascomycota|c__Dothideomycetes|o__Pleosporales|f__Pleosporaceae|g__Bipolaris	0	0	0	0	0	0	0	0	0	0	0	0	0	0	0	0	0	0	0	0	0	0	0	0	0	0.00257	0	0	0	0	0	0	0	0	0	0	0	0	0	0	0	0	0	0	0	0	0	0	0
d__Fungi|p__Ascomycota|c__Dothideomycetes|o__Pleosporales|f__Pleosporaceae|g__Bipolaris|s__Bipolaris_sorghicola	0	0	0	0	0	0	0	0	0	0	0	0	0	0	0	0	0	0	0	0	0	0	0	0	0	0.00257	0	0	0	0	0	0	0	0	0	0	0	0	0	0	0	0	0	0	0	0	0	0	0
d__Fungi|p__Ascomycota|c__Dothideomycetes|o__Pleosporales|f__Pleosporaceae|g__Cochliobolus	0	0	0	0	0	0	0.00639	0	0	0	0	0	0	0	0	0	0	0	0	0	0	0	0.00377	0	0.01109	0.00513	0	0	0	0	0	0	0	0	0	0	0	0	0	0	0	0	0	0	0	0	0.00617	0	0
d__Fungi|p__Ascomycota|c__Dothideomycetes|o__Pleosporales|f__Pleosporaceae|g__Cochliobolus|s__Bipolaris_spicifera	0	0	0	0	0	0	0	0	0	0	0	0	0	0	0	0	0	0	0	0	0	0	0	0	0	0	0	0	0	0	0	0	0	0	0	0	0	0	0	0	0	0	0	0	0	0	0.0037	0	0
d__Fungi|p__Ascomycota|c__Dothideomycetes|o__Pleosporales|f__Pleosporaceae|g__Cochliobolus|s__Cochliobolus_geniculatus	0	0	0	0	0	0	0.00639	0	0	0	0	0	0	0	0	0	0	0	0	0	0	0	0	0	0	0	0	0	0	0	0	0	0	0	0	0	0	0	0	0	0	0	0	0	0	0	0	0	0
d__Fungi|p__Ascomycota|c__Dothideomycetes|o__Pleosporales|f__Pleosporaceae|g__Cochliobolus|s__Cochliobolus_sativus	0	0	0	0	0	0	0	0	0	0	0	0	0	0	0	0	0	0	0	0	0	0	0.00377	0	0.01109	0	0	0	0	0	0	0	0	0	0	0	0	0	0	0	0	0	0	0	0	0	0.00247	0	0
d__Fungi|p__Ascomycota|c__Dothideomycetes|o__Pleosporales|f__Pleosporaceae|g__Cochliobolus|s__Cochliobolus_unclassified	0	0	0	0	0	0	0	0	0	0	0	0	0	0	0	0	0	0	0	0	0	0	0	0	0	0.00513	0	0	0	0	0	0	0	0	0	0	0	0	0	0	0	0	0	0	0	0	0	0	0
d__Fungi|p__Ascomycota|c__Dothideomycetes|o__Pleosporales|f__Pleosporaceae|g__Dendryphion	0	0	0	0	0	0	0	0	0	0	0	0	0	0	0	0	0	0	0	0	0	0	0	0	0	0	0	0	0	0	0	0	0	0	0	0	0	0	0	0	0	0	0	0	0	0	0	0	0
d__Fungi|p__Ascomycota|c__Dothideomycetes|o__Pleosporales|f__Pleosporaceae|g__Dendryphion|s__Dendryphion_nanum	0	0	0	0	0	0	0	0	0	0	0	0	0	0	0	0	0	0	0	0	0	0	0	0	0	0	0	0	0	0	0	0	0	0	0	0	0	0	0	0	0	0	0	0	0	0	0	0	0
d__Fungi|p__Ascomycota|c__Dothideomycetes|o__Pleosporales|f__Pleosporaceae|g__Edenia	0	0	0	0	0	0	0	0	0	0	0	0	0	0	0	0	0	0	0	0	0	0	0	0	0	0	0	0	0	0	0	0	0	0	0	0	0	0	0	0	0	0	0	0	0	0	0.0111	0	0
d__Fungi|p__Ascomycota|c__Dothideomycetes|o__Pleosporales|f__Pleosporaceae|g__Edenia|s__Edenia_gomezpompae	0	0	0	0	0	0	0	0	0	0	0	0	0	0	0	0	0	0	0	0	0	0	0	0	0	0	0	0	0	0	0	0	0	0	0	0	0	0	0	0	0	0	0	0	0	0	0.0111	0	0
d__Fungi|p__Ascomycota|c__Dothideomycetes|o__Pleosporales|f__Pleosporaceae|g__Exserohilum	0	0	0	0	0	0	0	0	0	0	0	0	0	0	0	0	0	0	0	0	0	0	0	0	0	0	0	0	0	0	0	0	0	0	0	0	0	2.95227	0	0	0	0	0	0	0	0	0	0	0
d__Fungi|p__Ascomycota|c__Dothideomycetes|o__Pleosporales|f__Pleosporaceae|g__Exserohilum|s__Exserohilum_fusiforme	0	0	0	0	0	0	0	0	0	0	0	0	0	0	0	0	0	0	0	0	0	0	0	0	0	0	0	0	0	0	0	0	0	0	0	0	0	2.95227	0	0	0	0	0	0	0	0	0	0	0
d__Fungi|p__Ascomycota|c__Dothideomycetes|o__Pleosporales|f__Pleosporaceae|g__Pyrenophora	0	0	0	0	0	0	0	0	0	0	0	0	0	0	0	0	0	0	0	0	0	0	0	0	0	0	0	0	0	0	0	0	0	0	0	0	0	0	0	0	0	0	0.07539	0	0	0	0	0	0
d__Fungi|p__Ascomycota|c__Dothideomycetes|o__Pleosporales|f__Pleosporaceae|g__Pyrenophora|s__Pyrenophora_avenae	0	0	0	0	0	0	0	0	0	0	0	0	0	0	0	0	0	0	0	0	0	0	0	0	0	0	0	0	0	0	0	0	0	0	0	0	0	0	0	0	0	0	0.07539	0	0	0	0	0	0
d__Fungi|p__Ascomycota|c__Dothideomycetes|o__Pleosporales|f__Pleosporales_Incertae_sedis	0	0	0	0	0	0	0	0	0	0	0	0	0	0	0	0	0	0	0	0	0	0	0	0	0	0	0	0	0	0	0	0	0	0	0.00998	0	0	0	0	0	0	0.00248	0.85405	0	1.66594	0	0.05302	0	0
d__Fungi|p__Ascomycota|c__Dothideomycetes|o__Pleosporales|f__Pleosporales_Incertae_sedis|g__Phoma	0	0	0	0	0	0	0	0	0	0	0	0	0	0	0	0	0	0	0	0	0	0	0	0	0	0	0	0	0	0	0	0	0	0	0	0	0	0	0	0	0	0	0	0	0	0	0.05302	0	0
d__Fungi|p__Ascomycota|c__Dothideomycetes|o__Pleosporales|f__Pleosporales_Incertae_sedis|g__Phoma|s__Phoma_radicina	0	0	0	0	0	0	0	0	0	0	0	0	0	0	0	0	0	0	0	0	0	0	0	0	0	0	0	0	0	0	0	0	0	0	0	0	0	0	0	0	0	0	0	0	0	0	0.0111	0	0
d__Fungi|p__Ascomycota|c__Dothideomycetes|o__Pleosporales|f__Pleosporales_Incertae_sedis|g__Phoma|s__Phoma_unclassified	0	0	0	0	0	0	0	0	0	0	0	0	0	0	0	0	0	0	0	0	0	0	0	0	0	0	0	0	0	0	0	0	0	0	0	0	0	0	0	0	0	0	0	0	0	0	0.04192	0	0
d__Fungi|p__Ascomycota|c__Dothideomycetes|o__Pleosporales|f__Pleosporales_Incertae_sedis|g__Pleosporales_Incertae_sedis_unclassified	0	0	0	0	0	0	0	0	0	0	0	0	0	0	0	0	0	0	0	0	0	0	0	0	0	0	0	0	0	0	0	0	0	0	0.00998	0	0	0	0	0	0	0.00248	0.85405	0	0.0486	0	0	0	0
d__Fungi|p__Ascomycota|c__Dothideomycetes|o__Pleosporales|f__Pleosporales_Incertae_sedis|g__Pleosporales_Incertae_sedis_unclassified|s__Pleosporales_Incertae_sedis_unclassified	0	0	0	0	0	0	0	0	0	0	0	0	0	0	0	0	0	0	0	0	0	0	0	0	0	0	0	0	0	0	0	0	0	0	0.00998	0	0	0	0	0	0	0.00248	0.85405	0	0.0486	0	0	0	0
d__Fungi|p__Ascomycota|c__Dothideomycetes|o__Pleosporales|f__Pleosporales_Incertae_sedis|g__Pyrenochaeta	0	0	0	0	0	0	0	0	0	0	0	0	0	0	0	0	0	0	0	0	0	0	0	0	0	0	0	0	0	0	0	0	0	0	0	0	0	0	0	0	0	0	0	0	1.61734	0	0	0	0
d__Fungi|p__Ascomycota|c__Dothideomycetes|o__Pleosporales|f__Pleosporales_Incertae_sedis|g__Pyrenochaeta|s__Pyrenochaeta_unclassified	0	0	0	0	0	0	0	0	0	0	0	0	0	0	0	0	0	0	0	0	0	0	0	0	0	0	0	0	0	0	0	0	0	0	0	0	0	0	0	0	0	0	0	0	1.61734	0	0	0	0
d__Fungi|p__Ascomycota|c__Dothideomycetes|o__Pleosporales|f__Pleosporales_unclassified	0.00242	0	0	0	0	0	0.01405	0	0	0	0	0	0	0.004	0.00372	0.00243	0	0	0	0.00487	0	13.0846	0.00628	0.00237	0.00863	0.01026	0	0	0.02772	0	0	0.00478	0	0.01764	0.00624	0	4.84615	0	0.03737	0	0	0.09313	0	0.00247	1.77684	0	0.00247	0	0
d__Fungi|p__Ascomycota|c__Dothideomycetes|o__Pleosporales|f__Pleosporales_unclassified|g__Pleosporales_unclassified	0.00242	0	0	0	0	0	0.01405	0	0	0	0	0	0	0.004	0.00372	0.00243	0	0	0	0.00487	0	13.0846	0.00628	0.00237	0.00863	0.01026	0	0	0.02772	0	0	0.00478	0	0.01764	0.00624	0	4.84615	0	0.03737	0	0	0.09313	0	0.00247	1.77684	0	0.00247	0	0
d__Fungi|p__Ascomycota|c__Dothideomycetes|o__Pleosporales|f__Pleosporales_unclassified|g__Pleosporales_unclassified|s__Pleosporales_unclassified	0.00242	0	0	0	0	0	0.01405	0	0	0	0	0	0	0.004	0.00372	0.00243	0	0	0	0.00487	0	13.0846	0.00628	0.00237	0.00863	0.01026	0	0	0.02772	0	0	0.00478	0	0.01764	0.00624	0	4.84615	0	0.03737	0	0	0.09313	0	0.00247	1.77684	0	0.00247	0	0
d__Fungi|p__Ascomycota|c__Dothideomycetes|o__Pleosporales|f__Sporormiaceae	0	0	0.00649	0.0073	0.00895	0	0.00894	0	0	21.7739	0	0.01038	0.00803	0.00534	2.34137	0	0	0	0.01758	0.01582	0	0.01908	0	0	0	0	0.01556	0.00908	0	0.01199	0.00484	0	0.00771	0.0063	0.00749	0	0	0.0026	0	0	0.01395	0.00373	0	0.00617	0	0	0.00247	0	0.01
d__Fungi|p__Ascomycota|c__Dothideomycetes|o__Pleosporales|f__Sporormiaceae|g__Preussia	0	0	0.00649	0.0073	0.00895	0	0.00894	0	0	21.7739	0	0.01038	0.00803	0.00534	2.34137	0	0	0	0.01758	0.01582	0	0.01908	0	0	0	0	0.01556	0.00908	0	0.01199	0.00484	0	0.00771	0.0063	0.00749	0	0	0.0026	0	0	0.01395	0.00373	0	0.00617	0	0	0.00247	0	0.01
d__Fungi|p__Ascomycota|c__Dothideomycetes|o__Pleosporales|f__Sporormiaceae|g__Preussia|s__Preussia_aemulans	0	0	0	0	0	0	0	0	0	14.7241	0	0	0	0	2.34137	0	0	0	0	0	0	0	0	0	0	0	0	0	0	0	0	0	0	0	0	0	0	0	0	0	0	0	0	0	0	0	0	0	0
d__Fungi|p__Ascomycota|c__Dothideomycetes|o__Pleosporales|f__Sporormiaceae|g__Preussia|s__Preussia_minima	0	0	0	0	0	0	0	0	0	0	0	0	0	0	0	0	0	0	0	0	0	0	0	0	0	0	0	0	0	0	0	0	0	0	0	0	0	0	0	0	0	0	0	0	0	0	0.00247	0	0
d__Fungi|p__Ascomycota|c__Dothideomycetes|o__Pleosporales|f__Sporormiaceae|g__Preussia|s__Preussia_pilosella	0	0	0	0	0	0	0	0	0	0	0	0	0	0	0	0	0	0	0	0.00365	0	0	0	0	0	0	0	0	0	0	0	0	0.00257	0.00378	0.00499	0	0	0	0	0	0.00254	0	0	0	0	0	0	0	0
d__Fungi|p__Ascomycota|c__Dothideomycetes|o__Pleosporales|f__Sporormiaceae|g__Preussia|s__Preussia_terricola	0	0	0.00649	0.0073	0.00895	0	0.00894	0	0	0	0	0.01038	0.00535	0.00534	0	0	0	0	0.01758	0.00852	0	0.01908	0	0	0	0	0.00718	0.00389	0	0.00533	0	0	0	0.00252	0	0	0	0.0026	0	0	0.00507	0	0	0	0	0	0	0	0.00429
d__Fungi|p__Ascomycota|c__Dothideomycetes|o__Pleosporales|f__Sporormiaceae|g__Preussia|s__Preussia_unclassified	0	0	0	0	0	0	0	0	0	7.04975	0	0	0.00268	0	0	0	0	0	0	0.00365	0	0	0	0	0	0	0.00838	0.00519	0	0.00666	0.00484	0	0.00514	0	0.0025	0	0	0	0	0	0.00634	0.00373	0	0.00617	0	0	0	0	0.00571
d__Fungi|p__Ascomycota|c__Dothideomycetes|o__Pleosporales|f__Teichosporaceae	0	0	0	0	0	0	0	0	0	0	0	0	0	0	0	0	0	0	0	0	0	0	0	0	0	0	0	0	0	0	0	0	0	0	0	0	0	0	0	0	0	0	0	0	0	0	0	0	0
d__Fungi|p__Ascomycota|c__Dothideomycetes|o__Pleosporales|f__Teichosporaceae|g__Teichospora	0	0	0	0	0	0	0	0	0	0	0	0	0	0	0	0	0	0	0	0	0	0	0	0	0	0	0	0	0	0	0	0	0	0	0	0	0	0	0	0	0	0	0	0	0	0	0	0	0
d__Fungi|p__Ascomycota|c__Dothideomycetes|o__Pleosporales|f__Teichosporaceae|g__Teichospora|s__Teichospora_mariae	0	0	0	0	0	0	0	0	0	0	0	0	0	0	0	0	0	0	0	0	0	0	0	0	0	0	0	0	0	0	0	0	0	0	0	0	0	0	0	0	0	0	0	0	0	0	0	0	0
d__Fungi|p__Ascomycota|c__Dothideomycetes|o__Pleosporales|f__Thyridariaceae	0	0	0	0	0	0	0	0	0	0	0	0	0	0	0	0	0	0	0	0	0	0	0	0	0	0	0	0	0	0	0	0	0	1.5968	0	0	0	0	0	0	0	0	0	0	0	0	0.0037	0	0
d__Fungi|p__Ascomycota|c__Dothideomycetes|o__Pleosporales|f__Thyridariaceae|g__Roussoella	0	0	0	0	0	0	0	0	0	0	0	0	0	0	0	0	0	0	0	0	0	0	0	0	0	0	0	0	0	0	0	0	0	1.5968	0	0	0	0	0	0	0	0	0	0	0	0	0.0037	0	0
d__Fungi|p__Ascomycota|c__Dothideomycetes|o__Pleosporales|f__Thyridariaceae|g__Roussoella|s__Roussoella_solani	0	0	0	0	0	0	0	0	0	0	0	0	0	0	0	0	0	0	0	0	0	0	0	0	0	0	0	0	0	0	0	0	0	1.5968	0	0	0	0	0	0	0	0	0	0	0	0	0.0037	0	0
d__Fungi|p__Ascomycota|c__Dothideomycetes|o__Pleosporales|f__Tubeufiaceae	0	0	0	0	0	0	0	0	0	0	0	0	0	0	0	0	0	0	0	0	0	0	0	0	0	0	0	0	0	0	0	0	0.00257	3.63093	0	0	0	0	0	0	0	0	0	0	0	0	0	0	0
d__Fungi|p__Ascomycota|c__Dothideomycetes|o__Pleosporales|f__Tubeufiaceae|g__Tubeufia	0	0	0	0	0	0	0	0	0	0	0	0	0	0	0	0	0	0	0	0	0	0	0	0	0	0	0	0	0	0	0	0	0.00257	3.63093	0	0	0	0	0	0	0	0	0	0	0	0	0	0	0
d__Fungi|p__Ascomycota|c__Dothideomycetes|o__Pleosporales|f__Tubeufiaceae|g__Tubeufia|s__Tubeufia_cerea	0	0	0	0	0	0	0	0	0	0	0	0	0	0	0	0	0	0	0	0	0	0	0	0	0	0	0	0	0	0	0	0	0.00257	3.63093	0	0	0	0	0	0	0	0	0	0	0	0	0	0	0
d__Fungi|p__Ascomycota|c__Dothideomycetes|o__Tubeufiales	0	0	0	0	0	0	0	0	0	0	0	0	0	0.02135	0	0	0	0	0	0	0	0	0	0	0	0	0	0	0	0	0	0	0	0	0	0	0	0	0	0	0	0	0	0	0	0	0	0	0
d__Fungi|p__Ascomycota|c__Dothideomycetes|o__Tubeufiales|f__Tubeufiaceae	0	0	0	0	0	0	0	0	0	0	0	0	0	0	0	0	0	0	0	0	0	0	0	0	0	0	0	0	0	0	0	0	0	0	0	0	0	0	0	0	0	0	0	0	0	0	0	0	0
d__Fungi|p__Ascomycota|c__Dothideomycetes|o__Tubeufiales|f__Tubeufiaceae|g__Helicoma	0	0	0	0	0	0	0	0	0	0	0	0	0	0	0	0	0	0	0	0	0	0	0	0	0	0	0	0	0	0	0	0	0	0	0	0	0	0	0	0	0	0	0	0	0	0	0	0	0
d__Fungi|p__Ascomycota|c__Dothideomycetes|o__Tubeufiales|f__Tubeufiaceae|g__Helicoma|s__Helicoma_isiola	0	0	0	0	0	0	0	0	0	0	0	0	0	0	0	0	0	0	0	0	0	0	0	0	0	0	0	0	0	0	0	0	0	0	0	0	0	0	0	0	0	0	0	0	0	0	0	0	0
d__Fungi|p__Ascomycota|c__Dothideomycetes|o__Tubeufiales|f__Tubeufiaceae|g__Tubeufiaceae_unclassified	0	0	0	0	0	0	0	0	0	0	0	0	0	0	0	0	0	0	0	0	0	0	0	0	0	0	0	0	0	0	0	0	0	0	0	0	0	0	0	0	0	0	0	0	0	0	0	0	0
d__Fungi|p__Ascomycota|c__Dothideomycetes|o__Tubeufiales|f__Tubeufiaceae|g__Tubeufiaceae_unclassified|s__Tubeufiaceae_unclassified	0	0	0	0	0	0	0	0	0	0	0	0	0	0	0	0	0	0	0	0	0	0	0	0	0	0	0	0	0	0	0	0	0	0	0	0	0	0	0	0	0	0	0	0	0	0	0	0	0
d__Fungi|p__Ascomycota|c__Dothideomycetes|o__Tubeufiales|f__Wiesneriomycetaceae	0	0	0	0	0	0	0	0	0	0	0	0	0	0.02135	0	0	0	0	0	0	0	0	0	0	0	0	0	0	0	0	0	0	0	0	0	0	0	0	0	0	0	0	0	0	0	0	0	0	0
d__Fungi|p__Ascomycota|c__Dothideomycetes|o__Tubeufiales|f__Wiesneriomycetaceae|g__Spissiomyces	0	0	0	0	0	0	0	0	0	0	0	0	0	0.02135	0	0	0	0	0	0	0	0	0	0	0	0	0	0	0	0	0	0	0	0	0	0	0	0	0	0	0	0	0	0	0	0	0	0	0
d__Fungi|p__Ascomycota|c__Dothideomycetes|o__Tubeufiales|f__Wiesneriomycetaceae|g__Spissiomyces|s__Spissiomyces_unclassified	0	0	0	0	0	0	0	0	0	0	0	0	0	0.02135	0	0	0	0	0	0	0	0	0	0	0	0	0	0	0	0	0	0	0	0	0	0	0	0	0	0	0	0	0	0	0	0	0	0	0
d__Fungi|p__Ascomycota|c__Eurotiomycetes	0.00242	11.149	0.00778	0.01948	1.70103	0.01823	0.01277	0	0.26991	0.78755	0.0323	0.16613	0.01873	0.66856	26.6211	0.13494	9.62273	11.8465	1.33098	40.0755	0.04409	0.18791	5.40119	3.89724	1.19299	13.0068	60.1509	0.01686	0.15311	6.84484	2.99104	37.9562	54.1028	14.835	1.47876	0.05184	0.38521	21.8364	5.3435	0.73979	0.16486	0.10432	64.9174	21.0492	3.53623	3.99032	0.12452	75.3499	0.01143
d__Fungi|p__Ascomycota|c__Eurotiomycetes|o__Chaetothyriales	0	0	0	0.01096	0	0	0	0	0	0	0	0.00519	0	0	0.02482	0.12765	9.61653	0	0	0.01096	0	0	0.0113	0	0.03697	0.03977	0	0	0	0	0	0.01793	0	0.01764	0	0	0.02437	0	0.00415	0	0	0.00248	0	0	0.44608	0	0.06534	0	0
d__Fungi|p__Ascomycota|c__Eurotiomycetes|o__Chaetothyriales|f__Chaetothyriaceae	0	0	0	0.00487	0	0	0	0	0	0	0	0.00519	0	0	0	0	0	0	0	0	0	0	0	0	0.00246	0	0	0	0	0	0	0	0	0.01008	0	0	0.02132	0	0	0	0	0	0	0	0	0	0.00493	0	0
d__Fungi|p__Ascomycota|c__Eurotiomycetes|o__Chaetothyriales|f__Chaetothyriaceae|g__Arthrophiala	0	0	0	0	0	0	0	0	0	0	0	0	0	0	0	0	0	0	0	0	0	0	0	0	0.00246	0	0	0	0	0	0	0	0	0	0	0	0	0	0	0	0	0	0	0	0	0	0	0	0
d__Fungi|p__Ascomycota|c__Eurotiomycetes|o__Chaetothyriales|f__Chaetothyriaceae|g__Arthrophiala|s__Arthrophiala_arthrospora	0	0	0	0	0	0	0	0	0	0	0	0	0	0	0	0	0	0	0	0	0	0	0	0	0.00246	0	0	0	0	0	0	0	0	0	0	0	0	0	0	0	0	0	0	0	0	0	0	0	0
d__Fungi|p__Ascomycota|c__Eurotiomycetes|o__Chaetothyriales|f__Chaetothyriaceae|g__Camptophora	0	0	0	0	0	0	0	0	0	0	0	0	0	0	0	0	0	0	0	0	0	0	0	0	0	0	0	0	0	0	0	0	0	0	0	0	0.02132	0	0	0	0	0	0	0	0	0	0	0	0
d__Fungi|p__Ascomycota|c__Eurotiomycetes|o__Chaetothyriales|f__Chaetothyriaceae|g__Camptophora|s__Camptophora_hylomeconis	0	0	0	0	0	0	0	0	0	0	0	0	0	0	0	0	0	0	0	0	0	0	0	0	0	0	0	0	0	0	0	0	0	0	0	0	0.02132	0	0	0	0	0	0	0	0	0	0	0	0
d__Fungi|p__Ascomycota|c__Eurotiomycetes|o__Chaetothyriales|f__Chaetothyriaceae|g__Chaetothyriaceae_unclassified	0	0	0	0.00487	0	0	0	0	0	0	0	0.00519	0	0	0	0	0	0	0	0	0	0	0	0	0	0	0	0	0	0	0	0	0	0.01008	0	0	0	0	0	0	0	0	0	0	0	0	0.00493	0	0
d__Fungi|p__Ascomycota|c__Eurotiomycetes|o__Chaetothyriales|f__Chaetothyriaceae|g__Chaetothyriaceae_unclassified|s__Chaetothyriaceae_unclassified	0	0	0	0.00487	0	0	0	0	0	0	0	0.00519	0	0	0	0	0	0	0	0	0	0	0	0	0	0	0	0	0	0	0	0	0	0.01008	0	0	0	0	0	0	0	0	0	0	0	0	0.00493	0	0
d__Fungi|p__Ascomycota|c__Eurotiomycetes|o__Chaetothyriales|f__Chaetothyriales_Incertae_sedis	0	0	0	0	0	0	0	0	0	0	0	0	0	0	0	0	0	0	0	0	0	0	0	0	0.02095	0.03079	0	0	0	0	0	0	0	0	0	0	0	0	0	0	0	0	0	0	0.44608	0	0	0	0
d__Fungi|p__Ascomycota|c__Eurotiomycetes|o__Chaetothyriales|f__Chaetothyriales_Incertae_sedis|g__Coniosporium	0	0	0	0	0	0	0	0	0	0	0	0	0	0	0	0	0	0	0	0	0	0	0	0	0	0	0	0	0	0	0	0	0	0	0	0	0	0	0	0	0	0	0	0	0	0	0	0	0
d__Fungi|p__Ascomycota|c__Eurotiomycetes|o__Chaetothyriales|f__Chaetothyriales_Incertae_sedis|g__Coniosporium|s__Coniosporium_apollinis	0	0	0	0	0	0	0	0	0	0	0	0	0	0	0	0	0	0	0	0	0	0	0	0	0	0	0	0	0	0	0	0	0	0	0	0	0	0	0	0	0	0	0	0	0	0	0	0	0
d__Fungi|p__Ascomycota|c__Eurotiomycetes|o__Chaetothyriales|f__Chaetothyriales_Incertae_sedis|g__Strelitziana	0	0	0	0	0	0	0	0	0	0	0	0	0	0	0	0	0	0	0	0	0	0	0	0	0.02095	0.03079	0	0	0	0	0	0	0	0	0	0	0	0	0	0	0	0	0	0	0.44608	0	0	0	0
d__Fungi|p__Ascomycota|c__Eurotiomycetes|o__Chaetothyriales|f__Chaetothyriales_Incertae_sedis|g__Strelitziana|s__Strelitziana_mali	0	0	0	0	0	0	0	0	0	0	0	0	0	0	0	0	0	0	0	0	0	0	0	0	0.02095	0.03079	0	0	0	0	0	0	0	0	0	0	0	0	0	0	0	0	0	0	0.44608	0	0	0	0
d__Fungi|p__Ascomycota|c__Eurotiomycetes|o__Chaetothyriales|f__Chaetothyriales_fam_Incertae_sedis	0	0	0	0	0	0	0	0	0	0	0	0	0	0	0.00993	0	0	0	0	0	0	0	0	0	0	0	0	0	0	0	0	0	0	0	0	0	0	0	0	0	0	0	0	0	0	0	0	0	0
d__Fungi|p__Ascomycota|c__Eurotiomycetes|o__Chaetothyriales|f__Chaetothyriales_fam_Incertae_sedis|g__Sarcinomyces	0	0	0	0	0	0	0	0	0	0	0	0	0	0	0.00993	0	0	0	0	0	0	0	0	0	0	0	0	0	0	0	0	0	0	0	0	0	0	0	0	0	0	0	0	0	0	0	0	0	0
d__Fungi|p__Ascomycota|c__Eurotiomycetes|o__Chaetothyriales|f__Chaetothyriales_fam_Incertae_sedis|g__Sarcinomyces|s__Sarcinomyces_unclassified	0	0	0	0	0	0	0	0	0	0	0	0	0	0	0.00993	0	0	0	0	0	0	0	0	0	0	0	0	0	0	0	0	0	0	0	0	0	0	0	0	0	0	0	0	0	0	0	0	0	0
d__Fungi|p__Ascomycota|c__Eurotiomycetes|o__Chaetothyriales|f__Chaetothyriales_unclassified	0	0	0	0	0	0	0	0	0	0	0	0	0	0	0	0	0	0	0	0	0	0	0	0	0	0	0	0	0	0	0	0	0	0	0	0	0	0	0	0	0	0	0	0	0	0	0	0	0
d__Fungi|p__Ascomycota|c__Eurotiomycetes|o__Chaetothyriales|f__Chaetothyriales_unclassified|g__Chaetothyriales_unclassified	0	0	0	0	0	0	0	0	0	0	0	0	0	0	0	0	0	0	0	0	0	0	0	0	0	0	0	0	0	0	0	0	0	0	0	0	0	0	0	0	0	0	0	0	0	0	0	0	0
d__Fungi|p__Ascomycota|c__Eurotiomycetes|o__Chaetothyriales|f__Chaetothyriales_unclassified|g__Chaetothyriales_unclassified|s__Chaetothyriales_unclassified	0	0	0	0	0	0	0	0	0	0	0	0	0	0	0	0	0	0	0	0	0	0	0	0	0	0	0	0	0	0	0	0	0	0	0	0	0	0	0	0	0	0	0	0	0	0	0	0	0
d__Fungi|p__Ascomycota|c__Eurotiomycetes|o__Chaetothyriales|f__Herpotrichiellaceae	0	0	0	0.00609	0	0	0	0	0	0	0	0	0	0	0.01117	0.12765	9.61653	0	0	0.01096	0	0	0.0113	0	0.01356	0.00898	0	0	0	0	0	0.01793	0	0.00756	0	0	0.00305	0	0.00415	0	0	0.00248	0	0	0	0	0.06041	0	0
d__Fungi|p__Ascomycota|c__Eurotiomycetes|o__Chaetothyriales|f__Herpotrichiellaceae|g__Cladophialophora	0	0	0	0	0	0	0	0	0	0	0	0	0	0	0.01117	0.12765	9.61653	0	0	0	0	0	0	0	0	0	0	0	0	0	0	0.01315	0	0	0	0	0.00305	0	0.00415	0	0	0	0	0	0	0	0	0	0
d__Fungi|p__Ascomycota|c__Eurotiomycetes|o__Chaetothyriales|f__Herpotrichiellaceae|g__Cladophialophora|s__Cladophialophora_chaetospira	0	0	0	0	0	0	0	0	0	0	0	0	0	0	0	0	0	0	0	0	0	0	0	0	0	0	0	0	0	0	0	0	0	0	0	0	0	0	0	0	0	0	0	0	0	0	0	0	0
d__Fungi|p__Ascomycota|c__Eurotiomycetes|o__Chaetothyriales|f__Herpotrichiellaceae|g__Cladophialophora|s__Cladophialophora_unclassified	0	0	0	0	0	0	0	0	0	0	0	0	0	0	0.01117	0.12765	9.61653	0	0	0	0	0	0	0	0	0	0	0	0	0	0	0.01315	0	0	0	0	0.00305	0	0.00415	0	0	0	0	0	0	0	0	0	0
d__Fungi|p__Ascomycota|c__Eurotiomycetes|o__Chaetothyriales|f__Herpotrichiellaceae|g__Exophiala	0	0	0	0.00609	0	0	0	0	0	0	0	0	0	0	0	0	0	0	0	0.01096	0	0	0	0	0.00493	0	0	0	0	0	0	0.00478	0	0.00756	0	0	0	0	0	0	0	0.00248	0	0	0	0	0.05424	0	0
d__Fungi|p__Ascomycota|c__Eurotiomycetes|o__Chaetothyriales|f__Herpotrichiellaceae|g__Exophiala|s__Exophiala_equina	0	0	0	0.00609	0	0	0	0	0	0	0	0	0	0	0	0	0	0	0	0.01096	0	0	0	0	0	0	0	0	0	0	0	0	0	0.00756	0	0	0	0	0	0	0	0.00248	0	0	0	0	0.03082	0	0
d__Fungi|p__Ascomycota|c__Eurotiomycetes|o__Chaetothyriales|f__Herpotrichiellaceae|g__Exophiala|s__Exophiala_oligosperma	0	0	0	0	0	0	0	0	0	0	0	0	0	0	0	0	0	0	0	0	0	0	0	0	0.00493	0	0	0	0	0	0	0	0	0	0	0	0	0	0	0	0	0	0	0	0	0	0	0	0
d__Fungi|p__Ascomycota|c__Eurotiomycetes|o__Chaetothyriales|f__Herpotrichiellaceae|g__Exophiala|s__Exophiala_sp_KL_2011f	0	0	0	0	0	0	0	0	0	0	0	0	0	0	0	0	0	0	0	0	0	0	0	0	0	0	0	0	0	0	0	0	0	0	0	0	0	0	0	0	0	0	0	0	0	0	0.02342	0	0
d__Fungi|p__Ascomycota|c__Eurotiomycetes|o__Chaetothyriales|f__Herpotrichiellaceae|g__Exophiala|s__Exophiala_unclassified	0	0	0	0	0	0	0	0	0	0	0	0	0	0	0	0	0	0	0	0	0	0	0	0	0	0	0	0	0	0	0	0.00478	0	0	0	0	0	0	0	0	0	0	0	0	0	0	0	0	0
d__Fungi|p__Ascomycota|c__Eurotiomycetes|o__Chaetothyriales|f__Herpotrichiellaceae|g__Phaeococcomyces	0	0	0	0	0	0	0	0	0	0	0	0	0	0	0	0	0	0	0	0	0	0	0	0	0	0	0	0	0	0	0	0	0	0	0	0	0	0	0	0	0	0	0	0	0	0	0.00247	0	0
d__Fungi|p__Ascomycota|c__Eurotiomycetes|o__Chaetothyriales|f__Herpotrichiellaceae|g__Phaeococcomyces|s__Phaeococcomyces_catenatus	0	0	0	0	0	0	0	0	0	0	0	0	0	0	0	0	0	0	0	0	0	0	0	0	0	0	0	0	0	0	0	0	0	0	0	0	0	0	0	0	0	0	0	0	0	0	0.00247	0	0
d__Fungi|p__Ascomycota|c__Eurotiomycetes|o__Chaetothyriales|f__Herpotrichiellaceae|g__Phialophora	0	0	0	0	0	0	0	0	0	0	0	0	0	0	0	0	0	0	0	0	0	0	0.0113	0	0.00863	0.00513	0	0	0	0	0	0	0	0	0	0	0	0	0	0	0	0	0	0	0	0	0.0037	0	0
d__Fungi|p__Ascomycota|c__Eurotiomycetes|o__Chaetothyriales|f__Herpotrichiellaceae|g__Phialophora|s__Phialophora_cyclaminis	0	0	0	0	0	0	0	0	0	0	0	0	0	0	0	0	0	0	0	0	0	0	0.0113	0	0.00863	0.00513	0	0	0	0	0	0	0	0	0	0	0	0	0	0	0	0	0	0	0	0	0.0037	0	0
d__Fungi|p__Ascomycota|c__Eurotiomycetes|o__Chaetothyriales|f__Herpotrichiellaceae|g__Rhinocladiella	0	0	0	0	0	0	0	0	0	0	0	0	0	0	0	0	0	0	0	0	0	0	0	0	0	0.00385	0	0	0	0	0	0	0	0	0	0	0	0	0	0	0	0	0	0	0	0	0	0	0
d__Fungi|p__Ascomycota|c__Eurotiomycetes|o__Chaetothyriales|f__Herpotrichiellaceae|g__Rhinocladiella|s__Rhinocladiella_sp_YH_2009a	0	0	0	0	0	0	0	0	0	0	0	0	0	0	0	0	0	0	0	0	0	0	0	0	0	0.00385	0	0	0	0	0	0	0	0	0	0	0	0	0	0	0	0	0	0	0	0	0	0	0
d__Fungi|p__Ascomycota|c__Eurotiomycetes|o__Chaetothyriales|f__Trichomeriaceae	0	0	0	0	0	0	0	0	0	0	0	0	0	0	0.00372	0	0	0	0	0	0	0	0	0	0	0	0	0	0	0	0	0	0	0	0	0	0	0	0	0	0	0	0	0	0	0	0	0	0
d__Fungi|p__Ascomycota|c__Eurotiomycetes|o__Chaetothyriales|f__Trichomeriaceae|g__Trichomeriaceae_unclassified	0	0	0	0	0	0	0	0	0	0	0	0	0	0	0.00372	0	0	0	0	0	0	0	0	0	0	0	0	0	0	0	0	0	0	0	0	0	0	0	0	0	0	0	0	0	0	0	0	0	0
d__Fungi|p__Ascomycota|c__Eurotiomycetes|o__Chaetothyriales|f__Trichomeriaceae|g__Trichomeriaceae_unclassified|s__Trichomeriaceae_unclassified	0	0	0	0	0	0	0	0	0	0	0	0	0	0	0.00372	0	0	0	0	0	0	0	0	0	0	0	0	0	0	0	0	0	0	0	0	0	0	0	0	0	0	0	0	0	0	0	0	0	0
d__Fungi|p__Ascomycota|c__Eurotiomycetes|o__Eurotiales	0.00242	0.23401	0.00778	0.00852	1.70103	0.01823	0.01277	0	0.26991	0.78755	0.0323	0.15834	0.01873	0.66856	26.5888	0.00486	0.0062	11.8465	1.32596	40.0645	0.04409	0.18791	0.09923	3.80614	0.96746	0.32068	60.1437	0.01686	0.12011	6.84484	2.99104	37.7661	0.03212	14.8174	1.47876	0.01481	0.35627	21.8364	5.33658	0.43496	0.15725	0.10184	64.9174	21.0492	3.09015	3.99032	0.0148	75.3499	0.00286
d__Fungi|p__Ascomycota|c__Eurotiomycetes|o__Eurotiales|f__Eurotiales_Incertae_sedis	0	0	0.00778	0	0	0	0	0	0	0	0.01794	0	0.00669	0	0	0	0	0	0.85384	0	0	0	0	0	0	0	39.6659	0.00649	0	0	0.00484	0	0	10.7164	0.31946	0	0.02284	0	5.27153	0	0	0.00373	15.2097	0	1.92511	0	0	0	0.00286
d__Fungi|p__Ascomycota|c__Eurotiomycetes|o__Eurotiales|f__Eurotiales_Incertae_sedis|g__Thermomyces	0	0	0.00778	0	0	0	0	0	0	0	0.01794	0	0.00669	0	0	0	0	0	0.85384	0	0	0	0	0	0	0	39.6659	0.00649	0	0	0.00484	0	0	10.7164	0.31946	0	0.02284	0	5.27153	0	0	0.00373	15.2097	0	1.92511	0	0	0	0.00286
d__Fungi|p__Ascomycota|c__Eurotiomycetes|o__Eurotiales|f__Eurotiales_Incertae_sedis|g__Thermomyces|s__Thermomyces_lanuginosus	0	0	0.00778	0	0	0	0	0	0	0	0.01794	0	0.00669	0	0	0	0	0	0.85384	0	0	0	0	0	0	0	39.6659	0.00649	0	0	0.00484	0	0	10.7164	0.31946	0	0.02284	0	5.27153	0	0	0.00373	15.2097	0	1.92511	0	0	0	0.00286
d__Fungi|p__Ascomycota|c__Eurotiomycetes|o__Eurotiales|f__Trichocomaceae	0.00242	0.23401	0	0.00852	1.70103	0.01823	0.01277	0	0.26991	0.78755	0.01436	0.15834	0.01204	0.66856	26.5888	0.00486	0.0062	11.8465	0.47212	40.0645	0.04409	0.18791	0.09923	3.80614	0.96746	0.32068	20.4778	0.01037	0.12011	6.84484	2.9862	37.7661	0.03212	4.10102	1.1593	0.01481	0.33343	21.8364	0.06505	0.43496	0.15725	0.09811	49.7077	21.0492	1.16504	3.99032	0.0148	75.3499	0
d__Fungi|p__Ascomycota|c__Eurotiomycetes|o__Eurotiales|f__Trichocomaceae|g__Aspergillus	0	0.11394	0	0.00365	1.70103	0	0.00383	0	0	0	0	0.01817	0	0	0	0	0	0	0	0.38358	0.04409	0.18791	0.01005	0	0.88736	0.15906	0	0	0	6.84484	2.9862	0.12318	0.03212	1.31954	0.17596	0	0.03806	0	0.01661	0.03976	0.13696	0	0	0	0.06978	3.98417	0.01233	75.3424	0
d__Fungi|p__Ascomycota|c__Eurotiomycetes|o__Eurotiales|f__Trichocomaceae|g__Aspergillus|s__Aspergillus_bridgeri	0	0	0	0	0	0	0	0	0	0	0	0	0	0	0	0	0	0	0	0	0.04409	0	0	0	0	0	0	0	0	0	0	0	0	0	0	0	0	0	0	0	0	0	0	0	0	0	0	0	0
d__Fungi|p__Ascomycota|c__Eurotiomycetes|o__Eurotiales|f__Trichocomaceae|g__Aspergillus|s__Aspergillus_calidoustus	0	0	0	0	0	0	0	0	0	0	0	0	0	0	0	0	0	0	0	0	0	0	0	0	0	0	0	0	0	0	0	0	0	0	0	0	0.03806	0	0	0	0	0	0	0	0	0	0	0	0
d__Fungi|p__Ascomycota|c__Eurotiomycetes|o__Eurotiales|f__Trichocomaceae|g__Aspergillus|s__Aspergillus_penicillioides	0	0	0	0	0	0	0	0	0	0	0	0.01817	0	0	0	0	0	0	0	0.38358	0	0.18791	0	0	0.01109	0	0	0	0	6.84484	0	0	0.01028	0	0.17596	0	0	0	0.00415	0.03615	0.13696	0	0	0	0	0	0.00493	0.003	0
d__Fungi|p__Ascomycota|c__Eurotiomycetes|o__Eurotiales|f__Trichocomaceae|g__Aspergillus|s__Aspergillus_restrictus	0	0	0	0	0	0	0	0	0	0	0	0	0	0	0	0	0	0	0	0	0	0	0	0	0	0	0	0	0	0	0	0	0	0	0	0	0	0	0	0	0	0	0	0	0.06978	0	0	0	0
d__Fungi|p__Ascomycota|c__Eurotiomycetes|o__Eurotiales|f__Trichocomaceae|g__Aspergillus|s__Aspergillus_unclassified	0	0	0	0	0	0	0	0	0	0	0	0	0	0	0	0	0	0	0	0	0	0	0	0	0	0	0	0	0	0	0	0.1172	0	1.31954	0	0	0	0	0	0.00361	0	0	0	0	0	0	0	0	0
d__Fungi|p__Ascomycota|c__Eurotiomycetes|o__Eurotiales|f__Trichocomaceae|g__Aspergillus|s__Aspergillus_versicolor	0	0.11394	0	0.00365	1.70103	0	0	0	0	0	0	0	0	0	0	0	0	0	0	0	0	0	0	0	0.0037	0.15906	0	0	0	0	2.9862	0	0	0	0	0	0	0	0	0	0	0	0	0	0	0	0	0	0
d__Fungi|p__Ascomycota|c__Eurotiomycetes|o__Eurotiales|f__Trichocomaceae|g__Aspergillus|s__Aspergillus_vitricola	0	0	0	0	0	0	0.00383	0	0	0	0	0	0	0	0	0	0	0	0	0	0	0	0.01005	0	0.87257	0	0	0	0	0	0	0.00598	0.02184	0	0	0	0	0	0.01246	0	0	0	0	0	0	3.98417	0.0074	75.3394	0
d__Fungi|p__Ascomycota|c__Eurotiomycetes|o__Eurotiales|f__Trichocomaceae|g__Eupenicillium	0	0	0	0	0	0	0	0	0	0	0	0	0	0	0	0	0	0	0	0	0	0	0	0	0	0	0	0	0	0	0	0	0	0	0	0	0	0	0	0	0	0	0	0	0	0	0	0	0
d__Fungi|p__Ascomycota|c__Eurotiomycetes|o__Eurotiales|f__Trichocomaceae|g__Eupenicillium|s__Eupenicillium_unclassified	0	0	0	0	0	0	0	0	0	0	0	0	0	0	0	0	0	0	0	0	0	0	0	0	0	0	0	0	0	0	0	0	0	0	0	0	0	0	0	0	0	0	0	0	0	0	0	0	0
d__Fungi|p__Ascomycota|c__Eurotiomycetes|o__Eurotiales|f__Trichocomaceae|g__Eurotium	0	0	0	0	0	0.01367	0	0	0.26748	0	0	0	0	0	0.00248	0	0.00372	0	0.01507	0	0	0	0.08918	0.03668	0	0	0	0	0.02244	0	0	0.04186	0	0	0	0	0.00305	19.7984	0.00415	0	0	0.00745	0.0482	0	0.00374	0.00246	0	0	0
d__Fungi|p__Ascomycota|c__Eurotiomycetes|o__Eurotiales|f__Trichocomaceae|g__Eurotium|s__Aspergillus_reptans	0	0	0	0	0	0	0	0	0	0	0	0	0	0	0	0	0	0	0	0	0	0	0	0	0	0	0	0	0	0	0	0	0	0	0	0	0	0.0039	0	0	0	0	0	0	0	0	0	0	0
d__Fungi|p__Ascomycota|c__Eurotiomycetes|o__Eurotiales|f__Trichocomaceae|g__Eurotium|s__Eurotium_amstelodami	0	0	0	0	0	0.01367	0	0	0.26748	0	0	0	0	0	0.00248	0	0.00372	0	0	0	0	0	0.00502	0.03668	0	0	0	0	0.02244	0	0	0.04186	0	0	0	0	0.00305	0	0.00415	0	0	0.00745	0.0482	0	0.00374	0.00246	0	0	0
d__Fungi|p__Ascomycota|c__Eurotiomycetes|o__Eurotiales|f__Trichocomaceae|g__Eurotium|s__Eurotium_halophilicum	0	0	0	0	0	0	0	0	0	0	0	0	0	0	0	0	0	0	0	0	0	0	0.08416	0	0	0	0	0	0	0	0	0	0	0	0	0	0	0	0	0	0	0	0	0	0	0	0	0	0
d__Fungi|p__Ascomycota|c__Eurotiomycetes|o__Eurotiales|f__Trichocomaceae|g__Eurotium|s__Eurotium_unclassified	0	0	0	0	0	0	0	0	0	0	0	0	0	0	0	0	0	0	0.01507	0	0	0	0	0	0	0	0	0	0	0	0	0	0	0	0	0	0	19.7945	0	0	0	0	0	0	0	0	0	0	0
d__Fungi|p__Ascomycota|c__Eurotiomycetes|o__Eurotiales|f__Trichocomaceae|g__Paecilomyces	0	0	0	0	0	0	0	0	0.00243	0.56536	0	0	0	0	26.5814	0.00486	0.00248	4.97799	0	0	0	0	0	0	0	0	0	0	0	0	0	0	0	0	0.04617	0.01481	0	0	0	0.00361	0	0	2.15304	0	0	0	0	0	0
d__Fungi|p__Ascomycota|c__Eurotiomycetes|o__Eurotiales|f__Trichocomaceae|g__Paecilomyces|s__Paecilomyces_variotii	0	0	0	0	0	0	0	0	0.00243	0.56536	0	0	0	0	26.5814	0.00486	0.00248	4.97799	0	0	0	0	0	0	0	0	0	0	0	0	0	0	0	0	0.04617	0.01481	0	0	0	0.00361	0	0	2.15304	0	0	0	0	0	0
d__Fungi|p__Ascomycota|c__Eurotiomycetes|o__Eurotiales|f__Trichocomaceae|g__Penicillium	0	0	0	0	0	0	0.00894	0	0	0	0	0	0	0	0	0	0	0	0	0	0	0	0	0.00828	0	0	0	0	0	0	0	0	0	0	0	0	0	0	0	0	0	0	0	0	0	0	0	0	0
d__Fungi|p__Ascomycota|c__Eurotiomycetes|o__Eurotiales|f__Trichocomaceae|g__Penicillium|s__Penicillium_brevicompactum	0	0	0	0	0	0	0	0	0	0	0	0	0	0	0	0	0	0	0	0	0	0	0	0	0	0	0	0	0	0	0	0	0	0	0	0	0	0	0	0	0	0	0	0	0	0	0	0	0
d__Fungi|p__Ascomycota|c__Eurotiomycetes|o__Eurotiales|f__Trichocomaceae|g__Penicillium|s__Penicillium_oxalicum	0	0	0	0	0	0	0.00894	0	0	0	0	0	0	0	0	0	0	0	0	0	0	0	0	0	0	0	0	0	0	0	0	0	0	0	0	0	0	0	0	0	0	0	0	0	0	0	0	0	0
d__Fungi|p__Ascomycota|c__Eurotiomycetes|o__Eurotiales|f__Trichocomaceae|g__Penicillium|s__Penicillium_unclassified	0	0	0	0	0	0	0	0	0	0	0	0	0	0	0	0	0	0	0	0	0	0	0	0	0	0	0	0	0	0	0	0	0	0	0	0	0	0	0	0	0	0	0	0	0	0	0	0	0
d__Fungi|p__Ascomycota|c__Eurotiomycetes|o__Eurotiales|f__Trichocomaceae|g__Penicillium|s__Penicillium_variabile	0	0	0	0	0	0	0	0	0	0	0	0	0	0	0	0	0	0	0	0	0	0	0	0.00828	0	0	0	0	0	0	0	0	0	0	0	0	0	0	0	0	0	0	0	0	0	0	0	0	0
d__Fungi|p__Ascomycota|c__Eurotiomycetes|o__Eurotiales|f__Trichocomaceae|g__Petromyces	0	0.12007	0	0	0	0	0	0	0	0	0	0	0	0	0	0	0	0	0	0	0	0	0	0	0.00739	0.16162	0	0	0	0	0	0	0	0	0	0	0	0	0	0	0	0	0	0.04074	0	0	0.00247	0	0
d__Fungi|p__Ascomycota|c__Eurotiomycetes|o__Eurotiales|f__Trichocomaceae|g__Petromyces|s__Aspergillus_flavus	0	0.12007	0	0	0	0	0	0	0	0	0	0	0	0	0	0	0	0	0	0	0	0	0	0	0.00739	0.16162	0	0	0	0	0	0	0	0	0	0	0	0	0	0	0	0	0	0	0	0	0.00247	0	0
d__Fungi|p__Ascomycota|c__Eurotiomycetes|o__Eurotiales|f__Trichocomaceae|g__Petromyces|s__Petromyces_unclassified	0	0	0	0	0	0	0	0	0	0	0	0	0	0	0	0	0	0	0	0	0	0	0	0	0	0	0	0	0	0	0	0	0	0	0	0	0	0	0	0	0	0	0	0.04074	0	0	0	0	0
d__Fungi|p__Ascomycota|c__Eurotiomycetes|o__Eurotiales|f__Trichocomaceae|g__Talaromyces	0.00242	0	0	0	0	0	0	0	0	0	0	0	0	0.66856	0.00496	0	0	6.86846	0	0	0	0	0	0.14079	0.07271	0	0	0	0.09107	0	0	37.5843	0	0.01386	0.03369	0	0.29232	0	0.04429	0.39159	0	0.0683	1.60428	17.9836	0	0	0	0.00751	0
d__Fungi|p__Ascomycota|c__Eurotiomycetes|o__Eurotiales|f__Trichocomaceae|g__Talaromyces|s__Penicillium_minioluteum	0	0	0	0	0	0	0	0	0	0	0	0	0	0	0	0	0	0	0	0	0	0	0	0	0	0	0	0	0	0	0	0	0	0	0.01872	0	0	0	0	0	0	0	0.86641	0	0	0	0	0	0
d__Fungi|p__Ascomycota|c__Eurotiomycetes|o__Eurotiales|f__Trichocomaceae|g__Talaromyces|s__Talaromyces_purpurogenus	0	0	0	0	0	0	0	0	0	0	0	0	0	0.66856	0	0	0	0	0	0	0	0	0	0	0	0	0	0	0	0	0	0	0	0.00252	0	0	0.29232	0	0	0	0	0.0683	0	0	0	0	0	0.00751	0
d__Fungi|p__Ascomycota|c__Eurotiomycetes|o__Eurotiales|f__Trichocomaceae|g__Talaromyces|s__Talaromyces_sp_YYS_2011	0	0	0	0	0	0	0	0	0	0	0	0	0	0	0	0	0	0	0	0	0	0	0	0	0	0	0	0	0	0	0	0	0	0	0.01497	0	0	0	0	0	0	0	0.73787	0	0	0	0	0	0
d__Fungi|p__Ascomycota|c__Eurotiomycetes|o__Eurotiales|f__Trichocomaceae|g__Talaromyces|s__Talaromyces_trachyspermus	0	0	0	0	0	0	0	0	0	0	0	0	0	0	0	0	0	0	0	0	0	0	0	0	0	0	0	0	0	0	0	0	0	0.01134	0	0	0	0	0	0	0	0	0	0	0	0	0	0	0
d__Fungi|p__Ascomycota|c__Eurotiomycetes|o__Eurotiales|f__Trichocomaceae|g__Talaromyces|s__Talaromyces_unclassified	0.00242	0	0	0	0	0	0	0	0	0	0	0	0	0	0.00496	0	0	6.86846	0	0	0	0	0	0.14079	0.07271	0	0	0	0.09107	0	0	37.5843	0	0	0	0	0	0	0.04429	0.39159	0	0	0	17.9836	0	0	0	0	0
d__Fungi|p__Ascomycota|c__Eurotiomycetes|o__Eurotiales|f__Trichocomaceae|g__Thermoascus	0	0	0	0	0	0	0	0	0	0.22219	0.01436	0	0.01204	0	0	0	0	0	0.44952	0	0	0	0	3.60738	0	0	20.4778	0.00778	0	0	0	0	0	2.76762	0.90348	0	0	2.03798	0	0	0.02029	0.02236	45.9022	3.02484	1.09152	0.00369	0	0	0
d__Fungi|p__Ascomycota|c__Eurotiomycetes|o__Eurotiales|f__Trichocomaceae|g__Thermoascus|s__Thermoascus_aurantiacus	0	0	0	0	0	0	0	0	0	0.22219	0.01436	0	0	0	0	0	0	0	0.44952	0	0	0	0	3.60265	0	0	20.4778	0.00778	0	0	0	0	0	1.18216	0.37936	0	0	2.03798	0	0	0.00634	0.01118	17.9448	3.02484	0	0	0	0	0
d__Fungi|p__Ascomycota|c__Eurotiomycetes|o__Eurotiales|f__Trichocomaceae|g__Thermoascus|s__Thermoascus_crustaceus	0	0	0	0	0	0	0	0	0	0	0	0	0.01204	0	0	0	0	0	0	0	0	0	0	0.00473	0	0	0	0	0	0	0	0	0	1.58546	0.52412	0	0	0	0	0	0.01395	0.01118	27.9573	0	1.09152	0.00369	0	0	0
d__Fungi|p__Ascomycota|c__Eurotiomycetes|o__Eurotiales|f__Trichocomaceae|g__Trichocomaceae_unclassified	0	0	0	0.00487	0	0.00456	0	0	0	0	0	0.14017	0	0	0	0	0	0	0.00753	39.681	0	0	0	0.01301	0	0	0	0.00259	0.0066	0	0	0.01674	0	0	0	0	0	0	0	0	0	0	0	0	0	0	0	0	0
d__Fungi|p__Ascomycota|c__Eurotiomycetes|o__Eurotiales|f__Trichocomaceae|g__Trichocomaceae_unclassified|s__Trichocomaceae_unclassified	0	0	0	0.00487	0	0.00456	0	0	0	0	0	0.14017	0	0	0	0	0	0	0.00753	39.681	0	0	0	0.01301	0	0	0	0.00259	0.0066	0	0	0.01674	0	0	0	0	0	0	0	0	0	0	0	0	0	0	0	0	0
d__Fungi|p__Ascomycota|c__Eurotiomycetes|o__Eurotiomycetes_unclassified	0	0	0	0	0	0	0	0	0	0	0	0	0	0	0	0	0	0	0	0	0	0	0	0	0	0	0	0	0	0	0	0	0	0	0	0	0	0	0	0	0	0	0	0	0	0	0	0	0
d__Fungi|p__Ascomycota|c__Eurotiomycetes|o__Eurotiomycetes_unclassified|f__Eurotiomycetes_unclassified	0	0	0	0	0	0	0	0	0	0	0	0	0	0	0	0	0	0	0	0	0	0	0	0	0	0	0	0	0	0	0	0	0	0	0	0	0	0	0	0	0	0	0	0	0	0	0	0	0
d__Fungi|p__Ascomycota|c__Eurotiomycetes|o__Eurotiomycetes_unclassified|f__Eurotiomycetes_unclassified|g__Eurotiomycetes_unclassified	0	0	0	0	0	0	0	0	0	0	0	0	0	0	0	0	0	0	0	0	0	0	0	0	0	0	0	0	0	0	0	0	0	0	0	0	0	0	0	0	0	0	0	0	0	0	0	0	0
d__Fungi|p__Ascomycota|c__Eurotiomycetes|o__Eurotiomycetes_unclassified|f__Eurotiomycetes_unclassified|g__Eurotiomycetes_unclassified|s__Eurotiomycetes_unclassified	0	0	0	0	0	0	0	0	0	0	0	0	0	0	0	0	0	0	0	0	0	0	0	0	0	0	0	0	0	0	0	0	0	0	0	0	0	0	0	0	0	0	0	0	0	0	0	0	0
d__Fungi|p__Ascomycota|c__Eurotiomycetes|o__Eurotiomycetidae_Incertae_sedis	0	10.9149	0	0	0	0	0	0	0	0	0	0	0	0	0.00744	0.00243	0	0	0	0	0	0	5.28689	0.0911	0.18856	12.6464	0	0	0.033	0	0	0.17221	0	0	0	0.03703	0.00457	0	0.00277	0.30483	0	0	0	0	0	0	0.00863	0	0
d__Fungi|p__Ascomycota|c__Eurotiomycetes|o__Eurotiomycetidae_Incertae_sedis|f__Monascaceae	0	10.9149	0	0	0	0	0	0	0	0	0	0	0	0	0.00744	0.00243	0	0	0	0	0	0	5.28689	0.0911	0.18856	12.6464	0	0	0.033	0	0	0.17221	0	0	0	0.03703	0.00457	0	0.00277	0.30483	0	0	0	0	0	0	0.00863	0	0
d__Fungi|p__Ascomycota|c__Eurotiomycetes|o__Eurotiomycetidae_Incertae_sedis|f__Monascaceae|g__Monascus	0	10.9149	0	0	0	0	0	0	0	0	0	0	0	0	0.00744	0.00243	0	0	0	0	0	0	5.28689	0.0911	0.18856	12.6464	0	0	0.033	0	0	0.17221	0	0	0	0	0.00457	0	0.00277	0.30483	0	0	0	0	0	0	0.00863	0	0
d__Fungi|p__Ascomycota|c__Eurotiomycetes|o__Eurotiomycetidae_Incertae_sedis|f__Monascaceae|g__Monascus|s__Monascus_fuliginosus	0	0	0	0	0	0	0	0	0	0	0	0	0	0	0	0	0	0	0	0	0	0	0	0	0	0	0	0	0	0	0	0	0	0	0	0	0	0	0	0.30483	0	0	0	0	0	0	0	0	0
d__Fungi|p__Ascomycota|c__Eurotiomycetes|o__Eurotiomycetidae_Incertae_sedis|f__Monascaceae|g__Monascus|s__Monascus_kaoliang	0	10.9149	0	0	0	0	0	0	0	0	0	0	0	0	0.00744	0.00243	0	0	0	0	0	0	5.28689	0.0911	0.18856	12.6464	0	0	0.033	0	0	0.17221	0	0	0	0	0.00457	0	0.00277	0	0	0	0	0	0	0	0.00863	0	0
d__Fungi|p__Ascomycota|c__Eurotiomycetes|o__Eurotiomycetidae_Incertae_sedis|f__Monascaceae|g__Monascus|s__Monascus_unclassified	0	0	0	0	0	0	0	0	0	0	0	0	0	0	0	0	0	0	0	0	0	0	0	0	0	0	0	0	0	0	0	0	0	0	0	0	0	0	0	0	0	0	0	0	0	0	0	0	0
d__Fungi|p__Ascomycota|c__Eurotiomycetes|o__Eurotiomycetidae_Incertae_sedis|f__Monascaceae|g__Xeromyces	0	0	0	0	0	0	0	0	0	0	0	0	0	0	0	0	0	0	0	0	0	0	0	0	0	0	0	0	0	0	0	0	0	0	0	0.03703	0	0	0	0	0	0	0	0	0	0	0	0	0
d__Fungi|p__Ascomycota|c__Eurotiomycetes|o__Eurotiomycetidae_Incertae_sedis|f__Monascaceae|g__Xeromyces|s__Xeromyces_bisporus	0	0	0	0	0	0	0	0	0	0	0	0	0	0	0	0	0	0	0	0	0	0	0	0	0	0	0	0	0	0	0	0	0	0	0	0.03703	0	0	0	0	0	0	0	0	0	0	0	0	0
d__Fungi|p__Ascomycota|c__Eurotiomycetes|o__Onygenales	0	0	0	0	0	0	0	0	0	0	0	0.0026	0	0	0	0	0	0	0	0	0	0	0.00377	0	0	0	0	0	0	0	0	0	0	0	0	0	0	0	0	0	0	0	0	0	0	0	0	0	0
d__Fungi|p__Ascomycota|c__Eurotiomycetes|o__Onygenales|f__Arachnomycetaceae	0	0	0	0	0	0	0	0	0	0	0	0	0	0	0	0	0	0	0	0	0	0	0	0	0	0	0	0	0	0	0	0	0	0	0	0	0	0	0	0	0	0	0	0	0	0	0	0	0
d__Fungi|p__Ascomycota|c__Eurotiomycetes|o__Onygenales|f__Arachnomycetaceae|g__Arachnomyces	0	0	0	0	0	0	0	0	0	0	0	0	0	0	0	0	0	0	0	0	0	0	0	0	0	0	0	0	0	0	0	0	0	0	0	0	0	0	0	0	0	0	0	0	0	0	0	0	0
d__Fungi|p__Ascomycota|c__Eurotiomycetes|o__Onygenales|f__Arachnomycetaceae|g__Arachnomyces|s__Arachnomyces_unclassified	0	0	0	0	0	0	0	0	0	0	0	0	0	0	0	0	0	0	0	0	0	0	0	0	0	0	0	0	0	0	0	0	0	0	0	0	0	0	0	0	0	0	0	0	0	0	0	0	0
d__Fungi|p__Ascomycota|c__Eurotiomycetes|o__Onygenales|f__Arthrodermataceae	0	0	0	0	0	0	0	0	0	0	0	0	0	0	0	0	0	0	0	0	0	0	0.00377	0	0	0	0	0	0	0	0	0	0	0	0	0	0	0	0	0	0	0	0	0	0	0	0	0	0
d__Fungi|p__Ascomycota|c__Eurotiomycetes|o__Onygenales|f__Arthrodermataceae|g__Trichophyton	0	0	0	0	0	0	0	0	0	0	0	0	0	0	0	0	0	0	0	0	0	0	0.00377	0	0	0	0	0	0	0	0	0	0	0	0	0	0	0	0	0	0	0	0	0	0	0	0	0	0
d__Fungi|p__Ascomycota|c__Eurotiomycetes|o__Onygenales|f__Arthrodermataceae|g__Trichophyton|s__Trichophyton_rubrum	0	0	0	0	0	0	0	0	0	0	0	0	0	0	0	0	0	0	0	0	0	0	0.00377	0	0	0	0	0	0	0	0	0	0	0	0	0	0	0	0	0	0	0	0	0	0	0	0	0	0
d__Fungi|p__Ascomycota|c__Eurotiomycetes|o__Onygenales|f__Gymnoascaceae	0	0	0	0	0	0	0	0	0	0	0	0.0026	0	0	0	0	0	0	0	0	0	0	0	0	0	0	0	0	0	0	0	0	0	0	0	0	0	0	0	0	0	0	0	0	0	0	0	0	0
d__Fungi|p__Ascomycota|c__Eurotiomycetes|o__Onygenales|f__Gymnoascaceae|g__Gymnoascus	0	0	0	0	0	0	0	0	0	0	0	0.0026	0	0	0	0	0	0	0	0	0	0	0	0	0	0	0	0	0	0	0	0	0	0	0	0	0	0	0	0	0	0	0	0	0	0	0	0	0
d__Fungi|p__Ascomycota|c__Eurotiomycetes|o__Onygenales|f__Gymnoascaceae|g__Gymnoascus|s__Gymnoascus_reesii	0	0	0	0	0	0	0	0	0	0	0	0.0026	0	0	0	0	0	0	0	0	0	0	0	0	0	0	0	0	0	0	0	0	0	0	0	0	0	0	0	0	0	0	0	0	0	0	0	0	0
d__Fungi|p__Ascomycota|c__Eurotiomycetes|o__Onygenales|f__Onygenaceae	0	0	0	0	0	0	0	0	0	0	0	0	0	0	0	0	0	0	0	0	0	0	0	0	0	0	0	0	0	0	0	0	0	0	0	0	0	0	0	0	0	0	0	0	0	0	0	0	0
d__Fungi|p__Ascomycota|c__Eurotiomycetes|o__Onygenales|f__Onygenaceae|g__Chrysosporium	0	0	0	0	0	0	0	0	0	0	0	0	0	0	0	0	0	0	0	0	0	0	0	0	0	0	0	0	0	0	0	0	0	0	0	0	0	0	0	0	0	0	0	0	0	0	0	0	0
d__Fungi|p__Ascomycota|c__Eurotiomycetes|o__Onygenales|f__Onygenaceae|g__Chrysosporium|s__Aphanoascus_reticulisporus	0	0	0	0	0	0	0	0	0	0	0	0	0	0	0	0	0	0	0	0	0	0	0	0	0	0	0	0	0	0	0	0	0	0	0	0	0	0	0	0	0	0	0	0	0	0	0	0	0
d__Fungi|p__Ascomycota|c__Eurotiomycetes|o__Verrucariales	0	0	0	0	0	0	0	0	0	0	0	0	0	0	0	0	0	0	0.00502	0	0	0	0	0	0	0	0.00718	0	0	0	0	0	54.0707	0	0	0	0	0	0	0	0.00761	0	0	0	0	0	0.03575	0	0.00857
d__Fungi|p__Ascomycota|c__Eurotiomycetes|o__Verrucariales|f__Verrucariaceae	0	0	0	0	0	0	0	0	0	0	0	0	0	0	0	0	0	0	0.00502	0	0	0	0	0	0	0	0.00718	0	0	0	0	0	54.0707	0	0	0	0	0	0	0	0.00761	0	0	0	0	0	0.03575	0	0.00857
d__Fungi|p__Ascomycota|c__Eurotiomycetes|o__Verrucariales|f__Verrucariaceae|g__Verrucariaceae_unclassified	0	0	0	0	0	0	0	0	0	0	0	0	0	0	0	0	0	0	0.00502	0	0	0	0	0	0	0	0.00718	0	0	0	0	0	54.0707	0	0	0	0	0	0	0	0.00761	0	0	0	0	0	0.03575	0	0.00857
d__Fungi|p__Ascomycota|c__Eurotiomycetes|o__Verrucariales|f__Verrucariaceae|g__Verrucariaceae_unclassified|s__Verrucariaceae_unclassified	0	0	0	0	0	0	0	0	0	0	0	0	0	0	0	0	0	0	0.00502	0	0	0	0	0	0	0	0.00718	0	0	0	0	0	54.0707	0	0	0	0	0	0	0	0.00761	0	0	0	0	0	0.03575	0	0.00857
d__Fungi|p__Ascomycota|c__Lecanoromycetes	0	0.01838	0	0	0	0	0	0	0	0	0	0	0	0	0	0	0	0	0	0	0	0	0	0	0	0.02822	0	0	0	0	0	0	0	0	0	0	0	0	0	0	0	0	0	0	0	0	0	0	0
d__Fungi|p__Ascomycota|c__Lecanoromycetes|o__Lecanorales	0	0.01838	0	0	0	0	0	0	0	0	0	0	0	0	0	0	0	0	0	0	0	0	0	0	0	0.02822	0	0	0	0	0	0	0	0	0	0	0	0	0	0	0	0	0	0	0	0	0	0	0
d__Fungi|p__Ascomycota|c__Lecanoromycetes|o__Lecanorales|f__Lecanorales_unclassified	0	0.01838	0	0	0	0	0	0	0	0	0	0	0	0	0	0	0	0	0	0	0	0	0	0	0	0.02822	0	0	0	0	0	0	0	0	0	0	0	0	0	0	0	0	0	0	0	0	0	0	0
d__Fungi|p__Ascomycota|c__Lecanoromycetes|o__Lecanorales|f__Lecanorales_unclassified|g__Lecanorales_unclassified	0	0.01838	0	0	0	0	0	0	0	0	0	0	0	0	0	0	0	0	0	0	0	0	0	0	0	0.02822	0	0	0	0	0	0	0	0	0	0	0	0	0	0	0	0	0	0	0	0	0	0	0
d__Fungi|p__Ascomycota|c__Lecanoromycetes|o__Lecanorales|f__Lecanorales_unclassified|g__Lecanorales_unclassified|s__Lecanorales_unclassified	0	0.01838	0	0	0	0	0	0	0	0	0	0	0	0	0	0	0	0	0	0	0	0	0	0	0	0.02822	0	0	0	0	0	0	0	0	0	0	0	0	0	0	0	0	0	0	0	0	0	0	0
d__Fungi|p__Ascomycota|c__Leotiomycetes	2.2255	0.57828	0	0	0	0.0228	0.00894	0	0.01581	0	0.02632	0	0.00669	0	1.4207	56.6111	40.2916	0.04953	6.70517	0.00244	0.69154	0	0.00753	0.01656	0.06531	0.42586	0	0	17.91	0	0.00605	44.4499	0.00642	0.01638	31.2227	0	0.10506	0.0104	0.09549	0	0	0	0.00618	0	17.5341	0	0.17754	0	0
d__Fungi|p__Ascomycota|c__Leotiomycetes|o__Erysiphales	0	0.00368	0	0	0	0	0	0	0	0	0	0	0	0	0	0	0	0	0	0	0	0	0	0	0	0.00641	0	0	0	0	0	0	0	0	0	0	0	0	0	0	0	0	0	0	0	0	0	0	0
d__Fungi|p__Ascomycota|c__Leotiomycetes|o__Erysiphales|f__Erysiphaceae	0	0.00368	0	0	0	0	0	0	0	0	0	0	0	0	0	0	0	0	0	0	0	0	0	0	0	0.00641	0	0	0	0	0	0	0	0	0	0	0	0	0	0	0	0	0	0	0	0	0	0	0
d__Fungi|p__Ascomycota|c__Leotiomycetes|o__Erysiphales|f__Erysiphaceae|g__Blumeria	0	0.00368	0	0	0	0	0	0	0	0	0	0	0	0	0	0	0	0	0	0	0	0	0	0	0	0.00641	0	0	0	0	0	0	0	0	0	0	0	0	0	0	0	0	0	0	0	0	0	0	0
d__Fungi|p__Ascomycota|c__Leotiomycetes|o__Erysiphales|f__Erysiphaceae|g__Blumeria|s__Blumeria_graminis	0	0.00368	0	0	0	0	0	0	0	0	0	0	0	0	0	0	0	0	0	0	0	0	0	0	0	0.00641	0	0	0	0	0	0	0	0	0	0	0	0	0	0	0	0	0	0	0	0	0	0	0
d__Fungi|p__Ascomycota|c__Leotiomycetes|o__Helotiales	2.2255	0.5746	0	0	0	0.0228	0.00894	0	0.01581	0	0.02632	0	0.00669	0	1.4207	56.6111	40.2916	0.04953	6.70517	0.00244	0.69154	0	0.00251	0.01656	0.01355	0.38482	0	0	17.91	0	0.00605	44.4499	0.00642	0.01638	31.2227	0	0.10506	0.0104	0.09549	0	0	0	0.00618	0	17.5341	0	0.07891	0	0
d__Fungi|p__Ascomycota|c__Leotiomycetes|o__Helotiales|f__Dermateaceae	0	0	0	0	0	0	0.00383	0	0	0	0.02632	0	0	0	0	0	0	0	6.70517	0.00244	0	0	0	0	0	0	0	0	0	0	0.00605	0	0	0	0	0	0	0	0	0	0	0	0	0	0	0	0	0	0
d__Fungi|p__Ascomycota|c__Leotiomycetes|o__Helotiales|f__Dermateaceae|g__Mollisia	0	0	0	0	0	0	0.00383	0	0	0	0.02632	0	0	0	0	0	0	0	6.70517	0.00244	0	0	0	0	0	0	0	0	0	0	0.00605	0	0	0	0	0	0	0	0	0	0	0	0	0	0	0	0	0	0
d__Fungi|p__Ascomycota|c__Leotiomycetes|o__Helotiales|f__Dermateaceae|g__Mollisia|s__Mollisia_cinerea	0	0	0	0	0	0	0.00383	0	0	0	0.02632	0	0	0	0	0	0	0	6.70517	0.00244	0	0	0	0	0	0	0	0	0	0	0.00605	0	0	0	0	0	0	0	0	0	0	0	0	0	0	0	0	0	0
d__Fungi|p__Ascomycota|c__Leotiomycetes|o__Helotiales|f__Geoglossaceae	0	0	0	0	0	0	0	0	0	0	0	0	0	0	0	0	0	0	0	0	0	0	0	0	0	0	0	0	0	0	0	0	0	0	0	0	0	0	0	0	0	0	0	0	0	0	0.00616	0	0
d__Fungi|p__Ascomycota|c__Leotiomycetes|o__Helotiales|f__Geoglossaceae|g__Trichoglossum	0	0	0	0	0	0	0	0	0	0	0	0	0	0	0	0	0	0	0	0	0	0	0	0	0	0	0	0	0	0	0	0	0	0	0	0	0	0	0	0	0	0	0	0	0	0	0.00616	0	0
d__Fungi|p__Ascomycota|c__Leotiomycetes|o__Helotiales|f__Geoglossaceae|g__Trichoglossum|s__Trichoglossum_hirsutum	0	0	0	0	0	0	0	0	0	0	0	0	0	0	0	0	0	0	0	0	0	0	0	0	0	0	0	0	0	0	0	0	0	0	0	0	0	0	0	0	0	0	0	0	0	0	0.00616	0	0
d__Fungi|p__Ascomycota|c__Leotiomycetes|o__Helotiales|f__Helotiaceae	0	0	0	0	0	0	0	0	0	0	0	0	0	0	0	0	0	0	0	0	0	0	0	0	0	0	0	0	0	0	0	0	0	0	0	0	0	0	0.01522	0	0	0	0	0	17.5254	0	0.03206	0	0
d__Fungi|p__Ascomycota|c__Leotiomycetes|o__Helotiales|f__Helotiaceae|g__Cadophora	0	0	0	0	0	0	0	0	0	0	0	0	0	0	0	0	0	0	0	0	0	0	0	0	0	0	0	0	0	0	0	0	0	0	0	0	0	0	0	0	0	0	0	0	0	0	0	0	0
d__Fungi|p__Ascomycota|c__Leotiomycetes|o__Helotiales|f__Helotiaceae|g__Cadophora|s__Cadophora_unclassified	0	0	0	0	0	0	0	0	0	0	0	0	0	0	0	0	0	0	0	0	0	0	0	0	0	0	0	0	0	0	0	0	0	0	0	0	0	0	0	0	0	0	0	0	0	0	0	0	0
d__Fungi|p__Ascomycota|c__Leotiomycetes|o__Helotiales|f__Helotiaceae|g__Helotiaceae_unclassified	0	0	0	0	0	0	0	0	0	0	0	0	0	0	0	0	0	0	0	0	0	0	0	0	0	0	0	0	0	0	0	0	0	0	0	0	0	0	0	0	0	0	0	0	0	0	0	0	0
d__Fungi|p__Ascomycota|c__Leotiomycetes|o__Helotiales|f__Helotiaceae|g__Helotiaceae_unclassified|s__Helotiaceae_unclassified	0	0	0	0	0	0	0	0	0	0	0	0	0	0	0	0	0	0	0	0	0	0	0	0	0	0	0	0	0	0	0	0	0	0	0	0	0	0	0	0	0	0	0	0	0	0	0	0	0
d__Fungi|p__Ascomycota|c__Leotiomycetes|o__Helotiales|f__Helotiaceae|g__Leptodontidium	0	0	0	0	0	0	0	0	0	0	0	0	0	0	0	0	0	0	0	0	0	0	0	0	0	0	0	0	0	0	0	0	0	0	0	0	0	0	0.01522	0	0	0	0	0	17.5254	0	0.0111	0	0
d__Fungi|p__Ascomycota|c__Leotiomycetes|o__Helotiales|f__Helotiaceae|g__Leptodontidium|s__Leptodontidium_orchidicola	0	0	0	0	0	0	0	0	0	0	0	0	0	0	0	0	0	0	0	0	0	0	0	0	0	0	0	0	0	0	0	0	0	0	0	0	0	0	0.01522	0	0	0	0	0	17.5254	0	0.0111	0	0
d__Fungi|p__Ascomycota|c__Leotiomycetes|o__Helotiales|f__Helotiaceae|g__Leptodontidium|s__uncultured_Protoventuria	0	0	0	0	0	0	0	0	0	0	0	0	0	0	0	0	0	0	0	0	0	0	0	0	0	0	0	0	0	0	0	0	0	0	0	0	0	0	0	0	0	0	0	0	0	0	0	0	0
d__Fungi|p__Ascomycota|c__Leotiomycetes|o__Helotiales|f__Helotiaceae|g__Pezoloma	0	0	0	0	0	0	0	0	0	0	0	0	0	0	0	0	0	0	0	0	0	0	0	0	0	0	0	0	0	0	0	0	0	0	0	0	0	0	0	0	0	0	0	0	0	0	0.00986	0	0
d__Fungi|p__Ascomycota|c__Leotiomycetes|o__Helotiales|f__Helotiaceae|g__Pezoloma|s__Cadophora_finlandica	0	0	0	0	0	0	0	0	0	0	0	0	0	0	0	0	0	0	0	0	0	0	0	0	0	0	0	0	0	0	0	0	0	0	0	0	0	0	0	0	0	0	0	0	0	0	0.00986	0	0
d__Fungi|p__Ascomycota|c__Leotiomycetes|o__Helotiales|f__Helotiaceae|g__Tricladium	0	0	0	0	0	0	0	0	0	0	0	0	0	0	0	0	0	0	0	0	0	0	0	0	0	0	0	0	0	0	0	0	0	0	0	0	0	0	0	0	0	0	0	0	0	0	0.0111	0	0
d__Fungi|p__Ascomycota|c__Leotiomycetes|o__Helotiales|f__Helotiaceae|g__Tricladium|s__Zalerion_varium	0	0	0	0	0	0	0	0	0	0	0	0	0	0	0	0	0	0	0	0	0	0	0	0	0	0	0	0	0	0	0	0	0	0	0	0	0	0	0	0	0	0	0	0	0	0	0.0111	0	0
d__Fungi|p__Ascomycota|c__Leotiomycetes|o__Helotiales|f__Helotiales_Incertae_sedis	0	0	0	0	0	0	0	0	0	0	0	0	0	0	0	0	0	0	0	0	0	0	0	0	0	0	0	0	0	0	0	0	0	0	0	0	0	0	0	0	0	0	0	0	0	0	0.02713	0	0
d__Fungi|p__Ascomycota|c__Leotiomycetes|o__Helotiales|f__Helotiales_Incertae_sedis|g__Tetracladium	0	0	0	0	0	0	0	0	0	0	0	0	0	0	0	0	0	0	0	0	0	0	0	0	0	0	0	0	0	0	0	0	0	0	0	0	0	0	0	0	0	0	0	0	0	0	0.02713	0	0
d__Fungi|p__Ascomycota|c__Leotiomycetes|o__Helotiales|f__Helotiales_Incertae_sedis|g__Tetracladium|s__Tetracladium_furcatum	0	0	0	0	0	0	0	0	0	0	0	0	0	0	0	0	0	0	0	0	0	0	0	0	0	0	0	0	0	0	0	0	0	0	0	0	0	0	0	0	0	0	0	0	0	0	0	0	0
d__Fungi|p__Ascomycota|c__Leotiomycetes|o__Helotiales|f__Helotiales_Incertae_sedis|g__Tetracladium|s__Tetracladium_maxilliforme	0	0	0	0	0	0	0	0	0	0	0	0	0	0	0	0	0	0	0	0	0	0	0	0	0	0	0	0	0	0	0	0	0	0	0	0	0	0	0	0	0	0	0	0	0	0	0.01973	0	0
d__Fungi|p__Ascomycota|c__Leotiomycetes|o__Helotiales|f__Helotiales_Incertae_sedis|g__Tetracladium|s__Tetracladium_sp_WMM_2012a	0	0	0	0	0	0	0	0	0	0	0	0	0	0	0	0	0	0	0	0	0	0	0	0	0	0	0	0	0	0	0	0	0	0	0	0	0	0	0	0	0	0	0	0	0	0	0	0	0
d__Fungi|p__Ascomycota|c__Leotiomycetes|o__Helotiales|f__Helotiales_Incertae_sedis|g__Tetracladium|s__Tetracladium_unclassified	0	0	0	0	0	0	0	0	0	0	0	0	0	0	0	0	0	0	0	0	0	0	0	0	0	0	0	0	0	0	0	0	0	0	0	0	0	0	0	0	0	0	0	0	0	0	0.0074	0	0
d__Fungi|p__Ascomycota|c__Leotiomycetes|o__Helotiales|f__Helotiales_fam_Incertae_sedis	0	0	0	0	0	0	0	0	0	0	0	0	0	0	0	0	0	0	0	0	0	0	0	0	0	0	0	0	0	0	0	0	0	0	0	0	0	0	0	0	0	0	0	0	0	0	0	0	0
d__Fungi|p__Ascomycota|c__Leotiomycetes|o__Helotiales|f__Helotiales_fam_Incertae_sedis|g__Acidomelania	0	0	0	0	0	0	0	0	0	0	0	0	0	0	0	0	0	0	0	0	0	0	0	0	0	0	0	0	0	0	0	0	0	0	0	0	0	0	0	0	0	0	0	0	0	0	0	0	0
d__Fungi|p__Ascomycota|c__Leotiomycetes|o__Helotiales|f__Helotiales_fam_Incertae_sedis|g__Acidomelania|s__Acidomelania_panicicola	0	0	0	0	0	0	0	0	0	0	0	0	0	0	0	0	0	0	0	0	0	0	0	0	0	0	0	0	0	0	0	0	0	0	0	0	0	0	0	0	0	0	0	0	0	0	0	0	0
d__Fungi|p__Ascomycota|c__Leotiomycetes|o__Helotiales|f__Helotiales_unclassified	0.22956	0	0	0	0	0	0	0	0	0	0	0	0	0	0.16378	6.43844	0.00496	0	0	0	0	0	0	0	0	0	0	0	0.00528	0	0	0	0	0	0	0	0.00914	0	0	0	0	0	0	0	0	0	0.01356	0	0
d__Fungi|p__Ascomycota|c__Leotiomycetes|o__Helotiales|f__Helotiales_unclassified|g__Helotiales_unclassified	0.22956	0	0	0	0	0	0	0	0	0	0	0	0	0	0.16378	6.43844	0.00496	0	0	0	0	0	0	0	0	0	0	0	0.00528	0	0	0	0	0	0	0	0.00914	0	0	0	0	0	0	0	0	0	0.01356	0	0
d__Fungi|p__Ascomycota|c__Leotiomycetes|o__Helotiales|f__Helotiales_unclassified|g__Helotiales_unclassified|s__Helotiales_unclassified	0.22956	0	0	0	0	0	0	0	0	0	0	0	0	0	0.16378	6.43844	0.00496	0	0	0	0	0	0	0	0	0	0	0	0.00528	0	0	0	0	0	0	0	0.00914	0	0	0	0	0	0	0	0	0	0.01356	0	0
d__Fungi|p__Ascomycota|c__Leotiomycetes|o__Helotiales|f__Hyaloscyphaceae	0.43374	0	0	0	0	0.0076	0	0	0.00608	0	0	0	0	0	0.33501	12.5669	40.278	0.03027	0	0	0.69154	0	0	0	0	0	0	0	0.00792	0	0	0.0586	0	0	0	0	0.02132	0	0.02768	0	0	0	0	0	0.00872	0	0	0	0
d__Fungi|p__Ascomycota|c__Leotiomycetes|o__Helotiales|f__Hyaloscyphaceae|g__Lachnum	0.43374	0	0	0	0	0.0076	0	0	0.00608	0	0	0	0	0	0.33501	12.5669	40.278	0.03027	0	0	0.69154	0	0	0	0	0	0	0	0.00792	0	0	0.0586	0	0	0	0	0.02132	0	0.02768	0	0	0	0	0	0.00872	0	0	0	0
d__Fungi|p__Ascomycota|c__Leotiomycetes|o__Helotiales|f__Hyaloscyphaceae|g__Lachnum|s__Lachnum_virgineum	0.43374	0	0	0	0	0.0076	0	0	0.00608	0	0	0	0	0	0.33501	12.5669	40.278	0.03027	0	0	0.69154	0	0	0	0	0	0	0	0.00792	0	0	0.0586	0	0	0	0	0.02132	0	0.02768	0	0	0	0	0	0.00872	0	0	0	0
d__Fungi|p__Ascomycota|c__Leotiomycetes|o__Helotiales|f__Leotiaceae	0	0	0	0	0	0	0	0	0	0	0	0	0	0	0	0	0	0	0	0	0	0	0	0	0.00246	0	0	0	0	0	0	0	0	0	0	0	0	0	0	0	0	0	0	0	0	0	0	0	0
d__Fungi|p__Ascomycota|c__Leotiomycetes|o__Helotiales|f__Leotiaceae|g__Alatospora	0	0	0	0	0	0	0	0	0	0	0	0	0	0	0	0	0	0	0	0	0	0	0	0	0.00246	0	0	0	0	0	0	0	0	0	0	0	0	0	0	0	0	0	0	0	0	0	0	0	0
d__Fungi|p__Ascomycota|c__Leotiomycetes|o__Helotiales|f__Leotiaceae|g__Alatospora|s__Alatospora_pulchella	0	0	0	0	0	0	0	0	0	0	0	0	0	0	0	0	0	0	0	0	0	0	0	0	0.00246	0	0	0	0	0	0	0	0	0	0	0	0	0	0	0	0	0	0	0	0	0	0	0	0
d__Fungi|p__Ascomycota|c__Leotiomycetes|o__Helotiales|f__Leotiaceae|g__Pezoloma	0	0	0	0	0	0	0	0	0	0	0	0	0	0	0	0	0	0	0	0	0	0	0	0	0	0	0	0	0	0	0	0	0	0	0	0	0	0	0	0	0	0	0	0	0	0	0	0	0
d__Fungi|p__Ascomycota|c__Leotiomycetes|o__Helotiales|f__Leotiaceae|g__Pezoloma|s__Pezoloma_ericae	0	0	0	0	0	0	0	0	0	0	0	0	0	0	0	0	0	0	0	0	0	0	0	0	0	0	0	0	0	0	0	0	0	0	0	0	0	0	0	0	0	0	0	0	0	0	0	0	0
d__Fungi|p__Ascomycota|c__Leotiomycetes|o__Helotiales|f__Sclerotiniaceae	0.42045	0.5746	0	0	0	0.0076	0	0	0	0	0	0	0	0	0.24816	11.7754	0.00496	0.01238	0	0	0	0	0.00251	0	0.01109	0.38482	0	0	0.01452	0	0	0	0	0	0	0	0.02436	0	0	0	0	0	0	0	0	0	0	0	0
d__Fungi|p__Ascomycota|c__Leotiomycetes|o__Helotiales|f__Sclerotiniaceae|g__Botryotinia	0.42045	0.5746	0	0	0	0.0076	0	0	0	0	0	0	0	0	0.24816	11.7754	0.00496	0.01238	0	0	0	0	0.00251	0	0.01109	0.38482	0	0	0.01452	0	0	0	0	0	0	0	0.02436	0	0	0	0	0	0	0	0	0	0	0	0
d__Fungi|p__Ascomycota|c__Leotiomycetes|o__Helotiales|f__Sclerotiniaceae|g__Botryotinia|s__Botryotinia_unclassified	0	0.5746	0	0	0	0	0	0	0	0	0	0	0	0	0	0.01094	0	0	0	0	0	0	0.00251	0	0.01109	0.38482	0	0	0	0	0	0	0	0	0	0	0	0	0	0	0	0	0	0	0	0	0	0	0
d__Fungi|p__Ascomycota|c__Leotiomycetes|o__Helotiales|f__Sclerotiniaceae|g__Botryotinia|s__Botrytis_caroliniana	0.42045	0	0	0	0	0.0076	0	0	0	0	0	0	0	0	0.24816	11.7645	0.00496	0.01238	0	0	0	0	0	0	0	0	0	0	0.01452	0	0	0	0	0	0	0	0.02436	0	0	0	0	0	0	0	0	0	0	0	0
d__Fungi|p__Ascomycota|c__Leotiomycetes|o__Helotiales|f__Vibrisseaceae	1.14175	0	0	0	0	0.0076	0.00511	0	0.00973	0	0	0	0.00669	0	0.67375	25.8303	0.00372	0.00688	0	0	0	0	0	0.01656	0	0	0	0	17.8823	0	0	44.3913	0.00642	0.01638	31.2227	0	0.05024	0.0104	0.05259	0	0	0	0.00618	0	0	0	0	0	0
d__Fungi|p__Ascomycota|c__Leotiomycetes|o__Helotiales|f__Vibrisseaceae|g__Phialocephala	1.14175	0	0	0	0	0.0076	0.00511	0	0.00973	0	0	0	0.00669	0	0.67375	25.8303	0.00372	0.00688	0	0	0	0	0	0.01656	0	0	0	0	17.8823	0	0	44.3913	0.00642	0.01638	31.2227	0	0.05024	0.0104	0.05259	0	0	0	0.00618	0	0	0	0	0	0
d__Fungi|p__Ascomycota|c__Leotiomycetes|o__Helotiales|f__Vibrisseaceae|g__Phialocephala|s__Phialocephala_unclassified	1.14175	0	0	0	0	0.0076	0.00511	0	0.00973	0	0	0	0.00669	0	0.67375	25.8303	0.00372	0.00688	0	0	0	0	0	0.01656	0	0	0	0	17.8823	0	0	44.3913	0.00642	0.01638	31.2227	0	0.05024	0.0104	0.05259	0	0	0	0.00618	0	0	0	0	0	0
d__Fungi|p__Ascomycota|c__Leotiomycetes|o__Leotiomycetes_Incertae_sedis	0	0	0	0	0	0	0	0	0	0	0	0	0	0	0	0	0	0	0	0	0	0	0	0	0	0	0	0	0	0	0	0	0	0	0	0	0	0	0	0	0	0	0	0	0	0	0.01603	0	0
d__Fungi|p__Ascomycota|c__Leotiomycetes|o__Leotiomycetes_Incertae_sedis|f__Leotiomycetes_Incertae_sedis	0	0	0	0	0	0	0	0	0	0	0	0	0	0	0	0	0	0	0	0	0	0	0	0	0	0	0	0	0	0	0	0	0	0	0	0	0	0	0	0	0	0	0	0	0	0	0.01603	0	0
d__Fungi|p__Ascomycota|c__Leotiomycetes|o__Leotiomycetes_Incertae_sedis|f__Leotiomycetes_Incertae_sedis|g__Geomyces	0	0	0	0	0	0	0	0	0	0	0	0	0	0	0	0	0	0	0	0	0	0	0	0	0	0	0	0	0	0	0	0	0	0	0	0	0	0	0	0	0	0	0	0	0	0	0.01603	0	0
d__Fungi|p__Ascomycota|c__Leotiomycetes|o__Leotiomycetes_Incertae_sedis|f__Leotiomycetes_Incertae_sedis|g__Geomyces|s__Geomyces_pannorum_var_asperulatus	0	0	0	0	0	0	0	0	0	0	0	0	0	0	0	0	0	0	0	0	0	0	0	0	0	0	0	0	0	0	0	0	0	0	0	0	0	0	0	0	0	0	0	0	0	0	0.01603	0	0
d__Fungi|p__Ascomycota|c__Leotiomycetes|o__Leotiomycetes_unclassified	0	0	0	0	0	0	0	0	0	0	0	0	0	0	0	0	0	0	0	0	0	0	0	0	0	0	0	0	0	0	0	0	0	0	0	0	0	0	0	0	0	0	0	0	0	0	0.01356	0	0
d__Fungi|p__Ascomycota|c__Leotiomycetes|o__Leotiomycetes_unclassified|f__Leotiomycetes_unclassified	0	0	0	0	0	0	0	0	0	0	0	0	0	0	0	0	0	0	0	0	0	0	0	0	0	0	0	0	0	0	0	0	0	0	0	0	0	0	0	0	0	0	0	0	0	0	0.01356	0	0
d__Fungi|p__Ascomycota|c__Leotiomycetes|o__Leotiomycetes_unclassified|f__Leotiomycetes_unclassified|g__Leotiomycetes_unclassified	0	0	0	0	0	0	0	0	0	0	0	0	0	0	0	0	0	0	0	0	0	0	0	0	0	0	0	0	0	0	0	0	0	0	0	0	0	0	0	0	0	0	0	0	0	0	0.01356	0	0
d__Fungi|p__Ascomycota|c__Leotiomycetes|o__Leotiomycetes_unclassified|f__Leotiomycetes_unclassified|g__Leotiomycetes_unclassified|s__Leotiomycetes_unclassified	0	0	0	0	0	0	0	0	0	0	0	0	0	0	0	0	0	0	0	0	0	0	0	0	0	0	0	0	0	0	0	0	0	0	0	0	0	0	0	0	0	0	0	0	0	0	0.01356	0	0
d__Fungi|p__Ascomycota|c__Leotiomycetes|o__Thelebolales	0	0	0	0	0	0	0	0	0	0	0	0	0	0	0	0	0	0	0	0	0	0	0.00502	0	0.05176	0.03463	0	0	0	0	0	0	0	0	0	0	0	0	0	0	0	0	0	0	0	0	0.06904	0	0
d__Fungi|p__Ascomycota|c__Leotiomycetes|o__Thelebolales|f__Pseudeurotiaceae	0	0	0	0	0	0	0	0	0	0	0	0	0	0	0	0	0	0	0	0	0	0	0.00502	0	0.05176	0.03463	0	0	0	0	0	0	0	0	0	0	0	0	0	0	0	0	0	0	0	0	0.01356	0	0
d__Fungi|p__Ascomycota|c__Leotiomycetes|o__Thelebolales|f__Pseudeurotiaceae|g__Pseudeurotiaceae_unclassified	0	0	0	0	0	0	0	0	0	0	0	0	0	0	0	0	0	0	0	0	0	0	0.00502	0	0.05176	0.03463	0	0	0	0	0	0	0	0	0	0	0	0	0	0	0	0	0	0	0	0	0.01356	0	0
d__Fungi|p__Ascomycota|c__Leotiomycetes|o__Thelebolales|f__Pseudeurotiaceae|g__Pseudeurotiaceae_unclassified|s__Pseudeurotiaceae_unclassified	0	0	0	0	0	0	0	0	0	0	0	0	0	0	0	0	0	0	0	0	0	0	0.00502	0	0.05176	0.03463	0	0	0	0	0	0	0	0	0	0	0	0	0	0	0	0	0	0	0	0	0.01356	0	0
d__Fungi|p__Ascomycota|c__Leotiomycetes|o__Thelebolales|f__Thelebolaceae	0	0	0	0	0	0	0	0	0	0	0	0	0	0	0	0	0	0	0	0	0	0	0	0	0	0	0	0	0	0	0	0	0	0	0	0	0	0	0	0	0	0	0	0	0	0	0.05548	0	0
d__Fungi|p__Ascomycota|c__Leotiomycetes|o__Thelebolales|f__Thelebolaceae|g__Thelebolus	0	0	0	0	0	0	0	0	0	0	0	0	0	0	0	0	0	0	0	0	0	0	0	0	0	0	0	0	0	0	0	0	0	0	0	0	0	0	0	0	0	0	0	0	0	0	0.05548	0	0
d__Fungi|p__Ascomycota|c__Leotiomycetes|o__Thelebolales|f__Thelebolaceae|g__Thelebolus|s__Thelebolus_globosus	0	0	0	0	0	0	0	0	0	0	0	0	0	0	0	0	0	0	0	0	0	0	0	0	0	0	0	0	0	0	0	0	0	0	0	0	0	0	0	0	0	0	0	0	0	0	0.05548	0	0
d__Fungi|p__Ascomycota|c__Orbiliomycetes	0	0	0	0	0	0	0	0	0	0	0	0.0026	0	0	0	0	0	0	0	0	0	0	0	0	0	0	0	0	0	0	0	0	0	0	0	0	0	0	0	0	0	0	0	0	0	0	0	0	0
d__Fungi|p__Ascomycota|c__Orbiliomycetes|o__Orbiliales	0	0	0	0	0	0	0	0	0	0	0	0.0026	0	0	0	0	0	0	0	0	0	0	0	0	0	0	0	0	0	0	0	0	0	0	0	0	0	0	0	0	0	0	0	0	0	0	0	0	0
d__Fungi|p__Ascomycota|c__Orbiliomycetes|o__Orbiliales|f__Orbiliaceae	0	0	0	0	0	0	0	0	0	0	0	0.0026	0	0	0	0	0	0	0	0	0	0	0	0	0	0	0	0	0	0	0	0	0	0	0	0	0	0	0	0	0	0	0	0	0	0	0	0	0
d__Fungi|p__Ascomycota|c__Orbiliomycetes|o__Orbiliales|f__Orbiliaceae|g__Hyalorbilia	0	0	0	0	0	0	0	0	0	0	0	0.0026	0	0	0	0	0	0	0	0	0	0	0	0	0	0	0	0	0	0	0	0	0	0	0	0	0	0	0	0	0	0	0	0	0	0	0	0	0
d__Fungi|p__Ascomycota|c__Orbiliomycetes|o__Orbiliales|f__Orbiliaceae|g__Hyalorbilia|s__Hyalorbilia_juliae	0	0	0	0	0	0	0	0	0	0	0	0.0026	0	0	0	0	0	0	0	0	0	0	0	0	0	0	0	0	0	0	0	0	0	0	0	0	0	0	0	0	0	0	0	0	0	0	0	0	0
d__Fungi|p__Ascomycota|c__Pezizomycetes	12.1134	0	0.00778	0.01582	0.00384	6.9218	0.00511	0.00503	0	0	9.59399	0.00649	0.00268	0	0	0	0	0.00275	0.01256	0.01461	0	0.01615	0.02638	0	0.01849	0.06543	0.00599	0	0	0	0.00242	0	0.01413	0.0126	0.0025	0	0	0.0039	0	0	0.01522	0.03477	0	0.0037	0	0	34.1088	0	0.00286
d__Fungi|p__Ascomycota|c__Pezizomycetes|o__Pezizales	12.1134	0	0.00778	0.01582	0.00384	6.9218	0.00511	0.00503	0	0	9.59399	0.00649	0.00268	0	0	0	0	0.00275	0.01256	0.01461	0	0.01615	0.02638	0	0.01849	0.06543	0.00599	0	0	0	0.00242	0	0.01413	0.0126	0.0025	0	0	0.0039	0	0	0.01522	0.03477	0	0.0037	0	0	34.1088	0	0.00286
d__Fungi|p__Ascomycota|c__Pezizomycetes|o__Pezizales|f__Ascobolaceae	12.1134	0	0	0.00365	0	0	0	0	0	0	0	0	0.00268	0	0	0	0	0	0	0	0	0	0	0	0	0	0	0	0	0	0	0	0	0	0	0	0	0	0	0	0	0	0	0	0	0	0	0	0
d__Fungi|p__Ascomycota|c__Pezizomycetes|o__Pezizales|f__Ascobolaceae|g__Ascobolus	12.1134	0	0	0.00365	0	0	0	0	0	0	0	0	0.00268	0	0	0	0	0	0	0	0	0	0	0	0	0	0	0	0	0	0	0	0	0	0	0	0	0	0	0	0	0	0	0	0	0	0	0	0
d__Fungi|p__Ascomycota|c__Pezizomycetes|o__Pezizales|f__Ascobolaceae|g__Ascobolus|s__Ascobolus_unclassified	12.1134	0	0	0.00365	0	0	0	0	0	0	0	0	0.00268	0	0	0	0	0	0	0	0	0	0	0	0	0	0	0	0	0	0	0	0	0	0	0	0	0	0	0	0	0	0	0	0	0	0	0	0
d__Fungi|p__Ascomycota|c__Pezizomycetes|o__Pezizales|f__Ascodesmidaceae	0	0	0	0	0	0	0	0	0	0	0	0	0	0	0	0	0	0	0	0	0	0	0	0	0	0	0	0	0	0	0	0	0	0	0	0	0	0	0	0	0	0	0	0	0	0	0	0	0
d__Fungi|p__Ascomycota|c__Pezizomycetes|o__Pezizales|f__Ascodesmidaceae|g__Cephaliophora	0	0	0	0	0	0	0	0	0	0	0	0	0	0	0	0	0	0	0	0	0	0	0	0	0	0	0	0	0	0	0	0	0	0	0	0	0	0	0	0	0	0	0	0	0	0	0	0	0
d__Fungi|p__Ascomycota|c__Pezizomycetes|o__Pezizales|f__Ascodesmidaceae|g__Cephaliophora|s__Cephaliophora_unclassified	0	0	0	0	0	0	0	0	0	0	0	0	0	0	0	0	0	0	0	0	0	0	0	0	0	0	0	0	0	0	0	0	0	0	0	0	0	0	0	0	0	0	0	0	0	0	0	0	0
d__Fungi|p__Ascomycota|c__Pezizomycetes|o__Pezizales|f__Pyronemataceae	0	0	0.00778	0.01217	0.00384	6.9218	0.00511	0.00503	0	0	9.59399	0.00649	0	0	0	0	0	0.00275	0.01256	0.01461	0	0.01615	0.02638	0	0.01849	0.06543	0.00599	0	0	0	0.00242	0	0.01413	0.0126	0.0025	0	0	0.0039	0	0	0.01522	0.03477	0	0.0037	0	0	34.1088	0	0.00286
d__Fungi|p__Ascomycota|c__Pezizomycetes|o__Pezizales|f__Pyronemataceae|g__Aleuria	0	0	0	0	0	6.9218	0	0	0	0	0	0	0	0	0	0	0	0.00275	0	0	0	0	0.00377	0	0	0	0	0	0	0	0	0	0.00771	0.0126	0	0	0	0.0039	0	0	0	0.03477	0	0	0	0	12.0625	0	0.00286
d__Fungi|p__Ascomycota|c__Pezizomycetes|o__Pezizales|f__Pyronemataceae|g__Aleuria|s__Aleuria_aurantia	0	0	0	0	0	6.9218	0	0	0	0	0	0	0	0	0	0	0	0.00275	0	0	0	0	0.00377	0	0	0	0	0	0	0	0	0	0.00771	0.0126	0	0	0	0.0039	0	0	0	0.03477	0	0	0	0	12.0625	0	0.00286
d__Fungi|p__Ascomycota|c__Pezizomycetes|o__Pezizales|f__Pyronemataceae|g__Byssonectria	0	0	0	0	0	0	0	0	0	0	0	0	0	0	0	0	0	0	0	0	0	0	0	0	0	0.00257	0	0	0	0	0	0	0	0	0	0	0	0	0	0	0	0	0	0	0	0	0.13685	0	0
d__Fungi|p__Ascomycota|c__Pezizomycetes|o__Pezizales|f__Pyronemataceae|g__Byssonectria|s__Byssonectria_deformis	0	0	0	0	0	0	0	0	0	0	0	0	0	0	0	0	0	0	0	0	0	0	0	0	0	0.00257	0	0	0	0	0	0	0	0	0	0	0	0	0	0	0	0	0	0	0	0	0.13685	0	0
d__Fungi|p__Ascomycota|c__Pezizomycetes|o__Pezizales|f__Pyronemataceae|g__Kotlabaea	0	0	0.00778	0.01217	0.00384	0	0.00511	0.00503	0	0	9.59399	0.00649	0	0	0	0	0	0	0.01256	0.01461	0	0.01615	0.00251	0	0	0.00257	0.00599	0	0	0	0.00242	0	0.00642	0	0.0025	0	0	0	0	0	0.01522	0	0	0.0037	0	0	0.0074	0	0
d__Fungi|p__Ascomycota|c__Pezizomycetes|o__Pezizales|f__Pyronemataceae|g__Kotlabaea|s__Kotlabaea_unclassified	0	0	0.00778	0.01217	0.00384	0	0.00511	0.00503	0	0	9.59399	0.00649	0	0	0	0	0	0	0.01256	0.01461	0	0.01615	0.00251	0	0	0.00257	0.00599	0	0	0	0.00242	0	0.00642	0	0.0025	0	0	0	0	0	0.01522	0	0	0.0037	0	0	0.0074	0	0
d__Fungi|p__Ascomycota|c__Pezizomycetes|o__Pezizales|f__Pyronemataceae|g__Lamprospora	0	0	0	0	0	0	0	0	0	0	0	0	0	0	0	0	0	0	0	0	0	0	0.01382	0	0.01109	0.00641	0	0	0	0	0	0	0	0	0	0	0	0	0	0	0	0	0	0	0	0	0.0037	0	0
d__Fungi|p__Ascomycota|c__Pezizomycetes|o__Pezizales|f__Pyronemataceae|g__Lamprospora|s__Lamprospora_kristiansenii	0	0	0	0	0	0	0	0	0	0	0	0	0	0	0	0	0	0	0	0	0	0	0.01382	0	0.01109	0.00641	0	0	0	0	0	0	0	0	0	0	0	0	0	0	0	0	0	0	0	0	0.0037	0	0
d__Fungi|p__Ascomycota|c__Pezizomycetes|o__Pezizales|f__Pyronemataceae|g__Otidea	0	0	0	0	0	0	0	0	0	0	0	0	0	0	0	0	0	0	0	0	0	0	0	0	0.0037	0	0	0	0	0	0	0	0	0	0	0	0	0	0	0	0	0	0	0	0	0	0	0	0
d__Fungi|p__Ascomycota|c__Pezizomycetes|o__Pezizales|f__Pyronemataceae|g__Otidea|s__Otidea_unclassified	0	0	0	0	0	0	0	0	0	0	0	0	0	0	0	0	0	0	0	0	0	0	0	0	0.0037	0	0	0	0	0	0	0	0	0	0	0	0	0	0	0	0	0	0	0	0	0	0	0	0
d__Fungi|p__Ascomycota|c__Pezizomycetes|o__Pezizales|f__Pyronemataceae|g__Pseudaleuria	0	0	0	0	0	0	0	0	0	0	0	0	0	0	0	0	0	0	0	0	0	0	0	0	0	0.00257	0	0	0	0	0	0	0	0	0	0	0	0	0	0	0	0	0	0	0	0	5.76247	0	0
d__Fungi|p__Ascomycota|c__Pezizomycetes|o__Pezizales|f__Pyronemataceae|g__Pseudaleuria|s__Pseudaleuria_unclassified	0	0	0	0	0	0	0	0	0	0	0	0	0	0	0	0	0	0	0	0	0	0	0	0	0	0.00257	0	0	0	0	0	0	0	0	0	0	0	0	0	0	0	0	0	0	0	0	5.76247	0	0
d__Fungi|p__Ascomycota|c__Pezizomycetes|o__Pezizales|f__Pyronemataceae|g__Pyronemataceae_unclassified	0	0	0	0	0	0	0	0	0	0	0	0	0	0	0	0	0	0	0	0	0	0	0.00628	0	0	0	0	0	0	0	0	0	0	0	0	0	0	0	0	0	0	0	0	0	0	0	0	0	0
d__Fungi|p__Ascomycota|c__Pezizomycetes|o__Pezizales|f__Pyronemataceae|g__Pyronemataceae_unclassified|s__Pyronemataceae_unclassified	0	0	0	0	0	0	0	0	0	0	0	0	0	0	0	0	0	0	0	0	0	0	0.00628	0	0	0	0	0	0	0	0	0	0	0	0	0	0	0	0	0	0	0	0	0	0	0	0	0	0
d__Fungi|p__Ascomycota|c__Pezizomycetes|o__Pezizales|f__Pyronemataceae|g__Scutellinia	0	0	0	0	0	0	0	0	0	0	0	0	0	0	0	0	0	0	0	0	0	0	0	0	0.0037	0.05131	0	0	0	0	0	0	0	0	0	0	0	0	0	0	0	0	0	0	0	0	16.1322	0	0
d__Fungi|p__Ascomycota|c__Pezizomycetes|o__Pezizales|f__Pyronemataceae|g__Scutellinia|s__Scutellinia_crinita	0	0	0	0	0	0	0	0	0	0	0	0	0	0	0	0	0	0	0	0	0	0	0	0	0	0	0	0	0	0	0	0	0	0	0	0	0	0	0	0	0	0	0	0	0	0	0	0	0
d__Fungi|p__Ascomycota|c__Pezizomycetes|o__Pezizales|f__Pyronemataceae|g__Scutellinia|s__Scutellinia_scutellata	0	0	0	0	0	0	0	0	0	0	0	0	0	0	0	0	0	0	0	0	0	0	0	0	0.0037	0.0449	0	0	0	0	0	0	0	0	0	0	0	0	0	0	0	0	0	0	0	0	16.0237	0	0
d__Fungi|p__Ascomycota|c__Pezizomycetes|o__Pezizales|f__Pyronemataceae|g__Scutellinia|s__Scutellinia_subhirtella	0	0	0	0	0	0	0	0	0	0	0	0	0	0	0	0	0	0	0	0	0	0	0	0	0	0	0	0	0	0	0	0	0	0	0	0	0	0	0	0	0	0	0	0	0	0	0.00986	0	0
d__Fungi|p__Ascomycota|c__Pezizomycetes|o__Pezizales|f__Pyronemataceae|g__Scutellinia|s__Scutellinia_unclassified	0	0	0	0	0	0	0	0	0	0	0	0	0	0	0	0	0	0	0	0	0	0	0	0	0	0.00641	0	0	0	0	0	0	0	0	0	0	0	0	0	0	0	0	0	0	0	0	0.09863	0	0
d__Fungi|p__Ascomycota|c__Pezizomycetes|o__Pezizales|f__Pyronemataceae|g__Wilcoxina	0	0	0	0	0	0	0	0	0	0	0	0	0	0	0	0	0	0	0	0	0	0	0	0	0	0	0	0	0	0	0	0	0	0	0	0	0	0	0	0	0	0	0	0	0	0	0.0037	0	0
d__Fungi|p__Ascomycota|c__Pezizomycetes|o__Pezizales|f__Pyronemataceae|g__Wilcoxina|s__Wilcoxina_mikolae	0	0	0	0	0	0	0	0	0	0	0	0	0	0	0	0	0	0	0	0	0	0	0	0	0	0	0	0	0	0	0	0	0	0	0	0	0	0	0	0	0	0	0	0	0	0	0.0037	0	0
d__Fungi|p__Ascomycota|c__Pezizomycetes|o__Pezizales|f__Sarcosomataceae	0	0	0	0	0	0	0	0	0	0	0	0	0	0	0	0	0	0	0	0	0	0	0	0	0	0	0	0	0	0	0	0	0	0	0	0	0	0	0	0	0	0	0	0	0	0	0	0	0
d__Fungi|p__Ascomycota|c__Pezizomycetes|o__Pezizales|f__Sarcosomataceae|g__Urnula	0	0	0	0	0	0	0	0	0	0	0	0	0	0	0	0	0	0	0	0	0	0	0	0	0	0	0	0	0	0	0	0	0	0	0	0	0	0	0	0	0	0	0	0	0	0	0	0	0
d__Fungi|p__Ascomycota|c__Pezizomycetes|o__Pezizales|f__Sarcosomataceae|g__Urnula|s__Urnula_craterium	0	0	0	0	0	0	0	0	0	0	0	0	0	0	0	0	0	0	0	0	0	0	0	0	0	0	0	0	0	0	0	0	0	0	0	0	0	0	0	0	0	0	0	0	0	0	0	0	0
d__Fungi|p__Ascomycota|c__Pezizomycotina_Incertae_sedis	0	0	0.02076	0	0	0.00456	0.01405	0	0	0	0.00359	0	0.00268	1.05555	0.00372	0	0	3.62273	0	0	0	0	0.00251	0.08519	0.01109	0.00385	0	0	0.05808	0	0	0.06817	0	0	0	0	0	0	0	0.22049	0.0038	0	0	0	0	0	0.50055	0	0.19284
d__Fungi|p__Ascomycota|c__Pezizomycotina_Incertae_sedis|o__Pezizomycotina_Incertae_sedis	0	0	0.02076	0	0	0.00456	0.01405	0	0	0	0.00359	0	0.00268	1.05555	0.00372	0	0	3.62273	0	0	0	0	0.00251	0.08519	0.01109	0.00385	0	0	0.05808	0	0	0.06817	0	0	0	0	0	0	0	0.22049	0.0038	0	0	0	0	0	0.50055	0	0.19284
d__Fungi|p__Ascomycota|c__Pezizomycotina_Incertae_sedis|o__Pezizomycotina_Incertae_sedis|f__Pezizomycotina_Incertae_sedis	0	0	0.02076	0	0	0.00456	0.01405	0	0	0	0.00359	0	0.00268	1.05555	0.00372	0	0	3.62273	0	0	0	0	0.00251	0.08519	0.01109	0.00385	0	0	0.05808	0	0	0.06817	0	0	0	0	0	0	0	0.22049	0.0038	0	0	0	0	0	0.50055	0	0.19284
d__Fungi|p__Ascomycota|c__Pezizomycotina_Incertae_sedis|o__Pezizomycotina_Incertae_sedis|f__Pezizomycotina_Incertae_sedis|g__Acrophialophora	0	0	0	0	0	0	0	0	0	0	0	0	0	0	0	0	0	0	0	0	0	0	0.00251	0	0	0	0	0	0	0	0	0.00957	0	0	0	0	0	0	0	0	0	0	0	0	0	0	0	0	0
d__Fungi|p__Ascomycota|c__Pezizomycotina_Incertae_sedis|o__Pezizomycotina_Incertae_sedis|f__Pezizomycotina_Incertae_sedis|g__Acrophialophora|s__Acrophialophora_fusispora	0	0	0	0	0	0	0	0	0	0	0	0	0	0	0	0	0	0	0	0	0	0	0.00251	0	0	0	0	0	0	0	0	0.00957	0	0	0	0	0	0	0	0	0	0	0	0	0	0	0	0	0
d__Fungi|p__Ascomycota|c__Pezizomycotina_Incertae_sedis|o__Pezizomycotina_Incertae_sedis|f__Pezizomycotina_Incertae_sedis|g__Dokmaia	0	0	0	0	0	0	0.01405	0	0	0	0.00359	0	0	0	0	0	0	0	0	0	0	0	0	0	0	0	0	0	0	0	0	0	0	0	0	0	0	0	0	0	0	0	0	0	0	0	0	0	0
d__Fungi|p__Ascomycota|c__Pezizomycotina_Incertae_sedis|o__Pezizomycotina_Incertae_sedis|f__Pezizomycotina_Incertae_sedis|g__Dokmaia|s__Dokmaia_monthadangii	0	0	0	0	0	0	0.01405	0	0	0	0.00359	0	0	0	0	0	0	0	0	0	0	0	0	0	0	0	0	0	0	0	0	0	0	0	0	0	0	0	0	0	0	0	0	0	0	0	0	0	0
d__Fungi|p__Ascomycota|c__Pezizomycotina_Incertae_sedis|o__Pezizomycotina_Incertae_sedis|f__Pezizomycotina_Incertae_sedis|g__Fusicolla	0	0	0.02076	0	0	0	0	0	0	0	0	0	0	0	0	0	0	0	0	0	0	0	0	0	0	0.00385	0	0	0	0	0	0	0	0	0	0	0	0	0	0	0	0	0	0	0	0	0.11836	0	0
d__Fungi|p__Ascomycota|c__Pezizomycotina_Incertae_sedis|o__Pezizomycotina_Incertae_sedis|f__Pezizomycotina_Incertae_sedis|g__Fusicolla|s__Fusicolla_acetilerea	0	0	0.02076	0	0	0	0	0	0	0	0	0	0	0	0	0	0	0	0	0	0	0	0	0	0	0.00385	0	0	0	0	0	0	0	0	0	0	0	0	0	0	0	0	0	0	0	0	0.11836	0	0
d__Fungi|p__Ascomycota|c__Pezizomycotina_Incertae_sedis|o__Pezizomycotina_Incertae_sedis|f__Pezizomycotina_Incertae_sedis|g__Knufia	0	0	0	0	0	0	0	0	0	0	0	0	0	1.05555	0	0	0	0	0	0	0	0	0	0	0	0	0	0	0	0	0	0	0	0	0	0	0	0	0	0	0	0	0	0	0	0	0.00616	0	0
d__Fungi|p__Ascomycota|c__Pezizomycotina_Incertae_sedis|o__Pezizomycotina_Incertae_sedis|f__Pezizomycotina_Incertae_sedis|g__Knufia|s__Knufia_unclassified	0	0	0	0	0	0	0	0	0	0	0	0	0	1.05555	0	0	0	0	0	0	0	0	0	0	0	0	0	0	0	0	0	0	0	0	0	0	0	0	0	0	0	0	0	0	0	0	0.00616	0	0
d__Fungi|p__Ascomycota|c__Pezizomycotina_Incertae_sedis|o__Pezizomycotina_Incertae_sedis|f__Pezizomycotina_Incertae_sedis|g__Ochroconis	0	0	0	0	0	0	0	0	0	0	0	0	0.00268	0	0	0	0	0	0	0	0	0	0	0	0	0	0	0	0	0	0	0	0	0	0	0	0	0	0	0	0	0	0	0	0	0	0.0037	0	0
d__Fungi|p__Ascomycota|c__Pezizomycotina_Incertae_sedis|o__Pezizomycotina_Incertae_sedis|f__Pezizomycotina_Incertae_sedis|g__Ochroconis|s__Ochroconis_humicola	0	0	0	0	0	0	0	0	0	0	0	0	0.00268	0	0	0	0	0	0	0	0	0	0	0	0	0	0	0	0	0	0	0	0	0	0	0	0	0	0	0	0	0	0	0	0	0	0.0037	0	0
d__Fungi|p__Ascomycota|c__Pezizomycotina_Incertae_sedis|o__Pezizomycotina_Incertae_sedis|f__Pezizomycotina_Incertae_sedis|g__Staphylotrichum	0	0	0	0	0	0	0	0	0	0	0	0	0	0	0	0	0	0	0	0	0	0	0	0	0.01109	0	0	0	0	0	0	0	0	0	0	0	0	0	0	0	0	0	0	0	0	0	0.36247	0	0
d__Fungi|p__Ascomycota|c__Pezizomycotina_Incertae_sedis|o__Pezizomycotina_Incertae_sedis|f__Pezizomycotina_Incertae_sedis|g__Staphylotrichum|s__Staphylotrichum_coccosporum	0	0	0	0	0	0	0	0	0	0	0	0	0	0	0	0	0	0	0	0	0	0	0	0	0.01109	0	0	0	0	0	0	0	0	0	0	0	0	0	0	0	0	0	0	0	0	0	0.01726	0	0
d__Fungi|p__Ascomycota|c__Pezizomycotina_Incertae_sedis|o__Pezizomycotina_Incertae_sedis|f__Pezizomycotina_Incertae_sedis|g__Staphylotrichum|s__Staphylotrichum_unclassified	0	0	0	0	0	0	0	0	0	0	0	0	0	0	0	0	0	0	0	0	0	0	0	0	0	0	0	0	0	0	0	0	0	0	0	0	0	0	0	0	0	0	0	0	0	0	0.34521	0	0
d__Fungi|p__Ascomycota|c__Pezizomycotina_Incertae_sedis|o__Pezizomycotina_Incertae_sedis|f__Pezizomycotina_Incertae_sedis|g__Torula	0	0	0	0	0	0	0	0	0	0	0	0	0	0	0	0	0	0	0	0	0	0	0	0	0	0	0	0	0	0	0	0	0	0	0	0	0	0	0	0	0.0038	0	0	0	0	0	0	0	0.19284
d__Fungi|p__Ascomycota|c__Pezizomycotina_Incertae_sedis|o__Pezizomycotina_Incertae_sedis|f__Pezizomycotina_Incertae_sedis|g__Torula|s__Torula_caligans	0	0	0	0	0	0	0	0	0	0	0	0	0	0	0	0	0	0	0	0	0	0	0	0	0	0	0	0	0	0	0	0	0	0	0	0	0	0	0	0	0.0038	0	0	0	0	0	0	0	0.19284
d__Fungi|p__Ascomycota|c__Pezizomycotina_Incertae_sedis|o__Pezizomycotina_Incertae_sedis|f__Pezizomycotina_Incertae_sedis|g__Vermispora	0	0	0	0	0	0	0	0	0	0	0	0	0	0	0	0	0	0	0	0	0	0	0	0	0	0	0	0	0	0	0	0	0	0	0	0	0	0	0	0	0	0	0	0	0	0	0.00986	0	0
d__Fungi|p__Ascomycota|c__Pezizomycotina_Incertae_sedis|o__Pezizomycotina_Incertae_sedis|f__Pezizomycotina_Incertae_sedis|g__Vermispora|s__Vermispora_fusarina	0	0	0	0	0	0	0	0	0	0	0	0	0	0	0	0	0	0	0	0	0	0	0	0	0	0	0	0	0	0	0	0	0	0	0	0	0	0	0	0	0	0	0	0	0	0	0.00986	0	0
d__Fungi|p__Ascomycota|c__Pezizomycotina_Incertae_sedis|o__Pezizomycotina_Incertae_sedis|f__Pezizomycotina_Incertae_sedis|g__Veronaea	0	0	0	0	0	0	0	0	0	0	0	0	0	0	0	0	0	0	0	0	0	0	0	0	0	0	0	0	0	0	0	0	0	0	0	0	0	0	0	0	0	0	0	0	0	0	0	0	0
d__Fungi|p__Ascomycota|c__Pezizomycotina_Incertae_sedis|o__Pezizomycotina_Incertae_sedis|f__Pezizomycotina_Incertae_sedis|g__Veronaea|s__Veronaea_compacta	0	0	0	0	0	0	0	0	0	0	0	0	0	0	0	0	0	0	0	0	0	0	0	0	0	0	0	0	0	0	0	0	0	0	0	0	0	0	0	0	0	0	0	0	0	0	0	0	0
d__Fungi|p__Ascomycota|c__Pezizomycotina_Incertae_sedis|o__Pezizomycotina_Incertae_sedis|f__Pezizomycotina_Incertae_sedis|g__Xenochalara	0	0	0	0	0	0.00456	0	0	0	0	0	0	0	0	0.00372	0	0	3.62273	0	0	0	0	0	0.08519	0	0	0	0	0.05808	0	0	0.0586	0	0	0	0	0	0	0	0.22049	0	0	0	0	0	0	0	0	0
d__Fungi|p__Ascomycota|c__Pezizomycotina_Incertae_sedis|o__Pezizomycotina_Incertae_sedis|f__Pezizomycotina_Incertae_sedis|g__Xenochalara|s__Xenochalara_juniperi	0	0	0	0	0	0.00456	0	0	0	0	0	0	0	0	0.00372	0	0	3.62273	0	0	0	0	0	0.08519	0	0	0	0	0.05808	0	0	0.0586	0	0	0	0	0	0	0	0.22049	0	0	0	0	0	0	0	0	0
d__Fungi|p__Ascomycota|c__Pezizomycotina_cls_Incertae_sedis	0	0	0	0	0	0	0	0	0	0	0	0	0	0	0	0	0	0	0	0	0	0	0	0	0	0	0	0	0	0	0	0	0	0	0	0	0	0	0	0	0	0	0	0	0	0	0	0	0
d__Fungi|p__Ascomycota|c__Pezizomycotina_cls_Incertae_sedis|o__Pezizomycotina_ord_Incertae_sedis	0	0	0	0	0	0	0	0	0	0	0	0	0	0	0	0	0	0	0	0	0	0	0	0	0	0	0	0	0	0	0	0	0	0	0	0	0	0	0	0	0	0	0	0	0	0	0	0	0
d__Fungi|p__Ascomycota|c__Pezizomycotina_cls_Incertae_sedis|o__Pezizomycotina_ord_Incertae_sedis|f__Pezizomycotina_fam_Incertae_sedis	0	0	0	0	0	0	0	0	0	0	0	0	0	0	0	0	0	0	0	0	0	0	0	0	0	0	0	0	0	0	0	0	0	0	0	0	0	0	0	0	0	0	0	0	0	0	0	0	0
d__Fungi|p__Ascomycota|c__Pezizomycotina_cls_Incertae_sedis|o__Pezizomycotina_ord_Incertae_sedis|f__Pezizomycotina_fam_Incertae_sedis|g__Hymenula	0	0	0	0	0	0	0	0	0	0	0	0	0	0	0	0	0	0	0	0	0	0	0	0	0	0	0	0	0	0	0	0	0	0	0	0	0	0	0	0	0	0	0	0	0	0	0	0	0
d__Fungi|p__Ascomycota|c__Pezizomycotina_cls_Incertae_sedis|o__Pezizomycotina_ord_Incertae_sedis|f__Pezizomycotina_fam_Incertae_sedis|g__Hymenula|s__Hymenula_cerealis	0	0	0	0	0	0	0	0	0	0	0	0	0	0	0	0	0	0	0	0	0	0	0	0	0	0	0	0	0	0	0	0	0	0	0	0	0	0	0	0	0	0	0	0	0	0	0	0	0
d__Fungi|p__Ascomycota|c__Saccharomycetes	0.03867	1.78874	0.00519	0.01704	16.8453	0	0.18518	0	0	0.0037	0.00479	0	0	0.00801	0.21093	0.11914	0	5.70033	0.00628	0	0.15619	0.01028	2.70312	2.58043	0.03081	1.23655	0.11615	0	7.78359	0.01599	0.01695	0.04544	0.0912	0.39069	0.06864	0	1.6641	52.9653	0.0263	0.11446	1.06775	0.07327	4.16888	0.03086	0.81241	0	0.0037	0	88.4112
d__Fungi|p__Ascomycota|c__Saccharomycetes|o__Saccharomycetales	0.03867	1.78874	0.00519	0.01704	16.8453	0	0.18518	0	0	0.0037	0.00479	0	0	0.00801	0.21093	0.11914	0	5.70033	0.00628	0	0.15619	0.01028	2.70312	2.58043	0.03081	1.23655	0.11615	0	7.78359	0.01599	0.01695	0.04544	0.0912	0.39069	0.06864	0	1.6641	52.9653	0.0263	0.11446	1.06775	0.07327	4.16888	0.03086	0.81241	0	0.0037	0	88.4112
d__Fungi|p__Ascomycota|c__Saccharomycetes|o__Saccharomycetales|f__Debaryomycetaceae	0	0	0	0	0	0	0	0	0	0	0	0	0	0	0	0	0	0	0	0	0	0	0	0	0	0	0	0	0	0	0	0	0	0.33398	0	0	0	0	0	0	0.04185	0.03353	0	0	0	0	0	0	2.96542
d__Fungi|p__Ascomycota|c__Saccharomycetes|o__Saccharomycetales|f__Debaryomycetaceae|g__Meyerozyma	0	0	0	0	0	0	0	0	0	0	0	0	0	0	0	0	0	0	0	0	0	0	0	0	0	0	0	0	0	0	0	0	0	0.33398	0	0	0	0	0	0	0.04185	0.03353	0	0	0	0	0	0	2.96542
d__Fungi|p__Ascomycota|c__Saccharomycetes|o__Saccharomycetales|f__Debaryomycetaceae|g__Meyerozyma|s__Meyerozyma_guilliermondii	0	0	0	0	0	0	0	0	0	0	0	0	0	0	0	0	0	0	0	0	0	0	0	0	0	0	0	0	0	0	0	0	0	0.33398	0	0	0	0	0	0	0.04185	0.03353	0	0	0	0	0	0	2.96542
d__Fungi|p__Ascomycota|c__Saccharomycetes|o__Saccharomycetales|f__Eremotheciaceae	0	0	0	0	0	0	0	0	0	0.0037	0	0	0	0	0.20845	0	0	0	0	0	0	0	0	0	0	0	0	0	0	0	0	0	0	0	0	0	0	0	0	0	0	0	0	0	0	0	0	0	0
d__Fungi|p__Ascomycota|c__Saccharomycetes|o__Saccharomycetales|f__Eremotheciaceae|g__Eremothecium	0	0	0	0	0	0	0	0	0	0.0037	0	0	0	0	0.20845	0	0	0	0	0	0	0	0	0	0	0	0	0	0	0	0	0	0	0	0	0	0	0	0	0	0	0	0	0	0	0	0	0	0
d__Fungi|p__Ascomycota|c__Saccharomycetes|o__Saccharomycetales|f__Eremotheciaceae|g__Eremothecium|s__Eremothecium_cymbalariae	0	0	0	0	0	0	0	0	0	0.0037	0	0	0	0	0.20845	0	0	0	0	0	0	0	0	0	0	0	0	0	0	0	0	0	0	0	0	0	0	0	0	0	0	0	0	0	0	0	0	0	0
d__Fungi|p__Ascomycota|c__Saccharomycetes|o__Saccharomycetales|f__Saccharomycetaceae	0.00242	0.63341	0	0	0	0	0	0	0	0	0	0	0	0	0	0	0	5.70033	0	0	0.15619	0.01028	2.41044	0.03077	0.02095	0.52335	0	0	0.00924	0.00933	0	0.04066	0	0	0	0	1.64431	32.2019	0.0263	0.11446	0	0.03974	0	0.00864	0.00623	0	0.0037	0	0
d__Fungi|p__Ascomycota|c__Saccharomycetes|o__Saccharomycetales|f__Saccharomycetaceae|g__Debaryomyces	0	0	0	0	0	0	0	0	0	0	0	0	0	0	0	0	0	0	0	0	0	0	0	0	0	0	0	0	0	0	0	0.02272	0	0	0	0	0	0	0	0	0	0.03974	0	0	0	0	0	0	0
d__Fungi|p__Ascomycota|c__Saccharomycetes|o__Saccharomycetales|f__Saccharomycetaceae|g__Debaryomyces|s__Debaryomyces_hansenii	0	0	0	0	0	0	0	0	0	0	0	0	0	0	0	0	0	0	0	0	0	0	0	0	0	0	0	0	0	0	0	0.02272	0	0	0	0	0	0	0	0	0	0.03974	0	0	0	0	0	0	0
d__Fungi|p__Ascomycota|c__Saccharomycetes|o__Saccharomycetales|f__Saccharomycetaceae|g__Kazachstania	0	0.51334	0	0	0	0	0	0	0	0	0	0	0	0	0	0	0	0	0	0	0	0	0.01256	0.00592	0.02095	0.43741	0	0	0.00924	0	0	0.01076	0	0	0	0	0	0	0	0	0	0	0	0	0	0	0.0037	0	0
d__Fungi|p__Ascomycota|c__Saccharomycetes|o__Saccharomycetales|f__Saccharomycetaceae|g__Kazachstania|s__Kazachstania_barnettii	0	0.44841	0	0	0	0	0	0	0	0	0	0	0	0	0	0	0	0	0	0	0	0	0.01256	0.00592	0.02095	0.38867	0	0	0.00924	0	0	0.01076	0	0	0	0	0	0	0	0	0	0	0	0	0	0	0.0037	0	0
d__Fungi|p__Ascomycota|c__Saccharomycetes|o__Saccharomycetales|f__Saccharomycetaceae|g__Kazachstania|s__Kazachstania_exigua	0	0.06493	0	0	0	0	0	0	0	0	0	0	0	0	0	0	0	0	0	0	0	0	0	0	0	0.04874	0	0	0	0	0	0	0	0	0	0	0	0	0	0	0	0	0	0	0	0	0	0	0
d__Fungi|p__Ascomycota|c__Saccharomycetes|o__Saccharomycetales|f__Saccharomycetaceae|g__Kazachstania|s__Kazachstania_unispora	0	0	0	0	0	0	0	0	0	0	0	0	0	0	0	0	0	0	0	0	0	0	0	0	0	0	0	0	0	0	0	0	0	0	0	0	0	0	0	0	0	0	0	0	0	0	0	0	0
d__Fungi|p__Ascomycota|c__Saccharomycetes|o__Saccharomycetales|f__Saccharomycetaceae|g__Nakaseomyces	0	0	0	0	0	0	0	0	0	0	0	0	0	0	0	0	0	0	0	0	0	0	0	0.00355	0	0	0	0	0	0	0	0	0	0	0	0	0	0	0	0	0	0	0	0	0	0	0	0	0
d__Fungi|p__Ascomycota|c__Saccharomycetes|o__Saccharomycetales|f__Saccharomycetaceae|g__Nakaseomyces|s__Candida_glabrata	0	0	0	0	0	0	0	0	0	0	0	0	0	0	0	0	0	0	0	0	0	0	0	0.00355	0	0	0	0	0	0	0	0	0	0	0	0	0	0	0	0	0	0	0	0	0	0	0	0	0
d__Fungi|p__Ascomycota|c__Saccharomycetes|o__Saccharomycetales|f__Saccharomycetaceae|g__Saccharomyces	0.00242	0.12007	0	0	0	0	0	0	0	0	0	0	0	0	0	0	0	5.70033	0	0	0.15619	0.01028	2.39788	0.0213	0	0.08594	0	0	0	0.00933	0	0.00718	0	0	0	0	1.64431	32.2019	0.0263	0.11446	0	0	0	0.00864	0.00623	0	0	0	0
d__Fungi|p__Ascomycota|c__Saccharomycetes|o__Saccharomycetales|f__Saccharomycetaceae|g__Saccharomyces|s__Saccharomyces_unclassified	0.00242	0.12007	0	0	0	0	0	0	0	0	0	0	0	0	0	0	0	5.70033	0	0	0.15619	0.01028	2.39788	0.0213	0	0.08594	0	0	0	0.00933	0	0.00718	0	0	0	0	1.64431	32.2019	0.0263	0.11446	0	0	0	0.00864	0.00623	0	0	0	0
d__Fungi|p__Ascomycota|c__Saccharomycetes|o__Saccharomycetales|f__Saccharomycetales_Incertae_sedis	0.03625	1.15533	0.00519	0.01704	16.8453	0	0.18518	0	0	0	0.00479	0	0	0.00801	0.00248	0.11914	0	0	0.00628	0	0	0	0.29268	2.53901	0.00986	0.7132	0.11615	0	7.76775	0.00666	0.01695	0.00239	0.0912	0	0	0	0.01979	20.7634	0	0	1.02336	0	0	0.02222	0	0	0	0	85.4457
d__Fungi|p__Ascomycota|c__Saccharomycetes|o__Saccharomycetales|f__Saccharomycetales_Incertae_sedis|g__Candida	0.03625	1.15533	0.00519	0.01704	16.8453	0	0.18518	0	0	0	0.00479	0	0	0.00801	0.00248	0.11914	0	0	0.00628	0	0	0	0.28891	2.53901	0.00986	0.7132	0.11615	0	7.76775	0.00666	0.01695	0.00239	0.0912	0	0	0	0.01979	20.7634	0	0	1.02336	0	0	0.02222	0	0	0	0	85.4457
d__Fungi|p__Ascomycota|c__Saccharomycetes|o__Saccharomycetales|f__Saccharomycetales_Incertae_sedis|g__Candida|s__Candida_albicans	0.03625	0	0	0	0	0	0.02299	0	0	0	0	0	0	0.00801	0.00248	0.11914	0	0	0	0	0	0	0	0	0	0	0	0	7.75851	0.00666	0.00605	0	0	0	0	0	0.01979	0	0	0	0	0	0	0.02222	0	0	0	0	0
d__Fungi|p__Ascomycota|c__Saccharomycetes|o__Saccharomycetales|f__Saccharomycetales_Incertae_sedis|g__Candida|s__Candida_parapsilosis	0	0	0	0	0	0	0.01405	0	0	0	0.00479	0	0	0	0	0	0	0	0.00628	0	0	0	0.2776	0	0	0	0	0	0	0	0	0	0.0912	0	0	0	0	3.04981	0	0	1.02336	0	0	0	0	0	0	0	85.4457
d__Fungi|p__Ascomycota|c__Saccharomycetes|o__Saccharomycetales|f__Saccharomycetales_Incertae_sedis|g__Candida|s__Candida_quercitrusa	0	0	0	0	0	0	0	0	0	0	0	0	0	0	0	0	0	0	0	0	0	0	0	0	0	0	0.11615	0	0	0	0	0	0	0	0	0	0	17.7136	0	0	0	0	0	0	0	0	0	0	0
d__Fungi|p__Ascomycota|c__Saccharomycetes|o__Saccharomycetales|f__Saccharomycetales_Incertae_sedis|g__Candida|s__Candida_temnochilae	0	0	0	0	0	0	0	0	0	0	0	0	0	0	0	0	0	0	0	0	0	0	0.00377	0	0	0	0	0	0	0	0	0	0	0	0	0	0	0	0	0	0	0	0	0	0	0	0	0	0
d__Fungi|p__Ascomycota|c__Saccharomycetes|o__Saccharomycetales|f__Saccharomycetales_Incertae_sedis|g__Candida|s__Candida_tropicalis	0	1.15533	0.00519	0.01704	16.8453	0	0.14814	0	0	0	0	0	0	0	0	0	0	0	0	0	0	0	0.00754	2.53901	0.00986	0.7132	0	0	0.00924	0	0.0109	0.00239	0	0	0	0	0	0	0	0	0	0	0	0	0	0	0	0	0
d__Fungi|p__Ascomycota|c__Saccharomycetes|o__Saccharomycetales|f__Saccharomycetales_Incertae_sedis|g__Candida|s__Candida_unclassified	0	0	0	0	0	0	0	0	0	0	0	0	0	0	0	0	0	0	0	0	0	0	0	0	0	0	0	0	0	0	0	0	0	0	0	0	0	0	0	0	0	0	0	0	0	0	0	0	0
d__Fungi|p__Ascomycota|c__Saccharomycetes|o__Saccharomycetales|f__Saccharomycetales_Incertae_sedis|g__Cyberlindnera	0	0	0	0	0	0	0	0	0	0	0	0	0	0	0	0	0	0	0	0	0	0	0.00377	0	0	0	0	0	0	0	0	0	0	0	0	0	0	0	0	0	0	0	0	0	0	0	0	0	0
d__Fungi|p__Ascomycota|c__Saccharomycetes|o__Saccharomycetales|f__Saccharomycetales_Incertae_sedis|g__Cyberlindnera|s__Cyberlindnera_fabianii	0	0	0	0	0	0	0	0	0	0	0	0	0	0	0	0	0	0	0	0	0	0	0.00377	0	0	0	0	0	0	0	0	0	0	0	0	0	0	0	0	0	0	0	0	0	0	0	0	0	0
d__Fungi|p__Ascomycota|c__Saccharomycetes|o__Saccharomycetales|f__Saccharomycetales_Incertae_sedis|g__Wickerhamomyces	0	0	0	0	0	0	0	0	0	0	0	0	0	0	0	0	0	0	0	0	0	0	0	0	0	0	0	0	0	0	0	0	0	0	0	0	0	0	0	0	0	0	0	0	0	0	0	0	0
d__Fungi|p__Ascomycota|c__Saccharomycetes|o__Saccharomycetales|f__Saccharomycetales_Incertae_sedis|g__Wickerhamomyces|s__Wickerhamomyces_anomalus	0	0	0	0	0	0	0	0	0	0	0	0	0	0	0	0	0	0	0	0	0	0	0	0	0	0	0	0	0	0	0	0	0	0	0	0	0	0	0	0	0	0	0	0	0	0	0	0	0
d__Fungi|p__Ascomycota|c__Saccharomycetes|o__Saccharomycetales|f__Saccharomycopsidaceae	0	0	0	0	0	0	0	0	0	0	0	0	0	0	0	0	0	0	0	0	0	0	0	0	0	0	0	0	0	0	0	0	0	0.05671	0.06864	0	0	0	0	0	0.00254	0	4.16888	0	0.80618	0	0	0	0
d__Fungi|p__Ascomycota|c__Saccharomycetes|o__Saccharomycetales|f__Saccharomycopsidaceae|g__Saccharomycopsis	0	0	0	0	0	0	0	0	0	0	0	0	0	0	0	0	0	0	0	0	0	0	0	0	0	0	0	0	0	0	0	0	0	0.05671	0.06864	0	0	0	0	0	0.00254	0	4.16888	0	0.80618	0	0	0	0
d__Fungi|p__Ascomycota|c__Saccharomycetes|o__Saccharomycetales|f__Saccharomycopsidaceae|g__Saccharomycopsis|s__Saccharomycopsis_fibuligera	0	0	0	0	0	0	0	0	0	0	0	0	0	0	0	0	0	0	0	0	0	0	0	0	0	0	0	0	0	0	0	0	0	0.05671	0.06864	0	0	0	0	0	0.00254	0	4.16888	0	0.80618	0	0	0	0
d__Fungi|p__Ascomycota|c__Saccharomycetes|o__Saccharomycetales|f__Trichomonascaceae	0	0	0	0	0	0	0	0	0	0	0	0	0	0	0	0	0	0	0	0	0	0	0	0.01065	0	0	0	0	0.0066	0	0	0.00239	0	0	0	0	0	0	0	0	0	0	0	0	0	0	0	0	0
d__Fungi|p__Ascomycota|c__Saccharomycetes|o__Saccharomycetales|f__Trichomonascaceae|g__Trichomonascus	0	0	0	0	0	0	0	0	0	0	0	0	0	0	0	0	0	0	0	0	0	0	0	0.01065	0	0	0	0	0.0066	0	0	0.00239	0	0	0	0	0	0	0	0	0	0	0	0	0	0	0	0	0
d__Fungi|p__Ascomycota|c__Saccharomycetes|o__Saccharomycetales|f__Trichomonascaceae|g__Trichomonascus|s__Trichomonascus_ciferrii	0	0	0	0	0	0	0	0	0	0	0	0	0	0	0	0	0	0	0	0	0	0	0	0.01065	0	0	0	0	0.0066	0	0	0.00239	0	0	0	0	0	0	0	0	0	0	0	0	0	0	0	0	0
d__Fungi|p__Ascomycota|c__Sordariomycetes	40.4625	2.26041	12.2892	0.12782	9.30322	54.7606	28.8746	68.212	83.4379	45.0389	5.35803	42.3382	18.9976	4.41571	1.75324	10.1026	7.79474	10.7237	0.35033	0.1023	0	8.07422	10.7534	2.3083	4.33077	2.33585	0.06945	0.30875	15.9328	39.6481	0.04844	9.39009	29.1021	3.46331	38.9959	13.874	31.4718	4.83418	0.85944	36.4982	58.0461	77.5704	9.1226	40.7662	35.7286	0.00492	20.4362	24.5675	5.06522
d__Fungi|p__Ascomycota|c__Sordariomycetes|o__Branch06	0	0	0	0	0	0	0	0	0	0	0	0	0	0	0	0	0	0	0	0	0	0	0	0	0	0	0	0	0	0	0	0	0	0	0	0	0	0	0	0	0	0	0	0	0	0	0	0	0
d__Fungi|p__Ascomycota|c__Sordariomycetes|o__Branch06|f__Branch06_unclassified	0	0	0	0	0	0	0	0	0	0	0	0	0	0	0	0	0	0	0	0	0	0	0	0	0	0	0	0	0	0	0	0	0	0	0	0	0	0	0	0	0	0	0	0	0	0	0	0	0
d__Fungi|p__Ascomycota|c__Sordariomycetes|o__Branch06|f__Branch06_unclassified|g__Branch06_unclassified	0	0	0	0	0	0	0	0	0	0	0	0	0	0	0	0	0	0	0	0	0	0	0	0	0	0	0	0	0	0	0	0	0	0	0	0	0	0	0	0	0	0	0	0	0	0	0	0	0
d__Fungi|p__Ascomycota|c__Sordariomycetes|o__Branch06|f__Branch06_unclassified|g__Branch06_unclassified|s__Branch06_unclassified	0	0	0	0	0	0	0	0	0	0	0	0	0	0	0	0	0	0	0	0	0	0	0	0	0	0	0	0	0	0	0	0	0	0	0	0	0	0	0	0	0	0	0	0	0	0	0	0	0
d__Fungi|p__Ascomycota|c__Sordariomycetes|o__Coniochaetales	0	0	0	0	0	0	0	0	0	0	0	0	0	0	0	0	0	0	0	0	0	0	0	0	0	0	0	0	0	0	0	0	0	0	0	0	0	0	0	0	0	0	0	0	0	0	0.02096	0	0
d__Fungi|p__Ascomycota|c__Sordariomycetes|o__Coniochaetales|f__Coniochaetaceae	0	0	0	0	0	0	0	0	0	0	0	0	0	0	0	0	0	0	0	0	0	0	0	0	0	0	0	0	0	0	0	0	0	0	0	0	0	0	0	0	0	0	0	0	0	0	0.01849	0	0
d__Fungi|p__Ascomycota|c__Sordariomycetes|o__Coniochaetales|f__Coniochaetaceae|g__Coniochaetaceae_unclassified	0	0	0	0	0	0	0	0	0	0	0	0	0	0	0	0	0	0	0	0	0	0	0	0	0	0	0	0	0	0	0	0	0	0	0	0	0	0	0	0	0	0	0	0	0	0	0.00616	0	0
d__Fungi|p__Ascomycota|c__Sordariomycetes|o__Coniochaetales|f__Coniochaetaceae|g__Coniochaetaceae_unclassified|s__Coniochaetaceae_unclassified	0	0	0	0	0	0	0	0	0	0	0	0	0	0	0	0	0	0	0	0	0	0	0	0	0	0	0	0	0	0	0	0	0	0	0	0	0	0	0	0	0	0	0	0	0	0	0.00616	0	0
d__Fungi|p__Ascomycota|c__Sordariomycetes|o__Coniochaetales|f__Coniochaetaceae|g__Lecythophora	0	0	0	0	0	0	0	0	0	0	0	0	0	0	0	0	0	0	0	0	0	0	0	0	0	0	0	0	0	0	0	0	0	0	0	0	0	0	0	0	0	0	0	0	0	0	0.01233	0	0
d__Fungi|p__Ascomycota|c__Sordariomycetes|o__Coniochaetales|f__Coniochaetaceae|g__Lecythophora|s__Lecythophora_mutabilis	0	0	0	0	0	0	0	0	0	0	0	0	0	0	0	0	0	0	0	0	0	0	0	0	0	0	0	0	0	0	0	0	0	0	0	0	0	0	0	0	0	0	0	0	0	0	0	0	0
d__Fungi|p__Ascomycota|c__Sordariomycetes|o__Coniochaetales|f__Coniochaetaceae|g__Lecythophora|s__Lecythophora_unclassified	0	0	0	0	0	0	0	0	0	0	0	0	0	0	0	0	0	0	0	0	0	0	0	0	0	0	0	0	0	0	0	0	0	0	0	0	0	0	0	0	0	0	0	0	0	0	0.01233	0	0
d__Fungi|p__Ascomycota|c__Sordariomycetes|o__Coniochaetales|f__Coniochaetales_unclassified	0	0	0	0	0	0	0	0	0	0	0	0	0	0	0	0	0	0	0	0	0	0	0	0	0	0	0	0	0	0	0	0	0	0	0	0	0	0	0	0	0	0	0	0	0	0	0.00247	0	0
d__Fungi|p__Ascomycota|c__Sordariomycetes|o__Coniochaetales|f__Coniochaetales_unclassified|g__Coniochaetales_unclassified	0	0	0	0	0	0	0	0	0	0	0	0	0	0	0	0	0	0	0	0	0	0	0	0	0	0	0	0	0	0	0	0	0	0	0	0	0	0	0	0	0	0	0	0	0	0	0.00247	0	0
d__Fungi|p__Ascomycota|c__Sordariomycetes|o__Coniochaetales|f__Coniochaetales_unclassified|g__Coniochaetales_unclassified|s__Coniochaetales_unclassified	0	0	0	0	0	0	0	0	0	0	0	0	0	0	0	0	0	0	0	0	0	0	0	0	0	0	0	0	0	0	0	0	0	0	0	0	0	0	0	0	0	0	0	0	0	0	0.00247	0	0
d__Fungi|p__Ascomycota|c__Sordariomycetes|o__Diaporthales	0	0.50967	0.24648	0.01826	0	0.02279	0.13537	0	0.51916	0	0	0.02725	0.00803	0.00801	0	0.00486	0	5.1541	0	0.02557	0	0	0.01005	1.99832	0	0.47333	0	0.00778	0.08975	0	0.01816	0.10643	0	1.19603	0.09609	0.79985	0.00457	4.76785	0.0083	15.1453	0.05072	66.4581	4.57427	0	35.3	0	0	0	0.02572
d__Fungi|p__Ascomycota|c__Sordariomycetes|o__Diaporthales|f__Diaporthaceae	0	0.50967	0	0	0	0.00456	0.13537	0	0	0	0	0.00908	0.00803	0.00801	0	0.00486	0	5.1541	0	0.00365	0	0	0.01005	0.07099	0	0.47333	0	0	0.08975	0	0.01816	0.10643	0	0.02899	0	0	0	4.76785	0	0.26748	0	0.18129	0	0	0	0	0	0	0.00429
d__Fungi|p__Ascomycota|c__Sordariomycetes|o__Diaporthales|f__Diaporthaceae|g__Diaporthe	0	0.50967	0	0	0	0	0.13537	0	0	0	0	0.00908	0.00803	0.00801	0	0	0	0	0	0.00365	0	0	0	0	0	0.47333	0	0	0	0	0.01816	0	0	0.02899	0	0	0	4.76785	0	0	0	0.18129	0	0	0	0	0	0	0.00429
d__Fungi|p__Ascomycota|c__Sordariomycetes|o__Diaporthales|f__Diaporthaceae|g__Diaporthe|s__Diaporthe_unclassified	0	0	0	0	0	0	0.13537	0	0	0	0	0.00908	0.00803	0.00801	0	0	0	0	0	0.00365	0	0	0	0	0	0	0	0	0	0	0.01816	0	0	0.02899	0	0	0	4.76785	0	0	0	0.18129	0	0	0	0	0	0	0.00429
d__Fungi|p__Ascomycota|c__Sordariomycetes|o__Diaporthales|f__Diaporthaceae|g__Diaporthe|s__Phomopsis_longicolla	0	0.50967	0	0	0	0	0	0	0	0	0	0	0	0	0	0	0	0	0	0	0	0	0	0	0	0.47333	0	0	0	0	0	0	0	0	0	0	0	0	0	0	0	0	0	0	0	0	0	0	0
d__Fungi|p__Ascomycota|c__Sordariomycetes|o__Diaporthales|f__Diaporthaceae|g__Phomopsis	0	0	0	0	0	0.00456	0	0	0	0	0	0	0	0	0	0.00486	0	5.1541	0	0	0	0	0.01005	0.07099	0	0	0	0	0.08975	0	0	0.10643	0	0	0	0	0	0	0	0.26748	0	0	0	0	0	0	0	0	0
d__Fungi|p__Ascomycota|c__Sordariomycetes|o__Diaporthales|f__Diaporthaceae|g__Phomopsis|s__Phomopsis_unclassified	0	0	0	0	0	0.00456	0	0	0	0	0	0	0	0	0	0.00486	0	5.1541	0	0	0	0	0.01005	0.07099	0	0	0	0	0.08975	0	0	0.10643	0	0	0	0	0	0	0	0.26748	0	0	0	0	0	0	0	0	0
d__Fungi|p__Ascomycota|c__Sordariomycetes|o__Diaporthales|f__Valsaceae	0	0	0.24648	0.01826	0	0.01823	0	0	0.51916	0	0	0.01817	0	0	0	0	0	0	0	0.02192	0	0	0	1.92733	0	0	0	0.00778	0	0	0	0	0	1.16704	0.09609	0.79985	0.00457	0	0.0083	14.8778	0.05072	66.2768	4.57427	0	35.3	0	0	0	0.02143
d__Fungi|p__Ascomycota|c__Sordariomycetes|o__Diaporthales|f__Valsaceae|g__Cytospora	0	0	0	0	0	0	0	0	0	0	0	0	0	0	0	0	0	0	0	0	0	0	0	0	0	0	0	0	0	0	0	0	0	0	0	0	0	0	0	0	0	0	0	0	0.13333	0	0	0	0
d__Fungi|p__Ascomycota|c__Sordariomycetes|o__Diaporthales|f__Valsaceae|g__Cytospora|s__Cytospora_rhizophorae	0	0	0	0	0	0	0	0	0	0	0	0	0	0	0	0	0	0	0	0	0	0	0	0	0	0	0	0	0	0	0	0	0	0	0	0	0	0	0	0	0	0	0	0	0.13333	0	0	0	0
d__Fungi|p__Ascomycota|c__Sordariomycetes|o__Diaporthales|f__Valsaceae|g__Valsaceae_unclassified	0	0	0.24648	0.01826	0	0.01823	0	0	0.51916	0	0	0.01817	0	0	0	0	0	0	0	0.02192	0	0	0	1.92733	0	0	0	0.00778	0	0	0	0	0	1.16704	0.09609	0.79985	0.00457	0	0.0083	14.8778	0.05072	66.2768	4.57427	0	35.1667	0	0	0	0.02143
d__Fungi|p__Ascomycota|c__Sordariomycetes|o__Diaporthales|f__Valsaceae|g__Valsaceae_unclassified|s__Valsaceae_unclassified	0	0	0.24648	0.01826	0	0.01823	0	0	0.51916	0	0	0.01817	0	0	0	0	0	0	0	0.02192	0	0	0	1.92733	0	0	0	0.00778	0	0	0	0	0	1.16704	0.09609	0.79985	0.00457	0	0.0083	14.8778	0.05072	66.2768	4.57427	0	35.1667	0	0	0	0.02143
d__Fungi|p__Ascomycota|c__Sordariomycetes|o__Hypocreales	40.4625	1.32684	7.4581	0.05112	0.01407	0	28.6026	0.00378	0	45.0389	0.01794	39.9541	0.01606	4.39569	1.66762	10.0905	7.77861	4.86791	0.00879	0.00731	0	0.0044	10.7082	0.11831	4.28394	1.38021	0.01557	0.01297	15.843	0	0.01938	9.23463	19.946	0.83684	38.6191	0.0395	31.4581	0	0.03322	0.22411	44.5865	0.01739	2.70057	0.00494	0.00249	0	10.4191	0.01952	0.02286
d__Fungi|p__Ascomycota|c__Sordariomycetes|o__Hypocreales|f__Bionectriaceae	0	0	0	0	0	0	0	0	0	0	0	0	0	0	0	0	0	0	0	0	0	0	0	0	0.00739	0	0	0	0	0	0	0	0	0	0	0	0	0	0	0	0	0	0	0	0	0	0.03329	0	0
d__Fungi|p__Ascomycota|c__Sordariomycetes|o__Hypocreales|f__Bionectriaceae|g__Bionectria	0	0	0	0	0	0	0	0	0	0	0	0	0	0	0	0	0	0	0	0	0	0	0	0	0.00739	0	0	0	0	0	0	0	0	0	0	0	0	0	0	0	0	0	0	0	0	0	0.02219	0	0
d__Fungi|p__Ascomycota|c__Sordariomycetes|o__Hypocreales|f__Bionectriaceae|g__Bionectria|s__Bionectria_aff_ochroleuca_ROG_2010	0	0	0	0	0	0	0	0	0	0	0	0	0	0	0	0	0	0	0	0	0	0	0	0	0	0	0	0	0	0	0	0	0	0	0	0	0	0	0	0	0	0	0	0	0	0	0	0	0
d__Fungi|p__Ascomycota|c__Sordariomycetes|o__Hypocreales|f__Bionectriaceae|g__Bionectria|s__Bionectria_epichloe	0	0	0	0	0	0	0	0	0	0	0	0	0	0	0	0	0	0	0	0	0	0	0	0	0.00739	0	0	0	0	0	0	0	0	0	0	0	0	0	0	0	0	0	0	0	0	0	0	0	0
d__Fungi|p__Ascomycota|c__Sordariomycetes|o__Hypocreales|f__Bionectriaceae|g__Bionectria|s__Bionectria_rossmaniae	0	0	0	0	0	0	0	0	0	0	0	0	0	0	0	0	0	0	0	0	0	0	0	0	0	0	0	0	0	0	0	0	0	0	0	0	0	0	0	0	0	0	0	0	0	0	0	0	0
d__Fungi|p__Ascomycota|c__Sordariomycetes|o__Hypocreales|f__Bionectriaceae|g__Bionectria|s__Bionectria_unclassified	0	0	0	0	0	0	0	0	0	0	0	0	0	0	0	0	0	0	0	0	0	0	0	0	0	0	0	0	0	0	0	0	0	0	0	0	0	0	0	0	0	0	0	0	0	0	0.02219	0	0
d__Fungi|p__Ascomycota|c__Sordariomycetes|o__Hypocreales|f__Bionectriaceae|g__Nectriopsis	0	0	0	0	0	0	0	0	0	0	0	0	0	0	0	0	0	0	0	0	0	0	0	0	0	0	0	0	0	0	0	0	0	0	0	0	0	0	0	0	0	0	0	0	0	0	0.0074	0	0
d__Fungi|p__Ascomycota|c__Sordariomycetes|o__Hypocreales|f__Bionectriaceae|g__Nectriopsis|s__Nectriopsis_lecanodes	0	0	0	0	0	0	0	0	0	0	0	0	0	0	0	0	0	0	0	0	0	0	0	0	0	0	0	0	0	0	0	0	0	0	0	0	0	0	0	0	0	0	0	0	0	0	0.0074	0	0
d__Fungi|p__Ascomycota|c__Sordariomycetes|o__Hypocreales|f__Bionectriaceae|g__Verrucostoma	0	0	0	0	0	0	0	0	0	0	0	0	0	0	0	0	0	0	0	0	0	0	0	0	0	0	0	0	0	0	0	0	0	0	0	0	0	0	0	0	0	0	0	0	0	0	0.0037	0	0
d__Fungi|p__Ascomycota|c__Sordariomycetes|o__Hypocreales|f__Bionectriaceae|g__Verrucostoma|s__Verrucostoma_freycinetiae	0	0	0	0	0	0	0	0	0	0	0	0	0	0	0	0	0	0	0	0	0	0	0	0	0	0	0	0	0	0	0	0	0	0	0	0	0	0	0	0	0	0	0	0	0	0	0.0037	0	0
d__Fungi|p__Ascomycota|c__Sordariomycetes|o__Hypocreales|f__Clavicipitaceae	0	0	0	0	0	0	0	0	0	0	0	0	0	0	0	0	0	0	0	0	0	0	0	0	0	0	0	0	0	0	0	0	0	0	0	0	0	0	0	0	0	0	0	0	0.00249	0	0.0074	0	0
d__Fungi|p__Ascomycota|c__Sordariomycetes|o__Hypocreales|f__Clavicipitaceae|g__Cordyceps	0	0	0	0	0	0	0	0	0	0	0	0	0	0	0	0	0	0	0	0	0	0	0	0	0	0	0	0	0	0	0	0	0	0	0	0	0	0	0	0	0	0	0	0	0.00249	0	0	0	0
d__Fungi|p__Ascomycota|c__Sordariomycetes|o__Hypocreales|f__Clavicipitaceae|g__Cordyceps|s__Cordyceps_brongniartii	0	0	0	0	0	0	0	0	0	0	0	0	0	0	0	0	0	0	0	0	0	0	0	0	0	0	0	0	0	0	0	0	0	0	0	0	0	0	0	0	0	0	0	0	0.00249	0	0	0	0
d__Fungi|p__Ascomycota|c__Sordariomycetes|o__Hypocreales|f__Clavicipitaceae|g__Metacordyceps	0	0	0	0	0	0	0	0	0	0	0	0	0	0	0	0	0	0	0	0	0	0	0	0	0	0	0	0	0	0	0	0	0	0	0	0	0	0	0	0	0	0	0	0	0	0	0.00493	0	0
d__Fungi|p__Ascomycota|c__Sordariomycetes|o__Hypocreales|f__Clavicipitaceae|g__Metacordyceps|s__Metacordyceps_chlamydosporia	0	0	0	0	0	0	0	0	0	0	0	0	0	0	0	0	0	0	0	0	0	0	0	0	0	0	0	0	0	0	0	0	0	0	0	0	0	0	0	0	0	0	0	0	0	0	0.00493	0	0
d__Fungi|p__Ascomycota|c__Sordariomycetes|o__Hypocreales|f__Clavicipitaceae|g__Pochonia	0	0	0	0	0	0	0	0	0	0	0	0	0	0	0	0	0	0	0	0	0	0	0	0	0	0	0	0	0	0	0	0	0	0	0	0	0	0	0	0	0	0	0	0	0	0	0.00247	0	0
d__Fungi|p__Ascomycota|c__Sordariomycetes|o__Hypocreales|f__Clavicipitaceae|g__Pochonia|s__Pochonia_suchlasporia	0	0	0	0	0	0	0	0	0	0	0	0	0	0	0	0	0	0	0	0	0	0	0	0	0	0	0	0	0	0	0	0	0	0	0	0	0	0	0	0	0	0	0	0	0	0	0.00247	0	0
d__Fungi|p__Ascomycota|c__Sordariomycetes|o__Hypocreales|f__Hypocreaceae	0.04954	0	0	0	0.00767	0	0	0	0	0	0	0	0	0	0.03971	1.81385	0	0	0	0	0	0	0	0.02011	0	0	0	0	0	0	0	0	0	0	0	0	0.00457	0	0	0	0	0	0	0	0	0	0.00986	0	0
d__Fungi|p__Ascomycota|c__Sordariomycetes|o__Hypocreales|f__Hypocreaceae|g__Hypocrea	0.04954	0	0	0	0.00767	0	0	0	0	0	0	0	0	0	0.03971	1.81385	0	0	0	0	0	0	0	0.02011	0	0	0	0	0	0	0	0	0	0	0	0	0.00457	0	0	0	0	0	0	0	0	0	0.00986	0	0
d__Fungi|p__Ascomycota|c__Sordariomycetes|o__Hypocreales|f__Hypocreaceae|g__Hypocrea|s__Hypocrea_atroviridis	0.04954	0	0	0	0	0	0	0	0	0	0	0	0	0	0.03971	1.81385	0	0	0	0	0	0	0	0	0	0	0	0	0	0	0	0	0	0	0	0	0.00457	0	0	0	0	0	0	0	0	0	0	0	0
d__Fungi|p__Ascomycota|c__Sordariomycetes|o__Hypocreales|f__Hypocreaceae|g__Hypocrea|s__Hypocrea_crassa	0	0	0	0	0	0	0	0	0	0	0	0	0	0	0	0	0	0	0	0	0	0	0	0	0	0	0	0	0	0	0	0	0	0	0	0	0	0	0	0	0	0	0	0	0	0	0	0	0
d__Fungi|p__Ascomycota|c__Sordariomycetes|o__Hypocreales|f__Hypocreaceae|g__Hypocrea|s__Hypocrea_unclassified	0	0	0	0	0.00767	0	0	0	0	0	0	0	0	0	0	0	0	0	0	0	0	0	0	0	0	0	0	0	0	0	0	0	0	0	0	0	0	0	0	0	0	0	0	0	0	0	0.00986	0	0
d__Fungi|p__Ascomycota|c__Sordariomycetes|o__Hypocreales|f__Hypocreaceae|g__Hypocrea|s__Trichoderma_evansii	0	0	0	0	0	0	0	0	0	0	0	0	0	0	0	0	0	0	0	0	0	0	0	0.02011	0	0	0	0	0	0	0	0	0	0	0	0	0	0	0	0	0	0	0	0	0	0	0	0	0
d__Fungi|p__Ascomycota|c__Sordariomycetes|o__Hypocreales|f__Hypocreaceae|g__Hypocrea|s__Trichoderma_velutinum	0	0	0	0	0	0	0	0	0	0	0	0	0	0	0	0	0	0	0	0	0	0	0	0	0	0	0	0	0	0	0	0	0	0	0	0	0	0	0	0	0	0	0	0	0	0	0	0	0
d__Fungi|p__Ascomycota|c__Sordariomycetes|o__Hypocreales|f__Hypocreales_Incertae_sedis	0.09424	0	0	0	0	0	0.06002	0	0	45.0105	0	0.0026	0.00803	0.20417	0.0062	0.30029	7.77861	0	0	0	0	0	10.6416	0.00947	4.21371	0.09877	0	0	15.7982	0	0.00969	0.01076	0	0.34658	0.00749	0	0.49177	0	0.00831	0	0	0	0.02596	0	0	0	0.06287	0.01952	0
d__Fungi|p__Ascomycota|c__Sordariomycetes|o__Hypocreales|f__Hypocreales_Incertae_sedis|g__Acremonium	0	0	0	0	0	0	0.00766	0	0	45.0105	0	0	0.00803	0.20417	0	0	0	0	0	0	0	0	10.4658	0	0	0	0	0	0	0	0	0	0	0	0.00749	0	0	0	0	0	0	0	0.02596	0	0	0	0	0	0
d__Fungi|p__Ascomycota|c__Sordariomycetes|o__Hypocreales|f__Hypocreales_Incertae_sedis|g__Acremonium|s__Acremonium_alcalophilum	0	0	0	0	0	0	0	0	0	45.0105	0	0	0.00803	0	0	0	0	0	0	0	0	0	0	0	0	0	0	0	0	0	0	0	0	0	0.00749	0	0	0	0	0	0	0	0.02596	0	0	0	0	0	0
d__Fungi|p__Ascomycota|c__Sordariomycetes|o__Hypocreales|f__Hypocreales_Incertae_sedis|g__Acremonium|s__Acremonium_brachypenium	0	0	0	0	0	0	0	0	0	0	0	0	0	0.20417	0	0	0	0	0	0	0	0	4.38251	0	0	0	0	0	0	0	0	0	0	0	0	0	0	0	0	0	0	0	0	0	0	0	0	0	0
d__Fungi|p__Ascomycota|c__Sordariomycetes|o__Hypocreales|f__Hypocreales_Incertae_sedis|g__Acremonium|s__Acremonium_implicatum	0	0	0	0	0	0	0.00766	0	0	0	0	0	0	0	0	0	0	0	0	0	0	0	0	0	0	0	0	0	0	0	0	0	0	0	0	0	0	0	0	0	0	0	0	0	0	0	0	0	0
d__Fungi|p__Ascomycota|c__Sordariomycetes|o__Hypocreales|f__Hypocreales_Incertae_sedis|g__Acremonium|s__Acremonium_persicinum	0	0	0	0	0	0	0	0	0	0	0	0	0	0	0	0	0	0	0	0	0	0	6.08325	0	0	0	0	0	0	0	0	0	0	0	0	0	0	0	0	0	0	0	0	0	0	0	0	0	0
d__Fungi|p__Ascomycota|c__Sordariomycetes|o__Hypocreales|f__Hypocreales_Incertae_sedis|g__Emericellopsis	0	0	0	0	0	0	0	0	0	0	0	0	0	0	0	0	0	0	0	0	0	0	0	0	0	0	0	0	0	0	0	0	0	0	0	0	0	0	0	0	0	0	0	0	0	0	0.0037	0	0
d__Fungi|p__Ascomycota|c__Sordariomycetes|o__Hypocreales|f__Hypocreales_Incertae_sedis|g__Emericellopsis|s__Emericellopsis_unclassified	0	0	0	0	0	0	0	0	0	0	0	0	0	0	0	0	0	0	0	0	0	0	0	0	0	0	0	0	0	0	0	0	0	0	0	0	0	0	0	0	0	0	0	0	0	0	0.0037	0	0
d__Fungi|p__Ascomycota|c__Sordariomycetes|o__Hypocreales|f__Hypocreales_Incertae_sedis|g__Hypocreales_Incertae_sedis_unclassified	0	0	0	0	0	0	0	0	0	0	0	0.0026	0	0	0	0	0	0	0	0	0	0	0.04773	0	0	0	0	0	0	0	0	0	0	0	0	0	0	0	0	0	0	0	0	0	0	0	0	0	0
d__Fungi|p__Ascomycota|c__Sordariomycetes|o__Hypocreales|f__Hypocreales_Incertae_sedis|g__Hypocreales_Incertae_sedis_unclassified|s__Hypocreales_Incertae_sedis_unclassified	0	0	0	0	0	0	0	0	0	0	0	0.0026	0	0	0	0	0	0	0	0	0	0	0.04773	0	0	0	0	0	0	0	0	0	0	0	0	0	0	0	0	0	0	0	0	0	0	0	0	0	0
d__Fungi|p__Ascomycota|c__Sordariomycetes|o__Hypocreales|f__Hypocreales_Incertae_sedis|g__Myrothecium	0	0	0	0	0	0	0	0	0	0	0	0	0	0	0	0	0	0	0	0	0	0	0.12059	0	4.21001	0.09877	0	0	0	0	0	0	0	0	0	0	0	0	0	0	0	0	0	0	0	0	0.05424	0	0
d__Fungi|p__Ascomycota|c__Sordariomycetes|o__Hypocreales|f__Hypocreales_Incertae_sedis|g__Myrothecium|s__Myrothecium_leucotrichum	0	0	0	0	0	0	0	0	0	0	0	0	0	0	0	0	0	0	0	0	0	0	0.02889	0	0.0456	0.04361	0	0	0	0	0	0	0	0	0	0	0	0	0	0	0	0	0	0	0	0	0.02342	0	0
d__Fungi|p__Ascomycota|c__Sordariomycetes|o__Hypocreales|f__Hypocreales_Incertae_sedis|g__Myrothecium|s__Myrothecium_roridum	0	0	0	0	0	0	0	0	0	0	0	0	0	0	0	0	0	0	0	0	0	0	0	0	0	0.00513	0	0	0	0	0	0	0	0	0	0	0	0	0	0	0	0	0	0	0	0	0	0	0
d__Fungi|p__Ascomycota|c__Sordariomycetes|o__Hypocreales|f__Hypocreales_Incertae_sedis|g__Myrothecium|s__Myrothecium_unclassified	0	0	0	0	0	0	0	0	0	0	0	0	0	0	0	0	0	0	0	0	0	0	0.03015	0	4.13853	0	0	0	0	0	0	0	0	0	0	0	0	0	0	0	0	0	0	0	0	0	0.02219	0	0
d__Fungi|p__Ascomycota|c__Sordariomycetes|o__Hypocreales|f__Hypocreales_Incertae_sedis|g__Myrothecium|s__Myrothecium_verrucaria	0	0	0	0	0	0	0	0	0	0	0	0	0	0	0	0	0	0	0	0	0	0	0.06155	0	0.02588	0.05003	0	0	0	0	0	0	0	0	0	0	0	0	0	0	0	0	0	0	0	0	0.00863	0	0
d__Fungi|p__Ascomycota|c__Sordariomycetes|o__Hypocreales|f__Hypocreales_Incertae_sedis|g__Sarocladium	0.09424	0	0	0	0	0	0.05236	0	0	0	0	0	0	0	0.00248	0.24801	0	0	0	0	0	0	0	0.00947	0	0	0	0	15.7982	0	0.00969	0.00239	0	0	0	0	0.49177	0	0	0	0	0	0	0	0	0	0.00493	0.01952	0
d__Fungi|p__Ascomycota|c__Sordariomycetes|o__Hypocreales|f__Hypocreales_Incertae_sedis|g__Sarocladium|s__Nectria_mauritiicola	0	0	0	0	0	0	0	0	0	0	0	0	0	0	0	0	0	0	0	0	0	0	0	0	0	0	0	0	0	0	0	0	0	0	0	0	0	0	0	0	0	0	0	0	0	0	0	0	0
d__Fungi|p__Ascomycota|c__Sordariomycetes|o__Hypocreales|f__Hypocreales_Incertae_sedis|g__Sarocladium|s__Sarocladium_oryzae	0	0	0	0	0	0	0.05236	0	0	0	0	0	0	0	0	0	0	0	0	0	0	0	0	0	0	0	0	0	0	0	0.00969	0	0	0	0	0	0	0	0	0	0	0	0	0	0	0	0	0	0
d__Fungi|p__Ascomycota|c__Sordariomycetes|o__Hypocreales|f__Hypocreales_Incertae_sedis|g__Sarocladium|s__Sarocladium_strictum	0.09424	0	0	0	0	0	0	0	0	0	0	0	0	0	0.00248	0.24801	0	0	0	0	0	0	0	0.00947	0	0	0	0	15.7982	0	0	0.00239	0	0	0	0	0.49177	0	0	0	0	0	0	0	0	0	0.00493	0.01952	0
d__Fungi|p__Ascomycota|c__Sordariomycetes|o__Hypocreales|f__Hypocreales_Incertae_sedis|g__Sarocladium|s__Sarocladium_unclassified	0	0	0	0	0	0	0	0	0	0	0	0	0	0	0	0	0	0	0	0	0	0	0	0	0	0	0	0	0	0	0	0	0	0	0	0	0	0	0	0	0	0	0	0	0	0	0	0	0
d__Fungi|p__Ascomycota|c__Sordariomycetes|o__Hypocreales|f__Hypocreales_Incertae_sedis|g__Stachybotrys	0	0	0	0	0	0	0	0	0	0	0	0	0	0	0.00372	0.05228	7.77861	0	0	0	0	0	0.00754	0	0.0037	0	0	0	0	0	0	0.00837	0	0	0	0	0	0	0.00554	0	0	0	0	0	0	0	0	0	0
d__Fungi|p__Ascomycota|c__Sordariomycetes|o__Hypocreales|f__Hypocreales_Incertae_sedis|g__Stachybotrys|s__Stachybotrys_bisbyi	0	0	0	0	0	0	0	0	0	0	0	0	0	0	0	0	0	0	0	0	0	0	0.00754	0	0	0	0	0	0	0	0	0	0	0	0	0	0	0	0	0	0	0	0	0	0	0	0	0	0
d__Fungi|p__Ascomycota|c__Sordariomycetes|o__Hypocreales|f__Hypocreales_Incertae_sedis|g__Stachybotrys|s__Stachybotrys_chartarum	0	0	0	0	0	0	0	0	0	0	0	0	0	0	0.00372	0.05228	7.77861	0	0	0	0	0	0	0	0.0037	0	0	0	0	0	0	0.00837	0	0	0	0	0	0	0.00554	0	0	0	0	0	0	0	0	0	0
d__Fungi|p__Ascomycota|c__Sordariomycetes|o__Hypocreales|f__Hypocreales_Incertae_sedis|g__Stachybotrys|s__Stachybotrys_unclassified	0	0	0	0	0	0	0	0	0	0	0	0	0	0	0	0	0	0	0	0	0	0	0	0	0	0	0	0	0	0	0	0	0	0	0	0	0	0	0	0	0	0	0	0	0	0	0	0	0
d__Fungi|p__Ascomycota|c__Sordariomycetes|o__Hypocreales|f__Hypocreales_Incertae_sedis|g__Villosiclava	0	0	0	0	0	0	0	0	0	0	0	0	0	0	0	0	0	0	0	0	0	0	0	0	0	0	0	0	0	0	0	0	0	0.34658	0	0	0	0	0.00277	0	0	0	0	0	0	0	0	0	0
d__Fungi|p__Ascomycota|c__Sordariomycetes|o__Hypocreales|f__Hypocreales_Incertae_sedis|g__Villosiclava|s__Ustilaginoidea_virens	0	0	0	0	0	0	0	0	0	0	0	0	0	0	0	0	0	0	0	0	0	0	0	0	0	0	0	0	0	0	0	0	0	0.34658	0	0	0	0	0.00277	0	0	0	0	0	0	0	0	0	0
d__Fungi|p__Ascomycota|c__Sordariomycetes|o__Hypocreales|f__Hypocreales_unclassified	0	0	0	0	0	0	0.01788	0	0	0	0	0	0	0	0	0	0	0	0	0	0	0	0	0.01301	0.00739	0	0	0	0	0	0	0.00239	0	0	0	0.02222	20.1047	0	0	0	0	0	0	0	0	0	0.00616	0	0
d__Fungi|p__Ascomycota|c__Sordariomycetes|o__Hypocreales|f__Hypocreales_unclassified|g__Hypocreales_unclassified	0	0	0	0	0	0	0.01788	0	0	0	0	0	0	0	0	0	0	0	0	0	0	0	0	0.01301	0.00739	0	0	0	0	0	0	0.00239	0	0	0	0.02222	20.1047	0	0	0	0	0	0	0	0	0	0.00616	0	0
d__Fungi|p__Ascomycota|c__Sordariomycetes|o__Hypocreales|f__Hypocreales_unclassified|g__Hypocreales_unclassified|s__Hypocreales_unclassified	0	0	0	0	0	0	0.01788	0	0	0	0	0	0	0	0	0	0	0	0	0	0	0	0	0.01301	0.00739	0	0	0	0	0	0	0.00239	0	0	0	0.02222	20.1047	0	0	0	0	0	0	0	0	0	0.00616	0	0
d__Fungi|p__Ascomycota|c__Sordariomycetes|o__Hypocreales|f__Nectriaceae	40.3187	1.32684	7.4581	0.04382	0.00384	0	5.98692	0	0	0.02839	0.01794	39.9515	0.00803	4.18485	1.62171	7.97632	0	4.86791	0.00879	0.00731	0	0.0044	0.06657	0.07572	0.05545	1.28144	0.01557	0.01297	0.04488	0	0	9.22148	19.946	0.49026	38.6116	0.01728	10.857	0	0.02491	0.22411	44.5865	0.01739	2.67461	0.00494	0	0	10.2995	0	0.02286
d__Fungi|p__Ascomycota|c__Sordariomycetes|o__Hypocreales|f__Nectriaceae|g__Cosmospora	0	0	0	0	0	0	0	0	0	0	0	0	0	0	0	0	0	0	0	0	0	0	0	0	0	0	0	0	0	0	0	0	0	0	0	0	0	0	0	0	0	0	0	0	0	0	0.02836	0	0
d__Fungi|p__Ascomycota|c__Sordariomycetes|o__Hypocreales|f__Nectriaceae|g__Cosmospora|s__Cosmospora_butyri	0	0	0	0	0	0	0	0	0	0	0	0	0	0	0	0	0	0	0	0	0	0	0	0	0	0	0	0	0	0	0	0	0	0	0	0	0	0	0	0	0	0	0	0	0	0	0.02836	0	0
d__Fungi|p__Ascomycota|c__Sordariomycetes|o__Hypocreales|f__Nectriaceae|g__Cosmospora|s__Cosmospora_vilior	0	0	0	0	0	0	0	0	0	0	0	0	0	0	0	0	0	0	0	0	0	0	0	0	0	0	0	0	0	0	0	0	0	0	0	0	0	0	0	0	0	0	0	0	0	0	0	0	0
d__Fungi|p__Ascomycota|c__Sordariomycetes|o__Hypocreales|f__Nectriaceae|g__Cylindrocarpon	0	0	0	0	0	0	0	0	0	0	0	0	0	0	0	0	0	0	0	0	0	0	0	0	0	0	0	0	0	0	0	0	0	0	0	0	0	0	0	0	0	0	0	0	0	0	0.46357	0	0
d__Fungi|p__Ascomycota|c__Sordariomycetes|o__Hypocreales|f__Nectriaceae|g__Cylindrocarpon|s__Cylindrocarpon_olidum	0	0	0	0	0	0	0	0	0	0	0	0	0	0	0	0	0	0	0	0	0	0	0	0	0	0	0	0	0	0	0	0	0	0	0	0	0	0	0	0	0	0	0	0	0	0	0.10973	0	0
d__Fungi|p__Ascomycota|c__Sordariomycetes|o__Hypocreales|f__Nectriaceae|g__Cylindrocarpon|s__Cylindrocarpon_unclassified	0	0	0	0	0	0	0	0	0	0	0	0	0	0	0	0	0	0	0	0	0	0	0	0	0	0	0	0	0	0	0	0	0	0	0	0	0	0	0	0	0	0	0	0	0	0	0.35384	0	0
d__Fungi|p__Ascomycota|c__Sordariomycetes|o__Hypocreales|f__Nectriaceae|g__Fusarium	0	0	0	0	0	0	0	0	0	0	0	0	0	0	0	0	0	0	0	0	0	0	0	0	0.01356	0.00898	0	0	0	0	0	0.01196	0	0	0	0	0	0	0	0	0	0	0	0	0	0	4.87726	0	0
d__Fungi|p__Ascomycota|c__Sordariomycetes|o__Hypocreales|f__Nectriaceae|g__Fusarium|s__Fusarium_cuneirostrum	0	0	0	0	0	0	0	0	0	0	0	0	0	0	0	0	0	0	0	0	0	0	0	0	0	0	0	0	0	0	0	0	0	0	0	0	0	0	0	0	0	0	0	0	0	0	0.1726	0	0
d__Fungi|p__Ascomycota|c__Sordariomycetes|o__Hypocreales|f__Nectriaceae|g__Fusarium|s__Fusarium_keratoplasticum	0	0	0	0	0	0	0	0	0	0	0	0	0	0	0	0	0	0	0	0	0	0	0	0	0.01356	0	0	0	0	0	0	0.01196	0	0	0	0	0	0	0	0	0	0	0	0	0	0	0	0	0
d__Fungi|p__Ascomycota|c__Sordariomycetes|o__Hypocreales|f__Nectriaceae|g__Fusarium|s__Fusarium_merismoides	0	0	0	0	0	0	0	0	0	0	0	0	0	0	0	0	0	0	0	0	0	0	0	0	0	0.00898	0	0	0	0	0	0	0	0	0	0	0	0	0	0	0	0	0	0	0	0	4.70466	0	0
d__Fungi|p__Ascomycota|c__Sordariomycetes|o__Hypocreales|f__Nectriaceae|g__Fusicolla	0	0	0	0	0	0	0	0	0	0	0	0	0	0	0	0	0	0	0	0	0	0	0	0	0	0	0	0	0	0	0	0	0	0	0	0	0	0	0	0	0	0	0	0	0	0	0.49685	0	0
d__Fungi|p__Ascomycota|c__Sordariomycetes|o__Hypocreales|f__Nectriaceae|g__Fusicolla|s__Fusicolla_unclassified	0	0	0	0	0	0	0	0	0	0	0	0	0	0	0	0	0	0	0	0	0	0	0	0	0	0	0	0	0	0	0	0	0	0	0	0	0	0	0	0	0	0	0	0	0	0	0.49685	0	0
d__Fungi|p__Ascomycota|c__Sordariomycetes|o__Hypocreales|f__Nectriaceae|g__Gibberella	40.03	1.32684	7.4581	0.04382	0	0	5.98692	0	0	0	0.01555	39.9515	0	4.18485	0	0	0	4.86791	0.00628	0.00731	0	0.0044	0.02889	0.07572	0.02341	1.25194	0.00958	0.01297	0.03564	0	0	9.20952	19.9268	0.45623	0.03868	0.00617	10.854	0	0.00969	0.22411	44.5865	0.01739	2.67461	0.00494	0	0	0.41918	0	0.02286
d__Fungi|p__Ascomycota|c__Sordariomycetes|o__Hypocreales|f__Nectriaceae|g__Gibberella|s__Fusarium_annulatum	0	0.14824	0	0	0	0	0	0	0	0	0	0	0	0	0	0	0	4.86791	0	0	0	0	0.01256	0.07335	0	0.12314	0	0	0.03564	0	0	9.20952	0	0	0	0.00617	0	0	0.00969	0.22411	0	0	0	0	0	0	0	0	0
d__Fungi|p__Ascomycota|c__Sordariomycetes|o__Hypocreales|f__Nectriaceae|g__Gibberella|s__Fusarium_asiaticum	0	0.18622	0	0	0	0	0	0	0	0	0	0	0	0	0	0	0	0	0	0	0	0	0	0	0	0.15136	0	0	0	0	0	0	0	0	0.02745	0	0	0	0	0	0	0	1.5709	0	0	0	0.03945	0	0
d__Fungi|p__Ascomycota|c__Sordariomycetes|o__Hypocreales|f__Nectriaceae|g__Gibberella|s__Fusarium_cf_equiseti_MY_2011	0	0.99238	0	0	0	0	0.01405	0	0	0	0	0	0	1.41452	0	0	0	0	0	0	0	0.0044	0.00879	0	0.01602	0.97744	0	0	0	0	0	0	0	0.44489	0.01123	0	0	0	0	0	0	0.00621	1.01719	0	0	0	0.0863	0	0.01
d__Fungi|p__Ascomycota|c__Sordariomycetes|o__Hypocreales|f__Nectriaceae|g__Gibberella|s__Fusarium_kyushuense	0	0	0	0	0	0	0	0	0	0	0	0	0	0	0	0	0	0	0	0	0	0	0	0	0	0	0	0	0	0	0	0	0	0	0	0	0	0	0	0	0	0	0	0	0	0	0	0	0
d__Fungi|p__Ascomycota|c__Sordariomycetes|o__Hypocreales|f__Nectriaceae|g__Gibberella|s__Fusarium_nygamai	0	0	0	0	0	0	0	0	0	0	0	0	0	0	0	0	0	0	0	0	0	0	0	0	0.00739	0	0	0	0	0	0	0	0	0	0	0	0	0	0	0	0	0	0	0	0	0	0	0	0
d__Fungi|p__Ascomycota|c__Sordariomycetes|o__Hypocreales|f__Nectriaceae|g__Gibberella|s__Fusarium_oxysporum	40.03	0	0	0	0	0	0	0	0	0	0	0	0	0	0	0	0	0	0	0	0	0	0	0	0	0	0	0	0	0	0	0	0	0	0	0	0	0	0	0	0	0	0	0	0	0	0.26877	0	0
d__Fungi|p__Ascomycota|c__Sordariomycetes|o__Hypocreales|f__Nectriaceae|g__Gibberella|s__Fusarium_pseudonygamai	0	0	7.4581	0.04382	0	0	5.97287	0	0	0	0.01555	39.9515	0	2.77033	0	0	0	0	0.00628	0.00731	0	0	0	0	0	0	0.00958	0.01297	0	0	0	0	0.61015	0.01134	0	0	10.854	0	0	0	44.5865	0.01118	0	0.00494	0	0	0	0	0.01
d__Fungi|p__Ascomycota|c__Sordariomycetes|o__Hypocreales|f__Nectriaceae|g__Gibberella|s__Fusarium_torulosum	0	0	0	0	0	0	0	0	0	0	0	0	0	0	0	0	0	0	0	0	0	0	0	0	0	0	0	0	0	0	0	0	0	0	0	0	0	0	0	0	0	0	0	0	0	0	0.01233	0	0
d__Fungi|p__Ascomycota|c__Sordariomycetes|o__Hypocreales|f__Nectriaceae|g__Gibberella|s__Fusarium_tricinctum	0	0	0	0	0	0	0	0	0	0	0	0	0	0	0	0	0	0	0	0	0	0	0	0	0	0	0	0	0	0	0	0	19.3166	0	0	0	0	0	0	0	0	0	0	0	0	0	0	0	0.00286
d__Fungi|p__Ascomycota|c__Sordariomycetes|o__Hypocreales|f__Nectriaceae|g__Gibberella|s__Fusarium_venenatum	0	0	0	0	0	0	0	0	0	0	0	0	0	0	0	0	0	0	0	0	0	0	0	0	0	0	0	0	0	0	0	0	0	0	0	0	0	0	0	0	0	0	0.08652	0	0	0	0	0	0
d__Fungi|p__Ascomycota|c__Sordariomycetes|o__Hypocreales|f__Nectriaceae|g__Gibberella|s__Gibberella_tricincta	0	0	0	0	0	0	0	0	0	0	0	0	0	0	0	0	0	0	0	0	0	0	0.00754	0.00237	0	0	0	0	0	0	0	0	0	0	0	0	0	0	0	0	0	0	0	0	0	0	0	0	0
d__Fungi|p__Ascomycota|c__Sordariomycetes|o__Hypocreales|f__Nectriaceae|g__Gibberella|s__Gibberella_unclassified	0	0	0	0	0	0	0	0	0	0	0	0	0	0	0	0	0	0	0	0	0	0	0	0	0	0	0	0	0	0	0	0	0	0	0	0	0	0	0	0	0	0	0	0	0	0	0.01233	0	0
d__Fungi|p__Ascomycota|c__Sordariomycetes|o__Hypocreales|f__Nectriaceae|g__Glionectria	0.28876	0	0	0	0	0	0	0	0	0	0	0	0	0	0.17619	7.97632	0	0	0	0	0	0	0	0	0	0	0	0	0.00924	0	0	0	0	0	0	0	0.00305	0	0	0	0	0	0	0	0	0	0	0	0
d__Fungi|p__Ascomycota|c__Sordariomycetes|o__Hypocreales|f__Nectriaceae|g__Glionectria|s__Glionectria_tenuis	0.28876	0	0	0	0	0	0	0	0	0	0	0	0	0	0.17619	7.97632	0	0	0	0	0	0	0	0	0	0	0	0	0.00924	0	0	0	0	0	0	0	0.00305	0	0	0	0	0	0	0	0	0	0	0	0
d__Fungi|p__Ascomycota|c__Sordariomycetes|o__Hypocreales|f__Nectriaceae|g__Haematonectria	0	0	0	0	0.00384	0	0	0	0	0	0.00239	0	0.00803	0	0	0	0	0	0	0	0	0	0	0	0	0	0.00599	0	0	0	0	0	0.0167	0.03403	38.5729	0.01111	0	0	0	0	0	0	0	0	0	0	0.01356	0	0
d__Fungi|p__Ascomycota|c__Sordariomycetes|o__Hypocreales|f__Nectriaceae|g__Haematonectria|s__Fusarium_solani	0	0	0	0	0	0	0	0	0	0	0	0	0	0	0	0	0	0	0	0	0	0	0	0	0	0	0	0	0	0	0	0	0	0	0.00624	0	0	0	0	0	0	0	0	0	0	0	0	0	0
d__Fungi|p__Ascomycota|c__Sordariomycetes|o__Hypocreales|f__Nectriaceae|g__Haematonectria|s__Haematonectria_unclassified	0	0	0	0	0.00384	0	0	0	0	0	0.00239	0	0.00803	0	0	0	0	0	0	0	0	0	0	0	0	0	0.00599	0	0	0	0	0	0.0167	0.03403	38.5667	0.01111	0	0	0	0	0	0	0	0	0	0	0.01356	0	0
d__Fungi|p__Ascomycota|c__Sordariomycetes|o__Hypocreales|f__Nectriaceae|g__Ilyonectria	0	0	0	0	0	0	0	0	0	0	0	0	0	0	0	0	0	0	0	0	0	0	0	0	0	0	0	0	0	0	0	0	0	0	0	0	0	0	0	0	0	0	0	0	0	0	0.02836	0	0
d__Fungi|p__Ascomycota|c__Sordariomycetes|o__Hypocreales|f__Nectriaceae|g__Ilyonectria|s__Ilyonectria_robusta	0	0	0	0	0	0	0	0	0	0	0	0	0	0	0	0	0	0	0	0	0	0	0	0	0	0	0	0	0	0	0	0	0	0	0	0	0	0	0	0	0	0	0	0	0	0	0.02836	0	0
d__Fungi|p__Ascomycota|c__Sordariomycetes|o__Hypocreales|f__Nectriaceae|g__Nectria	0	0	0	0	0	0	0	0	0	0.02839	0	0	0	0	1.44552	0	0	0	0	0	0	0	0.03391	0	0.00739	0.01411	0	0	0	0	0	0	0	0	0	0	0	0	0.01522	0	0	0	0	0	0	0	3.55562	0	0
d__Fungi|p__Ascomycota|c__Sordariomycetes|o__Hypocreales|f__Nectriaceae|g__Nectriaceae_unclassified	0	0	0	0	0	0	0	0	0	0	0	0	0	0	0	0	0	0	0	0	0	0	0	0	0.00739	0	0	0	0	0	0	0	0	0	0	0	0	0	0	0	0	0	0	0	0	0	0.05795	0	0
d__Fungi|p__Ascomycota|c__Sordariomycetes|o__Hypocreales|f__Nectriaceae|g__Nectriaceae_unclassified|s__Nectriaceae_unclassified	0	0	0	0	0	0	0	0	0	0	0	0	0	0	0	0	0	0	0	0	0	0	0	0	0.00739	0	0	0	0	0	0	0	0	0	0	0	0	0	0	0	0	0	0	0	0	0	0.05795	0	0
d__Fungi|p__Ascomycota|c__Sordariomycetes|o__Hypocreales|f__Nectriaceae|g__Nectria|s__Fusarium_oxysporum_f_sp_psidii	0	0	0	0	0	0	0	0	0	0.02839	0	0	0	0	1.44552	0	0	0	0	0	0	0	0.02135	0	0.00739	0.01411	0	0	0	0	0	0	0	0	0	0	0	0	0.01522	0	0	0	0	0	0	0	3.27329	0	0
d__Fungi|p__Ascomycota|c__Sordariomycetes|o__Hypocreales|f__Nectriaceae|g__Nectria|s__Nectria_haematococca_mpVI	0	0	0	0	0	0	0	0	0	0	0	0	0	0	0	0	0	0	0	0	0	0	0.01256	0	0	0	0	0	0	0	0	0	0	0	0	0	0	0	0	0	0	0	0	0	0	0	0.26014	0	0
d__Fungi|p__Ascomycota|c__Sordariomycetes|o__Hypocreales|f__Nectriaceae|g__Nectria|s__Nectria_unclassified	0	0	0	0	0	0	0	0	0	0	0	0	0	0	0	0	0	0	0	0	0	0	0	0	0	0	0	0	0	0	0	0	0	0	0	0	0	0	0	0	0	0	0	0	0	0	0.02219	0	0
d__Fungi|p__Ascomycota|c__Sordariomycetes|o__Hypocreales|f__Nectriaceae|g__Neonectria	0	0	0	0	0	0	0	0	0	0	0	0	0	0	0	0	0	0	0.00251	0	0	0	0	0	0.0037	0.00641	0	0	0	0	0	0	0.00257	0	0	0	0	0	0	0	0	0	0	0	0	0	0.26014	0	0
d__Fungi|p__Ascomycota|c__Sordariomycetes|o__Hypocreales|f__Nectriaceae|g__Neonectria|s__Cylindrocarpon_didymum	0	0	0	0	0	0	0	0	0	0	0	0	0	0	0	0	0	0	0.00251	0	0	0	0	0	0	0	0	0	0	0	0	0	0.00257	0	0	0	0	0	0	0	0	0	0	0	0	0	0.11219	0	0
d__Fungi|p__Ascomycota|c__Sordariomycetes|o__Hypocreales|f__Nectriaceae|g__Neonectria|s__Ilyonectria_estremocensis	0	0	0	0	0	0	0	0	0	0	0	0	0	0	0	0	0	0	0	0	0	0	0	0	0	0	0	0	0	0	0	0	0	0	0	0	0	0	0	0	0	0	0	0	0	0	0.0111	0	0
d__Fungi|p__Ascomycota|c__Sordariomycetes|o__Hypocreales|f__Nectriaceae|g__Neonectria|s__Ilyonectria_macrodidyma	0	0	0	0	0	0	0	0	0	0	0	0	0	0	0	0	0	0	0	0	0	0	0	0	0.0037	0.00641	0	0	0	0	0	0	0	0	0	0	0	0	0	0	0	0	0	0	0	0	0.01356	0	0
d__Fungi|p__Ascomycota|c__Sordariomycetes|o__Hypocreales|f__Nectriaceae|g__Neonectria|s__Nectria_lugdunensis	0	0	0	0	0	0	0	0	0	0	0	0	0	0	0	0	0	0	0	0	0	0	0	0	0	0	0	0	0	0	0	0	0	0	0	0	0	0	0	0	0	0	0	0	0	0	0.07644	0	0
d__Fungi|p__Ascomycota|c__Sordariomycetes|o__Hypocreales|f__Nectriaceae|g__Neonectria|s__Neonectria_sp_JL_2009b	0	0	0	0	0	0	0	0	0	0	0	0	0	0	0	0	0	0	0	0	0	0	0	0	0	0	0	0	0	0	0	0	0	0	0	0	0	0	0	0	0	0	0	0	0	0	0.01726	0	0
d__Fungi|p__Ascomycota|c__Sordariomycetes|o__Hypocreales|f__Nectriaceae|g__Neonectria|s__Neonectria_unclassified	0	0	0	0	0	0	0	0	0	0	0	0	0	0	0	0	0	0	0	0	0	0	0	0	0	0	0	0	0	0	0	0	0	0	0	0	0	0	0	0	0	0	0	0	0	0	0.01849	0	0
d__Fungi|p__Ascomycota|c__Sordariomycetes|o__Hypocreales|f__Nectriaceae|g__Neonectria|s__uncultured_Neonectria	0	0	0	0	0	0	0	0	0	0	0	0	0	0	0	0	0	0	0	0	0	0	0	0	0	0	0	0	0	0	0	0	0	0	0	0	0	0	0	0	0	0	0	0	0	0	0.0111	0	0
d__Fungi|p__Ascomycota|c__Sordariomycetes|o__Hypocreales|f__Nectriaceae|g__Paracremonium	0	0	0	0	0	0	0	0	0	0	0	0	0	0	0	0	0	0	0	0	0	0	0	0	0	0	0	0	0	0	0	0	0	0	0	0	0	0	0	0	0	0	0	0	0	0	0.07521	0	0
d__Fungi|p__Ascomycota|c__Sordariomycetes|o__Hypocreales|f__Nectriaceae|g__Paracremonium|s__Paracremonium_unclassified	0	0	0	0	0	0	0	0	0	0	0	0	0	0	0	0	0	0	0	0	0	0	0	0	0	0	0	0	0	0	0	0	0	0	0	0	0	0	0	0	0	0	0	0	0	0	0.07521	0	0
d__Fungi|p__Ascomycota|c__Sordariomycetes|o__Hypocreales|f__Nectriaceae|g__Viridispora	0	0	0	0	0	0	0	0	0	0	0	0	0	0	0	0	0	0	0	0	0	0	0.00377	0	0	0	0	0	0	0	0	0	0	0	0	0	0	0	0	0	0	0	0	0	0	0	0	0	0
d__Fungi|p__Ascomycota|c__Sordariomycetes|o__Hypocreales|f__Nectriaceae|g__Viridispora|s__Viridispora_unclassified	0	0	0	0	0	0	0	0	0	0	0	0	0	0	0	0	0	0	0	0	0	0	0.00377	0	0	0	0	0	0	0	0	0	0	0	0	0	0	0	0	0	0	0	0	0	0	0	0	0	0
d__Fungi|p__Ascomycota|c__Sordariomycetes|o__Hypocreales|f__Nectriaceae|g__Volutella	0	0	0	0	0	0	0	0	0	0	0	0	0	0	0	0	0	0	0	0	0	0	0	0	0	0	0	0	0	0	0	0	0	0	0	0	0	0	0	0	0	0	0	0	0	0	0.02342	0	0
d__Fungi|p__Ascomycota|c__Sordariomycetes|o__Hypocreales|f__Nectriaceae|g__Volutella|s__Volutella_ciliata	0	0	0	0	0	0	0	0	0	0	0	0	0	0	0	0	0	0	0	0	0	0	0	0	0	0	0	0	0	0	0	0	0	0	0	0	0	0	0	0	0	0	0	0	0	0	0.02342	0	0
d__Fungi|p__Ascomycota|c__Sordariomycetes|o__Hypocreales|f__Nectriaceae|g__Volutella|s__Volutella_consors	0	0	0	0	0	0	0	0	0	0	0	0	0	0	0	0	0	0	0	0	0	0	0	0	0	0	0	0	0	0	0	0	0	0	0	0	0	0	0	0	0	0	0	0	0	0	0	0	0
d__Fungi|p__Ascomycota|c__Sordariomycetes|o__Hypocreales|f__Niessliaceae	0	0	0	0	0	0	0	0	0	0	0	0	0	0	0	0	0	0	0	0	0	0	0	0	0	0	0	0	0	0	0	0	0	0	0	0	0	0	0	0	0	0	0	0	0	0	0	0	0
d__Fungi|p__Ascomycota|c__Sordariomycetes|o__Hypocreales|f__Niessliaceae|g__Eucasphaeria	0	0	0	0	0	0	0	0	0	0	0	0	0	0	0	0	0	0	0	0	0	0	0	0	0	0	0	0	0	0	0	0	0	0	0	0	0	0	0	0	0	0	0	0	0	0	0	0	0
d__Fungi|p__Ascomycota|c__Sordariomycetes|o__Hypocreales|f__Niessliaceae|g__Eucasphaeria|s__Eucasphaeria_unclassified	0	0	0	0	0	0	0	0	0	0	0	0	0	0	0	0	0	0	0	0	0	0	0	0	0	0	0	0	0	0	0	0	0	0	0	0	0	0	0	0	0	0	0	0	0	0	0	0	0
d__Fungi|p__Ascomycota|c__Sordariomycetes|o__Hypocreales|f__Ophiocordycipitaceae	0	0	0	0.0073	0.00256	0	22.4752	0.00378	0	0	0	0	0	0	0	0	0	0	0	0	0	0	0	0	0	0	0	0	0	0	0.00242	0	0	0	0	0	0	0	0	0	0	0	0	0	0	0	0	0	0
d__Fungi|p__Ascomycota|c__Sordariomycetes|o__Hypocreales|f__Ophiocordycipitaceae|g__Ophiocordyceps	0	0	0	0.0073	0.00256	0	22.4752	0.00378	0	0	0	0	0	0	0	0	0	0	0	0	0	0	0	0	0	0	0	0	0	0	0.00242	0	0	0	0	0	0	0	0	0	0	0	0	0	0	0	0	0	0
d__Fungi|p__Ascomycota|c__Sordariomycetes|o__Hypocreales|f__Ophiocordycipitaceae|g__Ophiocordyceps|s__Ophiocordyceps_unclassified	0	0	0	0.0073	0.00256	0	22.4752	0.00378	0	0	0	0	0	0	0	0	0	0	0	0	0	0	0	0	0	0	0	0	0	0	0.00242	0	0	0	0	0	0	0	0	0	0	0	0	0	0	0	0	0	0
d__Fungi|p__Ascomycota|c__Sordariomycetes|o__Hypocreales|f__Stachybotryaceae	0	0	0	0	0	0	0.06258	0	0	0	0	0	0	0.00667	0	0	0	0	0	0	0	0	0	0	0	0	0	0	0	0	0.00727	0	0	0	0	0	0	0	0	0	0	0	0	0	0	0	0	0	0
d__Fungi|p__Ascomycota|c__Sordariomycetes|o__Hypocreales|f__Stachybotryaceae|g__Stachybotrys	0	0	0	0	0	0	0.06258	0	0	0	0	0	0	0.00667	0	0	0	0	0	0	0	0	0	0	0	0	0	0	0	0	0.00727	0	0	0	0	0	0	0	0	0	0	0	0	0	0	0	0	0	0
d__Fungi|p__Ascomycota|c__Sordariomycetes|o__Hypocreales|f__Stachybotryaceae|g__Stachybotrys|s__Stachybotrys_unclassified	0	0	0	0	0	0	0.06258	0	0	0	0	0	0	0.00667	0	0	0	0	0	0	0	0	0	0	0	0	0	0	0	0	0.00727	0	0	0	0	0	0	0	0	0	0	0	0	0	0	0	0	0	0
d__Fungi|p__Ascomycota|c__Sordariomycetes|o__Lulworthiales	0	0	0	0	0	0	0	0	0	0	0	0	0	0	0	0	0	0	0	0	0	0	0	0	0	0	0	0	0	0	0	0	0	0	0	0	0	0	0	0	0	0	0	0	0	0	0	0	0
d__Fungi|p__Ascomycota|c__Sordariomycetes|o__Lulworthiales|f__Lulworthiaceae	0	0	0	0	0	0	0	0	0	0	0	0	0	0	0	0	0	0	0	0	0	0	0	0	0	0	0	0	0	0	0	0	0	0	0	0	0	0	0	0	0	0	0	0	0	0	0	0	0
d__Fungi|p__Ascomycota|c__Sordariomycetes|o__Lulworthiales|f__Lulworthiaceae|g__Zalerion	0	0	0	0	0	0	0	0	0	0	0	0	0	0	0	0	0	0	0	0	0	0	0	0	0	0	0	0	0	0	0	0	0	0	0	0	0	0	0	0	0	0	0	0	0	0	0	0	0
d__Fungi|p__Ascomycota|c__Sordariomycetes|o__Lulworthiales|f__Lulworthiaceae|g__Zalerion|s__Zalerion_arboricola	0	0	0	0	0	0	0	0	0	0	0	0	0	0	0	0	0	0	0	0	0	0	0	0	0	0	0	0	0	0	0	0	0	0	0	0	0	0	0	0	0	0	0	0	0	0	0	0	0
d__Fungi|p__Ascomycota|c__Sordariomycetes|o__Microascales	0	0	4.52883	0.02922	4.46744	40.5251	0.09194	68.2057	82.4446	0	0.01196	0.03374	0.02275	0	0.01117	0.00729	0.01613	0.7017	0.0113	0.02801	0	0.01174	0.0113	0.15617	0.00493	0.0449	0.01317	0.00908	0	0.00533	0	0.03946	0.05652	0.27223	0.04243	13.0346	0.00457	0.0182	0.61448	21.1287	0.07609	11.0726	1.84158	0.03087	0.26167	0.00492	0.04808	14.5474	0.23283
d__Fungi|p__Ascomycota|c__Sordariomycetes|o__Microascales|f__Microascaceae	0	0	4.52883	0.02922	4.46744	40.5251	0.09194	68.2057	82.4446	0	0.01196	0.03374	0.02275	0	0.01117	0.00729	0.01613	0.7017	0.0113	0.02801	0	0.01174	0.0113	0.15617	0.00493	0.0449	0.01317	0.00908	0	0.00533	0	0.03946	0.05652	0.27223	0.04243	13.0346	0.00457	0.0182	0.61448	21.1287	0.07609	11.0726	1.84158	0.03087	0.26167	0.00492	0.04808	14.5474	0.23283
d__Fungi|p__Ascomycota|c__Sordariomycetes|o__Microascales|f__Microascaceae|g__Acaulium	0	0	0	0	0	0	0	0	0	0	0	0	0	0	0	0	0	0	0	0	0	0	0	0	0	0	0	0	0	0	0	0	0	0	0	0	0	0	0	0	0	0	0	0	0	0	0	0	0
d__Fungi|p__Ascomycota|c__Sordariomycetes|o__Microascales|f__Microascaceae|g__Acaulium|s__Acaulium_acremonium	0	0	0	0	0	0	0	0	0	0	0	0	0	0	0	0	0	0	0	0	0	0	0	0	0	0	0	0	0	0	0	0	0	0	0	0	0	0	0	0	0	0	0	0	0	0	0	0	0
d__Fungi|p__Ascomycota|c__Sordariomycetes|o__Microascales|f__Microascaceae|g__Cephalotrichum	0	0	0	0	0	0	0	0	0	0	0	0.00649	0.00669	0	0	0	0	0	0	0	0	0.0044	0	0	0	0	0.00359	0.00259	0	0	0	0	0.00514	0	0	0	0	0	0	0	0.00634	0.00621	0	0	0	0	0.01356	0	0.00571
d__Fungi|p__Ascomycota|c__Sordariomycetes|o__Microascales|f__Microascaceae|g__Cephalotrichum|s__Doratomyces_microsporus	0	0	0	0	0	0	0	0	0	0	0	0	0	0	0	0	0	0	0	0	0	0	0	0	0	0	0	0	0	0	0	0	0	0	0	0	0	0	0	0	0	0	0	0	0	0	0.0074	0	0
d__Fungi|p__Ascomycota|c__Sordariomycetes|o__Microascales|f__Microascaceae|g__Cephalotrichum|s__Doratomyces_nanus	0	0	0	0	0	0	0	0	0	0	0	0.00649	0.00669	0	0	0	0	0	0	0	0	0.0044	0	0	0	0	0.00359	0.00259	0	0	0	0	0.00514	0	0	0	0	0	0	0	0.00634	0.00621	0	0	0	0	0.00616	0	0.00571
d__Fungi|p__Ascomycota|c__Sordariomycetes|o__Microascales|f__Microascaceae|g__Graphium	0	0	0	0	0	0	0	0	0	0	0	0	0	0	0	0	0	0	0	0	0	0	0	0	0	0	0	0	0	0	0	0	0	0	0	0	0	0	0	0	0	0	0	0	0	0	0	0	0
d__Fungi|p__Ascomycota|c__Sordariomycetes|o__Microascales|f__Microascaceae|g__Graphium|s__Graphium_putredinis	0	0	0	0	0	0	0	0	0	0	0	0	0	0	0	0	0	0	0	0	0	0	0	0	0	0	0	0	0	0	0	0	0	0	0	0	0	0	0	0	0	0	0	0	0	0	0	0	0
d__Fungi|p__Ascomycota|c__Sordariomycetes|o__Microascales|f__Microascaceae|g__Microascaceae_unclassified	0	0	0	0	0	0	0	0.00378	0	0	0	0.00389	0.00268	0	0	0	0	0	0.00628	0.00244	0	0	0	0	0	0	0	0	0	0	0	0	0	0	0	0	0	0.0104	0	0	0	0	0	0	0	0	0.00986	0	0
d__Fungi|p__Ascomycota|c__Sordariomycetes|o__Microascales|f__Microascaceae|g__Microascaceae_unclassified|s__Microascaceae_unclassified	0	0	0	0	0	0	0	0.00378	0	0	0	0.00389	0.00268	0	0	0	0	0	0.00628	0.00244	0	0	0	0	0	0	0	0	0	0	0	0	0	0	0	0	0	0.0104	0	0	0	0	0	0	0	0	0.00986	0	0
d__Fungi|p__Ascomycota|c__Sordariomycetes|o__Microascales|f__Microascaceae|g__Microascus	0	0	4.52883	0.02922	4.46744	40.5251	0.09194	68.2019	82.4446	0	0.01196	0.02336	0.01338	0	0.01117	0.00729	0.01613	0.7017	0.00502	0.02557	0	0.00734	0.0113	0.15617	0.00493	0.0449	0.00958	0.00649	0	0.00533	0	0.03348	0.05138	0.27223	0.04243	13.0346	0.00457	0.0078	0.61448	21.1287	0.06975	11.0664	1.84158	0.03087	0.26167	0.00492	0.00247	14.5474	0.22712
d__Fungi|p__Ascomycota|c__Sordariomycetes|o__Microascales|f__Microascaceae|g__Microascus|s__Microascus_manginii	0	0	0	0	0	0.079	0.01532	9.86091	1.23164	0	0	0	0	0	0	0	0	0	0	0	0	0	0	0	0	0	0	0	0	0	0	0	0	0	0	0	0	0	0	0	0	0	0	0	0.03489	0	0	0	0
d__Fungi|p__Ascomycota|c__Sordariomycetes|o__Microascales|f__Microascaceae|g__Microascus|s__Microascus_trigonosporus	0	0	0	0	0	0.01063	0	0	0.17873	0	0	0	0	0	0	0	0	0.67281	0	0	0	0	0	0	0	0	0	0	0	0	0	0	0	0	0	0	0	0	0	0.06386	0	0	0	0	0	0	0.00247	0	0
d__Fungi|p__Ascomycota|c__Sordariomycetes|o__Microascales|f__Microascaceae|g__Microascus|s__Microascus_unclassified	0	0	0	0	0	0	0	0	0.96659	0	0	0	0	0	0	0	0	0	0	0	0	0	0	0	0	0	0	0	0	0	0	0	0	0	0	0	0	0	0	0	0	0	0	0	0	0	0	0	0
d__Fungi|p__Ascomycota|c__Sordariomycetes|o__Microascales|f__Microascaceae|g__Microascus|s__Scopulariopsis_brevicaulis	0	0	4.52883	0.02922	4.46744	40.4354	0.07662	58.341	80.0676	0	0.01196	0.02336	0.01338	0	0.01117	0.00729	0.01613	0.02889	0.00502	0.02557	0	0.00734	0.0113	0.15617	0.00493	0.0449	0.00958	0.00649	0	0.00533	0	0.03348	0.05138	0.27223	0.04243	13.0346	0.00457	0.0078	0.61448	21.0649	0.06975	11.0664	1.84158	0.03087	0.22678	0.00492	0	14.5474	0.22712
d__Fungi|p__Ascomycota|c__Sordariomycetes|o__Microascales|f__Microascaceae|g__Pseudallescheria	0	0	0	0	0	0	0	0	0	0	0	0	0	0	0	0	0	0	0	0	0	0	0	0	0	0	0	0	0	0	0	0	0	0	0	0	0	0	0	0	0	0	0	0	0	0	0	0	0
d__Fungi|p__Ascomycota|c__Sordariomycetes|o__Microascales|f__Microascaceae|g__Pseudallescheria|s__Pseudallescheria_unclassified	0	0	0	0	0	0	0	0	0	0	0	0	0	0	0	0	0	0	0	0	0	0	0	0	0	0	0	0	0	0	0	0	0	0	0	0	0	0	0	0	0	0	0	0	0	0	0	0	0
d__Fungi|p__Ascomycota|c__Sordariomycetes|o__Microascales|f__Microascaceae|g__Scedosporium	0	0	0	0	0	0	0	0	0	0	0	0	0	0	0	0	0	0	0	0	0	0	0	0	0	0	0	0	0	0	0	0.00598	0	0	0	0	0	0	0	0	0	0	0	0	0	0	0.02219	0	0
d__Fungi|p__Ascomycota|c__Sordariomycetes|o__Microascales|f__Microascaceae|g__Scedosporium|s__Scedosporium_dehoogii	0	0	0	0	0	0	0	0	0	0	0	0	0	0	0	0	0	0	0	0	0	0	0	0	0	0	0	0	0	0	0	0.00598	0	0	0	0	0	0	0	0	0	0	0	0	0	0	0	0	0
d__Fungi|p__Ascomycota|c__Sordariomycetes|o__Microascales|f__Microascaceae|g__Scedosporium|s__Scedosporium_prolificans	0	0	0	0	0	0	0	0	0	0	0	0	0	0	0	0	0	0	0	0	0	0	0	0	0	0	0	0	0	0	0	0	0	0	0	0	0	0	0	0	0	0	0	0	0	0	0.02219	0	0
d__Fungi|p__Ascomycota|c__Sordariomycetes|o__Microascales|f__Microascaceae|g__Wardomyces	0	0	0	0	0	0	0	0	0	0	0	0	0	0	0	0	0	0	0	0	0	0	0	0	0	0	0	0	0	0	0	0	0	0	0	0	0	0	0	0	0	0	0	0	0	0	0	0	0
d__Fungi|p__Ascomycota|c__Sordariomycetes|o__Microascales|f__Microascaceae|g__Wardomyces|s__Wardomyces_inflatus	0	0	0	0	0	0	0	0	0	0	0	0	0	0	0	0	0	0	0	0	0	0	0	0	0	0	0	0	0	0	0	0	0	0	0	0	0	0	0	0	0	0	0	0	0	0	0	0	0
d__Fungi|p__Ascomycota|c__Sordariomycetes|o__Myrmecridiales	0	0	0	0	0	0	0	0	0	0	0	0	0	0	0	0	0	0	0	0	0	0	0	0	0	0	0	0	0	0	0	0	0	0	0	0	0	0	0	0	0	0	0	0	0	0	0.00616	0	0
d__Fungi|p__Ascomycota|c__Sordariomycetes|o__Myrmecridiales|f__Myrmecridiales_unclassified	0	0	0	0	0	0	0	0	0	0	0	0	0	0	0	0	0	0	0	0	0	0	0	0	0	0	0	0	0	0	0	0	0	0	0	0	0	0	0	0	0	0	0	0	0	0	0.00616	0	0
d__Fungi|p__Ascomycota|c__Sordariomycetes|o__Myrmecridiales|f__Myrmecridiales_unclassified|g__Myrmecridiales_unclassified	0	0	0	0	0	0	0	0	0	0	0	0	0	0	0	0	0	0	0	0	0	0	0	0	0	0	0	0	0	0	0	0	0	0	0	0	0	0	0	0	0	0	0	0	0	0	0.00616	0	0
d__Fungi|p__Ascomycota|c__Sordariomycetes|o__Myrmecridiales|f__Myrmecridiales_unclassified|g__Myrmecridiales_unclassified|s__Myrmecridiales_unclassified	0	0	0	0	0	0	0	0	0	0	0	0	0	0	0	0	0	0	0	0	0	0	0	0	0	0	0	0	0	0	0	0	0	0	0	0	0	0	0	0	0	0	0	0	0	0	0.00616	0	0
d__Fungi|p__Ascomycota|c__Sordariomycetes|o__Ophiostomatales	0	0	0	0	0	0	0	0	0	0	0	0	0	0	0	0	0	0	0	0	0	0	0	0	0	0	0	0	0	0	0	0	0	0	0	0	0	0	0	0	0	0	0	0	0	0	0	0	0
d__Fungi|p__Ascomycota|c__Sordariomycetes|o__Ophiostomatales|f__Ophiostomataceae	0	0	0	0	0	0	0	0	0	0	0	0	0	0	0	0	0	0	0	0	0	0	0	0	0	0	0	0	0	0	0	0	0	0	0	0	0	0	0	0	0	0	0	0	0	0	0	0	0
d__Fungi|p__Ascomycota|c__Sordariomycetes|o__Ophiostomatales|f__Ophiostomataceae|g__Sporothrix	0	0	0	0	0	0	0	0	0	0	0	0	0	0	0	0	0	0	0	0	0	0	0	0	0	0	0	0	0	0	0	0	0	0	0	0	0	0	0	0	0	0	0	0	0	0	0	0	0
d__Fungi|p__Ascomycota|c__Sordariomycetes|o__Ophiostomatales|f__Ophiostomataceae|g__Sporothrix|s__Sporothrix_lignivora	0	0	0	0	0	0	0	0	0	0	0	0	0	0	0	0	0	0	0	0	0	0	0	0	0	0	0	0	0	0	0	0	0	0	0	0	0	0	0	0	0	0	0	0	0	0	0	0	0
d__Fungi|p__Ascomycota|c__Sordariomycetes|o__Sordariales	0	0.15314	0.05578	0.02922	4.82171	14.2006	0.01022	0	0	0	5.32813	2.32314	18.9507	0.01201	0	0	0	0	0.32647	0.04141	0	7.97293	0.01004	0.01775	0.00616	0.15778	0.03353	0.27373	0	6.38364	0.00363	0	8.0501	1.15821	0.23835	0	0.00457	0.02211	0.19652	0	13.3125	0.02235	0.00247	2.31616	0.16448	0	9.84699	10.0006	3.62964
d__Fungi|p__Ascomycota|c__Sordariomycetes|o__Sordariales|f__Cephalothecaceae	0	0	0.04929	0.01583	4.82171	0	0.01022	0	0	0	5.31856	2.31146	18.9413	0.00801	0	0	0	0	0.31266	0.01827	0	7.97293	0	0	0.00246	0	0.01078	0.25816	0	6.36364	0	0	8.02441	0.01008	0.23461	0	0.00457	0.02211	0	0	13.272	0.01242	0.00247	2.30258	0	0	0	10.0006	3.51822
d__Fungi|p__Ascomycota|c__Sordariomycetes|o__Sordariales|f__Cephalothecaceae|g__Cephalotheca	0	0	0	0	0	0	0	0	0	0	0	0	0	0	0	0	0	0	0	0	0	0	0	0	0.00246	0	0	0	0	0	0	0	0	0	0	0	0	0	0	0	0	0	0	0	0	0	0	0	0
d__Fungi|p__Ascomycota|c__Sordariomycetes|o__Sordariales|f__Cephalothecaceae|g__Cephalothecaceae_unclassified	0	0	0.00259	0	0	0	0	0	0	0	4.43333	0	0	0	0	0	0	0	0	0	0	0	0	0	0	0	0	0	0	0	0	0	0	0	0	0	0	0	0	0	0	0	0	0	0	0	0	0	0
d__Fungi|p__Ascomycota|c__Sordariomycetes|o__Sordariales|f__Cephalothecaceae|g__Cephalothecaceae_unclassified|s__Cephalothecaceae_unclassified	0	0	0.00259	0	0	0	0	0	0	0	4.43333	0	0	0	0	0	0	0	0	0	0	0	0	0	0	0	0	0	0	0	0	0	0	0	0	0	0	0	0	0	0	0	0	0	0	0	0	0	0
d__Fungi|p__Ascomycota|c__Sordariomycetes|o__Sordariales|f__Cephalothecaceae|g__Cephalotheca|s__Cephalotheca_sulfurea	0	0	0	0	0	0	0	0	0	0	0	0	0	0	0	0	0	0	0	0	0	0	0	0	0	0	0	0	0	0	0	0	0	0	0	0	0	0	0	0	0	0	0	0	0	0	0	0	0
d__Fungi|p__Ascomycota|c__Sordariomycetes|o__Sordariales|f__Cephalothecaceae|g__Cephalotheca|s__Cephalotheca_unclassified	0	0	0	0	0	0	0	0	0	0	0	0	0	0	0	0	0	0	0	0	0	0	0	0	0.00246	0	0	0	0	0	0	0	0	0	0	0	0	0	0	0	0	0	0	0	0	0	0	0	0
d__Fungi|p__Ascomycota|c__Sordariomycetes|o__Sordariales|f__Cephalothecaceae|g__Phialemonium	0	0	0.0467	0.01583	4.82171	0	0.01022	0	0	0	0.88523	2.31146	18.9413	0.00801	0	0	0	0	0.31266	0.01827	0	7.97293	0	0	0	0	0.01078	0.25816	0	6.36364	0	0	8.02441	0.01008	0.23461	0	0.00457	0.02211	0	0	13.272	0.01242	0.00247	2.30258	0	0	0	10.0006	3.51822
d__Fungi|p__Ascomycota|c__Sordariomycetes|o__Sordariales|f__Cephalothecaceae|g__Phialemonium|s__Phialemonium_curvatum	0	0	0.0467	0.01583	4.82171	0	0.01022	0	0	0	0.88523	2.31146	18.9413	0.00801	0	0	0	0	0.31266	0.01827	0	7.97293	0	0	0	0	0.01078	0.25816	0	6.36364	0	0	8.02441	0.01008	0.23461	0	0.00457	0.02211	0	0	13.272	0.01242	0.00247	2.30258	0	0	0	10.0006	3.51822
d__Fungi|p__Ascomycota|c__Sordariomycetes|o__Sordariales|f__Chaetomiaceae	0	0	0.00649	0.00852	0	9.57293	0	0	0	0	0.00957	0.00519	0.00937	0.004	0	0	0	0	0.01381	0.01705	0	0	0	0.00828	0	0.01924	0.01676	0.00649	0	0.012	0	0	0.02055	1.14435	0	0	0	0	0.19652	0	0.04058	0.00993	0	0.00741	0.16448	0	9.72987	0	0.10142
d__Fungi|p__Ascomycota|c__Sordariomycetes|o__Sordariales|f__Chaetomiaceae|g__Chaetomiaceae_unclassified	0	0	0	0	0	0.30993	0	0	0	0	0	0	0	0	0	0	0	0	0	0	0	0	0	0	0	0	0	0	0	0	0	0	0	0	0	0	0	0	0	0	0	0	0	0	0	0	0.01603	0	0
d__Fungi|p__Ascomycota|c__Sordariomycetes|o__Sordariales|f__Chaetomiaceae|g__Chaetomiaceae_unclassified|s__Chaetomiaceae_unclassified	0	0	0	0	0	0.30993	0	0	0	0	0	0	0	0	0	0	0	0	0	0	0	0	0	0	0	0	0	0	0	0	0	0	0	0	0	0	0	0	0	0	0	0	0	0	0	0	0.01603	0	0
d__Fungi|p__Ascomycota|c__Sordariomycetes|o__Sordariales|f__Chaetomiaceae|g__Chaetomium	0	0	0	0	0	0	0	0	0	0	0	0	0	0	0	0	0	0	0	0	0	0	0	0.00828	0	0	0	0	0	0	0	0	0	1.13805	0	0	0	0	0	0	0	0	0	0	0	0	0.54493	0	0
d__Fungi|p__Ascomycota|c__Sordariomycetes|o__Sordariales|f__Chaetomiaceae|g__Chaetomium|s__Chaetomium_carinthiacum	0	0	0	0	0	0	0	0	0	0	0	0	0	0	0	0	0	0	0	0	0	0	0	0	0	0	0	0	0	0	0	0	0	1.13805	0	0	0	0	0	0	0	0	0	0	0	0	0	0	0
d__Fungi|p__Ascomycota|c__Sordariomycetes|o__Sordariales|f__Chaetomiaceae|g__Chaetomium|s__Chaetomium_erectum	0	0	0	0	0	0	0	0	0	0	0	0	0	0	0	0	0	0	0	0	0	0	0	0	0	0	0	0	0	0	0	0	0	0	0	0	0	0	0	0	0	0	0	0	0	0	0	0	0
d__Fungi|p__Ascomycota|c__Sordariomycetes|o__Sordariales|f__Chaetomiaceae|g__Chaetomium|s__Chaetomium_funicola	0	0	0	0	0	0	0	0	0	0	0	0	0	0	0	0	0	0	0	0	0	0	0	0	0	0	0	0	0	0	0	0	0	0	0	0	0	0	0	0	0	0	0	0	0	0	0	0	0
d__Fungi|p__Ascomycota|c__Sordariomycetes|o__Sordariales|f__Chaetomiaceae|g__Chaetomium|s__Chaetomium_globosum	0	0	0	0	0	0	0	0	0	0	0	0	0	0	0	0	0	0	0	0	0	0	0	0.00828	0	0	0	0	0	0	0	0	0	0	0	0	0	0	0	0	0	0	0	0	0	0	0	0	0
d__Fungi|p__Ascomycota|c__Sordariomycetes|o__Sordariales|f__Chaetomiaceae|g__Chaetomium|s__Chaetomium_grande	0	0	0	0	0	0	0	0	0	0	0	0	0	0	0	0	0	0	0	0	0	0	0	0	0	0	0	0	0	0	0	0	0	0	0	0	0	0	0	0	0	0	0	0	0	0	0.00616	0	0
d__Fungi|p__Ascomycota|c__Sordariomycetes|o__Sordariales|f__Chaetomiaceae|g__Chaetomium|s__Chaetomium_nigricolor	0	0	0	0	0	0	0	0	0	0	0	0	0	0	0	0	0	0	0	0	0	0	0	0	0	0	0	0	0	0	0	0	0	0	0	0	0	0	0	0	0	0	0	0	0	0	0.51411	0	0
d__Fungi|p__Ascomycota|c__Sordariomycetes|o__Sordariales|f__Chaetomiaceae|g__Chaetomium|s__Chaetomium_unclassified	0	0	0	0	0	0	0	0	0	0	0	0	0	0	0	0	0	0	0	0	0	0	0	0	0	0	0	0	0	0	0	0	0	0	0	0	0	0	0	0	0	0	0	0	0	0	0	0	0
d__Fungi|p__Ascomycota|c__Sordariomycetes|o__Sordariales|f__Chaetomiaceae|g__Chaetomium|s__Chaetomium_variosporum	0	0	0	0	0	0	0	0	0	0	0	0	0	0	0	0	0	0	0	0	0	0	0	0	0	0	0	0	0	0	0	0	0	0	0	0	0	0	0	0	0	0	0	0	0	0	0.02466	0	0
d__Fungi|p__Ascomycota|c__Sordariomycetes|o__Sordariales|f__Chaetomiaceae|g__Humicola	0	0	0.00649	0	0	0	0	0	0	0	0	0	0	0	0	0	0	0	0	0	0	0	0	0	0	0.01924	0	0	0	0	0	0	0	0	0	0	0	0	0.19652	0	0	0	0	0	0.16448	0	9.08508	0	0
d__Fungi|p__Ascomycota|c__Sordariomycetes|o__Sordariales|f__Chaetomiaceae|g__Humicola|s__Humicola_fuscoatra	0	0	0	0	0	0	0	0	0	0	0	0	0	0	0	0	0	0	0	0	0	0	0	0	0	0	0	0	0	0	0	0	0	0	0	0	0	0	0.19652	0	0	0	0	0	0	0	0.38589	0	0
d__Fungi|p__Ascomycota|c__Sordariomycetes|o__Sordariales|f__Chaetomiaceae|g__Humicola|s__Humicola_unclassified	0	0	0	0	0	0	0	0	0	0	0	0	0	0	0	0	0	0	0	0	0	0	0	0	0	0	0	0	0	0	0	0	0	0	0	0	0	0	0	0	0	0	0	0	0.16448	0	0.00247	0	0
d__Fungi|p__Ascomycota|c__Sordariomycetes|o__Sordariales|f__Chaetomiaceae|g__Humicola|s__Trichocladium_asperum	0	0	0.00649	0	0	0	0	0	0	0	0	0	0	0	0	0	0	0	0	0	0	0	0	0	0	0.01924	0	0	0	0	0	0	0	0	0	0	0	0	0	0	0	0	0	0	0	0	8.69672	0	0
d__Fungi|p__Ascomycota|c__Sordariomycetes|o__Sordariales|f__Chaetomiaceae|g__Thielavia	0	0	0	0.00852	0	9.263	0	0	0	0	0.00957	0.00519	0.00937	0.004	0	0	0	0	0.01381	0.01705	0	0	0	0	0	0	0.01676	0.00649	0	0.012	0	0	0.02055	0.0063	0	0	0	0	0	0	0.04058	0.00993	0	0.00741	0	0	0.06041	0	0.10142
d__Fungi|p__Ascomycota|c__Sordariomycetes|o__Sordariales|f__Chaetomiaceae|g__Thielavia|s__Thielavia_hyalocarpa	0	0	0	0.00852	0	9.263	0	0	0	0	0.00957	0.00519	0.00937	0.004	0	0	0	0	0.01381	0.01705	0	0	0	0	0	0	0.01676	0.00649	0	0.012	0	0	0.02055	0.0063	0	0	0	0	0	0	0.04058	0.00993	0	0.00741	0	0	0.06041	0	0.10142
d__Fungi|p__Ascomycota|c__Sordariomycetes|o__Sordariales|f__Chaetomiaceae|g__Trichocladium	0	0	0	0	0	0	0	0	0	0	0	0	0	0	0	0	0	0	0	0	0	0	0	0	0	0	0	0	0	0	0	0	0	0	0	0	0	0	0	0	0	0	0	0	0	0	0.02342	0	0
d__Fungi|p__Ascomycota|c__Sordariomycetes|o__Sordariales|f__Chaetomiaceae|g__Trichocladium|s__Trichocladium_opacum	0	0	0	0	0	0	0	0	0	0	0	0	0	0	0	0	0	0	0	0	0	0	0	0	0	0	0	0	0	0	0	0	0	0	0	0	0	0	0	0	0	0	0	0	0	0	0.02342	0	0
d__Fungi|p__Ascomycota|c__Sordariomycetes|o__Sordariales|f__Lasiosphaeriaceae	0	0.15314	0	0.00487	0	0	0	0	0	0	0	0.00649	0	0	0	0	0	0	0	0.00609	0	0	0.00753	0	0	0.1334	0.00599	0.00908	0	0.008	0.00363	0	0.00514	0.00378	0.00374	0	0	0	0	0	0	0	0	0.00617	0	0	0.11219	0	0.01
d__Fungi|p__Ascomycota|c__Sordariomycetes|o__Sordariales|f__Lasiosphaeriaceae|g__Cercophora	0	0	0	0	0	0	0	0	0	0	0	0	0	0	0	0	0	0	0	0	0	0	0	0	0	0	0	0	0	0	0	0	0	0	0	0	0	0	0	0	0	0	0	0	0	0	0.00863	0	0.00714
d__Fungi|p__Ascomycota|c__Sordariomycetes|o__Sordariales|f__Lasiosphaeriaceae|g__Cercophora|s__Cercophora_coprophila	0	0	0	0	0	0	0	0	0	0	0	0	0	0	0	0	0	0	0	0	0	0	0	0	0	0	0	0	0	0	0	0	0	0	0	0	0	0	0	0	0	0	0	0	0	0	0	0	0.00714
d__Fungi|p__Ascomycota|c__Sordariomycetes|o__Sordariales|f__Lasiosphaeriaceae|g__Cercophora|s__Cercophora_unclassified	0	0	0	0	0	0	0	0	0	0	0	0	0	0	0	0	0	0	0	0	0	0	0	0	0	0	0	0	0	0	0	0	0	0	0	0	0	0	0	0	0	0	0	0	0	0	0.00863	0	0
d__Fungi|p__Ascomycota|c__Sordariomycetes|o__Sordariales|f__Lasiosphaeriaceae|g__Cladorrhinum	0	0	0	0	0	0	0	0	0	0	0	0	0	0	0	0	0	0	0	0	0	0	0	0	0	0	0	0	0	0	0	0	0	0	0	0	0	0	0	0	0	0	0	0	0	0	0.01479	0	0
d__Fungi|p__Ascomycota|c__Sordariomycetes|o__Sordariales|f__Lasiosphaeriaceae|g__Cladorrhinum|s__Cladorrhinum_bulbillosum	0	0	0	0	0	0	0	0	0	0	0	0	0	0	0	0	0	0	0	0	0	0	0	0	0	0	0	0	0	0	0	0	0	0	0	0	0	0	0	0	0	0	0	0	0	0	0	0	0
d__Fungi|p__Ascomycota|c__Sordariomycetes|o__Sordariales|f__Lasiosphaeriaceae|g__Cladorrhinum|s__Cladorrhinum_unclassified	0	0	0	0	0	0	0	0	0	0	0	0	0	0	0	0	0	0	0	0	0	0	0	0	0	0	0	0	0	0	0	0	0	0	0	0	0	0	0	0	0	0	0	0	0	0	0.01479	0	0
d__Fungi|p__Ascomycota|c__Sordariomycetes|o__Sordariales|f__Lasiosphaeriaceae|g__Lasiosphaeris	0	0	0	0	0	0	0	0	0	0	0	0	0	0	0	0	0	0	0	0	0	0	0	0	0	0	0	0	0	0	0	0	0	0	0	0	0	0	0	0	0	0	0	0	0	0	0	0	0
d__Fungi|p__Ascomycota|c__Sordariomycetes|o__Sordariales|f__Lasiosphaeriaceae|g__Lasiosphaeris|s__Lasiosphaeris_hispida	0	0	0	0	0	0	0	0	0	0	0	0	0	0	0	0	0	0	0	0	0	0	0	0	0	0	0	0	0	0	0	0	0	0	0	0	0	0	0	0	0	0	0	0	0	0	0	0	0
d__Fungi|p__Ascomycota|c__Sordariomycetes|o__Sordariales|f__Lasiosphaeriaceae|g__Podospora	0	0.15314	0	0.00487	0	0	0	0	0	0	0	0.00649	0	0	0	0	0	0	0	0.00609	0	0	0.00251	0	0	0.1334	0.00599	0.00908	0	0.008	0.00363	0	0.00514	0.00378	0.00374	0	0	0	0	0	0	0	0	0.00617	0	0	0.08137	0	0.00286
d__Fungi|p__Ascomycota|c__Sordariomycetes|o__Sordariales|f__Lasiosphaeriaceae|g__Podospora|s__Podospora_inflatula	0	0	0	0	0	0	0	0	0	0	0	0	0	0	0	0	0	0	0	0	0	0	0	0	0	0	0	0	0	0	0	0	0	0	0	0	0	0	0	0	0	0	0	0	0	0	0	0	0
d__Fungi|p__Ascomycota|c__Sordariomycetes|o__Sordariales|f__Lasiosphaeriaceae|g__Podospora|s__Podospora_intestinacea	0	0	0	0	0	0	0	0	0	0	0	0	0	0	0	0	0	0	0	0	0	0	0	0	0	0	0	0	0	0	0	0	0	0	0	0	0	0	0	0	0	0	0	0	0	0	0.03452	0	0
d__Fungi|p__Ascomycota|c__Sordariomycetes|o__Sordariales|f__Lasiosphaeriaceae|g__Podospora|s__Podospora_tetraspora	0	0.15314	0	0.00487	0	0	0	0	0	0	0	0.00649	0	0	0	0	0	0	0	0.00244	0	0	0.00251	0	0	0.1334	0.00599	0.00908	0	0.008	0.00363	0	0.00514	0.00378	0.00374	0	0	0	0	0	0	0	0	0.00617	0	0	0.03452	0	0
d__Fungi|p__Ascomycota|c__Sordariomycetes|o__Sordariales|f__Lasiosphaeriaceae|g__Podospora|s__Podospora_unclassified	0	0	0	0	0	0	0	0	0	0	0	0	0	0	0	0	0	0	0	0.00365	0	0	0	0	0	0	0	0	0	0	0	0	0	0	0	0	0	0	0	0	0	0	0	0	0	0	0.01233	0	0.00286
d__Fungi|p__Ascomycota|c__Sordariomycetes|o__Sordariales|f__Lasiosphaeriaceae|g__Zopfiella	0	0	0	0	0	0	0	0	0	0	0	0	0	0	0	0	0	0	0	0	0	0	0.00502	0	0	0	0	0	0	0	0	0	0	0	0	0	0	0	0	0	0	0	0	0	0	0	0.0074	0	0
d__Fungi|p__Ascomycota|c__Sordariomycetes|o__Sordariales|f__Lasiosphaeriaceae|g__Zopfiella|s__Podospora_setosa	0	0	0	0	0	0	0	0	0	0	0	0	0	0	0	0	0	0	0	0	0	0	0	0	0	0	0	0	0	0	0	0	0	0	0	0	0	0	0	0	0	0	0	0	0	0	0.0074	0	0
d__Fungi|p__Ascomycota|c__Sordariomycetes|o__Sordariales|f__Lasiosphaeriaceae|g__Zopfiella|s__Zopfiella_marina	0	0	0	0	0	0	0	0	0	0	0	0	0	0	0	0	0	0	0	0	0	0	0.00502	0	0	0	0	0	0	0	0	0	0	0	0	0	0	0	0	0	0	0	0	0	0	0	0	0	0
d__Fungi|p__Ascomycota|c__Sordariomycetes|o__Sordariales|f__Sordariaceae	0	0	0	0	0	0	0	0	0	0	0	0	0	0	0	0	0	0	0	0	0	0	0	0.00947	0	0.00257	0	0	0	0	0	0	0	0	0	0	0	0	0	0	0	0	0	0	0	0	0	0	0
d__Fungi|p__Ascomycota|c__Sordariomycetes|o__Sordariales|f__Sordariaceae|g__Neurospora	0	0	0	0	0	0	0	0	0	0	0	0	0	0	0	0	0	0	0	0	0	0	0	0.00947	0	0.00257	0	0	0	0	0	0	0	0	0	0	0	0	0	0	0	0	0	0	0	0	0	0	0
d__Fungi|p__Ascomycota|c__Sordariomycetes|o__Sordariales|f__Sordariaceae|g__Neurospora|s__Neurospora_terricola	0	0	0	0	0	0	0	0	0	0	0	0	0	0	0	0	0	0	0	0	0	0	0	0	0	0.00257	0	0	0	0	0	0	0	0	0	0	0	0	0	0	0	0	0	0	0	0	0	0	0
d__Fungi|p__Ascomycota|c__Sordariomycetes|o__Sordariales|f__Sordariaceae|g__Neurospora|s__Neurospora_unclassified	0	0	0	0	0	0	0	0	0	0	0	0	0	0	0	0	0	0	0	0	0	0	0	0.00947	0	0	0	0	0	0	0	0	0	0	0	0	0	0	0	0	0	0	0	0	0	0	0	0	0
d__Fungi|p__Ascomycota|c__Sordariomycetes|o__Sordariales|f__Sordariales_fam_Incertae_sedis	0	0	0	0	0	0	0	0	0	0	0	0	0	0	0	0	0	0	0	0	0	0	0	0	0.0037	0	0	0	0	0	0	0	0	0	0	0	0	0	0	0	0	0	0	0	0	0	0	0	0
d__Fungi|p__Ascomycota|c__Sordariomycetes|o__Sordariales|f__Sordariales_fam_Incertae_sedis|g__Conlarium	0	0	0	0	0	0	0	0	0	0	0	0	0	0	0	0	0	0	0	0	0	0	0	0	0.0037	0	0	0	0	0	0	0	0	0	0	0	0	0	0	0	0	0	0	0	0	0	0	0	0
d__Fungi|p__Ascomycota|c__Sordariomycetes|o__Sordariales|f__Sordariales_fam_Incertae_sedis|g__Conlarium|s__Conlarium_unclassified	0	0	0	0	0	0	0	0	0	0	0	0	0	0	0	0	0	0	0	0	0	0	0	0	0.0037	0	0	0	0	0	0	0	0	0	0	0	0	0	0	0	0	0	0	0	0	0	0	0	0
d__Fungi|p__Ascomycota|c__Sordariomycetes|o__Sordariales|f__Sordariales_fam_Incertae_sedis|g__Ramophialophora	0	0	0	0	0	0	0	0	0	0	0	0	0	0	0	0	0	0	0	0	0	0	0	0	0	0	0	0	0	0	0	0	0	0	0	0	0	0	0	0	0	0	0	0	0	0	0	0	0
d__Fungi|p__Ascomycota|c__Sordariomycetes|o__Sordariales|f__Sordariales_fam_Incertae_sedis|g__Ramophialophora|s__Ramophialophora_humicola	0	0	0	0	0	0	0	0	0	0	0	0	0	0	0	0	0	0	0	0	0	0	0	0	0	0	0	0	0	0	0	0	0	0	0	0	0	0	0	0	0	0	0	0	0	0	0	0	0
d__Fungi|p__Ascomycota|c__Sordariomycetes|o__Sordariales|f__Sordariales_unclassified	0	0	0	0	0	4.6277	0	0	0	0	0	0	0	0	0	0	0	0	0	0	0	0	0.00251	0	0	0.00257	0	0	0	0	0	0	0	0	0	0	0	0	0	0	0	0	0	0	0	0	0.00493	0	0
d__Fungi|p__Ascomycota|c__Sordariomycetes|o__Sordariales|f__Sordariales_unclassified|g__Sordariales_unclassified	0	0	0	0	0	4.6277	0	0	0	0	0	0	0	0	0	0	0	0	0	0	0	0	0.00251	0	0	0.00257	0	0	0	0	0	0	0	0	0	0	0	0	0	0	0	0	0	0	0	0	0.00493	0	0
d__Fungi|p__Ascomycota|c__Sordariomycetes|o__Sordariales|f__Sordariales_unclassified|g__Sordariales_unclassified|s__Sordariales_unclassified	0	0	0	0	0	4.6277	0	0	0	0	0	0	0	0	0	0	0	0	0	0	0	0	0.00251	0	0	0.00257	0	0	0	0	0	0	0	0	0	0	0	0	0	0	0	0	0	0	0	0	0.00493	0	0
d__Fungi|p__Ascomycota|c__Sordariomycetes|o__Sordariomycetes_Incertae_sedis	0	0	0	0	0	0	0	0	0	0	0	0	0	0	0	0	0	0	0	0	0	0	0	0	0	0	0	0	0	0	0	0	0	0	0	0	0	0	0	0	0	0	0	0	0	0	0	0	0
d__Fungi|p__Ascomycota|c__Sordariomycetes|o__Sordariomycetes_Incertae_sedis|f__Sordariomycetes_Incertae_sedis	0	0	0	0	0	0	0	0	0	0	0	0	0	0	0	0	0	0	0	0	0	0	0	0	0	0	0	0	0	0	0	0	0	0	0	0	0	0	0	0	0	0	0	0	0	0	0	0	0
d__Fungi|p__Ascomycota|c__Sordariomycetes|o__Sordariomycetes_Incertae_sedis|f__Sordariomycetes_Incertae_sedis|g__Myrmecridium	0	0	0	0	0	0	0	0	0	0	0	0	0	0	0	0	0	0	0	0	0	0	0	0	0	0	0	0	0	0	0	0	0	0	0	0	0	0	0	0	0	0	0	0	0	0	0	0	0
d__Fungi|p__Ascomycota|c__Sordariomycetes|o__Sordariomycetes_Incertae_sedis|f__Sordariomycetes_Incertae_sedis|g__Myrmecridium|s__Myrmecridium_schulzeri	0	0	0	0	0	0	0	0	0	0	0	0	0	0	0	0	0	0	0	0	0	0	0	0	0	0	0	0	0	0	0	0	0	0	0	0	0	0	0	0	0	0	0	0	0	0	0	0	0
d__Fungi|p__Ascomycota|c__Sordariomycetes|o__Sordariomycetes_unclassified	0	0	0	0	0	0	0	0	0	0	0	0	0	0	0	0	0	0	0	0	0	0	0.00251	0	0.02588	0.00641	0	0	0	0	0	0	0	0	0	0	0	0.01431	0	0	0	0	0	0	0	0	0.03822	0	0
d__Fungi|p__Ascomycota|c__Sordariomycetes|o__Sordariomycetes_unclassified|f__Sordariomycetes_unclassified	0	0	0	0	0	0	0	0	0	0	0	0	0	0	0	0	0	0	0	0	0	0	0.00251	0	0.02588	0.00641	0	0	0	0	0	0	0	0	0	0	0	0.01431	0	0	0	0	0	0	0	0	0.03822	0	0
d__Fungi|p__Ascomycota|c__Sordariomycetes|o__Sordariomycetes_unclassified|f__Sordariomycetes_unclassified|g__Sordariomycetes_unclassified	0	0	0	0	0	0	0	0	0	0	0	0	0	0	0	0	0	0	0	0	0	0	0.00251	0	0.02588	0.00641	0	0	0	0	0	0	0	0	0	0	0	0.01431	0	0	0	0	0	0	0	0	0.03822	0	0
d__Fungi|p__Ascomycota|c__Sordariomycetes|o__Sordariomycetes_unclassified|f__Sordariomycetes_unclassified|g__Sordariomycetes_unclassified|s__Sordariomycetes_unclassified	0	0	0	0	0	0	0	0	0	0	0	0	0	0	0	0	0	0	0	0	0	0	0.00251	0	0.02588	0.00641	0	0	0	0	0	0	0	0	0	0	0	0.01431	0	0	0	0	0	0	0	0	0.03822	0	0
d__Fungi|p__Ascomycota|c__Sordariomycetes|o__Sordariomycetidae_Incertae_sedis	0	0.27076	0	0	0	0.01215	0	0	0.47418	0	0	0	0	0	0	0	0	0	0.00377	0	0	0.00587	0.00628	0.01775	0.00493	0.26809	0	0	0	0	0	0	1.04946	0	0	0	0	0.01171	0.00692	0	0.02029	0	0	0	0	0	0.05424	0	1.14846
d__Fungi|p__Ascomycota|c__Sordariomycetes|o__Sordariomycetidae_Incertae_sedis|f__Apiosporaceae	0	0	0	0	0	0	0	0	0	0	0	0	0	0	0	0	0	0	0	0	0	0	0.00251	0	0	0	0	0	0	0	0	0	0.00257	0	0	0	0	0	0.00692	0	0.01522	0	0	0	0	0	0	0	1.13703
d__Fungi|p__Ascomycota|c__Sordariomycetes|o__Sordariomycetidae_Incertae_sedis|f__Apiosporaceae|g__Arthrinium	0	0	0	0	0	0	0	0	0	0	0	0	0	0	0	0	0	0	0	0	0	0	0.00251	0	0	0	0	0	0	0	0	0	0.00257	0	0	0	0	0	0.00692	0	0.01522	0	0	0	0	0	0	0	1.13703
d__Fungi|p__Ascomycota|c__Sordariomycetes|o__Sordariomycetidae_Incertae_sedis|f__Apiosporaceae|g__Arthrinium|s__Arthrinium_aureum	0	0	0	0	0	0	0	0	0	0	0	0	0	0	0	0	0	0	0	0	0	0	0	0	0	0	0	0	0	0	0	0	0	0	0	0	0	0	0.00692	0	0	0	0	0	0	0	0	0	0
d__Fungi|p__Ascomycota|c__Sordariomycetes|o__Sordariomycetidae_Incertae_sedis|f__Apiosporaceae|g__Arthrinium|s__Arthrinium_phaeospermum	0	0	0	0	0	0	0	0	0	0	0	0	0	0	0	0	0	0	0	0	0	0	0.00251	0	0	0	0	0	0	0	0	0	0.00257	0	0	0	0	0	0	0	0.01522	0	0	0	0	0	0	0	1.13703
d__Fungi|p__Ascomycota|c__Sordariomycetes|o__Sordariomycetidae_Incertae_sedis|f__Glomerellaceae	0	0.20215	0	0	0	0	0	0	0	0	0	0	0	0	0	0	0	0	0	0	0	0	0	0	0.00493	0.19882	0	0	0	0	0	0	1.04689	0	0	0	0	0.01171	0	0	0.00507	0	0	0	0	0	0.02342	0	0.01143
d__Fungi|p__Ascomycota|c__Sordariomycetes|o__Sordariomycetidae_Incertae_sedis|f__Glomerellaceae|g__Glomerella	0	0.20215	0	0	0	0	0	0	0	0	0	0	0	0	0	0	0	0	0	0	0	0	0	0	0.00493	0.19882	0	0	0	0	0	0	1.04689	0	0	0	0	0.01171	0	0	0.00507	0	0	0	0	0	0.02342	0	0.01143
d__Fungi|p__Ascomycota|c__Sordariomycetes|o__Sordariomycetidae_Incertae_sedis|f__Glomerellaceae|g__Glomerella|s__Colletotrichum_capsici	0	0	0	0	0	0	0	0	0	0	0	0	0	0	0	0	0	0	0	0	0	0	0	0	0	0	0	0	0	0	0	0	0	0	0	0	0	0	0	0	0	0	0	0	0	0	0	0	0
d__Fungi|p__Ascomycota|c__Sordariomycetes|o__Sordariomycetidae_Incertae_sedis|f__Glomerellaceae|g__Glomerella|s__Colletotrichum_cliviae	0	0.20215	0	0	0	0	0	0	0	0	0	0	0	0	0	0	0	0	0	0	0	0	0	0	0.00493	0.19882	0	0	0	0	0	0	0	0	0	0	0	0	0	0	0	0	0	0	0	0	0	0	0
d__Fungi|p__Ascomycota|c__Sordariomycetes|o__Sordariomycetidae_Incertae_sedis|f__Glomerellaceae|g__Glomerella|s__Colletotrichum_coccodes	0	0	0	0	0	0	0	0	0	0	0	0	0	0	0	0	0	0	0	0	0	0	0	0	0	0	0	0	0	0	0	0	0	0	0	0	0	0	0	0	0	0	0	0	0	0	0.02342	0	0
d__Fungi|p__Ascomycota|c__Sordariomycetes|o__Sordariomycetidae_Incertae_sedis|f__Glomerellaceae|g__Glomerella|s__Glomerella_unclassified	0	0	0	0	0	0	0	0	0	0	0	0	0	0	0	0	0	0	0	0	0	0	0	0	0	0	0	0	0	0	0	0	1.04689	0	0	0	0	0.01171	0	0	0.00507	0	0	0	0	0	0	0	0.01143
d__Fungi|p__Ascomycota|c__Sordariomycetes|o__Sordariomycetidae_Incertae_sedis|f__Plectosphaerellaceae	0	0.06861	0	0	0	0.01215	0	0	0.47418	0	0	0	0	0	0	0	0	0	0.00377	0	0	0.00587	0.00377	0.01775	0	0.06927	0	0	0	0	0	0	0	0	0	0	0	0	0	0	0	0	0	0	0	0	0.03082	0	0
d__Fungi|p__Ascomycota|c__Sordariomycetes|o__Sordariomycetidae_Incertae_sedis|f__Plectosphaerellaceae|g__Gibellulopsis	0	0	0	0	0	0	0	0	0	0	0	0	0	0	0	0	0	0	0.00377	0	0	0.00587	0	0	0	0	0	0	0	0	0	0	0	0	0	0	0	0	0	0	0	0	0	0	0	0	0.01479	0	0
d__Fungi|p__Ascomycota|c__Sordariomycetes|o__Sordariomycetidae_Incertae_sedis|f__Plectosphaerellaceae|g__Gibellulopsis|s__Gibellulopsis_nigrescens	0	0	0	0	0	0	0	0	0	0	0	0	0	0	0	0	0	0	0.00377	0	0	0.00587	0	0	0	0	0	0	0	0	0	0	0	0	0	0	0	0	0	0	0	0	0	0	0	0	0.01479	0	0
d__Fungi|p__Ascomycota|c__Sordariomycetes|o__Sordariomycetidae_Incertae_sedis|f__Plectosphaerellaceae|g__Plectosphaerella	0	0.06861	0	0	0	0.01215	0	0	0.47418	0	0	0	0	0	0	0	0	0	0	0	0	0	0.00377	0	0	0.06927	0	0	0	0	0	0	0	0	0	0	0	0	0	0	0	0	0	0	0	0	0.01603	0	0
d__Fungi|p__Ascomycota|c__Sordariomycetes|o__Sordariomycetidae_Incertae_sedis|f__Plectosphaerellaceae|g__Plectosphaerella|s__Plectosphaerella_cucumerina	0	0.06861	0	0	0	0.01215	0	0	0.47418	0	0	0	0	0	0	0	0	0	0	0	0	0	0.00377	0	0	0.06927	0	0	0	0	0	0	0	0	0	0	0	0	0	0	0	0	0	0	0	0	0.0111	0	0
d__Fungi|p__Ascomycota|c__Sordariomycetes|o__Sordariomycetidae_Incertae_sedis|f__Plectosphaerellaceae|g__Plectosphaerella|s__Plectosphaerella_plurivora	0	0	0	0	0	0	0	0	0	0	0	0	0	0	0	0	0	0	0	0	0	0	0	0	0	0	0	0	0	0	0	0	0	0	0	0	0	0	0	0	0	0	0	0	0	0	0.00493	0	0
d__Fungi|p__Ascomycota|c__Sordariomycetes|o__Sordariomycetidae_Incertae_sedis|f__Plectosphaerellaceae|g__Plectosporium	0	0	0	0	0	0	0	0	0	0	0	0	0	0	0	0	0	0	0	0	0	0	0	0	0	0	0	0	0	0	0	0	0	0	0	0	0	0	0	0	0	0	0	0	0	0	0	0	0
d__Fungi|p__Ascomycota|c__Sordariomycetes|o__Sordariomycetidae_Incertae_sedis|f__Plectosphaerellaceae|g__Plectosporium|s__Plectosporium_unclassified	0	0	0	0	0	0	0	0	0	0	0	0	0	0	0	0	0	0	0	0	0	0	0	0	0	0	0	0	0	0	0	0	0	0	0	0	0	0	0	0	0	0	0	0	0	0	0	0	0
d__Fungi|p__Ascomycota|c__Sordariomycetes|o__Sordariomycetidae_Incertae_sedis|f__Plectosphaerellaceae|g__Verticillium	0	0	0	0	0	0	0	0	0	0	0	0	0	0	0	0	0	0	0	0	0	0	0	0.01775	0	0	0	0	0	0	0	0	0	0	0	0	0	0	0	0	0	0	0	0	0	0	0	0	0
d__Fungi|p__Ascomycota|c__Sordariomycetes|o__Sordariomycetidae_Incertae_sedis|f__Plectosphaerellaceae|g__Verticillium|s__Verticillium_leptobactrum	0	0	0	0	0	0	0	0	0	0	0	0	0	0	0	0	0	0	0	0	0	0	0	0.01775	0	0	0	0	0	0	0	0	0	0	0	0	0	0	0	0	0	0	0	0	0	0	0	0	0
d__Fungi|p__Ascomycota|c__Sordariomycetes|o__Trichosphaeriales	0	0	0	0	0	0	0.03065	0	0	0	0	0	0	0	0	0	0	0	0	0	0	0.00881	0.00502	0	0.00493	0.00513	0	0	0	0.008	0	0	0	0	0	0	0	0	0	0	0	0	0.00371	38.4118	0	0	0.00247	0	0
d__Fungi|p__Ascomycota|c__Sordariomycetes|o__Trichosphaeriales|f__Trichosphaeriales_Incertae_sedis	0	0	0	0	0	0	0.03065	0	0	0	0	0	0	0	0	0	0	0	0	0	0	0.00881	0.00502	0	0.00493	0.00513	0	0	0	0.008	0	0	0	0	0	0	0	0	0	0	0	0	0.00371	38.4118	0	0	0.00247	0	0
d__Fungi|p__Ascomycota|c__Sordariomycetes|o__Trichosphaeriales|f__Trichosphaeriales_Incertae_sedis|g__Khuskia	0	0	0	0	0	0	0	0	0	0	0	0	0	0	0	0	0	0	0	0	0	0	0	0	0.00493	0	0	0	0	0	0	0	0	0	0	0	0	0	0	0	0	0	0	0	0	0	0	0	0
d__Fungi|p__Ascomycota|c__Sordariomycetes|o__Trichosphaeriales|f__Trichosphaeriales_Incertae_sedis|g__Khuskia|s__Nigrospora_oryzae	0	0	0	0	0	0	0	0	0	0	0	0	0	0	0	0	0	0	0	0	0	0	0	0	0.00493	0	0	0	0	0	0	0	0	0	0	0	0	0	0	0	0	0	0	0	0	0	0	0	0
d__Fungi|p__Ascomycota|c__Sordariomycetes|o__Trichosphaeriales|f__Trichosphaeriales_Incertae_sedis|g__Trichosphaeriales_Incertae_sedis_unclassified	0	0	0	0	0	0	0.03065	0	0	0	0	0	0	0	0	0	0	0	0	0	0	0.00881	0.00502	0	0	0.00513	0	0	0	0.008	0	0	0	0	0	0	0	0	0	0	0	0	0.00371	38.4118	0	0	0.00247	0	0
d__Fungi|p__Ascomycota|c__Sordariomycetes|o__Trichosphaeriales|f__Trichosphaeriales_Incertae_sedis|g__Trichosphaeriales_Incertae_sedis_unclassified|s__Trichosphaeriales_Incertae_sedis_unclassified	0	0	0	0	0	0	0.03065	0	0	0	0	0	0	0	0	0	0	0	0	0	0	0.00881	0.00502	0	0	0.00513	0	0	0	0.008	0	0	0	0	0	0	0	0	0	0	0	0	0.00371	38.4118	0	0	0.00247	0	0
d__Fungi|p__Ascomycota|c__Sordariomycetes|o__Xylariales	0	0	0	0	0	0	0.00383	0.00252	0	0	0	0	0	0	0.07445	0	0	0	0	0	0	0.07047	0	0	0	0	0.00718	0.00519	0	33.2511	0.00727	0.00957	0	0	0	0	0	0	0	0	0	0	0	0.00247	0	0	0	0	0.00571
d__Fungi|p__Ascomycota|c__Sordariomycetes|o__Xylariales|f__Amphisphaeriaceae	0	0	0	0	0	0	0.00383	0.00252	0	0	0	0	0	0	0	0	0	0	0	0	0	0.07047	0	0	0	0	0.00718	0.00519	0	33.2511	0.00727	0.00957	0	0	0	0	0	0	0	0	0	0	0	0.00247	0	0	0	0	0.00571
d__Fungi|p__Ascomycota|c__Sordariomycetes|o__Xylariales|f__Amphisphaeriaceae|g__Pestalotiopsis	0	0	0	0	0	0	0	0	0	0	0	0	0	0	0	0	0	0	0	0	0	0.07047	0	0	0	0	0	0	0	33.2405	0	0.00957	0	0	0	0	0	0	0	0	0	0	0	0.00247	0	0	0	0	0
d__Fungi|p__Ascomycota|c__Sordariomycetes|o__Xylariales|f__Amphisphaeriaceae|g__Pestalotiopsis|s__Pestalotiopsis_adusta	0	0	0	0	0	0	0	0	0	0	0	0	0	0	0	0	0	0	0	0	0	0	0	0	0	0	0	0	0	0	0	0.00957	0	0	0	0	0	0	0	0	0	0	0	0	0	0	0	0	0
d__Fungi|p__Ascomycota|c__Sordariomycetes|o__Xylariales|f__Amphisphaeriaceae|g__Pestalotiopsis|s__Pestalotiopsis_unclassified	0	0	0	0	0	0	0	0	0	0	0	0	0	0	0	0	0	0	0	0	0	0.07047	0	0	0	0	0	0	0	33.2405	0	0	0	0	0	0	0	0	0	0	0	0	0	0.00247	0	0	0	0	0
d__Fungi|p__Ascomycota|c__Sordariomycetes|o__Xylariales|f__Amphisphaeriaceae|g__Truncatella	0	0	0	0	0	0	0.00383	0.00252	0	0	0	0	0	0	0	0	0	0	0	0	0	0	0	0	0	0	0.00718	0.00519	0	0.01066	0.00727	0	0	0	0	0	0	0	0	0	0	0	0	0	0	0	0	0	0.00571
d__Fungi|p__Ascomycota|c__Sordariomycetes|o__Xylariales|f__Amphisphaeriaceae|g__Truncatella|s__Truncatella_angustata	0	0	0	0	0	0	0.00383	0.00252	0	0	0	0	0	0	0	0	0	0	0	0	0	0	0	0	0	0	0.00718	0.00519	0	0.01066	0.00727	0	0	0	0	0	0	0	0	0	0	0	0	0	0	0	0	0	0.00571
d__Fungi|p__Ascomycota|c__Sordariomycetes|o__Xylariales|f__Xylariaceae	0	0	0	0	0	0	0	0	0	0	0	0	0	0	0.07445	0	0	0	0	0	0	0	0	0	0	0	0	0	0	0	0	0	0	0	0	0	0	0	0	0	0	0	0	0	0	0	0	0	0
d__Fungi|p__Ascomycota|c__Sordariomycetes|o__Xylariales|f__Xylariaceae|g__Hypoxylon	0	0	0	0	0	0	0	0	0	0	0	0	0	0	0.07445	0	0	0	0	0	0	0	0	0	0	0	0	0	0	0	0	0	0	0	0	0	0	0	0	0	0	0	0	0	0	0	0	0	0
d__Fungi|p__Ascomycota|c__Sordariomycetes|o__Xylariales|f__Xylariaceae|g__Hypoxylon|s__Hypoxylon_ticinense	0	0	0	0	0	0	0	0	0	0	0	0	0	0	0.07445	0	0	0	0	0	0	0	0	0	0	0	0	0	0	0	0	0	0	0	0	0	0	0	0	0	0	0	0	0	0	0	0	0	0
d__Fungi|p__Ascomycota|c__Sordariomycetes|o__Xylariales|f__Xylariales_Incertae_sedis	0	0	0	0	0	0	0	0	0	0	0	0	0	0	0	0	0	0	0	0	0	0	0	0	0	0	0	0	0	0	0	0	0	0	0	0	0	0	0	0	0	0	0	0	0	0	0	0	0
d__Fungi|p__Ascomycota|c__Sordariomycetes|o__Xylariales|f__Xylariales_Incertae_sedis|g__Monosporascus	0	0	0	0	0	0	0	0	0	0	0	0	0	0	0	0	0	0	0	0	0	0	0	0	0	0	0	0	0	0	0	0	0	0	0	0	0	0	0	0	0	0	0	0	0	0	0	0	0
d__Fungi|p__Ascomycota|c__Sordariomycetes|o__Xylariales|f__Xylariales_Incertae_sedis|g__Monosporascus|s__Monosporascus_cannonballus	0	0	0	0	0	0	0	0	0	0	0	0	0	0	0	0	0	0	0	0	0	0	0	0	0	0	0	0	0	0	0	0	0	0	0	0	0	0	0	0	0	0	0	0	0	0	0	0	0
d__Fungi|p__Ascomycota|c__Taphrinomycetes	0	0	0	0	0	0	0	0	0	0	0	0	0	0	0	0	0	0	0	0	0	0	0.00251	0	0.00863	0	0	0	0	0	0	0	0	0	0	0	0	0	0	0	0	0	0	0	0	0	0	0	0
d__Fungi|p__Ascomycota|c__Taphrinomycetes|o__Taphrinales	0	0	0	0	0	0	0	0	0	0	0	0	0	0	0	0	0	0	0	0	0	0	0.00251	0	0.00863	0	0	0	0	0	0	0	0	0	0	0	0	0	0	0	0	0	0	0	0	0	0	0	0
d__Fungi|p__Ascomycota|c__Taphrinomycetes|o__Taphrinales|f__Taphrinaceae	0	0	0	0	0	0	0	0	0	0	0	0	0	0	0	0	0	0	0	0	0	0	0.00251	0	0.00863	0	0	0	0	0	0	0	0	0	0	0	0	0	0	0	0	0	0	0	0	0	0	0	0
d__Fungi|p__Ascomycota|c__Taphrinomycetes|o__Taphrinales|f__Taphrinaceae|g__Taphrina	0	0	0	0	0	0	0	0	0	0	0	0	0	0	0	0	0	0	0	0	0	0	0.00251	0	0.00863	0	0	0	0	0	0	0	0	0	0	0	0	0	0	0	0	0	0	0	0	0	0	0	0
d__Fungi|p__Ascomycota|c__Taphrinomycetes|o__Taphrinales|f__Taphrinaceae|g__Taphrina|s__Taphrina_mume	0	0	0	0	0	0	0	0	0	0	0	0	0	0	0	0	0	0	0	0	0	0	0	0	0.00863	0	0	0	0	0	0	0	0	0	0	0	0	0	0	0	0	0	0	0	0	0	0	0	0
d__Fungi|p__Ascomycota|c__Taphrinomycetes|o__Taphrinales|f__Taphrinaceae|g__Taphrina|s__Taphrina_pruni	0	0	0	0	0	0	0	0	0	0	0	0	0	0	0	0	0	0	0	0	0	0	0.00251	0	0	0	0	0	0	0	0	0	0	0	0	0	0	0	0	0	0	0	0	0	0	0	0	0	0
d__Fungi|p__Ascomycota|c__Xylonomycetes	0	0	0	0	0	0	0.01149	0	0	0	0	0	0	0	0	0	0	0	0	0	0	0	0	0	0	0	0	0	0	0	0	0	0	0	0	0	0	0	0	0	0	0	0	0	0	0	0	0	0
d__Fungi|p__Ascomycota|c__Xylonomycetes|o__Symbiotaphrinales	0	0	0	0	0	0	0.01149	0	0	0	0	0	0	0	0	0	0	0	0	0	0	0	0	0	0	0	0	0	0	0	0	0	0	0	0	0	0	0	0	0	0	0	0	0	0	0	0	0	0
d__Fungi|p__Ascomycota|c__Xylonomycetes|o__Symbiotaphrinales|f__Symbiotaphrinaceae	0	0	0	0	0	0	0.01149	0	0	0	0	0	0	0	0	0	0	0	0	0	0	0	0	0	0	0	0	0	0	0	0	0	0	0	0	0	0	0	0	0	0	0	0	0	0	0	0	0	0
d__Fungi|p__Ascomycota|c__Xylonomycetes|o__Symbiotaphrinales|f__Symbiotaphrinaceae|g__Symbiotaphrina	0	0	0	0	0	0	0.01149	0	0	0	0	0	0	0	0	0	0	0	0	0	0	0	0	0	0	0	0	0	0	0	0	0	0	0	0	0	0	0	0	0	0	0	0	0	0	0	0	0	0
d__Fungi|p__Ascomycota|c__Xylonomycetes|o__Symbiotaphrinales|f__Symbiotaphrinaceae|g__Symbiotaphrina|s__Symbiotaphrina_buchneri	0	0	0	0	0	0	0.01149	0	0	0	0	0	0	0	0	0	0	0	0	0	0	0	0	0	0	0	0	0	0	0	0	0	0	0	0	0	0	0	0	0	0	0	0	0	0	0	0	0	0
d__Fungi|p__Basidiomycota	11.1359	4.18148	1.19092	19.4787	37.6963	12.5568	3.71884	5.14192	0.00973	10.6357	0.7381	7.68192	80.8794	0.01068	4.09584	8.79693	2.74138	36.1062	36.1878	55.8536	1.84662	57.2551	1.57764	22.4808	18.5839	2.9939	39.5246	1.6164	9.5061	4.08158	96.8818	6.32743	8.55749	54.0771	3.90971	0.35425	34.3433	3.47899	85.7271	1.87719	10.4111	0.65315	5.6063	17.449	9.17948	84.5168	3.32385	0	1.26559
d__Fungi|p__Basidiomycota|c__Agaricomycetes	0.18123	0.07719	0	0.01339	1.01166	8.45779	0.00766	0	0	0	0.57301	0.15444	36.0429	0.00801	0.10299	5.2057	0	12.478	0.50979	38.1844	0.02015	18.6485	0.04897	20.402	0.15159	0.09879	23.4343	0.01687	0.11088	0.00933	0	0.14709	0.01028	24.2898	0.15599	0	1.34894	0	0	0.65304	0	0.09189	0.79472	12.1969	0.13955	0	0.09123	0	0.00714
d__Fungi|p__Basidiomycota|c__Agaricomycetes|o__Agaricales	0	0	0	0	0.02174	8.45779	0	0	0	0	0.02512	0.02855	36.0429	0.00801	0	0	0	12.4739	0.49347	0	0	2.24904	0.03893	20.402	0.03821	0.0154	23.4343	0.01038	0.10032	0.00533	0	0.14231	0.00257	1.54135	0.00874	0	1.34894	0	0	0.65304	0	0	0.59079	0.00494	0.11837	0	0.00247	0	0
d__Fungi|p__Basidiomycota|c__Agaricomycetes|o__Agaricales|f__Agaricaceae	0	0	0	0	0	0	0	0	0	0	0	0	0	0	0	0	0	0	0	0	0	0	0	0	0	0	0	0	0	0	0	0	0	0	0	0	0	0	0	0	0	0	0	0	0	0	0	0	0
d__Fungi|p__Basidiomycota|c__Agaricomycetes|o__Agaricales|f__Agaricaceae|g__Agaricus	0	0	0	0	0	0	0	0	0	0	0	0	0	0	0	0	0	0	0	0	0	0	0	0	0	0	0	0	0	0	0	0	0	0	0	0	0	0	0	0	0	0	0	0	0	0	0	0	0
d__Fungi|p__Basidiomycota|c__Agaricomycetes|o__Agaricales|f__Agaricaceae|g__Agaricus|s__Agaricus_campestris	0	0	0	0	0	0	0	0	0	0	0	0	0	0	0	0	0	0	0	0	0	0	0	0	0	0	0	0	0	0	0	0	0	0	0	0	0	0	0	0	0	0	0	0	0	0	0	0	0
d__Fungi|p__Basidiomycota|c__Agaricomycetes|o__Agaricales|f__Agaricales_unclassified	0	0	0	0	0	0	0	0	0	0	0	0	0	0	0	0	0	0	0	0	0	1.52823	0	0	0	0	0	0	0	0	0	0	0	0	0	0	0	0	0	0	0	0	0	0	0	0	0	0	0
d__Fungi|p__Basidiomycota|c__Agaricomycetes|o__Agaricales|f__Agaricales_unclassified|g__Agaricales_unclassified	0	0	0	0	0	0	0	0	0	0	0	0	0	0	0	0	0	0	0	0	0	1.52823	0	0	0	0	0	0	0	0	0	0	0	0	0	0	0	0	0	0	0	0	0	0	0	0	0	0	0
d__Fungi|p__Basidiomycota|c__Agaricomycetes|o__Agaricales|f__Agaricales_unclassified|g__Agaricales_unclassified|s__Agaricales_unclassified	0	0	0	0	0	0	0	0	0	0	0	0	0	0	0	0	0	0	0	0	0	1.52823	0	0	0	0	0	0	0	0	0	0	0	0	0	0	0	0	0	0	0	0	0	0	0	0	0	0	0
d__Fungi|p__Basidiomycota|c__Agaricomycetes|o__Agaricales|f__Amanitaceae	0	0	0	0	0	0	0	0	0	0	0	0	0	0	0	0	0	0	0	0	0	0	0	0	0.00493	0.00385	0	0	0	0	0	0	0	0	0	0	0	0	0	0	0	0	0	0	0	0	0	0	0
d__Fungi|p__Basidiomycota|c__Agaricomycetes|o__Agaricales|f__Amanitaceae|g__Amanita	0	0	0	0	0	0	0	0	0	0	0	0	0	0	0	0	0	0	0	0	0	0	0	0	0.00493	0.00385	0	0	0	0	0	0	0	0	0	0	0	0	0	0	0	0	0	0	0	0	0	0	0
d__Fungi|p__Basidiomycota|c__Agaricomycetes|o__Agaricales|f__Amanitaceae|g__Amanita|s__Amanita_spissacea	0	0	0	0	0	0	0	0	0	0	0	0	0	0	0	0	0	0	0	0	0	0	0	0	0.00493	0.00385	0	0	0	0	0	0	0	0	0	0	0	0	0	0	0	0	0	0	0	0	0	0	0
d__Fungi|p__Basidiomycota|c__Agaricomycetes|o__Agaricales|f__Clavariaceae	0	0	0	0	0	0	0	0	0	0	0	0	0	0	0	0	0	0	0	0	0	0	0	0	0	0	0	0	0	0	0	0	0	0	0	0	0	0	0	0	0	0	0	0	0	0	0	0	0
d__Fungi|p__Basidiomycota|c__Agaricomycetes|o__Agaricales|f__Clavariaceae|g__Clavaria	0	0	0	0	0	0	0	0	0	0	0	0	0	0	0	0	0	0	0	0	0	0	0	0	0	0	0	0	0	0	0	0	0	0	0	0	0	0	0	0	0	0	0	0	0	0	0	0	0
d__Fungi|p__Basidiomycota|c__Agaricomycetes|o__Agaricales|f__Clavariaceae|g__Clavaria|s__Clavaria_flavostellifera	0	0	0	0	0	0	0	0	0	0	0	0	0	0	0	0	0	0	0	0	0	0	0	0	0	0	0	0	0	0	0	0	0	0	0	0	0	0	0	0	0	0	0	0	0	0	0	0	0
d__Fungi|p__Basidiomycota|c__Agaricomycetes|o__Agaricales|f__Cortinariaceae	0	0	0	0	0	0	0	0	0	0	0	0	0	0	0	0	0	0	0	0	0	0	0	0	0	0.00257	0	0	0	0	0	0	0	0	0	0	0	0	0	0	0	0	0	0	0	0	0	0	0
d__Fungi|p__Basidiomycota|c__Agaricomycetes|o__Agaricales|f__Cortinariaceae|g__Cortinarius	0	0	0	0	0	0	0	0	0	0	0	0	0	0	0	0	0	0	0	0	0	0	0	0	0	0.00257	0	0	0	0	0	0	0	0	0	0	0	0	0	0	0	0	0	0	0	0	0	0	0
d__Fungi|p__Basidiomycota|c__Agaricomycetes|o__Agaricales|f__Cortinariaceae|g__Cortinarius|s__Cortinarius_centrirufus	0	0	0	0	0	0	0	0	0	0	0	0	0	0	0	0	0	0	0	0	0	0	0	0	0	0.00257	0	0	0	0	0	0	0	0	0	0	0	0	0	0	0	0	0	0	0	0	0	0	0
d__Fungi|p__Basidiomycota|c__Agaricomycetes|o__Agaricales|f__Crepidotaceae	0	0	0	0	0	0	0	0	0	0	0	0	0	0	0	0	0	0	0	0	0	0	0	0	0.0037	0	0	0	0	0	0	0	0	0	0	0	0	0	0	0	0	0	0	0	0	0	0	0	0
d__Fungi|p__Basidiomycota|c__Agaricomycetes|o__Agaricales|f__Crepidotaceae|g__Crepidotus	0	0	0	0	0	0	0	0	0	0	0	0	0	0	0	0	0	0	0	0	0	0	0	0	0.0037	0	0	0	0	0	0	0	0	0	0	0	0	0	0	0	0	0	0	0	0	0	0	0	0
d__Fungi|p__Basidiomycota|c__Agaricomycetes|o__Agaricales|f__Crepidotaceae|g__Crepidotus|s__Crepidotus_applanatus	0	0	0	0	0	0	0	0	0	0	0	0	0	0	0	0	0	0	0	0	0	0	0	0	0.0037	0	0	0	0	0	0	0	0	0	0	0	0	0	0	0	0	0	0	0	0	0	0	0	0
d__Fungi|p__Basidiomycota|c__Agaricomycetes|o__Agaricales|f__Entolomataceae	0	0	0	0	0	0	0	0	0	0	0.01914	0	0	0	0	0	0	0	0.49347	0	0	0	0	0	0.00493	0	23.4343	0.01038	0	0	0	0	0	0	0	0	0	0	0	0	0	0	0	0	0	0	0	0	0
d__Fungi|p__Basidiomycota|c__Agaricomycetes|o__Agaricales|f__Entolomataceae|g__Clitopilus	0	0	0	0	0	0	0	0	0	0	0	0	0	0	0	0	0	0	0	0	0	0	0	0	0.00493	0	0	0	0	0	0	0	0	0	0	0	0	0	0	0	0	0	0	0	0	0	0	0	0
d__Fungi|p__Basidiomycota|c__Agaricomycetes|o__Agaricales|f__Entolomataceae|g__Clitopilus|s__Clitopilus_hobsonii	0	0	0	0	0	0	0	0	0	0	0	0	0	0	0	0	0	0	0	0	0	0	0	0	0.00493	0	0	0	0	0	0	0	0	0	0	0	0	0	0	0	0	0	0	0	0	0	0	0	0
d__Fungi|p__Basidiomycota|c__Agaricomycetes|o__Agaricales|f__Entolomataceae|g__Entoloma	0	0	0	0	0	0	0	0	0	0	0.01914	0	0	0	0	0	0	0	0.49347	0	0	0	0	0	0	0	23.4343	0.01038	0	0	0	0	0	0	0	0	0	0	0	0	0	0	0	0	0	0	0	0	0
d__Fungi|p__Basidiomycota|c__Agaricomycetes|o__Agaricales|f__Entolomataceae|g__Entoloma|s__Entoloma_brunneosericeum	0	0	0	0	0	0	0	0	0	0	0	0	0	0	0	0	0	0	0	0	0	0	0	0	0	0	0	0	0	0	0	0	0	0	0	0	0	0	0	0	0	0	0	0	0	0	0	0	0
d__Fungi|p__Basidiomycota|c__Agaricomycetes|o__Agaricales|f__Entolomataceae|g__Entoloma|s__Entoloma_flocculosum	0	0	0	0	0	0	0	0	0	0	0.01914	0	0	0	0	0	0	0	0.49347	0	0	0	0	0	0	0	23.4343	0.01038	0	0	0	0	0	0	0	0	0	0	0	0	0	0	0	0	0	0	0	0	0
d__Fungi|p__Basidiomycota|c__Agaricomycetes|o__Agaricales|f__Hebelomataceae	0	0	0	0	0	0	0	0	0	0	0	0	0	0	0	0	0	0	0	0	0	0	0	0	0.00493	0	0	0	0	0	0	0	0	0	0	0	0	0	0	0	0	0	0	0	0	0	0.00247	0	0
d__Fungi|p__Basidiomycota|c__Agaricomycetes|o__Agaricales|f__Hebelomataceae|g__Hebeloma	0	0	0	0	0	0	0	0	0	0	0	0	0	0	0	0	0	0	0	0	0	0	0	0	0.00493	0	0	0	0	0	0	0	0	0	0	0	0	0	0	0	0	0	0	0	0	0	0.00247	0	0
d__Fungi|p__Basidiomycota|c__Agaricomycetes|o__Agaricales|f__Hebelomataceae|g__Hebeloma|s__Hebeloma_leucosarx	0	0	0	0	0	0	0	0	0	0	0	0	0	0	0	0	0	0	0	0	0	0	0	0	0.00493	0	0	0	0	0	0	0	0	0	0	0	0	0	0	0	0	0	0	0	0	0	0	0	0
d__Fungi|p__Basidiomycota|c__Agaricomycetes|o__Agaricales|f__Hebelomataceae|g__Hebeloma|s__Hebeloma_unclassified	0	0	0	0	0	0	0	0	0	0	0	0	0	0	0	0	0	0	0	0	0	0	0	0	0	0	0	0	0	0	0	0	0	0	0	0	0	0	0	0	0	0	0	0	0	0	0.00247	0	0
d__Fungi|p__Basidiomycota|c__Agaricomycetes|o__Agaricales|f__Lycoperdaceae	0	0	0	0	0	0	0	0	0	0	0	0	0	0.00801	0	0	0	0	0	0	0	0.01321	0	0	0	0	0	0	0	0.00533	0	0	0	0	0	0	0	0	0	0	0	0	0	0.00494	0	0	0	0	0
d__Fungi|p__Basidiomycota|c__Agaricomycetes|o__Agaricales|f__Lycoperdaceae|g__Lycoperdon	0	0	0	0	0	0	0	0	0	0	0	0	0	0.00801	0	0	0	0	0	0	0	0.01321	0	0	0	0	0	0	0	0.00533	0	0	0	0	0	0	0	0	0	0	0	0	0	0.00494	0	0	0	0	0
d__Fungi|p__Basidiomycota|c__Agaricomycetes|o__Agaricales|f__Lycoperdaceae|g__Lycoperdon|s__Lycoperdon_rupicola	0	0	0	0	0	0	0	0	0	0	0	0	0	0.00801	0	0	0	0	0	0	0	0.01321	0	0	0	0	0	0	0	0.00533	0	0	0	0	0	0	0	0	0	0	0	0	0	0.00494	0	0	0	0	0
d__Fungi|p__Basidiomycota|c__Agaricomycetes|o__Agaricales|f__Lycoperdaceae|g__Lycoperdon|s__Lycoperdon_unclassified	0	0	0	0	0	0	0	0	0	0	0	0	0	0	0	0	0	0	0	0	0	0	0	0	0	0	0	0	0	0	0	0	0	0	0	0	0	0	0	0	0	0	0	0	0	0	0	0	0
d__Fungi|p__Basidiomycota|c__Agaricomycetes|o__Agaricales|f__Marasmiaceae	0	0	0	0	0	0	0	0	0	0	0	0	0	0	0	0	0	0	0	0	0	0	0.0113	0	0.00986	0.00641	0	0	0	0	0	0	0	0.03151	0	0	0	0	0	0	0	0	0	0	0	0	0	0	0
d__Fungi|p__Basidiomycota|c__Agaricomycetes|o__Agaricales|f__Marasmiaceae|g__Flammulina	0	0	0	0	0	0	0	0	0	0	0	0	0	0	0	0	0	0	0	0	0	0	0	0	0	0	0	0	0	0	0	0	0	0.03151	0	0	0	0	0	0	0	0	0	0	0	0	0	0	0
d__Fungi|p__Basidiomycota|c__Agaricomycetes|o__Agaricales|f__Marasmiaceae|g__Flammulina|s__Flammulina_velutipes	0	0	0	0	0	0	0	0	0	0	0	0	0	0	0	0	0	0	0	0	0	0	0	0	0	0	0	0	0	0	0	0	0	0.03151	0	0	0	0	0	0	0	0	0	0	0	0	0	0	0
d__Fungi|p__Basidiomycota|c__Agaricomycetes|o__Agaricales|f__Marasmiaceae|g__Marasmiellus	0	0	0	0	0	0	0	0	0	0	0	0	0	0	0	0	0	0	0	0	0	0	0.0113	0	0.00986	0.00641	0	0	0	0	0	0	0	0	0	0	0	0	0	0	0	0	0	0	0	0	0	0	0
d__Fungi|p__Basidiomycota|c__Agaricomycetes|o__Agaricales|f__Marasmiaceae|g__Marasmiellus|s__Marasmiellus_palmivorus	0	0	0	0	0	0	0	0	0	0	0	0	0	0	0	0	0	0	0	0	0	0	0.0113	0	0.00986	0.00641	0	0	0	0	0	0	0	0	0	0	0	0	0	0	0	0	0	0	0	0	0	0	0
d__Fungi|p__Basidiomycota|c__Agaricomycetes|o__Agaricales|f__Mycenaceae	0	0	0	0	0	8.45779	0	0	0	0	0	0	0	0	0	0	0	4.04238	0	0	0	0	0	0.05087	0.00493	0	0	0	0.03696	0	0	0.05501	0	0	0	0	0	0	0	0.17591	0	0	0	0	0	0	0	0	0
d__Fungi|p__Basidiomycota|c__Agaricomycetes|o__Agaricales|f__Mycenaceae|g__Mycena	0	0	0	0	0	8.45779	0	0	0	0	0	0	0	0	0	0	0	0	0	0	0	0	0	0	0.00493	0	0	0	0	0	0	0	0	0	0	0	0	0	0	0	0	0	0	0	0	0	0	0	0
d__Fungi|p__Basidiomycota|c__Agaricomycetes|o__Agaricales|f__Mycenaceae|g__Mycena|s__Mycena_sanguinolenta	0	0	0	0	0	8.45779	0	0	0	0	0	0	0	0	0	0	0	0	0	0	0	0	0	0	0	0	0	0	0	0	0	0	0	0	0	0	0	0	0	0	0	0	0	0	0	0	0	0	0
d__Fungi|p__Basidiomycota|c__Agaricomycetes|o__Agaricales|f__Mycenaceae|g__Mycena|s__Mycena_unclassified	0	0	0	0	0	0	0	0	0	0	0	0	0	0	0	0	0	0	0	0	0	0	0	0	0.00493	0	0	0	0	0	0	0	0	0	0	0	0	0	0	0	0	0	0	0	0	0	0	0	0
d__Fungi|p__Basidiomycota|c__Agaricomycetes|o__Agaricales|f__Mycenaceae|g__Sarcomyxa	0	0	0	0	0	0	0	0	0	0	0	0	0	0	0	0	0	4.04238	0	0	0	0	0	0.05087	0	0	0	0	0.03696	0	0	0.05501	0	0	0	0	0	0	0	0.17591	0	0	0	0	0	0	0	0	0
d__Fungi|p__Basidiomycota|c__Agaricomycetes|o__Agaricales|f__Mycenaceae|g__Sarcomyxa|s__Sarcomyxa_serotina	0	0	0	0	0	0	0	0	0	0	0	0	0	0	0	0	0	4.04238	0	0	0	0	0	0.05087	0	0	0	0	0.03696	0	0	0.05501	0	0	0	0	0	0	0	0.17591	0	0	0	0	0	0	0	0	0
d__Fungi|p__Basidiomycota|c__Agaricomycetes|o__Agaricales|f__Pleurotaceae	0	0	0	0	0	0	0	0	0	0	0	0	0	0	0	0	0	0	0	0	0	0	0	0	0	0	0	0	0	0	0	0	0	0	0.00874	0	1.32306	0	0	0	0	0	0.59079	0	0	0	0	0	0
d__Fungi|p__Basidiomycota|c__Agaricomycetes|o__Agaricales|f__Pleurotaceae|g__Pleurotus	0	0	0	0	0	0	0	0	0	0	0	0	0	0	0	0	0	0	0	0	0	0	0	0	0	0	0	0	0	0	0	0	0	0	0.00874	0	1.32306	0	0	0	0	0	0.59079	0	0	0	0	0	0
d__Fungi|p__Basidiomycota|c__Agaricomycetes|o__Agaricales|f__Pleurotaceae|g__Pleurotus|s__Pleurotus_eryngii	0	0	0	0	0	0	0	0	0	0	0	0	0	0	0	0	0	0	0	0	0	0	0	0	0	0	0	0	0	0	0	0	0	0	0.00874	0	0	0	0	0	0	0	0.59079	0	0	0	0	0	0
d__Fungi|p__Basidiomycota|c__Agaricomycetes|o__Agaricales|f__Pleurotaceae|g__Pleurotus|s__Pleurotus_unclassified	0	0	0	0	0	0	0	0	0	0	0	0	0	0	0	0	0	0	0	0	0	0	0	0	0	0	0	0	0	0	0	0	0	0	0	0	1.32306	0	0	0	0	0	0	0	0	0	0	0	0
d__Fungi|p__Basidiomycota|c__Agaricomycetes|o__Agaricales|f__Psathyrellaceae	0	0	0	0	0	0	0	0	0	0	0	0	0	0	0	0	0	8.43148	0	0	0	0	0.02763	20.3512	0.00493	0.00257	0	0	0.06072	0	0	0.0873	0.00257	1.50984	0	0	0	0	0	0.47713	0	0	0	0	0.11837	0	0	0	0
d__Fungi|p__Basidiomycota|c__Agaricomycetes|o__Agaricales|f__Psathyrellaceae|g__Coprinellus	0	0	0	0	0	0	0	0	0	0	0	0	0	0	0	0	0	0	0	0	0	0	0	0	0	0	0	0	0	0	0	0	0	0	0	0	0	0	0	0	0	0	0	0	0	0	0	0	0
d__Fungi|p__Basidiomycota|c__Agaricomycetes|o__Agaricales|f__Psathyrellaceae|g__Coprinellus|s__Coprinellus_bisporus	0	0	0	0	0	0	0	0	0	0	0	0	0	0	0	0	0	0	0	0	0	0	0	0	0	0	0	0	0	0	0	0	0	0	0	0	0	0	0	0	0	0	0	0	0	0	0	0	0
d__Fungi|p__Basidiomycota|c__Agaricomycetes|o__Agaricales|f__Psathyrellaceae|g__Coprinellus|s__Coprinellus_disseminatus	0	0	0	0	0	0	0	0	0	0	0	0	0	0	0	0	0	0	0	0	0	0	0	0	0	0	0	0	0	0	0	0	0	0	0	0	0	0	0	0	0	0	0	0	0	0	0	0	0
d__Fungi|p__Basidiomycota|c__Agaricomycetes|o__Agaricales|f__Psathyrellaceae|g__Coprinellus|s__Coprinellus_plagioporus	0	0	0	0	0	0	0	0	0	0	0	0	0	0	0	0	0	0	0	0	0	0	0	0	0	0	0	0	0	0	0	0	0	0	0	0	0	0	0	0	0	0	0	0	0	0	0	0	0
d__Fungi|p__Basidiomycota|c__Agaricomycetes|o__Agaricales|f__Psathyrellaceae|g__Coprinellus|s__Coprinellus_verrucispermus	0	0	0	0	0	0	0	0	0	0	0	0	0	0	0	0	0	0	0	0	0	0	0	0	0	0	0	0	0	0	0	0	0	0	0	0	0	0	0	0	0	0	0	0	0	0	0	0	0
d__Fungi|p__Basidiomycota|c__Agaricomycetes|o__Agaricales|f__Psathyrellaceae|g__Coprinopsis	0	0	0	0	0	0	0	0	0	0	0	0	0	0	0	0	0	8.43148	0	0	0	0	0.02763	0.1053	0.00493	0.00257	0	0	0.06072	0	0	0.0873	0.00257	1.50984	0	0	0	0	0	0.47713	0	0	0	0	0	0	0	0	0
d__Fungi|p__Basidiomycota|c__Agaricomycetes|o__Agaricales|f__Psathyrellaceae|g__Coprinopsis|s__Coprinopsis_cinerea	0	0	0	0	0	0	0	0	0	0	0	0	0	0	0	0	0	8.43148	0	0	0	0	0.02763	0.1053	0	0	0	0	0.06072	0	0	0.0873	0	0	0	0	0	0	0	0.47713	0	0	0	0	0	0	0	0	0
d__Fungi|p__Basidiomycota|c__Agaricomycetes|o__Agaricales|f__Psathyrellaceae|g__Coprinopsis|s__Coprinopsis_clastophylla	0	0	0	0	0	0	0	0	0	0	0	0	0	0	0	0	0	0	0	0	0	0	0	0	0	0	0	0	0	0	0	0	0.00257	1.50984	0	0	0	0	0	0	0	0	0	0	0	0	0	0	0
d__Fungi|p__Basidiomycota|c__Agaricomycetes|o__Agaricales|f__Psathyrellaceae|g__Coprinopsis|s__Coprinopsis_semitalis	0	0	0	0	0	0	0	0	0	0	0	0	0	0	0	0	0	0	0	0	0	0	0	0	0	0	0	0	0	0	0	0	0	0	0	0	0	0	0	0	0	0	0	0	0	0	0	0	0
d__Fungi|p__Basidiomycota|c__Agaricomycetes|o__Agaricales|f__Psathyrellaceae|g__Coprinopsis|s__Coprinopsis_urticicola	0	0	0	0	0	0	0	0	0	0	0	0	0	0	0	0	0	0	0	0	0	0	0	0	0.00493	0.00257	0	0	0	0	0	0	0	0	0	0	0	0	0	0	0	0	0	0	0	0	0	0	0
d__Fungi|p__Basidiomycota|c__Agaricomycetes|o__Agaricales|f__Psathyrellaceae|g__Psathyrella	0	0	0	0	0	0	0	0	0	0	0	0	0	0	0	0	0	0	0	0	0	0	0	20.2459	0	0	0	0	0	0	0	0	0	0	0	0	0	0	0	0	0	0	0	0	0.11837	0	0	0	0
d__Fungi|p__Basidiomycota|c__Agaricomycetes|o__Agaricales|f__Psathyrellaceae|g__Psathyrella|s__Psathyrella_candolleana	0	0	0	0	0	0	0	0	0	0	0	0	0	0	0	0	0	0	0	0	0	0	0	20.2459	0	0	0	0	0	0	0	0	0	0	0	0	0	0	0	0	0	0	0	0	0.11837	0	0	0	0
d__Fungi|p__Basidiomycota|c__Agaricomycetes|o__Agaricales|f__Tricholomataceae	0	0	0	0	0	0	0	0	0	0	0	0	0	0	0	0	0	0	0	0	0	0.7076	0	0	0	0	0	0	0.00264	0	0	0	0	0	0	0	0.02588	0	0	0	0	0	0	0	0	0	0	0	0
d__Fungi|p__Basidiomycota|c__Agaricomycetes|o__Agaricales|f__Tricholomataceae|g__Dermoloma	0	0	0	0	0	0	0	0	0	0	0	0	0	0	0	0	0	0	0	0	0	0.7076	0	0	0	0	0	0	0	0	0	0	0	0	0	0	0	0	0	0	0	0	0	0	0	0	0	0	0
d__Fungi|p__Basidiomycota|c__Agaricomycetes|o__Agaricales|f__Tricholomataceae|g__Dermoloma|s__Dermoloma_pseudocuneifolium	0	0	0	0	0	0	0	0	0	0	0	0	0	0	0	0	0	0	0	0	0	0.7076	0	0	0	0	0	0	0	0	0	0	0	0	0	0	0	0	0	0	0	0	0	0	0	0	0	0	0
d__Fungi|p__Basidiomycota|c__Agaricomycetes|o__Agaricales|f__Tricholomataceae|g__Lepista	0	0	0	0	0	0	0	0	0	0	0	0	0	0	0	0	0	0	0	0	0	0	0	0	0	0	0	0	0.00264	0	0	0	0	0	0	0	0.02588	0	0	0	0	0	0	0	0	0	0	0	0
d__Fungi|p__Basidiomycota|c__Agaricomycetes|o__Agaricales|f__Tricholomataceae|g__Lepista|s__Lepista_sordida	0	0	0	0	0	0	0	0	0	0	0	0	0	0	0	0	0	0	0	0	0	0	0	0	0	0	0	0	0.00264	0	0	0	0	0	0	0	0.02588	0	0	0	0	0	0	0	0	0	0	0	0
d__Fungi|p__Basidiomycota|c__Agaricomycetes|o__Agaricales|f__Typhulaceae	0	0	0	0	0.02174	0	0	0	0	0	0.00598	0.02855	36.0429	0	0	0	0	0	0	0	0	0	0	0	0	0	0	0	0	0	0	0	0	0	0	0	0	0	0	0	0	0	0	0	0	0	0	0	0
d__Fungi|p__Basidiomycota|c__Agaricomycetes|o__Agaricales|f__Typhulaceae|g__Typhula	0	0	0	0	0.02174	0	0	0	0	0	0.00598	0.02855	36.0429	0	0	0	0	0	0	0	0	0	0	0	0	0	0	0	0	0	0	0	0	0	0	0	0	0	0	0	0	0	0	0	0	0	0	0	0
d__Fungi|p__Basidiomycota|c__Agaricomycetes|o__Agaricales|f__Typhulaceae|g__Typhula|s__Typhula_maritima	0	0	0	0	0.02174	0	0	0	0	0	0.00598	0.02855	36.0429	0	0	0	0	0	0	0	0	0	0	0	0	0	0	0	0	0	0	0	0	0	0	0	0	0	0	0	0	0	0	0	0	0	0	0	0
d__Fungi|p__Basidiomycota|c__Agaricomycetes|o__Agaricomycetes_unclassified	0	0	0	0	0	0	0	0	0	0	0	0	0	0	0	0	0	0	0	0	0	0.04551	0.00502	0	0	0	0	0	0.00264	0.004	0	0	0	0.00252	0	0	0	0	0	0	0	0	0	12.192	0	0	0.00493	0	0
d__Fungi|p__Basidiomycota|c__Agaricomycetes|o__Agaricomycetes_unclassified|f__Agaricomycetes_unclassified	0	0	0	0	0	0	0	0	0	0	0	0	0	0	0	0	0	0	0	0	0	0.04551	0.00502	0	0	0	0	0	0.00264	0.004	0	0	0	0.00252	0	0	0	0	0	0	0	0	0	12.192	0	0	0.00493	0	0
d__Fungi|p__Basidiomycota|c__Agaricomycetes|o__Agaricomycetes_unclassified|f__Agaricomycetes_unclassified|g__Agaricomycetes_unclassified	0	0	0	0	0	0	0	0	0	0	0	0	0	0	0	0	0	0	0	0	0	0.04551	0.00502	0	0	0	0	0	0.00264	0.004	0	0	0	0.00252	0	0	0	0	0	0	0	0	0	12.192	0	0	0.00493	0	0
d__Fungi|p__Basidiomycota|c__Agaricomycetes|o__Agaricomycetes_unclassified|f__Agaricomycetes_unclassified|g__Agaricomycetes_unclassified|s__Agaricomycetes_unclassified	0	0	0	0	0	0	0	0	0	0	0	0	0	0	0	0	0	0	0	0	0	0.04551	0.00502	0	0	0	0	0	0.00264	0.004	0	0	0	0.00252	0	0	0	0	0	0	0	0	0	12.192	0	0	0.00493	0	0
d__Fungi|p__Basidiomycota|c__Agaricomycetes|o__Atheliales	0	0	0	0	0	0	0	0	0	0	0	0	0	0	0	0	0	0	0	0	0	0	0	0	0	0	0	0	0	0	0	0	0	0	0	0	0	0	0	0	0	0	0	0	0	0	0.00616	0	0
d__Fungi|p__Basidiomycota|c__Agaricomycetes|o__Atheliales|f__Atheliaceae	0	0	0	0	0	0	0	0	0	0	0	0	0	0	0	0	0	0	0	0	0	0	0	0	0	0	0	0	0	0	0	0	0	0	0	0	0	0	0	0	0	0	0	0	0	0	0.00616	0	0
d__Fungi|p__Basidiomycota|c__Agaricomycetes|o__Atheliales|f__Atheliaceae|g__Cristinia	0	0	0	0	0	0	0	0	0	0	0	0	0	0	0	0	0	0	0	0	0	0	0	0	0	0	0	0	0	0	0	0	0	0	0	0	0	0	0	0	0	0	0	0	0	0	0.00616	0	0
d__Fungi|p__Basidiomycota|c__Agaricomycetes|o__Atheliales|f__Atheliaceae|g__Cristinia|s__Cristinia_helvetica	0	0	0	0	0	0	0	0	0	0	0	0	0	0	0	0	0	0	0	0	0	0	0	0	0	0	0	0	0	0	0	0	0	0	0	0	0	0	0	0	0	0	0	0	0	0	0.00616	0	0
d__Fungi|p__Basidiomycota|c__Agaricomycetes|o__Auriculariales	0.18123	0	0	0	0	0	0	0	0	0	0	0	0	0	0.10299	5.2057	0	0.00413	0	0	0	0	0	0	0	0	0	0	0.00528	0	0	0	0	0	0	0	0	0	0	0	0	0	0	0	0	0	0	0	0
d__Fungi|p__Basidiomycota|c__Agaricomycetes|o__Auriculariales|f__Auriculariales_Incertae_sedis	0.18123	0	0	0	0	0	0	0	0	0	0	0	0	0	0.10299	5.2057	0	0.00413	0	0	0	0	0	0	0	0	0	0	0.00528	0	0	0	0	0	0	0	0	0	0	0	0	0	0	0	0	0	0	0	0
d__Fungi|p__Basidiomycota|c__Agaricomycetes|o__Auriculariales|f__Auriculariales_Incertae_sedis|g__Auriculariales_Incertae_sedis_unclassified	0.18123	0	0	0	0	0	0	0	0	0	0	0	0	0	0.10299	5.2057	0	0.00413	0	0	0	0	0	0	0	0	0	0	0.00528	0	0	0	0	0	0	0	0	0	0	0	0	0	0	0	0	0	0	0	0
d__Fungi|p__Basidiomycota|c__Agaricomycetes|o__Auriculariales|f__Auriculariales_Incertae_sedis|g__Auriculariales_Incertae_sedis_unclassified|s__Auriculariales_Incertae_sedis_unclassified	0.18123	0	0	0	0	0	0	0	0	0	0	0	0	0	0.10299	5.2057	0	0.00413	0	0	0	0	0	0	0	0	0	0	0.00528	0	0	0	0	0	0	0	0	0	0	0	0	0	0	0	0	0	0	0	0
d__Fungi|p__Basidiomycota|c__Agaricomycetes|o__Boletales	0	0	0	0	0	0	0	0	0	0	0	0	0	0	0	0	0	0	0	0	0	0	0	0	0.00986	0.00898	0	0	0	0	0	0	0	0	0	0	0	0	0	0	0	0	0	0	0	0	0	0	0
d__Fungi|p__Basidiomycota|c__Agaricomycetes|o__Boletales|f__Gyroporaceae	0	0	0	0	0	0	0	0	0	0	0	0	0	0	0	0	0	0	0	0	0	0	0	0	0.0037	0	0	0	0	0	0	0	0	0	0	0	0	0	0	0	0	0	0	0	0	0	0	0	0
d__Fungi|p__Basidiomycota|c__Agaricomycetes|o__Boletales|f__Gyroporaceae|g__Gyroporus	0	0	0	0	0	0	0	0	0	0	0	0	0	0	0	0	0	0	0	0	0	0	0	0	0.0037	0	0	0	0	0	0	0	0	0	0	0	0	0	0	0	0	0	0	0	0	0	0	0	0
d__Fungi|p__Basidiomycota|c__Agaricomycetes|o__Boletales|f__Gyroporaceae|g__Gyroporus|s__Gyroporus_castaneus	0	0	0	0	0	0	0	0	0	0	0	0	0	0	0	0	0	0	0	0	0	0	0	0	0.0037	0	0	0	0	0	0	0	0	0	0	0	0	0	0	0	0	0	0	0	0	0	0	0	0
d__Fungi|p__Basidiomycota|c__Agaricomycetes|o__Boletales|f__Sclerodermataceae	0	0	0	0	0	0	0	0	0	0	0	0	0	0	0	0	0	0	0	0	0	0	0	0	0.00616	0.00898	0	0	0	0	0	0	0	0	0	0	0	0	0	0	0	0	0	0	0	0	0	0	0
d__Fungi|p__Basidiomycota|c__Agaricomycetes|o__Boletales|f__Sclerodermataceae|g__Astraeus	0	0	0	0	0	0	0	0	0	0	0	0	0	0	0	0	0	0	0	0	0	0	0	0	0.00616	0.00898	0	0	0	0	0	0	0	0	0	0	0	0	0	0	0	0	0	0	0	0	0	0	0
d__Fungi|p__Basidiomycota|c__Agaricomycetes|o__Boletales|f__Sclerodermataceae|g__Astraeus|s__Astraeus_pteridis	0	0	0	0	0	0	0	0	0	0	0	0	0	0	0	0	0	0	0	0	0	0	0	0	0.00616	0.00898	0	0	0	0	0	0	0	0	0	0	0	0	0	0	0	0	0	0	0	0	0	0	0
d__Fungi|p__Basidiomycota|c__Agaricomycetes|o__Cantharellales	0	0	0	0	0	0	0.00255	0	0	0	0	0	0	0	0	0	0	0	0	0	0	0	0	0	0	0	0	0	0	0	0	0	0	0	0	0	0	0	0	0	0	0	0	0	0	0	0.00247	0	0
d__Fungi|p__Basidiomycota|c__Agaricomycetes|o__Cantharellales|f__Cantharellales_fam_Incertae_sedis	0	0	0	0	0	0	0	0	0	0	0	0	0	0	0	0	0	0	0	0	0	0	0	0	0	0	0	0	0	0	0	0	0	0	0	0	0	0	0	0	0	0	0	0	0	0	0.00247	0	0
d__Fungi|p__Basidiomycota|c__Agaricomycetes|o__Cantharellales|f__Cantharellales_fam_Incertae_sedis|g__Cantharellales_fam_Incertae_sedis_unclassified	0	0	0	0	0	0	0	0	0	0	0	0	0	0	0	0	0	0	0	0	0	0	0	0	0	0	0	0	0	0	0	0	0	0	0	0	0	0	0	0	0	0	0	0	0	0	0	0	0
d__Fungi|p__Basidiomycota|c__Agaricomycetes|o__Cantharellales|f__Cantharellales_fam_Incertae_sedis|g__Cantharellales_fam_Incertae_sedis_unclassified|s__Cantharellales_fam_Incertae_sedis_unclassified	0	0	0	0	0	0	0	0	0	0	0	0	0	0	0	0	0	0	0	0	0	0	0	0	0	0	0	0	0	0	0	0	0	0	0	0	0	0	0	0	0	0	0	0	0	0	0	0	0
d__Fungi|p__Basidiomycota|c__Agaricomycetes|o__Cantharellales|f__Cantharellales_fam_Incertae_sedis|g__Minimedusa	0	0	0	0	0	0	0	0	0	0	0	0	0	0	0	0	0	0	0	0	0	0	0	0	0	0	0	0	0	0	0	0	0	0	0	0	0	0	0	0	0	0	0	0	0	0	0.00247	0	0
d__Fungi|p__Basidiomycota|c__Agaricomycetes|o__Cantharellales|f__Cantharellales_fam_Incertae_sedis|g__Minimedusa|s__Minimedusa_polyspora	0	0	0	0	0	0	0	0	0	0	0	0	0	0	0	0	0	0	0	0	0	0	0	0	0	0	0	0	0	0	0	0	0	0	0	0	0	0	0	0	0	0	0	0	0	0	0.00247	0	0
d__Fungi|p__Basidiomycota|c__Agaricomycetes|o__Cantharellales|f__Ceratobasidiaceae	0	0	0	0	0	0	0.00255	0	0	0	0	0	0	0	0	0	0	0	0	0	0	0	0	0	0	0	0	0	0	0	0	0	0	0	0	0	0	0	0	0	0	0	0	0	0	0	0	0	0
d__Fungi|p__Basidiomycota|c__Agaricomycetes|o__Cantharellales|f__Ceratobasidiaceae|g__Ceratobasidium	0	0	0	0	0	0	0	0	0	0	0	0	0	0	0	0	0	0	0	0	0	0	0	0	0	0	0	0	0	0	0	0	0	0	0	0	0	0	0	0	0	0	0	0	0	0	0	0	0
d__Fungi|p__Basidiomycota|c__Agaricomycetes|o__Cantharellales|f__Ceratobasidiaceae|g__Ceratobasidium|s__Ceratobasidium_sp_AG_Fb	0	0	0	0	0	0	0	0	0	0	0	0	0	0	0	0	0	0	0	0	0	0	0	0	0	0	0	0	0	0	0	0	0	0	0	0	0	0	0	0	0	0	0	0	0	0	0	0	0
d__Fungi|p__Basidiomycota|c__Agaricomycetes|o__Cantharellales|f__Ceratobasidiaceae|g__Ceratorhiza	0	0	0	0	0	0	0.00255	0	0	0	0	0	0	0	0	0	0	0	0	0	0	0	0	0	0	0	0	0	0	0	0	0	0	0	0	0	0	0	0	0	0	0	0	0	0	0	0	0	0
d__Fungi|p__Basidiomycota|c__Agaricomycetes|o__Cantharellales|f__Ceratobasidiaceae|g__Ceratorhiza|s__Ceratorhiza_oryzae_sativae	0	0	0	0	0	0	0.00255	0	0	0	0	0	0	0	0	0	0	0	0	0	0	0	0	0	0	0	0	0	0	0	0	0	0	0	0	0	0	0	0	0	0	0	0	0	0	0	0	0	0
d__Fungi|p__Basidiomycota|c__Agaricomycetes|o__Corticiales	0	0	0	0.01339	0	0	0	0	0	0	0	0.12589	0	0	0	0	0	0	0.01632	38.1844	0	0	0	0	0	0	0	0.00649	0	0	0	0	0.00771	22.746	0	0	0	0	0	0	0	0.09189	0	0	0	0	0	0	0.00714
d__Fungi|p__Basidiomycota|c__Agaricomycetes|o__Corticiales|f__Corticiaceae	0	0	0	0.01339	0	0	0	0	0	0	0	0.12589	0	0	0	0	0	0	0.01632	38.1844	0	0	0	0	0	0	0	0.00649	0	0	0	0	0.00771	22.746	0	0	0	0	0	0	0	0.09189	0	0	0	0	0	0	0.00714
d__Fungi|p__Basidiomycota|c__Agaricomycetes|o__Corticiales|f__Corticiaceae|g__Limonomyces	0	0	0	0.01339	0	0	0	0	0	0	0	0.12589	0	0	0	0	0	0	0.01632	38.1844	0	0	0	0	0	0	0	0.00649	0	0	0	0	0.00771	22.746	0	0	0	0	0	0	0	0.09189	0	0	0	0	0	0	0.00714
d__Fungi|p__Basidiomycota|c__Agaricomycetes|o__Corticiales|f__Corticiaceae|g__Limonomyces|s__Limonomyces_culmigenus	0	0	0	0.01339	0	0	0	0	0	0	0	0.12589	0	0	0	0	0	0	0.01632	38.1844	0	0	0	0	0	0	0	0.00649	0	0	0	0	0.00771	22.746	0	0	0	0	0	0	0	0.09189	0	0	0	0	0	0	0.00714
d__Fungi|p__Basidiomycota|c__Agaricomycetes|o__Hymenochaetales	0	0	0	0	0	0	0	0	0	0	0	0	0	0	0	0	0	0	0	0	0	0	0	0	0	0	0	0	0	0	0	0	0	0	0	0	0	0	0	0	0	0	0.20393	0	0	0	0	0	0
d__Fungi|p__Basidiomycota|c__Agaricomycetes|o__Hymenochaetales|f__Schizoporaceae	0	0	0	0	0	0	0	0	0	0	0	0	0	0	0	0	0	0	0	0	0	0	0	0	0	0	0	0	0	0	0	0	0	0	0	0	0	0	0	0	0	0	0.20393	0	0	0	0	0	0
d__Fungi|p__Basidiomycota|c__Agaricomycetes|o__Hymenochaetales|f__Schizoporaceae|g__Hyphodontia	0	0	0	0	0	0	0	0	0	0	0	0	0	0	0	0	0	0	0	0	0	0	0	0	0	0	0	0	0	0	0	0	0	0	0	0	0	0	0	0	0	0	0.20393	0	0	0	0	0	0
d__Fungi|p__Basidiomycota|c__Agaricomycetes|o__Hymenochaetales|f__Schizoporaceae|g__Hyphodontia|s__Hyphodontia_alutaria	0	0	0	0	0	0	0	0	0	0	0	0	0	0	0	0	0	0	0	0	0	0	0	0	0	0	0	0	0	0	0	0	0	0	0	0	0	0	0	0	0	0	0	0	0	0	0	0	0
d__Fungi|p__Basidiomycota|c__Agaricomycetes|o__Hymenochaetales|f__Schizoporaceae|g__Hyphodontia|s__Hyphodontia_unclassified	0	0	0	0	0	0	0	0	0	0	0	0	0	0	0	0	0	0	0	0	0	0	0	0	0	0	0	0	0	0	0	0	0	0	0	0	0	0	0	0	0	0	0.20393	0	0	0	0	0	0
d__Fungi|p__Basidiomycota|c__Agaricomycetes|o__Polyporales	0	0.07719	0	0	0.98992	0	0	0	0	0	0	0	0	0	0	0	0	0	0	0	0.02015	0	0	0	0	0.02822	0	0	0.00264	0	0	0	0	0	0.14725	0	0	0	0	0	0	0	0	0	0.02118	0	0	0	0
d__Fungi|p__Basidiomycota|c__Agaricomycetes|o__Polyporales|f__Ganodermataceae	0	0	0	0	0	0	0	0	0	0	0	0	0	0	0	0	0	0	0	0	0	0	0	0	0	0	0	0	0	0	0	0	0	0	0	0	0	0	0	0	0	0	0	0	0	0	0	0	0
d__Fungi|p__Basidiomycota|c__Agaricomycetes|o__Polyporales|f__Ganodermataceae|g__Ganoderma	0	0	0	0	0	0	0	0	0	0	0	0	0	0	0	0	0	0	0	0	0	0	0	0	0	0	0	0	0	0	0	0	0	0	0	0	0	0	0	0	0	0	0	0	0	0	0	0	0
d__Fungi|p__Basidiomycota|c__Agaricomycetes|o__Polyporales|f__Ganodermataceae|g__Ganoderma|s__Ganoderma_applanatum	0	0	0	0	0	0	0	0	0	0	0	0	0	0	0	0	0	0	0	0	0	0	0	0	0	0	0	0	0	0	0	0	0	0	0	0	0	0	0	0	0	0	0	0	0	0	0	0	0
d__Fungi|p__Basidiomycota|c__Agaricomycetes|o__Polyporales|f__Hapalopilaceae	0	0	0	0	0	0	0	0	0	0	0	0	0	0	0	0	0	0	0	0	0	0	0	0	0	0	0	0	0	0	0	0	0	0	0	0	0	0	0	0	0	0	0	0	0.02118	0	0	0	0
d__Fungi|p__Basidiomycota|c__Agaricomycetes|o__Polyporales|f__Hapalopilaceae|g__Bjerkandera	0	0	0	0	0	0	0	0	0	0	0	0	0	0	0	0	0	0	0	0	0	0	0	0	0	0	0	0	0	0	0	0	0	0	0	0	0	0	0	0	0	0	0	0	0.02118	0	0	0	0
d__Fungi|p__Basidiomycota|c__Agaricomycetes|o__Polyporales|f__Hapalopilaceae|g__Bjerkandera|s__Bjerkandera_adusta	0	0	0	0	0	0	0	0	0	0	0	0	0	0	0	0	0	0	0	0	0	0	0	0	0	0	0	0	0	0	0	0	0	0	0	0	0	0	0	0	0	0	0	0	0.02118	0	0	0	0
d__Fungi|p__Basidiomycota|c__Agaricomycetes|o__Polyporales|f__Hapalopilaceae|g__Ceriporia	0	0	0	0	0	0	0	0	0	0	0	0	0	0	0	0	0	0	0	0	0	0	0	0	0	0	0	0	0	0	0	0	0	0	0	0	0	0	0	0	0	0	0	0	0	0	0	0	0
d__Fungi|p__Basidiomycota|c__Agaricomycetes|o__Polyporales|f__Hapalopilaceae|g__Ceriporia|s__Ceriporia_lacerata	0	0	0	0	0	0	0	0	0	0	0	0	0	0	0	0	0	0	0	0	0	0	0	0	0	0	0	0	0	0	0	0	0	0	0	0	0	0	0	0	0	0	0	0	0	0	0	0	0
d__Fungi|p__Basidiomycota|c__Agaricomycetes|o__Polyporales|f__Polyporaceae	0	0.07719	0	0	0	0	0	0	0	0	0	0	0	0	0	0	0	0	0	0	0.02015	0	0	0	0	0.02822	0	0	0	0	0	0	0	0	0.14725	0	0	0	0	0	0	0	0	0	0	0	0	0	0
d__Fungi|p__Basidiomycota|c__Agaricomycetes|o__Polyporales|f__Polyporaceae|g__Trametes	0	0.07719	0	0	0	0	0	0	0	0	0	0	0	0	0	0	0	0	0	0	0.02015	0	0	0	0	0.02822	0	0	0	0	0	0	0	0	0.14725	0	0	0	0	0	0	0	0	0	0	0	0	0	0
d__Fungi|p__Basidiomycota|c__Agaricomycetes|o__Polyporales|f__Polyporaceae|g__Trametes|s__Trametes_gibbosa	0	0.07719	0	0	0	0	0	0	0	0	0	0	0	0	0	0	0	0	0	0	0	0	0	0	0	0.02822	0	0	0	0	0	0	0	0	0	0	0	0	0	0	0	0	0	0	0	0	0	0	0
d__Fungi|p__Basidiomycota|c__Agaricomycetes|o__Polyporales|f__Polyporaceae|g__Trametes|s__Trametes_hirsuta	0	0	0	0	0	0	0	0	0	0	0	0	0	0	0	0	0	0	0	0	0	0	0	0	0	0	0	0	0	0	0	0	0	0	0.14725	0	0	0	0	0	0	0	0	0	0	0	0	0	0
d__Fungi|p__Basidiomycota|c__Agaricomycetes|o__Polyporales|f__Polyporaceae|g__Trametes|s__Trametes_pubescens	0	0	0	0	0	0	0	0	0	0	0	0	0	0	0	0	0	0	0	0	0	0	0	0	0	0	0	0	0	0	0	0	0	0	0	0	0	0	0	0	0	0	0	0	0	0	0	0	0
d__Fungi|p__Basidiomycota|c__Agaricomycetes|o__Polyporales|f__Polyporaceae|g__Trametes|s__Trametes_versicolor	0	0	0	0	0	0	0	0	0	0	0	0	0	0	0	0	0	0	0	0	0.02015	0	0	0	0	0	0	0	0	0	0	0	0	0	0	0	0	0	0	0	0	0	0	0	0	0	0	0	0
d__Fungi|p__Basidiomycota|c__Agaricomycetes|o__Polyporales|f__Polyporales_unclassified	0	0	0	0	0.98992	0	0	0	0	0	0	0	0	0	0	0	0	0	0	0	0	0	0	0	0	0	0	0	0.00264	0	0	0	0	0	0	0	0	0	0	0	0	0	0	0	0	0	0	0	0
d__Fungi|p__Basidiomycota|c__Agaricomycetes|o__Polyporales|f__Polyporales_unclassified|g__Polyporales_unclassified	0	0	0	0	0.98992	0	0	0	0	0	0	0	0	0	0	0	0	0	0	0	0	0	0	0	0	0	0	0	0.00264	0	0	0	0	0	0	0	0	0	0	0	0	0	0	0	0	0	0	0	0
d__Fungi|p__Basidiomycota|c__Agaricomycetes|o__Polyporales|f__Polyporales_unclassified|g__Polyporales_unclassified|s__Polyporales_unclassified	0	0	0	0	0.98992	0	0	0	0	0	0	0	0	0	0	0	0	0	0	0	0	0	0	0	0	0	0	0	0.00264	0	0	0	0	0	0	0	0	0	0	0	0	0	0	0	0	0	0	0	0
d__Fungi|p__Basidiomycota|c__Agaricomycetes|o__Russulales	0	0	0	0	0	0	0.00511	0	0	0	0.54789	0	0	0	0	0	0	0	0	0	0	0	0	0	0.02835	0.03336	0	0	0	0	0	0	0	0	0	0	0	0	0	0	0	0	0	0	0	0	0.0037	0	0
d__Fungi|p__Basidiomycota|c__Agaricomycetes|o__Russulales|f__Peniophoraceae	0	0	0	0	0	0	0	0	0	0	0.54789	0	0	0	0	0	0	0	0	0	0	0	0	0	0	0.00257	0	0	0	0	0	0	0	0	0	0	0	0	0	0	0	0	0	0	0	0	0	0	0
d__Fungi|p__Basidiomycota|c__Agaricomycetes|o__Russulales|f__Peniophoraceae|g__Peniophora	0	0	0	0	0	0	0	0	0	0	0.54789	0	0	0	0	0	0	0	0	0	0	0	0	0	0	0	0	0	0	0	0	0	0	0	0	0	0	0	0	0	0	0	0	0	0	0	0	0	0
d__Fungi|p__Basidiomycota|c__Agaricomycetes|o__Russulales|f__Peniophoraceae|g__Peniophora|s__Peniophora_unclassified	0	0	0	0	0	0	0	0	0	0	0.54789	0	0	0	0	0	0	0	0	0	0	0	0	0	0	0	0	0	0	0	0	0	0	0	0	0	0	0	0	0	0	0	0	0	0	0	0	0	0
d__Fungi|p__Basidiomycota|c__Agaricomycetes|o__Russulales|f__Peniophoraceae|g__Subulicystidium	0	0	0	0	0	0	0	0	0	0	0	0	0	0	0	0	0	0	0	0	0	0	0	0	0	0.00257	0	0	0	0	0	0	0	0	0	0	0	0	0	0	0	0	0	0	0	0	0	0	0
d__Fungi|p__Basidiomycota|c__Agaricomycetes|o__Russulales|f__Peniophoraceae|g__Subulicystidium|s__Subulicystidium_unclassified	0	0	0	0	0	0	0	0	0	0	0	0	0	0	0	0	0	0	0	0	0	0	0	0	0	0.00257	0	0	0	0	0	0	0	0	0	0	0	0	0	0	0	0	0	0	0	0	0	0	0
d__Fungi|p__Basidiomycota|c__Agaricomycetes|o__Russulales|f__Russulaceae	0	0	0	0	0	0	0	0	0	0	0	0	0	0	0	0	0	0	0	0	0	0	0	0	0.02835	0.03079	0	0	0	0	0	0	0	0	0	0	0	0	0	0	0	0	0	0	0	0	0.0037	0	0
d__Fungi|p__Basidiomycota|c__Agaricomycetes|o__Russulales|f__Russulaceae|g__Lactarius	0	0	0	0	0	0	0	0	0	0	0	0	0	0	0	0	0	0	0	0	0	0	0	0	0	0.00513	0	0	0	0	0	0	0	0	0	0	0	0	0	0	0	0	0	0	0	0	0	0	0
d__Fungi|p__Basidiomycota|c__Agaricomycetes|o__Russulales|f__Russulaceae|g__Lactarius|s__Lactarius_unclassified	0	0	0	0	0	0	0	0	0	0	0	0	0	0	0	0	0	0	0	0	0	0	0	0	0	0.00513	0	0	0	0	0	0	0	0	0	0	0	0	0	0	0	0	0	0	0	0	0	0	0
d__Fungi|p__Basidiomycota|c__Agaricomycetes|o__Russulales|f__Russulaceae|g__Russula	0	0	0	0	0	0	0	0	0	0	0	0	0	0	0	0	0	0	0	0	0	0	0	0	0.02835	0.02566	0	0	0	0	0	0	0	0	0	0	0	0	0	0	0	0	0	0	0	0	0.0037	0	0
d__Fungi|p__Basidiomycota|c__Agaricomycetes|o__Russulales|f__Russulaceae|g__Russula|s__Russula_densifolia	0	0	0	0	0	0	0	0	0	0	0	0	0	0	0	0	0	0	0	0	0	0	0	0	0.02465	0.02181	0	0	0	0	0	0	0	0	0	0	0	0	0	0	0	0	0	0	0	0	0	0	0
d__Fungi|p__Basidiomycota|c__Agaricomycetes|o__Russulales|f__Russulaceae|g__Russula|s__Russula_romellii	0	0	0	0	0	0	0	0	0	0	0	0	0	0	0	0	0	0	0	0	0	0	0	0	0	0	0	0	0	0	0	0	0	0	0	0	0	0	0	0	0	0	0	0	0	0	0	0	0
d__Fungi|p__Basidiomycota|c__Agaricomycetes|o__Russulales|f__Russulaceae|g__Russula|s__Russula_sororia	0	0	0	0	0	0	0	0	0	0	0	0	0	0	0	0	0	0	0	0	0	0	0	0	0.0037	0.00385	0	0	0	0	0	0	0	0	0	0	0	0	0	0	0	0	0	0	0	0	0.0037	0	0
d__Fungi|p__Basidiomycota|c__Agaricomycetes|o__Russulales|f__Russulales_unclassified	0	0	0	0	0	0	0.00511	0	0	0	0	0	0	0	0	0	0	0	0	0	0	0	0	0	0	0	0	0	0	0	0	0	0	0	0	0	0	0	0	0	0	0	0	0	0	0	0	0	0
d__Fungi|p__Basidiomycota|c__Agaricomycetes|o__Russulales|f__Russulales_unclassified|g__Russulales_unclassified	0	0	0	0	0	0	0.00511	0	0	0	0	0	0	0	0	0	0	0	0	0	0	0	0	0	0	0	0	0	0	0	0	0	0	0	0	0	0	0	0	0	0	0	0	0	0	0	0	0	0
d__Fungi|p__Basidiomycota|c__Agaricomycetes|o__Russulales|f__Russulales_unclassified|g__Russulales_unclassified|s__Russulales_unclassified	0	0	0	0	0	0	0.00511	0	0	0	0	0	0	0	0	0	0	0	0	0	0	0	0	0	0	0	0	0	0	0	0	0	0	0	0	0	0	0	0	0	0	0	0	0	0	0	0	0	0
d__Fungi|p__Basidiomycota|c__Agaricomycetes|o__Sebacinales	0	0	0	0	0	0	0	0	0	0	0	0	0	0	0	0	0	0	0	0	0	0	0.00502	0	0.04683	0.00513	0	0	0	0	0	0.00478	0	0	0	0	0	0	0	0	0	0	0	0	0	0	0.00986	0	0
d__Fungi|p__Basidiomycota|c__Agaricomycetes|o__Sebacinales|f__Sebacinales_Group_A	0	0	0	0	0	0	0	0	0	0	0	0	0	0	0	0	0	0	0	0	0	0	0	0	0.00246	0	0	0	0	0	0	0.00478	0	0	0	0	0	0	0	0	0	0	0	0	0	0	0	0	0
d__Fungi|p__Basidiomycota|c__Agaricomycetes|o__Sebacinales|f__Sebacinales_Group_A|g__Sebacina	0	0	0	0	0	0	0	0	0	0	0	0	0	0	0	0	0	0	0	0	0	0	0	0	0.00246	0	0	0	0	0	0	0.00478	0	0	0	0	0	0	0	0	0	0	0	0	0	0	0	0	0
d__Fungi|p__Basidiomycota|c__Agaricomycetes|o__Sebacinales|f__Sebacinales_Group_A|g__Sebacina|s__Sebacina_incrustans	0	0	0	0	0	0	0	0	0	0	0	0	0	0	0	0	0	0	0	0	0	0	0	0	0.00246	0	0	0	0	0	0	0	0	0	0	0	0	0	0	0	0	0	0	0	0	0	0	0	0
d__Fungi|p__Basidiomycota|c__Agaricomycetes|o__Sebacinales|f__Sebacinales_Group_A|g__Sebacina|s__Sebacina_unclassified	0	0	0	0	0	0	0	0	0	0	0	0	0	0	0	0	0	0	0	0	0	0	0	0	0	0	0	0	0	0	0	0	0	0	0	0	0	0	0	0	0	0	0	0	0	0	0	0	0
d__Fungi|p__Basidiomycota|c__Agaricomycetes|o__Sebacinales|f__Sebacinales_Group_A|g__Sebacina|s__Sebacina_vermifera	0	0	0	0	0	0	0	0	0	0	0	0	0	0	0	0	0	0	0	0	0	0	0	0	0	0	0	0	0	0	0	0.00478	0	0	0	0	0	0	0	0	0	0	0	0	0	0	0	0	0
d__Fungi|p__Basidiomycota|c__Agaricomycetes|o__Sebacinales|f__Sebacinales_Group_B	0	0	0	0	0	0	0	0	0	0	0	0	0	0	0	0	0	0	0	0	0	0	0	0	0.04437	0	0	0	0	0	0	0	0	0	0	0	0	0	0	0	0	0	0	0	0	0	0.00986	0	0
d__Fungi|p__Basidiomycota|c__Agaricomycetes|o__Sebacinales|f__Sebacinales_Group_B|g__Serendipita	0	0	0	0	0	0	0	0	0	0	0	0	0	0	0	0	0	0	0	0	0	0	0	0	0.04437	0	0	0	0	0	0	0	0	0	0	0	0	0	0	0	0	0	0	0	0	0	0.00986	0	0
d__Fungi|p__Basidiomycota|c__Agaricomycetes|o__Sebacinales|f__Sebacinales_Group_B|g__Serendipita|s__Serendipita_vermifera	0	0	0	0	0	0	0	0	0	0	0	0	0	0	0	0	0	0	0	0	0	0	0	0	0.04437	0	0	0	0	0	0	0	0	0	0	0	0	0	0	0	0	0	0	0	0	0	0.00986	0	0
d__Fungi|p__Basidiomycota|c__Agaricomycetes|o__Sebacinales|f__Sebacinales_unclassified	0	0	0	0	0	0	0	0	0	0	0	0	0	0	0	0	0	0	0	0	0	0	0.00502	0	0	0	0	0	0	0	0	0	0	0	0	0	0	0	0	0	0	0	0	0	0	0	0	0	0
d__Fungi|p__Basidiomycota|c__Agaricomycetes|o__Sebacinales|f__Sebacinales_unclassified|g__Sebacinales_unclassified	0	0	0	0	0	0	0	0	0	0	0	0	0	0	0	0	0	0	0	0	0	0	0.00502	0	0	0	0	0	0	0	0	0	0	0	0	0	0	0	0	0	0	0	0	0	0	0	0	0	0
d__Fungi|p__Basidiomycota|c__Agaricomycetes|o__Sebacinales|f__Sebacinales_unclassified|g__Sebacinales_unclassified|s__Sebacinales_unclassified	0	0	0	0	0	0	0	0	0	0	0	0	0	0	0	0	0	0	0	0	0	0	0.00502	0	0	0	0	0	0	0	0	0	0	0	0	0	0	0	0	0	0	0	0	0	0	0	0	0	0
d__Fungi|p__Basidiomycota|c__Agaricomycetes|o__Sebacinales|f__Serendipitaceae	0	0	0	0	0	0	0	0	0	0	0	0	0	0	0	0	0	0	0	0	0	0	0	0	0	0.00513	0	0	0	0	0	0	0	0	0	0	0	0	0	0	0	0	0	0	0	0	0	0	0
d__Fungi|p__Basidiomycota|c__Agaricomycetes|o__Sebacinales|f__Serendipitaceae|g__Serendipita	0	0	0	0	0	0	0	0	0	0	0	0	0	0	0	0	0	0	0	0	0	0	0	0	0	0.00513	0	0	0	0	0	0	0	0	0	0	0	0	0	0	0	0	0	0	0	0	0	0	0
d__Fungi|p__Basidiomycota|c__Agaricomycetes|o__Sebacinales|f__Serendipitaceae|g__Serendipita|s__Serendipita_indica	0	0	0	0	0	0	0	0	0	0	0	0	0	0	0	0	0	0	0	0	0	0	0	0	0	0.00513	0	0	0	0	0	0	0	0	0	0	0	0	0	0	0	0	0	0	0	0	0	0	0
d__Fungi|p__Basidiomycota|c__Agaricomycetes|o__Thelephorales	0	0	0	0	0	0	0	0	0	0	0	0	0	0	0	0	0	0	0	0	0	16.354	0	0	0.01971	0.0077	0	0	0	0	0	0	0	0	0	0	0	0	0	0	0	0	0	0	0	0	0	0	0
d__Fungi|p__Basidiomycota|c__Agaricomycetes|o__Thelephorales|f__Thelephoraceae	0	0	0	0	0	0	0	0	0	0	0	0	0	0	0	0	0	0	0	0	0	16.354	0	0	0.01971	0.0077	0	0	0	0	0	0	0	0	0	0	0	0	0	0	0	0	0	0	0	0	0	0	0
d__Fungi|p__Basidiomycota|c__Agaricomycetes|o__Thelephorales|f__Thelephoraceae|g__Thelephoraceae_unclassified	0	0	0	0	0	0	0	0	0	0	0	0	0	0	0	0	0	0	0	0	0	15.4966	0	0	0	0	0	0	0	0	0	0	0	0	0	0	0	0	0	0	0	0	0	0	0	0	0	0	0
d__Fungi|p__Basidiomycota|c__Agaricomycetes|o__Thelephorales|f__Thelephoraceae|g__Thelephoraceae_unclassified|s__Thelephoraceae_unclassified	0	0	0	0	0	0	0	0	0	0	0	0	0	0	0	0	0	0	0	0	0	15.4966	0	0	0	0	0	0	0	0	0	0	0	0	0	0	0	0	0	0	0	0	0	0	0	0	0	0	0
d__Fungi|p__Basidiomycota|c__Agaricomycetes|o__Thelephorales|f__Thelephoraceae|g__Tomentella	0	0	0	0	0	0	0	0	0	0	0	0	0	0	0	0	0	0	0	0	0	0.85734	0	0	0.01971	0.0077	0	0	0	0	0	0	0	0	0	0	0	0	0	0	0	0	0	0	0	0	0	0	0
d__Fungi|p__Basidiomycota|c__Agaricomycetes|o__Thelephorales|f__Thelephoraceae|g__Tomentella|s__Tomentella_hjortstamiana	0	0	0	0	0	0	0	0	0	0	0	0	0	0	0	0	0	0	0	0	0	0	0	0	0.01725	0.00513	0	0	0	0	0	0	0	0	0	0	0	0	0	0	0	0	0	0	0	0	0	0	0
d__Fungi|p__Basidiomycota|c__Agaricomycetes|o__Thelephorales|f__Thelephoraceae|g__Tomentella|s__Tomentella_unclassified	0	0	0	0	0	0	0	0	0	0	0	0	0	0	0	0	0	0	0	0	0	0.85734	0	0	0.00246	0.00257	0	0	0	0	0	0	0	0	0	0	0	0	0	0	0	0	0	0	0	0	0	0	0
d__Fungi|p__Basidiomycota|c__Agaricomycetes|o__Trechisporales	0	0	0	0	0	0	0	0	0	0	0	0	0	0	0	0	0	0	0	0	0	0	0	0	0.00863	0	0	0	0	0	0	0	0	0	0	0	0	0	0	0	0	0	0	0	0	0	0.06164	0	0
d__Fungi|p__Basidiomycota|c__Agaricomycetes|o__Trechisporales|f__Hydnodontaceae	0	0	0	0	0	0	0	0	0	0	0	0	0	0	0	0	0	0	0	0	0	0	0	0	0	0	0	0	0	0	0	0	0	0	0	0	0	0	0	0	0	0	0	0	0	0	0.06164	0	0
d__Fungi|p__Basidiomycota|c__Agaricomycetes|o__Trechisporales|f__Hydnodontaceae|g__Trechispora	0	0	0	0	0	0	0	0	0	0	0	0	0	0	0	0	0	0	0	0	0	0	0	0	0	0	0	0	0	0	0	0	0	0	0	0	0	0	0	0	0	0	0	0	0	0	0.06164	0	0
d__Fungi|p__Basidiomycota|c__Agaricomycetes|o__Trechisporales|f__Hydnodontaceae|g__Trechispora|s__Trechispora_unclassified	0	0	0	0	0	0	0	0	0	0	0	0	0	0	0	0	0	0	0	0	0	0	0	0	0	0	0	0	0	0	0	0	0	0	0	0	0	0	0	0	0	0	0	0	0	0	0.06164	0	0
d__Fungi|p__Basidiomycota|c__Agaricomycetes|o__Trechisporales|f__Trechisporales_unclassified	0	0	0	0	0	0	0	0	0	0	0	0	0	0	0	0	0	0	0	0	0	0	0	0	0.00863	0	0	0	0	0	0	0	0	0	0	0	0	0	0	0	0	0	0	0	0	0	0	0	0
d__Fungi|p__Basidiomycota|c__Agaricomycetes|o__Trechisporales|f__Trechisporales_unclassified|g__Trechisporales_unclassified	0	0	0	0	0	0	0	0	0	0	0	0	0	0	0	0	0	0	0	0	0	0	0	0	0.00863	0	0	0	0	0	0	0	0	0	0	0	0	0	0	0	0	0	0	0	0	0	0	0	0
d__Fungi|p__Basidiomycota|c__Agaricomycetes|o__Trechisporales|f__Trechisporales_unclassified|g__Trechisporales_unclassified|s__Trechisporales_unclassified	0	0	0	0	0	0	0	0	0	0	0	0	0	0	0	0	0	0	0	0	0	0	0	0	0.00863	0	0	0	0	0	0	0	0	0	0	0	0	0	0	0	0	0	0	0	0	0	0	0	0
d__Fungi|p__Basidiomycota|c__Agaricostilbomycetes	0	0	0.01038	0.03165	36.6463	0	0	0	0	0	0	0	0.00803	0	0	0	0	0	0	0	0	0	0	0	0	0	0	0	0	0	0	0	0	0	0	0	0	0	0	0	0	0	0	0	0	0	0	0	0
d__Fungi|p__Basidiomycota|c__Agaricostilbomycetes|o__Agaricostilbales	0	0	0.01038	0.03165	36.6463	0	0	0	0	0	0	0	0.00803	0	0	0	0	0	0	0	0	0	0	0	0	0	0	0	0	0	0	0	0	0	0	0	0	0	0	0	0	0	0	0	0	0	0	0	0
d__Fungi|p__Basidiomycota|c__Agaricostilbomycetes|o__Agaricostilbales|f__Agaricostilbaceae	0	0	0.01038	0.03165	36.6463	0	0	0	0	0	0	0	0.00803	0	0	0	0	0	0	0	0	0	0	0	0	0	0	0	0	0	0	0	0	0	0	0	0	0	0	0	0	0	0	0	0	0	0	0	0
d__Fungi|p__Basidiomycota|c__Agaricostilbomycetes|o__Agaricostilbales|f__Agaricostilbaceae|g__Agaricostilbaceae_unclassified	0	0	0	0	0.00512	0	0	0	0	0	0	0	0	0	0	0	0	0	0	0	0	0	0	0	0	0	0	0	0	0	0	0	0	0	0	0	0	0	0	0	0	0	0	0	0	0	0	0	0
d__Fungi|p__Basidiomycota|c__Agaricostilbomycetes|o__Agaricostilbales|f__Agaricostilbaceae|g__Agaricostilbaceae_unclassified|s__Agaricostilbaceae_unclassified	0	0	0	0	0.00512	0	0	0	0	0	0	0	0	0	0	0	0	0	0	0	0	0	0	0	0	0	0	0	0	0	0	0	0	0	0	0	0	0	0	0	0	0	0	0	0	0	0	0	0
d__Fungi|p__Basidiomycota|c__Agaricostilbomycetes|o__Agaricostilbales|f__Agaricostilbaceae|g__Bensingtonia	0	0	0.01038	0.03165	36.6412	0	0	0	0	0	0	0	0.00803	0	0	0	0	0	0	0	0	0	0	0	0	0	0	0	0	0	0	0	0	0	0	0	0	0	0	0	0	0	0	0	0	0	0	0	0
d__Fungi|p__Basidiomycota|c__Agaricostilbomycetes|o__Agaricostilbales|f__Agaricostilbaceae|g__Bensingtonia|s__Bensingtonia_unclassified	0	0	0.01038	0.03165	36.6412	0	0	0	0	0	0	0	0.00803	0	0	0	0	0	0	0	0	0	0	0	0	0	0	0	0	0	0	0	0	0	0	0	0	0	0	0	0	0	0	0	0	0	0	0	0
d__Fungi|p__Basidiomycota|c__Basidiomycota_unclassified	0	0	0	0	0	0	0	0	0	0	0	0	0	0	0	0	0	0	0.00377	0	0	17.7163	0	0	0	0	0	0	0	0	0	0	0	0	0	0	0	0	0	0	0	0	0	0	0	0	0.1874	0	0
d__Fungi|p__Basidiomycota|c__Basidiomycota_unclassified|o__Basidiomycota_unclassified	0	0	0	0	0	0	0	0	0	0	0	0	0	0	0	0	0	0	0.00377	0	0	17.7163	0	0	0	0	0	0	0	0	0	0	0	0	0	0	0	0	0	0	0	0	0	0	0	0	0.1874	0	0
d__Fungi|p__Basidiomycota|c__Basidiomycota_unclassified|o__Basidiomycota_unclassified|f__Basidiomycota_unclassified	0	0	0	0	0	0	0	0	0	0	0	0	0	0	0	0	0	0	0.00377	0	0	17.7163	0	0	0	0	0	0	0	0	0	0	0	0	0	0	0	0	0	0	0	0	0	0	0	0	0.1874	0	0
d__Fungi|p__Basidiomycota|c__Basidiomycota_unclassified|o__Basidiomycota_unclassified|f__Basidiomycota_unclassified|g__Basidiomycota_unclassified	0	0	0	0	0	0	0	0	0	0	0	0	0	0	0	0	0	0	0.00377	0	0	17.7163	0	0	0	0	0	0	0	0	0	0	0	0	0	0	0	0	0	0	0	0	0	0	0	0	0.1874	0	0
d__Fungi|p__Basidiomycota|c__Basidiomycota_unclassified|o__Basidiomycota_unclassified|f__Basidiomycota_unclassified|g__Basidiomycota_unclassified|s__Basidiomycota_unclassified	0	0	0	0	0	0	0	0	0	0	0	0	0	0	0	0	0	0	0.00377	0	0	17.7163	0	0	0	0	0	0	0	0	0	0	0	0	0	0	0	0	0	0	0	0	0	0	0	0	0.1874	0	0
d__Fungi|p__Basidiomycota|c__Cystobasidiomycetes	0	0	0	0	0	0	0	0	0	0	0	0	0	0	0	0	0	0	0	0	0	0	0	0	0.00986	0.02052	0	0	0	0	0	0	0	0	0	0	0	0	0	0	0	0	0	0	0	0	0.00986	0	0
d__Fungi|p__Basidiomycota|c__Cystobasidiomycetes|o__Erythrobasidiales	0	0	0	0	0	0	0	0	0	0	0	0	0	0	0	0	0	0	0	0	0	0	0	0	0.00986	0.02052	0	0	0	0	0	0	0	0	0	0	0	0	0	0	0	0	0	0	0	0	0.00986	0	0
d__Fungi|p__Basidiomycota|c__Cystobasidiomycetes|o__Erythrobasidiales|f__Erythrobasidiaceae	0	0	0	0	0	0	0	0	0	0	0	0	0	0	0	0	0	0	0	0	0	0	0	0	0	0	0	0	0	0	0	0	0	0	0	0	0	0	0	0	0	0	0	0	0	0	0.0037	0	0
d__Fungi|p__Basidiomycota|c__Cystobasidiomycetes|o__Erythrobasidiales|f__Erythrobasidiaceae|g__Erythrobasidium	0	0	0	0	0	0	0	0	0	0	0	0	0	0	0	0	0	0	0	0	0	0	0	0	0	0	0	0	0	0	0	0	0	0	0	0	0	0	0	0	0	0	0	0	0	0	0.0037	0	0
d__Fungi|p__Basidiomycota|c__Cystobasidiomycetes|o__Erythrobasidiales|f__Erythrobasidiaceae|g__Erythrobasidium|s__Erythrobasidium_unclassified	0	0	0	0	0	0	0	0	0	0	0	0	0	0	0	0	0	0	0	0	0	0	0	0	0	0	0	0	0	0	0	0	0	0	0	0	0	0	0	0	0	0	0	0	0	0	0.0037	0	0
d__Fungi|p__Basidiomycota|c__Cystobasidiomycetes|o__Erythrobasidiales|f__Erythrobasidiales_Incertae_sedis	0	0	0	0	0	0	0	0	0	0	0	0	0	0	0	0	0	0	0	0	0	0	0	0	0.00986	0.02052	0	0	0	0	0	0	0	0	0	0	0	0	0	0	0	0	0	0	0	0	0.00616	0	0
d__Fungi|p__Basidiomycota|c__Cystobasidiomycetes|o__Erythrobasidiales|f__Erythrobasidiales_Incertae_sedis|g__Erythrobasidium	0	0	0	0	0	0	0	0	0	0	0	0	0	0	0	0	0	0	0	0	0	0	0	0	0.00986	0.02052	0	0	0	0	0	0	0	0	0	0	0	0	0	0	0	0	0	0	0	0	0.00616	0	0
d__Fungi|p__Basidiomycota|c__Cystobasidiomycetes|o__Erythrobasidiales|f__Erythrobasidiales_Incertae_sedis|g__Erythrobasidium|s__Sporobolomyces_yunnanensis	0	0	0	0	0	0	0	0	0	0	0	0	0	0	0	0	0	0	0	0	0	0	0	0	0.00986	0.02052	0	0	0	0	0	0	0	0	0	0	0	0	0	0	0	0	0	0	0	0	0.00616	0	0
d__Fungi|p__Basidiomycota|c__Exobasidiomycetes	0	0	0	0	0	0	0	0	0	0	0	0	0	0	0	0	0	0	0	0	0	0	0	0	0	0	0	0	0	0	0	0	0	0	0	0	0	0.56184	0	0	0	0	0	0	0	0	0	0	0
d__Fungi|p__Basidiomycota|c__Exobasidiomycetes|o__Exobasidiomycetidae_Incertae_sedis	0	0	0	0	0	0	0	0	0	0	0	0	0	0	0	0	0	0	0	0	0	0	0	0	0	0	0	0	0	0	0	0	0	0	0	0	0	0.56184	0	0	0	0	0	0	0	0	0	0	0
d__Fungi|p__Basidiomycota|c__Exobasidiomycetes|o__Exobasidiomycetidae_Incertae_sedis|f__Exobasidiomycetidae_Incertae_sedis	0	0	0	0	0	0	0	0	0	0	0	0	0	0	0	0	0	0	0	0	0	0	0	0	0	0	0	0	0	0	0	0	0	0	0	0	0	0.56184	0	0	0	0	0	0	0	0	0	0	0
d__Fungi|p__Basidiomycota|c__Exobasidiomycetes|o__Exobasidiomycetidae_Incertae_sedis|f__Exobasidiomycetidae_Incertae_sedis|g__Meira	0	0	0	0	0	0	0	0	0	0	0	0	0	0	0	0	0	0	0	0	0	0	0	0	0	0	0	0	0	0	0	0	0	0	0	0	0	0.56184	0	0	0	0	0	0	0	0	0	0	0
d__Fungi|p__Basidiomycota|c__Exobasidiomycetes|o__Exobasidiomycetidae_Incertae_sedis|f__Exobasidiomycetidae_Incertae_sedis|g__Meira|s__Meira_argovae	0	0	0	0	0	0	0	0	0	0	0	0	0	0	0	0	0	0	0	0	0	0	0	0	0	0	0	0	0	0	0	0	0	0	0	0	0	0.56184	0	0	0	0	0	0	0	0	0	0	0
d__Fungi|p__Basidiomycota|c__Exobasidiomycetes|o__Exobasidiomycetidae_Incertae_sedis|f__Exobasidiomycetidae_Incertae_sedis|g__Tilletiopsis	0	0	0	0	0	0	0	0	0	0	0	0	0	0	0	0	0	0	0	0	0	0	0	0	0	0	0	0	0	0	0	0	0	0	0	0	0	0	0	0	0	0	0	0	0	0	0	0	0
d__Fungi|p__Basidiomycota|c__Exobasidiomycetes|o__Exobasidiomycetidae_Incertae_sedis|f__Exobasidiomycetidae_Incertae_sedis|g__Tilletiopsis|s__Tilletiopsis_albescens	0	0	0	0	0	0	0	0	0	0	0	0	0	0	0	0	0	0	0	0	0	0	0	0	0	0	0	0	0	0	0	0	0	0	0	0	0	0	0	0	0	0	0	0	0	0	0	0	0
d__Fungi|p__Basidiomycota|c__Geminibasidiomycetes	0	0	0	0	0	0	0	0	0	0	0	0	0	0	0	0	0	0	0	0	0	0	0	0	0	0	0	0	0	0	0	0	0	0	0	0	0	0	0	0	0	0	0	0	0	0	0	0	0
d__Fungi|p__Basidiomycota|c__Geminibasidiomycetes|o__Geminibasidiales	0	0	0	0	0	0	0	0	0	0	0	0	0	0	0	0	0	0	0	0	0	0	0	0	0	0	0	0	0	0	0	0	0	0	0	0	0	0	0	0	0	0	0	0	0	0	0	0	0
d__Fungi|p__Basidiomycota|c__Geminibasidiomycetes|o__Geminibasidiales|f__Geminibasidiaceae	0	0	0	0	0	0	0	0	0	0	0	0	0	0	0	0	0	0	0	0	0	0	0	0	0	0	0	0	0	0	0	0	0	0	0	0	0	0	0	0	0	0	0	0	0	0	0	0	0
d__Fungi|p__Basidiomycota|c__Geminibasidiomycetes|o__Geminibasidiales|f__Geminibasidiaceae|g__Geminibasidium	0	0	0	0	0	0	0	0	0	0	0	0	0	0	0	0	0	0	0	0	0	0	0	0	0	0	0	0	0	0	0	0	0	0	0	0	0	0	0	0	0	0	0	0	0	0	0	0	0
d__Fungi|p__Basidiomycota|c__Geminibasidiomycetes|o__Geminibasidiales|f__Geminibasidiaceae|g__Geminibasidium|s__Geminibasidium_unclassified	0	0	0	0	0	0	0	0	0	0	0	0	0	0	0	0	0	0	0	0	0	0	0	0	0	0	0	0	0	0	0	0	0	0	0	0	0	0	0	0	0	0	0	0	0	0	0	0	0
d__Fungi|p__Basidiomycota|c__Microbotryomycetes	0	0.00858	0	0	0	0.00456	0	0	0	0	0	0	0	0	0	0	0	0	0	0	0	0	0	0.0213	0.02095	0.00898	0	0	0.02112	0	0	0.07773	0	0.68056	0	0	0.00457	0	0.00415	0	0	0	0	0	0.00249	0	0.0074	0	0
d__Fungi|p__Basidiomycota|c__Microbotryomycetes|o__Leucosporidiales	0	0	0	0	0	0	0	0	0	0	0	0	0	0	0	0	0	0	0	0	0	0	0	0	0	0	0	0	0	0	0	0	0	0	0	0	0	0	0	0	0	0	0	0	0	0	0.00493	0	0
d__Fungi|p__Basidiomycota|c__Microbotryomycetes|o__Leucosporidiales|f__Leucosporidiaceae	0	0	0	0	0	0	0	0	0	0	0	0	0	0	0	0	0	0	0	0	0	0	0	0	0	0	0	0	0	0	0	0	0	0	0	0	0	0	0	0	0	0	0	0	0	0	0.00493	0	0
d__Fungi|p__Basidiomycota|c__Microbotryomycetes|o__Leucosporidiales|f__Leucosporidiaceae|g__Mastigobasidium	0	0	0	0	0	0	0	0	0	0	0	0	0	0	0	0	0	0	0	0	0	0	0	0	0	0	0	0	0	0	0	0	0	0	0	0	0	0	0	0	0	0	0	0	0	0	0.00493	0	0
d__Fungi|p__Basidiomycota|c__Microbotryomycetes|o__Leucosporidiales|f__Leucosporidiaceae|g__Mastigobasidium|s__Mastigobasidium_intermedium	0	0	0	0	0	0	0	0	0	0	0	0	0	0	0	0	0	0	0	0	0	0	0	0	0	0	0	0	0	0	0	0	0	0	0	0	0	0	0	0	0	0	0	0	0	0	0.00493	0	0
d__Fungi|p__Basidiomycota|c__Microbotryomycetes|o__Sporidiobolales	0	0.00858	0	0	0	0.00456	0	0	0	0	0	0	0	0	0	0	0	0	0	0	0	0	0	0.0213	0.02095	0.00898	0	0	0.02112	0	0	0.07773	0	0.68056	0	0	0.00457	0	0.00415	0	0	0	0	0	0.00249	0	0.00247	0	0
d__Fungi|p__Basidiomycota|c__Microbotryomycetes|o__Sporidiobolales|f__Sporidiobolaceae	0	0.00858	0	0	0	0	0	0	0	0	0	0	0	0	0	0	0	0	0	0	0	0	0	0	0	0	0	0	0	0	0	0	0	0.68056	0	0	0	0	0	0	0	0	0	0	0	0	0	0	0
d__Fungi|p__Basidiomycota|c__Microbotryomycetes|o__Sporidiobolales|f__Sporidiobolaceae|g__Sporidiobolus	0	0.00858	0	0	0	0	0	0	0	0	0	0	0	0	0	0	0	0	0	0	0	0	0	0	0	0	0	0	0	0	0	0	0	0.68056	0	0	0	0	0	0	0	0	0	0	0	0	0	0	0
d__Fungi|p__Basidiomycota|c__Microbotryomycetes|o__Sporidiobolales|f__Sporidiobolaceae|g__Sporidiobolus|s__Sporidiobolus_pararoseus	0	0.00858	0	0	0	0	0	0	0	0	0	0	0	0	0	0	0	0	0	0	0	0	0	0	0	0	0	0	0	0	0	0	0	0.68056	0	0	0	0	0	0	0	0	0	0	0	0	0	0	0
d__Fungi|p__Basidiomycota|c__Microbotryomycetes|o__Sporidiobolales|f__Sporidiobolales_Incertae_sedis	0	0	0	0	0	0.00456	0	0	0	0	0	0	0	0	0	0	0	0	0	0	0	0	0	0.0213	0.02095	0.00898	0	0	0.02112	0	0	0.07773	0	0	0	0	0.00457	0	0.00415	0	0	0	0	0	0.00249	0	0.00247	0	0
d__Fungi|p__Basidiomycota|c__Microbotryomycetes|o__Sporidiobolales|f__Sporidiobolales_Incertae_sedis|g__Rhodotorula	0	0	0	0	0	0.00456	0	0	0	0	0	0	0	0	0	0	0	0	0	0	0	0	0	0.0213	0	0.00385	0	0	0.02112	0	0	0.07773	0	0	0	0	0.00457	0	0.00415	0	0	0	0	0	0.00249	0	0	0	0
d__Fungi|p__Basidiomycota|c__Microbotryomycetes|o__Sporidiobolales|f__Sporidiobolales_Incertae_sedis|g__Rhodotorula|s__Rhodotorula_aurantiaca	0	0	0	0	0	0	0	0	0	0	0	0	0	0	0	0	0	0	0	0	0	0	0	0	0	0.00385	0	0	0	0	0	0	0	0	0	0	0	0	0	0	0	0	0	0	0	0	0	0	0
d__Fungi|p__Basidiomycota|c__Microbotryomycetes|o__Sporidiobolales|f__Sporidiobolales_Incertae_sedis|g__Rhodotorula|s__Rhodotorula_ingeniosa	0	0	0	0	0	0.00456	0	0	0	0	0	0	0	0	0	0	0	0	0	0	0	0	0	0.0213	0	0	0	0	0.02112	0	0	0.07773	0	0	0	0	0.00457	0	0.00415	0	0	0	0	0	0.00249	0	0	0	0
d__Fungi|p__Basidiomycota|c__Microbotryomycetes|o__Sporidiobolales|f__Sporidiobolales_Incertae_sedis|g__Sporobolomyces	0	0	0	0	0	0	0	0	0	0	0	0	0	0	0	0	0	0	0	0	0	0	0	0	0.02095	0.00513	0	0	0	0	0	0	0	0	0	0	0	0	0	0	0	0	0	0	0	0	0.00247	0	0
d__Fungi|p__Basidiomycota|c__Microbotryomycetes|o__Sporidiobolales|f__Sporidiobolales_Incertae_sedis|g__Sporobolomyces|s__Rhodotorula_marina	0	0	0	0	0	0	0	0	0	0	0	0	0	0	0	0	0	0	0	0	0	0	0	0	0.00863	0.00513	0	0	0	0	0	0	0	0	0	0	0	0	0	0	0	0	0	0	0	0	0.00247	0	0
d__Fungi|p__Basidiomycota|c__Microbotryomycetes|o__Sporidiobolales|f__Sporidiobolales_Incertae_sedis|g__Sporobolomyces|s__Sporobolomyces_gracilis	0	0	0	0	0	0	0	0	0	0	0	0	0	0	0	0	0	0	0	0	0	0	0	0	0.01232	0	0	0	0	0	0	0	0	0	0	0	0	0	0	0	0	0	0	0	0	0	0	0	0
d__Fungi|p__Basidiomycota|c__Pucciniomycetes	0	0	0	0	0	0	0	0	0	0	0	0	0	0	0	0	0	0	0	0	0	0	0	0	0	0	0	0	0	0	0	0.00598	0	0	0	0	0	0	0	0	0	0	0	0	0	0	0	0	0
d__Fungi|p__Basidiomycota|c__Pucciniomycetes|o__Pucciniales	0	0	0	0	0	0	0	0	0	0	0	0	0	0	0	0	0	0	0	0	0	0	0	0	0	0	0	0	0	0	0	0.00598	0	0	0	0	0	0	0	0	0	0	0	0	0	0	0	0	0
d__Fungi|p__Basidiomycota|c__Pucciniomycetes|o__Pucciniales|f__Pucciniaceae	0	0	0	0	0	0	0	0	0	0	0	0	0	0	0	0	0	0	0	0	0	0	0	0	0	0	0	0	0	0	0	0.00598	0	0	0	0	0	0	0	0	0	0	0	0	0	0	0	0	0
d__Fungi|p__Basidiomycota|c__Pucciniomycetes|o__Pucciniales|f__Pucciniaceae|g__Puccinia	0	0	0	0	0	0	0	0	0	0	0	0	0	0	0	0	0	0	0	0	0	0	0	0	0	0	0	0	0	0	0	0.00598	0	0	0	0	0	0	0	0	0	0	0	0	0	0	0	0	0
d__Fungi|p__Basidiomycota|c__Pucciniomycetes|o__Pucciniales|f__Pucciniaceae|g__Puccinia|s__Puccinia_andropogonis	0	0	0	0	0	0	0	0	0	0	0	0	0	0	0	0	0	0	0	0	0	0	0	0	0	0	0	0	0	0	0	0.00598	0	0	0	0	0	0	0	0	0	0	0	0	0	0	0	0	0
d__Fungi|p__Basidiomycota|c__Tremellomycetes	9.13034	4.08836	0	0	0	0.2917	0.01788	0	0	0	0	0.0623	0	0.00267	0.00496	0.12765	0	8.7727	0.01004	17.6413	0	20.8785	0.24117	0.33129	15.2884	2.8592	0.00239	1.56061	9.28038	0	0	0.116	2.80539	0	0.04244	0.11479	0.36236	0	0.42211	0.4446	2.08603	0.00248	1.54371	0.78893	2.37119	0	2.99097	0	0
d__Fungi|p__Basidiomycota|c__Tremellomycetes|o__Cystofilobasidiales	9.13034	0	0	0	0	0	0	0	0	0	0	0	0	0	0	0.12765	0	0	0	0	0	0	0	0.00473	0	0.0077	0	0	9.1893	0	0	0	0	0	0	0	0.36236	0	0	0	0	0	0	0	0	0	2.53603	0	0
d__Fungi|p__Basidiomycota|c__Tremellomycetes|o__Cystofilobasidiales|f__Cystofilobasidiaceae	9.13034	0	0	0	0	0	0	0	0	0	0	0	0	0	0	0.12765	0	0	0	0	0	0	0	0.00473	0	0.0077	0	0	9.1893	0	0	0	0	0	0	0	0.36236	0	0	0	0	0	0	0	0	0	2.53603	0	0
d__Fungi|p__Basidiomycota|c__Tremellomycetes|o__Cystofilobasidiales|f__Cystofilobasidiaceae|g__Guehomyces	0	0	0	0	0	0	0	0	0	0	0	0	0	0	0	0	0	0	0	0	0	0	0	0	0	0.0077	0	0	0	0	0	0	0	0	0	0	0	0	0	0	0	0	0	0	0	0	2.52	0	0
d__Fungi|p__Basidiomycota|c__Tremellomycetes|o__Cystofilobasidiales|f__Cystofilobasidiaceae|g__Guehomyces|s__Guehomyces_pullulans	0	0	0	0	0	0	0	0	0	0	0	0	0	0	0	0	0	0	0	0	0	0	0	0	0	0.0077	0	0	0	0	0	0	0	0	0	0	0	0	0	0	0	0	0	0	0	0	2.52	0	0
d__Fungi|p__Basidiomycota|c__Tremellomycetes|o__Cystofilobasidiales|f__Cystofilobasidiaceae|g__Mrakia	0	0	0	0	0	0	0	0	0	0	0	0	0	0	0	0	0	0	0	0	0	0	0	0	0	0	0	0	0	0	0	0	0	0	0	0	0	0	0	0	0	0	0	0	0	0	0.01603	0	0
d__Fungi|p__Basidiomycota|c__Tremellomycetes|o__Cystofilobasidiales|f__Cystofilobasidiaceae|g__Mrakia|s__Mrakia_unclassified	0	0	0	0	0	0	0	0	0	0	0	0	0	0	0	0	0	0	0	0	0	0	0	0	0	0	0	0	0	0	0	0	0	0	0	0	0	0	0	0	0	0	0	0	0	0	0.01603	0	0
d__Fungi|p__Basidiomycota|c__Tremellomycetes|o__Cystofilobasidiales|f__Cystofilobasidiaceae|g__Udeniomyces	9.13034	0	0	0	0	0	0	0	0	0	0	0	0	0	0	0.12765	0	0	0	0	0	0	0	0.00473	0	0	0	0	9.1893	0	0	0	0	0	0	0	0.36236	0	0	0	0	0	0	0	0	0	0	0	0
d__Fungi|p__Basidiomycota|c__Tremellomycetes|o__Cystofilobasidiales|f__Cystofilobasidiaceae|g__Udeniomyces|s__Udeniomyces_megalosporus	1.93674	0	0	0	0	0	0	0	0	0	0	0	0	0	0	0.12765	0	0	0	0	0	0	0	0.00473	0	0	0	0	9.18402	0	0	0	0	0	0	0	0.01066	0	0	0	0	0	0	0	0	0	0	0	0
d__Fungi|p__Basidiomycota|c__Tremellomycetes|o__Cystofilobasidiales|f__Cystofilobasidiaceae|g__Udeniomyces|s__Udeniomyces_pyricola	7.1936	0	0	0	0	0	0	0	0	0	0	0	0	0	0	0	0	0	0	0	0	0	0	0	0	0	0	0	0.00528	0	0	0	0	0	0	0	0.3517	0	0	0	0	0	0	0	0	0	0	0	0
d__Fungi|p__Basidiomycota|c__Tremellomycetes|o__Tremellales	0	0.00368	0	0	0	0	0.00511	0	0	0	0	0.0623	0	0.00267	0.00496	0	0	8.7727	0.01004	17.6413	0	20.8785	0.00502	0.16091	0.09736	0.07825	0.00239	1.56061	0.08184	0	0	0.10285	2.80539	0	0.04244	0	0	0	0	0.43376	2.08603	0.00248	1.54371	0.78893	2.36122	0	0.29466	0	0
d__Fungi|p__Basidiomycota|c__Tremellomycetes|o__Tremellales|f__Tremellaceae	0	0.00368	0	0	0	0	0.00511	0	0	0	0	0.0623	0	0.00267	0.00496	0	0	8.7727	0.01004	17.6413	0	20.8785	0	0.16091	0.01848	0.03848	0.00239	1.56061	0.08184	0	0	0.10285	2.80539	0	0.03994	0	0	0	0	0.43376	2.08603	0.00248	1.54124	0	0	0	0.2774	0	0
d__Fungi|p__Basidiomycota|c__Tremellomycetes|o__Tremellales|f__Tremellaceae|g__Cryptococcus	0	0.00368	0	0	0	0	0.00511	0	0	0	0	0.0623	0	0.00267	0.00496	0	0	8.7727	0.01004	17.6413	0	20.8785	0	0.16091	0.01848	0.03848	0.00239	1.56061	0.08184	0	0	0.10285	2.80539	0	0.03994	0	0	0	0	0.43376	2.08603	0.00248	1.54124	0	0	0	0.2774	0	0
d__Fungi|p__Basidiomycota|c__Tremellomycetes|o__Tremellales|f__Tremellaceae|g__Cryptococcus|s__Cryptococcus_aureus	0	0	0	0	0	0	0	0	0	0	0	0	0	0	0	0	0	0	0	0	0	0	0	0	0	0	0	0	0	0	0	0	0	0	0	0	0	0	0	0	0	0	0	0	0	0	0	0	0
d__Fungi|p__Basidiomycota|c__Tremellomycetes|o__Tremellales|f__Tremellaceae|g__Cryptococcus|s__Cryptococcus_curvatus	0	0.00368	0	0	0	0	0	0	0	0	0	0	0	0	0	0	0	0	0	0	0	0	0	0	0	0.00513	0	0	0	0	0	0	0	0	0	0	0	0	0	0	0	0	0	0	0	0	0	0	0
d__Fungi|p__Basidiomycota|c__Tremellomycetes|o__Tremellales|f__Tremellaceae|g__Cryptococcus|s__Cryptococcus_dimennae	0	0	0	0	0	0	0	0	0	0	0	0	0	0	0	0	0	0	0	0	0	0	0	0	0.00616	0	0	0	0	0	0	0	0	0	0	0	0	0	0	0	0	0	0	0	0	0	0	0	0
d__Fungi|p__Basidiomycota|c__Tremellomycetes|o__Tremellales|f__Tremellaceae|g__Cryptococcus|s__Cryptococcus_festucosus	0	0	0	0	0	0	0	0	0	0	0	0	0	0	0	0	0	0	0	0	0	0	0	0	0	0	0	0	0	0	0	0	0	0	0	0	0	0	0	0	0	0	0	0	0	0	0.02959	0	0
d__Fungi|p__Basidiomycota|c__Tremellomycetes|o__Tremellales|f__Tremellaceae|g__Cryptococcus|s__Cryptococcus_magnus	0	0	0	0	0	0	0	0	0	0	0	0.0623	0	0	0	0	0	0	0.00251	17.6413	0	0	0	0	0	0	0	1.56061	0	0	0	0	0	0	0.00749	0	0	0	0	0	0	0	0.33865	0	0	0	0	0	0
d__Fungi|p__Basidiomycota|c__Tremellomycetes|o__Tremellales|f__Tremellaceae|g__Cryptococcus|s__Cryptococcus_podzolicus	0	0	0	0	0	0	0	0	0	0	0	0	0	0	0	0	0	0	0	0	0	0	0	0	0	0	0	0	0	0	0	0	0	0	0	0	0	0	0	0	0	0	0	0	0	0	0.01973	0	0
d__Fungi|p__Basidiomycota|c__Tremellomycetes|o__Tremellales|f__Tremellaceae|g__Cryptococcus|s__Cryptococcus_rajasthanensis	0	0	0	0	0	0	0.00511	0	0	0	0	0	0	0	0	0	0	0	0	0	0	0	0	0	0	0	0	0	0	0	0	0	0	0	0	0	0	0	0	0	0	0	0	0	0	0	0	0	0
d__Fungi|p__Basidiomycota|c__Tremellomycetes|o__Tremellales|f__Tremellaceae|g__Cryptococcus|s__Cryptococcus_sp_FYB_2007a	0	0	0	0	0	0	0	0	0	0	0	0	0	0	0	0	0	0	0	0	0	0	0	0	0.01232	0.03335	0	0	0	0	0	0	0	0	0	0	0	0	0	0	0	0	0	0	0	0	0	0	0
d__Fungi|p__Basidiomycota|c__Tremellomycetes|o__Tremellales|f__Tremellaceae|g__Cryptococcus|s__Cryptococcus_tephrensis	0	0	0	0	0	0	0	0	0	0	0	0	0	0	0	0	0	0	0.00502	0	0	0	0	0	0	0	0.00239	0	0	0	0	0	0.01541	0	0	0	0	0	0	0	0.01522	0	0	0	0	0	0	0	0
d__Fungi|p__Basidiomycota|c__Tremellomycetes|o__Tremellales|f__Tremellaceae|g__Cryptococcus|s__Cryptococcus_terricola	0	0	0	0	0	0	0	0	0	0	0	0	0	0	0	0	0	0	0	0	0	0	0	0	0	0	0	0	0	0	0	0	0	0	0	0	0	0	0	0	0	0	0	0	0	0	0.01356	0	0
d__Fungi|p__Basidiomycota|c__Tremellomycetes|o__Tremellales|f__Tremellaceae|g__Cryptococcus|s__Cryptococcus_unclassified	0	0	0	0	0	0	0	0	0	0	0	0	0	0.00267	0.00496	0	0	8.7727	0.00251	0	0	20.8741	0	0.16091	0	0	0	0	0.08184	0	0	0.10285	2.76429	0	0	0	0	0	0	0.43376	0	0	0.0136	0	0	0	0.21452	0	0
d__Fungi|p__Basidiomycota|c__Tremellomycetes|o__Tremellales|f__Tremellaceae|g__Cryptococcus|s__Cryptococcus_victoriae	0	0	0	0	0	0	0	0	0	0	0	0	0	0	0	0	0	0	0	0	0	0	0	0	0	0	0	0	0	0	0	0	0.02569	0	0.03245	0	0	0	0	0	2.07081	0.00248	1.18899	0	0	0	0	0	0
d__Fungi|p__Basidiomycota|c__Tremellomycetes|o__Tremellales|f__Tremellaceae|g__Cryptococcus|s__Mrakiella_aquatica	0	0	0	0	0	0	0	0	0	0	0	0	0	0	0	0	0	0	0	0	0	0.0044	0	0	0	0	0	0	0	0	0	0	0	0	0	0	0	0	0	0	0	0	0	0	0	0	0	0	0
d__Fungi|p__Basidiomycota|c__Tremellomycetes|o__Tremellales|f__Tremellales_Incertae_sedis	0	0	0	0	0	0	0	0	0	0	0	0	0	0	0	0	0	0	0	0	0	0	0	0	0	0.00257	0	0	0	0	0	0	0	0	0.0025	0	0	0	0	0	0	0	0.00247	0.78893	2.36122	0	0	0	0
d__Fungi|p__Basidiomycota|c__Tremellomycetes|o__Tremellales|f__Tremellales_Incertae_sedis|g__Bulleromyces	0	0	0	0	0	0	0	0	0	0	0	0	0	0	0	0	0	0	0	0	0	0	0	0	0	0	0	0	0	0	0	0	0	0	0	0	0	0	0	0	0	0	0	0	2.36122	0	0	0	0
d__Fungi|p__Basidiomycota|c__Tremellomycetes|o__Tremellales|f__Tremellales_Incertae_sedis|g__Bulleromyces|s__Bulleromyces_albus	0	0	0	0	0	0	0	0	0	0	0	0	0	0	0	0	0	0	0	0	0	0	0	0	0	0	0	0	0	0	0	0	0	0	0	0	0	0	0	0	0	0	0	0	2.36122	0	0	0	0
d__Fungi|p__Basidiomycota|c__Tremellomycetes|o__Tremellales|f__Tremellales_Incertae_sedis|g__Dioszegia	0	0	0	0	0	0	0	0	0	0	0	0	0	0	0	0	0	0	0	0	0	0	0	0	0	0.00257	0	0	0	0	0	0	0	0	0	0	0	0	0	0	0	0	0	0.78893	0	0	0	0	0
d__Fungi|p__Basidiomycota|c__Tremellomycetes|o__Tremellales|f__Tremellales_Incertae_sedis|g__Dioszegia|s__Dioszegia_zsoltii_var_zsoltii	0	0	0	0	0	0	0	0	0	0	0	0	0	0	0	0	0	0	0	0	0	0	0	0	0	0.00257	0	0	0	0	0	0	0	0	0	0	0	0	0	0	0	0	0	0.78893	0	0	0	0	0
d__Fungi|p__Basidiomycota|c__Tremellomycetes|o__Tremellales|f__Tremellales_Incertae_sedis|g__Tremella	0	0	0	0	0	0	0	0	0	0	0	0	0	0	0	0	0	0	0	0	0	0	0	0	0	0	0	0	0	0	0	0	0	0	0.0025	0	0	0	0	0	0	0	0.00247	0	0	0	0	0	0
d__Fungi|p__Basidiomycota|c__Tremellomycetes|o__Tremellales|f__Tremellales_Incertae_sedis|g__Tremella|s__Tremella_foliacea	0	0	0	0	0	0	0	0	0	0	0	0	0	0	0	0	0	0	0	0	0	0	0	0	0	0	0	0	0	0	0	0	0	0	0.0025	0	0	0	0	0	0	0	0.00247	0	0	0	0	0	0
d__Fungi|p__Basidiomycota|c__Tremellomycetes|o__Tremellales|f__Tremellales_unclassified	0	0	0	0	0	0	0	0	0	0	0	0	0	0	0	0	0	0	0	0	0	0	0.00502	0	0.07888	0.0372	0	0	0	0	0	0	0	0	0	0	0	0	0	0	0	0	0	0	0	0	0.01726	0	0
d__Fungi|p__Basidiomycota|c__Tremellomycetes|o__Tremellales|f__Tremellales_unclassified|g__Tremellales_unclassified	0	0	0	0	0	0	0	0	0	0	0	0	0	0	0	0	0	0	0	0	0	0	0.00502	0	0.07888	0.0372	0	0	0	0	0	0	0	0	0	0	0	0	0	0	0	0	0	0	0	0	0.01726	0	0
d__Fungi|p__Basidiomycota|c__Tremellomycetes|o__Tremellales|f__Tremellales_unclassified|g__Tremellales_unclassified|s__Tremellales_unclassified	0	0	0	0	0	0	0	0	0	0	0	0	0	0	0	0	0	0	0	0	0	0	0.00502	0	0.07888	0.0372	0	0	0	0	0	0	0	0	0	0	0	0	0	0	0	0	0	0	0	0	0.01726	0	0
d__Fungi|p__Basidiomycota|c__Tremellomycetes|o__Trichosporonales	0	4.08468	0	0	0	0.2917	0.01277	0	0	0	0	0	0	0	0	0	0	0	0	0	0	0	0.23615	0.16565	15.191	2.77325	0	0	0.00924	0	0	0.01315	0	0	0	0.11479	0	0	0.42211	0.01084	0	0	0	0	0.00997	0	0.16028	0	0
d__Fungi|p__Basidiomycota|c__Tremellomycetes|o__Trichosporonales|f__Trichosporonaceae	0	4.08468	0	0	0	0.2917	0.01277	0	0	0	0	0	0	0	0	0	0	0	0	0	0	0	0.23615	0.16565	15.191	2.77325	0	0	0.00924	0	0	0.01315	0	0	0	0.11479	0	0	0.42211	0.01084	0	0	0	0	0.00997	0	0.16028	0	0
d__Fungi|p__Basidiomycota|c__Tremellomycetes|o__Trichosporonales|f__Trichosporonaceae|g__Asterotremella	0	0	0	0	0	0.2917	0	0	0	0	0	0	0	0	0	0	0	0	0	0	0	0	0	0	0	0	0	0	0	0	0	0	0	0	0	0	0	0	0	0	0	0	0	0	0	0	0	0	0
d__Fungi|p__Basidiomycota|c__Tremellomycetes|o__Trichosporonales|f__Trichosporonaceae|g__Asterotremella|s__Asterotremella_humicola	0	0	0	0	0	0.2917	0	0	0	0	0	0	0	0	0	0	0	0	0	0	0	0	0	0	0	0	0	0	0	0	0	0	0	0	0	0	0	0	0	0	0	0	0	0	0	0	0	0	0
d__Fungi|p__Basidiomycota|c__Tremellomycetes|o__Trichosporonales|f__Trichosporonaceae|g__Trichosporon	0	4.08468	0	0	0	0	0.01277	0	0	0	0	0	0	0	0	0	0	0	0	0	0	0	0.23615	0.16565	15.191	2.77325	0	0	0.00924	0	0	0.01315	0	0	0	0.11479	0	0	0.42211	0.01084	0	0	0	0	0.00997	0	0.16028	0	0
d__Fungi|p__Basidiomycota|c__Tremellomycetes|o__Trichosporonales|f__Trichosporonaceae|g__Trichosporon|s__Trichosporon_asteroides	0	4.08468	0	0	0	0	0.00766	0	0	0	0	0	0	0	0	0	0	0	0	0	0	0	0.16455	0.13015	8.92162	2.77325	0	0	0.00924	0	0	0	0	0	0	0	0	0	0	0	0	0	0	0	0.00374	0	0.06658	0	0
d__Fungi|p__Basidiomycota|c__Tremellomycetes|o__Trichosporonales|f__Trichosporonaceae|g__Trichosporon|s__Trichosporon_domesticum	0	0	0	0	0	0	0	0	0	0	0	0	0	0	0	0	0	0	0	0	0	0	0	0.02958	0	0	0	0	0	0	0	0	0	0	0	0	0	0	0.00415	0.01084	0	0	0	0	0.00623	0	0	0	0
d__Fungi|p__Basidiomycota|c__Tremellomycetes|o__Trichosporonales|f__Trichosporonaceae|g__Trichosporon|s__Trichosporon_moniliiforme	0	0	0	0	0	0	0	0	0	0	0	0	0	0	0	0	0	0	0	0	0	0	0	0	0	0	0	0	0	0	0	0	0	0	0	0	0	0	0	0	0	0	0	0	0	0	0.02589	0	0
d__Fungi|p__Basidiomycota|c__Tremellomycetes|o__Trichosporonales|f__Trichosporonaceae|g__Trichosporon|s__Trichosporon_terricola	0	0	0	0	0	0	0	0	0	0	0	0	0	0	0	0	0	0	0	0	0	0	0	0	0	0	0	0	0	0	0	0.01315	0	0	0	0	0	0	0.41796	0	0	0	0	0	0	0	0	0	0
d__Fungi|p__Basidiomycota|c__Tremellomycetes|o__Trichosporonales|f__Trichosporonaceae|g__Trichosporon|s__Trichosporon_unclassified	0	0	0	0	0	0	0.00511	0	0	0	0	0	0	0	0	0	0	0	0	0	0	0	0.0716	0.00592	6.26941	0	0	0	0	0	0	0	0	0	0	0.11479	0	0	0	0	0	0	0	0	0	0	0.06781	0	0
d__Fungi|p__Basidiomycota|c__Ustilaginomycetes	0	0	0	0	0	0	0.02043	0	0	0	0	0	0	0	0	0	0	0	0	0	0	0	0	0	0	0	0	0	0	0	0.00363	0	0	0	0	0	0	0	0	0	0	0	0	0	0	0	0	0	0
d__Fungi|p__Basidiomycota|c__Ustilaginomycetes|o__Ustilaginales	0	0	0	0	0	0	0.02043	0	0	0	0	0	0	0	0	0	0	0	0	0	0	0	0	0	0	0	0	0	0	0	0.00363	0	0	0	0	0	0	0	0	0	0	0	0	0	0	0	0	0	0
d__Fungi|p__Basidiomycota|c__Ustilaginomycetes|o__Ustilaginales|f__Ustilaginaceae	0	0	0	0	0	0	0.02043	0	0	0	0	0	0	0	0	0	0	0	0	0	0	0	0	0	0	0	0	0	0	0	0.00363	0	0	0	0	0	0	0	0	0	0	0	0	0	0	0	0	0	0
d__Fungi|p__Basidiomycota|c__Ustilaginomycetes|o__Ustilaginales|f__Ustilaginaceae|g__Pseudozyma	0	0	0	0	0	0	0.02043	0	0	0	0	0	0	0	0	0	0	0	0	0	0	0	0	0	0	0	0	0	0	0	0.00363	0	0	0	0	0	0	0	0	0	0	0	0	0	0	0	0	0	0
d__Fungi|p__Basidiomycota|c__Ustilaginomycetes|o__Ustilaginales|f__Ustilaginaceae|g__Pseudozyma|s__Pseudozyma_antarctica	0	0	0	0	0	0	0.02043	0	0	0	0	0	0	0	0	0	0	0	0	0	0	0	0	0	0	0	0	0	0	0	0	0	0	0	0	0	0	0	0	0	0	0	0	0	0	0	0	0	0
d__Fungi|p__Basidiomycota|c__Ustilaginomycetes|o__Ustilaginales|f__Ustilaginaceae|g__Pseudozyma|s__Pseudozyma_churashimaensis	0	0	0	0	0	0	0	0	0	0	0	0	0	0	0	0	0	0	0	0	0	0	0	0	0	0	0	0	0	0	0.00363	0	0	0	0	0	0	0	0	0	0	0	0	0	0	0	0	0	0
d__Fungi|p__Basidiomycota|c__Ustilaginomycotina_Incertae_sedis	1.82438	0.00735	1.18054	19.4337	0.03837	3.80273	3.61029	5.14192	0.00973	5.18208	0.16509	7.46518	44.8285	0	3.98789	3.46358	2.74138	7.28674	35.6642	0.02801	1.82647	0.01174	1.26363	1.6422	3.11314	0.00641	16.0879	0.03892	0.0462	4.07225	96.8782	5.89692	5.74182	29.1067	3.71128	0.23946	32.6274	2.91715	85.3009	0.42773	8.3251	0.55878	3.26787	4.46318	6.66625	84.5168	0.03699	0	1.25845
d__Fungi|p__Basidiomycota|c__Ustilaginomycotina_Incertae_sedis|o__Malasseziales	1.82438	0.00735	1.18054	19.4337	0.03837	3.80273	3.61029	5.14192	0.00973	5.18208	0.16509	7.46518	44.8285	0	3.98789	3.46358	2.74138	7.28674	35.6642	0.02801	1.82647	0.01174	1.26363	1.6422	3.11314	0.00641	16.0879	0.03892	0.0462	4.07225	96.8782	5.89692	5.74182	29.1067	3.71128	0.23946	32.6274	2.91715	85.3009	0.42773	8.3251	0.55878	3.26787	4.46318	6.66625	84.5168	0.03699	0	1.25845
d__Fungi|p__Basidiomycota|c__Ustilaginomycotina_Incertae_sedis|o__Malasseziales|f__Malasseziales_Incertae_sedis	1.82438	0.00735	1.18054	19.4337	0.03837	3.80273	3.61029	5.14192	0.00973	5.18208	0.16509	7.46518	44.8285	0	3.98789	3.46358	2.74138	7.28674	35.6642	0.02801	1.82647	0.01174	1.26363	1.6422	3.11314	0.00641	16.0879	0.03892	0.0462	4.07225	96.8782	5.89692	5.74182	29.1067	3.71128	0.23946	32.6274	2.91715	85.3009	0.42773	8.3251	0.55878	3.26787	4.46318	6.66625	84.5168	0.03699	0	1.25845
d__Fungi|p__Basidiomycota|c__Ustilaginomycotina_Incertae_sedis|o__Malasseziales|f__Malasseziales_Incertae_sedis|g__Malassezia	1.82438	0.00735	1.18054	19.4337	0.03837	3.80273	3.61029	5.14192	0.00973	5.18208	0.16509	7.46518	44.8285	0	3.98789	3.46358	2.74138	7.28674	35.6642	0.02801	1.82647	0.01174	1.26363	1.6422	3.11314	0.00641	16.0879	0.03892	0.0462	4.07225	96.8782	5.89692	5.74182	29.1067	3.71128	0.23946	32.6274	2.91715	85.3009	0.42773	8.3251	0.55878	3.26787	4.46318	6.66625	84.5168	0.03699	0	1.25845
d__Fungi|p__Basidiomycota|c__Ustilaginomycotina_Incertae_sedis|o__Malasseziales|f__Malasseziales_Incertae_sedis|g__Malassezia|s__Malassezia_dermatis	0	0	0.20757	0	0	2.45666	0	0	0	0	0	0	0	0	0	0	0	0	0.01758	0	0	0	0	0	0	0	1.04898	0.00519	0	0.008	23.1	0	1.24599	0.29995	0	0	0	0	0	0	0	0.02359	0	0	0	0	0	0	0.00429
d__Fungi|p__Basidiomycota|c__Ustilaginomycotina_Incertae_sedis|o__Malasseziales|f__Malasseziales_Incertae_sedis|g__Malassezia|s__Malassezia_globosa	0.06524	0	0.01168	0	0.00639	0	3.5873	0	0	0	0.10886	0.01557	30.8218	0	0.05832	2.06915	2.74138	0.21189	24.6698	0.00974	0	0.01174	0.618	1.45171	2.95785	0	0.01317	0	0.00792	0	0	0.00957	0.0501	7.63492	0	0.02839	31.7672	0	11.8883	0.00723	2.17987	0	0.01236	1.00252	5.71927	0	0.02836	0	0.02143
d__Fungi|p__Basidiomycota|c__Ustilaginomycotina_Incertae_sedis|o__Malasseziales|f__Malasseziales_Incertae_sedis|g__Malassezia|s__Malassezia_japonica	0.02779	0	0	0	0	0	0	0	0	0	0	0	0	0	0.02357	0.51425	0	0	0	0	0	0	0.04773	0	0	0	0	0	0	0	0	0	0	0	0	0	0	0	0	0	0	0	0	0	0	0	0	0	0
d__Fungi|p__Basidiomycota|c__Ustilaginomycotina_Incertae_sedis|o__Malasseziales|f__Malasseziales_Incertae_sedis|g__Malassezia|s__Malassezia_restricta	1.73135	0.00735	0.95221	19.4337	0.01663	1.34607	0.02299	5.14192	0.00973	5.18208	0.04187	7.44961	13.9705	0	3.906	0.88018	0	7.07485	10.948	0.01827	1.82647	0	0.59539	0.19049	0.14173	0.00641	15.0078	0.03373	0.03828	4.06425	73.7733	5.88735	4.4149	21.1718	3.67759	0.21107	0.86022	2.91715	73.4126	0.4205	6.12874	0.53519	3.23573	3.46066	0.94698	84.5168	0.00863	0	1.19988
d__Fungi|p__Basidiomycota|c__Ustilaginomycotina_Incertae_sedis|o__Malasseziales|f__Malasseziales_Incertae_sedis|g__Malassezia|s__Malassezia_slooffiae	0	0	0.00908	0	0.01535	0	0	0	0	0	0.01436	0	0.03613	0	0	0	0	0	0.02888	0	0	0	0	0	0	0	0.01796	0	0	0	0	0	0.03083	0	0.03369	0	0	0	0	0	0.01649	0	0.01978	0	0	0	0	0	0.03285
d__Fungi|p__Basidiomycota|c__Ustilaginomycotina_Incertae_sedis|o__Malasseziales|f__Malasseziales_Incertae_sedis|g__Malassezia|s__Malassezia_sympodialis	0	0	0	0	0	0	0	0	0	0	0	0	0	0	0	0	0	0	0	0	0	0	0.00251	0	0.01356	0	0	0	0	0	0	0	0	0	0	0	0	0	0	0	0	0	0	0	0	0	0	0	0
d__Fungi|p__Basidiomycota|c__Ustilaginomycotina_Incertae_sedis|o__Malasseziales|f__Malasseziales_Incertae_sedis|g__Malassezia|s__Malassezia_unclassified	0	0	0	0	0	0	0	0	0	0	0	0	0	0	0	0	0	0	0	0	0	0	0	0	0	0	0	0	0	0	0.00484	0	0	0	0	0	0	0	0	0	0	0	0	0	0	0	0	0	0
d__Fungi|p__Basidiomycota|c__Wallemiomycetes	0	0	0	0	0	0	0.06258	0	0	5.45365	0	0	0	0	0	0	0	7.56879	0	0	0	0	0.02387	0.084	0	0	0	0	0.04752	0	0	0.08371	0	0	0	0	0	0	0	0.35182	0	0	0	0	0	0	0	0	0
d__Fungi|p__Basidiomycota|c__Wallemiomycetes|o__Wallemiales	0	0	0	0	0	0	0.06258	0	0	5.45365	0	0	0	0	0	0	0	7.56879	0	0	0	0	0.02387	0.084	0	0	0	0	0.04752	0	0	0.08371	0	0	0	0	0	0	0	0.35182	0	0	0	0	0	0	0	0	0
d__Fungi|p__Basidiomycota|c__Wallemiomycetes|o__Wallemiales|f__Wallemiaceae	0	0	0	0	0	0	0.06258	0	0	5.45365	0	0	0	0	0	0	0	7.56879	0	0	0	0	0.02387	0.084	0	0	0	0	0.04752	0	0	0.08371	0	0	0	0	0	0	0	0.35182	0	0	0	0	0	0	0	0	0
d__Fungi|p__Basidiomycota|c__Wallemiomycetes|o__Wallemiales|f__Wallemiaceae|g__Wallemia	0	0	0	0	0	0	0.06258	0	0	5.45365	0	0	0	0	0	0	0	7.56879	0	0	0	0	0.02387	0.084	0	0	0	0	0.04752	0	0	0.08371	0	0	0	0	0	0	0	0.35182	0	0	0	0	0	0	0	0	0
d__Fungi|p__Basidiomycota|c__Wallemiomycetes|o__Wallemiales|f__Wallemiaceae|g__Wallemia|s__Wallemia_canadensis	0	0	0	0	0	0	0	0	0	5.45365	0	0	0	0	0	0	0	4.65465	0	0	0	0	0	0.084	0	0	0	0	0.04752	0	0	0.04425	0	0	0	0	0	0	0	0.35182	0	0	0	0	0	0	0	0	0
d__Fungi|p__Basidiomycota|c__Wallemiomycetes|o__Wallemiales|f__Wallemiaceae|g__Wallemia|s__Wallemia_muriae	0	0	0	0	0	0	0.06258	0	0	0	0	0	0	0	0	0	0	2.91414	0	0	0	0	0	0	0	0	0	0	0	0	0	0.03946	0	0	0	0	0	0	0	0	0	0	0	0	0	0	0	0	0
d__Fungi|p__Basidiomycota|c__Wallemiomycetes|o__Wallemiales|f__Wallemiaceae|g__Wallemia|s__Wallemia_sebi	0	0	0	0	0	0	0	0	0	0	0	0	0	0	0	0	0	0	0	0	0	0	0.02387	0	0	0	0	0	0	0	0	0	0	0	0	0	0	0	0	0	0	0	0	0	0	0	0	0	0
d__Fungi|p__Chytridiomycota	0	0	0	0	0	0	0	0	0	0	0	0	0	0	0	0	0	10.6398	0.00377	0	0	0	3.46556	0	0	0	0	0	0	0	0	0.00718	0	0	0	0	0	0	0	0.00602	0	0	0	0	0	0	0.00247	0	0
d__Fungi|p__Chytridiomycota|c__Chytridiomycetes	0	0	0	0	0	0	0	0	0	0	0	0	0	0	0	0	0	10.6398	0.00377	0	0	0	3.46556	0	0	0	0	0	0	0	0	0	0	0	0	0	0	0	0	0.00602	0	0	0	0	0	0	0	0	0
d__Fungi|p__Chytridiomycota|c__Chytridiomycetes|o__Spizellomycetales	0	0	0	0	0	0	0	0	0	0	0	0	0	0	0	0	0	10.6398	0.00377	0	0	0	3.46556	0	0	0	0	0	0	0	0	0	0	0	0	0	0	0	0	0.00602	0	0	0	0	0	0	0	0	0
d__Fungi|p__Chytridiomycota|c__Chytridiomycetes|o__Spizellomycetales|f__Spizellomycetaceae	0	0	0	0	0	0	0	0	0	0	0	0	0	0	0	0	0	10.6398	0.00377	0	0	0	3.46556	0	0	0	0	0	0	0	0	0	0	0	0	0	0	0	0	0.00602	0	0	0	0	0	0	0	0	0
d__Fungi|p__Chytridiomycota|c__Chytridiomycetes|o__Spizellomycetales|f__Spizellomycetaceae|g__Spizellomyces	0	0	0	0	0	0	0	0	0	0	0	0	0	0	0	0	0	10.6398	0.00377	0	0	0	3.46556	0	0	0	0	0	0	0	0	0	0	0	0	0	0	0	0	0.00602	0	0	0	0	0	0	0	0	0
d__Fungi|p__Chytridiomycota|c__Chytridiomycetes|o__Spizellomycetales|f__Spizellomycetaceae|g__Spizellomyces|s__Spizellomyces_punctatus	0	0	0	0	0	0	0	0	0	0	0	0	0	0	0	0	0	10.6398	0	0	0	0	3.46556	0	0	0	0	0	0	0	0	0	0	0	0	0	0	0	0	0.00602	0	0	0	0	0	0	0	0	0
d__Fungi|p__Chytridiomycota|c__Chytridiomycetes|o__Spizellomycetales|f__Spizellomycetaceae|g__Spizellomyces|s__Spizellomyces_unclassified	0	0	0	0	0	0	0	0	0	0	0	0	0	0	0	0	0	0	0.00377	0	0	0	0	0	0	0	0	0	0	0	0	0	0	0	0	0	0	0	0	0	0	0	0	0	0	0	0	0	0
d__Fungi|p__Chytridiomycota|c__Chytridiomycetes|o__Spizellomycetales|f__Spizellomycetaceae|g__Spizellomycetaceae_unclassified	0	0	0	0	0	0	0	0	0	0	0	0	0	0	0	0	0	0	0	0	0	0	0	0	0	0	0	0	0	0	0	0	0	0	0	0	0	0	0	0	0	0	0	0	0	0	0	0	0
d__Fungi|p__Chytridiomycota|c__Chytridiomycetes|o__Spizellomycetales|f__Spizellomycetaceae|g__Spizellomycetaceae_unclassified|s__Spizellomycetaceae_unclassified	0	0	0	0	0	0	0	0	0	0	0	0	0	0	0	0	0	0	0	0	0	0	0	0	0	0	0	0	0	0	0	0	0	0	0	0	0	0	0	0	0	0	0	0	0	0	0	0	0
d__Fungi|p__Chytridiomycota|c__Chytridiomycota_unclassified	0	0	0	0	0	0	0	0	0	0	0	0	0	0	0	0	0	0	0	0	0	0	0	0	0	0	0	0	0	0	0	0.00718	0	0	0	0	0	0	0	0	0	0	0	0	0	0	0.00247	0	0
d__Fungi|p__Chytridiomycota|c__Chytridiomycota_unclassified|o__Chytridiomycota_unclassified	0	0	0	0	0	0	0	0	0	0	0	0	0	0	0	0	0	0	0	0	0	0	0	0	0	0	0	0	0	0	0	0.00718	0	0	0	0	0	0	0	0	0	0	0	0	0	0	0.00247	0	0
d__Fungi|p__Chytridiomycota|c__Chytridiomycota_unclassified|o__Chytridiomycota_unclassified|f__Chytridiomycota_unclassified	0	0	0	0	0	0	0	0	0	0	0	0	0	0	0	0	0	0	0	0	0	0	0	0	0	0	0	0	0	0	0	0.00718	0	0	0	0	0	0	0	0	0	0	0	0	0	0	0.00247	0	0
d__Fungi|p__Chytridiomycota|c__Chytridiomycota_unclassified|o__Chytridiomycota_unclassified|f__Chytridiomycota_unclassified|g__Chytridiomycota_unclassified	0	0	0	0	0	0	0	0	0	0	0	0	0	0	0	0	0	0	0	0	0	0	0	0	0	0	0	0	0	0	0	0.00718	0	0	0	0	0	0	0	0	0	0	0	0	0	0	0.00247	0	0
d__Fungi|p__Chytridiomycota|c__Chytridiomycota_unclassified|o__Chytridiomycota_unclassified|f__Chytridiomycota_unclassified|g__Chytridiomycota_unclassified|s__Chytridiomycota_unclassified	0	0	0	0	0	0	0	0	0	0	0	0	0	0	0	0	0	0	0	0	0	0	0	0	0	0	0	0	0	0	0	0.00718	0	0	0	0	0	0	0	0	0	0	0	0	0	0	0.00247	0	0
d__Fungi|p__Chytridiomycota|c__Rhizophlyctidomycetes	0	0	0	0	0	0	0	0	0	0	0	0	0	0	0	0	0	0	0	0	0	0	0	0	0	0	0	0	0	0	0	0	0	0	0	0	0	0	0	0	0	0	0	0	0	0	0	0	0
d__Fungi|p__Chytridiomycota|c__Rhizophlyctidomycetes|o__Rhizophlyctidales	0	0	0	0	0	0	0	0	0	0	0	0	0	0	0	0	0	0	0	0	0	0	0	0	0	0	0	0	0	0	0	0	0	0	0	0	0	0	0	0	0	0	0	0	0	0	0	0	0
d__Fungi|p__Chytridiomycota|c__Rhizophlyctidomycetes|o__Rhizophlyctidales|f__Rhizophlyctidaceae	0	0	0	0	0	0	0	0	0	0	0	0	0	0	0	0	0	0	0	0	0	0	0	0	0	0	0	0	0	0	0	0	0	0	0	0	0	0	0	0	0	0	0	0	0	0	0	0	0
d__Fungi|p__Chytridiomycota|c__Rhizophlyctidomycetes|o__Rhizophlyctidales|f__Rhizophlyctidaceae|g__Rhizophlyctis	0	0	0	0	0	0	0	0	0	0	0	0	0	0	0	0	0	0	0	0	0	0	0	0	0	0	0	0	0	0	0	0	0	0	0	0	0	0	0	0	0	0	0	0	0	0	0	0	0
d__Fungi|p__Chytridiomycota|c__Rhizophlyctidomycetes|o__Rhizophlyctidales|f__Rhizophlyctidaceae|g__Rhizophlyctis|s__Rhizophlyctis_rosea	0	0	0	0	0	0	0	0	0	0	0	0	0	0	0	0	0	0	0	0	0	0	0	0	0	0	0	0	0	0	0	0	0	0	0	0	0	0	0	0	0	0	0	0	0	0	0	0	0
d__Fungi|p__Fungi_unclassified	0.10511	58.6018	0	0.3506	0.00256	0.04862	0.01532	0.02517	0	0.66905	0	1.10576	0.02275	0	28.2763	0.37444	0.0546	19.5762	0.0113	0.51997	0.88049	2.32978	0.35171	0.21888	14.7942	62.4777	0.02036	1.51651	13.4579	0	0.00484	0.28701	0.01541	3.0638	0.02121	0.01975	0.11571	0.0091	0.41242	0.98438	0.00254	0	0.88494	0.04198	0.2679	0.07742	11.2969	0.01952	0.01714
d__Fungi|p__Fungi_unclassified|c__Fungi_unclassified	0.10511	58.6018	0	0.3506	0.00256	0.04862	0.01532	0.02517	0	0.66905	0	1.10576	0.02275	0	28.2763	0.37444	0.0546	19.5762	0.0113	0.51997	0.88049	2.32978	0.35171	0.21888	14.7942	62.4777	0.02036	1.51651	13.4579	0	0.00484	0.28701	0.01541	3.0638	0.02121	0.01975	0.11571	0.0091	0.41242	0.98438	0.00254	0	0.88494	0.04198	0.2679	0.07742	11.2969	0.01952	0.01714
d__Fungi|p__Fungi_unclassified|c__Fungi_unclassified|o__Fungi_unclassified	0.10511	58.6018	0	0.3506	0.00256	0.04862	0.01532	0.02517	0	0.66905	0	1.10576	0.02275	0	28.2763	0.37444	0.0546	19.5762	0.0113	0.51997	0.88049	2.32978	0.35171	0.21888	14.7942	62.4777	0.02036	1.51651	13.4579	0	0.00484	0.28701	0.01541	3.0638	0.02121	0.01975	0.11571	0.0091	0.41242	0.98438	0.00254	0	0.88494	0.04198	0.2679	0.07742	11.2969	0.01952	0.01714
d__Fungi|p__Fungi_unclassified|c__Fungi_unclassified|o__Fungi_unclassified|f__Fungi_unclassified	0.10511	58.6018	0	0.3506	0.00256	0.04862	0.01532	0.02517	0	0.66905	0	1.10576	0.02275	0	28.2763	0.37444	0.0546	19.5762	0.0113	0.51997	0.88049	2.32978	0.35171	0.21888	14.7942	62.4777	0.02036	1.51651	13.4579	0	0.00484	0.28701	0.01541	3.0638	0.02121	0.01975	0.11571	0.0091	0.41242	0.98438	0.00254	0	0.88494	0.04198	0.2679	0.07742	11.2969	0.01952	0.01714
d__Fungi|p__Fungi_unclassified|c__Fungi_unclassified|o__Fungi_unclassified|f__Fungi_unclassified|g__Fungi_unclassified	0.10511	58.6018	0	0.3506	0.00256	0.04862	0.01532	0.02517	0	0.66905	0	1.10576	0.02275	0	28.2763	0.37444	0.0546	19.5762	0.0113	0.51997	0.88049	2.32978	0.35171	0.21888	14.7942	62.4777	0.02036	1.51651	13.4579	0	0.00484	0.28701	0.01541	3.0638	0.02121	0.01975	0.11571	0.0091	0.41242	0.98438	0.00254	0	0.88494	0.04198	0.2679	0.07742	11.2969	0.01952	0.01714
d__Fungi|p__Fungi_unclassified|c__Fungi_unclassified|o__Fungi_unclassified|f__Fungi_unclassified|g__Fungi_unclassified|s__Fungi_unclassified	0.10511	58.6018	0	0.3506	0.00256	0.04862	0.01532	0.02517	0	0.66905	0	1.10576	0.02275	0	28.2763	0.37444	0.0546	19.5762	0.0113	0.51997	0.88049	2.32978	0.35171	0.21888	14.7942	62.4777	0.02036	1.51651	13.4579	0	0.00484	0.28701	0.01541	3.0638	0.02121	0.01975	0.11571	0.0091	0.41242	0.98438	0.00254	0	0.88494	0.04198	0.2679	0.07742	11.2969	0.01952	0.01714
d__Fungi|p__Glomeromycota	0	0	0	0	0	0	0	0	0	0	0	0	0	0	0	0	0	0	0	0	0	0	0	0	0	0.00257	0.00479	0	0	0	0	0.00478	0	0	0	0	0	0	0	0	0	0	0	0	0	0	0	0	0
d__Fungi|p__Glomeromycota|c__Glomeromycetes	0	0	0	0	0	0	0	0	0	0	0	0	0	0	0	0	0	0	0	0	0	0	0	0	0	0.00257	0.00479	0	0	0	0	0.00478	0	0	0	0	0	0	0	0	0	0	0	0	0	0	0	0	0
d__Fungi|p__Glomeromycota|c__Glomeromycetes|o__Diversisporales	0	0	0	0	0	0	0	0	0	0	0	0	0	0	0	0	0	0	0	0	0	0	0	0	0	0	0	0	0	0	0	0.00478	0	0	0	0	0	0	0	0	0	0	0	0	0	0	0	0	0
d__Fungi|p__Glomeromycota|c__Glomeromycetes|o__Diversisporales|f__Diversisporaceae	0	0	0	0	0	0	0	0	0	0	0	0	0	0	0	0	0	0	0	0	0	0	0	0	0	0	0	0	0	0	0	0.00478	0	0	0	0	0	0	0	0	0	0	0	0	0	0	0	0	0
d__Fungi|p__Glomeromycota|c__Glomeromycetes|o__Diversisporales|f__Diversisporaceae|g__Diversispora	0	0	0	0	0	0	0	0	0	0	0	0	0	0	0	0	0	0	0	0	0	0	0	0	0	0	0	0	0	0	0	0.00478	0	0	0	0	0	0	0	0	0	0	0	0	0	0	0	0	0
d__Fungi|p__Glomeromycota|c__Glomeromycetes|o__Diversisporales|f__Diversisporaceae|g__Diversispora|s__Diversispora_epigaea	0	0	0	0	0	0	0	0	0	0	0	0	0	0	0	0	0	0	0	0	0	0	0	0	0	0	0	0	0	0	0	0.00478	0	0	0	0	0	0	0	0	0	0	0	0	0	0	0	0	0
d__Fungi|p__Glomeromycota|c__Glomeromycetes|o__Glomerales	0	0	0	0	0	0	0	0	0	0	0	0	0	0	0	0	0	0	0	0	0	0	0	0	0	0.00257	0.00479	0	0	0	0	0	0	0	0	0	0	0	0	0	0	0	0	0	0	0	0	0	0
d__Fungi|p__Glomeromycota|c__Glomeromycetes|o__Glomerales|f__Glomeraceae	0	0	0	0	0	0	0	0	0	0	0	0	0	0	0	0	0	0	0	0	0	0	0	0	0	0.00257	0.00479	0	0	0	0	0	0	0	0	0	0	0	0	0	0	0	0	0	0	0	0	0	0
d__Fungi|p__Glomeromycota|c__Glomeromycetes|o__Glomerales|f__Glomeraceae|g__Glomus	0	0	0	0	0	0	0	0	0	0	0	0	0	0	0	0	0	0	0	0	0	0	0	0	0	0	0.00479	0	0	0	0	0	0	0	0	0	0	0	0	0	0	0	0	0	0	0	0	0	0
d__Fungi|p__Glomeromycota|c__Glomeromycetes|o__Glomerales|f__Glomeraceae|g__Glomus|s__Glomus_etunicatum	0	0	0	0	0	0	0	0	0	0	0	0	0	0	0	0	0	0	0	0	0	0	0	0	0	0	0.00479	0	0	0	0	0	0	0	0	0	0	0	0	0	0	0	0	0	0	0	0	0	0
d__Fungi|p__Glomeromycota|c__Glomeromycetes|o__Glomerales|f__Glomeraceae|g__Rhizophagus	0	0	0	0	0	0	0	0	0	0	0	0	0	0	0	0	0	0	0	0	0	0	0	0	0	0.00257	0	0	0	0	0	0	0	0	0	0	0	0	0	0	0	0	0	0	0	0	0	0	0
d__Fungi|p__Glomeromycota|c__Glomeromycetes|o__Glomerales|f__Glomeraceae|g__Rhizophagus|s__Rhizophagus_custos	0	0	0	0	0	0	0	0	0	0	0	0	0	0	0	0	0	0	0	0	0	0	0	0	0	0.00257	0	0	0	0	0	0	0	0	0	0	0	0	0	0	0	0	0	0	0	0	0	0	0
d__Fungi|p__Mucoromycota	0	0	0	0	0	0	0	0	0	0	0	0	0	0	0	0	0	0	0	0	0	0	0	0	0	0	0	0	0	0	0	0	0	0	0	0	0	0	0	0	0	0	0	0	0	0	0	0	0
d__Fungi|p__Mucoromycota|c__Umbelopsidomycetes	0	0	0	0	0	0	0	0	0	0	0	0	0	0	0	0	0	0	0	0	0	0	0	0	0	0	0	0	0	0	0	0	0	0	0	0	0	0	0	0	0	0	0	0	0	0	0	0	0
d__Fungi|p__Mucoromycota|c__Umbelopsidomycetes|o__GS23	0	0	0	0	0	0	0	0	0	0	0	0	0	0	0	0	0	0	0	0	0	0	0	0	0	0	0	0	0	0	0	0	0	0	0	0	0	0	0	0	0	0	0	0	0	0	0	0	0
d__Fungi|p__Mucoromycota|c__Umbelopsidomycetes|o__GS23|f__GS23_unclassified	0	0	0	0	0	0	0	0	0	0	0	0	0	0	0	0	0	0	0	0	0	0	0	0	0	0	0	0	0	0	0	0	0	0	0	0	0	0	0	0	0	0	0	0	0	0	0	0	0
d__Fungi|p__Mucoromycota|c__Umbelopsidomycetes|o__GS23|f__GS23_unclassified|g__GS23_unclassified	0	0	0	0	0	0	0	0	0	0	0	0	0	0	0	0	0	0	0	0	0	0	0	0	0	0	0	0	0	0	0	0	0	0	0	0	0	0	0	0	0	0	0	0	0	0	0	0	0
d__Fungi|p__Mucoromycota|c__Umbelopsidomycetes|o__GS23|f__GS23_unclassified|g__GS23_unclassified|s__GS23_unclassified	0	0	0	0	0	0	0	0	0	0	0	0	0	0	0	0	0	0	0	0	0	0	0	0	0	0	0	0	0	0	0	0	0	0	0	0	0	0	0	0	0	0	0	0	0	0	0	0	0
d__Fungi|p__Neocallimastigomycota	0	0	0	0	0	0	0	0	0	0	0	0	0	0	0	0	0	0	0	0	0	0	0	0	0	0	0	0	0	0	0	0	0	0	0	85.6224	0	0	0	0	0	0	0	0	0	0	0	0	0
d__Fungi|p__Neocallimastigomycota|c__Neocallimastigomycetes	0	0	0	0	0	0	0	0	0	0	0	0	0	0	0	0	0	0	0	0	0	0	0	0	0	0	0	0	0	0	0	0	0	0	0	85.6224	0	0	0	0	0	0	0	0	0	0	0	0	0
d__Fungi|p__Neocallimastigomycota|c__Neocallimastigomycetes|o__Neocallimastigales	0	0	0	0	0	0	0	0	0	0	0	0	0	0	0	0	0	0	0	0	0	0	0	0	0	0	0	0	0	0	0	0	0	0	0	85.6224	0	0	0	0	0	0	0	0	0	0	0	0	0
d__Fungi|p__Neocallimastigomycota|c__Neocallimastigomycetes|o__Neocallimastigales|f__Neocallimastigaceae	0	0	0	0	0	0	0	0	0	0	0	0	0	0	0	0	0	0	0	0	0	0	0	0	0	0	0	0	0	0	0	0	0	0	0	85.6224	0	0	0	0	0	0	0	0	0	0	0	0	0
d__Fungi|p__Neocallimastigomycota|c__Neocallimastigomycetes|o__Neocallimastigales|f__Neocallimastigaceae|g__Cyllamyces	0	0	0	0	0	0	0	0	0	0	0	0	0	0	0	0	0	0	0	0	0	0	0	0	0	0	0	0	0	0	0	0	0	0	0	85.6224	0	0	0	0	0	0	0	0	0	0	0	0	0
d__Fungi|p__Neocallimastigomycota|c__Neocallimastigomycetes|o__Neocallimastigales|f__Neocallimastigaceae|g__Cyllamyces|s__Cyllamyces_aberensis	0	0	0	0	0	0	0	0	0	0	0	0	0	0	0	0	0	0	0	0	0	0	0	0	0	0	0	0	0	0	0	0	0	0	0	85.6224	0	0	0	0	0	0	0	0	0	0	0	0	0
d__Fungi|p__Rozellomycota	0	0	0	0	0	0	0	0	0	0	0	0	0	0	0	0	0	0	0	0	0	0	0	0	0	0	0	0	0	0	0	0	0	0	0	0	0	0	0	0	0	0	0	0	0	0	0	0	0
d__Fungi|p__Rozellomycota|c__Rozellomycotina_cls_Incertae_sedis	0	0	0	0	0	0	0	0	0	0	0	0	0	0	0	0	0	0	0	0	0	0	0	0	0	0	0	0	0	0	0	0	0	0	0	0	0	0	0	0	0	0	0	0	0	0	0	0	0
d__Fungi|p__Rozellomycota|c__Rozellomycotina_cls_Incertae_sedis|o__GS11	0	0	0	0	0	0	0	0	0	0	0	0	0	0	0	0	0	0	0	0	0	0	0	0	0	0	0	0	0	0	0	0	0	0	0	0	0	0	0	0	0	0	0	0	0	0	0	0	0
d__Fungi|p__Rozellomycota|c__Rozellomycotina_cls_Incertae_sedis|o__GS11|f__GS11_unclassified	0	0	0	0	0	0	0	0	0	0	0	0	0	0	0	0	0	0	0	0	0	0	0	0	0	0	0	0	0	0	0	0	0	0	0	0	0	0	0	0	0	0	0	0	0	0	0	0	0
d__Fungi|p__Rozellomycota|c__Rozellomycotina_cls_Incertae_sedis|o__GS11|f__GS11_unclassified|g__GS11_unclassified	0	0	0	0	0	0	0	0	0	0	0	0	0	0	0	0	0	0	0	0	0	0	0	0	0	0	0	0	0	0	0	0	0	0	0	0	0	0	0	0	0	0	0	0	0	0	0	0	0
d__Fungi|p__Rozellomycota|c__Rozellomycotina_cls_Incertae_sedis|o__GS11|f__GS11_unclassified|g__GS11_unclassified|s__GS11_unclassified	0	0	0	0	0	0	0	0	0	0	0	0	0	0	0	0	0	0	0	0	0	0	0	0	0	0	0	0	0	0	0	0	0	0	0	0	0	0	0	0	0	0	0	0	0	0	0	0	0
d__Fungi|p__Zoopagomycota	0	0	0	0	0	0	0	0	0	0	0	0	0	0	0	0	0	0	0	0	0	0	0	0	0	0	0	0	0	0	0	0	0	0	0	0	0	0	0	0	0	0	0	0	0	0	0.0074	0	0
d__Fungi|p__Zoopagomycota|c__Zoopagomycetes	0	0	0	0	0	0	0	0	0	0	0	0	0	0	0	0	0	0	0	0	0	0	0	0	0	0	0	0	0	0	0	0	0	0	0	0	0	0	0	0	0	0	0	0	0	0	0.0074	0	0
d__Fungi|p__Zoopagomycota|c__Zoopagomycetes|o__Zoopagales	0	0	0	0	0	0	0	0	0	0	0	0	0	0	0	0	0	0	0	0	0	0	0	0	0	0	0	0	0	0	0	0	0	0	0	0	0	0	0	0	0	0	0	0	0	0	0.0074	0	0
d__Fungi|p__Zoopagomycota|c__Zoopagomycetes|o__Zoopagales|f__Piptocephalidaceae	0	0	0	0	0	0	0	0	0	0	0	0	0	0	0	0	0	0	0	0	0	0	0	0	0	0	0	0	0	0	0	0	0	0	0	0	0	0	0	0	0	0	0	0	0	0	0.0074	0	0
d__Fungi|p__Zoopagomycota|c__Zoopagomycetes|o__Zoopagales|f__Piptocephalidaceae|g__Syncephalis	0	0	0	0	0	0	0	0	0	0	0	0	0	0	0	0	0	0	0	0	0	0	0	0	0	0	0	0	0	0	0	0	0	0	0	0	0	0	0	0	0	0	0	0	0	0	0.0074	0	0
d__Fungi|p__Zoopagomycota|c__Zoopagomycetes|o__Zoopagales|f__Piptocephalidaceae|g__Syncephalis|s__Syncephalis_unclassified	0	0	0	0	0	0	0	0	0	0	0	0	0	0	0	0	0	0	0	0	0	0	0	0	0	0	0	0	0	0	0	0	0	0	0	0	0	0	0	0	0	0	0	0	0	0	0.0074	0	0
d__Fungi|p__Zygomycota	0.00242	18.2353	0	0	0	0.00912	0.02554	0	0.00365	0	0	0	0.00535	0	0.0062	0.01094	0.00869	0	0.05399	0	0	0	62.0535	0.21651	58.1427	14.3665	0.00239	0	0.08711	0	0.00242	0.28343	0.01156	0.0252	23.9337	0	0.01827	0	0.01799	0	0.0038	0.00869	0.00494	0	0.00498	0	28.8654	0.0045	0.00429
d__Fungi|p__Zygomycota|c__Entomophthoromycotina_Incertae_sedis	0	0	0	0	0	0	0.02554	0	0	0	0	0	0	0	0	0	0	0	0	0	0	0	0	0	0	0	0	0	0	0	0.00242	0	0	0	0	0	0	0	0	0	0	0	0	0	0	0	0	0	0
d__Fungi|p__Zygomycota|c__Entomophthoromycotina_Incertae_sedis|o__Entomophthorales	0	0	0	0	0	0	0.02554	0	0	0	0	0	0	0	0	0	0	0	0	0	0	0	0	0	0	0	0	0	0	0	0.00242	0	0	0	0	0	0	0	0	0	0	0	0	0	0	0	0	0	0
d__Fungi|p__Zygomycota|c__Entomophthoromycotina_Incertae_sedis|o__Entomophthorales|f__Basidiobolaceae	0	0	0	0	0	0	0.02554	0	0	0	0	0	0	0	0	0	0	0	0	0	0	0	0	0	0	0	0	0	0	0	0.00242	0	0	0	0	0	0	0	0	0	0	0	0	0	0	0	0	0	0
d__Fungi|p__Zygomycota|c__Entomophthoromycotina_Incertae_sedis|o__Entomophthorales|f__Basidiobolaceae|g__Basidiobolus	0	0	0	0	0	0	0.02554	0	0	0	0	0	0	0	0	0	0	0	0	0	0	0	0	0	0	0	0	0	0	0	0.00242	0	0	0	0	0	0	0	0	0	0	0	0	0	0	0	0	0	0
d__Fungi|p__Zygomycota|c__Entomophthoromycotina_Incertae_sedis|o__Entomophthorales|f__Basidiobolaceae|g__Basidiobolus|s__Basidiobolus_magnus	0	0	0	0	0	0	0.02554	0	0	0	0	0	0	0	0	0	0	0	0	0	0	0	0	0	0	0	0	0	0	0	0.00242	0	0	0	0	0	0	0	0	0	0	0	0	0	0	0	0	0	0
d__Fungi|p__Zygomycota|c__Mucoromycotina_Incertae_sedis	0.00242	18.2353	0	0	0	0.00912	0	0	0.00365	0	0	0	0.00535	0	0.0062	0.01094	0.00869	0	0.05399	0	0	0	62.0535	0.21651	58.1427	14.3665	0.00239	0	0.08711	0	0	0.28343	0.01156	0.0252	23.9337	0	0.01827	0	0.01799	0	0.0038	0.00869	0.00494	0	0.00498	0	28.8654	0.0045	0.00429
d__Fungi|p__Zygomycota|c__Mucoromycotina_Incertae_sedis|o__Mortierellales	0	0	0	0	0	0	0	0	0	0	0	0	0.00535	0	0	0	0	0	0.05399	0	0	0	0.00377	0	0.00739	0.0808	0.00239	0	0	0	0	0	0.01156	0.0252	23.9337	0	0	0	0	0	0.0038	0.00869	0.00494	0	0	0	28.2847	0	0.00429
d__Fungi|p__Zygomycota|c__Mucoromycotina_Incertae_sedis|o__Mortierellales|f__Mortierellaceae	0	0	0	0	0	0	0	0	0	0	0	0	0.00535	0	0	0	0	0	0.05399	0	0	0	0.00377	0	0.00739	0.0808	0.00239	0	0	0	0	0	0.01156	0.0252	23.9337	0	0	0	0	0	0.0038	0.00869	0.00494	0	0	0	28.2847	0	0.00429
d__Fungi|p__Zygomycota|c__Mucoromycotina_Incertae_sedis|o__Mortierellales|f__Mortierellaceae|g__Mortierella	0	0	0	0	0	0	0	0	0	0	0	0	0.00535	0	0	0	0	0	0.05399	0	0	0	0.00377	0	0.00739	0.0808	0.00239	0	0	0	0	0	0.01156	0.0252	23.9337	0	0	0	0	0	0.0038	0.00869	0.00494	0	0	0	28.2847	0	0.00429
d__Fungi|p__Zygomycota|c__Mucoromycotina_Incertae_sedis|o__Mortierellales|f__Mortierellaceae|g__Mortierella|s__Mortierella_alpina	0	0	0	0	0	0	0	0	0	0	0	0	0.00535	0	0	0	0	0	0.00502	0	0	0	0	0	0	0	0	0	0	0	0	0	0.00257	0	0	0	0	0	0	0	0.0038	0	0	0	0	0	0.35137	0	0
d__Fungi|p__Zygomycota|c__Mucoromycotina_Incertae_sedis|o__Mortierellales|f__Mortierellaceae|g__Mortierella|s__Mortierella_chlamydospora	0	0	0	0	0	0	0	0	0	0	0	0	0	0	0	0	0	0	0	0	0	0	0.00377	0	0	0	0	0	0	0	0	0	0	0	0	0	0	0	0	0	0	0	0	0	0	0	0	0	0
d__Fungi|p__Zygomycota|c__Mucoromycotina_Incertae_sedis|o__Mortierellales|f__Mortierellaceae|g__Mortierella|s__Mortierella_elongata	0	0	0	0	0	0	0	0	0	0	0	0	0	0	0	0	0	0	0	0	0	0	0	0	0.00739	0.01539	0	0	0	0	0	0	0	0.01386	0	0	0	0	0	0	0	0.00869	0	0	0	0	6.18165	0	0
d__Fungi|p__Zygomycota|c__Mucoromycotina_Incertae_sedis|o__Mortierellales|f__Mortierellaceae|g__Mortierella|s__Mortierella_exigua	0	0	0	0	0	0	0	0	0	0	0	0	0	0	0	0	0	0	0	0	0	0	0	0	0	0	0	0	0	0	0	0	0	0	0	0	0	0	0	0	0	0	0	0	0	0	0.10973	0	0
d__Fungi|p__Zygomycota|c__Mucoromycotina_Incertae_sedis|o__Mortierellales|f__Mortierellaceae|g__Mortierella|s__Mortierella_humilis	0	0	0	0	0	0	0	0	0	0	0	0	0	0	0	0	0	0	0	0	0	0	0	0	0	0	0	0	0	0	0	0	0.00514	0.01134	23.9337	0	0	0	0	0	0	0	0.00494	0	0	0	0.02712	0	0
d__Fungi|p__Zygomycota|c__Mucoromycotina_Incertae_sedis|o__Mortierellales|f__Mortierellaceae|g__Mortierella|s__Mortierella_hyalina	0	0	0	0	0	0	0	0	0	0	0	0	0	0	0	0	0	0	0	0	0	0	0	0	0	0.04361	0	0	0	0	0	0	0.00385	0	0	0	0	0	0	0	0	0	0	0	0	0	11.1884	0	0.00429
d__Fungi|p__Zygomycota|c__Mucoromycotina_Incertae_sedis|o__Mortierellales|f__Mortierellaceae|g__Mortierella|s__Mortierella_indohii	0	0	0	0	0	0	0	0	0	0	0	0	0	0	0	0	0	0	0	0	0	0	0	0	0	0	0	0	0	0	0	0	0	0	0	0	0	0	0	0	0	0	0	0	0	0	0.06164	0	0
d__Fungi|p__Zygomycota|c__Mucoromycotina_Incertae_sedis|o__Mortierellales|f__Mortierellaceae|g__Mortierella|s__Mortierella_minutissima	0	0	0	0	0	0	0	0	0	0	0	0	0	0	0	0	0	0	0	0	0	0	0	0	0	0.01154	0	0	0	0	0	0	0	0	0	0	0	0	0	0	0	0	0	0	0	0	0.09493	0	0
d__Fungi|p__Zygomycota|c__Mucoromycotina_Incertae_sedis|o__Mortierellales|f__Mortierellaceae|g__Mortierella|s__Mortierella_polycephala	0	0	0	0	0	0	0	0	0	0	0	0	0	0	0	0	0	0	0	0	0	0	0	0	0	0	0	0	0	0	0	0	0	0	0	0	0	0	0	0	0	0	0	0	0	0	0.53384	0	0
d__Fungi|p__Zygomycota|c__Mucoromycotina_Incertae_sedis|o__Mortierellales|f__Mortierellaceae|g__Mortierella|s__Mortierella_unclassified	0	0	0	0	0	0	0	0	0	0	0	0	0	0	0	0	0	0	0.04897	0	0	0	0	0	0	0.01026	0.00239	0	0	0	0	0	0	0	0	0	0	0	0	0	0	0	0	0	0	0	9.73604	0	0
d__Fungi|p__Zygomycota|c__Mucoromycotina_Incertae_sedis|o__Mucorales	0.00242	18.2353	0	0	0	0.00912	0	0	0.00365	0	0	0	0	0	0.0062	0.01094	0.00869	0	0	0	0	0	62.0497	0.21651	58.1353	14.2831	0	0	0.08711	0	0	0.28343	0	0	0	0	0.01827	0	0.01799	0	0	0	0	0	0.00498	0	0.58069	0.0045	0
d__Fungi|p__Zygomycota|c__Mucoromycotina_Incertae_sedis|o__Mucorales|f__Mucoraceae	0.00242	18.2353	0	0	0	0.00912	0	0	0.00365	0	0	0	0	0	0.0062	0.01094	0.00869	0	0	0	0	0	62.0497	0.21651	58.1353	14.2831	0	0	0.08711	0	0	0.28343	0	0	0	0	0.01827	0	0.01799	0	0	0	0	0	0.00498	0	0.58069	0.0045	0
d__Fungi|p__Zygomycota|c__Mucoromycotina_Incertae_sedis|o__Mucorales|f__Mucoraceae|g__Actinomucor	0.00242	18.2353	0	0	0	0.00912	0	0	0.00365	0	0	0	0	0	0.0062	0.01094	0.00869	0	0	0	0	0	62.0497	0.21651	58.1353	14.2831	0	0	0.08711	0	0	0.28343	0	0	0	0	0.01827	0	0.01799	0	0	0	0	0	0.00498	0	0.54	0.0045	0
d__Fungi|p__Zygomycota|c__Mucoromycotina_Incertae_sedis|o__Mucorales|f__Mucoraceae|g__Actinomucor|s__Actinomucor_elegans	0.00242	18.2353	0	0	0	0.00912	0	0	0.00365	0	0	0	0	0	0.0062	0.01094	0.00869	0	0	0	0	0	62.0497	0.21651	58.1353	14.2831	0	0	0.08711	0	0	0.28343	0	0	0	0	0.01827	0	0.01799	0	0	0	0	0	0.00498	0	0.54	0.0045	0
d__Fungi|p__Zygomycota|c__Mucoromycotina_Incertae_sedis|o__Mucorales|f__Mucoraceae|g__Hyphomucor	0	0	0	0	0	0	0	0	0	0	0	0	0	0	0	0	0	0	0	0	0	0	0	0	0	0	0	0	0	0	0	0	0	0	0	0	0	0	0	0	0	0	0	0	0	0	0	0	0
d__Fungi|p__Zygomycota|c__Mucoromycotina_Incertae_sedis|o__Mucorales|f__Mucoraceae|g__Hyphomucor|s__Hyphomucor_assamensis	0	0	0	0	0	0	0	0	0	0	0	0	0	0	0	0	0	0	0	0	0	0	0	0	0	0	0	0	0	0	0	0	0	0	0	0	0	0	0	0	0	0	0	0	0	0	0	0	0
d__Fungi|p__Zygomycota|c__Mucoromycotina_Incertae_sedis|o__Mucorales|f__Mucoraceae|g__Mucor	0	0	0	0	0	0	0	0	0	0	0	0	0	0	0	0	0	0	0	0	0	0	0	0	0	0	0	0	0	0	0	0	0	0	0	0	0	0	0	0	0	0	0	0	0	0	0.03822	0	0
d__Fungi|p__Zygomycota|c__Mucoromycotina_Incertae_sedis|o__Mucorales|f__Mucoraceae|g__Mucoraceae_unclassified	0	0	0	0	0	0	0	0	0	0	0	0	0	0	0	0	0	0	0	0	0	0	0	0	0	0	0	0	0	0	0	0	0	0	0	0	0	0	0	0	0	0	0	0	0	0	0.00247	0	0
d__Fungi|p__Zygomycota|c__Mucoromycotina_Incertae_sedis|o__Mucorales|f__Mucoraceae|g__Mucoraceae_unclassified|s__Mucoraceae_unclassified	0	0	0	0	0	0	0	0	0	0	0	0	0	0	0	0	0	0	0	0	0	0	0	0	0	0	0	0	0	0	0	0	0	0	0	0	0	0	0	0	0	0	0	0	0	0	0.00247	0	0
d__Fungi|p__Zygomycota|c__Mucoromycotina_Incertae_sedis|o__Mucorales|f__Mucoraceae|g__Mucor|s__Mucor_circinelloides	0	0	0	0	0	0	0	0	0	0	0	0	0	0	0	0	0	0	0	0	0	0	0	0	0	0	0	0	0	0	0	0	0	0	0	0	0	0	0	0	0	0	0	0	0	0	0.01603	0	0
d__Fungi|p__Zygomycota|c__Mucoromycotina_Incertae_sedis|o__Mucorales|f__Mucoraceae|g__Mucor|s__Mucor_hiemalis	0	0	0	0	0	0	0	0	0	0	0	0	0	0	0	0	0	0	0	0	0	0	0	0	0	0	0	0	0	0	0	0	0	0	0	0	0	0	0	0	0	0	0	0	0	0	0.01726	0	0
d__Fungi|p__Zygomycota|c__Mucoromycotina_Incertae_sedis|o__Mucorales|f__Mucoraceae|g__Mucor|s__Mucor_hiemalis_f_hiemalis	0	0	0	0	0	0	0	0	0	0	0	0	0	0	0	0	0	0	0	0	0	0	0	0	0	0	0	0	0	0	0	0	0	0	0	0	0	0	0	0	0	0	0	0	0	0	0.00493	0	0
d__Fungi|p__Zygomycota|c__Mucoromycotina_Incertae_sedis|o__Mucorales|f__Mucoraceae|g__Mucor|s__Mucor_racemosus	0	0	0	0	0	0	0	0	0	0	0	0	0	0	0	0	0	0	0	0	0	0	0	0	0	0	0	0	0	0	0	0	0	0	0	0	0	0	0	0	0	0	0	0	0	0	0	0	0
d__Fungi|p__Zygomycota|c__Mucoromycotina_Incertae_sedis|o__Mucoromycotina_Incertae_sedis_unclassified	0	0	0	0	0	0	0	0	0	0	0	0	0	0	0	0	0	0	0	0	0	0	0	0	0	0.00257	0	0	0	0	0	0	0	0	0	0	0	0	0	0	0	0	0	0	0	0	0	0	0
d__Fungi|p__Zygomycota|c__Mucoromycotina_Incertae_sedis|o__Mucoromycotina_Incertae_sedis_unclassified|f__Mucoromycotina_Incertae_sedis_unclassified	0	0	0	0	0	0	0	0	0	0	0	0	0	0	0	0	0	0	0	0	0	0	0	0	0	0.00257	0	0	0	0	0	0	0	0	0	0	0	0	0	0	0	0	0	0	0	0	0	0	0
d__Fungi|p__Zygomycota|c__Mucoromycotina_Incertae_sedis|o__Mucoromycotina_Incertae_sedis_unclassified|f__Mucoromycotina_Incertae_sedis_unclassified|g__Mucoromycotina_Incertae_sedis_unclassified	0	0	0	0	0	0	0	0	0	0	0	0	0	0	0	0	0	0	0	0	0	0	0	0	0	0.00257	0	0	0	0	0	0	0	0	0	0	0	0	0	0	0	0	0	0	0	0	0	0	0
d__Fungi|p__Zygomycota|c__Mucoromycotina_Incertae_sedis|o__Mucoromycotina_Incertae_sedis_unclassified|f__Mucoromycotina_Incertae_sedis_unclassified|g__Mucoromycotina_Incertae_sedis_unclassified|s__Mucoromycotina_Incertae_sedis_unclassified	0	0	0	0	0	0	0	0	0	0	0	0	0	0	0	0	0	0	0	0	0	0	0	0	0	0.00257	0	0	0	0	0	0	0	0	0	0	0	0	0	0	0	0	0	0	0	0	0	0	0
[truncated: 31 more columns]
