# Supplementary figures and images for: Alteration of Colonic Bacterial and Fungal Composition and Their Inter- and Intra-Kingdom Interaction in Patients with Adenomas with Low-Grade Dysplasia
Source: MDPI journal article supplement (doi:10.3390/microorganisms11051327), 2023-05-18

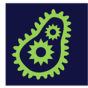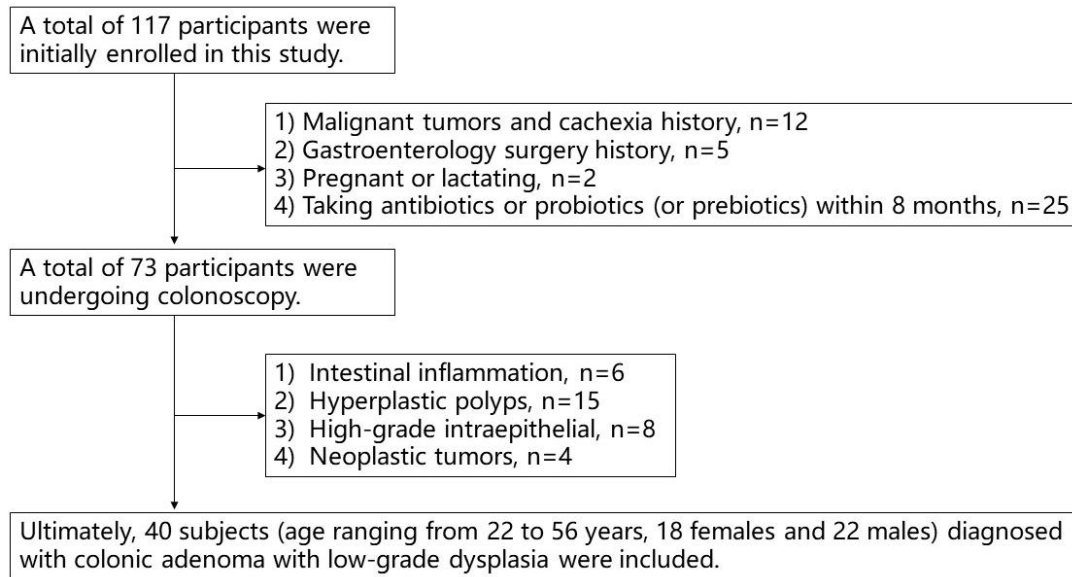

Supplementary Figure S1. Flowchart of participant selection.

Supplement: s1 [file s1]
